# Supplementary material for: A genome scan for milk production traits in dairy goats reveals two new mutations in Dgat1 reducing milk fat content
Source: PubMed Central journal article supplement (PMC5431851; doi:10.1038/s41598-017-02052-0), 2017-05-12
Supplement: 41598_2017_2052_MOESM1_ESM.pdf [file 41598_2017_2052_MOESM1_ESM.pdf]

**A genome scan for milk production traits in dairy goats reveals two new mutations in *Dgat1* reducing milk fat content**

Pauline Martin<sup>1</sup>,

Isabelle Palhière<sup>1</sup>,

Cyrielle Maroteau<sup>1,2</sup>,

Philippe Bardou<sup>1,3</sup>,

Kamila Canale-Tabet<sup>1</sup>,

Julien Sarry<sup>1</sup>,

Florent Woloszyn<sup>1</sup>,

Justine Bertrand-Michel<sup>4</sup>,

Ines Racke<sup>5</sup>,

Hüseyin Besir<sup>5</sup>,

Rachel Rupp<sup>1¶</sup>

Gwenola Tosser-Klopp<sup>1\*¶</sup>

## Supporting information

S1 Table: Genome scan for milk production traits in a daughter design of 1,961 dairy goats, based on association analyses (\*\*\*: 5% genome-wide significance).

S1 Fig: Manhattan plot of likelihood ratio test profiles for five milk production traits: milk yield (MY), fat yield (FY), protein yield (PY), fat content (FC) and protein content (PC) in the joint Alpine and Saanen population. The solid horizontal lines represent the 5% genome-wide thresholds (average over the 29 autosomes).

S2 Table: Whole results from the linkage and association analyses for five milk production traits: milk yield (MY), fat yield (FY), protein yield (PY), fat content (FC) and protein content (PC) in the three populations, i.e. Saanene, Alpine and joint Alpine and Saanen populations. The Likelihood ratio tests (LRT) are given for each position tested over the 29 autosomes.

S2 Fig: Conservation of the DGAT1 protein sequence between cattle, sheep and goat species, using the weblogo software (<http://weblogo.threeplusone.com/>). Amino acids are colored according to their chemical properties: hydrophilic amino acids (RKDENQ) in blue, neutral amino acids (SGHTAP) in green and hydrophobic amino acids (YVMCLFIW) in black. The statistical model for letter height and error bars is detailed in the weblogo manual (<http://weblogo.threeplusone.com/manual.html>).

S3 Fig: Frequency of the T allele for the R396W in the artificial insemination males depending on their year of birth.

S3 Table: Percent identity matrix of the DGAT1 protein sequence between different species of ruminants.

S4 Table: List of primers used in the study. Each primer is defined by a name, its sequence, its strand, its location on LT221856 (bp), its location on chromosome 14 of the reference genome, and indications of the protocol used and the parts of the gene concerned are given.

S1 Table

| CHI       | TRAIT     | Breed             | LRTmax        | Position<br>(*100 Mb) | 95%CI (*100 Mb) |              |    |
|-----------|-----------|-------------------|---------------|-----------------------|-----------------|--------------|----|
|           |           |                   |               |                       | min             | max          |    |
| 2         | PC        | Alpine            | 49,98         | 0,057                 | 0,056           | 0,058        | 1  |
| 2         | FC        | Two breeds        | 52,17         | 0,059                 | 0,058           | 0,060        | 2  |
| 2         | FC        | Alpine            | 48,31         | 0,464                 | 0,463           | 0,465        | 3  |
| 3         | PC        | Saanen            | 46,23         | 0,359                 | 0,358           | 0,360        | 4  |
| 4         | FC        | Two breeds        | 52,69         | 0,080                 | 0,079           | 0,081        | 5  |
| 4         | MY        | Alpine            | 46,45         | 1,034                 | 1,033           | 1,035        | 6  |
| 5         | PC        | Two breeds        | 49,93         | 0,316                 | 0,315           | 0,317        | 7  |
| 5         | PC        | Saanen            | 59,10         | 0,317                 | 0,316           | 0,318        | 8  |
| <b>6</b>  | <b>FC</b> | <b>Alpine</b>     | <b>60,06</b>  | <b>0,764</b>          | <b>0,763</b>    | <b>0,765</b> | 9  |
| <b>6</b>  | <b>FC</b> | <b>Two breeds</b> | <b>83,34</b>  | <b>0,826</b>          | <b>0,825</b>    | <b>0,828</b> | 10 |
| <b>6</b>  | <b>PC</b> | <b>Two breeds</b> | <b>357,51</b> | <b>0,826</b>          | <b>0,825</b>    | <b>0,827</b> | 11 |
| <b>6</b>  | <b>PC</b> | <b>Alpine</b>     | <b>192,29</b> | <b>0,826</b>          | <b>0,825</b>    | <b>0,827</b> | 12 |
| <b>6</b>  | <b>FC</b> | <b>Saanen</b>     | <b>75,31</b>  | <b>0,827</b>          | <b>0,826</b>    | <b>0,828</b> | 13 |
| <b>6</b>  | <b>PC</b> | <b>Saanen</b>     | <b>224,74</b> | <b>0,827</b>          | <b>0,826</b>    | <b>0,828</b> | 14 |
| 6         | MY        | Saanen            | 48,15         | 0,898                 | 0,897           | 0,899        | 15 |
| 7         | FY        | Two breeds        | 58,54         | 0,287                 | 0,286           | 0,288        | 16 |
| 7         | PY        | Two breeds        | 52,18         | 0,298                 | 0,297           | 0,299        | 17 |
| 7         | PC        | Alpine            | 46,82         | 0,403                 | 0,402           | 0,404        | 18 |
| 7         | MY        | Saanen            | 54,02         | 0,554                 | 0,553           | 0,555        | 19 |
| 7         | MY        | Two breeds        | 47,67         | 0,679                 | 0,678           | 0,680        | 20 |
| 7         | FY        | Alpine            | 45,41         | 0,822                 | 0,821           | 0,823        | 21 |
| 7         | PY        | Alpine            | 46,25         | 0,822                 | 0,821           | 0,823        | 22 |
| 8         | PY        | Saanen            | 45,77         | 0,067                 | 0,066           | 0,068        | 23 |
| <b>8</b>  | <b>FC</b> | <b>Two breeds</b> | <b>60,97</b>  | <b>0,189</b>          | <b>0,188</b>    | <b>0,190</b> | 24 |
| <b>8</b>  | <b>FC</b> | <b>Alpine</b>     | <b>68,05</b>  | <b>0,230</b>          | <b>0,228</b>    | <b>0,231</b> | 25 |
| 8         | MY        | Saanen            | 44,37         | 0,491                 | 0,490           | 0,492        | 26 |
| 8         | MY        | Two breeds        | 45,27         | 0,707                 | 0,706           | 0,708        | 27 |
| 8         | PY        | Two breeds        | 45,86         | 0,968                 | 0,967           | 0,969        | 28 |
| 10        | FC        | Alpine            | 49,46         | 0,983                 | 0,981           | 0,984        | 29 |
| 11        | PC        | Alpine            | 46,99         | 0,059                 | 0,058           | 0,060        | 30 |
| 11        | FY        | Two breeds        | 53,51         | 0,440                 | 0,439           | 0,441        | 31 |
| 11        | PY        | Two breeds        | 51,85         | 0,460                 | 0,459           | 0,461        | 32 |
| 11        | PC        | Two breeds        | 49,23         | 1,001                 | 1,000           | 1,003        | 33 |
| 12        | FC        | Two breeds        | 46,48         | 0,087                 | 0,086           | 0,088        | 34 |
| 12        | FY        | Saanen            | 48,98         | 0,150                 | 0,149           | 0,151        | 35 |
| 13        | FY        | Saanen            | 50,10         | 0,784                 | 0,783           | 0,785        | 36 |
| 14        | PC        | Saanen            | 43,04         | 0,099                 | 0,098           | 0,101        | 37 |
| <b>14</b> | <b>FC</b> | <b>Two breeds</b> | <b>172,77</b> | <b>0,109</b>          | <b>0,106</b>    | <b>0,110</b> | 38 |
| <b>14</b> | <b>FC</b> | <b>Saanen</b>     | <b>112,05</b> | <b>0,115</b>          | <b>0,114</b>    | <b>0,116</b> | 39 |
| <b>14</b> | <b>FC</b> | <b>Alpine</b>     | <b>108,35</b> | <b>0,116</b>          | <b>0,114</b>    | <b>0,118</b> | 40 |
| 14        | FY        | Saanen            | 44,72         | 0,147                 | 0,146           | 0,148        | 41 |
| 15        | FY        | Saanen            | 45,08         | 0,298                 | 0,297           | 0,299        | 42 |
| 15        | MY        | Saanen            | 53,19         | 0,544                 | 0,543           | 0,545        | 43 |
| 15        | PY        | Saanen            | 46,49         | 0,544                 | 0,543           | 0,545        | 44 |
| 18        | FC        | Two breeds        | 43,50         | 0,003                 | 0,002           | 0,004        | 45 |

|           |           |               |              |              |              |              |    |
|-----------|-----------|---------------|--------------|--------------|--------------|--------------|----|
| 18        | MY        | Saanen        | 43,67        | 0,217        | 0,216        | 0,218        | 46 |
| 18        | PC        | Alpine        | 43,74        | 0,564        | 0,563        | 0,565        | 47 |
| 19        | FY        | Saanen        | 46,68        | 0,221        | 0,220        | 0,222        | 48 |
| 19        | MY        | Saanen        | 46,42        | 0,246        | 0,245        | 0,248        | 49 |
| <b>19</b> | <b>PY</b> | <b>Saanen</b> | <b>57,34</b> | <b>0,258</b> | <b>0,256</b> | <b>0,260</b> | 50 |
| 19        | PY        | Two breeds    | 54,38        | 0,275        | 0,274        | 0,276        | 51 |
| 20        | PC        | Alpine        | 47,46        | 0,582        | 0,581        | 0,583        | 52 |
| 20        | FC        | Two breeds    | 50,99        | 0,592        | 0,591        | 0,593        | 53 |
| 20        | PY        | Alpine        | 44,88        | 0,629        | 0,628        | 0,630        | 54 |
| 20        | FC        | Alpine        | 49,03        | 0,674        | 0,673        | 0,675        | 55 |
| 21        | MY        | Saanen        | 45,18        | 0,080        | 0,079        | 0,081        | 56 |
| 21        | MY        | Two breeds    | 48,91        | 0,115        | 0,114        | 0,116        | 57 |
| 21        | MY        | Alpine        | 45,59        | 0,115        | 0,113        | 0,116        | 58 |
| 21        | FC        | Alpine        | 46,37        | 0,196        | 0,193        | 0,197        | 59 |
| 21        | PC        | Two breeds    | 44,97        | 0,597        | 0,596        | 0,598        | 60 |
| 22        | PY        | Two breeds    | 45,07        | 0,464        | 0,462        | 0,466        | 61 |
| 22        | PY        | Saanen        | 47,29        | 0,527        | 0,526        | 0,528        | 62 |
| 23        | PC        | Alpine        | 46,04        | 0,099        | 0,098        | 0,100        | 63 |
| 23        | FY        | Two breeds    | 45,34        | 0,217        | 0,216        | 0,218        | 64 |
| 23        | MY        | Alpine        | 56,00        | 0,331        | 0,330        | 0,332        | 65 |
| 23        | PY        | Alpine        | 41,99        | 0,331        | 0,330        | 0,332        | 66 |
| 23        | FC        | Two breeds    | 47,10        | 0,401        | 0,400        | 0,403        | 67 |
| 23        | PC        | Two breeds    | 43,66        | 0,405        | 0,404        | 0,406        | 68 |
| 24        | MY        | Saanen        | 45,26        | 0,036        | 0,035        | 0,037        | 69 |
| 24        | PC        | Saanen        | 42,22        | 0,395        | 0,394        | 0,396        | 70 |
| 25        | MY        | Two breeds    | 43,11        | 0,103        | 0,102        | 0,104        | 71 |
| 25        | PY        | Two breeds    | 43,76        | 0,103        | 0,102        | 0,104        | 72 |
| 25        | PY        | Saanen        | 48,48        | 0,116        | 0,115        | 0,117        | 73 |
| 25        | FC        | Saanen        | 50,35        | 0,154        | 0,153        | 0,155        | 74 |
| 26        | PC        | Alpine        | 41,31        | 0,062        | 0,061        | 0,064        | 75 |
| 26        | FC        | Alpine        | 41,35        | 0,164        | 0,163        | 0,165        | 76 |
| 26        | PC        | Saanen        | 45,11        | 0,243        | 0,242        | 0,244        | 77 |
| 27        | PC        | Alpine        | 45,06        | 0,058        | 0,057        | 0,059        | 78 |
| 27        | FY        | Alpine        | 48,31        | 0,317        | 0,316        | 0,318        | 79 |
| 27        | FC        | Two breeds    | 52,17        | 0,368        | 0,367        | 0,369        | 80 |
| 27        | MY        | Alpine        | 41,93        | 0,404        | 0,402        | 0,405        | 81 |
| 28        | FC        | Two breeds    | 44,09        | 0,042        | 0,041        | 0,043        | 82 |
| 29        | MY        | Alpine        | 47,20        | 0,348        | 0,346        | 0,348        | 83 |
| 29        | PC        | Alpine        | 46,08        | 0,348        | 0,346        | 0,348        | 84 |
| 29        | PC        | Two breeds    | 44,67        | 0,388        | 0,385        | 0,388        | 85 |

S1 Fig

### Two Breeds

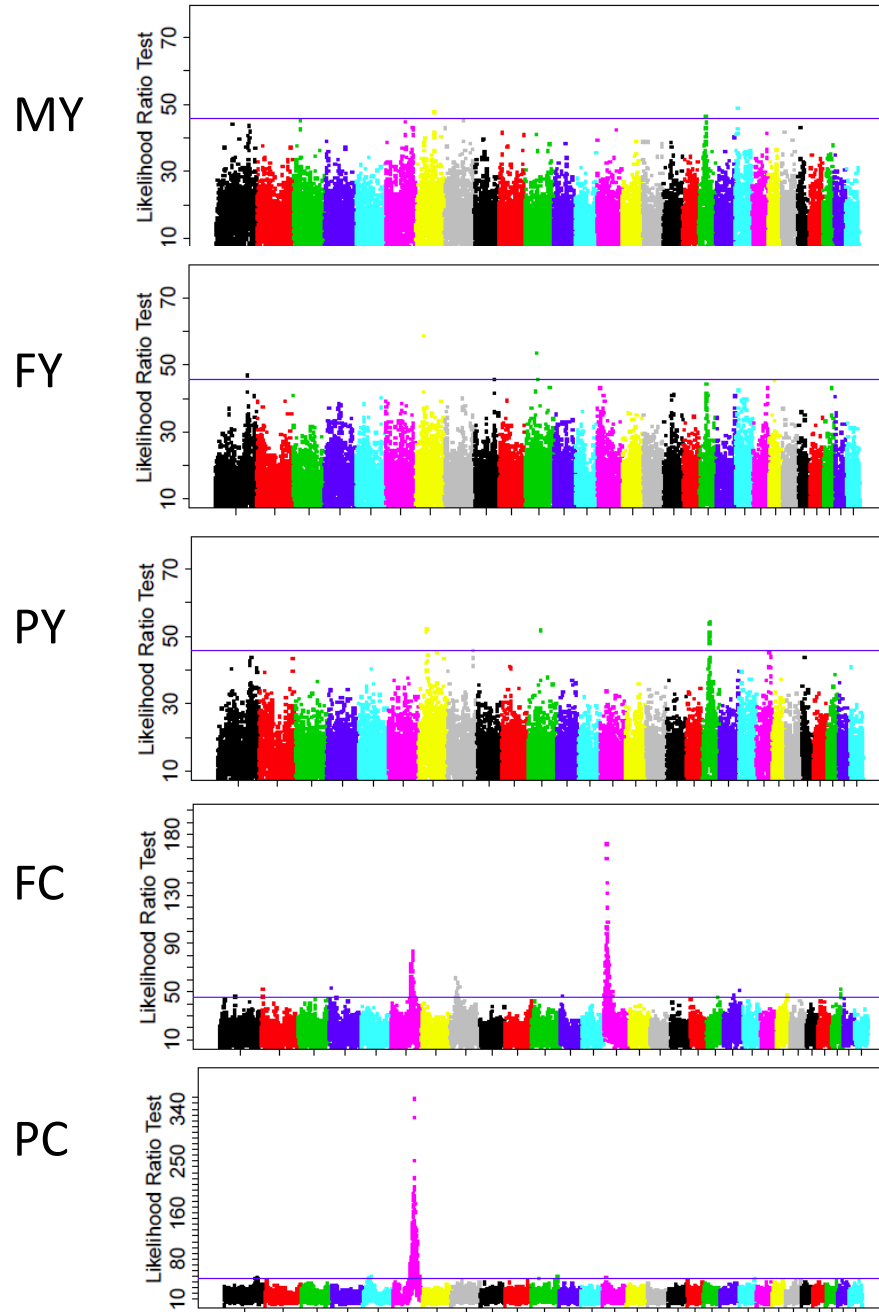

S2 Table

| CHI | position (x100Mb) | LRT_MY | LRT_FY | LRT_PY | LRT_FC | LRT_PC |
|-----|-------------------|--------|--------|--------|--------|--------|
| 1   | 0.0005            | 0.000  | 0.000  | 0.000  | 0.000  | 0.000  |
| 1   | 0.0015            | 12.794 | 15.465 | 7.730  | 18.188 | 18.923 |
| 1   | 0.0025            | 12.258 | 17.044 | 12.745 | 27.020 | 22.763 |
| 1   | 0.0035            | 19.902 | 22.441 | 17.938 | 28.432 | 10.927 |
| 1   | 0.0045            | 10.166 | 12.248 | 8.271  | 16.609 | 16.692 |
| 1   | 0.0055            | 7.404  | 16.194 | 11.877 | 15.139 | 20.401 |
| 1   | 0.0065            | 5.168  | 9.583  | 2.631  | 23.268 | 16.272 |
| 1   | 0.0075            | 10.250 | 21.016 | 14.009 | 19.131 | 14.826 |
| 1   | 0.0085            | 11.803 | 10.569 | 8.082  | 16.840 | 21.786 |
| 1   | 0.0095            | 7.035  | 6.915  | 5.193  | 14.178 | 12.378 |
| 1   | 0.0105            | 6.978  | 9.155  | 4.138  | 18.545 | 15.241 |
| 1   | 0.0115            | 12.354 | 18.481 | 14.506 | 25.044 | 22.841 |
| 1   | 0.0125            | 14.033 | 8.227  | 7.862  | 12.707 | 15.408 |
| 1   | 0.0135            | 8.255  | 7.537  | 3.934  | 5.729  | 7.093  |
| 1   | 0.0145            | 8.390  | 10.090 | 6.744  | 13.562 | 11.057 |
| 1   | 0.0155            | 9.290  | 9.099  | 6.949  | 9.916  | 5.067  |
| 1   | 0.0165            | 11.239 | 12.278 | 9.567  | 12.154 | 18.435 |
| 1   | 0.0175            | 8.727  | 13.025 | 7.064  | 13.244 | 13.709 |
| 1   | 0.0185            | 11.784 | 14.226 | 11.801 | 14.756 | 12.664 |
| 1   | 0.0195            | 8.257  | 10.835 | 5.559  | 26.380 | 11.843 |
| 1   | 0.0205            | 6.849  | 7.455  | 5.971  | 23.449 | 15.554 |
| 1   | 0.0215            | 6.679  | 8.811  | 3.413  | 9.011  | 5.147  |
| 1   | 0.0225            | 4.650  | 7.348  | 6.479  | 12.263 | 13.171 |
| 1   | 0.0235            | 4.532  | 3.823  | 4.777  | 16.686 | 18.183 |
| 1   | 0.0245            | 8.053  | 8.634  | 7.546  | 9.821  | 6.060  |
| 1   | 0.0255            | 5.145  | 9.463  | 6.687  | 8.293  | 10.988 |
| 1   | 0.0265            | 5.940  | 7.967  | 4.483  | 16.464 | 7.705  |
| 1   | 0.0275            | 8.477  | 4.651  | 3.121  | 9.506  | 9.302  |
| 1   | 0.0285            | 7.729  | 4.158  | 6.100  | 8.769  | 8.379  |
| 1   | 0.0295            | 10.796 | 9.353  | 9.164  | 8.515  | 11.223 |
| 1   | 0.0305            | 19.069 | 15.824 | 13.244 | 9.668  | 12.204 |
| 1   | 0.0315            | 9.361  | 9.407  | 7.931  | 6.756  | 11.210 |
| 1   | 0.0325            | 14.653 | 12.363 | 11.697 | 12.723 | 16.813 |
| 1   | 0.0335            | 12.385 | 12.283 | 9.570  | 13.414 | 12.381 |
| 1   | 0.0345            | 8.319  | 10.696 | 8.364  | 9.879  | 7.475  |
| 1   | 0.0355            | 10.383 | 9.230  | 6.801  | 16.604 | 19.443 |
| 1   | 0.0365            | 13.683 | 12.894 | 8.339  | 7.383  | 6.353  |
| 1   | 0.0375            | 12.836 | 7.858  | 7.793  | 5.622  | 9.506  |
| 1   | 0.0385            | 23.228 | 13.504 | 15.312 | 13.681 | 8.591  |
| 1   | 0.0395            | 10.128 | 8.976  | 4.606  | 16.745 | 6.857  |
| 1   | 0.0405            | 21.391 | 15.374 | 10.661 | 10.433 | 14.143 |
| 1   | 0.0415            | 14.944 | 14.107 | 11.571 | 16.798 | 15.026 |
| 1   | 0.0425            | 14.833 | 13.964 | 11.433 | 16.506 | 14.962 |
| 1   | 0.0435            | 8.180  | 12.965 | 4.742  | 19.384 | 13.667 |
| 1   | 0.0445            | 15.336 | 11.731 | 8.652  | 23.305 | 18.140 |
| 1   | 0.0455            | 15.261 | 11.598 | 8.478  | 23.817 | 18.298 |
| 1   | 0.0465            | 16.584 | 23.407 | 11.377 | 24.166 | 11.702 |

|   |        |        |        |        |        |        |
|---|--------|--------|--------|--------|--------|--------|
| 1 | 0.0475 | 7.228  | 9.176  | 5.325  | 24.131 | 18.886 |
| 1 | 0.0485 | 13.468 | 11.000 | 7.627  | 21.781 | 19.346 |
| 1 | 0.0495 | 8.095  | 8.715  | 6.929  | 5.102  | 11.554 |
| 1 | 0.0505 | 9.134  | 12.189 | 3.891  | 5.127  | 11.717 |
| 1 | 0.0515 | 10.531 | 6.597  | 2.712  | 16.576 | 22.649 |
| 1 | 0.0525 | 8.045  | 5.847  | 2.778  | 10.598 | 19.448 |
| 1 | 0.0535 | 11.308 | 11.797 | 8.074  | 9.870  | 9.563  |
| 1 | 0.0545 | 9.063  | 5.897  | 4.848  | 7.721  | 19.160 |
| 1 | 0.0555 | 8.488  | 9.636  | 10.520 | 10.449 | 23.593 |
| 1 | 0.0565 | 11.491 | 8.516  | 7.135  | 14.274 | 22.949 |
| 1 | 0.0575 | 7.224  | 6.624  | 4.120  | 13.097 | 15.220 |
| 1 | 0.0585 | 9.085  | 8.991  | 6.895  | 12.731 | 11.977 |
| 1 | 0.0595 | 9.659  | 15.190 | 11.321 | 15.853 | 14.306 |
| 1 | 0.0605 | 12.200 | 18.439 | 9.964  | 16.871 | 10.261 |
| 1 | 0.0615 | 15.242 | 19.614 | 15.079 | 15.172 | 8.860  |
| 1 | 0.0625 | 17.334 | 17.186 | 11.396 | 14.045 | 13.619 |
| 1 | 0.0635 | 13.855 | 8.417  | 14.620 | 5.013  | 13.428 |
| 1 | 0.0645 | 11.124 | 8.472  | 11.892 | 9.682  | 9.720  |
| 1 | 0.0655 | 11.710 | 15.607 | 10.808 | 20.770 | 14.299 |
| 1 | 0.0665 | 8.021  | 9.759  | 8.106  | 20.837 | 19.935 |
| 1 | 0.0675 | 10.260 | 4.367  | 6.723  | 15.286 | 13.894 |
| 1 | 0.0685 | 12.600 | 7.565  | 8.730  | 15.804 | 13.686 |
| 1 | 0.0695 | 6.362  | 6.581  | 4.620  | 27.271 | 29.443 |
| 1 | 0.0705 | 7.139  | 2.398  | 6.967  | 16.754 | 22.818 |
| 1 | 0.0715 | 13.149 | 9.426  | 13.633 | 18.726 | 31.791 |
| 1 | 0.0725 | 10.095 | 10.679 | 13.107 | 18.239 | 22.206 |
| 1 | 0.0735 | 5.836  | 7.652  | 6.280  | 26.757 | 21.815 |
| 1 | 0.0745 | 4.750  | 8.008  | 2.463  | 28.312 | 21.605 |
| 1 | 0.0755 | 6.364  | 9.782  | 6.354  | 16.840 | 13.502 |
| 1 | 0.0765 | 14.759 | 8.764  | 14.686 | 18.235 | 25.616 |
| 1 | 0.0775 | 11.333 | 14.417 | 12.362 | 19.821 | 22.420 |
| 1 | 0.0785 | 12.440 | 16.920 | 19.238 | 14.619 | 28.985 |
| 1 | 0.0795 | 17.838 | 20.993 | 18.044 | 17.866 | 34.350 |
| 1 | 0.0805 | 7.860  | 5.639  | 5.242  | 18.235 | 28.810 |
| 1 | 0.0815 | 14.506 | 9.451  | 8.170  | 21.624 | 15.779 |
| 1 | 0.0825 | 7.054  | 14.159 | 9.547  | 21.324 | 11.354 |
| 1 | 0.0835 | 12.538 | 17.167 | 13.693 | 29.059 | 20.261 |
| 1 | 0.0845 | 6.463  | 1.880  | 4.658  | 7.143  | 18.743 |
| 1 | 0.0855 | 8.844  | 3.754  | 6.129  | 9.695  | 13.787 |
| 1 | 0.0865 | 11.071 | 11.554 | 12.111 | 12.451 | 15.244 |
| 1 | 0.0875 | 8.070  | 9.319  | 8.145  | 10.195 | 8.693  |
| 1 | 0.0885 | 3.935  | 6.416  | 4.746  | 15.723 | 10.493 |
| 1 | 0.0895 | 11.108 | 9.938  | 13.077 | 19.356 | 24.563 |
| 1 | 0.0905 | 15.003 | 7.807  | 12.222 | 26.853 | 34.215 |
| 1 | 0.0915 | 7.592  | 9.093  | 6.054  | 24.543 | 18.868 |
| 1 | 0.0925 | 9.865  | 10.917 | 8.298  | 18.944 | 11.955 |
| 1 | 0.0935 | 14.919 | 20.637 | 16.691 | 18.574 | 10.052 |
| 1 | 0.0945 | 9.300  | 16.545 | 12.201 | 19.790 | 9.936  |
| 1 | 0.0955 | 9.994  | 11.758 | 7.173  | 15.680 | 4.847  |
| 1 | 0.0965 | 8.928  | 11.497 | 6.656  | 18.669 | 13.340 |



|   |        |        |        |        |        |        |
|---|--------|--------|--------|--------|--------|--------|
| 1 | 0.0975 | 12.073 | 9.896  | 12.430 | 16.902 | 19.724 |
| 1 | 0.0985 | 12.308 | 13.790 | 11.032 | 15.197 | 12.937 |
| 1 | 0.0995 | 15.064 | 15.016 | 12.524 | 19.457 | 27.459 |
| 1 | 0.1005 | 13.793 | 11.318 | 11.051 | 8.212  | 15.622 |
| 1 | 0.1015 | 10.795 | 9.416  | 8.399  | 10.455 | 8.664  |
| 1 | 0.1025 | 5.653  | 11.867 | 5.506  | 18.706 | 12.343 |
| 1 | 0.1035 | 8.565  | 8.324  | 6.705  | 24.106 | 10.842 |
| 1 | 0.1045 | 11.999 | 13.242 | 13.792 | 11.835 | 9.447  |
| 1 | 0.1055 | 15.219 | 12.585 | 12.880 | 9.664  | 12.416 |
| 1 | 0.1065 | 10.936 | 8.954  | 9.683  | 13.111 | 11.877 |
| 1 | 0.1075 | 7.665  | 3.404  | 6.860  | 14.756 | 10.977 |
| 1 | 0.1085 | 3.852  | 3.218  | 4.897  | 8.034  | 15.379 |
| 1 | 0.1095 | 6.714  | 6.064  | 7.898  | 8.789  | 19.866 |
| 1 | 0.1105 | 18.471 | 17.110 | 15.394 | 18.730 | 19.427 |
| 1 | 0.1115 | 16.709 | 12.632 | 9.395  | 8.665  | 15.758 |
| 1 | 0.1125 | 16.263 | 10.452 | 8.724  | 26.516 | 25.508 |
| 1 | 0.1135 | 20.186 | 13.589 | 12.358 | 26.340 | 15.916 |
| 1 | 0.1145 | 15.441 | 9.189  | 11.582 | 15.652 | 17.650 |
| 1 | 0.1155 | 10.382 | 18.477 | 12.475 | 28.791 | 15.109 |
| 1 | 0.1165 | 9.487  | 14.960 | 6.872  | 24.675 | 13.320 |
| 1 | 0.1175 | 12.470 | 10.019 | 11.941 | 14.402 | 11.184 |
| 1 | 0.1185 | 16.134 | 16.970 | 12.201 | 20.943 | 6.479  |
| 1 | 0.1195 | 16.164 | 17.074 | 12.191 | 20.859 | 6.560  |
| 1 | 0.1205 | 18.709 | 13.048 | 12.560 | 20.171 | 15.755 |
| 1 | 0.1215 | 12.710 | 12.787 | 12.146 | 21.164 | 20.909 |
| 1 | 0.1225 | 21.796 | 11.142 | 13.066 | 24.227 | 8.533  |
| 1 | 0.1235 | 14.684 | 12.922 | 14.974 | 11.935 | 10.534 |
| 1 | 0.1245 | 14.618 | 11.680 | 14.098 | 17.481 | 11.257 |
| 1 | 0.1255 | 5.409  | 3.212  | 4.689  | 22.435 | 14.091 |
| 1 | 0.1265 | 19.066 | 17.391 | 13.239 | 22.871 | 19.678 |
| 1 | 0.1275 | 13.672 | 14.461 | 11.895 | 19.726 | 11.638 |
| 1 | 0.1285 | 15.995 | 14.542 | 10.247 | 24.917 | 14.557 |
| 1 | 0.1295 | 14.121 | 8.820  | 6.257  | 9.669  | 19.343 |
| 1 | 0.1305 | 7.304  | 9.879  | 5.054  | 9.912  | 9.676  |
| 1 | 0.1315 | 11.441 | 26.976 | 11.592 | 40.627 | 9.363  |
| 1 | 0.1325 | 16.122 | 16.288 | 16.042 | 21.133 | 8.857  |
| 1 | 0.1335 | 11.621 | 7.873  | 5.169  | 15.140 | 4.239  |
| 1 | 0.1345 | 8.728  | 7.590  | 5.272  | 27.822 | 7.641  |
| 1 | 0.1355 | 13.309 | 9.512  | 8.935  | 34.719 | 13.870 |
| 1 | 0.1365 | 13.971 | 12.688 | 13.411 | 12.898 | 34.199 |
| 1 | 0.1375 | 12.367 | 13.328 | 10.676 | 20.292 | 14.698 |
| 1 | 0.1385 | 15.181 | 16.494 | 13.411 | 17.149 | 14.062 |
| 1 | 0.1395 | 22.448 | 19.543 | 13.482 | 18.997 | 11.698 |
| 1 | 0.1405 | 18.262 | 18.725 | 17.459 | 22.714 | 17.929 |
| 1 | 0.1415 | 9.559  | 20.815 | 8.231  | 33.727 | 16.379 |
| 1 | 0.1425 | 13.394 | 16.651 | 6.882  | 16.500 | 8.724  |
| 1 | 0.1435 | 7.209  | 13.505 | 10.171 | 12.509 | 14.438 |
| 1 | 0.1445 | 9.554  | 19.613 | 12.804 | 20.928 | 9.382  |
| 1 | 0.1455 | 23.598 | 22.795 | 16.272 | 31.364 | 19.063 |
| 1 | 0.1465 | 19.456 | 13.709 | 11.653 | 32.049 | 23.850 |

|   |        |        |        |        |        |        |
|---|--------|--------|--------|--------|--------|--------|
| 1 | 0.1475 | 9.622  | 11.442 | 11.031 | 13.191 | 13.288 |
| 1 | 0.1485 | 7.936  | 15.153 | 8.611  | 19.089 | 13.383 |
| 1 | 0.1495 | 23.880 | 19.927 | 14.714 | 17.562 | 22.424 |
| 1 | 0.1505 | 30.817 | 31.743 | 21.239 | 37.518 | 28.553 |
| 1 | 0.1515 | 9.433  | 19.720 | 10.035 | 32.536 | 20.232 |
| 1 | 0.1525 | 12.822 | 24.436 | 13.202 | 43.004 | 22.287 |
| 1 | 0.1535 | 14.604 | 20.891 | 15.178 | 38.842 | 23.909 |
| 1 | 0.1545 | 19.960 | 16.007 | 12.310 | 7.316  | 6.416  |
| 1 | 0.1555 | 18.680 | 22.183 | 15.098 | 22.267 | 8.727  |
| 1 | 0.1565 | 17.287 | 14.205 | 7.649  | 14.742 | 11.708 |
| 1 | 0.1575 | 24.436 | 15.640 | 24.272 | 7.991  | 21.252 |
| 1 | 0.1585 | 36.213 | 28.949 | 26.918 | 24.090 | 29.611 |
| 1 | 0.1595 | 9.733  | 8.475  | 5.059  | 16.488 | 20.683 |
| 1 | 0.1605 | 6.068  | 12.583 | 5.378  | 14.110 | 11.926 |
| 1 | 0.1615 | 7.373  | 9.199  | 6.034  | 19.636 | 10.175 |
| 1 | 0.1625 | 21.616 | 17.286 | 13.220 | 29.019 | 19.782 |
| 1 | 0.1635 | 18.786 | 11.899 | 12.958 | 25.510 | 18.459 |
| 1 | 0.1645 | 13.732 | 11.349 | 12.173 | 15.767 | 20.548 |
| 1 | 0.1655 | 23.830 | 19.683 | 15.922 | 24.787 | 18.738 |
| 1 | 0.1665 | 22.779 | 20.374 | 12.565 | 30.380 | 23.473 |
| 1 | 0.1675 | 22.690 | 20.221 | 12.607 | 30.383 | 23.480 |
| 1 | 0.1685 | 16.010 | 11.886 | 7.990  | 24.483 | 15.400 |
| 1 | 0.1695 | 12.380 | 7.823  | 8.402  | 24.395 | 10.074 |
| 1 | 0.1705 | 15.241 | 15.968 | 7.429  | 44.342 | 16.598 |
| 1 | 0.1715 | 12.719 | 12.828 | 8.592  | 21.229 | 17.591 |
| 1 | 0.1725 | 18.516 | 13.611 | 14.997 | 20.248 | 22.308 |
| 1 | 0.1735 | 20.943 | 7.698  | 13.288 | 10.847 | 8.330  |
| 1 | 0.1745 | 13.558 | 12.366 | 9.101  | 21.827 | 13.392 |
| 1 | 0.1755 | 17.378 | 18.847 | 12.027 | 29.833 | 22.544 |
| 1 | 0.1765 | 10.767 | 13.995 | 10.245 | 21.296 | 14.050 |
| 1 | 0.1775 | 10.810 | 13.929 | 10.278 | 21.263 | 14.058 |
| 1 | 0.1785 | 9.148  | 13.245 | 11.458 | 13.864 | 5.684  |
| 1 | 0.1795 | 5.030  | 5.698  | 5.022  | 8.652  | 6.206  |
| 1 | 0.1805 | 8.732  | 13.469 | 6.927  | 17.641 | 7.207  |
| 1 | 0.1815 | 11.140 | 22.354 | 8.335  | 32.506 | 9.163  |
| 1 | 0.1825 | 19.697 | 13.277 | 12.981 | 15.947 | 6.301  |
| 1 | 0.1835 | 26.646 | 18.685 | 19.136 | 21.174 | 17.185 |
| 1 | 0.1845 | 36.863 | 23.822 | 24.776 | 23.258 | 16.076 |
| 1 | 0.1855 | 20.116 | 7.649  | 9.799  | 17.978 | 20.500 |
| 1 | 0.1865 | 19.403 | 18.096 | 17.064 | 35.786 | 21.621 |
| 1 | 0.1875 | 20.371 | 20.156 | 21.482 | 17.382 | 12.103 |
| 1 | 0.1885 | 18.956 | 14.497 | 18.221 | 13.937 | 12.087 |
| 1 | 0.1895 | 14.541 | 7.731  | 6.602  | 15.017 | 11.635 |
| 1 | 0.1905 | 11.563 | 7.643  | 6.870  | 21.717 | 17.251 |
| 1 | 0.1915 | 9.233  | 19.738 | 8.748  | 38.257 | 22.479 |
| 1 | 0.1925 | 8.820  | 11.009 | 7.015  | 17.949 | 6.489  |
| 1 | 0.1935 | 15.256 | 18.848 | 12.837 | 31.929 | 14.576 |
| 1 | 0.1945 | 14.531 | 20.194 | 11.640 | 41.921 | 20.911 |
| 1 | 0.1955 | 7.619  | 15.477 | 7.858  | 20.626 | 11.804 |
| 1 | 0.1965 | 11.181 | 14.986 | 6.878  | 22.182 | 15.832 |

|   |        |        |        |        |        |        |
|---|--------|--------|--------|--------|--------|--------|
| 1 | 0.1975 | 13.029 | 16.278 | 10.883 | 24.898 | 21.595 |
| 1 | 0.1985 | 11.986 | 15.370 | 12.901 | 21.164 | 17.971 |
| 1 | 0.1995 | 14.938 | 19.815 | 15.972 | 20.740 | 11.681 |
| 1 | 0.2005 | 17.047 | 21.290 | 17.724 | 29.953 | 12.508 |
| 1 | 0.2015 | 30.889 | 21.133 | 27.962 | 36.489 | 19.959 |
| 1 | 0.2025 | 6.256  | 13.363 | 9.186  | 18.104 | 11.190 |
| 1 | 0.2035 | 16.799 | 14.283 | 15.128 | 11.856 | 17.940 |
| 1 | 0.2045 | 5.912  | 6.666  | 8.988  | 17.530 | 14.406 |
| 1 | 0.2055 | 7.061  | 4.453  | 5.449  | 23.606 | 22.950 |
| 1 | 0.2065 | 22.437 | 11.341 | 18.375 | 28.035 | 16.161 |
| 1 | 0.2075 | 17.411 | 10.852 | 11.345 | 28.481 | 17.148 |
| 1 | 0.2085 | 17.308 | 10.809 | 11.325 | 28.471 | 17.115 |
| 1 | 0.2095 | 10.002 | 6.413  | 6.141  | 14.273 | 28.584 |
| 1 | 0.2105 | 7.868  | 9.618  | 11.950 | 19.885 | 14.393 |
| 1 | 0.2115 | 13.490 | 18.188 | 11.519 | 23.829 | 10.909 |
| 1 | 0.2125 | 14.394 | 9.177  | 8.956  | 17.477 | 13.813 |
| 1 | 0.2135 | 14.317 | 9.117  | 8.956  | 17.423 | 13.899 |
| 1 | 0.2145 | 10.258 | 7.076  | 8.485  | 21.161 | 13.052 |
| 1 | 0.2155 | 13.779 | 14.109 | 11.143 | 19.824 | 18.252 |
| 1 | 0.2165 | 15.192 | 15.599 | 18.047 | 22.868 | 14.012 |
| 1 | 0.2175 | 11.997 | 12.024 | 9.026  | 16.386 | 15.875 |
| 1 | 0.2185 | 14.803 | 9.036  | 6.017  | 26.083 | 12.650 |
| 1 | 0.2195 | 18.737 | 8.869  | 7.799  | 27.472 | 15.685 |
| 1 | 0.2205 | 22.963 | 22.728 | 26.134 | 17.105 | 23.637 |
| 1 | 0.2215 | 22.994 | 22.734 | 26.137 | 17.081 | 23.663 |
| 1 | 0.2225 | 5.881  | 12.407 | 6.524  | 11.650 | 5.090  |
| 1 | 0.2235 | 9.902  | 12.146 | 9.783  | 11.893 | 6.698  |
| 1 | 0.2245 | 16.849 | 7.961  | 12.319 | 19.362 | 6.503  |
| 1 | 0.2255 | 18.051 | 12.401 | 10.892 | 14.392 | 21.268 |
| 1 | 0.2265 | 19.753 | 12.424 | 23.370 | 12.556 | 22.650 |
| 1 | 0.2275 | 17.098 | 13.480 | 17.469 | 33.873 | 23.119 |
| 1 | 0.2285 | 10.799 | 11.095 | 8.841  | 23.833 | 21.769 |
| 1 | 0.2295 | 14.771 | 11.665 | 13.243 | 36.491 | 27.615 |
| 1 | 0.2305 | 10.452 | 8.084  | 8.238  | 30.071 | 19.955 |
| 1 | 0.2315 | 14.522 | 9.801  | 10.562 | 35.262 | 25.786 |
| 1 | 0.2325 | 11.988 | 12.684 | 11.443 | 29.192 | 22.304 |
| 1 | 0.2335 | 20.124 | 14.569 | 9.969  | 41.605 | 37.121 |
| 1 | 0.2345 | 18.690 | 15.237 | 10.534 | 33.992 | 26.696 |
| 1 | 0.2355 | 19.047 | 12.085 | 12.268 | 19.531 | 21.318 |
| 1 | 0.2365 | 14.465 | 8.182  | 13.516 | 18.923 | 12.469 |
| 1 | 0.2375 | 12.745 | 12.170 | 10.390 | 25.908 | 16.938 |
| 1 | 0.2385 | 4.971  | 3.945  | 3.711  | 19.671 | 10.773 |
| 1 | 0.2395 | 14.467 | 6.006  | 7.448  | 24.708 | 18.821 |
| 1 | 0.2405 | 16.922 | 15.474 | 11.224 | 26.214 | 14.961 |
| 1 | 0.2415 | 10.421 | 7.822  | 11.221 | 28.774 | 21.486 |
| 1 | 0.2425 | 21.441 | 18.254 | 15.467 | 35.188 | 13.949 |
| 1 | 0.2435 | 10.448 | 11.449 | 9.477  | 35.146 | 10.488 |
| 1 | 0.2445 | 19.582 | 14.268 | 14.484 | 19.297 | 9.274  |
| 1 | 0.2455 | 19.693 | 14.107 | 8.918  | 11.497 | 17.132 |
| 1 | 0.2465 | 20.177 | 9.852  | 11.414 | 12.205 | 14.179 |

|   |        |        |        |        |        |        |
|---|--------|--------|--------|--------|--------|--------|
| 1 | 0.2475 | 19.642 | 17.673 | 17.284 | 18.326 | 13.834 |
| 1 | 0.2485 | 24.780 | 15.535 | 13.092 | 25.114 | 15.608 |
| 1 | 0.2495 | 28.593 | 18.029 | 18.208 | 35.365 | 19.945 |
| 1 | 0.2505 | 12.914 | 5.852  | 9.746  | 11.713 | 16.528 |
| 1 | 0.2515 | 9.086  | 9.291  | 8.443  | 18.820 | 19.000 |
| 1 | 0.2525 | 14.995 | 13.640 | 14.162 | 16.643 | 12.590 |
| 1 | 0.2535 | 6.805  | 8.778  | 8.509  | 18.442 | 7.477  |
| 1 | 0.2545 | 11.240 | 12.317 | 12.055 | 17.144 | 18.307 |
| 1 | 0.2555 | 14.623 | 12.427 | 9.194  | 21.231 | 17.574 |
| 1 | 0.2565 | 10.986 | 4.186  | 6.378  | 17.904 | 8.051  |
| 1 | 0.2575 | 23.070 | 12.438 | 14.720 | 10.826 | 17.532 |
| 1 | 0.2585 | 26.269 | 11.741 | 10.269 | 24.757 | 20.830 |
| 1 | 0.2595 | 16.717 | 8.619  | 13.083 | 21.163 | 32.835 |
| 1 | 0.2605 | 17.986 | 12.522 | 14.556 | 12.752 | 18.653 |
| 1 | 0.2615 | 23.081 | 12.134 | 13.161 | 24.884 | 13.658 |
| 1 | 0.2625 | 19.599 | 2.833  | 5.728  | 19.860 | 26.895 |
| 1 | 0.2635 | 5.714  | 2.430  | 1.437  | 11.541 | 12.784 |
| 1 | 0.2645 | 14.233 | 10.102 | 11.391 | 19.609 | 13.872 |
| 1 | 0.2655 | 16.900 | 10.585 | 9.072  | 22.127 | 11.996 |
| 1 | 0.2665 | 9.043  | 6.630  | 9.128  | 17.931 | 18.218 |
| 1 | 0.2675 | 10.186 | 6.563  | 12.746 | 21.092 | 18.054 |
| 1 | 0.2685 | 15.171 | 6.872  | 10.572 | 21.301 | 21.471 |
| 1 | 0.2695 | 10.462 | 9.814  | 8.958  | 20.622 | 13.442 |
| 1 | 0.2705 | 7.793  | 5.695  | 9.810  | 17.716 | 9.479  |
| 1 | 0.2715 | 23.796 | 14.189 | 20.894 | 8.895  | 11.148 |
| 1 | 0.2725 | 19.987 | 19.193 | 24.055 | 17.185 | 16.924 |
| 1 | 0.2735 | 12.983 | 8.059  | 9.789  | 19.830 | 21.940 |
| 1 | 0.2745 | 12.973 | 5.502  | 9.066  | 7.875  | 14.985 |
| 1 | 0.2755 | 20.652 | 12.052 | 18.953 | 22.724 | 14.960 |
| 1 | 0.2765 | 17.977 | 9.283  | 8.855  | 18.388 | 10.924 |
| 1 | 0.2775 | 10.670 | 10.110 | 11.471 | 16.284 | 10.139 |
| 1 | 0.2785 | 6.555  | 7.251  | 9.362  | 9.973  | 8.686  |
| 1 | 0.2795 | 17.807 | 12.854 | 18.605 | 14.378 | 9.256  |
| 1 | 0.2805 | 19.736 | 7.962  | 14.106 | 6.390  | 15.155 |
| 1 | 0.2815 | 17.313 | 8.158  | 8.466  | 7.995  | 14.794 |
| 1 | 0.2825 | 11.142 | 3.217  | 9.821  | 13.288 | 13.238 |
| 1 | 0.2835 | 13.017 | 5.861  | 10.173 | 13.476 | 16.887 |
| 1 | 0.2845 | 18.038 | 15.449 | 16.953 | 15.409 | 11.707 |
| 1 | 0.2855 | 9.673  | 7.486  | 10.842 | 17.670 | 13.489 |
| 1 | 0.2865 | 30.278 | 14.669 | 30.728 | 20.536 | 13.599 |
| 1 | 0.2875 | 30.737 | 13.529 | 27.471 | 17.237 | 13.245 |
| 1 | 0.2885 | 19.420 | 19.589 | 20.289 | 16.270 | 21.461 |
| 1 | 0.2895 | 5.991  | 9.509  | 10.670 | 24.582 | 16.403 |
| 1 | 0.2905 | 7.327  | 11.366 | 6.375  | 19.040 | 14.529 |
| 1 | 0.2915 | 6.375  | 8.224  | 6.859  | 21.559 | 14.170 |
| 1 | 0.2925 | 16.405 | 16.650 | 21.257 | 19.911 | 11.637 |
| 1 | 0.2935 | 12.117 | 13.768 | 15.960 | 25.617 | 19.591 |
| 1 | 0.2945 | 16.999 | 9.635  | 15.978 | 18.985 | 18.997 |
| 1 | 0.2955 | 11.521 | 4.741  | 9.858  | 23.247 | 17.586 |
| 1 | 0.2965 | 4.989  | 6.821  | 11.727 | 19.165 | 12.813 |

|   |        |        |        |        |        |        |
|---|--------|--------|--------|--------|--------|--------|
| 1 | 0.2975 | 22.209 | 15.992 | 18.052 | 21.032 | 14.511 |
| 1 | 0.2985 | 13.892 | 19.221 | 15.366 | 33.081 | 12.648 |
| 1 | 0.2995 | 19.993 | 22.745 | 21.801 | 29.607 | 21.035 |
| 1 | 0.3005 | 7.809  | 9.082  | 11.075 | 7.879  | 6.199  |
| 1 | 0.3015 | 30.837 | 17.463 | 28.195 | 10.259 | 9.097  |
| 1 | 0.3025 | 14.376 | 8.459  | 10.645 | 6.326  | 19.501 |
| 1 | 0.3035 | 6.563  | 10.139 | 9.695  | 17.292 | 16.334 |
| 1 | 0.3045 | 12.789 | 9.916  | 9.619  | 23.037 | 9.845  |
| 1 | 0.3055 | 9.897  | 8.850  | 6.546  | 25.104 | 18.905 |
| 1 | 0.3065 | 15.220 | 11.956 | 18.938 | 8.878  | 12.228 |
| 1 | 0.3075 | 12.911 | 8.831  | 12.501 | 19.623 | 17.026 |
| 1 | 0.3085 | 13.375 | 9.612  | 10.659 | 12.492 | 15.286 |
| 1 | 0.3095 | 13.363 | 9.607  | 10.649 | 12.499 | 15.278 |
| 1 | 0.3105 | 17.229 | 18.785 | 20.530 | 12.146 | 17.269 |
| 1 | 0.3115 | 26.059 | 23.839 | 27.210 | 26.325 | 15.882 |
| 1 | 0.3125 | 13.546 | 12.818 | 15.761 | 22.233 | 14.655 |
| 1 | 0.3135 | 12.993 | 18.224 | 13.774 | 26.181 | 25.519 |
| 1 | 0.3145 | 12.762 | 5.637  | 9.776  | 18.917 | 9.045  |
| 1 | 0.3155 | 14.542 | 9.693  | 15.897 | 7.193  | 6.979  |
| 1 | 0.3165 | 24.253 | 16.390 | 25.390 | 18.145 | 12.825 |
| 1 | 0.3175 | 13.782 | 8.652  | 15.944 | 12.644 | 8.439  |
| 1 | 0.3185 | 15.777 | 9.341  | 19.525 | 7.832  | 10.799 |
| 1 | 0.3195 | 6.743  | 5.226  | 9.623  | 7.458  | 15.005 |
| 1 | 0.3205 | 14.967 | 14.190 | 19.141 | 14.759 | 17.592 |
| 1 | 0.3215 | 15.163 | 14.008 | 15.912 | 14.440 | 13.862 |
| 1 | 0.3225 | 8.444  | 11.565 | 12.304 | 4.499  | 10.714 |
| 1 | 0.3235 | 10.237 | 14.468 | 13.599 | 24.818 | 14.562 |
| 1 | 0.3245 | 19.244 | 12.220 | 15.641 | 27.634 | 23.387 |
| 1 | 0.3255 | 22.458 | 24.650 | 24.005 | 31.153 | 18.127 |
| 1 | 0.3265 | 27.122 | 12.411 | 21.149 | 24.478 | 12.703 |
| 1 | 0.3275 | 30.170 | 12.969 | 18.029 | 22.238 | 12.567 |
| 1 | 0.3285 | 26.833 | 6.335  | 16.831 | 16.650 | 17.877 |
| 1 | 0.3295 | 20.935 | 8.579  | 16.028 | 15.881 | 16.775 |
| 1 | 0.3305 | 18.341 | 16.331 | 14.506 | 26.326 | 16.361 |
| 1 | 0.3315 | 17.694 | 13.730 | 15.672 | 24.443 | 18.502 |
| 1 | 0.3325 | 37.628 | 14.207 | 29.414 | 29.687 | 15.573 |
| 1 | 0.3335 | 13.181 | 5.329  | 10.211 | 16.062 | 13.548 |
| 1 | 0.3345 | 18.426 | 8.420  | 16.997 | 26.018 | 21.731 |
| 1 | 0.3355 | 18.137 | 11.357 | 18.625 | 25.699 | 22.214 |
| 1 | 0.3365 | 17.555 | 10.869 | 17.312 | 29.348 | 20.943 |
| 1 | 0.3375 | 31.102 | 21.206 | 25.636 | 14.456 | 15.954 |
| 1 | 0.3385 | 18.233 | 13.201 | 15.395 | 13.866 | 22.849 |
| 1 | 0.3395 | 21.457 | 9.518  | 20.994 | 19.176 | 16.992 |
| 1 | 0.3405 | 20.634 | 9.683  | 18.868 | 33.127 | 19.867 |
| 1 | 0.3415 | 5.463  | 1.657  | 3.243  | 15.724 | 7.454  |
| 1 | 0.3425 | 8.929  | 8.577  | 9.129  | 19.653 | 18.680 |
| 1 | 0.3435 | 17.467 | 12.901 | 13.737 | 36.187 | 25.308 |
| 1 | 0.3445 | 14.053 | 7.996  | 7.780  | 30.444 | 14.392 |
| 1 | 0.3455 | 14.187 | 9.843  | 14.192 | 26.783 | 13.357 |
| 1 | 0.3465 | 18.249 | 9.125  | 17.088 | 23.112 | 20.904 |

|   |        |        |        |        |        |        |
|---|--------|--------|--------|--------|--------|--------|
| 1 | 0.3475 | 28.542 | 24.402 | 21.929 | 16.953 | 15.310 |
| 1 | 0.3485 | 36.197 | 25.807 | 24.851 | 16.592 | 15.049 |
| 1 | 0.3495 | 19.828 | 14.512 | 21.822 | 14.567 | 6.613  |
| 1 | 0.3505 | 24.140 | 14.868 | 21.047 | 29.985 | 10.900 |
| 1 | 0.3515 | 17.931 | 17.602 | 20.297 | 11.609 | 9.377  |
| 1 | 0.3525 | 19.627 | 21.916 | 22.903 | 23.570 | 16.828 |
| 1 | 0.3535 | 23.192 | 12.697 | 17.682 | 26.874 | 16.978 |
| 1 | 0.3545 | 21.145 | 14.522 | 18.026 | 19.446 | 7.639  |
| 1 | 0.3555 | 33.519 | 17.363 | 26.031 | 19.284 | 11.834 |
| 1 | 0.3565 | 23.696 | 19.560 | 22.203 | 16.603 | 6.162  |
| 1 | 0.3575 | 11.171 | 14.990 | 16.444 | 19.144 | 8.589  |
| 1 | 0.3585 | 14.782 | 12.144 | 13.053 | 17.355 | 16.086 |
| 1 | 0.3595 | 14.317 | 7.814  | 11.638 | 12.387 | 12.509 |
| 1 | 0.3605 | 12.471 | 9.454  | 18.302 | 10.646 | 11.152 |
| 1 | 0.3615 | 19.810 | 13.577 | 18.935 | 15.919 | 12.171 |
| 1 | 0.3625 | 30.172 | 18.630 | 23.936 | 22.990 | 20.177 |
| 1 | 0.3635 | 16.707 | 13.474 | 11.782 | 10.097 | 25.024 |
| 1 | 0.3645 | 13.125 | 10.606 | 12.396 | 13.622 | 25.780 |
| 1 | 0.3655 | 29.031 | 16.303 | 21.768 | 11.331 | 15.021 |
| 1 | 0.3665 | 12.726 | 7.529  | 12.579 | 11.696 | 13.733 |
| 1 | 0.3675 | 12.028 | 11.634 | 13.684 | 5.212  | 10.330 |
| 1 | 0.3685 | 9.578  | 8.434  | 9.235  | 1.822  | 4.498  |
| 1 | 0.3695 | 23.942 | 6.851  | 14.079 | 23.240 | 13.876 |
| 1 | 0.3705 | 10.180 | 5.313  | 8.778  | 19.819 | 18.146 |
| 1 | 0.3715 | 16.736 | 4.578  | 6.016  | 15.792 | 21.509 |
| 1 | 0.3725 | 31.604 | 9.771  | 18.335 | 19.453 | 14.560 |
| 1 | 0.3735 | 24.523 | 8.894  | 18.265 | 20.336 | 13.666 |
| 1 | 0.3745 | 13.726 | 8.636  | 9.007  | 24.294 | 7.835  |
| 1 | 0.3755 | 19.627 | 10.125 | 11.993 | 23.199 | 25.123 |
| 1 | 0.3765 | 17.934 | 15.417 | 15.876 | 21.309 | 27.452 |
| 1 | 0.3775 | 16.866 | 9.008  | 11.267 | 17.993 | 14.193 |
| 1 | 0.3785 | 7.429  | 9.310  | 2.896  | 12.430 | 8.517  |
| 1 | 0.3795 | 11.862 | 17.942 | 9.584  | 17.860 | 8.736  |
| 1 | 0.3805 | 8.272  | 7.828  | 5.544  | 22.653 | 21.275 |
| 1 | 0.3815 | 15.405 | 13.710 | 18.662 | 26.377 | 26.814 |
| 1 | 0.3825 | 11.294 | 20.781 | 11.998 | 23.022 | 19.655 |
| 1 | 0.3835 | 8.913  | 8.795  | 6.145  | 19.636 | 15.383 |
| 1 | 0.3845 | 8.066  | 8.487  | 10.779 | 25.405 | 7.359  |
| 1 | 0.3855 | 7.026  | 8.226  | 9.147  | 22.143 | 16.143 |
| 1 | 0.3865 | 4.285  | 3.878  | 2.828  | 22.540 | 16.243 |
| 1 | 0.3875 | 9.507  | 8.706  | 9.587  | 16.055 | 23.306 |
| 1 | 0.3885 | 18.265 | 10.018 | 13.560 | 29.707 | 25.830 |
| 1 | 0.3895 | 16.033 | 8.963  | 12.098 | 23.561 | 27.446 |
| 1 | 0.3905 | 13.576 | 6.412  | 8.054  | 20.462 | 13.935 |
| 1 | 0.3915 | 12.213 | 6.032  | 6.562  | 17.325 | 15.906 |
| 1 | 0.3925 | 11.978 | 13.236 | 8.346  | 19.971 | 12.564 |
| 1 | 0.3935 | 10.542 | 7.377  | 9.878  | 10.336 | 13.002 |
| 1 | 0.3945 | 13.042 | 9.847  | 10.345 | 11.390 | 18.514 |
| 1 | 0.3955 | 21.735 | 16.330 | 20.737 | 23.265 | 18.296 |
| 1 | 0.3965 | 10.551 | 13.566 | 11.452 | 13.227 | 14.829 |

|   |        |        |        |        |        |        |
|---|--------|--------|--------|--------|--------|--------|
| 1 | 0.3975 | 6.771  | 7.301  | 9.132  | 11.878 | 10.544 |
| 1 | 0.3985 | 3.871  | 2.918  | 3.238  | 12.424 | 5.813  |
| 1 | 0.3995 | 13.461 | 18.941 | 13.351 | 29.594 | 13.520 |
| 1 | 0.4005 | 9.700  | 14.560 | 11.014 | 26.892 | 8.659  |
| 1 | 0.4015 | 12.580 | 10.387 | 12.798 | 31.144 | 14.925 |
| 1 | 0.4025 | 22.689 | 15.557 | 15.377 | 14.571 | 27.659 |
| 1 | 0.4035 | 16.566 | 13.702 | 15.313 | 12.897 | 14.326 |
| 1 | 0.4045 | 9.680  | 7.467  | 8.558  | 12.910 | 16.137 |
| 1 | 0.4055 | 18.550 | 12.043 | 8.953  | 16.939 | 19.850 |
| 1 | 0.4065 | 15.298 | 18.790 | 18.220 | 18.474 | 14.375 |
| 1 | 0.4075 | 17.269 | 9.227  | 13.766 | 15.161 | 21.088 |
| 1 | 0.4085 | 16.865 | 10.030 | 9.648  | 17.386 | 12.833 |
| 1 | 0.4095 | 5.762  | 15.349 | 8.752  | 20.112 | 6.922  |
| 1 | 0.4105 | 17.276 | 15.133 | 17.120 | 14.653 | 6.365  |
| 1 | 0.4115 | 8.047  | 5.505  | 6.048  | 18.603 | 5.757  |
| 1 | 0.4125 | 6.687  | 2.310  | 6.316  | 21.886 | 16.487 |
| 1 | 0.4135 | 15.082 | 10.231 | 12.938 | 19.771 | 9.311  |
| 1 | 0.4145 | 5.195  | 13.124 | 8.150  | 10.064 | 7.765  |
| 1 | 0.4155 | 19.622 | 22.832 | 27.173 | 7.999  | 8.042  |
| 1 | 0.4165 | 23.534 | 16.791 | 23.937 | 18.371 | 18.985 |
| 1 | 0.4175 | 15.248 | 9.516  | 16.922 | 15.939 | 15.823 |
| 1 | 0.4185 | 18.684 | 6.657  | 13.079 | 25.413 | 11.223 |
| 1 | 0.4195 | 14.275 | 8.357  | 10.861 | 18.943 | 17.030 |
| 1 | 0.4205 | 12.774 | 12.367 | 10.225 | 7.160  | 13.940 |
| 1 | 0.4215 | 12.016 | 7.444  | 9.971  | 11.691 | 18.051 |
| 1 | 0.4225 | 14.013 | 8.598  | 12.431 | 6.650  | 10.041 |
| 1 | 0.4235 | 17.457 | 9.916  | 14.685 | 21.604 | 11.725 |
| 1 | 0.4245 | 17.461 | 9.931  | 14.691 | 21.625 | 11.727 |
| 1 | 0.4255 | 17.494 | 7.035  | 13.043 | 20.892 | 11.333 |
| 1 | 0.4265 | 17.474 | 7.048  | 13.023 | 20.906 | 11.338 |
| 1 | 0.4275 | 14.805 | 7.257  | 8.878  | 26.818 | 16.615 |
| 1 | 0.4285 | 14.976 | 11.271 | 12.139 | 22.139 | 13.262 |
| 1 | 0.4295 | 11.663 | 8.238  | 12.138 | 10.155 | 17.887 |
| 1 | 0.4305 | 9.028  | 13.991 | 11.217 | 14.880 | 10.099 |
| 1 | 0.4315 | 10.639 | 12.937 | 11.937 | 18.223 | 11.113 |
| 1 | 0.4325 | 7.649  | 10.842 | 10.940 | 19.747 | 11.074 |
| 1 | 0.4335 | 7.694  | 14.705 | 9.621  | 20.334 | 11.188 |
| 1 | 0.4345 | 10.387 | 15.575 | 15.649 | 21.849 | 25.599 |
| 1 | 0.4355 | 13.006 | 10.922 | 20.614 | 20.610 | 21.601 |
| 1 | 0.4365 | 19.584 | 10.261 | 18.806 | 13.571 | 13.730 |
| 1 | 0.4375 | 14.789 | 14.327 | 14.943 | 17.980 | 4.735  |
| 1 | 0.4385 | 17.543 | 12.330 | 13.697 | 17.991 | 16.001 |
| 1 | 0.4395 | 13.774 | 13.864 | 12.239 | 9.330  | 9.294  |
| 1 | 0.4405 | 16.186 | 13.110 | 14.689 | 20.683 | 6.695  |
| 1 | 0.4415 | 24.530 | 18.482 | 21.894 | 8.563  | 16.178 |
| 1 | 0.4425 | 25.336 | 19.965 | 27.844 | 13.074 | 9.572  |
| 1 | 0.4435 | 7.801  | 12.625 | 11.097 | 23.292 | 13.925 |
| 1 | 0.4445 | 8.247  | 14.845 | 14.375 | 18.858 | 21.500 |
| 1 | 0.4455 | 25.409 | 19.089 | 19.303 | 25.720 | 15.241 |
| 1 | 0.4465 | 14.030 | 14.439 | 6.671  | 10.358 | 10.471 |

|   |        |        |        |        |        |        |
|---|--------|--------|--------|--------|--------|--------|
| 1 | 0.4475 | 11.228 | 7.998  | 7.167  | 7.125  | 12.665 |
| 1 | 0.4485 | 18.025 | 11.578 | 9.286  | 19.691 | 18.176 |
| 1 | 0.4495 | 18.056 | 11.388 | 9.271  | 19.626 | 18.135 |
| 1 | 0.4505 | 10.377 | 13.195 | 9.148  | 18.704 | 8.163  |
| 1 | 0.4515 | 11.960 | 9.569  | 10.550 | 19.642 | 13.898 |
| 1 | 0.4525 | 9.169  | 5.733  | 5.118  | 16.765 | 6.322  |
| 1 | 0.4535 | 10.818 | 7.298  | 8.715  | 14.292 | 5.619  |
| 1 | 0.4545 | 13.935 | 22.832 | 13.990 | 16.627 | 20.308 |
| 1 | 0.4555 | 8.798  | 8.873  | 6.044  | 22.889 | 13.238 |
| 1 | 0.4565 | 11.945 | 8.456  | 8.246  | 16.204 | 19.244 |
| 1 | 0.4575 | 5.990  | 11.509 | 8.036  | 13.120 | 18.541 |
| 1 | 0.4585 | 13.058 | 6.157  | 9.279  | 8.480  | 8.188  |
| 1 | 0.4595 | 12.792 | 4.203  | 6.921  | 10.792 | 13.645 |
| 1 | 0.4605 | 15.150 | 11.591 | 19.056 | 19.065 | 8.269  |
| 1 | 0.4615 | 8.566  | 18.755 | 14.420 | 25.370 | 17.594 |
| 1 | 0.4625 | 19.351 | 8.198  | 13.138 | 23.506 | 20.077 |
| 1 | 0.4635 | 17.281 | 12.449 | 13.230 | 22.816 | 19.960 |
| 1 | 0.4645 | 18.709 | 12.698 | 9.591  | 25.849 | 13.928 |
| 1 | 0.4655 | 7.443  | 8.978  | 7.397  | 18.512 | 7.003  |
| 1 | 0.4665 | 13.210 | 8.686  | 9.554  | 18.693 | 13.254 |
| 1 | 0.4675 | 19.812 | 9.241  | 15.340 | 17.163 | 18.517 |
| 1 | 0.4685 | 15.803 | 20.749 | 17.510 | 21.185 | 20.802 |
| 1 | 0.4695 | 19.807 | 16.966 | 18.316 | 14.766 | 22.344 |
| 1 | 0.4705 | 10.574 | 8.368  | 7.202  | 15.185 | 19.011 |
| 1 | 0.4715 | 10.196 | 12.671 | 13.150 | 29.143 | 12.392 |
| 1 | 0.4725 | 8.544  | 8.634  | 9.494  | 28.342 | 15.739 |
| 1 | 0.4735 | 8.890  | 14.646 | 7.430  | 28.255 | 24.782 |
| 1 | 0.4745 | 12.577 | 9.025  | 13.209 | 18.257 | 19.708 |
| 1 | 0.4755 | 9.140  | 9.199  | 9.861  | 15.492 | 21.113 |
| 1 | 0.4765 | 7.129  | 3.002  | 7.335  | 5.971  | 6.819  |
| 1 | 0.4775 | 7.428  | 8.144  | 6.466  | 8.864  | 5.341  |
| 1 | 0.4785 | 7.663  | 9.774  | 9.560  | 12.794 | 20.824 |
| 1 | 0.4795 | 16.778 | 15.486 | 15.498 | 25.150 | 26.882 |
| 1 | 0.4805 | 11.969 | 12.919 | 16.835 | 20.615 | 14.387 |
| 1 | 0.4815 | 13.412 | 7.116  | 13.275 | 14.042 | 16.546 |
| 1 | 0.4825 | 9.016  | 10.239 | 11.650 | 15.929 | 3.658  |
| 1 | 0.4835 | 13.522 | 15.962 | 21.322 | 18.848 | 10.062 |
| 1 | 0.4845 | 13.153 | 11.627 | 17.580 | 10.650 | 5.343  |
| 1 | 0.4855 | 11.603 | 14.828 | 12.302 | 23.538 | 9.862  |
| 1 | 0.4865 | 12.211 | 13.333 | 15.883 | 21.247 | 9.186  |
| 1 | 0.4875 | 20.329 | 17.750 | 21.325 | 19.016 | 7.040  |
| 1 | 0.4885 | 6.790  | 7.819  | 5.136  | 13.325 | 5.766  |
| 1 | 0.4895 | 9.537  | 10.714 | 16.577 | 9.577  | 11.569 |
| 1 | 0.4905 | 18.225 | 17.574 | 32.008 | 9.476  | 9.816  |
| 1 | 0.4915 | 18.192 | 17.572 | 31.969 | 9.423  | 9.796  |
| 1 | 0.4925 | 3.437  | 11.466 | 9.743  | 8.080  | 13.087 |
| 1 | 0.4935 | 9.731  | 12.791 | 12.276 | 8.118  | 9.445  |
| 1 | 0.4945 | 13.851 | 10.249 | 9.163  | 14.631 | 9.264  |
| 1 | 0.4955 | 9.622  | 11.644 | 10.474 | 10.620 | 10.004 |
| 1 | 0.4965 | 10.333 | 6.014  | 8.989  | 7.350  | 12.727 |



|   |        |        |        |        |        |        |
|---|--------|--------|--------|--------|--------|--------|
| 1 | 0.4975 | 17.209 | 20.542 | 22.897 | 15.548 | 17.333 |
| 1 | 0.4985 | 9.599  | 13.132 | 16.061 | 15.518 | 24.654 |
| 1 | 0.4995 | 9.180  | 17.458 | 9.790  | 13.569 | 11.064 |
| 1 | 0.5005 | 7.770  | 11.923 | 8.607  | 18.263 | 18.366 |
| 1 | 0.5015 | 4.844  | 12.431 | 8.325  | 22.892 | 17.393 |
| 1 | 0.5025 | 7.177  | 11.580 | 10.536 | 20.393 | 21.524 |
| 1 | 0.5035 | 13.209 | 20.337 | 16.414 | 20.137 | 26.891 |
| 1 | 0.5045 | 14.376 | 13.534 | 11.781 | 21.241 | 20.804 |
| 1 | 0.5055 | 15.909 | 18.205 | 13.522 | 29.570 | 19.601 |
| 1 | 0.5065 | 12.727 | 10.863 | 12.896 | 28.151 | 16.314 |
| 1 | 0.5075 | 15.731 | 7.949  | 14.231 | 11.032 | 10.716 |
| 1 | 0.5085 | 13.202 | 9.464  | 14.584 | 14.601 | 15.490 |
| 1 | 0.5095 | 7.954  | 9.511  | 11.575 | 20.391 | 15.273 |
| 1 | 0.5105 | 15.272 | 14.804 | 18.108 | 26.730 | 21.918 |
| 1 | 0.5115 | 20.329 | 15.099 | 18.657 | 28.785 | 17.270 |
| 1 | 0.5125 | 23.627 | 15.893 | 20.269 | 22.181 | 7.860  |
| 1 | 0.5135 | 24.467 | 8.585  | 24.415 | 20.115 | 6.529  |
| 1 | 0.5145 | 17.454 | 16.319 | 15.139 | 25.543 | 15.805 |
| 1 | 0.5155 | 9.388  | 11.725 | 10.616 | 17.827 | 19.131 |
| 1 | 0.5165 | 10.914 | 17.679 | 11.973 | 28.944 | 20.690 |
| 1 | 0.5175 | 14.041 | 10.812 | 9.502  | 15.952 | 9.324  |
| 1 | 0.5185 | 13.692 | 11.452 | 13.599 | 8.454  | 33.211 |
| 1 | 0.5195 | 32.219 | 20.231 | 30.146 | 11.536 | 22.498 |
| 1 | 0.5205 | 23.767 | 18.691 | 23.913 | 10.729 | 14.845 |
| 1 | 0.5215 | 14.681 | 8.018  | 15.366 | 15.370 | 13.795 |
| 1 | 0.5225 | 5.540  | 3.998  | 7.258  | 12.838 | 24.619 |
| 1 | 0.5235 | 14.431 | 15.483 | 24.770 | 28.027 | 25.773 |
| 1 | 0.5245 | 11.826 | 15.291 | 11.742 | 28.386 | 18.952 |
| 1 | 0.5255 | 15.151 | 13.642 | 16.358 | 27.282 | 14.476 |
| 1 | 0.5265 | 12.275 | 15.824 | 12.014 | 23.105 | 13.745 |
| 1 | 0.5275 | 14.152 | 8.986  | 9.901  | 20.403 | 13.399 |
| 1 | 0.5285 | 3.840  | 10.664 | 6.772  | 15.248 | 12.436 |
| 1 | 0.5295 | 5.907  | 7.705  | 7.158  | 16.595 | 15.283 |
| 1 | 0.5305 | 5.327  | 6.014  | 4.392  | 20.822 | 9.253  |
| 1 | 0.5315 | 20.010 | 16.420 | 24.133 | 15.777 | 9.561  |
| 1 | 0.5325 | 21.495 | 19.648 | 20.675 | 19.577 | 9.063  |
| 1 | 0.5335 | 18.119 | 17.661 | 20.667 | 14.123 | 21.576 |
| 1 | 0.5345 | 21.041 | 16.165 | 17.157 | 17.073 | 22.239 |
| 1 | 0.5355 | 22.500 | 10.272 | 20.286 | 25.687 | 20.332 |
| 1 | 0.5365 | 14.258 | 15.170 | 17.957 | 30.827 | 12.735 |
| 1 | 0.5375 | 12.877 | 6.907  | 11.535 | 26.842 | 20.015 |
| 1 | 0.5385 | 12.471 | 9.285  | 15.938 | 19.109 | 13.207 |
| 1 | 0.5395 | 8.479  | 6.012  | 9.945  | 14.108 | 18.244 |
| 1 | 0.5405 | 8.575  | 7.654  | 5.100  | 12.328 | 8.753  |
| 1 | 0.5415 | 23.145 | 9.802  | 15.864 | 16.112 | 18.280 |
| 1 | 0.5425 | 15.355 | 10.787 | 12.653 | 15.287 | 32.970 |
| 1 | 0.5435 | 19.348 | 13.862 | 18.217 | 11.704 | 18.595 |
| 1 | 0.5445 | 13.098 | 9.055  | 12.939 | 12.717 | 11.489 |
| 1 | 0.5455 | 6.900  | 4.055  | 4.113  | 11.624 | 10.926 |
| 1 | 0.5465 | 11.306 | 5.627  | 10.227 | 13.368 | 17.000 |

|   |        |        |        |        |        |        |
|---|--------|--------|--------|--------|--------|--------|
| 1 | 0.5475 | 5.383  | 5.483  | 1.478  | 17.791 | 18.120 |
| 1 | 0.5485 | 7.944  | 13.486 | 8.596  | 15.976 | 15.469 |
| 1 | 0.5495 | 8.146  | 8.873  | 4.249  | 14.558 | 14.422 |
| 1 | 0.5505 | 9.813  | 8.113  | 7.027  | 15.367 | 24.575 |
| 1 | 0.5515 | 14.555 | 8.939  | 11.538 | 12.033 | 22.534 |
| 1 | 0.5525 | 16.092 | 9.762  | 10.723 | 13.383 | 28.496 |
| 1 | 0.5535 | 7.907  | 7.449  | 9.856  | 20.047 | 21.754 |
| 1 | 0.5545 | 28.040 | 17.828 | 29.871 | 20.378 | 11.883 |
| 1 | 0.5555 | 12.455 | 5.523  | 11.947 | 15.370 | 24.957 |
| 1 | 0.5565 | 14.994 | 7.064  | 12.521 | 19.444 | 27.827 |
| 1 | 0.5575 | 20.705 | 7.653  | 11.617 | 19.313 | 36.384 |
| 1 | 0.5585 | 23.668 | 12.317 | 21.146 | 15.895 | 15.058 |
| 1 | 0.5595 | 21.964 | 15.548 | 18.027 | 12.434 | 13.833 |
| 1 | 0.5605 | 20.946 | 19.013 | 15.898 | 11.914 | 31.060 |
| 1 | 0.5615 | 15.734 | 7.950  | 7.378  | 16.000 | 30.733 |
| 1 | 0.5625 | 14.938 | 9.766  | 11.240 | 10.260 | 18.825 |
| 1 | 0.5635 | 29.048 | 14.408 | 21.022 | 23.837 | 15.070 |
| 1 | 0.5645 | 23.191 | 15.642 | 21.176 | 15.013 | 30.056 |
| 1 | 0.5655 | 27.938 | 19.164 | 23.521 | 9.733  | 30.738 |
| 1 | 0.5665 | 11.654 | 6.673  | 6.916  | 17.128 | 15.245 |
| 1 | 0.5675 | 12.980 | 8.564  | 11.790 | 19.455 | 15.674 |
| 1 | 0.5685 | 17.828 | 10.743 | 13.439 | 18.971 | 31.133 |
| 1 | 0.5695 | 24.199 | 14.524 | 15.367 | 20.156 | 17.347 |
| 1 | 0.5705 | 20.926 | 9.535  | 13.537 | 22.648 | 16.038 |
| 1 | 0.5715 | 20.932 | 9.565  | 13.575 | 22.651 | 16.047 |
| 1 | 0.5725 | 22.497 | 15.960 | 17.079 | 35.319 | 32.205 |
| 1 | 0.5735 | 10.686 | 8.342  | 7.080  | 11.885 | 28.966 |
| 1 | 0.5745 | 10.071 | 7.089  | 5.248  | 14.617 | 31.556 |
| 1 | 0.5755 | 11.830 | 13.476 | 12.492 | 20.551 | 17.522 |
| 1 | 0.5765 | 8.644  | 12.389 | 7.752  | 14.614 | 26.675 |
| 1 | 0.5775 | 14.633 | 17.610 | 14.328 | 15.669 | 26.511 |
| 1 | 0.5785 | 14.926 | 11.757 | 10.572 | 8.371  | 27.142 |
| 1 | 0.5795 | 23.059 | 19.569 | 20.861 | 17.556 | 22.278 |
| 1 | 0.5805 | 15.050 | 10.017 | 15.864 | 20.427 | 21.566 |
| 1 | 0.5815 | 14.937 | 6.808  | 12.618 | 21.696 | 21.486 |
| 1 | 0.5825 | 6.758  | 4.547  | 6.994  | 8.497  | 4.325  |
| 1 | 0.5835 | 6.656  | 2.970  | 6.075  | 14.941 | 16.299 |
| 1 | 0.5845 | 4.914  | 10.251 | 6.487  | 27.746 | 24.555 |
| 1 | 0.5855 | 15.488 | 11.947 | 12.516 | 19.604 | 27.732 |
| 1 | 0.5865 | 11.383 | 3.325  | 6.399  | 16.818 | 10.585 |
| 1 | 0.5875 | 15.969 | 9.030  | 11.471 | 14.793 | 15.325 |
| 1 | 0.5885 | 6.931  | 7.123  | 7.804  | 14.347 | 14.860 |
| 1 | 0.5895 | 11.718 | 10.181 | 11.159 | 11.645 | 23.258 |
| 1 | 0.5905 | 18.561 | 13.781 | 16.019 | 14.271 | 27.224 |
| 1 | 0.5915 | 12.344 | 10.120 | 12.896 | 10.132 | 16.352 |
| 1 | 0.5925 | 6.353  | 9.333  | 6.815  | 7.838  | 14.869 |
| 1 | 0.5935 | 8.868  | 8.933  | 7.165  | 10.619 | 21.532 |
| 1 | 0.5945 | 17.078 | 15.820 | 17.118 | 17.341 | 24.397 |
| 1 | 0.5955 | 11.703 | 7.001  | 6.369  | 14.396 | 15.061 |
| 1 | 0.5965 | 25.695 | 14.074 | 25.124 | 9.493  | 10.542 |

|   |        |        |        |        |        |        |
|---|--------|--------|--------|--------|--------|--------|
| 1 | 0.5975 | 19.535 | 12.479 | 12.789 | 9.354  | 18.752 |
| 1 | 0.5985 | 23.671 | 25.415 | 24.898 | 11.709 | 17.721 |
| 1 | 0.5995 | 16.891 | 19.460 | 19.656 | 11.305 | 17.952 |
| 1 | 0.6005 | 25.878 | 18.750 | 16.624 | 15.783 | 23.720 |
| 1 | 0.6015 | 9.452  | 8.198  | 7.299  | 12.877 | 16.660 |
| 1 | 0.6025 | 16.943 | 16.158 | 14.132 | 9.776  | 14.564 |
| 1 | 0.6035 | 19.977 | 19.082 | 20.231 | 14.820 | 17.722 |
| 1 | 0.6045 | 20.789 | 22.762 | 19.935 | 17.699 | 12.715 |
| 1 | 0.6055 | 19.112 | 22.491 | 21.492 | 14.638 | 14.116 |
| 1 | 0.6065 | 23.583 | 28.786 | 23.228 | 9.906  | 9.699  |
| 1 | 0.6075 | 14.936 | 19.278 | 16.998 | 8.764  | 10.545 |
| 1 | 0.6085 | 23.255 | 21.236 | 20.552 | 6.276  | 27.121 |
| 1 | 0.6095 | 14.725 | 16.363 | 14.585 | 5.944  | 21.585 |
| 1 | 0.6105 | 21.242 | 16.269 | 16.383 | 7.675  | 16.745 |
| 1 | 0.6115 | 20.176 | 14.850 | 18.978 | 6.664  | 13.675 |
| 1 | 0.6125 | 22.775 | 22.213 | 15.995 | 13.445 | 25.061 |
| 1 | 0.6135 | 19.306 | 22.206 | 19.220 | 15.496 | 29.400 |
| 1 | 0.6145 | 20.142 | 25.625 | 18.892 | 8.685  | 30.591 |
| 1 | 0.6155 | 23.398 | 27.195 | 21.009 | 7.596  | 29.675 |
| 1 | 0.6165 | 17.344 | 18.938 | 14.269 | 11.923 | 17.899 |
| 1 | 0.6175 | 12.662 | 14.677 | 13.012 | 13.953 | 20.908 |
| 1 | 0.6185 | 25.271 | 24.934 | 20.527 | 18.555 | 14.388 |
| 1 | 0.6195 | 26.122 | 17.257 | 19.679 | 11.663 | 19.765 |
| 1 | 0.6205 | 30.162 | 25.324 | 29.094 | 11.180 | 18.806 |
| 1 | 0.6215 | 29.522 | 17.144 | 23.233 | 9.573  | 20.436 |
| 1 | 0.6225 | 16.002 | 11.832 | 13.535 | 9.862  | 21.960 |
| 1 | 0.6235 | 26.645 | 16.401 | 23.747 | 17.951 | 22.191 |
| 1 | 0.6245 | 23.009 | 23.888 | 22.422 | 13.559 | 19.213 |
| 1 | 0.6255 | 23.133 | 18.613 | 17.493 | 14.250 | 18.552 |
| 1 | 0.6265 | 17.982 | 8.878  | 10.204 | 8.391  | 17.242 |
| 1 | 0.6275 | 21.286 | 13.939 | 17.530 | 11.301 | 16.237 |
| 1 | 0.6285 | 14.409 | 13.081 | 17.108 | 9.663  | 21.856 |
| 1 | 0.6295 | 20.727 | 17.565 | 21.122 | 11.541 | 18.528 |
| 1 | 0.6305 | 25.428 | 16.176 | 21.243 | 7.121  | 18.097 |
| 1 | 0.6315 | 25.445 | 16.168 | 21.235 | 7.119  | 18.091 |
| 1 | 0.6325 | 8.733  | 6.947  | 5.761  | 8.824  | 15.795 |
| 1 | 0.6335 | 9.484  | 5.195  | 4.220  | 4.158  | 13.330 |
| 1 | 0.6345 | 8.661  | 6.533  | 2.859  | 4.369  | 11.035 |
| 1 | 0.6355 | 3.070  | 3.726  | 1.371  | 4.996  | 6.693  |
| 1 | 0.6365 | 23.771 | 17.273 | 23.484 | 7.455  | 20.244 |
| 1 | 0.6375 | 18.827 | 20.420 | 20.079 | 12.740 | 22.763 |
| 1 | 0.6385 | 18.844 | 20.451 | 20.103 | 12.759 | 22.823 |
| 1 | 0.6395 | 24.594 | 18.278 | 17.191 | 13.267 | 20.334 |
| 1 | 0.6405 | 16.040 | 12.984 | 15.513 | 11.777 | 24.888 |
| 1 | 0.6415 | 23.220 | 13.814 | 21.384 | 14.337 | 21.306 |
| 1 | 0.6425 | 12.691 | 8.225  | 7.649  | 5.822  | 13.782 |
| 1 | 0.6435 | 15.156 | 17.214 | 13.358 | 16.297 | 15.243 |
| 1 | 0.6445 | 2.745  | 2.882  | 2.503  | 4.152  | 14.779 |
| 1 | 0.6455 | 15.011 | 8.911  | 13.001 | 16.319 | 14.511 |
| 1 | 0.6465 | 9.397  | 8.164  | 9.095  | 6.963  | 18.888 |

|   |        |        |        |        |        |        |
|---|--------|--------|--------|--------|--------|--------|
| 1 | 0.6475 | 10.278 | 7.626  | 9.386  | 7.471  | 17.801 |
| 1 | 0.6485 | 9.311  | 3.562  | 7.120  | 3.001  | 13.626 |
| 1 | 0.6495 | 6.512  | 4.835  | 8.434  | 3.727  | 20.022 |
| 1 | 0.6505 | 21.586 | 6.113  | 14.249 | 10.349 | 28.529 |
| 1 | 0.6515 | 16.488 | 8.593  | 10.562 | 7.134  | 20.130 |
| 1 | 0.6525 | 11.744 | 12.772 | 14.198 | 15.624 | 19.510 |
| 1 | 0.6535 | 16.100 | 6.751  | 17.427 | 6.046  | 18.166 |
| 1 | 0.6545 | 21.661 | 8.345  | 15.327 | 7.929  | 17.386 |
| 1 | 0.6555 | 20.339 | 17.710 | 23.475 | 19.648 | 31.239 |
| 1 | 0.6565 | 26.075 | 16.340 | 14.823 | 14.619 | 25.138 |
| 1 | 0.6575 | 25.995 | 16.454 | 14.576 | 14.606 | 25.237 |
| 1 | 0.6585 | 19.378 | 14.208 | 12.018 | 19.010 | 30.113 |
| 1 | 0.6595 | 18.980 | 8.814  | 15.881 | 13.683 | 29.409 |
| 1 | 0.6605 | 12.049 | 13.557 | 10.144 | 15.825 | 25.634 |
| 1 | 0.6615 | 20.136 | 11.214 | 16.123 | 14.266 | 22.668 |
| 1 | 0.6625 | 21.243 | 12.575 | 9.302  | 11.226 | 27.395 |
| 1 | 0.6635 | 15.142 | 10.324 | 7.380  | 16.412 | 22.311 |
| 1 | 0.6645 | 18.000 | 14.487 | 20.077 | 12.629 | 19.249 |
| 1 | 0.6655 | 11.074 | 12.441 | 9.650  | 9.344  | 19.922 |
| 1 | 0.6665 | 13.540 | 16.330 | 16.291 | 9.194  | 26.823 |
| 1 | 0.6675 | 20.652 | 8.887  | 22.681 | 14.179 | 16.668 |
| 1 | 0.6685 | 26.363 | 9.432  | 19.720 | 10.725 | 21.059 |
| 1 | 0.6695 | 25.262 | 14.847 | 24.967 | 7.203  | 11.721 |
| 1 | 0.6705 | 17.331 | 11.553 | 20.168 | 14.666 | 22.285 |
| 1 | 0.6715 | 13.780 | 10.536 | 10.126 | 18.320 | 29.611 |
| 1 | 0.6725 | 9.841  | 12.347 | 13.760 | 15.623 | 25.796 |
| 1 | 0.6735 | 16.992 | 13.051 | 17.693 | 9.809  | 31.045 |
| 1 | 0.6745 | 16.255 | 14.836 | 18.885 | 14.782 | 26.598 |
| 1 | 0.6755 | 22.229 | 14.026 | 19.994 | 10.712 | 22.594 |
| 1 | 0.6765 | 6.230  | 4.805  | 11.983 | 5.228  | 14.832 |
| 1 | 0.6775 | 14.906 | 17.982 | 22.433 | 21.190 | 18.453 |
| 1 | 0.6785 | 20.238 | 19.866 | 19.522 | 13.208 | 18.771 |
| 1 | 0.6795 | 25.449 | 13.736 | 22.232 | 12.865 | 21.053 |
| 1 | 0.6805 | 17.765 | 11.361 | 22.291 | 12.613 | 12.276 |
| 1 | 0.6815 | 13.238 | 13.244 | 14.013 | 11.415 | 17.433 |
| 1 | 0.6825 | 6.309  | 6.078  | 4.693  | 8.457  | 18.144 |
| 1 | 0.6835 | 16.644 | 9.593  | 12.656 | 13.089 | 18.018 |
| 1 | 0.6845 | 17.582 | 8.356  | 20.167 | 7.791  | 10.565 |
| 1 | 0.6855 | 11.430 | 10.693 | 13.830 | 7.908  | 15.486 |
| 1 | 0.6865 | 11.220 | 4.412  | 11.539 | 10.432 | 17.999 |
| 1 | 0.6875 | 9.805  | 6.641  | 11.333 | 12.493 | 6.809  |
| 1 | 0.6885 | 15.353 | 9.118  | 16.752 | 2.403  | 9.629  |
| 1 | 0.6895 | 12.027 | 7.941  | 12.523 | 10.310 | 10.788 |
| 1 | 0.6905 | 11.917 | 9.412  | 11.568 | 5.540  | 10.625 |
| 1 | 0.6915 | 20.809 | 8.896  | 20.928 | 10.036 | 17.127 |
| 1 | 0.6925 | 21.052 | 10.238 | 17.336 | 8.631  | 9.988  |
| 1 | 0.6935 | 7.037  | 0.470  | 2.514  | 3.248  | 1.009  |
| 1 | 0.6945 | 7.380  | 3.102  | 7.032  | 8.052  | 10.675 |
| 1 | 0.6955 | 16.373 | 6.341  | 16.721 | 18.083 | 15.081 |
| 1 | 0.6965 | 11.034 | 10.451 | 18.038 | 8.268  | 15.559 |

|   |        |        |        |        |        |        |
|---|--------|--------|--------|--------|--------|--------|
| 1 | 0.6975 | 7.903  | 8.211  | 11.296 | 7.030  | 3.024  |
| 1 | 0.6985 | 13.890 | 6.693  | 6.020  | 7.097  | 6.812  |
| 1 | 0.6995 | 19.206 | 13.790 | 17.650 | 5.876  | 11.308 |
| 1 | 0.7005 | 14.681 | 7.914  | 11.670 | 10.352 | 19.411 |
| 1 | 0.7015 | 13.651 | 5.975  | 10.488 | 9.001  | 10.258 |
| 1 | 0.7025 | 6.875  | 1.282  | 2.932  | 4.767  | 4.655  |
| 1 | 0.7035 | 14.831 | 6.679  | 11.942 | 9.549  | 16.992 |
| 1 | 0.7045 | 14.890 | 11.463 | 17.419 | 13.122 | 19.214 |
| 1 | 0.7055 | 23.971 | 18.819 | 28.777 | 10.377 | 24.601 |
| 1 | 0.7065 | 3.136  | 7.178  | 10.564 | 7.199  | 7.022  |
| 1 | 0.7075 | 7.877  | 5.453  | 13.169 | 12.947 | 8.149  |
| 1 | 0.7085 | 8.819  | 5.286  | 14.485 | 10.160 | 7.874  |
| 1 | 0.7095 | 21.264 | 20.740 | 22.759 | 23.319 | 16.900 |
| 1 | 0.7105 | 12.147 | 13.243 | 13.525 | 16.155 | 23.236 |
| 1 | 0.7115 | 14.181 | 9.437  | 14.200 | 11.261 | 14.907 |
| 1 | 0.7125 | 12.576 | 15.125 | 14.452 | 9.936  | 19.242 |
| 1 | 0.7135 | 26.572 | 25.132 | 26.777 | 22.615 | 24.292 |
| 1 | 0.7145 | 21.650 | 19.869 | 25.246 | 17.699 | 17.441 |
| 1 | 0.7155 | 17.269 | 14.690 | 19.694 | 14.269 | 14.804 |
| 1 | 0.7165 | 23.630 | 17.127 | 19.325 | 12.591 | 14.882 |
| 1 | 0.7175 | 13.178 | 8.706  | 15.389 | 15.390 | 13.292 |
| 1 | 0.7185 | 13.301 | 7.957  | 12.834 | 14.540 | 15.927 |
| 1 | 0.7195 | 9.114  | 11.730 | 9.660  | 14.134 | 13.634 |
| 1 | 0.7205 | 15.818 | 9.992  | 13.859 | 16.882 | 9.191  |
| 1 | 0.7215 | 12.483 | 7.921  | 10.312 | 16.336 | 13.622 |
| 1 | 0.7225 | 24.189 | 11.644 | 20.304 | 18.256 | 14.238 |
| 1 | 0.7235 | 16.251 | 11.484 | 17.317 | 18.296 | 8.083  |
| 1 | 0.7245 | 9.322  | 7.748  | 10.092 | 13.556 | 14.427 |
| 1 | 0.7255 | 12.955 | 10.886 | 18.968 | 11.648 | 11.872 |
| 1 | 0.7265 | 20.872 | 22.522 | 16.759 | 20.542 | 11.173 |
| 1 | 0.7275 | 17.541 | 15.285 | 14.909 | 22.793 | 10.940 |
| 1 | 0.7285 | 18.503 | 13.473 | 14.871 | 6.333  | 16.769 |
| 1 | 0.7295 | 18.551 | 13.461 | 14.907 | 6.287  | 16.702 |
| 1 | 0.7305 | 18.930 | 13.594 | 9.493  | 12.517 | 13.183 |
| 1 | 0.7315 | 16.341 | 12.296 | 12.612 | 9.546  | 12.694 |
| 1 | 0.7325 | 17.743 | 12.336 | 16.476 | 10.572 | 11.126 |
| 1 | 0.7335 | 17.499 | 19.645 | 23.904 | 17.952 | 10.889 |
| 1 | 0.7345 | 13.278 | 15.626 | 15.209 | 22.188 | 18.102 |
| 1 | 0.7355 | 18.912 | 14.606 | 18.691 | 10.053 | 14.341 |
| 1 | 0.7365 | 42.173 | 20.783 | 28.970 | 9.390  | 10.720 |
| 1 | 0.7375 | 17.278 | 14.421 | 18.214 | 13.339 | 5.913  |
| 1 | 0.7385 | 13.006 | 11.766 | 12.533 | 13.107 | 7.266  |
| 1 | 0.7395 | 12.414 | 10.240 | 10.066 | 13.477 | 3.725  |
| 1 | 0.7405 | 15.997 | 11.115 | 12.014 | 12.635 | 5.321  |
| 1 | 0.7415 | 21.814 | 16.757 | 20.824 | 25.480 | 18.644 |
| 1 | 0.7425 | 22.796 | 13.057 | 16.656 | 22.646 | 12.756 |
| 1 | 0.7435 | 16.494 | 12.672 | 14.004 | 21.492 | 6.389  |
| 1 | 0.7445 | 12.706 | 11.891 | 12.307 | 24.258 | 11.835 |
| 1 | 0.7455 | 12.263 | 12.349 | 9.040  | 15.325 | 5.180  |
| 1 | 0.7465 | 13.557 | 10.427 | 14.637 | 11.514 | 11.598 |

|   |        |        |        |        |        |        |
|---|--------|--------|--------|--------|--------|--------|
| 1 | 0.7475 | 18.225 | 16.538 | 14.869 | 26.121 | 23.240 |
| 1 | 0.7485 | 16.432 | 17.229 | 12.819 | 25.397 | 17.685 |
| 1 | 0.7495 | 10.135 | 7.582  | 7.907  | 18.672 | 8.494  |
| 1 | 0.7505 | 15.044 | 10.043 | 14.526 | 4.727  | 4.891  |
| 1 | 0.7515 | 15.460 | 7.785  | 9.714  | 10.278 | 12.169 |
| 1 | 0.7525 | 18.445 | 10.261 | 14.513 | 21.015 | 17.209 |
| 1 | 0.7535 | 12.732 | 5.455  | 5.985  | 18.272 | 20.067 |
| 1 | 0.7545 | 11.378 | 10.855 | 8.446  | 25.212 | 20.820 |
| 1 | 0.7555 | 11.368 | 10.271 | 9.942  | 17.858 | 18.660 |
| 1 | 0.7565 | 10.809 | 11.528 | 9.553  | 23.249 | 10.617 |
| 1 | 0.7575 | 13.807 | 7.477  | 8.608  | 21.980 | 16.254 |
| 1 | 0.7585 | 9.884  | 8.489  | 4.349  | 20.072 | 27.048 |
| 1 | 0.7595 | 7.748  | 9.186  | 9.363  | 20.165 | 9.407  |
| 1 | 0.7605 | 9.746  | 8.124  | 7.062  | 17.917 | 13.699 |
| 1 | 0.7615 | 6.296  | 7.927  | 7.084  | 16.609 | 16.005 |
| 1 | 0.7625 | 8.408  | 10.020 | 12.628 | 16.585 | 11.459 |
| 1 | 0.7635 | 5.245  | 8.468  | 6.107  | 26.081 | 12.862 |
| 1 | 0.7645 | 6.744  | 9.740  | 7.161  | 19.975 | 23.856 |
| 1 | 0.7655 | 10.347 | 5.059  | 6.867  | 17.239 | 13.175 |
| 1 | 0.7665 | 15.582 | 10.346 | 8.112  | 10.219 | 17.252 |
| 1 | 0.7675 | 9.805  | 12.382 | 14.267 | 13.718 | 21.882 |
| 1 | 0.7685 | 25.860 | 19.711 | 23.685 | 23.224 | 16.695 |
| 1 | 0.7695 | 17.270 | 12.575 | 18.512 | 23.778 | 16.555 |
| 1 | 0.7705 | 22.488 | 18.407 | 22.412 | 23.101 | 16.780 |
| 1 | 0.7715 | 11.266 | 12.488 | 10.114 | 12.861 | 13.521 |
| 1 | 0.7725 | 12.214 | 7.457  | 7.772  | 21.889 | 20.277 |
| 1 | 0.7735 | 9.598  | 5.358  | 8.513  | 12.706 | 14.621 |
| 1 | 0.7745 | 14.337 | 7.227  | 12.346 | 13.348 | 11.204 |
| 1 | 0.7755 | 20.372 | 15.292 | 13.070 | 18.797 | 15.162 |
| 1 | 0.7765 | 24.469 | 14.263 | 21.829 | 18.070 | 15.119 |
| 1 | 0.7775 | 12.813 | 6.862  | 7.809  | 12.777 | 16.611 |
| 1 | 0.7785 | 21.268 | 15.603 | 21.438 | 15.741 | 21.915 |
| 1 | 0.7795 | 27.970 | 15.128 | 18.243 | 18.808 | 18.576 |
| 1 | 0.7805 | 18.697 | 5.386  | 17.564 | 13.828 | 7.175  |
| 1 | 0.7815 | 16.992 | 5.936  | 13.372 | 14.189 | 13.199 |
| 1 | 0.7825 | 22.057 | 6.055  | 17.183 | 17.580 | 17.079 |
| 1 | 0.7835 | 11.933 | 7.011  | 11.401 | 5.896  | 14.061 |
| 1 | 0.7845 | 15.551 | 6.712  | 11.491 | 7.283  | 20.450 |
| 1 | 0.7855 | 11.056 | 7.831  | 7.306  | 10.374 | 25.654 |
| 1 | 0.7865 | 7.390  | 7.808  | 8.006  | 17.189 | 16.683 |
| 1 | 0.7875 | 12.908 | 9.029  | 10.268 | 10.850 | 20.943 |
| 1 | 0.7885 | 19.192 | 8.892  | 16.255 | 17.471 | 11.671 |
| 1 | 0.7895 | 10.642 | 9.822  | 13.862 | 16.031 | 11.210 |
| 1 | 0.7905 | 13.558 | 11.048 | 12.982 | 14.347 | 13.792 |
| 1 | 0.7915 | 28.577 | 10.891 | 17.103 | 17.241 | 15.815 |
| 1 | 0.7925 | 20.509 | 12.002 | 17.512 | 17.040 | 19.549 |
| 1 | 0.7935 | 13.557 | 8.885  | 9.486  | 15.042 | 25.376 |
| 1 | 0.7945 | 9.388  | 3.144  | 5.491  | 14.193 | 23.036 |
| 1 | 0.7955 | 12.998 | 14.326 | 14.216 | 16.478 | 14.199 |
| 1 | 0.7965 | 18.543 | 14.878 | 14.932 | 25.691 | 15.657 |

|   |        |        |        |        |        |        |
|---|--------|--------|--------|--------|--------|--------|
| 1 | 0.7975 | 20.937 | 14.442 | 10.056 | 24.811 | 14.617 |
| 1 | 0.7985 | 18.903 | 8.268  | 12.579 | 19.731 | 22.409 |
| 1 | 0.7995 | 21.477 | 7.790  | 9.883  | 7.257  | 12.336 |
| 1 | 0.8005 | 14.449 | 6.499  | 11.176 | 11.615 | 15.636 |
| 1 | 0.8015 | 18.213 | 12.220 | 13.258 | 12.848 | 12.480 |
| 1 | 0.8025 | 9.406  | 4.124  | 11.402 | 8.445  | 10.469 |
| 1 | 0.8035 | 2.093  | 3.169  | 4.253  | 5.413  | 5.493  |
| 1 | 0.8045 | 6.882  | 3.116  | 4.620  | 18.001 | 20.401 |
| 1 | 0.8055 | 11.599 | 8.205  | 7.249  | 13.730 | 8.594  |
| 1 | 0.8065 | 9.415  | 2.003  | 5.576  | 10.301 | 10.201 |
| 1 | 0.8075 | 13.033 | 6.305  | 6.502  | 7.529  | 8.920  |
| 1 | 0.8085 | 7.663  | 4.675  | 3.655  | 10.876 | 9.138  |
| 1 | 0.8095 | 13.760 | 9.055  | 10.023 | 14.743 | 10.783 |
| 1 | 0.8105 | 19.297 | 14.561 | 12.964 | 21.643 | 18.368 |
| 1 | 0.8115 | 14.414 | 7.619  | 7.715  | 14.577 | 19.381 |
| 1 | 0.8125 | 16.333 | 9.147  | 14.050 | 9.985  | 13.667 |
| 1 | 0.8135 | 15.638 | 10.520 | 15.078 | 9.336  | 10.223 |
| 1 | 0.8145 | 16.408 | 5.989  | 7.651  | 18.558 | 18.822 |
| 1 | 0.8155 | 12.193 | 10.824 | 10.786 | 15.400 | 11.648 |
| 1 | 0.8165 | 1.870  | 3.475  | 1.288  | 3.207  | 5.229  |
| 1 | 0.8175 | 13.703 | 9.191  | 10.892 | 6.645  | 6.039  |
| 1 | 0.8185 | 16.520 | 13.310 | 16.561 | 10.364 | 9.376  |
| 1 | 0.8195 | 18.927 | 18.090 | 20.361 | 14.253 | 5.899  |
| 1 | 0.8205 | 14.593 | 10.091 | 10.523 | 15.906 | 13.635 |
| 1 | 0.8215 | 13.294 | 8.676  | 8.069  | 18.192 | 12.314 |
| 1 | 0.8225 | 12.918 | 10.351 | 6.935  | 16.440 | 22.585 |
| 1 | 0.8235 | 15.989 | 8.763  | 9.023  | 16.408 | 21.592 |
| 1 | 0.8245 | 7.167  | 5.967  | 2.921  | 10.595 | 4.583  |
| 1 | 0.8255 | 15.552 | 6.149  | 9.623  | 12.639 | 7.739  |
| 1 | 0.8265 | 17.490 | 9.743  | 11.268 | 7.241  | 8.761  |
| 1 | 0.8275 | 11.285 | 9.659  | 8.424  | 13.618 | 12.089 |
| 1 | 0.8285 | 14.971 | 7.757  | 11.183 | 19.084 | 18.660 |
| 1 | 0.8295 | 21.404 | 10.241 | 18.448 | 15.955 | 11.195 |
| 1 | 0.8305 | 25.619 | 10.933 | 16.844 | 13.276 | 17.293 |
| 1 | 0.8315 | 13.984 | 6.193  | 9.272  | 13.203 | 17.603 |
| 1 | 0.8325 | 19.505 | 10.367 | 15.674 | 18.699 | 14.162 |
| 1 | 0.8335 | 16.634 | 6.840  | 12.797 | 8.032  | 3.560  |
| 1 | 0.8345 | 23.003 | 6.346  | 11.984 | 11.193 | 11.822 |
| 1 | 0.8355 | 10.457 | 8.345  | 9.945  | 9.083  | 10.545 |
| 1 | 0.8365 | 18.840 | 9.650  | 10.864 | 11.573 | 12.674 |
| 1 | 0.8375 | 13.371 | 7.168  | 8.432  | 6.634  | 11.017 |
| 1 | 0.8385 | 7.607  | 8.166  | 5.696  | 17.466 | 11.663 |
| 1 | 0.8395 | 12.746 | 12.340 | 9.813  | 19.496 | 12.970 |
| 1 | 0.8405 | 11.817 | 13.553 | 6.253  | 8.557  | 16.744 |
| 1 | 0.8415 | 24.544 | 17.887 | 13.319 | 18.233 | 22.002 |
| 1 | 0.8425 | 21.267 | 17.829 | 16.746 | 16.867 | 21.481 |
| 1 | 0.8435 | 21.139 | 15.624 | 13.629 | 15.528 | 23.590 |
| 1 | 0.8445 | 4.630  | 3.982  | 1.701  | 17.085 | 8.412  |
| 1 | 0.8455 | 11.059 | 4.792  | 4.810  | 17.844 | 19.014 |
| 1 | 0.8465 | 18.174 | 8.909  | 11.620 | 27.138 | 24.423 |

|   |        |        |        |        |        |        |
|---|--------|--------|--------|--------|--------|--------|
| 1 | 0.8475 | 12.916 | 6.022  | 10.042 | 1.444  | 12.679 |
| 1 | 0.8485 | 6.904  | 2.931  | 6.029  | 0.193  | 1.966  |
| 1 | 0.8495 | 9.796  | 4.779  | 6.370  | 7.502  | 6.742  |
| 1 | 0.8505 | 9.571  | 3.867  | 6.200  | 5.596  | 6.492  |
| 1 | 0.8515 | 10.352 | 4.464  | 6.286  | 10.465 | 11.671 |
| 1 | 0.8525 | 10.289 | 4.401  | 6.600  | 13.257 | 15.412 |
| 1 | 0.8535 | 17.228 | 5.257  | 14.728 | 19.242 | 15.717 |
| 1 | 0.8545 | 21.873 | 6.448  | 15.942 | 30.852 | 13.960 |
| 1 | 0.8555 | 8.716  | 6.510  | 4.368  | 23.313 | 14.265 |
| 1 | 0.8565 | 12.974 | 7.356  | 7.472  | 7.878  | 15.849 |
| 1 | 0.8575 | 13.880 | 9.329  | 8.660  | 9.838  | 7.661  |
| 1 | 0.8585 | 14.176 | 8.703  | 13.610 | 11.129 | 11.342 |
| 1 | 0.8595 | 13.012 | 8.983  | 11.337 | 15.270 | 27.433 |
| 1 | 0.8605 | 11.425 | 11.265 | 15.464 | 15.853 | 19.025 |
| 1 | 0.8615 | 16.433 | 10.141 | 10.528 | 12.157 | 14.754 |
| 1 | 0.8625 | 8.917  | 8.127  | 11.002 | 6.463  | 2.905  |
| 1 | 0.8635 | 22.657 | 11.925 | 16.809 | 22.278 | 25.041 |
| 1 | 0.8645 | 18.948 | 7.800  | 12.979 | 14.795 | 16.070 |
| 1 | 0.8655 | 23.658 | 7.484  | 12.411 | 12.112 | 13.196 |
| 1 | 0.8665 | 23.032 | 8.796  | 10.816 | 16.287 | 12.226 |
| 1 | 0.8675 | 25.955 | 10.250 | 15.629 | 13.329 | 17.965 |
| 1 | 0.8685 | 21.530 | 10.729 | 12.840 | 17.487 | 13.516 |
| 1 | 0.8695 | 22.468 | 13.961 | 12.436 | 20.038 | 14.585 |
| 1 | 0.8705 | 30.099 | 7.774  | 19.775 | 17.778 | 20.135 |
| 1 | 0.8715 | 21.497 | 13.175 | 17.333 | 10.804 | 16.127 |
| 1 | 0.8725 | 11.875 | 6.048  | 10.199 | 9.514  | 8.418  |
| 1 | 0.8735 | 13.445 | 7.073  | 11.284 | 15.896 | 18.646 |
| 1 | 0.8745 | 23.441 | 13.029 | 15.078 | 10.889 | 14.989 |
| 1 | 0.8755 | 11.447 | 3.434  | 6.678  | 17.871 | 13.165 |
| 1 | 0.8765 | 10.957 | 10.590 | 10.368 | 19.718 | 9.369  |
| 1 | 0.8775 | 27.539 | 15.100 | 18.211 | 12.582 | 9.514  |
| 1 | 0.8785 | 18.898 | 8.484  | 12.571 | 20.387 | 11.044 |
| 1 | 0.8795 | 11.402 | 7.321  | 11.905 | 21.184 | 14.306 |
| 1 | 0.8805 | 11.268 | 6.408  | 11.505 | 17.539 | 14.673 |
| 1 | 0.8815 | 12.419 | 6.246  | 9.145  | 22.492 | 29.368 |
| 1 | 0.8825 | 12.135 | 5.352  | 11.845 | 19.971 | 23.820 |
| 1 | 0.8835 | 12.802 | 8.481  | 12.950 | 16.845 | 12.666 |
| 1 | 0.8845 | 12.828 | 15.557 | 9.691  | 23.797 | 19.506 |
| 1 | 0.8855 | 8.643  | 9.879  | 6.076  | 23.973 | 15.197 |
| 1 | 0.8865 | 14.309 | 14.559 | 8.228  | 20.536 | 12.824 |
| 1 | 0.8875 | 18.259 | 16.337 | 14.233 | 31.990 | 16.580 |
| 1 | 0.8885 | 10.404 | 10.399 | 6.834  | 26.060 | 23.121 |
| 1 | 0.8895 | 15.983 | 8.073  | 7.968  | 10.693 | 4.614  |
| 1 | 0.8905 | 7.743  | 7.147  | 6.636  | 15.913 | 8.446  |
| 1 | 0.8915 | 8.360  | 5.352  | 6.659  | 13.712 | 11.391 |
| 1 | 0.8925 | 14.062 | 3.613  | 9.048  | 22.210 | 24.659 |
| 1 | 0.8935 | 16.627 | 7.570  | 6.815  | 16.662 | 25.007 |
| 1 | 0.8945 | 22.294 | 13.057 | 16.073 | 27.917 | 13.411 |
| 1 | 0.8955 | 12.482 | 8.694  | 10.428 | 16.599 | 15.254 |
| 1 | 0.8965 | 17.440 | 9.088  | 12.660 | 24.257 | 19.896 |



|   |        |        |        |        |        |        |
|---|--------|--------|--------|--------|--------|--------|
| 1 | 0.8975 | 5.814  | 9.151  | 5.122  | 20.334 | 18.175 |
| 1 | 0.8985 | 16.049 | 10.777 | 9.628  | 11.638 | 23.129 |
| 1 | 0.8995 | 22.881 | 18.928 | 21.439 | 23.483 | 16.634 |
| 1 | 0.9005 | 15.284 | 18.820 | 11.578 | 28.375 | 13.700 |
| 1 | 0.9015 | 28.813 | 28.100 | 28.326 | 21.239 | 11.085 |
| 1 | 0.9025 | 16.850 | 8.056  | 12.332 | 17.557 | 19.639 |
| 1 | 0.9035 | 18.375 | 17.827 | 16.213 | 25.438 | 15.838 |
| 1 | 0.9045 | 15.303 | 11.988 | 14.271 | 14.137 | 16.312 |
| 1 | 0.9055 | 20.005 | 11.903 | 12.113 | 15.113 | 15.016 |
| 1 | 0.9065 | 26.482 | 13.805 | 23.458 | 14.794 | 14.996 |
| 1 | 0.9075 | 21.139 | 5.591  | 20.492 | 15.812 | 8.416  |
| 1 | 0.9085 | 17.123 | 5.660  | 20.816 | 10.625 | 11.571 |
| 1 | 0.9095 | 13.709 | 6.208  | 10.890 | 18.070 | 16.524 |
| 1 | 0.9105 | 24.383 | 10.281 | 15.831 | 23.919 | 15.334 |
| 1 | 0.9115 | 12.908 | 7.364  | 10.089 | 11.936 | 19.996 |
| 1 | 0.9125 | 30.724 | 18.184 | 25.533 | 19.113 | 13.468 |
| 1 | 0.9135 | 15.292 | 13.296 | 17.078 | 15.795 | 19.860 |
| 1 | 0.9145 | 18.630 | 11.409 | 20.291 | 9.911  | 12.307 |
| 1 | 0.9155 | 15.908 | 9.954  | 10.502 | 14.340 | 19.527 |
| 1 | 0.9165 | 23.624 | 14.627 | 19.510 | 25.286 | 20.219 |
| 1 | 0.9175 | 22.369 | 8.506  | 13.735 | 12.434 | 17.428 |
| 1 | 0.9185 | 10.457 | 4.896  | 6.330  | 16.193 | 19.960 |
| 1 | 0.9195 | 13.059 | 5.804  | 9.616  | 15.662 | 20.625 |
| 1 | 0.9205 | 13.476 | 9.712  | 10.222 | 10.903 | 14.458 |
| 1 | 0.9215 | 13.111 | 7.570  | 11.518 | 13.556 | 18.206 |
| 1 | 0.9225 | 22.194 | 18.490 | 17.627 | 13.024 | 17.297 |
| 1 | 0.9235 | 15.697 | 7.451  | 13.003 | 13.642 | 12.813 |
| 1 | 0.9245 | 16.744 | 11.104 | 14.386 | 14.994 | 16.425 |
| 1 | 0.9255 | 31.397 | 25.233 | 25.717 | 15.877 | 17.642 |
| 1 | 0.9265 | 13.853 | 10.154 | 7.837  | 13.642 | 21.364 |
| 1 | 0.9275 | 16.184 | 10.942 | 11.326 | 12.448 | 16.311 |
| 1 | 0.9285 | 14.607 | 9.633  | 9.499  | 11.963 | 17.576 |
| 1 | 0.9295 | 20.027 | 7.873  | 15.654 | 13.385 | 15.643 |
| 1 | 0.9305 | 22.907 | 9.137  | 21.746 | 15.348 | 23.535 |
| 1 | 0.9315 | 22.069 | 8.070  | 25.322 | 12.987 | 13.054 |
| 1 | 0.9325 | 12.078 | 11.083 | 10.806 | 15.912 | 7.044  |
| 1 | 0.9335 | 19.795 | 17.178 | 12.545 | 15.848 | 16.714 |
| 1 | 0.9345 | 6.060  | 4.299  | 5.021  | 12.023 | 9.093  |
| 1 | 0.9355 | 13.526 | 8.865  | 10.953 | 10.631 | 7.897  |
| 1 | 0.9365 | 15.461 | 7.392  | 11.088 | 8.003  | 6.831  |
| 1 | 0.9375 | 20.039 | 13.517 | 16.519 | 8.350  | 9.694  |
| 1 | 0.9385 | 28.851 | 15.614 | 19.581 | 6.377  | 14.381 |
| 1 | 0.9395 | 22.214 | 15.052 | 17.459 | 9.906  | 19.533 |
| 1 | 0.9405 | 31.524 | 14.988 | 20.305 | 12.198 | 23.255 |
| 1 | 0.9415 | 6.955  | 3.975  | 7.043  | 10.391 | 19.566 |
| 1 | 0.9425 | 12.218 | 8.689  | 9.248  | 10.850 | 17.343 |
| 1 | 0.9435 | 16.860 | 12.161 | 15.587 | 10.936 | 11.036 |
| 1 | 0.9445 | 11.888 | 6.248  | 5.547  | 13.021 | 6.899  |
| 1 | 0.9455 | 21.894 | 9.330  | 23.848 | 14.719 | 6.288  |
| 1 | 0.9465 | 36.359 | 12.510 | 25.180 | 16.987 | 13.608 |

|   |        |        |        |        |        |        |
|---|--------|--------|--------|--------|--------|--------|
| 1 | 0.9475 | 16.560 | 8.869  | 9.446  | 13.910 | 15.778 |
| 1 | 0.9485 | 14.978 | 8.800  | 11.050 | 9.772  | 14.384 |
| 1 | 0.9495 | 19.643 | 8.338  | 13.224 | 9.756  | 13.285 |
| 1 | 0.9505 | 13.003 | 9.705  | 10.159 | 8.837  | 8.929  |
| 1 | 0.9515 | 11.816 | 20.158 | 17.279 | 17.380 | 10.074 |
| 1 | 0.9525 | 11.740 | 20.187 | 17.265 | 17.501 | 10.095 |
| 1 | 0.9535 | 9.226  | 4.430  | 8.925  | 6.893  | 4.637  |
| 1 | 0.9545 | 18.625 | 10.240 | 14.592 | 16.503 | 9.996  |
| 1 | 0.9555 | 18.688 | 11.924 | 18.395 | 11.631 | 11.382 |
| 1 | 0.9565 | 19.182 | 16.500 | 22.668 | 15.302 | 16.890 |
| 1 | 0.9575 | 7.327  | 14.850 | 9.074  | 17.417 | 17.032 |
| 1 | 0.9585 | 12.160 | 8.499  | 9.095  | 14.497 | 20.819 |
| 1 | 0.9595 | 24.073 | 22.133 | 25.030 | 21.058 | 20.288 |
| 1 | 0.9605 | 13.880 | 19.226 | 12.285 | 29.245 | 21.436 |
| 1 | 0.9615 | 19.107 | 25.233 | 21.933 | 26.055 | 18.499 |
| 1 | 0.9625 | 10.451 | 14.411 | 10.452 | 21.993 | 11.420 |
| 1 | 0.9635 | 15.163 | 13.727 | 13.454 | 15.212 | 21.016 |
| 1 | 0.9645 | 14.245 | 9.552  | 10.115 | 16.826 | 10.779 |
| 1 | 0.9655 | 18.999 | 11.433 | 14.496 | 14.227 | 17.219 |
| 1 | 0.9665 | 14.051 | 7.039  | 10.374 | 24.491 | 14.125 |
| 1 | 0.9675 | 9.124  | 5.780  | 5.577  | 14.527 | 9.710  |
| 1 | 0.9685 | 5.715  | 10.244 | 5.559  | 23.011 | 18.945 |
| 1 | 0.9695 | 9.945  | 4.471  | 5.632  | 14.429 | 21.559 |
| 1 | 0.9705 | 8.124  | 5.044  | 7.725  | 16.849 | 23.560 |
| 1 | 0.9715 | 7.343  | 10.689 | 9.284  | 16.609 | 26.204 |
| 1 | 0.9725 | 19.439 | 20.260 | 19.843 | 18.487 | 9.019  |
| 1 | 0.9735 | 19.828 | 21.516 | 14.516 | 16.419 | 28.815 |
| 1 | 0.9745 | 15.874 | 13.406 | 20.810 | 19.297 | 26.379 |
| 1 | 0.9755 | 15.788 | 13.389 | 20.735 | 19.227 | 26.354 |
| 1 | 0.9765 | 13.695 | 15.095 | 24.553 | 19.263 | 16.021 |
| 1 | 0.9775 | 19.244 | 19.321 | 17.989 | 18.076 | 12.964 |
| 1 | 0.9785 | 20.093 | 12.178 | 13.454 | 9.042  | 10.739 |
| 1 | 0.9795 | 5.635  | 9.068  | 6.470  | 20.633 | 9.945  |
| 1 | 0.9805 | 17.763 | 18.936 | 23.158 | 20.182 | 19.212 |
| 1 | 0.9815 | 15.414 | 9.693  | 12.440 | 9.539  | 10.968 |
| 1 | 0.9825 | 14.707 | 8.340  | 8.835  | 10.193 | 12.041 |
| 1 | 0.9835 | 15.079 | 11.256 | 7.244  | 8.750  | 12.304 |
| 1 | 0.9845 | 19.589 | 11.016 | 12.737 | 7.954  | 10.244 |
| 1 | 0.9855 | 12.368 | 6.560  | 7.761  | 8.696  | 10.919 |
| 1 | 0.9865 | 16.487 | 12.635 | 12.569 | 9.672  | 14.429 |
| 1 | 0.9875 | 21.843 | 14.570 | 14.688 | 17.858 | 19.734 |
| 1 | 0.9885 | 19.715 | 16.775 | 18.874 | 15.629 | 14.117 |
| 1 | 0.9895 | 17.322 | 15.040 | 15.378 | 22.027 | 12.140 |
| 1 | 0.9905 | 16.446 | 9.592  | 12.919 | 12.843 | 16.243 |
| 1 | 0.9915 | 13.555 | 10.745 | 11.777 | 8.425  | 10.510 |
| 1 | 0.9925 | 13.835 | 13.003 | 11.671 | 17.695 | 10.062 |
| 1 | 0.9935 | 8.990  | 7.089  | 6.347  | 14.059 | 14.674 |
| 1 | 0.9945 | 10.885 | 9.058  | 8.878  | 21.601 | 20.230 |
| 1 | 0.9955 | 12.796 | 12.883 | 8.964  | 13.059 | 18.448 |
| 1 | 0.9965 | 11.619 | 9.471  | 7.992  | 15.660 | 21.740 |

|   |        |        |        |        |        |        |
|---|--------|--------|--------|--------|--------|--------|
| 1 | 0.9975 | 11.612 | 9.468  | 8.047  | 15.928 | 21.789 |
| 1 | 0.9985 | 16.420 | 12.576 | 10.684 | 14.062 | 20.538 |
| 1 | 0.9995 | 19.311 | 10.787 | 14.626 | 17.515 | 19.407 |
| 1 | 1.0005 | 19.967 | 13.797 | 15.282 | 13.407 | 22.869 |
| 1 | 1.0015 | 8.297  | 11.854 | 11.064 | 19.425 | 23.652 |
| 1 | 1.0025 | 18.925 | 15.820 | 19.349 | 11.269 | 11.541 |
| 1 | 1.0035 | 13.915 | 11.510 | 9.112  | 12.110 | 23.731 |
| 1 | 1.0045 | 11.995 | 7.709  | 8.989  | 16.828 | 22.356 |
| 1 | 1.0055 | 8.266  | 9.016  | 9.247  | 10.665 | 10.731 |
| 1 | 1.0065 | 15.162 | 15.354 | 24.041 | 14.801 | 14.304 |
| 1 | 1.0075 | 21.652 | 18.162 | 20.699 | 8.778  | 24.158 |
| 1 | 1.0085 | 3.999  | 4.131  | 3.601  | 8.580  | 5.993  |
| 1 | 1.0095 | 7.086  | 5.071  | 4.151  | 12.306 | 12.200 |
| 1 | 1.0105 | 17.112 | 12.935 | 11.837 | 10.816 | 17.340 |
| 1 | 1.0115 | 24.304 | 15.779 | 20.348 | 21.876 | 19.674 |
| 1 | 1.0125 | 18.043 | 16.342 | 12.508 | 17.335 | 14.676 |
| 1 | 1.0135 | 22.163 | 13.573 | 17.726 | 19.735 | 11.453 |
| 1 | 1.0145 | 15.663 | 5.336  | 11.460 | 22.504 | 16.034 |
| 1 | 1.0155 | 22.044 | 14.748 | 16.548 | 31.089 | 17.566 |
| 1 | 1.0165 | 17.385 | 17.473 | 15.804 | 23.890 | 13.173 |
| 1 | 1.0175 | 14.860 | 7.945  | 10.296 | 13.729 | 11.270 |
| 1 | 1.0185 | 11.629 | 7.566  | 9.714  | 17.864 | 6.006  |
| 1 | 1.0195 | 6.215  | 4.347  | 4.184  | 10.878 | 9.712  |
| 1 | 1.0205 | 8.989  | 9.592  | 7.140  | 12.293 | 3.905  |
| 1 | 1.0215 | 11.810 | 7.450  | 9.794  | 28.036 | 12.952 |
| 1 | 1.0225 | 11.809 | 7.450  | 9.794  | 28.022 | 12.948 |
| 1 | 1.0235 | 7.147  | 7.466  | 7.387  | 30.731 | 9.102  |
| 1 | 1.0245 | 10.201 | 7.774  | 7.118  | 11.864 | 13.368 |
| 1 | 1.0255 | 23.639 | 22.542 | 21.728 | 23.725 | 14.195 |
| 1 | 1.0265 | 17.625 | 5.920  | 16.920 | 23.875 | 9.172  |
| 1 | 1.0275 | 11.344 | 4.385  | 11.212 | 19.752 | 9.036  |
| 1 | 1.0285 | 10.350 | 9.473  | 12.051 | 22.607 | 9.498  |
| 1 | 1.0295 | 9.601  | 2.579  | 8.476  | 12.711 | 11.359 |
| 1 | 1.0305 | 12.704 | 7.733  | 10.452 | 6.890  | 18.813 |
| 1 | 1.0315 | 13.084 | 12.659 | 10.949 | 17.677 | 10.507 |
| 1 | 1.0325 | 17.099 | 7.325  | 9.642  | 11.968 | 11.948 |
| 1 | 1.0335 | 21.930 | 10.938 | 14.908 | 24.447 | 12.620 |
| 1 | 1.0345 | 8.183  | 6.012  | 5.411  | 12.091 | 6.449  |
| 1 | 1.0355 | 17.662 | 9.435  | 17.226 | 26.156 | 10.639 |
| 1 | 1.0365 | 17.211 | 8.282  | 15.070 | 26.317 | 17.344 |
| 1 | 1.0375 | 7.571  | 6.365  | 8.249  | 16.336 | 16.069 |
| 1 | 1.0385 | 15.220 | 16.609 | 10.455 | 16.864 | 11.617 |
| 1 | 1.0395 | 18.445 | 14.961 | 17.346 | 12.444 | 15.334 |
| 1 | 1.0405 | 13.651 | 9.723  | 10.851 | 9.984  | 16.757 |
| 1 | 1.0415 | 13.078 | 5.454  | 10.664 | 14.262 | 18.913 |
| 1 | 1.0425 | 13.604 | 9.975  | 15.618 | 25.722 | 10.122 |
| 1 | 1.0435 | 11.472 | 4.909  | 10.564 | 24.231 | 13.110 |
| 1 | 1.0445 | 19.133 | 7.372  | 12.620 | 24.640 | 10.956 |
| 1 | 1.0455 | 19.827 | 11.541 | 10.199 | 13.193 | 18.607 |
| 1 | 1.0465 | 14.522 | 10.758 | 9.665  | 11.611 | 11.916 |

|   |        |        |        |        |        |        |
|---|--------|--------|--------|--------|--------|--------|
| 1 | 1.0475 | 23.636 | 11.082 | 12.959 | 18.973 | 21.294 |
| 1 | 1.0485 | 7.032  | 3.084  | 4.824  | 16.531 | 6.055  |
| 1 | 1.0495 | 9.757  | 5.000  | 6.927  | 16.166 | 9.310  |
| 1 | 1.0505 | 3.515  | 1.956  | 6.058  | 6.496  | 4.026  |
| 1 | 1.0515 | 11.327 | 6.089  | 15.076 | 14.541 | 9.475  |
| 1 | 1.0525 | 9.358  | 9.799  | 11.052 | 14.426 | 11.873 |
| 1 | 1.0535 | 17.987 | 10.291 | 13.111 | 14.884 | 6.860  |
| 1 | 1.0545 | 14.241 | 9.082  | 11.455 | 25.457 | 11.372 |
| 1 | 1.0555 | 18.858 | 8.472  | 12.713 | 15.771 | 22.712 |
| 1 | 1.0565 | 9.079  | 10.371 | 9.076  | 7.414  | 6.413  |
| 1 | 1.0575 | 8.086  | 6.831  | 7.925  | 11.263 | 10.501 |
| 1 | 1.0585 | 13.445 | 17.252 | 10.911 | 24.263 | 12.210 |
| 1 | 1.0595 | 14.498 | 9.679  | 12.593 | 21.206 | 16.879 |
| 1 | 1.0605 | 21.364 | 15.259 | 16.842 | 29.846 | 19.482 |
| 1 | 1.0615 | 20.399 | 18.077 | 18.395 | 16.085 | 11.394 |
| 1 | 1.0625 | 9.016  | 10.020 | 8.554  | 11.457 | 8.868  |
| 1 | 1.0635 | 16.841 | 12.447 | 10.272 | 25.603 | 19.983 |
| 1 | 1.0645 | 22.556 | 8.941  | 14.031 | 18.221 | 16.807 |
| 1 | 1.0655 | 13.889 | 6.907  | 9.880  | 32.049 | 9.487  |
| 1 | 1.0665 | 11.056 | 9.928  | 8.057  | 25.612 | 11.677 |
| 1 | 1.0675 | 16.189 | 13.679 | 17.819 | 22.524 | 14.414 |
| 1 | 1.0685 | 20.606 | 11.101 | 12.549 | 34.180 | 14.118 |
| 1 | 1.0695 | 20.816 | 9.366  | 16.106 | 12.833 | 8.907  |
| 1 | 1.0705 | 16.559 | 10.408 | 11.951 | 5.374  | 14.692 |
| 1 | 1.0715 | 10.034 | 7.235  | 6.413  | 15.502 | 10.365 |
| 1 | 1.0725 | 2.196  | 1.150  | 2.415  | 6.702  | 3.884  |
| 1 | 1.0735 | 14.856 | 6.827  | 10.503 | 19.035 | 10.861 |
| 1 | 1.0745 | 16.593 | 8.555  | 11.258 | 22.111 | 16.864 |
| 1 | 1.0755 | 18.742 | 4.440  | 8.963  | 29.666 | 16.045 |
| 1 | 1.0765 | 17.878 | 10.336 | 15.439 | 28.187 | 16.945 |
| 1 | 1.0775 | 20.503 | 12.985 | 16.977 | 15.560 | 11.732 |
| 1 | 1.0785 | 12.567 | 12.785 | 14.750 | 22.374 | 16.640 |
| 1 | 1.0795 | 5.659  | 10.263 | 8.395  | 16.422 | 17.839 |
| 1 | 1.0805 | 10.129 | 13.217 | 14.837 | 12.523 | 14.689 |
| 1 | 1.0815 | 9.703  | 9.829  | 11.107 | 18.158 | 24.142 |
| 1 | 1.0825 | 15.018 | 12.274 | 14.298 | 26.693 | 20.730 |
| 1 | 1.0835 | 26.903 | 14.455 | 19.307 | 13.721 | 18.564 |
| 1 | 1.0845 | 12.336 | 9.404  | 9.239  | 19.133 | 13.657 |
| 1 | 1.0855 | 23.309 | 18.610 | 27.376 | 23.501 | 16.952 |
| 1 | 1.0865 | 12.037 | 7.131  | 9.731  | 12.545 | 6.893  |
| 1 | 1.0875 | 10.867 | 6.713  | 5.798  | 21.141 | 5.880  |
| 1 | 1.0885 | 12.290 | 4.232  | 8.395  | 35.545 | 3.741  |
| 1 | 1.0895 | 14.340 | 8.268  | 10.473 | 15.656 | 12.446 |
| 1 | 1.0905 | 14.129 | 7.609  | 12.455 | 15.899 | 10.793 |
| 1 | 1.0915 | 15.446 | 12.420 | 14.286 | 30.035 | 15.855 |
| 1 | 1.0925 | 18.454 | 16.592 | 16.482 | 41.615 | 19.949 |
| 1 | 1.0935 | 9.740  | 10.888 | 11.588 | 13.112 | 22.801 |
| 1 | 1.0945 | 9.547  | 11.487 | 13.676 | 16.491 | 12.471 |
| 1 | 1.0955 | 19.371 | 12.630 | 21.043 | 16.275 | 12.686 |
| 1 | 1.0965 | 20.641 | 17.926 | 23.352 | 16.627 | 17.444 |

|   |        |        |        |        |        |        |
|---|--------|--------|--------|--------|--------|--------|
| 1 | 1.0975 | 13.120 | 16.702 | 12.997 | 27.952 | 21.776 |
| 1 | 1.0985 | 13.944 | 16.016 | 16.374 | 25.798 | 19.546 |
| 1 | 1.0995 | 19.425 | 17.269 | 23.124 | 23.329 | 22.039 |
| 1 | 1.1005 | 24.502 | 14.040 | 25.677 | 16.526 | 15.838 |
| 1 | 1.1015 | 22.267 | 14.036 | 20.485 | 14.193 | 9.396  |
| 1 | 1.1025 | 15.903 | 13.192 | 15.727 | 3.538  | 8.218  |
| 1 | 1.1035 | 16.471 | 11.181 | 16.097 | 23.904 | 11.681 |
| 1 | 1.1045 | 14.437 | 13.379 | 14.971 | 14.216 | 4.628  |
| 1 | 1.1055 | 14.182 | 15.668 | 15.909 | 20.250 | 22.804 |
| 1 | 1.1065 | 8.158  | 12.221 | 12.340 | 19.188 | 22.137 |
| 1 | 1.1075 | 9.618  | 8.838  | 14.102 | 8.719  | 15.681 |
| 1 | 1.1085 | 16.035 | 7.962  | 17.013 | 17.611 | 20.913 |
| 1 | 1.1095 | 15.256 | 10.917 | 16.777 | 10.815 | 16.450 |
| 1 | 1.1105 | 12.196 | 11.035 | 13.058 | 14.859 | 10.496 |
| 1 | 1.1115 | 13.164 | 9.598  | 16.124 | 12.361 | 9.468  |
| 1 | 1.1125 | 29.597 | 11.744 | 24.377 | 17.689 | 7.834  |
| 1 | 1.1135 | 22.195 | 18.729 | 22.117 | 21.116 | 16.769 |
| 1 | 1.1145 | 12.201 | 15.351 | 15.964 | 14.117 | 20.419 |
| 1 | 1.1155 | 14.485 | 16.406 | 16.539 | 9.888  | 18.339 |
| 1 | 1.1165 | 22.073 | 15.553 | 20.517 | 17.066 | 13.597 |
| 1 | 1.1175 | 7.435  | 6.938  | 6.448  | 17.699 | 11.559 |
| 1 | 1.1185 | 2.749  | 6.494  | 6.200  | 20.684 | 15.355 |
| 1 | 1.1195 | 4.325  | 11.464 | 6.260  | 27.110 | 12.730 |
| 1 | 1.1205 | 6.835  | 10.744 | 10.603 | 21.218 | 11.932 |
| 1 | 1.1215 | 11.634 | 9.103  | 11.268 | 25.446 | 15.328 |
| 1 | 1.1225 | 20.334 | 16.827 | 11.777 | 7.985  | 18.623 |
| 1 | 1.1235 | 4.126  | 4.965  | 4.105  | 6.134  | 17.942 |
| 1 | 1.1245 | 7.793  | 0.878  | 4.380  | 11.819 | 20.419 |
| 1 | 1.1255 | 5.360  | 1.086  | 5.930  | 7.216  | 7.912  |
| 1 | 1.1265 | 10.434 | 5.547  | 13.655 | 4.118  | 10.324 |
| 1 | 1.1275 | 10.993 | 8.796  | 9.207  | 5.596  | 18.698 |
| 1 | 1.1285 | 6.148  | 5.644  | 6.616  | 5.075  | 11.506 |
| 1 | 1.1295 | 6.099  | 5.614  | 6.536  | 5.129  | 11.635 |
| 1 | 1.1305 | 19.183 | 15.771 | 26.381 | 6.610  | 20.780 |
| 1 | 1.1315 | 11.666 | 18.558 | 18.168 | 15.736 | 20.698 |
| 1 | 1.1325 | 17.928 | 11.003 | 11.641 | 14.004 | 14.842 |
| 1 | 1.1335 | 16.122 | 13.187 | 13.480 | 16.727 | 19.158 |
| 1 | 1.1345 | 16.241 | 8.576  | 17.547 | 15.891 | 14.173 |
| 1 | 1.1355 | 14.182 | 13.228 | 15.445 | 6.367  | 5.924  |
| 1 | 1.1365 | 25.404 | 17.755 | 23.418 | 15.874 | 12.611 |
| 1 | 1.1375 | 15.655 | 12.557 | 15.620 | 12.467 | 14.563 |
| 1 | 1.1385 | 9.198  | 8.522  | 11.779 | 8.029  | 15.572 |
| 1 | 1.1395 | 10.253 | 18.481 | 17.983 | 12.778 | 18.005 |
| 1 | 1.1405 | 25.424 | 32.820 | 34.203 | 12.653 | 25.394 |
| 1 | 1.1415 | 20.562 | 8.531  | 20.015 | 18.429 | 7.341  |
| 1 | 1.1425 | 20.702 | 12.737 | 21.665 | 22.171 | 11.793 |
| 1 | 1.1435 | 14.777 | 7.168  | 14.021 | 12.990 | 17.119 |
| 1 | 1.1445 | 15.912 | 16.756 | 17.394 | 10.656 | 14.253 |
| 1 | 1.1455 | 13.270 | 10.592 | 10.819 | 10.330 | 12.486 |
| 1 | 1.1465 | 8.186  | 8.595  | 6.857  | 16.145 | 8.403  |

|   |        |        |        |        |        |        |
|---|--------|--------|--------|--------|--------|--------|
| 1 | 1.1475 | 11.764 | 17.817 | 16.792 | 21.220 | 10.092 |
| 1 | 1.1485 | 14.327 | 10.807 | 18.009 | 11.124 | 11.953 |
| 1 | 1.1495 | 7.430  | 9.474  | 9.035  | 22.699 | 12.302 |
| 1 | 1.1505 | 8.706  | 9.325  | 9.178  | 13.699 | 15.193 |
| 1 | 1.1515 | 7.500  | 14.087 | 8.950  | 19.370 | 21.896 |
| 1 | 1.1525 | 17.618 | 12.274 | 14.565 | 19.153 | 15.324 |
| 1 | 1.1535 | 15.027 | 13.788 | 15.923 | 9.929  | 18.438 |
| 1 | 1.1545 | 14.616 | 12.506 | 11.353 | 7.660  | 16.104 |
| 1 | 1.1555 | 19.769 | 16.886 | 20.245 | 15.416 | 18.970 |
| 1 | 1.1565 | 13.562 | 14.172 | 13.633 | 9.193  | 14.138 |
| 1 | 1.1575 | 13.920 | 14.754 | 20.630 | 9.143  | 7.139  |
| 1 | 1.1585 | 17.794 | 10.791 | 18.814 | 6.311  | 20.503 |
| 1 | 1.1595 | 12.841 | 14.938 | 17.248 | 8.798  | 11.537 |
| 1 | 1.1605 | 13.291 | 16.027 | 16.359 | 8.486  | 5.994  |
| 1 | 1.1615 | 10.952 | 9.073  | 11.630 | 13.310 | 19.766 |
| 1 | 1.1625 | 6.175  | 3.837  | 7.094  | 14.689 | 21.411 |
| 1 | 1.1635 | 12.112 | 8.024  | 14.392 | 12.430 | 29.480 |
| 1 | 1.1645 | 6.733  | 12.582 | 10.182 | 17.958 | 37.159 |
| 1 | 1.1655 | 3.376  | 6.472  | 9.390  | 7.240  | 26.207 |
| 1 | 1.1665 | 4.254  | 5.666  | 5.921  | 12.562 | 7.917  |
| 1 | 1.1675 | 10.947 | 11.354 | 18.078 | 6.328  | 8.741  |
| 1 | 1.1685 | 15.340 | 11.817 | 21.960 | 8.650  | 16.796 |
| 1 | 1.1695 | 16.124 | 9.597  | 18.164 | 8.958  | 10.031 |
| 1 | 1.1705 | 9.896  | 6.781  | 8.711  | 8.760  | 10.374 |
| 1 | 1.1715 | 12.771 | 10.741 | 12.765 | 6.723  | 15.405 |
| 1 | 1.1725 | 13.235 | 15.347 | 17.941 | 12.597 | 16.241 |
| 1 | 1.1735 | 16.664 | 10.742 | 18.518 | 17.262 | 24.712 |
| 1 | 1.1745 | 5.579  | 11.086 | 10.240 | 17.186 | 15.432 |
| 1 | 1.1755 | 5.025  | 8.462  | 7.263  | 22.162 | 10.603 |
| 1 | 1.1765 | 13.988 | 13.533 | 12.010 | 14.024 | 12.745 |
| 1 | 1.1775 | 21.637 | 16.290 | 20.794 | 6.907  | 16.235 |
| 1 | 1.1785 | 21.044 | 14.867 | 18.742 | 15.210 | 13.778 |
| 1 | 1.1795 | 24.799 | 19.659 | 22.204 | 17.556 | 22.833 |
| 1 | 1.1805 | 21.606 | 12.747 | 19.249 | 12.772 | 13.831 |
| 1 | 1.1815 | 15.481 | 16.836 | 15.961 | 13.889 | 16.995 |
| 1 | 1.1825 | 19.545 | 11.559 | 16.331 | 10.819 | 10.900 |
| 1 | 1.1835 | 14.659 | 15.578 | 16.203 | 14.580 | 12.138 |
| 1 | 1.1845 | 16.379 | 11.798 | 14.184 | 16.825 | 11.256 |
| 1 | 1.1855 | 9.022  | 5.545  | 10.494 | 3.545  | 8.718  |
| 1 | 1.1865 | 15.596 | 11.817 | 15.925 | 13.557 | 16.695 |
| 1 | 1.1875 | 18.944 | 15.366 | 23.723 | 16.135 | 27.091 |
| 1 | 1.1885 | 19.568 | 18.511 | 16.261 | 15.982 | 17.359 |
| 1 | 1.1895 | 13.910 | 13.026 | 12.392 | 11.092 | 19.735 |
| 1 | 1.1905 | 20.906 | 18.964 | 15.867 | 10.533 | 19.238 |
| 1 | 1.1915 | 21.831 | 19.290 | 21.949 | 14.356 | 24.231 |
| 1 | 1.1925 | 16.317 | 11.981 | 18.246 | 17.161 | 26.315 |
| 1 | 1.1935 | 29.607 | 17.177 | 22.547 | 17.480 | 24.647 |
| 1 | 1.1945 | 31.329 | 17.859 | 20.122 | 16.163 | 15.396 |
| 1 | 1.1955 | 21.815 | 17.321 | 22.599 | 13.348 | 14.511 |
| 1 | 1.1965 | 12.943 | 14.682 | 17.650 | 12.889 | 9.466  |

|   |        |        |        |        |        |        |
|---|--------|--------|--------|--------|--------|--------|
| 1 | 1.1975 | 15.154 | 10.236 | 14.061 | 12.252 | 11.241 |
| 1 | 1.1985 | 17.912 | 9.932  | 15.962 | 13.857 | 19.314 |
| 1 | 1.1995 | 14.960 | 6.584  | 13.627 | 10.897 | 15.317 |
| 1 | 1.2005 | 23.494 | 10.231 | 17.719 | 10.266 | 19.507 |
| 1 | 1.2015 | 15.335 | 14.994 | 20.401 | 25.164 | 23.709 |
| 1 | 1.2025 | 9.756  | 11.853 | 11.473 | 22.382 | 11.298 |
| 1 | 1.2035 | 19.238 | 20.994 | 29.097 | 23.644 | 19.941 |
| 1 | 1.2045 | 19.316 | 19.606 | 31.234 | 16.756 | 18.212 |
| 1 | 1.2055 | 20.075 | 18.714 | 22.996 | 23.442 | 25.123 |
| 1 | 1.2065 | 14.907 | 12.657 | 20.105 | 20.880 | 26.708 |
| 1 | 1.2075 | 18.697 | 17.991 | 20.801 | 24.461 | 16.580 |
| 1 | 1.2085 | 24.122 | 21.499 | 29.545 | 15.119 | 9.278  |
| 1 | 1.2095 | 27.133 | 21.248 | 27.117 | 11.746 | 21.439 |
| 1 | 1.2105 | 10.467 | 10.957 | 18.346 | 20.365 | 16.789 |
| 1 | 1.2115 | 25.222 | 13.185 | 25.162 | 10.955 | 23.640 |
| 1 | 1.2125 | 20.710 | 16.871 | 17.764 | 8.018  | 16.815 |
| 1 | 1.2135 | 23.168 | 22.705 | 16.776 | 16.525 | 29.290 |
| 1 | 1.2145 | 11.423 | 13.509 | 15.203 | 11.899 | 19.812 |
| 1 | 1.2155 | 19.137 | 18.166 | 17.925 | 10.736 | 25.108 |
| 1 | 1.2165 | 11.034 | 13.688 | 13.119 | 17.885 | 9.284  |
| 1 | 1.2175 | 17.857 | 17.874 | 18.092 | 16.140 | 13.977 |
| 1 | 1.2185 | 17.740 | 17.775 | 18.090 | 16.402 | 14.105 |
| 1 | 1.2195 | 17.774 | 21.422 | 24.324 | 17.349 | 23.810 |
| 1 | 1.2205 | 19.540 | 24.034 | 23.297 | 16.909 | 19.024 |
| 1 | 1.2215 | 21.388 | 18.185 | 18.811 | 21.133 | 21.283 |
| 1 | 1.2225 | 18.732 | 24.392 | 14.563 | 19.332 | 14.160 |
| 1 | 1.2235 | 31.987 | 24.636 | 30.210 | 18.496 | 20.608 |
| 1 | 1.2245 | 22.892 | 20.834 | 23.158 | 17.206 | 19.865 |
| 1 | 1.2255 | 10.540 | 17.695 | 11.842 | 25.035 | 19.472 |
| 1 | 1.2265 | 20.763 | 19.881 | 22.380 | 16.286 | 23.983 |
| 1 | 1.2275 | 37.680 | 31.351 | 28.764 | 13.436 | 24.014 |
| 1 | 1.2285 | 21.816 | 15.364 | 18.581 | 15.186 | 20.320 |
| 1 | 1.2295 | 32.807 | 15.239 | 24.231 | 14.058 | 24.457 |
| 1 | 1.2305 | 12.233 | 16.072 | 14.803 | 18.284 | 27.245 |
| 1 | 1.2315 | 12.072 | 20.631 | 9.982  | 17.470 | 8.039  |
| 1 | 1.2325 | 20.695 | 25.824 | 24.183 | 11.949 | 26.658 |
| 1 | 1.2335 | 22.758 | 31.338 | 27.367 | 15.685 | 16.610 |
| 1 | 1.2345 | 44.504 | 41.457 | 37.673 | 29.553 | 23.164 |
| 1 | 1.2355 | 25.230 | 21.219 | 17.520 | 13.614 | 16.359 |
| 1 | 1.2365 | 20.337 | 18.267 | 13.393 | 17.034 | 20.418 |
| 1 | 1.2375 | 6.712  | 13.476 | 6.996  | 17.224 | 13.817 |
| 1 | 1.2385 | 17.957 | 10.349 | 13.154 | 10.621 | 10.781 |
| 1 | 1.2395 | 16.299 | 12.837 | 12.172 | 11.050 | 13.264 |
| 1 | 1.2405 | 22.493 | 12.653 | 14.565 | 3.491  | 12.123 |
| 1 | 1.2415 | 8.648  | 4.295  | 8.547  | 12.617 | 20.634 |
| 1 | 1.2425 | 16.505 | 17.120 | 11.056 | 24.525 | 10.331 |
| 1 | 1.2435 | 20.664 | 17.100 | 12.288 | 21.761 | 19.236 |
| 1 | 1.2445 | 33.047 | 29.602 | 19.006 | 21.330 | 45.477 |
| 1 | 1.2455 | 22.655 | 25.440 | 17.130 | 25.285 | 30.810 |
| 1 | 1.2465 | 28.136 | 14.845 | 20.992 | 31.292 | 27.022 |

|   |        |        |        |        |        |        |
|---|--------|--------|--------|--------|--------|--------|
| 1 | 1.2475 | 18.171 | 14.193 | 13.793 | 10.170 | 25.375 |
| 1 | 1.2485 | 12.954 | 11.075 | 15.416 | 17.078 | 16.969 |
| 1 | 1.2495 | 13.199 | 6.829  | 12.334 | 19.133 | 16.824 |
| 1 | 1.2505 | 6.499  | 6.802  | 7.020  | 25.122 | 25.222 |
| 1 | 1.2515 | 14.976 | 16.831 | 11.311 | 16.692 | 26.732 |
| 1 | 1.2525 | 21.562 | 28.428 | 17.759 | 23.744 | 16.144 |
| 1 | 1.2535 | 22.649 | 27.154 | 17.268 | 22.613 | 17.965 |
| 1 | 1.2545 | 40.219 | 38.423 | 26.407 | 12.406 | 21.364 |
| 1 | 1.2555 | 26.749 | 29.284 | 19.621 | 11.851 | 23.738 |
| 1 | 1.2565 | 21.414 | 23.476 | 20.508 | 29.469 | 25.911 |
| 1 | 1.2575 | 19.705 | 19.643 | 18.290 | 18.571 | 30.186 |
| 1 | 1.2585 | 23.020 | 23.563 | 15.700 | 17.083 | 20.534 |
| 1 | 1.2595 | 18.440 | 16.053 | 15.932 | 19.743 | 23.290 |
| 1 | 1.2605 | 24.876 | 23.764 | 18.579 | 18.679 | 18.879 |
| 1 | 1.2615 | 24.393 | 20.431 | 17.679 | 11.037 | 20.252 |
| 1 | 1.2625 | 16.969 | 12.842 | 14.509 | 14.900 | 17.370 |
| 1 | 1.2635 | 33.269 | 23.885 | 24.003 | 17.284 | 22.817 |
| 1 | 1.2645 | 27.104 | 24.564 | 27.404 | 20.859 | 20.855 |
| 1 | 1.2655 | 12.254 | 11.145 | 15.945 | 15.521 | 16.466 |
| 1 | 1.2665 | 7.777  | 10.031 | 4.917  | 31.602 | 8.287  |
| 1 | 1.2675 | 17.519 | 19.950 | 11.025 | 33.849 | 17.074 |
| 1 | 1.2685 | 11.444 | 24.349 | 14.726 | 29.767 | 16.374 |
| 1 | 1.2695 | 10.372 | 12.620 | 11.921 | 20.197 | 20.573 |
| 1 | 1.2705 | 25.225 | 21.011 | 19.619 | 27.908 | 28.674 |
| 1 | 1.2715 | 23.807 | 24.308 | 12.167 | 23.359 | 31.753 |
| 1 | 1.2725 | 22.032 | 23.310 | 12.293 | 18.188 | 24.125 |
| 1 | 1.2735 | 12.934 | 16.733 | 10.402 | 22.172 | 21.361 |
| 1 | 1.2745 | 14.335 | 17.867 | 13.527 | 15.145 | 13.606 |
| 1 | 1.2755 | 12.981 | 17.108 | 13.283 | 11.587 | 21.462 |
| 1 | 1.2765 | 34.688 | 25.825 | 17.685 | 18.068 | 31.594 |
| 1 | 1.2775 | 34.650 | 25.824 | 17.704 | 18.048 | 31.595 |
| 1 | 1.2785 | 11.571 | 12.823 | 9.098  | 18.983 | 38.722 |
| 1 | 1.2795 | 11.510 | 12.882 | 9.120  | 19.031 | 38.912 |
| 1 | 1.2805 | 15.953 | 10.233 | 10.128 | 5.838  | 21.935 |
| 1 | 1.2815 | 14.801 | 17.054 | 11.598 | 11.281 | 11.656 |
| 1 | 1.2825 | 9.822  | 11.405 | 9.626  | 15.832 | 9.904  |
| 1 | 1.2835 | 4.133  | 9.241  | 4.131  | 14.402 | 6.988  |
| 1 | 1.2845 | 6.152  | 8.578  | 3.214  | 16.708 | 11.492 |
| 1 | 1.2855 | 8.700  | 7.326  | 8.133  | 9.946  | 10.379 |
| 1 | 1.2865 | 15.006 | 19.002 | 16.387 | 13.942 | 5.156  |
| 1 | 1.2875 | 18.766 | 23.616 | 15.584 | 14.088 | 27.172 |
| 1 | 1.2885 | 7.292  | 11.064 | 5.383  | 10.966 | 9.215  |
| 1 | 1.2895 | 6.540  | 16.365 | 11.750 | 15.399 | 24.773 |
| 1 | 1.2905 | 15.107 | 16.274 | 19.476 | 22.741 | 13.945 |
| 1 | 1.2915 | 15.105 | 15.730 | 14.882 | 18.232 | 20.093 |
| 1 | 1.2925 | 8.247  | 19.047 | 16.908 | 21.427 | 20.737 |
| 1 | 1.2935 | 3.255  | 12.134 | 6.860  | 20.110 | 16.273 |
| 1 | 1.2945 | 6.347  | 14.063 | 11.927 | 21.102 | 18.310 |
| 1 | 1.2955 | 26.951 | 24.286 | 18.623 | 28.841 | 24.978 |
| 1 | 1.2965 | 14.126 | 20.551 | 13.852 | 31.638 | 35.456 |



|   |        |        |        |        |        |        |
|---|--------|--------|--------|--------|--------|--------|
| 1 | 1.2975 | 11.398 | 19.298 | 16.668 | 18.764 | 21.610 |
| 1 | 1.2985 | 21.353 | 18.572 | 21.749 | 7.430  | 18.173 |
| 1 | 1.2995 | 9.683  | 14.269 | 13.094 | 9.284  | 22.291 |
| 1 | 1.3005 | 1.520  | 5.402  | 5.234  | 2.577  | 8.043  |
| 1 | 1.3015 | 1.718  | 6.075  | 4.245  | 2.941  | 3.089  |
| 1 | 1.3025 | 2.031  | 3.631  | 2.657  | 2.970  | 2.709  |
| 1 | 1.3035 | 1.032  | 5.621  | 2.204  | 6.178  | 2.802  |
| 1 | 1.3045 | 1.069  | 7.077  | 3.295  | 7.268  | 2.941  |
| 1 | 1.3055 | 19.192 | 22.790 | 19.664 | 18.999 | 14.953 |
| 1 | 1.3065 | 15.225 | 23.855 | 19.792 | 23.175 | 16.393 |
| 1 | 1.3075 | 15.054 | 17.159 | 10.870 | 9.497  | 10.903 |
| 1 | 1.3085 | 15.998 | 19.824 | 15.069 | 19.154 | 11.724 |
| 1 | 1.3095 | 16.018 | 19.861 | 15.080 | 19.169 | 11.739 |
| 1 | 1.3105 | 14.520 | 18.837 | 17.287 | 26.322 | 22.618 |
| 1 | 1.3115 | 8.468  | 15.143 | 9.480  | 21.217 | 25.496 |
| 1 | 1.3125 | 12.470 | 20.825 | 12.065 | 23.744 | 25.925 |
| 1 | 1.3135 | 18.913 | 19.171 | 14.995 | 21.936 | 12.161 |
| 1 | 1.3145 | 19.108 | 21.141 | 16.724 | 9.025  | 12.418 |
| 1 | 1.3155 | 9.658  | 8.902  | 9.678  | 11.254 | 12.535 |
| 1 | 1.3165 | 9.257  | 12.072 | 12.339 | 19.332 | 14.838 |
| 1 | 1.3175 | 26.761 | 15.294 | 28.076 | 19.062 | 20.557 |
| 1 | 1.3185 | 11.299 | 17.387 | 14.562 | 10.952 | 22.386 |
| 1 | 1.3195 | 22.204 | 23.716 | 22.539 | 13.055 | 27.367 |
| 1 | 1.3205 | 21.416 | 20.658 | 20.331 | 21.867 | 19.092 |
| 1 | 1.3215 | 18.851 | 23.319 | 19.919 | 20.698 | 11.609 |
| 1 | 1.3225 | 14.551 | 12.644 | 14.282 | 10.574 | 15.533 |
| 1 | 1.3235 | 7.770  | 9.991  | 6.978  | 13.106 | 14.523 |
| 1 | 1.3245 | 9.275  | 13.090 | 9.371  | 5.237  | 9.292  |
| 1 | 1.3255 | 19.132 | 26.830 | 20.805 | 14.963 | 24.886 |
| 1 | 1.3265 | 11.351 | 7.937  | 10.889 | 4.372  | 21.112 |
| 1 | 1.3275 | 7.469  | 10.877 | 11.166 | 5.258  | 8.412  |
| 1 | 1.3285 | 22.260 | 29.196 | 26.824 | 11.170 | 9.651  |
| 1 | 1.3295 | 27.079 | 32.113 | 25.845 | 16.811 | 15.927 |
| 1 | 1.3305 | 14.712 | 15.931 | 14.209 | 9.502  | 5.903  |
| 1 | 1.3315 | 18.147 | 14.065 | 16.196 | 10.550 | 16.446 |
| 1 | 1.3325 | 10.248 | 13.095 | 10.299 | 5.757  | 3.742  |
| 1 | 1.3335 | 14.555 | 14.486 | 12.948 | 4.316  | 11.987 |
| 1 | 1.3345 | 5.556  | 10.316 | 7.298  | 10.137 | 13.938 |
| 1 | 1.3355 | 14.955 | 15.899 | 12.441 | 15.403 | 10.379 |
| 1 | 1.3365 | 13.249 | 19.307 | 11.089 | 16.170 | 15.432 |
| 1 | 1.3375 | 26.231 | 30.937 | 28.268 | 24.254 | 23.278 |
| 1 | 1.3385 | 13.295 | 10.391 | 16.196 | 14.107 | 12.871 |
| 1 | 1.3395 | 21.750 | 14.082 | 21.625 | 15.818 | 7.221  |
| 1 | 1.3405 | 14.521 | 16.162 | 20.070 | 16.074 | 7.875  |
| 1 | 1.3415 | 25.307 | 17.316 | 22.208 | 9.113  | 23.467 |
| 1 | 1.3425 | 23.082 | 27.315 | 30.065 | 12.077 | 12.890 |
| 1 | 1.3435 | 8.946  | 12.516 | 8.657  | 9.701  | 9.969  |
| 1 | 1.3445 | 10.921 | 10.051 | 10.447 | 8.782  | 10.741 |
| 1 | 1.3455 | 19.530 | 12.772 | 18.130 | 7.527  | 15.224 |
| 1 | 1.3465 | 20.072 | 14.899 | 18.840 | 10.954 | 20.980 |

|   |        |        |        |        |        |        |
|---|--------|--------|--------|--------|--------|--------|
| 1 | 1.3475 | 17.275 | 16.849 | 18.236 | 8.305  | 15.712 |
| 1 | 1.3485 | 17.871 | 21.336 | 16.878 | 18.728 | 18.581 |
| 1 | 1.3495 | 17.758 | 21.328 | 16.800 | 18.782 | 18.706 |
| 1 | 1.3505 | 17.422 | 13.063 | 19.307 | 4.657  | 13.450 |
| 1 | 1.3515 | 18.696 | 20.794 | 20.385 | 10.055 | 18.178 |
| 1 | 1.3525 | 14.249 | 14.880 | 19.524 | 6.910  | 12.205 |
| 1 | 1.3535 | 12.306 | 14.120 | 11.749 | 20.283 | 20.572 |
| 1 | 1.3545 | 27.974 | 27.187 | 30.013 | 5.888  | 14.516 |
| 1 | 1.3555 | 32.124 | 23.942 | 33.531 | 16.662 | 18.655 |
| 1 | 1.3565 | 16.666 | 13.704 | 16.934 | 7.896  | 19.649 |
| 1 | 1.3575 | 8.113  | 8.167  | 12.060 | 9.259  | 17.250 |
| 1 | 1.3585 | 13.560 | 14.176 | 11.437 | 16.577 | 13.924 |
| 1 | 1.3595 | 12.891 | 16.276 | 17.669 | 11.752 | 24.263 |
| 1 | 1.3605 | 13.316 | 17.345 | 22.166 | 15.706 | 19.734 |
| 1 | 1.3615 | 21.411 | 19.378 | 33.908 | 14.056 | 16.241 |
| 1 | 1.3625 | 13.754 | 6.152  | 8.408  | 11.002 | 23.680 |
| 1 | 1.3635 | 19.131 | 22.389 | 13.389 | 24.974 | 25.698 |
| 1 | 1.3645 | 19.114 | 22.327 | 13.351 | 24.991 | 25.737 |
| 1 | 1.3655 | 22.925 | 11.964 | 23.404 | 8.607  | 6.018  |
| 1 | 1.3665 | 21.963 | 16.928 | 26.902 | 9.622  | 9.843  |
| 1 | 1.3675 | 28.802 | 26.515 | 34.105 | 17.441 | 21.641 |
| 1 | 1.3685 | 15.573 | 8.698  | 10.936 | 16.822 | 17.228 |
| 1 | 1.3695 | 15.562 | 8.665  | 10.927 | 16.782 | 17.229 |
| 1 | 1.3705 | 21.930 | 16.966 | 20.978 | 11.884 | 16.045 |
| 1 | 1.3715 | 18.055 | 17.917 | 19.029 | 9.287  | 14.078 |
| 1 | 1.3725 | 27.296 | 19.321 | 24.450 | 10.353 | 8.007  |
| 1 | 1.3735 | 8.243  | 6.329  | 11.248 | 5.046  | 3.334  |
| 1 | 1.3745 | 26.400 | 14.834 | 27.605 | 13.303 | 11.817 |
| 1 | 1.3755 | 26.355 | 20.095 | 28.801 | 27.798 | 16.771 |
| 1 | 1.3765 | 23.547 | 14.913 | 23.738 | 21.631 | 22.048 |
| 1 | 1.3775 | 18.342 | 21.354 | 23.803 | 34.154 | 27.162 |
| 1 | 1.3785 | 23.085 | 17.935 | 27.637 | 19.343 | 18.170 |
| 1 | 1.3795 | 15.300 | 18.028 | 20.683 | 21.822 | 21.970 |
| 1 | 1.3805 | 19.986 | 16.212 | 23.485 | 18.284 | 16.265 |
| 1 | 1.3815 | 13.564 | 25.171 | 18.446 | 25.282 | 14.797 |
| 1 | 1.3825 | 17.232 | 14.678 | 20.478 | 8.651  | 16.623 |
| 1 | 1.3835 | 21.281 | 12.783 | 23.084 | 13.749 | 8.952  |
| 1 | 1.3845 | 9.774  | 8.028  | 12.282 | 16.145 | 12.678 |
| 1 | 1.3855 | 23.405 | 15.028 | 25.513 | 16.757 | 14.788 |
| 1 | 1.3865 | 26.466 | 25.077 | 34.912 | 15.152 | 10.763 |
| 1 | 1.3875 | 25.251 | 24.024 | 26.553 | 24.153 | 15.199 |
| 1 | 1.3885 | 21.484 | 18.741 | 24.916 | 28.675 | 13.738 |
| 1 | 1.3895 | 19.960 | 23.320 | 22.370 | 27.080 | 18.927 |
| 1 | 1.3905 | 22.999 | 15.545 | 24.038 | 11.487 | 24.393 |
| 1 | 1.3915 | 18.297 | 15.004 | 22.814 | 21.453 | 12.822 |
| 1 | 1.3925 | 18.212 | 14.910 | 17.837 | 16.454 | 28.852 |
| 1 | 1.3935 | 20.916 | 15.696 | 10.659 | 16.120 | 26.744 |
| 1 | 1.3945 | 19.309 | 16.926 | 14.765 | 24.601 | 8.981  |
| 1 | 1.3955 | 17.408 | 14.923 | 8.239  | 27.472 | 27.423 |
| 1 | 1.3965 | 24.109 | 13.117 | 15.274 | 25.921 | 26.304 |

|   |        |        |        |        |        |        |
|---|--------|--------|--------|--------|--------|--------|
| 1 | 1.3975 | 18.612 | 13.180 | 19.944 | 19.931 | 14.298 |
| 1 | 1.3985 | 26.189 | 15.427 | 21.028 | 28.064 | 17.583 |
| 1 | 1.3995 | 21.219 | 13.487 | 20.640 | 18.932 | 27.592 |
| 1 | 1.4005 | 9.211  | 12.778 | 9.878  | 23.014 | 20.053 |
| 1 | 1.4015 | 11.568 | 9.748  | 9.115  | 13.048 | 22.005 |
| 1 | 1.4025 | 11.691 | 16.696 | 11.369 | 21.546 | 22.402 |
| 1 | 1.4035 | 7.355  | 13.912 | 11.157 | 16.842 | 20.893 |
| 1 | 1.4045 | 18.885 | 27.107 | 26.131 | 28.983 | 22.602 |
| 1 | 1.4055 | 14.534 | 18.554 | 19.454 | 11.123 | 16.172 |
| 1 | 1.4065 | 11.486 | 10.413 | 13.145 | 13.083 | 16.445 |
| 1 | 1.4075 | 8.376  | 9.683  | 10.534 | 5.591  | 4.414  |
| 1 | 1.4085 | 11.258 | 13.255 | 17.649 | 21.091 | 20.604 |
| 1 | 1.4095 | 22.058 | 19.533 | 25.429 | 17.200 | 20.131 |
| 1 | 1.4105 | 15.300 | 18.739 | 19.330 | 16.129 | 22.804 |
| 1 | 1.4115 | 14.465 | 14.048 | 13.379 | 14.824 | 20.582 |
| 1 | 1.4125 | 13.793 | 11.318 | 13.101 | 13.782 | 13.539 |
| 1 | 1.4135 | 19.923 | 20.344 | 17.735 | 21.633 | 21.709 |
| 1 | 1.4145 | 12.219 | 11.256 | 14.875 | 8.337  | 18.961 |
| 1 | 1.4155 | 3.672  | 5.611  | 5.300  | 3.920  | 14.045 |
| 1 | 1.4165 | 20.393 | 20.790 | 24.489 | 15.961 | 23.077 |
| 1 | 1.4175 | 12.776 | 8.432  | 14.926 | 24.394 | 20.593 |
| 1 | 1.4185 | 16.259 | 16.198 | 17.946 | 22.194 | 19.385 |
| 1 | 1.4195 | 15.170 | 16.963 | 17.805 | 15.508 | 27.345 |
| 1 | 1.4205 | 9.532  | 11.993 | 13.534 | 15.070 | 4.107  |
| 1 | 1.4215 | 11.293 | 7.840  | 5.819  | 22.015 | 15.333 |
| 1 | 1.4225 | 6.745  | 8.125  | 6.166  | 30.937 | 15.993 |
| 1 | 1.4235 | 5.757  | 10.545 | 3.599  | 18.568 | 17.412 |
| 1 | 1.4245 | 9.006  | 14.098 | 13.046 | 13.954 | 13.209 |
| 1 | 1.4255 | 12.933 | 15.133 | 14.081 | 16.401 | 22.814 |
| 1 | 1.4265 | 7.782  | 11.487 | 5.467  | 3.615  | 14.001 |
| 1 | 1.4275 | 15.536 | 11.337 | 15.449 | 16.164 | 17.133 |
| 1 | 1.4285 | 8.950  | 10.756 | 14.266 | 7.210  | 13.317 |
| 1 | 1.4295 | 3.381  | 9.745  | 11.067 | 10.979 | 17.669 |
| 1 | 1.4305 | 13.154 | 13.641 | 18.933 | 10.646 | 21.570 |
| 1 | 1.4315 | 15.128 | 13.592 | 23.652 | 6.167  | 18.802 |
| 1 | 1.4325 | 9.456  | 12.470 | 12.603 | 6.584  | 10.288 |
| 1 | 1.4335 | 14.671 | 15.464 | 11.273 | 7.685  | 21.049 |
| 1 | 1.4345 | 16.918 | 18.494 | 16.989 | 12.674 | 32.257 |
| 1 | 1.4355 | 16.453 | 16.776 | 12.236 | 11.055 | 13.613 |
| 1 | 1.4365 | 18.832 | 18.789 | 17.135 | 19.022 | 22.679 |
| 1 | 1.4375 | 13.317 | 9.229  | 11.674 | 13.401 | 26.084 |
| 1 | 1.4385 | 13.287 | 9.198  | 11.625 | 13.411 | 26.133 |
| 1 | 1.4395 | 10.718 | 9.526  | 13.095 | 11.530 | 16.194 |
| 1 | 1.4405 | 8.732  | 6.536  | 5.278  | 10.285 | 29.294 |
| 1 | 1.4415 | 5.429  | 4.725  | 7.135  | 5.755  | 22.362 |
| 1 | 1.4425 | 7.171  | 4.847  | 3.481  | 9.574  | 13.305 |
| 1 | 1.4435 | 13.565 | 16.556 | 13.182 | 15.635 | 24.222 |
| 1 | 1.4445 | 14.261 | 20.274 | 18.053 | 17.885 | 14.680 |
| 1 | 1.4455 | 8.738  | 11.479 | 9.756  | 13.490 | 14.819 |
| 1 | 1.4465 | 16.566 | 13.142 | 15.013 | 14.093 | 19.623 |

|   |        |        |        |        |        |        |
|---|--------|--------|--------|--------|--------|--------|
| 1 | 1.4475 | 24.397 | 25.917 | 31.224 | 14.359 | 15.314 |
| 1 | 1.4485 | 17.139 | 26.414 | 22.559 | 17.956 | 11.336 |
| 1 | 1.4495 | 16.204 | 21.771 | 18.241 | 15.768 | 11.657 |
| 1 | 1.4505 | 13.048 | 8.054  | 10.677 | 8.533  | 5.668  |
| 1 | 1.4515 | 18.345 | 16.005 | 18.396 | 15.682 | 12.530 |
| 1 | 1.4525 | 11.443 | 13.627 | 14.837 | 17.811 | 27.100 |
| 1 | 1.4535 | 22.836 | 17.745 | 24.826 | 13.682 | 14.883 |
| 1 | 1.4545 | 15.594 | 18.251 | 13.092 | 25.074 | 22.498 |
| 1 | 1.4555 | 23.620 | 26.961 | 28.024 | 16.116 | 12.488 |
| 1 | 1.4565 | 14.399 | 17.635 | 14.626 | 15.406 | 16.044 |
| 1 | 1.4575 | 6.834  | 15.836 | 12.854 | 16.576 | 19.960 |
| 1 | 1.4585 | 11.752 | 22.137 | 11.448 | 21.887 | 22.313 |
| 1 | 1.4595 | 16.670 | 17.055 | 16.119 | 24.218 | 21.089 |
| 1 | 1.4605 | 9.234  | 4.954  | 9.074  | 3.278  | 5.303  |
| 1 | 1.4615 | 9.459  | 8.739  | 8.906  | 4.092  | 6.862  |
| 1 | 1.4625 | 17.743 | 18.359 | 16.684 | 21.461 | 16.772 |
| 1 | 1.4635 | 14.950 | 16.074 | 15.092 | 12.141 | 16.280 |
| 1 | 1.4645 | 24.311 | 19.567 | 22.863 | 15.728 | 16.267 |
| 1 | 1.4655 | 15.688 | 17.300 | 17.273 | 14.596 | 17.551 |
| 1 | 1.4665 | 8.464  | 15.681 | 13.206 | 9.220  | 6.259  |
| 1 | 1.4675 | 10.570 | 8.664  | 7.938  | 9.902  | 16.173 |
| 1 | 1.4685 | 12.974 | 15.841 | 12.919 | 4.018  | 7.008  |
| 1 | 1.4695 | 12.175 | 6.603  | 4.651  | 3.516  | 7.020  |
| 1 | 1.4705 | 14.444 | 7.807  | 9.542  | 18.364 | 14.076 |
| 1 | 1.4715 | 17.662 | 12.105 | 10.298 | 9.959  | 10.301 |
| 1 | 1.4725 | 20.640 | 16.966 | 15.707 | 10.436 | 13.725 |
| 1 | 1.4735 | 14.269 | 10.144 | 13.037 | 15.980 | 29.205 |
| 1 | 1.4745 | 24.493 | 19.101 | 14.475 | 20.943 | 24.529 |
| 1 | 1.4755 | 18.246 | 17.451 | 11.976 | 24.397 | 16.077 |
| 1 | 1.4765 | 17.604 | 19.341 | 15.181 | 19.898 | 20.026 |
| 1 | 1.4775 | 12.224 | 15.512 | 12.599 | 21.169 | 19.727 |
| 1 | 1.4785 | 9.187  | 7.007  | 3.754  | 16.255 | 9.182  |
| 1 | 1.4795 | 11.947 | 14.204 | 11.151 | 20.506 | 9.258  |
| 1 | 1.4805 | 19.202 | 18.905 | 16.084 | 23.338 | 23.919 |
| 1 | 1.4815 | 6.944  | 10.941 | 6.590  | 17.315 | 12.413 |
| 1 | 1.4825 | 6.888  | 11.202 | 6.691  | 17.412 | 12.293 |
| 1 | 1.4835 | 7.540  | 13.108 | 8.461  | 16.368 | 28.071 |
| 1 | 1.4845 | 20.379 | 23.714 | 18.659 | 11.569 | 22.404 |
| 1 | 1.4855 | 7.664  | 12.486 | 7.720  | 15.994 | 10.253 |
| 1 | 1.4865 | 23.753 | 15.937 | 20.126 | 29.450 | 19.493 |
| 1 | 1.4875 | 16.076 | 17.241 | 19.664 | 16.246 | 18.581 |
| 1 | 1.4885 | 7.109  | 17.267 | 14.815 | 18.938 | 10.211 |
| 1 | 1.4895 | 13.177 | 21.926 | 15.093 | 23.334 | 5.561  |
| 1 | 1.4905 | 15.305 | 16.797 | 13.906 | 22.482 | 13.448 |
| 1 | 1.4915 | 13.579 | 18.183 | 9.137  | 17.480 | 19.352 |
| 1 | 1.4925 | 16.625 | 15.101 | 11.696 | 23.604 | 12.388 |
| 1 | 1.4935 | 16.119 | 15.108 | 11.728 | 23.733 | 12.708 |
| 1 | 1.4945 | 10.307 | 13.088 | 12.404 | 18.290 | 24.259 |
| 1 | 1.4955 | 15.420 | 20.081 | 15.278 | 22.177 | 23.222 |
| 1 | 1.4965 | 15.010 | 18.322 | 20.233 | 13.563 | 20.290 |

|   |        |        |        |        |        |        |
|---|--------|--------|--------|--------|--------|--------|
| 1 | 1.4975 | 24.512 | 22.165 | 19.026 | 23.599 | 17.842 |
| 1 | 1.4985 | 10.774 | 25.028 | 14.801 | 28.141 | 19.633 |
| 1 | 1.4995 | 21.004 | 20.709 | 13.036 | 18.847 | 15.065 |
| 1 | 1.5005 | 26.655 | 30.281 | 30.291 | 16.501 | 20.753 |
| 1 | 1.5015 | 22.569 | 22.296 | 18.962 | 14.377 | 25.465 |
| 1 | 1.5025 | 8.322  | 7.537  | 5.865  | 8.665  | 13.842 |
| 1 | 1.5035 | 15.620 | 10.242 | 8.121  | 10.269 | 10.303 |
| 1 | 1.5045 | 3.533  | 6.909  | 5.617  | 14.275 | 16.389 |
| 1 | 1.5055 | 14.593 | 10.529 | 10.955 | 19.051 | 20.529 |
| 1 | 1.5065 | 9.473  | 7.700  | 11.023 | 7.516  | 15.487 |
| 1 | 1.5075 | 16.031 | 17.182 | 18.621 | 14.204 | 12.187 |
| 1 | 1.5085 | 15.220 | 19.178 | 20.230 | 20.783 | 7.807  |
| 1 | 1.5095 | 11.433 | 16.062 | 11.422 | 15.738 | 8.303  |
| 1 | 1.5105 | 14.935 | 12.038 | 10.588 | 17.606 | 9.559  |
| 1 | 1.5115 | 13.952 | 8.193  | 12.262 | 19.336 | 13.048 |
| 1 | 1.5125 | 18.961 | 10.550 | 18.066 | 28.217 | 16.065 |
| 1 | 1.5135 | 16.143 | 9.283  | 15.595 | 17.998 | 19.101 |
| 1 | 1.5145 | 19.240 | 17.425 | 13.625 | 19.267 | 20.081 |
| 1 | 1.5155 | 17.970 | 9.676  | 10.430 | 15.396 | 10.772 |
| 1 | 1.5165 | 21.797 | 14.272 | 16.948 | 17.472 | 14.614 |
| 1 | 1.5175 | 14.327 | 20.745 | 16.857 | 14.819 | 15.740 |
| 1 | 1.5185 | 10.961 | 12.835 | 12.294 | 15.923 | 14.395 |
| 1 | 1.5195 | 12.025 | 13.313 | 13.182 | 22.690 | 14.895 |
| 1 | 1.5205 | 8.674  | 5.943  | 9.492  | 4.146  | 7.007  |
| 1 | 1.5215 | 9.880  | 10.246 | 13.881 | 7.205  | 12.949 |
| 1 | 1.5225 | 14.122 | 22.094 | 16.846 | 23.715 | 12.756 |
| 1 | 1.5235 | 18.994 | 25.647 | 17.386 | 19.109 | 16.547 |
| 1 | 1.5245 | 8.992  | 11.141 | 12.226 | 17.642 | 20.538 |
| 1 | 1.5255 | 22.400 | 16.309 | 18.150 | 21.411 | 21.557 |
| 1 | 1.5265 | 23.000 | 13.709 | 20.811 | 24.396 | 14.567 |
| 1 | 1.5275 | 22.970 | 10.423 | 18.242 | 15.913 | 17.856 |
| 1 | 1.5285 | 8.000  | 4.286  | 9.644  | 7.910  | 10.158 |
| 1 | 1.5295 | 9.622  | 11.018 | 10.922 | 15.299 | 17.262 |
| 1 | 1.5305 | 23.480 | 27.325 | 26.958 | 16.913 | 18.405 |
| 1 | 1.5315 | 18.413 | 21.769 | 21.891 | 15.517 | 17.512 |
| 1 | 1.5325 | 18.837 | 25.669 | 24.766 | 23.706 | 16.155 |
| 1 | 1.5335 | 28.006 | 30.953 | 35.077 | 14.792 | 21.180 |
| 1 | 1.5345 | 25.115 | 24.017 | 30.711 | 15.571 | 9.966  |
| 1 | 1.5355 | 16.009 | 17.693 | 15.379 | 12.861 | 7.714  |
| 1 | 1.5365 | 15.949 | 13.677 | 19.289 | 11.495 | 11.738 |
| 1 | 1.5375 | 12.779 | 16.953 | 17.661 | 31.036 | 28.655 |
| 1 | 1.5385 | 16.836 | 21.906 | 20.288 | 27.699 | 21.285 |
| 1 | 1.5395 | 17.201 | 15.117 | 17.233 | 10.286 | 18.587 |
| 1 | 1.5405 | 21.336 | 16.633 | 20.516 | 13.006 | 14.767 |
| 1 | 1.5415 | 12.367 | 11.877 | 14.607 | 15.000 | 11.573 |
| 1 | 1.5425 | 10.602 | 13.419 | 15.278 | 20.802 | 17.282 |
| 1 | 1.5435 | 9.307  | 8.230  | 8.520  | 15.939 | 16.349 |
| 1 | 1.5445 | 9.224  | 9.461  | 8.327  | 6.761  | 12.452 |
| 1 | 1.5455 | 15.969 | 21.245 | 16.491 | 19.011 | 5.087  |
| 1 | 1.5465 | 15.903 | 22.041 | 19.427 | 11.471 | 6.638  |

|   |        |        |        |        |        |        |
|---|--------|--------|--------|--------|--------|--------|
| 1 | 1.5475 | 7.137  | 9.734  | 9.892  | 14.617 | 15.918 |
| 1 | 1.5485 | 8.622  | 9.086  | 10.066 | 12.562 | 16.052 |
| 1 | 1.5495 | 0.000  | 0.000  | 0.000  | 0.000  | 0.000  |
| 2 | 0.0006 | 0.000  | 0.000  | 0.000  | 0.000  | 0.000  |
| 2 | 0.0016 | 0.000  | 0.000  | 0.000  | 0.000  | 0.000  |
| 2 | 0.0026 | 5.672  | 1.856  | 2.068  | 14.728 | 17.130 |
| 2 | 0.0036 | 3.768  | 3.313  | 6.221  | 11.694 | 9.675  |
| 2 | 0.0046 | 8.197  | 4.948  | 6.461  | 17.160 | 25.277 |
| 2 | 0.0056 | 6.664  | 4.581  | 6.789  | 16.204 | 15.164 |
| 2 | 0.0066 | 7.859  | 7.753  | 14.414 | 21.221 | 13.881 |
| 2 | 0.0076 | 11.132 | 8.478  | 18.365 | 20.767 | 14.965 |
| 2 | 0.0086 | 8.544  | 7.457  | 9.287  | 28.552 | 13.509 |
| 2 | 0.0096 | 8.020  | 8.607  | 14.504 | 29.111 | 16.074 |
| 2 | 0.0106 | 9.777  | 12.672 | 16.361 | 25.578 | 35.049 |
| 2 | 0.0116 | 19.874 | 16.850 | 24.164 | 26.475 | 32.241 |
| 2 | 0.0126 | 19.163 | 12.137 | 23.140 | 17.297 | 16.854 |
| 2 | 0.0136 | 9.883  | 15.260 | 16.354 | 22.487 | 16.171 |
| 2 | 0.0146 | 15.298 | 18.149 | 22.587 | 16.472 | 23.533 |
| 2 | 0.0156 | 22.825 | 16.034 | 22.535 | 25.283 | 22.401 |
| 2 | 0.0166 | 17.827 | 15.414 | 15.706 | 17.603 | 17.050 |
| 2 | 0.0176 | 22.977 | 15.421 | 22.939 | 14.435 | 17.017 |
| 2 | 0.0186 | 13.074 | 12.912 | 17.398 | 11.180 | 10.925 |
| 2 | 0.0196 | 18.352 | 16.760 | 21.791 | 11.316 | 19.364 |
| 2 | 0.0206 | 17.943 | 16.430 | 21.369 | 11.530 | 19.617 |
| 2 | 0.0216 | 17.428 | 21.923 | 20.660 | 14.183 | 9.416  |
| 2 | 0.0226 | 17.797 | 20.335 | 18.424 | 7.872  | 5.766  |
| 2 | 0.0236 | 14.963 | 15.466 | 16.673 | 13.633 | 4.724  |
| 2 | 0.0246 | 27.781 | 23.350 | 28.139 | 14.975 | 13.045 |
| 2 | 0.0256 | 15.742 | 17.539 | 15.181 | 8.703  | 8.139  |
| 2 | 0.0266 | 16.889 | 14.482 | 14.382 | 9.036  | 7.408  |
| 2 | 0.0276 | 10.939 | 10.964 | 14.622 | 6.049  | 7.442  |
| 2 | 0.0286 | 12.547 | 10.288 | 14.350 | 4.576  | 8.085  |
| 2 | 0.0296 | 24.701 | 21.291 | 27.893 | 7.048  | 14.146 |
| 2 | 0.0306 | 16.077 | 17.633 | 17.714 | 12.651 | 13.881 |
| 2 | 0.0316 | 29.578 | 22.110 | 25.197 | 19.476 | 20.789 |
| 2 | 0.0326 | 15.288 | 21.607 | 14.272 | 17.976 | 14.935 |
| 2 | 0.0336 | 15.432 | 17.806 | 18.237 | 14.781 | 10.527 |
| 2 | 0.0346 | 14.294 | 19.255 | 19.544 | 21.620 | 9.585  |
| 2 | 0.0356 | 20.627 | 24.797 | 22.659 | 12.551 | 8.831  |
| 2 | 0.0366 | 15.588 | 20.339 | 25.329 | 16.627 | 15.537 |
| 2 | 0.0376 | 14.414 | 14.936 | 18.681 | 18.778 | 17.197 |
| 2 | 0.0386 | 28.517 | 23.466 | 28.445 | 18.262 | 20.441 |
| 2 | 0.0396 | 25.903 | 24.662 | 23.238 | 20.943 | 15.954 |
| 2 | 0.0406 | 14.477 | 15.319 | 21.767 | 22.957 | 13.817 |
| 2 | 0.0416 | 23.986 | 26.302 | 30.994 | 21.540 | 18.594 |
| 2 | 0.0426 | 22.467 | 14.967 | 25.660 | 18.740 | 19.433 |
| 2 | 0.0436 | 21.470 | 36.686 | 36.547 | 33.662 | 21.050 |
| 2 | 0.0446 | 15.734 | 15.243 | 23.861 | 21.544 | 21.710 |
| 2 | 0.0456 | 17.414 | 19.964 | 21.732 | 25.726 | 24.057 |
| 2 | 0.0466 | 15.379 | 19.387 | 18.881 | 19.960 | 32.248 |

|   |        |        |        |        |        |        |
|---|--------|--------|--------|--------|--------|--------|
| 2 | 0.0476 | 15.850 | 17.332 | 20.288 | 16.165 | 26.260 |
| 2 | 0.0486 | 23.004 | 21.663 | 24.302 | 9.305  | 24.330 |
| 2 | 0.0496 | 9.465  | 9.116  | 9.932  | 16.012 | 17.575 |
| 2 | 0.0506 | 21.361 | 21.670 | 32.394 | 11.434 | 19.577 |
| 2 | 0.0516 | 15.164 | 16.837 | 25.018 | 14.641 | 20.895 |
| 2 | 0.0526 | 14.378 | 11.913 | 13.362 | 21.261 | 18.704 |
| 2 | 0.0536 | 18.875 | 22.835 | 30.294 | 18.756 | 17.209 |
| 2 | 0.0546 | 12.188 | 15.211 | 18.509 | 23.613 | 28.016 |
| 2 | 0.0556 | 13.408 | 21.487 | 17.048 | 20.419 | 14.057 |
| 2 | 0.0566 | 10.015 | 8.954  | 9.994  | 16.049 | 7.384  |
| 2 | 0.0576 | 12.771 | 13.073 | 14.789 | 18.652 | 23.232 |
| 2 | 0.0586 | 11.326 | 15.721 | 18.467 | 27.166 | 19.621 |
| 2 | 0.0596 | 24.300 | 32.829 | 32.068 | 26.969 | 27.687 |
| 2 | 0.0606 | 11.656 | 17.665 | 13.872 | 23.935 | 35.104 |
| 2 | 0.0616 | 14.664 | 19.538 | 22.500 | 13.453 | 11.793 |
| 2 | 0.0626 | 14.388 | 19.989 | 16.900 | 19.496 | 12.073 |
| 2 | 0.0636 | 5.440  | 6.235  | 7.512  | 15.942 | 14.915 |
| 2 | 0.0646 | 8.253  | 3.671  | 5.994  | 12.392 | 22.045 |
| 2 | 0.0656 | 16.794 | 20.612 | 19.241 | 20.898 | 12.088 |
| 2 | 0.0666 | 16.553 | 25.438 | 19.929 | 18.487 | 13.347 |
| 2 | 0.0676 | 6.468  | 7.746  | 10.056 | 11.334 | 21.492 |
| 2 | 0.0686 | 10.279 | 13.466 | 13.520 | 7.472  | 7.280  |
| 2 | 0.0696 | 14.012 | 17.468 | 18.754 | 9.606  | 20.815 |
| 2 | 0.0706 | 21.335 | 29.563 | 29.746 | 16.981 | 14.527 |
| 2 | 0.0716 | 13.271 | 17.484 | 21.427 | 15.922 | 10.701 |
| 2 | 0.0726 | 17.423 | 16.161 | 20.301 | 10.506 | 20.313 |
| 2 | 0.0736 | 23.962 | 18.729 | 21.255 | 19.011 | 28.076 |
| 2 | 0.0746 | 14.777 | 18.648 | 15.117 | 24.638 | 19.838 |
| 2 | 0.0756 | 14.407 | 16.259 | 15.076 | 9.362  | 15.707 |
| 2 | 0.0766 | 12.132 | 16.744 | 14.622 | 14.588 | 26.100 |
| 2 | 0.0776 | 9.909  | 9.076  | 13.951 | 13.298 | 16.128 |
| 2 | 0.0786 | 12.836 | 12.608 | 16.624 | 13.231 | 22.525 |
| 2 | 0.0796 | 9.290  | 9.883  | 12.749 | 5.905  | 19.346 |
| 2 | 0.0806 | 14.700 | 19.014 | 21.465 | 11.131 | 18.348 |
| 2 | 0.0816 | 12.094 | 11.214 | 17.283 | 6.248  | 12.330 |
| 2 | 0.0826 | 7.282  | 4.918  | 7.980  | 7.211  | 10.882 |
| 2 | 0.0836 | 17.661 | 20.594 | 31.440 | 7.621  | 20.235 |
| 2 | 0.0846 | 16.257 | 25.990 | 32.126 | 14.152 | 19.122 |
| 2 | 0.0856 | 26.795 | 35.047 | 31.756 | 19.291 | 25.991 |
| 2 | 0.0866 | 15.463 | 16.429 | 19.325 | 13.553 | 26.674 |
| 2 | 0.0876 | 4.667  | 9.740  | 9.753  | 13.310 | 26.148 |
| 2 | 0.0886 | 9.231  | 15.397 | 15.833 | 12.090 | 19.027 |
| 2 | 0.0896 | 9.200  | 13.560 | 14.566 | 13.398 | 12.733 |
| 2 | 0.0906 | 11.391 | 15.281 | 14.691 | 12.561 | 18.525 |
| 2 | 0.0916 | 10.492 | 7.459  | 13.213 | 18.948 | 30.547 |
| 2 | 0.0926 | 13.777 | 16.537 | 20.003 | 11.174 | 16.220 |
| 2 | 0.0936 | 13.077 | 14.616 | 16.442 | 5.165  | 4.844  |
| 2 | 0.0946 | 20.702 | 25.646 | 25.285 | 14.751 | 19.361 |
| 2 | 0.0956 | 19.390 | 24.403 | 26.624 | 13.208 | 21.373 |
| 2 | 0.0966 | 13.256 | 13.600 | 23.549 | 16.661 | 18.199 |

|   |        |        |        |        |        |        |
|---|--------|--------|--------|--------|--------|--------|
| 2 | 0.0976 | 20.471 | 6.705  | 17.080 | 13.057 | 23.137 |
| 2 | 0.0986 | 12.736 | 18.698 | 24.718 | 25.629 | 27.102 |
| 2 | 0.0996 | 13.362 | 19.387 | 25.943 | 12.165 | 16.143 |
| 2 | 0.1006 | 14.062 | 22.895 | 30.865 | 22.568 | 21.476 |
| 2 | 0.1016 | 10.404 | 23.834 | 17.046 | 20.696 | 13.195 |
| 2 | 0.1026 | 11.389 | 16.921 | 10.021 | 18.618 | 12.443 |
| 2 | 0.1036 | 8.836  | 11.421 | 10.754 | 9.350  | 18.027 |
| 2 | 0.1046 | 11.177 | 14.220 | 13.430 | 22.167 | 14.250 |
| 2 | 0.1056 | 7.129  | 13.051 | 12.205 | 25.849 | 24.589 |
| 2 | 0.1066 | 8.971  | 9.533  | 9.721  | 18.788 | 28.544 |
| 2 | 0.1076 | 17.802 | 15.402 | 19.634 | 9.423  | 13.437 |
| 2 | 0.1086 | 17.493 | 13.989 | 18.712 | 13.317 | 14.545 |
| 2 | 0.1096 | 12.660 | 11.918 | 14.062 | 16.073 | 18.443 |
| 2 | 0.1106 | 13.695 | 13.502 | 14.594 | 14.258 | 14.753 |
| 2 | 0.1116 | 8.689  | 11.750 | 7.816  | 14.377 | 14.488 |
| 2 | 0.1126 | 4.933  | 8.125  | 4.112  | 23.327 | 16.071 |
| 2 | 0.1136 | 6.372  | 8.604  | 10.204 | 9.934  | 12.011 |
| 2 | 0.1146 | 9.047  | 7.274  | 10.044 | 9.448  | 12.593 |
| 2 | 0.1156 | 8.578  | 7.128  | 10.160 | 15.792 | 17.161 |
| 2 | 0.1166 | 3.617  | 6.394  | 4.840  | 7.603  | 6.649  |
| 2 | 0.1176 | 10.900 | 9.966  | 10.657 | 12.173 | 13.256 |
| 2 | 0.1186 | 13.480 | 10.328 | 17.477 | 11.496 | 12.519 |
| 2 | 0.1196 | 4.274  | 5.193  | 7.806  | 5.535  | 7.107  |
| 2 | 0.1206 | 5.122  | 14.359 | 11.475 | 23.629 | 23.911 |
| 2 | 0.1216 | 9.353  | 11.888 | 11.573 | 11.916 | 23.512 |
| 2 | 0.1226 | 10.544 | 14.711 | 12.679 | 13.718 | 18.033 |
| 2 | 0.1236 | 13.388 | 16.069 | 10.740 | 20.187 | 14.681 |
| 2 | 0.1246 | 11.196 | 16.960 | 12.888 | 23.164 | 26.537 |
| 2 | 0.1256 | 12.146 | 14.625 | 14.552 | 14.253 | 14.877 |
| 2 | 0.1266 | 22.709 | 21.951 | 15.641 | 19.523 | 20.093 |
| 2 | 0.1276 | 21.739 | 26.270 | 23.697 | 23.418 | 13.533 |
| 2 | 0.1286 | 9.803  | 10.332 | 16.720 | 11.563 | 11.479 |
| 2 | 0.1296 | 10.307 | 9.976  | 15.874 | 9.483  | 8.089  |
| 2 | 0.1306 | 16.061 | 23.080 | 21.302 | 16.756 | 13.109 |
| 2 | 0.1316 | 14.254 | 19.393 | 14.057 | 16.708 | 10.801 |
| 2 | 0.1326 | 8.744  | 8.749  | 9.681  | 9.857  | 11.280 |
| 2 | 0.1336 | 11.902 | 17.842 | 14.554 | 20.849 | 9.808  |
| 2 | 0.1346 | 16.273 | 17.706 | 21.689 | 18.605 | 13.900 |
| 2 | 0.1356 | 16.023 | 22.215 | 19.717 | 23.780 | 7.020  |
| 2 | 0.1366 | 17.540 | 18.719 | 23.348 | 20.916 | 20.465 |
| 2 | 0.1376 | 23.407 | 20.006 | 25.578 | 10.822 | 18.433 |
| 2 | 0.1386 | 20.522 | 23.571 | 27.760 | 16.132 | 21.120 |
| 2 | 0.1396 | 21.407 | 24.139 | 26.676 | 8.299  | 18.050 |
| 2 | 0.1406 | 19.191 | 20.411 | 26.976 | 4.394  | 12.598 |
| 2 | 0.1416 | 6.107  | 10.367 | 10.428 | 6.381  | 12.550 |
| 2 | 0.1426 | 3.408  | 19.122 | 12.904 | 14.473 | 8.118  |
| 2 | 0.1436 | 3.810  | 11.270 | 13.120 | 10.974 | 15.629 |
| 2 | 0.1446 | 18.543 | 15.510 | 19.932 | 5.759  | 14.863 |
| 2 | 0.1456 | 18.139 | 26.902 | 23.538 | 25.420 | 23.611 |
| 2 | 0.1466 | 18.322 | 26.861 | 23.649 | 25.762 | 23.880 |



|   |        |        |        |        |        |        |
|---|--------|--------|--------|--------|--------|--------|
| 2 | 0.1476 | 25.985 | 22.245 | 21.783 | 13.451 | 16.586 |
| 2 | 0.1486 | 23.769 | 22.247 | 24.098 | 20.862 | 23.998 |
| 2 | 0.1496 | 22.664 | 30.560 | 35.862 | 13.512 | 14.642 |
| 2 | 0.1506 | 22.115 | 29.974 | 28.338 | 15.110 | 10.532 |
| 2 | 0.1516 | 24.839 | 35.758 | 33.608 | 14.518 | 10.155 |
| 2 | 0.1526 | 11.525 | 17.704 | 14.513 | 15.340 | 15.928 |
| 2 | 0.1536 | 13.568 | 17.539 | 19.819 | 15.581 | 20.167 |
| 2 | 0.1546 | 18.916 | 22.426 | 24.966 | 11.938 | 9.829  |
| 2 | 0.1556 | 8.946  | 14.840 | 13.005 | 17.244 | 11.463 |
| 2 | 0.1566 | 16.045 | 18.903 | 17.207 | 24.124 | 14.721 |
| 2 | 0.1576 | 16.001 | 18.906 | 17.096 | 24.282 | 14.636 |
| 2 | 0.1586 | 20.681 | 21.757 | 18.334 | 21.081 | 11.673 |
| 2 | 0.1596 | 12.230 | 16.905 | 10.704 | 21.369 | 8.560  |
| 2 | 0.1606 | 18.444 | 20.415 | 12.766 | 13.237 | 12.066 |
| 2 | 0.1616 | 20.022 | 15.040 | 24.445 | 7.451  | 10.864 |
| 2 | 0.1626 | 15.984 | 20.040 | 21.334 | 9.666  | 9.141  |
| 2 | 0.1636 | 15.886 | 18.196 | 21.475 | 16.014 | 10.562 |
| 2 | 0.1646 | 6.050  | 6.762  | 11.025 | 11.702 | 17.231 |
| 2 | 0.1656 | 6.823  | 10.010 | 15.224 | 8.174  | 16.223 |
| 2 | 0.1666 | 6.811  | 10.006 | 11.549 | 19.377 | 11.948 |
| 2 | 0.1676 | 8.470  | 8.592  | 12.450 | 9.332  | 15.243 |
| 2 | 0.1686 | 9.071  | 9.410  | 10.276 | 11.506 | 7.935  |
| 2 | 0.1696 | 20.711 | 20.122 | 21.501 | 16.373 | 10.103 |
| 2 | 0.1706 | 11.389 | 5.918  | 6.996  | 12.771 | 23.032 |
| 2 | 0.1716 | 12.378 | 8.781  | 9.094  | 12.909 | 14.289 |
| 2 | 0.1726 | 13.338 | 11.505 | 12.449 | 16.214 | 12.764 |
| 2 | 0.1736 | 10.834 | 17.385 | 19.400 | 12.747 | 26.098 |
| 2 | 0.1746 | 19.234 | 20.860 | 22.298 | 16.169 | 15.457 |
| 2 | 0.1756 | 20.417 | 20.564 | 23.970 | 16.177 | 11.470 |
| 2 | 0.1766 | 14.146 | 22.569 | 19.191 | 12.511 | 8.714  |
| 2 | 0.1776 | 25.525 | 32.722 | 30.154 | 26.080 | 14.748 |
| 2 | 0.1786 | 15.215 | 23.451 | 22.227 | 21.281 | 23.218 |
| 2 | 0.1796 | 15.002 | 28.626 | 25.817 | 24.736 | 13.530 |
| 2 | 0.1806 | 20.711 | 21.310 | 24.330 | 28.015 | 18.385 |
| 2 | 0.1816 | 25.289 | 19.719 | 27.735 | 16.767 | 10.696 |
| 2 | 0.1826 | 15.116 | 15.600 | 17.782 | 10.339 | 3.588  |
| 2 | 0.1836 | 17.510 | 15.414 | 17.115 | 6.346  | 11.662 |
| 2 | 0.1846 | 8.355  | 4.849  | 5.729  | 16.189 | 9.162  |
| 2 | 0.1856 | 12.629 | 9.628  | 11.900 | 14.278 | 10.915 |
| 2 | 0.1866 | 15.689 | 17.229 | 20.974 | 12.539 | 24.265 |
| 2 | 0.1876 | 13.650 | 21.148 | 20.650 | 12.343 | 9.251  |
| 2 | 0.1886 | 7.636  | 16.537 | 16.522 | 9.055  | 9.613  |
| 2 | 0.1896 | 12.177 | 25.297 | 18.503 | 15.734 | 13.576 |
| 2 | 0.1906 | 12.141 | 18.573 | 13.864 | 13.617 | 8.291  |
| 2 | 0.1916 | 8.123  | 23.545 | 20.326 | 21.064 | 19.939 |
| 2 | 0.1926 | 11.981 | 20.996 | 18.628 | 20.267 | 11.760 |
| 2 | 0.1936 | 20.962 | 14.859 | 21.843 | 7.012  | 7.102  |
| 2 | 0.1946 | 12.424 | 13.367 | 15.440 | 9.802  | 5.280  |
| 2 | 0.1956 | 13.578 | 19.059 | 21.969 | 13.198 | 21.021 |
| 2 | 0.1966 | 14.549 | 21.167 | 23.861 | 14.957 | 20.250 |

|   |        |        |        |        |        |        |
|---|--------|--------|--------|--------|--------|--------|
| 2 | 0.1976 | 12.650 | 23.196 | 18.555 | 24.753 | 17.812 |
| 2 | 0.1986 | 8.385  | 12.481 | 17.917 | 14.558 | 15.627 |
| 2 | 0.1996 | 8.949  | 11.124 | 8.034  | 12.879 | 7.223  |
| 2 | 0.2006 | 13.808 | 19.300 | 19.818 | 18.087 | 22.289 |
| 2 | 0.2016 | 9.329  | 13.321 | 11.580 | 18.949 | 20.678 |
| 2 | 0.2026 | 6.167  | 7.085  | 9.730  | 11.211 | 16.906 |
| 2 | 0.2036 | 11.932 | 11.012 | 9.350  | 13.342 | 16.839 |
| 2 | 0.2046 | 17.163 | 7.484  | 9.061  | 12.065 | 13.439 |
| 2 | 0.2056 | 6.056  | 9.002  | 11.556 | 14.589 | 10.099 |
| 2 | 0.2066 | 16.541 | 18.407 | 19.964 | 25.548 | 10.416 |
| 2 | 0.2076 | 7.227  | 8.114  | 7.799  | 16.106 | 6.209  |
| 2 | 0.2086 | 9.682  | 4.740  | 9.748  | 9.615  | 7.412  |
| 2 | 0.2096 | 12.670 | 8.452  | 14.523 | 6.700  | 6.851  |
| 2 | 0.2106 | 11.562 | 8.132  | 8.847  | 18.465 | 16.795 |
| 2 | 0.2116 | 7.453  | 8.279  | 8.407  | 19.356 | 11.569 |
| 2 | 0.2126 | 9.997  | 11.522 | 9.745  | 13.830 | 5.634  |
| 2 | 0.2136 | 23.963 | 12.819 | 18.013 | 25.135 | 7.481  |
| 2 | 0.2146 | 7.369  | 9.695  | 9.995  | 21.803 | 10.050 |
| 2 | 0.2156 | 10.508 | 10.003 | 11.206 | 23.121 | 10.347 |
| 2 | 0.2166 | 10.557 | 5.816  | 5.809  | 14.627 | 13.699 |
| 2 | 0.2176 | 13.647 | 13.764 | 8.495  | 16.800 | 15.572 |
| 2 | 0.2186 | 21.483 | 22.383 | 16.121 | 17.844 | 13.124 |
| 2 | 0.2196 | 10.305 | 7.378  | 10.321 | 8.082  | 10.630 |
| 2 | 0.2206 | 14.686 | 17.224 | 17.611 | 13.712 | 14.688 |
| 2 | 0.2216 | 12.261 | 16.292 | 13.252 | 15.324 | 11.098 |
| 2 | 0.2226 | 12.598 | 8.410  | 8.634  | 27.554 | 25.051 |
| 2 | 0.2236 | 10.561 | 20.068 | 11.833 | 32.387 | 12.544 |
| 2 | 0.2246 | 10.947 | 14.432 | 18.810 | 12.549 | 6.280  |
| 2 | 0.2256 | 12.963 | 15.891 | 13.391 | 40.479 | 25.679 |
| 2 | 0.2266 | 13.440 | 16.781 | 14.893 | 39.292 | 17.985 |
| 2 | 0.2276 | 14.944 | 22.873 | 18.388 | 45.802 | 8.296  |
| 2 | 0.2286 | 6.268  | 15.082 | 15.426 | 19.863 | 7.918  |
| 2 | 0.2296 | 14.131 | 16.031 | 15.413 | 13.572 | 6.320  |
| 2 | 0.2306 | 14.221 | 19.454 | 16.061 | 33.390 | 10.580 |
| 2 | 0.2316 | 24.223 | 33.185 | 28.119 | 32.379 | 9.685  |
| 2 | 0.2326 | 16.711 | 21.174 | 16.110 | 27.458 | 5.194  |
| 2 | 0.2336 | 14.051 | 19.277 | 16.757 | 11.528 | 4.510  |
| 2 | 0.2346 | 14.078 | 19.365 | 16.865 | 11.577 | 4.509  |
| 2 | 0.2356 | 13.578 | 15.360 | 13.177 | 9.520  | 6.756  |
| 2 | 0.2366 | 15.766 | 13.547 | 17.268 | 7.562  | 10.432 |
| 2 | 0.2376 | 13.701 | 15.456 | 13.705 | 7.963  | 12.420 |
| 2 | 0.2386 | 6.367  | 13.095 | 9.084  | 14.374 | 8.227  |
| 2 | 0.2396 | 6.380  | 13.080 | 9.057  | 14.449 | 8.235  |
| 2 | 0.2406 | 6.395  | 13.063 | 9.033  | 14.521 | 8.242  |
| 2 | 0.2416 | 11.950 | 21.595 | 17.165 | 21.708 | 5.022  |
| 2 | 0.2426 | 16.141 | 26.851 | 14.114 | 28.814 | 13.944 |
| 2 | 0.2436 | 7.967  | 24.003 | 13.302 | 31.770 | 13.469 |
| 2 | 0.2446 | 9.368  | 17.892 | 11.713 | 17.626 | 12.088 |
| 2 | 0.2456 | 18.223 | 27.739 | 22.415 | 23.639 | 12.931 |
| 2 | 0.2466 | 7.512  | 21.229 | 13.616 | 34.974 | 15.172 |

|   |        |        |        |        |        |        |
|---|--------|--------|--------|--------|--------|--------|
| 2 | 0.2476 | 8.896  | 21.344 | 10.759 | 29.275 | 5.835  |
| 2 | 0.2486 | 8.876  | 21.308 | 10.733 | 29.157 | 5.827  |
| 2 | 0.2496 | 5.319  | 13.712 | 5.687  | 14.488 | 4.941  |
| 2 | 0.2506 | 5.823  | 10.754 | 10.630 | 16.982 | 5.717  |
| 2 | 0.2516 | 13.342 | 18.169 | 15.951 | 18.320 | 4.398  |
| 2 | 0.2526 | 12.074 | 15.860 | 17.060 | 12.060 | 4.390  |
| 2 | 0.2536 | 16.333 | 18.161 | 18.544 | 19.487 | 8.785  |
| 2 | 0.2546 | 17.618 | 20.591 | 18.970 | 23.993 | 13.524 |
| 2 | 0.2556 | 20.762 | 34.735 | 27.934 | 24.416 | 9.458  |
| 2 | 0.2566 | 20.349 | 25.054 | 23.307 | 8.775  | 4.092  |
| 2 | 0.2576 | 12.433 | 17.052 | 13.512 | 22.080 | 8.593  |
| 2 | 0.2586 | 16.771 | 22.049 | 17.142 | 27.109 | 5.740  |
| 2 | 0.2596 | 20.474 | 30.983 | 28.881 | 15.862 | 10.000 |
| 2 | 0.2606 | 22.298 | 33.864 | 35.095 | 18.452 | 15.118 |
| 2 | 0.2616 | 25.046 | 45.864 | 37.737 | 33.762 | 12.471 |
| 2 | 0.2626 | 11.379 | 12.979 | 13.843 | 19.980 | 6.736  |
| 2 | 0.2636 | 30.932 | 39.013 | 42.441 | 26.347 | 16.414 |
| 2 | 0.2646 | 16.722 | 21.833 | 17.588 | 23.121 | 7.033  |
| 2 | 0.2656 | 14.558 | 21.009 | 19.428 | 22.565 | 17.070 |
| 2 | 0.2666 | 14.524 | 20.959 | 19.338 | 22.548 | 17.146 |
| 2 | 0.2676 | 13.476 | 14.638 | 16.192 | 16.578 | 9.519  |
| 2 | 0.2686 | 9.991  | 11.537 | 8.421  | 14.183 | 7.028  |
| 2 | 0.2696 | 17.571 | 16.170 | 15.772 | 23.095 | 10.902 |
| 2 | 0.2706 | 20.475 | 18.881 | 20.404 | 12.915 | 11.237 |
| 2 | 0.2716 | 12.115 | 19.790 | 14.165 | 13.101 | 4.757  |
| 2 | 0.2726 | 15.698 | 26.754 | 17.327 | 24.260 | 10.012 |
| 2 | 0.2736 | 20.619 | 16.798 | 23.758 | 7.744  | 6.476  |
| 2 | 0.2746 | 16.888 | 11.156 | 20.289 | 4.247  | 6.937  |
| 2 | 0.2756 | 13.396 | 15.615 | 17.383 | 16.099 | 7.837  |
| 2 | 0.2766 | 19.944 | 15.917 | 22.464 | 12.572 | 7.408  |
| 2 | 0.2776 | 12.683 | 13.427 | 11.272 | 17.128 | 14.119 |
| 2 | 0.2786 | 16.095 | 34.084 | 22.233 | 26.274 | 5.799  |
| 2 | 0.2796 | 7.585  | 6.900  | 7.393  | 7.738  | 3.549  |
| 2 | 0.2806 | 25.195 | 13.057 | 16.470 | 20.225 | 8.645  |
| 2 | 0.2816 | 19.050 | 16.492 | 15.740 | 18.077 | 6.968  |
| 2 | 0.2826 | 13.600 | 14.727 | 19.386 | 9.187  | 8.590  |
| 2 | 0.2836 | 8.803  | 13.055 | 11.361 | 16.674 | 11.184 |
| 2 | 0.2846 | 7.921  | 12.448 | 11.796 | 12.592 | 5.647  |
| 2 | 0.2856 | 17.824 | 17.885 | 23.449 | 14.453 | 12.710 |
| 2 | 0.2866 | 28.840 | 28.831 | 30.244 | 11.034 | 15.884 |
| 2 | 0.2876 | 18.332 | 18.740 | 19.224 | 7.796  | 11.074 |
| 2 | 0.2886 | 19.047 | 16.401 | 20.238 | 8.754  | 13.690 |
| 2 | 0.2896 | 6.899  | 11.561 | 10.061 | 19.833 | 6.380  |
| 2 | 0.2906 | 8.863  | 13.059 | 12.156 | 17.279 | 7.509  |
| 2 | 0.2916 | 11.820 | 11.999 | 16.264 | 12.255 | 13.714 |
| 2 | 0.2926 | 27.470 | 24.605 | 28.139 | 12.050 | 14.519 |
| 2 | 0.2936 | 13.557 | 16.083 | 15.475 | 15.691 | 11.053 |
| 2 | 0.2946 | 18.352 | 23.019 | 23.231 | 8.818  | 13.864 |
| 2 | 0.2956 | 19.133 | 18.507 | 19.116 | 8.142  | 19.551 |
| 2 | 0.2966 | 18.954 | 12.655 | 12.682 | 5.596  | 10.099 |

|   |        |        |        |        |        |        |
|---|--------|--------|--------|--------|--------|--------|
| 2 | 0.2976 | 8.957  | 8.648  | 10.358 | 11.274 | 8.854  |
| 2 | 0.2986 | 12.760 | 20.973 | 11.494 | 19.810 | 12.114 |
| 2 | 0.2996 | 15.878 | 17.256 | 15.611 | 13.629 | 12.885 |
| 2 | 0.3006 | 21.816 | 14.981 | 24.368 | 15.863 | 8.877  |
| 2 | 0.3016 | 25.970 | 17.708 | 23.665 | 16.293 | 18.861 |
| 2 | 0.3026 | 17.217 | 17.529 | 23.145 | 16.198 | 12.240 |
| 2 | 0.3036 | 29.010 | 17.730 | 25.760 | 10.345 | 11.486 |
| 2 | 0.3046 | 9.853  | 10.950 | 8.217  | 12.262 | 12.566 |
| 2 | 0.3056 | 17.681 | 13.388 | 13.406 | 12.253 | 6.644  |
| 2 | 0.3066 | 12.153 | 7.535  | 18.388 | 11.101 | 13.160 |
| 2 | 0.3076 | 13.697 | 13.649 | 20.705 | 15.126 | 15.875 |
| 2 | 0.3086 | 19.171 | 19.741 | 23.011 | 9.447  | 5.583  |
| 2 | 0.3096 | 18.849 | 17.454 | 20.074 | 13.607 | 12.695 |
| 2 | 0.3106 | 15.356 | 14.416 | 17.224 | 14.505 | 13.177 |
| 2 | 0.3116 | 8.395  | 10.267 | 10.603 | 6.498  | 8.972  |
| 2 | 0.3126 | 11.391 | 10.803 | 15.185 | 6.987  | 6.742  |
| 2 | 0.3136 | 14.926 | 13.484 | 17.933 | 7.533  | 12.364 |
| 2 | 0.3146 | 13.285 | 6.629  | 11.053 | 5.376  | 10.946 |
| 2 | 0.3156 | 5.586  | 6.854  | 6.272  | 5.240  | 2.111  |
| 2 | 0.3166 | 11.641 | 8.445  | 11.056 | 7.561  | 7.009  |
| 2 | 0.3176 | 13.682 | 15.916 | 18.776 | 7.973  | 7.834  |
| 2 | 0.3186 | 16.568 | 14.866 | 18.744 | 7.328  | 7.162  |
| 2 | 0.3196 | 26.088 | 19.239 | 25.238 | 9.811  | 11.139 |
| 2 | 0.3206 | 9.523  | 10.022 | 12.915 | 9.955  | 12.973 |
| 2 | 0.3216 | 15.397 | 7.684  | 14.663 | 18.314 | 10.252 |
| 2 | 0.3226 | 15.547 | 8.917  | 15.735 | 13.509 | 7.000  |
| 2 | 0.3236 | 11.826 | 7.512  | 12.058 | 7.174  | 5.248  |
| 2 | 0.3246 | 12.797 | 6.058  | 10.203 | 10.671 | 8.706  |
| 2 | 0.3256 | 9.476  | 10.890 | 10.856 | 17.116 | 8.263  |
| 2 | 0.3266 | 3.066  | 5.903  | 4.542  | 10.559 | 4.917  |
| 2 | 0.3276 | 8.841  | 9.713  | 14.353 | 14.158 | 10.277 |
| 2 | 0.3286 | 10.705 | 13.470 | 15.752 | 7.513  | 9.474  |
| 2 | 0.3296 | 3.518  | 9.545  | 6.814  | 8.391  | 10.142 |
| 2 | 0.3306 | 5.642  | 4.391  | 4.050  | 8.554  | 5.497  |
| 2 | 0.3316 | 9.448  | 7.582  | 11.027 | 10.446 | 17.257 |
| 2 | 0.3326 | 6.920  | 9.464  | 8.037  | 13.462 | 11.694 |
| 2 | 0.3336 | 12.413 | 12.389 | 13.072 | 17.064 | 11.761 |
| 2 | 0.3346 | 11.124 | 13.351 | 13.784 | 6.843  | 8.902  |
| 2 | 0.3356 | 7.500  | 10.992 | 12.983 | 16.064 | 22.745 |
| 2 | 0.3366 | 10.311 | 11.868 | 11.134 | 10.008 | 21.299 |
| 2 | 0.3376 | 14.289 | 11.852 | 13.846 | 7.555  | 14.397 |
| 2 | 0.3386 | 9.085  | 6.853  | 12.584 | 8.339  | 12.208 |
| 2 | 0.3396 | 12.244 | 8.467  | 13.088 | 17.107 | 8.907  |
| 2 | 0.3406 | 3.760  | 4.290  | 1.987  | 7.797  | 4.114  |
| 2 | 0.3416 | 4.859  | 5.696  | 3.719  | 15.023 | 9.385  |
| 2 | 0.3426 | 6.252  | 1.264  | 4.668  | 4.984  | 5.673  |
| 2 | 0.3436 | 3.386  | 5.486  | 5.898  | 6.125  | 1.842  |
| 2 | 0.3446 | 4.013  | 4.035  | 4.136  | 3.307  | 4.919  |
| 2 | 0.3456 | 4.879  | 8.344  | 8.600  | 8.242  | 9.718  |
| 2 | 0.3466 | 9.652  | 15.687 | 8.504  | 7.054  | 9.450  |

|   |        |        |        |        |        |        |
|---|--------|--------|--------|--------|--------|--------|
| 2 | 0.3476 | 8.096  | 10.167 | 7.347  | 9.671  | 2.464  |
| 2 | 0.3486 | 9.546  | 11.794 | 8.216  | 16.646 | 19.237 |
| 2 | 0.3496 | 10.729 | 14.642 | 14.695 | 15.672 | 11.209 |
| 2 | 0.3506 | 16.581 | 13.530 | 13.365 | 21.857 | 12.868 |
| 2 | 0.3516 | 6.692  | 5.428  | 8.550  | 14.652 | 11.259 |
| 2 | 0.3526 | 4.063  | 4.035  | 5.284  | 7.042  | 14.886 |
| 2 | 0.3536 | 6.076  | 5.587  | 6.016  | 12.317 | 10.407 |
| 2 | 0.3546 | 7.889  | 7.106  | 5.113  | 17.067 | 7.297  |
| 2 | 0.3556 | 9.239  | 4.107  | 9.723  | 19.480 | 14.154 |
| 2 | 0.3566 | 10.376 | 6.906  | 9.909  | 12.447 | 12.064 |
| 2 | 0.3576 | 9.206  | 7.069  | 6.457  | 11.661 | 11.843 |
| 2 | 0.3586 | 13.213 | 6.931  | 11.927 | 10.783 | 10.218 |
| 2 | 0.3596 | 10.004 | 8.755  | 8.872  | 11.993 | 12.361 |
| 2 | 0.3606 | 7.854  | 5.150  | 7.100  | 8.037  | 11.191 |
| 2 | 0.3616 | 7.463  | 4.856  | 6.473  | 8.820  | 11.519 |
| 2 | 0.3626 | 6.816  | 3.903  | 5.569  | 8.020  | 15.509 |
| 2 | 0.3636 | 6.690  | 3.644  | 4.220  | 13.646 | 8.684  |
| 2 | 0.3646 | 1.916  | 0.566  | 1.316  | 7.284  | 2.607  |
| 2 | 0.3656 | 1.009  | 3.019  | 3.207  | 10.256 | 8.686  |
| 2 | 0.3666 | 9.784  | 7.311  | 14.339 | 10.328 | 14.963 |
| 2 | 0.3676 | 10.109 | 9.542  | 10.075 | 12.000 | 7.561  |
| 2 | 0.3686 | 12.852 | 8.702  | 12.855 | 8.835  | 6.265  |
| 2 | 0.3696 | 17.543 | 20.857 | 14.164 | 14.638 | 16.637 |
| 2 | 0.3706 | 11.106 | 13.943 | 9.309  | 5.324  | 7.418  |
| 2 | 0.3716 | 23.028 | 9.880  | 13.484 | 12.931 | 14.496 |
| 2 | 0.3726 | 13.576 | 9.423  | 9.207  | 17.996 | 20.401 |
| 2 | 0.3736 | 6.938  | 5.802  | 3.419  | 11.301 | 12.211 |
| 2 | 0.3746 | 3.626  | 4.617  | 3.109  | 8.200  | 7.552  |
| 2 | 0.3756 | 21.477 | 9.786  | 17.806 | 12.184 | 9.707  |
| 2 | 0.3766 | 8.613  | 9.544  | 9.184  | 15.979 | 11.639 |
| 2 | 0.3776 | 5.796  | 7.526  | 7.143  | 12.949 | 11.412 |
| 2 | 0.3786 | 6.285  | 9.771  | 2.765  | 5.818  | 11.901 |
| 2 | 0.3796 | 13.367 | 14.449 | 10.695 | 14.871 | 17.333 |
| 2 | 0.3806 | 15.680 | 17.726 | 14.553 | 11.900 | 15.855 |
| 2 | 0.3816 | 17.746 | 17.840 | 15.790 | 13.113 | 15.702 |
| 2 | 0.3826 | 12.113 | 14.211 | 10.461 | 7.033  | 9.242  |
| 2 | 0.3836 | 2.428  | 4.141  | 2.719  | 11.459 | 3.653  |
| 2 | 0.3846 | 5.059  | 5.855  | 7.643  | 9.239  | 12.217 |
| 2 | 0.3856 | 6.449  | 6.608  | 6.661  | 12.980 | 7.859  |
| 2 | 0.3866 | 12.437 | 9.092  | 14.633 | 13.124 | 7.614  |
| 2 | 0.3876 | 7.456  | 8.004  | 11.348 | 11.860 | 6.552  |
| 2 | 0.3886 | 8.577  | 8.765  | 11.596 | 10.921 | 8.904  |
| 2 | 0.3896 | 8.569  | 6.289  | 5.447  | 11.759 | 6.978  |
| 2 | 0.3906 | 4.923  | 8.998  | 5.581  | 9.572  | 9.962  |
| 2 | 0.3916 | 12.306 | 12.062 | 10.708 | 12.003 | 16.610 |
| 2 | 0.3926 | 4.574  | 6.150  | 7.445  | 16.426 | 16.298 |
| 2 | 0.3936 | 11.791 | 13.230 | 16.576 | 7.437  | 7.976  |
| 2 | 0.3946 | 13.602 | 13.121 | 17.559 | 8.489  | 11.408 |
| 2 | 0.3956 | 17.013 | 9.813  | 16.181 | 16.513 | 24.072 |
| 2 | 0.3966 | 23.556 | 16.219 | 16.806 | 7.299  | 30.480 |

|   |        |        |        |        |        |        |
|---|--------|--------|--------|--------|--------|--------|
| 2 | 0.3976 | 11.406 | 13.420 | 7.633  | 10.187 | 24.500 |
| 2 | 0.3986 | 13.562 | 20.879 | 18.361 | 14.732 | 11.971 |
| 2 | 0.3996 | 4.102  | 5.968  | 6.839  | 14.098 | 11.348 |
| 2 | 0.4006 | 5.936  | 12.377 | 8.623  | 9.586  | 11.908 |
| 2 | 0.4016 | 17.601 | 17.950 | 13.834 | 9.606  | 16.332 |
| 2 | 0.4026 | 15.308 | 13.212 | 13.200 | 5.903  | 10.443 |
| 2 | 0.4036 | 13.051 | 13.525 | 11.162 | 6.345  | 14.457 |
| 2 | 0.4046 | 17.398 | 17.492 | 20.048 | 18.885 | 14.050 |
| 2 | 0.4056 | 21.387 | 17.572 | 20.117 | 12.257 | 16.478 |
| 2 | 0.4066 | 14.798 | 15.283 | 9.302  | 13.962 | 12.233 |
| 2 | 0.4076 | 12.828 | 15.013 | 8.760  | 12.352 | 12.524 |
| 2 | 0.4086 | 16.498 | 13.604 | 13.197 | 9.634  | 10.546 |
| 2 | 0.4096 | 4.518  | 3.539  | 2.583  | 10.939 | 7.046  |
| 2 | 0.4106 | 5.398  | 3.213  | 4.817  | 10.043 | 7.517  |
| 2 | 0.4116 | 13.130 | 8.963  | 14.960 | 4.054  | 8.381  |
| 2 | 0.4126 | 8.485  | 8.480  | 9.328  | 7.289  | 10.894 |
| 2 | 0.4136 | 12.242 | 9.441  | 11.726 | 14.737 | 14.362 |
| 2 | 0.4146 | 9.090  | 8.909  | 10.374 | 5.026  | 15.564 |
| 2 | 0.4156 | 8.235  | 8.364  | 9.446  | 7.237  | 8.137  |
| 2 | 0.4166 | 3.399  | 4.132  | 5.627  | 7.858  | 4.560  |
| 2 | 0.4176 | 6.870  | 2.994  | 8.606  | 5.392  | 5.215  |
| 2 | 0.4186 | 4.254  | 3.535  | 8.770  | 10.894 | 11.365 |
| 2 | 0.4196 | 4.506  | 7.032  | 9.126  | 11.189 | 12.973 |
| 2 | 0.4206 | 3.791  | 7.801  | 5.181  | 8.521  | 15.823 |
| 2 | 0.4216 | 11.050 | 15.116 | 13.108 | 23.093 | 21.979 |
| 2 | 0.4226 | 11.675 | 6.941  | 13.071 | 15.958 | 16.248 |
| 2 | 0.4236 | 16.758 | 13.012 | 18.978 | 10.097 | 14.537 |
| 2 | 0.4246 | 16.398 | 13.525 | 17.729 | 10.127 | 20.250 |
| 2 | 0.4256 | 13.293 | 11.402 | 11.979 | 8.620  | 20.392 |
| 2 | 0.4266 | 11.435 | 9.996  | 13.266 | 2.188  | 13.200 |
| 2 | 0.4276 | 9.582  | 8.450  | 11.471 | 6.485  | 10.019 |
| 2 | 0.4286 | 13.540 | 8.789  | 12.356 | 13.516 | 9.265  |
| 2 | 0.4296 | 15.012 | 7.597  | 13.913 | 10.157 | 8.693  |
| 2 | 0.4306 | 19.894 | 15.242 | 23.483 | 12.024 | 16.479 |
| 2 | 0.4316 | 16.052 | 10.232 | 14.550 | 17.103 | 13.539 |
| 2 | 0.4326 | 6.978  | 8.974  | 7.063  | 9.484  | 12.263 |
| 2 | 0.4336 | 9.933  | 11.827 | 7.083  | 4.236  | 16.599 |
| 2 | 0.4346 | 11.375 | 9.931  | 13.080 | 7.118  | 23.768 |
| 2 | 0.4356 | 4.014  | 10.027 | 6.425  | 20.964 | 11.518 |
| 2 | 0.4366 | 8.852  | 13.414 | 13.315 | 15.979 | 7.594  |
| 2 | 0.4376 | 23.090 | 18.646 | 24.038 | 12.302 | 14.119 |
| 2 | 0.4386 | 23.166 | 15.955 | 17.376 | 6.427  | 21.495 |
| 2 | 0.4396 | 16.616 | 10.761 | 11.726 | 4.685  | 17.196 |
| 2 | 0.4406 | 16.611 | 10.764 | 11.726 | 4.689  | 17.182 |
| 2 | 0.4416 | 20.070 | 18.809 | 19.516 | 18.544 | 22.859 |
| 2 | 0.4426 | 26.612 | 19.244 | 23.280 | 17.356 | 17.798 |
| 2 | 0.4436 | 13.183 | 10.686 | 13.639 | 12.544 | 7.980  |
| 2 | 0.4446 | 8.298  | 7.130  | 13.425 | 6.230  | 7.344  |
| 2 | 0.4456 | 10.896 | 5.648  | 13.381 | 8.109  | 8.519  |
| 2 | 0.4466 | 13.106 | 7.689  | 11.787 | 17.989 | 9.445  |

|   |        |        |        |        |        |        |
|---|--------|--------|--------|--------|--------|--------|
| 2 | 0.4476 | 9.314  | 3.940  | 9.408  | 13.171 | 11.500 |
| 2 | 0.4486 | 10.227 | 7.084  | 12.194 | 15.766 | 12.039 |
| 2 | 0.4496 | 16.359 | 13.139 | 17.389 | 32.028 | 13.714 |
| 2 | 0.4506 | 5.961  | 6.763  | 7.575  | 8.786  | 5.183  |
| 2 | 0.4516 | 10.669 | 7.685  | 12.159 | 24.390 | 20.308 |
| 2 | 0.4526 | 11.123 | 11.301 | 9.415  | 23.164 | 10.099 |
| 2 | 0.4536 | 12.724 | 14.167 | 13.528 | 9.510  | 8.275  |
| 2 | 0.4546 | 11.248 | 16.570 | 13.662 | 14.072 | 25.068 |
| 2 | 0.4556 | 9.633  | 16.119 | 11.755 | 17.164 | 11.051 |
| 2 | 0.4566 | 7.327  | 10.965 | 14.110 | 16.825 | 9.239  |
| 2 | 0.4576 | 8.993  | 8.205  | 13.167 | 11.590 | 8.198  |
| 2 | 0.4586 | 4.705  | 5.928  | 5.600  | 14.654 | 11.142 |
| 2 | 0.4596 | 9.381  | 8.640  | 5.141  | 10.691 | 10.782 |
| 2 | 0.4606 | 9.597  | 15.469 | 15.000 | 20.941 | 32.322 |
| 2 | 0.4616 | 18.083 | 24.533 | 15.621 | 21.462 | 19.897 |
| 2 | 0.4626 | 12.143 | 15.655 | 12.457 | 15.046 | 11.069 |
| 2 | 0.4636 | 6.540  | 23.187 | 16.034 | 28.812 | 15.804 |
| 2 | 0.4646 | 13.414 | 12.955 | 14.384 | 18.381 | 15.193 |
| 2 | 0.4656 | 12.807 | 17.706 | 18.193 | 12.189 | 10.087 |
| 2 | 0.4666 | 13.445 | 18.193 | 11.316 | 14.010 | 11.240 |
| 2 | 0.4676 | 8.401  | 4.926  | 12.578 | 4.389  | 8.012  |
| 2 | 0.4686 | 17.450 | 10.501 | 14.999 | 10.043 | 18.517 |
| 2 | 0.4696 | 14.658 | 12.358 | 17.638 | 10.215 | 18.070 |
| 2 | 0.4706 | 9.529  | 6.682  | 7.379  | 12.883 | 11.987 |
| 2 | 0.4716 | 11.580 | 12.296 | 16.797 | 13.619 | 18.675 |
| 2 | 0.4726 | 11.566 | 12.247 | 16.778 | 13.588 | 18.751 |
| 2 | 0.4736 | 6.241  | 5.309  | 4.793  | 15.267 | 5.550  |
| 2 | 0.4746 | 6.186  | 5.108  | 4.366  | 14.350 | 2.091  |
| 2 | 0.4756 | 1.682  | 0.983  | 0.923  | 4.926  | 2.822  |
| 2 | 0.4766 | 3.421  | 1.723  | 7.328  | 11.707 | 8.718  |
| 2 | 0.4776 | 9.885  | 8.705  | 18.119 | 16.576 | 17.717 |
| 2 | 0.4786 | 21.850 | 14.507 | 17.867 | 10.287 | 6.407  |
| 2 | 0.4796 | 11.807 | 11.134 | 12.869 | 17.129 | 10.187 |
| 2 | 0.4806 | 18.063 | 12.198 | 16.082 | 26.830 | 19.075 |
| 2 | 0.4816 | 16.297 | 15.647 | 13.917 | 21.320 | 19.209 |
| 2 | 0.4826 | 15.449 | 12.750 | 13.916 | 12.364 | 19.832 |
| 2 | 0.4836 | 12.254 | 11.569 | 14.323 | 13.084 | 16.341 |
| 2 | 0.4846 | 13.979 | 13.435 | 18.801 | 11.869 | 10.869 |
| 2 | 0.4856 | 13.093 | 9.359  | 12.965 | 4.707  | 7.434  |
| 2 | 0.4866 | 15.768 | 5.291  | 18.277 | 11.899 | 8.078  |
| 2 | 0.4876 | 17.391 | 13.332 | 20.283 | 8.811  | 6.283  |
| 2 | 0.4886 | 19.054 | 11.148 | 23.043 | 9.985  | 5.726  |
| 2 | 0.4896 | 16.516 | 10.944 | 14.985 | 6.114  | 17.328 |
| 2 | 0.4906 | 21.175 | 19.654 | 23.271 | 12.258 | 25.094 |
| 2 | 0.4916 | 18.806 | 17.748 | 20.162 | 15.464 | 9.575  |
| 2 | 0.4926 | 23.875 | 17.647 | 28.969 | 13.580 | 9.584  |
| 2 | 0.4936 | 19.807 | 17.678 | 23.843 | 17.136 | 14.530 |
| 2 | 0.4946 | 14.960 | 12.537 | 18.517 | 10.924 | 18.629 |
| 2 | 0.4956 | 13.786 | 12.121 | 14.181 | 17.032 | 18.434 |
| 2 | 0.4966 | 10.448 | 10.809 | 10.671 | 11.948 | 16.185 |

|   |        |        |        |        |        |        |
|---|--------|--------|--------|--------|--------|--------|
| 2 | 0.4976 | 8.574  | 12.784 | 12.509 | 21.090 | 17.003 |
| 2 | 0.4986 | 21.764 | 17.477 | 18.851 | 18.943 | 27.367 |
| 2 | 0.4996 | 9.979  | 15.004 | 10.375 | 10.119 | 12.139 |
| 2 | 0.5006 | 20.729 | 13.275 | 18.034 | 16.090 | 11.123 |
| 2 | 0.5016 | 24.948 | 8.735  | 21.928 | 13.194 | 11.744 |
| 2 | 0.5026 | 24.737 | 12.447 | 22.653 | 11.278 | 6.924  |
| 2 | 0.5036 | 16.453 | 11.326 | 16.293 | 9.934  | 7.891  |
| 2 | 0.5046 | 19.367 | 9.626  | 18.711 | 10.495 | 9.715  |
| 2 | 0.5056 | 9.800  | 6.840  | 15.410 | 6.997  | 5.727  |
| 2 | 0.5066 | 13.688 | 14.601 | 20.654 | 4.418  | 4.041  |
| 2 | 0.5076 | 17.107 | 10.314 | 14.308 | 6.539  | 4.434  |
| 2 | 0.5086 | 25.838 | 18.024 | 21.978 | 9.554  | 7.455  |
| 2 | 0.5096 | 20.684 | 13.532 | 16.796 | 13.469 | 15.652 |
| 2 | 0.5106 | 12.201 | 7.951  | 11.929 | 11.431 | 9.455  |
| 2 | 0.5116 | 17.783 | 10.128 | 16.654 | 15.394 | 16.483 |
| 2 | 0.5126 | 17.516 | 8.461  | 15.887 | 8.898  | 7.949  |
| 2 | 0.5136 | 10.243 | 6.702  | 10.204 | 9.255  | 13.201 |
| 2 | 0.5146 | 13.424 | 8.378  | 8.800  | 7.565  | 15.571 |
| 2 | 0.5156 | 16.179 | 16.122 | 15.694 | 21.412 | 12.432 |
| 2 | 0.5166 | 7.485  | 11.313 | 15.177 | 11.411 | 10.963 |
| 2 | 0.5176 | 11.186 | 7.992  | 12.582 | 3.912  | 6.415  |
| 2 | 0.5186 | 9.813  | 7.940  | 7.995  | 6.466  | 13.113 |
| 2 | 0.5196 | 11.948 | 9.407  | 10.959 | 8.079  | 18.389 |
| 2 | 0.5206 | 14.170 | 10.782 | 11.572 | 8.386  | 9.902  |
| 2 | 0.5216 | 14.200 | 15.944 | 13.656 | 10.899 | 7.231  |
| 2 | 0.5226 | 13.607 | 12.989 | 12.137 | 16.182 | 10.810 |
| 2 | 0.5236 | 11.879 | 10.894 | 14.792 | 20.966 | 10.755 |
| 2 | 0.5246 | 12.567 | 13.112 | 11.835 | 18.297 | 8.231  |
| 2 | 0.5256 | 12.949 | 14.193 | 13.867 | 13.351 | 11.042 |
| 2 | 0.5266 | 19.968 | 20.431 | 15.059 | 27.437 | 17.831 |
| 2 | 0.5276 | 19.505 | 19.040 | 19.097 | 15.191 | 9.252  |
| 2 | 0.5286 | 6.123  | 9.471  | 8.824  | 14.232 | 9.033  |
| 2 | 0.5296 | 9.536  | 6.979  | 7.908  | 10.501 | 15.105 |
| 2 | 0.5306 | 12.286 | 12.397 | 12.044 | 18.569 | 9.093  |
| 2 | 0.5316 | 9.380  | 15.734 | 8.404  | 15.559 | 5.131  |
| 2 | 0.5326 | 7.404  | 13.648 | 8.040  | 15.376 | 4.287  |
| 2 | 0.5336 | 14.970 | 21.967 | 12.961 | 32.357 | 17.829 |
| 2 | 0.5346 | 16.248 | 20.201 | 13.880 | 19.770 | 11.477 |
| 2 | 0.5356 | 15.979 | 8.902  | 11.785 | 8.935  | 7.463  |
| 2 | 0.5366 | 18.652 | 11.451 | 15.209 | 2.877  | 5.996  |
| 2 | 0.5376 | 8.839  | 7.879  | 7.271  | 4.070  | 7.389  |
| 2 | 0.5386 | 18.553 | 11.515 | 13.464 | 7.620  | 14.079 |
| 2 | 0.5396 | 9.301  | 9.313  | 13.622 | 11.248 | 9.814  |
| 2 | 0.5406 | 22.832 | 12.667 | 14.194 | 9.155  | 17.074 |
| 2 | 0.5416 | 18.969 | 12.823 | 12.594 | 8.825  | 10.950 |
| 2 | 0.5426 | 12.817 | 13.558 | 11.850 | 5.240  | 22.152 |
| 2 | 0.5436 | 11.385 | 8.614  | 6.365  | 17.739 | 9.426  |
| 2 | 0.5446 | 12.220 | 10.557 | 11.331 | 11.076 | 9.861  |
| 2 | 0.5456 | 12.198 | 10.533 | 11.301 | 11.006 | 9.862  |
| 2 | 0.5466 | 13.483 | 10.769 | 11.251 | 14.602 | 9.908  |



|   |        |        |        |        |        |        |
|---|--------|--------|--------|--------|--------|--------|
| 2 | 0.5476 | 10.611 | 9.522  | 12.053 | 10.168 | 11.986 |
| 2 | 0.5486 | 8.325  | 6.679  | 9.045  | 9.594  | 5.522  |
| 2 | 0.5496 | 7.945  | 3.908  | 2.589  | 7.735  | 6.623  |
| 2 | 0.5506 | 6.973  | 6.990  | 4.229  | 5.721  | 5.924  |
| 2 | 0.5516 | 11.402 | 7.107  | 5.704  | 5.762  | 4.183  |
| 2 | 0.5526 | 14.654 | 13.785 | 12.091 | 9.161  | 13.017 |
| 2 | 0.5536 | 11.418 | 13.084 | 8.036  | 20.396 | 10.466 |
| 2 | 0.5546 | 12.022 | 10.189 | 6.684  | 11.276 | 7.880  |
| 2 | 0.5556 | 13.140 | 15.107 | 15.951 | 10.581 | 10.041 |
| 2 | 0.5566 | 12.369 | 10.509 | 14.010 | 10.307 | 10.061 |
| 2 | 0.5576 | 7.731  | 7.109  | 9.534  | 22.227 | 22.071 |
| 2 | 0.5586 | 6.389  | 8.507  | 4.467  | 12.327 | 13.391 |
| 2 | 0.5596 | 11.149 | 12.249 | 6.127  | 19.716 | 14.630 |
| 2 | 0.5606 | 5.281  | 8.660  | 3.723  | 21.117 | 10.543 |
| 2 | 0.5616 | 10.707 | 11.787 | 10.053 | 13.603 | 8.814  |
| 2 | 0.5626 | 15.217 | 6.669  | 8.763  | 17.900 | 20.338 |
| 2 | 0.5636 | 8.897  | 9.028  | 8.187  | 12.789 | 16.399 |
| 2 | 0.5646 | 8.973  | 8.945  | 8.169  | 12.823 | 16.331 |
| 2 | 0.5656 | 18.870 | 16.261 | 10.117 | 21.440 | 18.325 |
| 2 | 0.5666 | 11.250 | 9.323  | 8.457  | 13.640 | 6.819  |
| 2 | 0.5676 | 11.297 | 9.353  | 8.431  | 13.638 | 6.887  |
| 2 | 0.5686 | 11.345 | 9.384  | 8.403  | 13.636 | 6.954  |
| 2 | 0.5696 | 15.557 | 13.242 | 9.488  | 18.991 | 10.465 |
| 2 | 0.5706 | 17.358 | 11.159 | 12.371 | 20.576 | 13.128 |
| 2 | 0.5716 | 17.383 | 11.138 | 12.461 | 20.515 | 13.130 |
| 2 | 0.5726 | 8.866  | 8.992  | 5.102  | 15.639 | 6.589  |
| 2 | 0.5736 | 9.902  | 7.721  | 7.851  | 9.753  | 10.719 |
| 2 | 0.5746 | 8.289  | 6.919  | 5.255  | 11.568 | 5.660  |
| 2 | 0.5756 | 8.773  | 8.509  | 6.329  | 7.398  | 6.890  |
| 2 | 0.5766 | 10.703 | 5.935  | 7.287  | 5.588  | 7.800  |
| 2 | 0.5776 | 5.307  | 4.431  | 4.413  | 23.583 | 13.478 |
| 2 | 0.5786 | 4.081  | 3.854  | 1.644  | 14.442 | 11.390 |
| 2 | 0.5796 | 13.688 | 11.705 | 7.779  | 15.621 | 11.931 |
| 2 | 0.5806 | 6.886  | 2.342  | 3.652  | 3.001  | 5.715  |
| 2 | 0.5816 | 17.014 | 7.508  | 9.796  | 10.581 | 13.268 |
| 2 | 0.5826 | 21.588 | 12.033 | 15.017 | 11.872 | 8.581  |
| 2 | 0.5836 | 15.231 | 5.479  | 10.822 | 4.684  | 10.229 |
| 2 | 0.5846 | 17.445 | 9.246  | 9.720  | 9.990  | 22.195 |
| 2 | 0.5856 | 14.682 | 6.286  | 6.518  | 8.162  | 12.105 |
| 2 | 0.5866 | 11.416 | 5.612  | 6.238  | 16.528 | 10.458 |
| 2 | 0.5876 | 15.856 | 6.272  | 5.825  | 11.514 | 6.428  |
| 2 | 0.5886 | 16.050 | 12.820 | 6.927  | 8.883  | 4.561  |
| 2 | 0.5896 | 13.713 | 6.138  | 5.299  | 10.512 | 6.061  |
| 2 | 0.5906 | 9.397  | 7.480  | 5.939  | 17.310 | 3.598  |
| 2 | 0.5916 | 15.334 | 8.125  | 6.501  | 20.889 | 16.591 |
| 2 | 0.5926 | 15.922 | 4.636  | 5.758  | 10.061 | 9.198  |
| 2 | 0.5936 | 11.053 | 4.808  | 6.127  | 4.078  | 4.549  |
| 2 | 0.5946 | 19.786 | 17.390 | 12.686 | 24.873 | 10.128 |
| 2 | 0.5956 | 19.737 | 17.382 | 12.641 | 24.867 | 10.193 |
| 2 | 0.5966 | 19.478 | 19.205 | 15.088 | 16.359 | 19.083 |

|   |        |        |        |        |        |        |
|---|--------|--------|--------|--------|--------|--------|
| 2 | 0.5976 | 16.955 | 13.963 | 13.606 | 7.636  | 22.152 |
| 2 | 0.5986 | 14.600 | 7.446  | 8.278  | 14.852 | 14.841 |
| 2 | 0.5996 | 13.625 | 8.794  | 7.054  | 17.472 | 12.685 |
| 2 | 0.6006 | 22.817 | 8.825  | 11.519 | 16.444 | 13.842 |
| 2 | 0.6016 | 22.790 | 8.887  | 11.492 | 16.277 | 13.848 |
| 2 | 0.6026 | 15.112 | 4.958  | 7.718  | 5.408  | 10.011 |
| 2 | 0.6036 | 6.480  | 5.128  | 5.173  | 5.769  | 8.674  |
| 2 | 0.6046 | 6.463  | 5.118  | 5.176  | 5.771  | 8.649  |
| 2 | 0.6056 | 18.432 | 14.058 | 10.225 | 9.372  | 12.368 |
| 2 | 0.6066 | 8.712  | 4.585  | 5.818  | 5.820  | 10.885 |
| 2 | 0.6076 | 19.970 | 7.516  | 13.042 | 9.205  | 11.853 |
| 2 | 0.6086 | 15.488 | 3.916  | 10.482 | 4.031  | 6.781  |
| 2 | 0.6096 | 8.558  | 4.547  | 5.542  | 7.383  | 13.042 |
| 2 | 0.6106 | 15.793 | 6.480  | 12.134 | 9.052  | 6.516  |
| 2 | 0.6116 | 7.490  | 6.248  | 9.653  | 8.098  | 7.232  |
| 2 | 0.6126 | 14.065 | 7.611  | 13.365 | 11.303 | 4.207  |
| 2 | 0.6136 | 12.624 | 12.230 | 7.234  | 16.691 | 11.706 |
| 2 | 0.6146 | 11.189 | 11.269 | 7.700  | 12.419 | 10.014 |
| 2 | 0.6156 | 12.090 | 10.397 | 8.887  | 11.446 | 7.961  |
| 2 | 0.6166 | 13.765 | 7.040  | 10.132 | 8.023  | 7.416  |
| 2 | 0.6176 | 11.643 | 12.360 | 12.792 | 19.815 | 6.845  |
| 2 | 0.6186 | 9.867  | 6.685  | 9.269  | 12.277 | 8.747  |
| 2 | 0.6196 | 16.683 | 8.261  | 7.859  | 24.416 | 11.573 |
| 2 | 0.6206 | 14.472 | 8.675  | 9.151  | 21.842 | 14.659 |
| 2 | 0.6216 | 9.173  | 4.907  | 4.922  | 12.740 | 14.047 |
| 2 | 0.6226 | 17.858 | 12.855 | 10.528 | 13.634 | 9.915  |
| 2 | 0.6236 | 14.856 | 7.928  | 9.561  | 13.645 | 10.965 |
| 2 | 0.6246 | 8.668  | 7.022  | 7.624  | 16.261 | 13.923 |
| 2 | 0.6256 | 14.474 | 3.910  | 11.646 | 10.578 | 6.095  |
| 2 | 0.6266 | 13.151 | 5.191  | 8.970  | 9.645  | 15.442 |
| 2 | 0.6276 | 14.612 | 11.800 | 6.718  | 8.626  | 16.571 |
| 2 | 0.6286 | 14.611 | 11.800 | 6.717  | 8.626  | 16.573 |
| 2 | 0.6296 | 7.262  | 7.587  | 4.000  | 7.896  | 11.049 |
| 2 | 0.6306 | 12.333 | 5.475  | 11.776 | 7.967  | 11.260 |
| 2 | 0.6316 | 9.334  | 6.944  | 4.377  | 11.094 | 13.492 |
| 2 | 0.6326 | 17.457 | 21.264 | 11.902 | 10.237 | 19.989 |
| 2 | 0.6336 | 19.020 | 21.392 | 17.013 | 15.189 | 16.951 |
| 2 | 0.6346 | 9.793  | 6.804  | 8.330  | 7.591  | 19.776 |
| 2 | 0.6356 | 12.025 | 4.680  | 6.969  | 4.983  | 16.393 |
| 2 | 0.6366 | 14.397 | 14.971 | 11.978 | 7.789  | 17.419 |
| 2 | 0.6376 | 19.964 | 13.617 | 15.283 | 7.779  | 25.269 |
| 2 | 0.6386 | 28.692 | 15.173 | 17.653 | 23.524 | 21.955 |
| 2 | 0.6396 | 23.169 | 8.761  | 11.981 | 18.603 | 22.910 |
| 2 | 0.6406 | 11.210 | 5.642  | 4.227  | 10.197 | 18.099 |
| 2 | 0.6416 | 20.105 | 7.014  | 12.944 | 7.208  | 18.970 |
| 2 | 0.6426 | 14.602 | 8.985  | 7.589  | 11.720 | 9.445  |
| 2 | 0.6436 | 12.851 | 6.029  | 5.415  | 13.381 | 20.511 |
| 2 | 0.6446 | 16.922 | 13.400 | 12.704 | 28.368 | 11.695 |
| 2 | 0.6456 | 20.494 | 10.969 | 8.269  | 8.071  | 14.459 |
| 2 | 0.6466 | 34.283 | 6.036  | 13.048 | 11.705 | 14.695 |

|   |        |        |        |        |        |        |
|---|--------|--------|--------|--------|--------|--------|
| 2 | 0.6476 | 38.785 | 8.267  | 15.838 | 16.905 | 12.167 |
| 2 | 0.6486 | 38.782 | 8.266  | 15.837 | 16.906 | 12.169 |
| 2 | 0.6496 | 12.867 | 6.364  | 10.816 | 10.233 | 18.889 |
| 2 | 0.6506 | 11.410 | 9.256  | 9.116  | 11.527 | 15.910 |
| 2 | 0.6516 | 11.426 | 5.060  | 10.919 | 14.105 | 11.321 |
| 2 | 0.6526 | 21.172 | 12.128 | 11.230 | 9.498  | 5.002  |
| 2 | 0.6536 | 17.773 | 9.976  | 9.380  | 10.471 | 7.714  |
| 2 | 0.6546 | 10.957 | 6.320  | 7.873  | 7.274  | 6.796  |
| 2 | 0.6556 | 17.700 | 7.944  | 6.261  | 7.066  | 10.143 |
| 2 | 0.6566 | 14.807 | 7.454  | 7.958  | 4.369  | 10.316 |
| 2 | 0.6576 | 20.317 | 13.011 | 11.698 | 12.189 | 14.126 |
| 2 | 0.6586 | 11.980 | 6.520  | 8.632  | 6.203  | 9.909  |
| 2 | 0.6596 | 21.148 | 6.627  | 14.788 | 6.615  | 1.255  |
| 2 | 0.6606 | 33.257 | 16.876 | 25.467 | 20.129 | 10.861 |
| 2 | 0.6616 | 16.628 | 13.835 | 13.326 | 13.774 | 14.312 |
| 2 | 0.6626 | 24.809 | 8.828  | 14.200 | 16.296 | 10.042 |
| 2 | 0.6636 | 25.507 | 11.620 | 13.420 | 13.238 | 10.535 |
| 2 | 0.6646 | 22.599 | 10.717 | 14.711 | 7.941  | 6.646  |
| 2 | 0.6656 | 9.946  | 13.193 | 12.034 | 10.561 | 12.816 |
| 2 | 0.6666 | 12.224 | 9.685  | 10.953 | 6.346  | 8.318  |
| 2 | 0.6676 | 17.482 | 9.986  | 14.532 | 11.741 | 9.481  |
| 2 | 0.6686 | 9.204  | 7.053  | 14.797 | 7.933  | 4.543  |
| 2 | 0.6696 | 12.530 | 10.011 | 18.545 | 8.297  | 14.460 |
| 2 | 0.6706 | 16.556 | 14.855 | 18.325 | 10.557 | 7.062  |
| 2 | 0.6716 | 8.925  | 10.764 | 10.683 | 15.846 | 7.619  |
| 2 | 0.6726 | 9.299  | 5.286  | 8.307  | 9.281  | 3.709  |
| 2 | 0.6736 | 14.558 | 8.041  | 8.456  | 4.671  | 3.381  |
| 2 | 0.6746 | 10.243 | 1.923  | 7.302  | 4.014  | 5.964  |
| 2 | 0.6756 | 11.596 | 7.065  | 12.127 | 5.259  | 9.602  |
| 2 | 0.6766 | 14.691 | 12.997 | 14.692 | 12.317 | 8.959  |
| 2 | 0.6776 | 13.219 | 13.265 | 14.948 | 3.222  | 8.523  |
| 2 | 0.6786 | 8.506  | 8.184  | 8.814  | 8.995  | 5.371  |
| 2 | 0.6796 | 16.408 | 19.528 | 18.555 | 14.458 | 6.674  |
| 2 | 0.6806 | 16.464 | 10.776 | 13.586 | 11.222 | 3.616  |
| 2 | 0.6816 | 19.272 | 14.559 | 16.334 | 21.978 | 7.125  |
| 2 | 0.6826 | 11.268 | 12.511 | 13.083 | 16.521 | 7.238  |
| 2 | 0.6836 | 8.341  | 8.640  | 6.451  | 10.904 | 6.270  |
| 2 | 0.6846 | 10.530 | 11.298 | 6.814  | 9.204  | 15.415 |
| 2 | 0.6856 | 9.391  | 8.759  | 11.357 | 15.157 | 10.772 |
| 2 | 0.6866 | 13.651 | 17.280 | 17.875 | 12.165 | 11.179 |
| 2 | 0.6876 | 18.832 | 12.143 | 14.086 | 10.856 | 9.399  |
| 2 | 0.6886 | 18.442 | 11.636 | 12.176 | 17.218 | 16.749 |
| 2 | 0.6896 | 6.428  | 10.947 | 8.817  | 9.160  | 11.027 |
| 2 | 0.6906 | 11.977 | 10.609 | 9.498  | 7.307  | 12.490 |
| 2 | 0.6916 | 8.516  | 3.600  | 7.820  | 5.518  | 10.629 |
| 2 | 0.6926 | 8.976  | 6.910  | 7.338  | 2.801  | 4.686  |
| 2 | 0.6936 | 10.886 | 9.621  | 16.195 | 18.336 | 14.858 |
| 2 | 0.6946 | 11.011 | 6.231  | 9.444  | 7.477  | 2.889  |
| 2 | 0.6956 | 11.344 | 8.223  | 9.884  | 15.554 | 4.933  |
| 2 | 0.6966 | 17.922 | 16.006 | 23.866 | 10.156 | 8.742  |

|   |        |        |        |        |        |        |
|---|--------|--------|--------|--------|--------|--------|
| 2 | 0.6976 | 24.949 | 15.032 | 21.686 | 11.270 | 11.904 |
| 2 | 0.6986 | 21.462 | 11.487 | 16.705 | 9.912  | 23.934 |
| 2 | 0.6996 | 13.296 | 16.936 | 17.696 | 9.576  | 19.460 |
| 2 | 0.7006 | 7.257  | 12.510 | 12.697 | 13.418 | 12.976 |
| 2 | 0.7016 | 9.023  | 5.286  | 9.764  | 5.933  | 10.605 |
| 2 | 0.7026 | 9.018  | 5.285  | 9.759  | 5.930  | 10.604 |
| 2 | 0.7036 | 23.028 | 10.024 | 18.322 | 12.419 | 9.499  |
| 2 | 0.7046 | 5.051  | 5.574  | 6.919  | 12.262 | 14.141 |
| 2 | 0.7056 | 4.502  | 1.514  | 5.887  | 14.099 | 8.243  |
| 2 | 0.7066 | 9.235  | 6.745  | 9.714  | 13.577 | 11.452 |
| 2 | 0.7076 | 2.165  | 1.839  | 4.100  | 11.126 | 6.018  |
| 2 | 0.7086 | 2.165  | 1.839  | 4.097  | 11.125 | 5.971  |
| 2 | 0.7096 | 2.038  | 2.087  | 3.264  | 7.642  | 10.487 |
| 2 | 0.7106 | 3.047  | 2.599  | 3.118  | 7.923  | 10.500 |
| 2 | 0.7116 | 3.037  | 2.599  | 3.107  | 7.912  | 10.466 |
| 2 | 0.7126 | 5.556  | 5.355  | 9.267  | 8.377  | 8.701  |
| 2 | 0.7136 | 13.459 | 9.557  | 11.394 | 16.726 | 13.532 |
| 2 | 0.7146 | 11.899 | 9.528  | 14.304 | 8.732  | 10.685 |
| 2 | 0.7156 | 7.581  | 8.253  | 8.957  | 7.511  | 8.905  |
| 2 | 0.7166 | 3.224  | 4.786  | 3.965  | 10.233 | 5.728  |
| 2 | 0.7176 | 6.078  | 5.974  | 6.851  | 11.805 | 5.555  |
| 2 | 0.7186 | 13.906 | 10.138 | 12.834 | 12.500 | 7.074  |
| 2 | 0.7196 | 16.255 | 11.497 | 21.726 | 11.188 | 21.676 |
| 2 | 0.7206 | 11.444 | 6.483  | 11.817 | 7.671  | 13.522 |
| 2 | 0.7216 | 11.782 | 11.333 | 11.799 | 5.000  | 16.364 |
| 2 | 0.7226 | 13.413 | 10.909 | 11.061 | 4.594  | 19.516 |
| 2 | 0.7236 | 3.854  | 4.392  | 4.670  | 5.883  | 13.544 |
| 2 | 0.7246 | 8.906  | 4.348  | 7.431  | 3.755  | 10.839 |
| 2 | 0.7256 | 21.906 | 12.165 | 17.841 | 14.239 | 18.260 |
| 2 | 0.7266 | 6.596  | 9.052  | 8.694  | 12.422 | 17.782 |
| 2 | 0.7276 | 4.524  | 7.040  | 6.678  | 14.602 | 9.276  |
| 2 | 0.7286 | 11.431 | 11.584 | 13.337 | 20.413 | 11.477 |
| 2 | 0.7296 | 8.924  | 8.773  | 12.052 | 15.992 | 10.386 |
| 2 | 0.7306 | 13.835 | 6.438  | 11.075 | 13.317 | 13.831 |
| 2 | 0.7316 | 10.601 | 6.739  | 7.768  | 5.965  | 3.123  |
| 2 | 0.7326 | 21.051 | 8.236  | 17.549 | 17.462 | 14.496 |
| 2 | 0.7336 | 22.687 | 9.122  | 17.057 | 16.199 | 11.207 |
| 2 | 0.7346 | 11.192 | 6.554  | 13.649 | 11.924 | 10.330 |
| 2 | 0.7356 | 12.755 | 12.388 | 15.571 | 7.137  | 9.511  |
| 2 | 0.7366 | 8.602  | 7.796  | 9.814  | 8.312  | 4.548  |
| 2 | 0.7376 | 15.213 | 10.665 | 16.091 | 12.552 | 7.402  |
| 2 | 0.7386 | 10.594 | 5.607  | 9.504  | 13.889 | 15.108 |
| 2 | 0.7396 | 9.281  | 10.355 | 9.122  | 15.749 | 7.435  |
| 2 | 0.7406 | 20.738 | 10.923 | 15.985 | 12.665 | 11.647 |
| 2 | 0.7416 | 21.629 | 8.106  | 19.264 | 13.661 | 19.389 |
| 2 | 0.7426 | 9.217  | 11.878 | 13.992 | 16.595 | 13.597 |
| 2 | 0.7436 | 7.514  | 4.451  | 5.641  | 9.194  | 5.100  |
| 2 | 0.7446 | 13.831 | 7.048  | 13.357 | 7.807  | 5.618  |
| 2 | 0.7456 | 25.966 | 8.163  | 22.503 | 15.369 | 6.774  |
| 2 | 0.7466 | 10.728 | 6.263  | 8.925  | 9.870  | 12.790 |

|   |        |        |        |        |        |        |
|---|--------|--------|--------|--------|--------|--------|
| 2 | 0.7476 | 7.831  | 7.920  | 9.826  | 3.310  | 9.422  |
| 2 | 0.7486 | 7.838  | 7.923  | 9.831  | 3.381  | 9.435  |
| 2 | 0.7496 | 5.371  | 4.364  | 7.835  | 8.143  | 10.357 |
| 2 | 0.7506 | 11.128 | 10.171 | 14.735 | 17.569 | 11.570 |
| 2 | 0.7516 | 15.516 | 10.197 | 15.485 | 13.975 | 9.226  |
| 2 | 0.7526 | 12.071 | 8.442  | 10.495 | 13.548 | 11.347 |
| 2 | 0.7536 | 20.060 | 10.966 | 17.441 | 13.507 | 9.476  |
| 2 | 0.7546 | 13.661 | 11.934 | 12.217 | 12.961 | 10.638 |
| 2 | 0.7556 | 17.454 | 10.682 | 12.945 | 13.169 | 12.843 |
| 2 | 0.7566 | 14.545 | 9.386  | 13.822 | 10.857 | 10.931 |
| 2 | 0.7576 | 16.293 | 8.928  | 12.248 | 13.541 | 9.672  |
| 2 | 0.7586 | 9.786  | 6.412  | 7.442  | 10.628 | 7.905  |
| 2 | 0.7596 | 12.406 | 7.550  | 10.473 | 14.597 | 10.211 |
| 2 | 0.7606 | 11.813 | 10.974 | 12.231 | 15.692 | 14.722 |
| 2 | 0.7616 | 12.112 | 11.359 | 12.991 | 12.446 | 12.756 |
| 2 | 0.7626 | 9.035  | 5.855  | 10.177 | 13.477 | 9.733  |
| 2 | 0.7636 | 5.082  | 2.763  | 4.639  | 6.072  | 4.607  |
| 2 | 0.7646 | 7.447  | 6.762  | 6.630  | 8.115  | 10.293 |
| 2 | 0.7656 | 2.317  | 1.309  | 1.622  | 5.706  | 7.724  |
| 2 | 0.7666 | 6.483  | 6.541  | 4.723  | 12.646 | 5.449  |
| 2 | 0.7676 | 10.669 | 9.145  | 8.017  | 8.403  | 9.178  |
| 2 | 0.7686 | 10.821 | 5.208  | 10.523 | 10.015 | 7.591  |
| 2 | 0.7696 | 13.642 | 9.381  | 12.800 | 11.710 | 6.474  |
| 2 | 0.7706 | 9.936  | 6.858  | 7.016  | 5.651  | 8.245  |
| 2 | 0.7716 | 12.172 | 3.215  | 8.475  | 13.619 | 12.090 |
| 2 | 0.7726 | 10.755 | 2.892  | 7.420  | 12.278 | 10.807 |
| 2 | 0.7736 | 16.707 | 8.694  | 13.177 | 15.185 | 12.412 |
| 2 | 0.7746 | 2.021  | 2.829  | 3.172  | 2.491  | 3.167  |
| 2 | 0.7756 | 10.180 | 6.745  | 10.239 | 5.341  | 6.846  |
| 2 | 0.7766 | 10.179 | 6.750  | 10.242 | 5.344  | 6.852  |
| 2 | 0.7776 | 13.192 | 8.091  | 13.731 | 12.762 | 4.340  |
| 2 | 0.7786 | 8.957  | 6.251  | 9.585  | 5.363  | 7.370  |
| 2 | 0.7796 | 12.651 | 6.841  | 10.211 | 5.287  | 7.537  |
| 2 | 0.7806 | 8.148  | 7.206  | 7.643  | 7.911  | 4.607  |
| 2 | 0.7816 | 6.864  | 3.609  | 5.422  | 3.789  | 2.350  |
| 2 | 0.7826 | 4.863  | 5.491  | 4.228  | 23.967 | 10.986 |
| 2 | 0.7836 | 13.021 | 11.563 | 10.862 | 28.469 | 16.696 |
| 2 | 0.7846 | 15.710 | 10.779 | 12.776 | 15.759 | 9.829  |
| 2 | 0.7856 | 10.447 | 5.823  | 6.129  | 11.280 | 6.906  |
| 2 | 0.7866 | 6.479  | 6.525  | 4.296  | 14.816 | 3.225  |
| 2 | 0.7876 | 3.892  | 8.002  | 4.295  | 17.136 | 4.648  |
| 2 | 0.7886 | 8.340  | 11.386 | 7.313  | 13.732 | 6.830  |
| 2 | 0.7896 | 10.371 | 6.349  | 9.508  | 7.317  | 4.822  |
| 2 | 0.7906 | 11.312 | 9.962  | 10.305 | 9.558  | 6.401  |
| 2 | 0.7916 | 12.948 | 8.835  | 8.428  | 8.970  | 5.274  |
| 2 | 0.7926 | 20.663 | 13.976 | 12.805 | 19.931 | 8.530  |
| 2 | 0.7936 | 20.713 | 14.109 | 12.842 | 20.071 | 8.481  |
| 2 | 0.7946 | 22.787 | 16.105 | 23.539 | 15.812 | 16.307 |
| 2 | 0.7956 | 11.181 | 8.502  | 12.611 | 5.915  | 11.143 |
| 2 | 0.7966 | 9.816  | 7.716  | 9.908  | 15.149 | 14.137 |

|   |        |        |        |        |        |        |
|---|--------|--------|--------|--------|--------|--------|
| 2 | 0.7976 | 18.879 | 14.847 | 19.717 | 14.068 | 12.404 |
| 2 | 0.7986 | 11.645 | 5.115  | 10.687 | 10.884 | 10.270 |
| 2 | 0.7996 | 15.512 | 13.869 | 14.095 | 20.590 | 12.203 |
| 2 | 0.8006 | 13.052 | 10.981 | 10.526 | 10.646 | 20.196 |
| 2 | 0.8016 | 29.259 | 15.389 | 24.996 | 14.129 | 21.105 |
| 2 | 0.8026 | 21.541 | 11.522 | 18.905 | 11.071 | 22.580 |
| 2 | 0.8036 | 14.792 | 11.267 | 14.249 | 14.500 | 22.730 |
| 2 | 0.8046 | 19.257 | 8.767  | 18.440 | 10.140 | 13.680 |
| 2 | 0.8056 | 20.219 | 9.899  | 18.006 | 12.469 | 9.831  |
| 2 | 0.8066 | 8.549  | 6.575  | 8.504  | 11.181 | 9.646  |
| 2 | 0.8076 | 8.550  | 6.576  | 8.506  | 11.181 | 9.634  |
| 2 | 0.8086 | 8.550  | 6.578  | 8.507  | 11.181 | 9.622  |
| 2 | 0.8096 | 17.871 | 9.431  | 11.535 | 10.712 | 12.779 |
| 2 | 0.8106 | 24.425 | 12.424 | 20.606 | 13.306 | 14.962 |
| 2 | 0.8116 | 14.386 | 9.529  | 11.567 | 10.046 | 21.192 |
| 2 | 0.8126 | 21.081 | 9.428  | 14.111 | 10.641 | 17.202 |
| 2 | 0.8136 | 14.015 | 6.642  | 11.373 | 15.831 | 11.046 |
| 2 | 0.8146 | 14.048 | 5.697  | 8.770  | 10.685 | 6.765  |
| 2 | 0.8156 | 12.870 | 7.958  | 10.234 | 4.670  | 19.194 |
| 2 | 0.8166 | 15.249 | 9.646  | 11.901 | 5.851  | 12.774 |
| 2 | 0.8176 | 17.981 | 10.468 | 12.025 | 5.896  | 13.909 |
| 2 | 0.8186 | 20.375 | 11.724 | 13.834 | 4.553  | 13.223 |
| 2 | 0.8196 | 7.737  | 5.095  | 5.100  | 2.374  | 6.441  |
| 2 | 0.8206 | 7.062  | 7.404  | 9.567  | 6.372  | 13.732 |
| 2 | 0.8216 | 4.905  | 7.099  | 7.738  | 5.955  | 9.066  |
| 2 | 0.8226 | 12.948 | 5.560  | 15.575 | 12.446 | 6.621  |
| 2 | 0.8236 | 20.364 | 12.227 | 20.745 | 21.161 | 6.682  |
| 2 | 0.8246 | 21.841 | 12.967 | 18.355 | 13.499 | 7.914  |
| 2 | 0.8256 | 16.396 | 9.504  | 12.135 | 5.456  | 11.351 |
| 2 | 0.8266 | 15.316 | 10.763 | 12.706 | 5.240  | 9.825  |
| 2 | 0.8276 | 7.953  | 7.252  | 7.028  | 11.498 | 7.388  |
| 2 | 0.8286 | 13.879 | 6.074  | 9.621  | 23.688 | 7.729  |
| 2 | 0.8296 | 8.557  | 6.937  | 9.011  | 13.707 | 12.030 |
| 2 | 0.8306 | 9.802  | 5.397  | 9.935  | 11.907 | 13.068 |
| 2 | 0.8316 | 11.680 | 4.575  | 9.015  | 12.899 | 15.731 |
| 2 | 0.8326 | 11.680 | 4.574  | 9.015  | 12.900 | 15.730 |
| 2 | 0.8336 | 13.330 | 5.592  | 12.214 | 11.295 | 19.542 |
| 2 | 0.8346 | 7.176  | 1.879  | 6.587  | 7.951  | 6.429  |
| 2 | 0.8356 | 14.547 | 6.720  | 13.968 | 9.520  | 7.093  |
| 2 | 0.8366 | 14.460 | 6.382  | 12.919 | 5.268  | 9.541  |
| 2 | 0.8376 | 10.730 | 12.581 | 14.024 | 11.879 | 20.586 |
| 2 | 0.8386 | 18.821 | 14.420 | 19.688 | 17.692 | 14.174 |
| 2 | 0.8396 | 18.701 | 14.441 | 19.615 | 17.689 | 14.012 |
| 2 | 0.8406 | 11.115 | 10.305 | 10.005 | 18.837 | 11.956 |
| 2 | 0.8416 | 9.579  | 9.158  | 9.376  | 15.976 | 7.417  |
| 2 | 0.8426 | 10.247 | 8.031  | 10.056 | 16.955 | 13.406 |
| 2 | 0.8436 | 13.114 | 8.138  | 12.848 | 19.722 | 11.182 |
| 2 | 0.8446 | 17.789 | 4.593  | 14.331 | 14.503 | 8.857  |
| 2 | 0.8456 | 12.395 | 2.686  | 8.695  | 9.403  | 13.507 |
| 2 | 0.8466 | 14.712 | 8.305  | 13.282 | 14.367 | 15.107 |

|   |        |        |        |        |        |        |
|---|--------|--------|--------|--------|--------|--------|
| 2 | 0.8476 | 3.285  | 5.285  | 4.387  | 8.667  | 10.551 |
| 2 | 0.8486 | 5.722  | 5.238  | 4.563  | 11.994 | 7.197  |
| 2 | 0.8496 | 7.260  | 7.371  | 4.192  | 17.725 | 9.592  |
| 2 | 0.8506 | 14.404 | 15.092 | 12.544 | 31.697 | 18.545 |
| 2 | 0.8516 | 6.882  | 11.338 | 5.652  | 32.369 | 16.684 |
| 2 | 0.8526 | 5.942  | 6.482  | 3.992  | 13.740 | 13.470 |
| 2 | 0.8536 | 5.942  | 6.481  | 3.993  | 13.741 | 13.469 |
| 2 | 0.8546 | 7.869  | 3.182  | 4.219  | 15.565 | 5.149  |
| 2 | 0.8556 | 3.882  | 6.296  | 5.235  | 2.381  | 2.701  |
| 2 | 0.8566 | 9.726  | 18.671 | 10.972 | 11.889 | 9.921  |
| 2 | 0.8576 | 11.117 | 12.055 | 8.247  | 14.316 | 14.049 |
| 2 | 0.8586 | 7.230  | 4.951  | 4.721  | 6.459  | 16.056 |
| 2 | 0.8596 | 9.580  | 12.769 | 9.383  | 5.090  | 8.043  |
| 2 | 0.8606 | 14.239 | 9.956  | 13.103 | 14.502 | 8.506  |
| 2 | 0.8616 | 10.842 | 8.649  | 7.486  | 19.745 | 18.035 |
| 2 | 0.8626 | 2.929  | 6.480  | 4.617  | 26.227 | 12.355 |
| 2 | 0.8636 | 8.838  | 7.714  | 8.933  | 7.972  | 8.400  |
| 2 | 0.8646 | 18.393 | 10.952 | 16.659 | 14.741 | 5.083  |
| 2 | 0.8656 | 16.939 | 11.433 | 16.008 | 16.737 | 9.470  |
| 2 | 0.8666 | 15.805 | 11.752 | 17.259 | 15.109 | 16.429 |
| 2 | 0.8676 | 6.668  | 11.073 | 8.651  | 13.534 | 8.543  |
| 2 | 0.8686 | 3.791  | 11.556 | 5.625  | 14.637 | 8.005  |
| 2 | 0.8696 | 6.446  | 5.798  | 10.032 | 10.052 | 8.426  |
| 2 | 0.8706 | 14.764 | 12.096 | 12.238 | 11.902 | 19.669 |
| 2 | 0.8716 | 24.051 | 20.515 | 22.785 | 9.175  | 9.503  |
| 2 | 0.8726 | 9.348  | 8.268  | 11.806 | 8.292  | 14.818 |
| 2 | 0.8736 | 14.095 | 11.391 | 16.216 | 11.238 | 10.573 |
| 2 | 0.8746 | 23.052 | 21.646 | 24.276 | 7.966  | 3.950  |
| 2 | 0.8756 | 16.371 | 14.330 | 17.738 | 17.659 | 18.830 |
| 2 | 0.8766 | 16.345 | 14.117 | 17.609 | 17.545 | 18.671 |
| 2 | 0.8776 | 13.297 | 8.608  | 13.146 | 12.825 | 7.026  |
| 2 | 0.8786 | 11.336 | 5.576  | 13.473 | 11.699 | 8.947  |
| 2 | 0.8796 | 16.298 | 10.845 | 12.506 | 12.144 | 19.414 |
| 2 | 0.8806 | 18.695 | 14.940 | 18.841 | 10.205 | 12.104 |
| 2 | 0.8816 | 19.816 | 18.001 | 24.928 | 19.570 | 4.064  |
| 2 | 0.8826 | 16.757 | 10.799 | 16.772 | 11.534 | 11.376 |
| 2 | 0.8836 | 13.390 | 7.041  | 10.823 | 6.240  | 6.394  |
| 2 | 0.8846 | 19.090 | 13.850 | 14.504 | 8.649  | 5.625  |
| 2 | 0.8856 | 12.185 | 8.573  | 8.809  | 18.916 | 12.721 |
| 2 | 0.8866 | 17.080 | 8.310  | 10.115 | 10.929 | 14.911 |
| 2 | 0.8876 | 15.130 | 13.504 | 11.788 | 5.279  | 11.049 |
| 2 | 0.8886 | 12.558 | 12.664 | 10.705 | 4.125  | 19.026 |
| 2 | 0.8896 | 7.660  | 8.643  | 7.854  | 3.027  | 3.009  |
| 2 | 0.8906 | 22.124 | 26.097 | 22.385 | 11.786 | 5.785  |
| 2 | 0.8916 | 22.015 | 26.025 | 22.303 | 11.703 | 5.860  |
| 2 | 0.8926 | 14.544 | 14.180 | 12.716 | 17.698 | 9.719  |
| 2 | 0.8936 | 16.044 | 14.994 | 14.417 | 7.142  | 3.334  |
| 2 | 0.8946 | 11.922 | 10.428 | 11.285 | 12.295 | 2.640  |
| 2 | 0.8956 | 18.365 | 17.184 | 15.745 | 10.711 | 4.927  |
| 2 | 0.8966 | 13.783 | 15.897 | 12.380 | 14.367 | 5.514  |

|   |        |        |        |        |        |        |
|---|--------|--------|--------|--------|--------|--------|
| 2 | 0.8976 | 15.614 | 17.123 | 13.583 | 12.190 | 13.511 |
| 2 | 0.8986 | 24.255 | 31.333 | 19.132 | 20.641 | 9.804  |
| 2 | 0.8996 | 27.875 | 28.903 | 20.917 | 11.211 | 9.462  |
| 2 | 0.9006 | 5.848  | 9.953  | 4.630  | 9.050  | 14.045 |
| 2 | 0.9016 | 9.376  | 6.161  | 8.442  | 10.349 | 7.629  |
| 2 | 0.9026 | 10.867 | 6.352  | 11.229 | 9.655  | 6.689  |
| 2 | 0.9036 | 9.061  | 8.600  | 9.398  | 11.482 | 11.165 |
| 2 | 0.9046 | 11.579 | 13.810 | 10.254 | 8.746  | 8.314  |
| 2 | 0.9056 | 10.836 | 10.180 | 10.159 | 7.816  | 9.983  |
| 2 | 0.9066 | 7.254  | 10.146 | 10.716 | 6.167  | 5.376  |
| 2 | 0.9076 | 9.029  | 10.668 | 11.558 | 6.589  | 5.694  |
| 2 | 0.9086 | 10.402 | 9.415  | 6.895  | 8.590  | 8.207  |
| 2 | 0.9096 | 11.572 | 11.902 | 9.610  | 7.454  | 5.787  |
| 2 | 0.9106 | 12.196 | 17.097 | 13.241 | 5.819  | 4.668  |
| 2 | 0.9116 | 15.451 | 23.206 | 19.768 | 9.981  | 9.466  |
| 2 | 0.9126 | 15.262 | 15.936 | 16.630 | 5.648  | 7.436  |
| 2 | 0.9136 | 14.014 | 20.659 | 16.869 | 12.264 | 8.495  |
| 2 | 0.9146 | 23.958 | 19.489 | 20.653 | 16.052 | 7.043  |
| 2 | 0.9156 | 22.957 | 21.859 | 18.575 | 15.969 | 12.490 |
| 2 | 0.9166 | 31.723 | 22.472 | 27.274 | 15.229 | 11.131 |
| 2 | 0.9176 | 10.279 | 22.742 | 14.482 | 17.447 | 8.765  |
| 2 | 0.9186 | 17.540 | 17.017 | 13.614 | 22.317 | 16.612 |
| 2 | 0.9196 | 13.959 | 7.830  | 7.470  | 12.423 | 14.867 |
| 2 | 0.9206 | 20.489 | 26.878 | 19.964 | 20.106 | 12.904 |
| 2 | 0.9216 | 17.941 | 20.277 | 16.372 | 17.577 | 10.069 |
| 2 | 0.9226 | 6.803  | 11.763 | 5.657  | 9.183  | 8.667  |
| 2 | 0.9236 | 11.783 | 15.382 | 8.844  | 5.626  | 13.408 |
| 2 | 0.9246 | 16.127 | 18.605 | 16.296 | 13.431 | 12.667 |
| 2 | 0.9256 | 22.510 | 15.148 | 15.173 | 11.949 | 8.829  |
| 2 | 0.9266 | 11.829 | 9.286  | 7.842  | 13.102 | 10.917 |
| 2 | 0.9276 | 14.477 | 7.183  | 9.410  | 13.316 | 8.580  |
| 2 | 0.9286 | 22.089 | 13.257 | 16.567 | 7.941  | 10.573 |
| 2 | 0.9296 | 13.536 | 11.365 | 11.106 | 11.443 | 8.799  |
| 2 | 0.9306 | 5.576  | 7.663  | 7.472  | 15.494 | 14.933 |
| 2 | 0.9316 | 2.334  | 3.993  | 5.313  | 7.121  | 7.048  |
| 2 | 0.9326 | 3.720  | 9.289  | 10.120 | 7.466  | 7.738  |
| 2 | 0.9336 | 8.667  | 8.554  | 4.948  | 12.201 | 9.675  |
| 2 | 0.9346 | 23.408 | 19.919 | 15.763 | 14.581 | 13.775 |
| 2 | 0.9356 | 19.587 | 16.330 | 14.237 | 16.179 | 8.382  |
| 2 | 0.9366 | 17.094 | 7.954  | 14.346 | 3.267  | 6.360  |
| 2 | 0.9376 | 22.569 | 17.896 | 21.700 | 27.627 | 8.520  |
| 2 | 0.9386 | 25.592 | 13.121 | 21.802 | 24.467 | 13.806 |
| 2 | 0.9396 | 26.666 | 14.071 | 20.056 | 14.837 | 10.525 |
| 2 | 0.9406 | 14.594 | 15.065 | 10.363 | 18.096 | 14.733 |
| 2 | 0.9416 | 14.000 | 12.646 | 11.500 | 18.469 | 17.178 |
| 2 | 0.9426 | 21.965 | 16.145 | 19.915 | 15.259 | 10.758 |
| 2 | 0.9436 | 27.718 | 20.871 | 17.181 | 10.046 | 13.323 |
| 2 | 0.9446 | 26.723 | 18.344 | 19.605 | 12.555 | 13.909 |
| 2 | 0.9456 | 24.435 | 22.867 | 22.491 | 8.676  | 10.529 |
| 2 | 0.9466 | 18.720 | 17.063 | 15.423 | 10.078 | 9.457  |



|   |        |        |        |        |        |        |
|---|--------|--------|--------|--------|--------|--------|
| 2 | 0.9476 | 10.776 | 15.151 | 9.020  | 8.729  | 4.954  |
| 2 | 0.9486 | 9.242  | 11.472 | 6.758  | 14.773 | 6.279  |
| 2 | 0.9496 | 10.927 | 8.827  | 10.120 | 14.484 | 11.844 |
| 2 | 0.9506 | 12.617 | 6.922  | 9.294  | 9.179  | 3.405  |
| 2 | 0.9516 | 11.678 | 5.094  | 6.992  | 7.934  | 2.839  |
| 2 | 0.9526 | 20.992 | 10.656 | 14.564 | 13.953 | 8.214  |
| 2 | 0.9536 | 9.831  | 7.278  | 7.988  | 7.113  | 12.257 |
| 2 | 0.9546 | 8.553  | 10.132 | 7.943  | 12.793 | 8.294  |
| 2 | 0.9556 | 15.449 | 10.891 | 8.402  | 22.924 | 16.684 |
| 2 | 0.9566 | 10.661 | 9.132  | 8.794  | 8.822  | 17.379 |
| 2 | 0.9576 | 13.199 | 6.742  | 12.527 | 18.840 | 18.232 |
| 2 | 0.9586 | 17.769 | 5.084  | 14.711 | 10.912 | 12.794 |
| 2 | 0.9596 | 15.824 | 14.418 | 15.553 | 17.332 | 21.807 |
| 2 | 0.9606 | 15.803 | 8.882  | 13.381 | 20.064 | 11.818 |
| 2 | 0.9616 | 21.185 | 10.233 | 16.193 | 9.501  | 12.826 |
| 2 | 0.9626 | 14.740 | 8.475  | 11.554 | 12.235 | 7.327  |
| 2 | 0.9636 | 13.361 | 6.708  | 11.589 | 6.681  | 7.366  |
| 2 | 0.9646 | 5.810  | 6.332  | 7.649  | 13.529 | 17.176 |
| 2 | 0.9656 | 9.353  | 5.569  | 8.131  | 9.481  | 21.255 |
| 2 | 0.9666 | 3.988  | 3.690  | 3.913  | 10.693 | 12.665 |
| 2 | 0.9676 | 10.080 | 1.881  | 3.665  | 17.925 | 12.217 |
| 2 | 0.9686 | 9.194  | 6.751  | 4.982  | 12.069 | 16.615 |
| 2 | 0.9696 | 10.001 | 9.206  | 7.910  | 27.219 | 13.329 |
| 2 | 0.9706 | 7.419  | 7.363  | 7.530  | 15.950 | 8.820  |
| 2 | 0.9716 | 4.248  | 7.807  | 8.268  | 6.000  | 4.118  |
| 2 | 0.9726 | 12.251 | 8.975  | 13.827 | 18.585 | 5.328  |
| 2 | 0.9736 | 14.693 | 10.605 | 12.676 | 17.468 | 25.615 |
| 2 | 0.9746 | 12.694 | 9.928  | 8.779  | 22.933 | 14.745 |
| 2 | 0.9756 | 12.699 | 7.697  | 9.192  | 13.469 | 14.734 |
| 2 | 0.9766 | 15.974 | 9.823  | 12.763 | 13.395 | 14.145 |
| 2 | 0.9776 | 17.298 | 10.058 | 17.588 | 15.991 | 15.070 |
| 2 | 0.9786 | 11.814 | 8.490  | 8.107  | 13.433 | 28.564 |
| 2 | 0.9796 | 9.522  | 9.222  | 8.675  | 14.475 | 8.803  |
| 2 | 0.9806 | 12.761 | 9.596  | 9.289  | 11.684 | 10.088 |
| 2 | 0.9816 | 24.319 | 24.719 | 24.470 | 20.668 | 5.915  |
| 2 | 0.9826 | 24.258 | 24.751 | 24.486 | 20.660 | 5.960  |
| 2 | 0.9836 | 15.372 | 15.463 | 17.500 | 17.505 | 10.088 |
| 2 | 0.9846 | 15.915 | 8.327  | 13.049 | 20.731 | 13.648 |
| 2 | 0.9856 | 12.193 | 11.856 | 14.004 | 20.080 | 8.688  |
| 2 | 0.9866 | 15.869 | 9.105  | 18.575 | 23.815 | 14.168 |
| 2 | 0.9876 | 19.590 | 8.845  | 17.206 | 24.979 | 12.623 |
| 2 | 0.9886 | 12.284 | 13.492 | 9.684  | 29.439 | 18.486 |
| 2 | 0.9896 | 13.986 | 11.295 | 13.167 | 16.049 | 14.185 |
| 2 | 0.9906 | 17.632 | 16.010 | 16.411 | 7.952  | 17.862 |
| 2 | 0.9916 | 18.409 | 14.992 | 15.855 | 25.242 | 27.629 |
| 2 | 0.9926 | 15.820 | 14.062 | 14.772 | 23.312 | 20.877 |
| 2 | 0.9936 | 12.771 | 12.369 | 11.210 | 22.519 | 15.757 |
| 2 | 0.9946 | 20.465 | 14.296 | 22.746 | 16.804 | 25.587 |
| 2 | 0.9956 | 6.819  | 5.656  | 6.737  | 13.663 | 10.762 |
| 2 | 0.9966 | 10.054 | 7.100  | 11.740 | 18.153 | 5.545  |

|   |        |        |        |        |        |        |
|---|--------|--------|--------|--------|--------|--------|
| 2 | 0.9976 | 12.747 | 11.598 | 13.523 | 16.183 | 13.192 |
| 2 | 0.9986 | 10.458 | 11.022 | 8.617  | 18.059 | 21.910 |
| 2 | 0.9996 | 16.917 | 13.042 | 14.914 | 19.438 | 17.887 |
| 2 | 1.0006 | 15.813 | 8.515  | 11.585 | 10.655 | 17.674 |
| 2 | 1.0016 | 14.930 | 13.432 | 9.325  | 13.356 | 19.835 |
| 2 | 1.0026 | 2.294  | 3.360  | 3.605  | 14.724 | 12.064 |
| 2 | 1.0036 | 15.129 | 11.915 | 12.153 | 8.740  | 11.965 |
| 2 | 1.0046 | 15.973 | 13.288 | 14.279 | 13.023 | 18.264 |
| 2 | 1.0056 | 7.855  | 10.422 | 13.309 | 11.782 | 9.410  |
| 2 | 1.0066 | 4.277  | 5.946  | 5.634  | 9.644  | 11.119 |
| 2 | 1.0076 | 5.716  | 4.572  | 6.293  | 10.398 | 13.935 |
| 2 | 1.0086 | 8.249  | 6.777  | 6.378  | 23.456 | 14.152 |
| 2 | 1.0096 | 6.889  | 2.741  | 6.979  | 13.116 | 6.268  |
| 2 | 1.0106 | 10.014 | 3.733  | 5.845  | 15.187 | 15.740 |
| 2 | 1.0116 | 4.546  | 2.405  | 5.595  | 7.014  | 7.048  |
| 2 | 1.0126 | 13.871 | 17.795 | 16.329 | 16.242 | 22.676 |
| 2 | 1.0136 | 14.139 | 14.947 | 17.239 | 12.086 | 13.725 |
| 2 | 1.0146 | 14.656 | 19.612 | 14.970 | 11.974 | 9.987  |
| 2 | 1.0156 | 10.622 | 13.217 | 12.127 | 21.909 | 14.847 |
| 2 | 1.0166 | 8.896  | 9.403  | 17.135 | 19.792 | 16.122 |
| 2 | 1.0176 | 10.190 | 10.725 | 7.514  | 13.008 | 23.210 |
| 2 | 1.0186 | 15.765 | 19.782 | 16.043 | 28.312 | 14.850 |
| 2 | 1.0196 | 14.075 | 7.263  | 10.986 | 17.707 | 17.934 |
| 2 | 1.0206 | 6.492  | 7.206  | 8.697  | 10.660 | 13.397 |
| 2 | 1.0216 | 7.809  | 12.626 | 12.738 | 23.587 | 11.702 |
| 2 | 1.0226 | 17.215 | 13.779 | 18.900 | 12.357 | 12.520 |
| 2 | 1.0236 | 8.269  | 7.162  | 8.028  | 11.914 | 11.419 |
| 2 | 1.0246 | 10.184 | 4.629  | 8.137  | 25.684 | 12.722 |
| 2 | 1.0256 | 10.585 | 7.230  | 8.466  | 17.116 | 14.444 |
| 2 | 1.0266 | 14.898 | 4.791  | 13.576 | 14.215 | 11.801 |
| 2 | 1.0276 | 25.810 | 11.133 | 20.684 | 15.636 | 16.961 |
| 2 | 1.0286 | 25.709 | 10.131 | 20.952 | 21.183 | 16.694 |
| 2 | 1.0296 | 20.621 | 15.889 | 20.774 | 15.344 | 10.260 |
| 2 | 1.0306 | 8.153  | 8.777  | 9.601  | 16.332 | 5.795  |
| 2 | 1.0316 | 6.209  | 9.880  | 10.887 | 22.767 | 5.731  |
| 2 | 1.0326 | 11.207 | 10.313 | 9.449  | 22.340 | 8.218  |
| 2 | 1.0336 | 17.308 | 12.692 | 17.374 | 23.648 | 21.427 |
| 2 | 1.0346 | 9.980  | 12.090 | 10.109 | 24.267 | 12.607 |
| 2 | 1.0356 | 21.948 | 16.232 | 17.670 | 17.120 | 11.461 |
| 2 | 1.0366 | 16.083 | 13.284 | 10.737 | 16.448 | 10.162 |
| 2 | 1.0376 | 16.196 | 9.633  | 12.163 | 15.956 | 17.251 |
| 2 | 1.0386 | 11.576 | 4.123  | 9.910  | 8.255  | 10.097 |
| 2 | 1.0396 | 20.261 | 15.350 | 15.345 | 21.249 | 8.891  |
| 2 | 1.0406 | 12.335 | 14.307 | 10.530 | 37.399 | 16.938 |
| 2 | 1.0416 | 8.912  | 9.431  | 6.454  | 24.023 | 16.374 |
| 2 | 1.0426 | 16.686 | 7.849  | 12.463 | 24.143 | 14.329 |
| 2 | 1.0436 | 15.627 | 9.427  | 16.682 | 17.618 | 12.072 |
| 2 | 1.0446 | 21.260 | 16.581 | 16.206 | 7.109  | 8.381  |
| 2 | 1.0456 | 13.382 | 12.865 | 11.394 | 27.341 | 9.121  |
| 2 | 1.0466 | 16.786 | 12.659 | 19.242 | 27.395 | 8.013  |

|   |        |        |        |        |        |        |
|---|--------|--------|--------|--------|--------|--------|
| 2 | 1.0476 | 11.452 | 10.287 | 9.700  | 17.142 | 17.091 |
| 2 | 1.0486 | 11.217 | 15.293 | 9.669  | 16.232 | 23.059 |
| 2 | 1.0496 | 11.740 | 7.559  | 9.089  | 27.817 | 14.183 |
| 2 | 1.0506 | 14.400 | 16.367 | 16.492 | 13.488 | 8.199  |
| 2 | 1.0516 | 15.845 | 10.489 | 14.627 | 18.193 | 23.407 |
| 2 | 1.0526 | 16.220 | 18.300 | 17.121 | 20.305 | 6.759  |
| 2 | 1.0536 | 18.224 | 17.771 | 15.511 | 17.448 | 12.541 |
| 2 | 1.0546 | 10.845 | 12.126 | 9.435  | 16.531 | 7.759  |
| 2 | 1.0556 | 8.216  | 11.550 | 5.662  | 29.303 | 12.560 |
| 2 | 1.0566 | 8.636  | 10.543 | 6.355  | 9.781  | 7.962  |
| 2 | 1.0576 | 14.189 | 8.530  | 8.816  | 30.907 | 13.774 |
| 2 | 1.0586 | 9.780  | 11.113 | 6.557  | 18.462 | 4.712  |
| 2 | 1.0596 | 9.033  | 10.526 | 5.582  | 21.160 | 5.048  |
| 2 | 1.0606 | 8.402  | 11.822 | 7.242  | 28.288 | 12.049 |
| 2 | 1.0616 | 15.065 | 13.094 | 11.136 | 16.166 | 11.980 |
| 2 | 1.0626 | 11.822 | 14.066 | 10.763 | 20.041 | 5.877  |
| 2 | 1.0636 | 9.152  | 17.216 | 5.994  | 21.296 | 4.835  |
| 2 | 1.0646 | 7.078  | 6.520  | 6.760  | 5.063  | 3.904  |
| 2 | 1.0656 | 12.699 | 14.308 | 10.682 | 11.852 | 9.119  |
| 2 | 1.0666 | 16.737 | 11.173 | 11.203 | 24.241 | 12.901 |
| 2 | 1.0676 | 13.079 | 13.669 | 15.315 | 18.978 | 7.230  |
| 2 | 1.0686 | 8.433  | 13.424 | 8.574  | 19.034 | 12.875 |
| 2 | 1.0696 | 11.744 | 10.734 | 7.721  | 24.797 | 10.383 |
| 2 | 1.0706 | 11.612 | 13.353 | 7.389  | 25.281 | 25.701 |
| 2 | 1.0716 | 10.234 | 7.724  | 10.836 | 28.473 | 20.008 |
| 2 | 1.0726 | 18.396 | 17.905 | 17.233 | 21.953 | 17.897 |
| 2 | 1.0736 | 10.690 | 11.496 | 12.686 | 21.572 | 8.939  |
| 2 | 1.0746 | 17.886 | 18.808 | 22.039 | 25.604 | 9.950  |
| 2 | 1.0756 | 12.754 | 12.321 | 13.205 | 9.555  | 14.392 |
| 2 | 1.0766 | 8.473  | 9.994  | 6.574  | 11.262 | 4.880  |
| 2 | 1.0776 | 9.548  | 11.243 | 9.782  | 2.997  | 3.629  |
| 2 | 1.0786 | 11.973 | 8.608  | 11.712 | 12.492 | 8.796  |
| 2 | 1.0796 | 19.215 | 15.463 | 15.428 | 8.849  | 18.947 |
| 2 | 1.0806 | 19.953 | 14.881 | 17.817 | 12.699 | 4.559  |
| 2 | 1.0816 | 14.703 | 10.523 | 13.415 | 13.578 | 18.889 |
| 2 | 1.0826 | 19.299 | 12.663 | 16.526 | 11.419 | 23.803 |
| 2 | 1.0836 | 10.492 | 9.654  | 11.817 | 7.673  | 4.920  |
| 2 | 1.0846 | 8.216  | 7.323  | 9.969  | 3.911  | 3.376  |
| 2 | 1.0856 | 5.025  | 5.500  | 5.571  | 2.623  | 0.315  |
| 2 | 1.0866 | 19.929 | 12.165 | 19.802 | 2.628  | 9.665  |
| 2 | 1.0876 | 12.589 | 10.494 | 11.046 | 6.599  | 25.774 |
| 2 | 1.0886 | 18.320 | 18.135 | 15.293 | 23.258 | 24.535 |
| 2 | 1.0896 | 18.225 | 15.601 | 19.512 | 22.163 | 11.537 |
| 2 | 1.0906 | 16.776 | 12.169 | 15.100 | 21.019 | 7.099  |
| 2 | 1.0916 | 20.470 | 14.620 | 19.278 | 15.072 | 10.069 |
| 2 | 1.0926 | 16.539 | 11.706 | 15.991 | 30.239 | 27.003 |
| 2 | 1.0936 | 27.172 | 13.156 | 24.483 | 22.923 | 11.090 |
| 2 | 1.0946 | 13.625 | 8.361  | 15.699 | 20.570 | 6.889  |
| 2 | 1.0956 | 12.266 | 8.614  | 16.723 | 15.293 | 8.192  |
| 2 | 1.0966 | 14.971 | 7.845  | 15.582 | 16.894 | 6.303  |

|   |        |        |        |        |        |        |
|---|--------|--------|--------|--------|--------|--------|
| 2 | 1.0976 | 17.893 | 12.892 | 20.336 | 6.290  | 7.610  |
| 2 | 1.0986 | 16.419 | 16.804 | 16.738 | 20.597 | 9.383  |
| 2 | 1.0996 | 8.856  | 10.409 | 10.367 | 10.416 | 4.244  |
| 2 | 1.1006 | 17.888 | 14.022 | 18.004 | 13.704 | 5.931  |
| 2 | 1.1016 | 22.809 | 12.021 | 20.127 | 24.179 | 14.553 |
| 2 | 1.1026 | 20.812 | 15.059 | 20.034 | 21.955 | 26.170 |
| 2 | 1.1036 | 11.583 | 12.709 | 12.961 | 11.703 | 19.854 |
| 2 | 1.1046 | 16.806 | 16.337 | 16.871 | 11.991 | 14.549 |
| 2 | 1.1056 | 11.250 | 11.563 | 13.377 | 20.157 | 21.500 |
| 2 | 1.1066 | 12.779 | 11.771 | 13.711 | 27.037 | 22.667 |
| 2 | 1.1076 | 18.799 | 14.502 | 18.420 | 13.886 | 17.093 |
| 2 | 1.1086 | 21.942 | 19.202 | 18.768 | 13.935 | 27.342 |
| 2 | 1.1096 | 20.603 | 20.257 | 19.396 | 22.568 | 9.880  |
| 2 | 1.1106 | 28.065 | 26.569 | 29.343 | 18.164 | 7.887  |
| 2 | 1.1116 | 24.696 | 25.237 | 20.301 | 22.184 | 14.779 |
| 2 | 1.1126 | 24.856 | 22.055 | 23.345 | 14.210 | 12.111 |
| 2 | 1.1136 | 22.246 | 18.418 | 18.311 | 17.902 | 10.861 |
| 2 | 1.1146 | 21.902 | 15.865 | 14.725 | 12.480 | 11.382 |
| 2 | 1.1156 | 18.937 | 11.747 | 14.001 | 9.448  | 12.915 |
| 2 | 1.1166 | 13.310 | 13.118 | 11.385 | 10.530 | 8.571  |
| 2 | 1.1176 | 11.473 | 14.157 | 12.558 | 9.926  | 6.841  |
| 2 | 1.1186 | 15.232 | 20.536 | 15.261 | 14.322 | 13.940 |
| 2 | 1.1196 | 5.487  | 6.725  | 7.429  | 6.176  | 7.165  |
| 2 | 1.1206 | 5.348  | 5.268  | 6.218  | 7.675  | 4.444  |
| 2 | 1.1216 | 7.294  | 10.240 | 9.339  | 10.234 | 7.249  |
| 2 | 1.1226 | 12.626 | 14.142 | 13.530 | 11.151 | 16.806 |
| 2 | 1.1236 | 16.307 | 19.559 | 16.194 | 26.723 | 12.633 |
| 2 | 1.1246 | 14.781 | 17.755 | 17.174 | 6.570  | 13.001 |
| 2 | 1.1256 | 11.988 | 18.788 | 14.752 | 26.215 | 13.188 |
| 2 | 1.1266 | 14.149 | 12.415 | 10.927 | 17.932 | 17.974 |
| 2 | 1.1276 | 15.010 | 14.985 | 9.745  | 21.004 | 16.222 |
| 2 | 1.1286 | 17.330 | 12.861 | 15.532 | 18.278 | 9.749  |
| 2 | 1.1296 | 12.522 | 11.894 | 8.922  | 10.998 | 19.507 |
| 2 | 1.1306 | 10.439 | 10.419 | 8.213  | 9.278  | 8.147  |
| 2 | 1.1316 | 5.718  | 9.584  | 6.456  | 7.895  | 8.297  |
| 2 | 1.1326 | 12.956 | 22.395 | 17.165 | 18.783 | 20.004 |
| 2 | 1.1336 | 23.440 | 18.529 | 27.411 | 14.303 | 18.210 |
| 2 | 1.1346 | 16.038 | 10.962 | 11.927 | 11.024 | 13.373 |
| 2 | 1.1356 | 10.420 | 12.020 | 9.896  | 9.854  | 7.549  |
| 2 | 1.1366 | 21.875 | 21.299 | 18.961 | 19.087 | 13.852 |
| 2 | 1.1376 | 16.564 | 17.124 | 12.954 | 9.435  | 8.464  |
| 2 | 1.1386 | 16.484 | 15.664 | 10.094 | 14.433 | 13.816 |
| 2 | 1.1396 | 23.874 | 18.334 | 14.863 | 7.416  | 12.654 |
| 2 | 1.1406 | 15.854 | 12.247 | 9.947  | 10.475 | 24.489 |
| 2 | 1.1416 | 28.379 | 29.219 | 22.711 | 10.638 | 16.034 |
| 2 | 1.1426 | 23.769 | 16.330 | 16.702 | 10.917 | 7.221  |
| 2 | 1.1436 | 21.785 | 14.770 | 14.501 | 15.916 | 12.261 |
| 2 | 1.1446 | 27.577 | 32.086 | 24.645 | 13.392 | 10.291 |
| 2 | 1.1456 | 25.378 | 14.865 | 20.225 | 15.232 | 10.881 |
| 2 | 1.1466 | 25.390 | 14.864 | 20.251 | 15.243 | 10.873 |

|   |        |        |        |        |        |        |
|---|--------|--------|--------|--------|--------|--------|
| 2 | 1.1476 | 18.381 | 11.374 | 14.172 | 16.663 | 11.116 |
| 2 | 1.1486 | 28.124 | 18.446 | 21.535 | 15.710 | 12.138 |
| 2 | 1.1496 | 17.646 | 15.601 | 14.551 | 24.361 | 7.276  |
| 2 | 1.1506 | 21.296 | 18.760 | 16.735 | 6.742  | 3.810  |
| 2 | 1.1516 | 21.839 | 20.059 | 17.145 | 4.848  | 2.506  |
| 2 | 1.1526 | 25.181 | 24.051 | 19.736 | 9.975  | 16.951 |
| 2 | 1.1536 | 25.129 | 24.265 | 19.711 | 9.751  | 17.003 |
| 2 | 1.1546 | 12.329 | 8.573  | 6.763  | 11.684 | 8.391  |
| 2 | 1.1556 | 18.817 | 13.670 | 16.792 | 5.396  | 6.374  |
| 2 | 1.1566 | 20.573 | 11.024 | 15.947 | 20.600 | 10.875 |
| 2 | 1.1576 | 27.086 | 14.583 | 22.111 | 19.110 | 10.015 |
| 2 | 1.1586 | 24.029 | 20.096 | 22.441 | 12.518 | 8.319  |
| 2 | 1.1596 | 17.679 | 17.438 | 13.442 | 11.027 | 13.484 |
| 2 | 1.1606 | 27.823 | 22.366 | 22.578 | 16.602 | 8.841  |
| 2 | 1.1616 | 23.538 | 25.240 | 21.994 | 17.297 | 20.378 |
| 2 | 1.1626 | 22.150 | 18.937 | 23.112 | 10.906 | 11.095 |
| 2 | 1.1636 | 15.900 | 14.097 | 15.777 | 7.671  | 9.720  |
| 2 | 1.1646 | 20.784 | 16.698 | 16.879 | 9.008  | 12.821 |
| 2 | 1.1656 | 24.177 | 21.052 | 19.505 | 28.849 | 16.958 |
| 2 | 1.1666 | 24.353 | 17.782 | 22.440 | 22.125 | 12.476 |
| 2 | 1.1676 | 19.790 | 7.836  | 16.006 | 20.657 | 12.877 |
| 2 | 1.1686 | 22.706 | 9.868  | 14.908 | 11.272 | 13.027 |
| 2 | 1.1696 | 23.220 | 18.242 | 18.356 | 20.267 | 9.982  |
| 2 | 1.1706 | 17.099 | 13.865 | 9.831  | 13.824 | 8.322  |
| 2 | 1.1716 | 10.941 | 12.092 | 9.031  | 14.219 | 7.002  |
| 2 | 1.1726 | 6.532  | 3.074  | 6.784  | 11.158 | 11.256 |
| 2 | 1.1736 | 11.976 | 17.487 | 10.131 | 9.571  | 3.957  |
| 2 | 1.1746 | 15.003 | 21.290 | 12.775 | 12.958 | 7.950  |
| 2 | 1.1756 | 17.430 | 17.493 | 12.538 | 18.001 | 14.098 |
| 2 | 1.1766 | 32.688 | 32.548 | 27.281 | 25.967 | 22.164 |
| 2 | 1.1776 | 36.438 | 32.984 | 26.474 | 23.315 | 13.383 |
| 2 | 1.1786 | 28.722 | 13.652 | 24.120 | 12.249 | 12.180 |
| 2 | 1.1796 | 9.885  | 8.152  | 9.193  | 10.232 | 6.939  |
| 2 | 1.1806 | 17.494 | 16.662 | 13.039 | 6.883  | 9.838  |
| 2 | 1.1816 | 16.384 | 10.270 | 13.376 | 9.617  | 7.881  |
| 2 | 1.1826 | 15.641 | 16.414 | 14.178 | 4.051  | 3.399  |
| 2 | 1.1836 | 2.841  | 5.922  | 3.251  | 5.641  | 2.934  |
| 2 | 1.1846 | 13.242 | 14.418 | 10.745 | 10.094 | 13.035 |
| 2 | 1.1856 | 22.068 | 16.957 | 12.805 | 7.438  | 25.925 |
| 2 | 1.1866 | 31.007 | 15.208 | 19.110 | 17.928 | 18.126 |
| 2 | 1.1876 | 34.897 | 19.010 | 25.950 | 31.054 | 21.067 |
| 2 | 1.1886 | 20.518 | 15.711 | 17.014 | 15.864 | 16.155 |
| 2 | 1.1896 | 25.088 | 7.959  | 15.938 | 21.756 | 18.369 |
| 2 | 1.1906 | 34.959 | 29.796 | 31.504 | 14.698 | 21.726 |
| 2 | 1.1916 | 34.958 | 29.796 | 31.504 | 14.698 | 21.726 |
| 2 | 1.1926 | 11.528 | 10.190 | 8.587  | 7.054  | 7.781  |
| 2 | 1.1936 | 16.337 | 7.375  | 11.145 | 13.709 | 15.572 |
| 2 | 1.1946 | 19.115 | 15.421 | 15.715 | 5.924  | 16.615 |
| 2 | 1.1956 | 20.737 | 17.006 | 18.792 | 8.041  | 9.876  |
| 2 | 1.1966 | 30.485 | 15.701 | 20.848 | 7.415  | 17.597 |

|   |        |        |        |        |        |        |
|---|--------|--------|--------|--------|--------|--------|
| 2 | 1.1976 | 38.439 | 29.511 | 23.967 | 15.655 | 21.623 |
| 2 | 1.1986 | 13.306 | 8.785  | 4.855  | 7.245  | 17.373 |
| 2 | 1.1996 | 24.611 | 22.980 | 17.283 | 13.367 | 20.834 |
| 2 | 1.2006 | 29.540 | 23.643 | 21.112 | 11.311 | 20.725 |
| 2 | 1.2016 | 14.023 | 14.525 | 9.511  | 6.260  | 5.448  |
| 2 | 1.2026 | 12.664 | 9.630  | 7.406  | 12.099 | 10.459 |
| 2 | 1.2036 | 9.031  | 13.249 | 8.570  | 16.850 | 19.958 |
| 2 | 1.2046 | 9.142  | 9.966  | 6.388  | 4.977  | 14.483 |
| 2 | 1.2056 | 12.732 | 13.054 | 8.708  | 13.195 | 13.822 |
| 2 | 1.2066 | 17.469 | 15.870 | 11.353 | 18.496 | 19.084 |
| 2 | 1.2076 | 17.461 | 15.904 | 11.353 | 18.512 | 19.209 |
| 2 | 1.2086 | 23.550 | 16.099 | 12.786 | 18.831 | 26.575 |
| 2 | 1.2096 | 15.475 | 11.344 | 8.771  | 20.812 | 23.191 |
| 2 | 1.2106 | 13.001 | 7.798  | 8.003  | 20.761 | 17.087 |
| 2 | 1.2116 | 17.934 | 18.648 | 16.392 | 13.263 | 16.436 |
| 2 | 1.2126 | 12.884 | 11.597 | 12.718 | 12.699 | 26.235 |
| 2 | 1.2136 | 15.374 | 16.083 | 14.652 | 12.132 | 22.118 |
| 2 | 1.2146 | 22.656 | 14.500 | 13.749 | 14.116 | 19.921 |
| 2 | 1.2156 | 18.886 | 16.097 | 14.884 | 13.878 | 14.956 |
| 2 | 1.2166 | 22.582 | 14.500 | 19.293 | 9.005  | 18.703 |
| 2 | 1.2176 | 11.388 | 9.846  | 11.458 | 5.172  | 1.689  |
| 2 | 1.2186 | 32.693 | 19.880 | 22.710 | 14.683 | 15.003 |
| 2 | 1.2196 | 29.163 | 22.880 | 27.440 | 24.580 | 12.420 |
| 2 | 1.2206 | 21.211 | 16.721 | 18.350 | 18.071 | 21.749 |
| 2 | 1.2216 | 18.075 | 16.931 | 19.962 | 12.027 | 18.595 |
| 2 | 1.2226 | 17.836 | 16.695 | 19.729 | 12.131 | 18.582 |
| 2 | 1.2236 | 23.957 | 15.205 | 16.704 | 22.708 | 23.830 |
| 2 | 1.2246 | 35.671 | 21.125 | 26.771 | 13.276 | 16.017 |
| 2 | 1.2256 | 22.463 | 19.823 | 15.287 | 15.457 | 22.220 |
| 2 | 1.2266 | 21.181 | 13.730 | 18.844 | 5.587  | 12.138 |
| 2 | 1.2276 | 23.322 | 17.685 | 20.657 | 4.304  | 24.433 |
| 2 | 1.2286 | 13.730 | 11.109 | 7.322  | 6.455  | 14.146 |
| 2 | 1.2296 | 15.514 | 16.346 | 12.573 | 13.092 | 15.506 |
| 2 | 1.2306 | 31.655 | 13.494 | 15.339 | 3.741  | 17.957 |
| 2 | 1.2316 | 29.785 | 20.653 | 16.825 | 15.724 | 20.755 |
| 2 | 1.2326 | 19.321 | 22.419 | 22.137 | 12.408 | 14.922 |
| 2 | 1.2336 | 17.738 | 14.157 | 18.154 | 4.571  | 16.137 |
| 2 | 1.2346 | 19.481 | 15.281 | 18.312 | 8.774  | 10.569 |
| 2 | 1.2356 | 17.983 | 9.958  | 15.074 | 13.866 | 16.060 |
| 2 | 1.2366 | 5.955  | 5.574  | 7.995  | 12.866 | 9.042  |
| 2 | 1.2376 | 23.879 | 15.945 | 15.789 | 18.800 | 23.235 |
| 2 | 1.2386 | 28.491 | 15.702 | 20.869 | 12.015 | 15.126 |
| 2 | 1.2396 | 35.791 | 23.749 | 30.430 | 23.579 | 30.004 |
| 2 | 1.2406 | 27.294 | 22.103 | 25.001 | 17.824 | 26.036 |
| 2 | 1.2416 | 44.954 | 22.278 | 33.366 | 12.681 | 20.776 |
| 2 | 1.2426 | 32.450 | 26.483 | 27.860 | 18.471 | 22.444 |
| 2 | 1.2436 | 34.748 | 20.899 | 28.176 | 18.678 | 17.089 |
| 2 | 1.2446 | 17.848 | 13.164 | 15.303 | 11.926 | 11.270 |
| 2 | 1.2456 | 31.806 | 15.603 | 22.781 | 15.255 | 13.360 |
| 2 | 1.2466 | 35.123 | 21.568 | 23.042 | 15.105 | 18.334 |

|   |        |        |        |        |        |        |
|---|--------|--------|--------|--------|--------|--------|
| 2 | 1.2476 | 12.587 | 11.795 | 14.015 | 13.585 | 21.787 |
| 2 | 1.2486 | 15.646 | 11.969 | 10.985 | 21.200 | 20.215 |
| 2 | 1.2496 | 8.274  | 13.231 | 11.581 | 17.446 | 13.059 |
| 2 | 1.2506 | 10.675 | 15.436 | 13.971 | 8.222  | 16.119 |
| 2 | 1.2516 | 12.148 | 17.286 | 20.570 | 12.285 | 19.922 |
| 2 | 1.2526 | 16.941 | 15.591 | 21.353 | 11.824 | 21.701 |
| 2 | 1.2536 | 14.428 | 12.587 | 17.024 | 8.898  | 24.350 |
| 2 | 1.2546 | 17.573 | 21.216 | 21.144 | 19.676 | 13.018 |
| 2 | 1.2556 | 20.581 | 23.968 | 20.636 | 22.120 | 18.490 |
| 2 | 1.2566 | 12.801 | 11.680 | 17.887 | 6.589  | 9.784  |
| 2 | 1.2576 | 12.393 | 12.140 | 18.348 | 20.915 | 18.720 |
| 2 | 1.2586 | 16.794 | 12.462 | 20.465 | 11.746 | 10.512 |
| 2 | 1.2596 | 14.412 | 13.025 | 14.711 | 9.880  | 19.191 |
| 2 | 1.2606 | 37.309 | 23.291 | 32.370 | 20.452 | 28.096 |
| 2 | 1.2616 | 25.013 | 17.152 | 20.277 | 16.268 | 30.861 |
| 2 | 1.2626 | 27.435 | 14.278 | 23.352 | 9.192  | 19.620 |
| 2 | 1.2636 | 26.883 | 24.998 | 21.413 | 13.072 | 17.318 |
| 2 | 1.2646 | 18.009 | 21.773 | 22.001 | 15.526 | 14.243 |
| 2 | 1.2656 | 13.113 | 15.999 | 22.884 | 19.624 | 14.858 |
| 2 | 1.2666 | 18.822 | 22.132 | 26.627 | 20.142 | 19.644 |
| 2 | 1.2676 | 17.944 | 17.467 | 23.362 | 23.812 | 28.345 |
| 2 | 1.2686 | 18.327 | 13.696 | 19.305 | 16.059 | 20.680 |
| 2 | 1.2696 | 10.672 | 9.010  | 10.701 | 20.461 | 27.923 |
| 2 | 1.2706 | 15.486 | 14.095 | 11.762 | 12.077 | 21.235 |
| 2 | 1.2716 | 11.645 | 8.821  | 13.819 | 16.642 | 21.172 |
| 2 | 1.2726 | 14.609 | 14.418 | 18.047 | 5.447  | 11.532 |
| 2 | 1.2736 | 15.689 | 13.175 | 15.995 | 10.149 | 19.635 |
| 2 | 1.2746 | 22.032 | 11.971 | 17.957 | 10.230 | 11.085 |
| 2 | 1.2756 | 7.947  | 13.492 | 12.570 | 16.393 | 17.087 |
| 2 | 1.2766 | 9.253  | 13.079 | 13.213 | 23.317 | 23.853 |
| 2 | 1.2776 | 5.999  | 9.000  | 13.009 | 15.560 | 26.368 |
| 2 | 1.2786 | 12.502 | 12.273 | 11.932 | 17.096 | 18.636 |
| 2 | 1.2796 | 14.190 | 13.139 | 18.435 | 31.449 | 15.259 |
| 2 | 1.2806 | 14.204 | 11.126 | 19.053 | 5.350  | 8.696  |
| 2 | 1.2816 | 10.188 | 7.636  | 16.462 | 9.044  | 9.370  |
| 2 | 1.2826 | 27.164 | 20.630 | 23.428 | 10.345 | 23.340 |
| 2 | 1.2836 | 24.352 | 17.811 | 21.784 | 19.165 | 23.364 |
| 2 | 1.2846 | 20.244 | 23.862 | 21.109 | 14.978 | 27.780 |
| 2 | 1.2856 | 15.403 | 12.731 | 17.836 | 10.839 | 20.448 |
| 2 | 1.2866 | 9.479  | 8.758  | 11.646 | 8.535  | 26.655 |
| 2 | 1.2876 | 9.200  | 6.817  | 10.878 | 15.173 | 31.349 |
| 2 | 1.2886 | 9.505  | 8.874  | 14.617 | 4.281  | 14.458 |
| 2 | 1.2896 | 12.216 | 7.409  | 12.526 | 9.995  | 18.496 |
| 2 | 1.2906 | 11.437 | 3.846  | 8.348  | 7.957  | 16.566 |
| 2 | 1.2916 | 16.562 | 10.213 | 20.338 | 7.190  | 17.174 |
| 2 | 1.2926 | 14.198 | 11.010 | 16.217 | 13.001 | 16.780 |
| 2 | 1.2936 | 6.998  | 7.783  | 13.373 | 7.040  | 11.046 |
| 2 | 1.2946 | 15.878 | 13.044 | 15.480 | 12.290 | 25.275 |
| 2 | 1.2956 | 10.522 | 11.660 | 16.487 | 16.133 | 22.362 |
| 2 | 1.2966 | 13.255 | 12.931 | 16.175 | 10.440 | 7.699  |

|   |        |        |        |        |        |        |
|---|--------|--------|--------|--------|--------|--------|
| 2 | 1.2976 | 13.718 | 14.211 | 21.295 | 14.922 | 15.132 |
| 2 | 1.2986 | 26.608 | 12.334 | 27.186 | 15.175 | 21.047 |
| 2 | 1.2996 | 22.769 | 12.806 | 24.463 | 27.166 | 34.498 |
| 2 | 1.3006 | 16.541 | 6.721  | 13.783 | 14.538 | 15.659 |
| 2 | 1.3016 | 18.530 | 14.970 | 24.872 | 17.577 | 10.094 |
| 2 | 1.3026 | 22.008 | 22.668 | 30.353 | 9.374  | 17.495 |
| 2 | 1.3036 | 17.210 | 16.875 | 23.594 | 14.737 | 15.034 |
| 2 | 1.3046 | 29.692 | 18.031 | 23.106 | 12.077 | 16.712 |
| 2 | 1.3056 | 11.155 | 9.583  | 18.354 | 6.881  | 21.809 |
| 2 | 1.3066 | 24.851 | 19.245 | 19.717 | 11.986 | 26.585 |
| 2 | 1.3076 | 24.800 | 26.372 | 24.684 | 22.026 | 32.923 |
| 2 | 1.3086 | 17.358 | 17.869 | 17.523 | 15.778 | 14.579 |
| 2 | 1.3096 | 9.367  | 6.941  | 9.113  | 14.930 | 20.555 |
| 2 | 1.3106 | 17.776 | 11.007 | 16.036 | 22.359 | 22.932 |
| 2 | 1.3116 | 11.278 | 12.018 | 9.184  | 11.415 | 23.706 |
| 2 | 1.3126 | 32.965 | 14.545 | 15.275 | 7.330  | 22.121 |
| 2 | 1.3136 | 14.399 | 20.501 | 13.996 | 18.583 | 27.750 |
| 2 | 1.3146 | 16.169 | 24.693 | 21.273 | 31.208 | 33.488 |
| 2 | 1.3156 | 11.915 | 5.976  | 13.202 | 28.540 | 21.463 |
| 2 | 1.3166 | 6.159  | 4.281  | 5.998  | 10.088 | 16.232 |
| 2 | 1.3176 | 14.552 | 11.390 | 16.984 | 13.056 | 17.541 |
| 2 | 1.3186 | 26.557 | 12.095 | 19.956 | 18.226 | 30.161 |
| 2 | 1.3196 | 23.212 | 7.863  | 14.451 | 24.579 | 24.377 |
| 2 | 1.3206 | 22.994 | 7.818  | 14.065 | 24.274 | 24.488 |
| 2 | 1.3216 | 16.952 | 10.099 | 13.198 | 15.698 | 24.340 |
| 2 | 1.3226 | 12.994 | 9.042  | 11.023 | 12.610 | 18.833 |
| 2 | 1.3236 | 15.605 | 11.630 | 18.066 | 12.611 | 15.410 |
| 2 | 1.3246 | 18.360 | 5.338  | 12.147 | 15.197 | 12.908 |
| 2 | 1.3256 | 9.615  | 5.687  | 8.324  | 12.519 | 26.347 |
| 2 | 1.3266 | 6.315  | 2.944  | 4.129  | 2.743  | 9.197  |
| 2 | 1.3276 | 9.353  | 11.292 | 12.880 | 2.914  | 6.170  |
| 2 | 1.3286 | 17.462 | 9.451  | 17.130 | 7.957  | 24.806 |
| 2 | 1.3296 | 14.451 | 13.116 | 19.813 | 7.746  | 25.734 |
| 2 | 1.3306 | 26.741 | 19.607 | 29.417 | 11.768 | 16.491 |
| 2 | 1.3316 | 20.098 | 13.088 | 24.249 | 15.232 | 22.522 |
| 2 | 1.3326 | 9.922  | 11.567 | 13.719 | 9.966  | 13.597 |
| 2 | 1.3336 | 16.458 | 11.642 | 16.408 | 14.910 | 23.493 |
| 2 | 1.3346 | 20.323 | 18.821 | 14.717 | 14.967 | 21.665 |
| 2 | 1.3356 | 24.930 | 20.740 | 18.968 | 9.092  | 16.152 |
| 2 | 1.3366 | 19.839 | 11.768 | 16.446 | 17.702 | 17.139 |
| 2 | 1.3376 | 19.466 | 21.206 | 19.632 | 18.701 | 18.769 |
| 2 | 1.3386 | 23.787 | 20.874 | 21.388 | 13.531 | 22.759 |
| 2 | 1.3396 | 12.491 | 16.338 | 17.630 | 8.506  | 13.775 |
| 2 | 1.3406 | 17.717 | 20.902 | 23.031 | 6.578  | 11.248 |
| 2 | 1.3416 | 11.322 | 11.685 | 18.324 | 7.018  | 15.954 |
| 2 | 1.3426 | 8.742  | 16.761 | 13.660 | 10.374 | 13.665 |
| 2 | 1.3436 | 8.736  | 16.667 | 13.675 | 10.166 | 13.644 |
| 2 | 1.3446 | 5.579  | 11.233 | 9.330  | 13.136 | 14.914 |
| 2 | 1.3456 | 9.696  | 11.083 | 11.642 | 7.427  | 16.341 |
| 2 | 1.3466 | 9.008  | 12.437 | 10.194 | 7.968  | 14.468 |



|   |        |        |        |        |        |        |
|---|--------|--------|--------|--------|--------|--------|
| 2 | 1.3476 | 10.136 | 11.335 | 11.084 | 7.881  | 17.112 |
| 2 | 1.3486 | 13.050 | 10.397 | 15.177 | 14.186 | 19.741 |
| 2 | 1.3496 | 9.668  | 4.831  | 6.672  | 16.334 | 21.099 |
| 2 | 1.3506 | 9.648  | 4.829  | 6.649  | 16.333 | 21.102 |
| 2 | 1.3516 | 11.829 | 12.504 | 14.048 | 15.868 | 26.221 |
| 2 | 1.3526 | 10.217 | 9.085  | 14.655 | 12.689 | 23.062 |
| 2 | 1.3536 | 17.325 | 14.619 | 23.719 | 15.847 | 32.671 |
| 3 | 0.0007 | 0.000  | 0.000  | 0.000  | 0.000  | 0.000  |
| 3 | 0.0017 | 13.373 | 7.361  | 9.464  | 11.913 | 22.983 |
| 3 | 0.0027 | 17.074 | 13.047 | 13.569 | 14.453 | 19.961 |
| 3 | 0.0037 | 10.468 | 13.685 | 12.540 | 8.290  | 20.502 |
| 3 | 0.0047 | 14.976 | 11.958 | 10.368 | 21.040 | 23.669 |
| 3 | 0.0057 | 15.091 | 18.655 | 15.773 | 23.629 | 22.690 |
| 3 | 0.0067 | 8.780  | 14.163 | 14.765 | 17.536 | 16.009 |
| 3 | 0.0077 | 16.795 | 17.298 | 19.023 | 10.671 | 23.792 |
| 3 | 0.0087 | 11.177 | 14.183 | 16.684 | 12.181 | 19.217 |
| 3 | 0.0097 | 21.501 | 23.144 | 18.506 | 14.874 | 22.061 |
| 3 | 0.0107 | 14.396 | 13.089 | 17.994 | 15.706 | 11.734 |
| 3 | 0.0117 | 11.789 | 6.144  | 10.744 | 7.087  | 14.010 |
| 3 | 0.0127 | 8.193  | 12.859 | 12.308 | 9.663  | 12.941 |
| 3 | 0.0137 | 8.790  | 10.341 | 13.413 | 12.943 | 19.537 |
| 3 | 0.0147 | 7.351  | 14.303 | 10.349 | 20.909 | 12.292 |
| 3 | 0.0157 | 14.045 | 17.121 | 10.952 | 19.368 | 13.425 |
| 3 | 0.0167 | 12.797 | 11.598 | 14.707 | 9.088  | 13.636 |
| 3 | 0.0177 | 10.695 | 9.374  | 12.508 | 12.896 | 16.874 |
| 3 | 0.0187 | 13.119 | 16.328 | 20.148 | 10.714 | 17.714 |
| 3 | 0.0197 | 11.267 | 6.902  | 12.780 | 5.675  | 17.764 |
| 3 | 0.0207 | 11.430 | 11.568 | 11.847 | 10.496 | 7.152  |
| 3 | 0.0217 | 9.589  | 20.625 | 14.470 | 16.095 | 12.924 |
| 3 | 0.0227 | 12.937 | 17.643 | 12.935 | 16.607 | 16.582 |
| 3 | 0.0237 | 12.135 | 18.329 | 13.084 | 12.024 | 20.701 |
| 3 | 0.0247 | 16.200 | 19.156 | 18.645 | 14.485 | 18.502 |
| 3 | 0.0257 | 15.700 | 18.750 | 19.816 | 15.812 | 11.378 |
| 3 | 0.0267 | 13.176 | 16.766 | 15.707 | 13.133 | 24.694 |
| 3 | 0.0277 | 14.253 | 10.941 | 18.588 | 7.982  | 15.880 |
| 3 | 0.0287 | 12.319 | 6.287  | 11.514 | 4.374  | 19.024 |
| 3 | 0.0297 | 10.761 | 13.920 | 11.385 | 18.920 | 13.304 |
| 3 | 0.0307 | 13.604 | 16.094 | 17.465 | 16.159 | 21.776 |
| 3 | 0.0317 | 15.400 | 12.597 | 16.380 | 11.889 | 18.074 |
| 3 | 0.0327 | 15.515 | 12.369 | 16.328 | 11.688 | 17.745 |
| 3 | 0.0337 | 11.343 | 7.645  | 5.483  | 13.321 | 15.280 |
| 3 | 0.0347 | 12.035 | 16.707 | 15.625 | 25.216 | 13.581 |
| 3 | 0.0357 | 13.374 | 12.656 | 11.269 | 16.843 | 13.100 |
| 3 | 0.0367 | 14.191 | 25.467 | 17.303 | 20.687 | 11.865 |
| 3 | 0.0377 | 20.199 | 26.496 | 26.032 | 14.239 | 11.059 |
| 3 | 0.0387 | 16.753 | 23.566 | 23.433 | 16.665 | 13.727 |
| 3 | 0.0397 | 6.777  | 10.268 | 10.243 | 17.062 | 7.275  |
| 3 | 0.0407 | 11.279 | 15.520 | 12.359 | 16.797 | 8.892  |
| 3 | 0.0417 | 13.153 | 18.993 | 16.316 | 13.522 | 6.771  |
| 3 | 0.0427 | 20.071 | 26.169 | 15.959 | 11.690 | 15.202 |

|   |        |        |        |        |        |        |
|---|--------|--------|--------|--------|--------|--------|
| 3 | 0.0437 | 13.454 | 18.049 | 16.448 | 11.748 | 9.092  |
| 3 | 0.0447 | 20.201 | 27.352 | 25.970 | 15.528 | 16.742 |
| 3 | 0.0457 | 12.507 | 11.399 | 10.894 | 10.783 | 14.002 |
| 3 | 0.0467 | 17.544 | 16.941 | 17.616 | 14.914 | 19.202 |
| 3 | 0.0477 | 14.990 | 15.887 | 19.518 | 25.272 | 18.650 |
| 3 | 0.0487 | 17.292 | 14.896 | 19.069 | 17.942 | 8.745  |
| 3 | 0.0497 | 9.895  | 7.818  | 7.767  | 20.627 | 5.279  |
| 3 | 0.0507 | 9.695  | 5.833  | 7.477  | 10.570 | 8.970  |
| 3 | 0.0517 | 10.991 | 6.810  | 8.486  | 11.740 | 11.952 |
| 3 | 0.0527 | 15.972 | 15.391 | 10.057 | 15.519 | 15.106 |
| 3 | 0.0537 | 18.205 | 26.379 | 15.205 | 23.311 | 12.996 |
| 3 | 0.0547 | 13.580 | 15.943 | 11.953 | 14.761 | 7.814  |
| 3 | 0.0557 | 33.424 | 16.353 | 20.981 | 12.463 | 10.385 |
| 3 | 0.0567 | 33.497 | 16.439 | 21.036 | 12.466 | 10.479 |
| 3 | 0.0577 | 25.124 | 22.459 | 22.636 | 17.344 | 12.924 |
| 3 | 0.0587 | 15.854 | 10.382 | 12.477 | 11.802 | 15.183 |
| 3 | 0.0597 | 15.609 | 18.059 | 12.888 | 30.117 | 15.026 |
| 3 | 0.0607 | 23.658 | 19.266 | 19.243 | 23.798 | 7.098  |
| 3 | 0.0617 | 31.142 | 21.822 | 21.499 | 32.604 | 19.221 |
| 3 | 0.0627 | 12.607 | 12.931 | 14.416 | 14.945 | 14.134 |
| 3 | 0.0637 | 10.587 | 14.880 | 13.383 | 14.277 | 13.491 |
| 3 | 0.0647 | 13.560 | 21.031 | 17.797 | 17.862 | 9.917  |
| 3 | 0.0657 | 30.385 | 15.721 | 25.258 | 15.142 | 15.609 |
| 3 | 0.0667 | 17.544 | 13.484 | 19.133 | 14.390 | 14.850 |
| 3 | 0.0677 | 11.684 | 12.091 | 15.122 | 16.469 | 24.716 |
| 3 | 0.0687 | 20.574 | 21.886 | 25.516 | 13.137 | 10.492 |
| 3 | 0.0697 | 17.299 | 24.104 | 25.773 | 23.744 | 18.037 |
| 3 | 0.0707 | 22.051 | 18.435 | 18.872 | 27.870 | 10.253 |
| 3 | 0.0717 | 27.138 | 19.025 | 28.219 | 18.911 | 8.129  |
| 3 | 0.0727 | 19.623 | 16.034 | 19.336 | 21.690 | 8.929  |
| 3 | 0.0737 | 24.883 | 19.669 | 14.180 | 12.539 | 17.069 |
| 3 | 0.0747 | 16.873 | 10.579 | 5.745  | 22.153 | 22.183 |
| 3 | 0.0757 | 39.179 | 22.915 | 23.331 | 27.191 | 25.908 |
| 3 | 0.0767 | 12.516 | 10.677 | 11.514 | 8.857  | 8.818  |
| 3 | 0.0777 | 10.392 | 24.007 | 11.713 | 18.979 | 8.947  |
| 3 | 0.0787 | 17.580 | 23.434 | 20.462 | 8.883  | 8.827  |
| 3 | 0.0797 | 23.415 | 25.788 | 31.361 | 21.064 | 18.113 |
| 3 | 0.0807 | 17.830 | 19.584 | 13.844 | 12.706 | 20.848 |
| 3 | 0.0817 | 31.737 | 31.562 | 25.936 | 5.610  | 16.323 |
| 3 | 0.0827 | 28.570 | 25.033 | 22.181 | 17.849 | 12.493 |
| 3 | 0.0837 | 24.847 | 28.962 | 28.552 | 18.293 | 11.864 |
| 3 | 0.0847 | 24.966 | 28.974 | 28.780 | 18.100 | 12.182 |
| 3 | 0.0857 | 17.799 | 24.610 | 19.788 | 21.342 | 21.321 |
| 3 | 0.0867 | 17.917 | 24.616 | 19.868 | 21.257 | 21.392 |
| 3 | 0.0877 | 13.684 | 14.678 | 14.328 | 10.621 | 18.631 |
| 3 | 0.0887 | 17.270 | 19.671 | 19.119 | 9.523  | 16.641 |
| 3 | 0.0897 | 24.847 | 21.880 | 25.810 | 12.503 | 10.205 |
| 3 | 0.0907 | 24.859 | 30.286 | 26.710 | 11.682 | 9.309  |
| 3 | 0.0917 | 23.087 | 31.462 | 22.922 | 12.314 | 15.236 |
| 3 | 0.0927 | 18.831 | 26.047 | 21.266 | 16.056 | 12.069 |

|   |        |        |        |        |        |        |
|---|--------|--------|--------|--------|--------|--------|
| 3 | 0.0937 | 18.199 | 24.896 | 24.013 | 15.032 | 17.240 |
| 3 | 0.0947 | 20.956 | 19.444 | 16.017 | 15.336 | 12.871 |
| 3 | 0.0957 | 13.498 | 29.169 | 16.323 | 25.950 | 21.986 |
| 3 | 0.0967 | 9.774  | 13.186 | 8.345  | 24.734 | 31.286 |
| 3 | 0.0977 | 9.773  | 13.205 | 8.333  | 24.716 | 31.295 |
| 3 | 0.0987 | 35.598 | 13.702 | 14.181 | 13.632 | 21.603 |
| 3 | 0.0997 | 37.506 | 16.154 | 17.132 | 17.304 | 22.364 |
| 3 | 0.1007 | 32.195 | 15.209 | 15.446 | 8.003  | 21.900 |
| 3 | 0.1017 | 27.724 | 12.526 | 10.815 | 18.119 | 13.366 |
| 3 | 0.1027 | 9.571  | 10.009 | 9.913  | 12.470 | 11.610 |
| 3 | 0.1037 | 29.804 | 10.969 | 18.605 | 15.802 | 17.529 |
| 3 | 0.1047 | 12.417 | 19.098 | 14.886 | 9.779  | 4.547  |
| 3 | 0.1057 | 12.531 | 10.950 | 6.947  | 16.299 | 18.498 |
| 3 | 0.1067 | 28.346 | 23.258 | 22.300 | 10.209 | 18.105 |
| 3 | 0.1077 | 20.632 | 18.426 | 17.043 | 10.136 | 25.475 |
| 3 | 0.1087 | 20.644 | 18.390 | 16.978 | 10.083 | 25.415 |
| 3 | 0.1097 | 7.858  | 10.333 | 10.345 | 8.522  | 18.459 |
| 3 | 0.1107 | 24.540 | 14.089 | 13.130 | 22.094 | 11.455 |
| 3 | 0.1117 | 20.781 | 25.446 | 18.866 | 19.768 | 9.118  |
| 3 | 0.1127 | 19.718 | 24.052 | 16.539 | 20.693 | 11.565 |
| 3 | 0.1137 | 29.204 | 18.312 | 22.242 | 11.572 | 15.919 |
| 3 | 0.1147 | 15.681 | 14.051 | 15.669 | 13.596 | 18.600 |
| 3 | 0.1157 | 18.641 | 17.433 | 17.179 | 7.719  | 21.259 |
| 3 | 0.1167 | 23.381 | 22.030 | 16.651 | 9.216  | 23.091 |
| 3 | 0.1177 | 23.348 | 22.001 | 16.695 | 8.977  | 23.173 |
| 3 | 0.1187 | 16.497 | 14.150 | 13.020 | 17.090 | 28.864 |
| 3 | 0.1197 | 31.292 | 18.489 | 13.306 | 25.392 | 21.824 |
| 3 | 0.1207 | 19.555 | 9.189  | 10.582 | 14.611 | 20.525 |
| 3 | 0.1217 | 26.741 | 23.411 | 19.294 | 25.229 | 19.883 |
| 3 | 0.1227 | 26.236 | 13.848 | 16.442 | 18.897 | 18.529 |
| 3 | 0.1237 | 26.149 | 13.846 | 16.429 | 18.940 | 18.409 |
| 3 | 0.1247 | 31.465 | 26.126 | 26.969 | 21.828 | 15.361 |
| 3 | 0.1257 | 28.310 | 11.473 | 19.061 | 12.687 | 16.013 |
| 3 | 0.1267 | 14.227 | 16.993 | 8.899  | 27.253 | 13.276 |
| 3 | 0.1277 | 12.290 | 13.534 | 15.492 | 6.057  | 14.694 |
| 3 | 0.1287 | 8.517  | 14.868 | 12.072 | 14.348 | 17.125 |
| 3 | 0.1297 | 8.567  | 15.002 | 12.152 | 14.460 | 16.977 |
| 3 | 0.1307 | 15.722 | 14.537 | 21.125 | 14.421 | 19.452 |
| 3 | 0.1317 | 9.444  | 10.723 | 13.984 | 16.657 | 18.316 |
| 3 | 0.1327 | 26.860 | 17.767 | 18.932 | 7.534  | 16.858 |
| 3 | 0.1337 | 8.748  | 9.522  | 7.589  | 8.087  | 24.979 |
| 3 | 0.1347 | 6.448  | 6.651  | 8.434  | 6.601  | 29.384 |
| 3 | 0.1357 | 29.216 | 12.963 | 19.034 | 16.280 | 14.462 |
| 3 | 0.1367 | 29.223 | 12.949 | 19.030 | 16.254 | 14.446 |
| 3 | 0.1377 | 8.514  | 8.948  | 13.016 | 7.723  | 16.268 |
| 3 | 0.1387 | 18.409 | 22.197 | 28.212 | 12.575 | 18.877 |
| 3 | 0.1397 | 11.054 | 13.188 | 15.753 | 7.887  | 13.421 |
| 3 | 0.1407 | 13.190 | 11.260 | 15.952 | 7.862  | 14.891 |
| 3 | 0.1417 | 3.858  | 8.123  | 8.780  | 6.816  | 6.048  |
| 3 | 0.1427 | 3.399  | 7.060  | 7.643  | 4.789  | 4.941  |

|   |        |        |        |        |        |        |
|---|--------|--------|--------|--------|--------|--------|
| 3 | 0.1437 | 3.445  | 7.118  | 7.715  | 4.919  | 4.852  |
| 3 | 0.1447 | 35.311 | 23.801 | 24.442 | 6.303  | 13.729 |
| 3 | 0.1457 | 28.176 | 18.373 | 16.280 | 8.635  | 11.432 |
| 3 | 0.1467 | 21.199 | 12.621 | 15.530 | 9.146  | 15.146 |
| 3 | 0.1477 | 12.813 | 11.643 | 10.057 | 17.372 | 20.426 |
| 3 | 0.1487 | 11.767 | 14.615 | 13.116 | 12.073 | 16.311 |
| 3 | 0.1497 | 23.639 | 9.037  | 18.632 | 10.032 | 16.379 |
| 3 | 0.1507 | 12.778 | 11.595 | 12.456 | 24.549 | 14.357 |
| 3 | 0.1517 | 8.132  | 12.955 | 11.061 | 14.331 | 17.187 |
| 3 | 0.1527 | 1.393  | 2.758  | 2.474  | 5.177  | 7.352  |
| 3 | 0.1537 | 4.740  | 3.195  | 5.296  | 7.441  | 8.179  |
| 3 | 0.1547 | 17.655 | 8.844  | 17.807 | 13.283 | 12.205 |
| 3 | 0.1557 | 19.211 | 13.896 | 17.791 | 7.052  | 7.140  |
| 3 | 0.1567 | 13.207 | 13.404 | 14.592 | 12.119 | 10.474 |
| 3 | 0.1577 | 10.186 | 8.439  | 12.054 | 11.331 | 31.364 |
| 3 | 0.1587 | 10.186 | 8.470  | 12.064 | 11.248 | 31.315 |
| 3 | 0.1597 | 19.715 | 7.831  | 18.303 | 18.057 | 29.900 |
| 3 | 0.1607 | 18.278 | 13.352 | 12.598 | 31.709 | 26.837 |
| 3 | 0.1617 | 12.765 | 12.440 | 17.913 | 12.429 | 20.451 |
| 3 | 0.1627 | 25.718 | 16.313 | 22.609 | 24.004 | 36.872 |
| 3 | 0.1637 | 21.166 | 18.726 | 15.625 | 15.177 | 24.830 |
| 3 | 0.1647 | 10.243 | 13.812 | 10.927 | 15.721 | 19.503 |
| 3 | 0.1657 | 15.046 | 7.865  | 10.517 | 13.222 | 21.523 |
| 3 | 0.1667 | 17.918 | 13.368 | 13.013 | 7.594  | 20.763 |
| 3 | 0.1677 | 8.843  | 4.171  | 7.768  | 5.713  | 13.492 |
| 3 | 0.1687 | 16.986 | 10.023 | 12.661 | 9.951  | 23.290 |
| 3 | 0.1697 | 20.319 | 10.869 | 13.843 | 4.885  | 17.023 |
| 3 | 0.1707 | 8.932  | 3.983  | 3.837  | 16.760 | 28.530 |
| 3 | 0.1717 | 13.245 | 7.947  | 13.156 | 10.671 | 23.145 |
| 3 | 0.1727 | 11.415 | 9.585  | 13.061 | 13.193 | 26.311 |
| 3 | 0.1737 | 3.751  | 6.357  | 7.530  | 6.376  | 23.300 |
| 3 | 0.1747 | 13.194 | 10.000 | 10.241 | 17.265 | 30.023 |
| 3 | 0.1757 | 3.489  | 5.951  | 6.576  | 7.473  | 12.098 |
| 3 | 0.1767 | 5.640  | 8.547  | 6.495  | 10.499 | 11.779 |
| 3 | 0.1777 | 13.277 | 8.574  | 10.922 | 11.173 | 13.890 |
| 3 | 0.1787 | 6.788  | 3.370  | 6.530  | 16.406 | 16.057 |
| 3 | 0.1797 | 15.221 | 10.108 | 11.452 | 11.913 | 18.731 |
| 3 | 0.1807 | 7.226  | 7.449  | 8.668  | 10.859 | 11.047 |
| 3 | 0.1817 | 7.736  | 10.146 | 14.304 | 7.205  | 10.212 |
| 3 | 0.1827 | 7.736  | 10.146 | 14.309 | 7.205  | 10.152 |
| 3 | 0.1837 | 10.406 | 6.342  | 13.187 | 9.889  | 13.445 |
| 3 | 0.1847 | 15.237 | 18.540 | 17.477 | 9.566  | 19.450 |
| 3 | 0.1857 | 7.267  | 7.555  | 10.193 | 13.563 | 14.207 |
| 3 | 0.1867 | 9.902  | 8.704  | 10.261 | 8.160  | 8.104  |
| 3 | 0.1877 | 8.675  | 11.882 | 10.332 | 11.115 | 24.061 |
| 3 | 0.1887 | 24.914 | 20.595 | 23.574 | 6.496  | 20.733 |
| 3 | 0.1897 | 18.246 | 14.661 | 20.948 | 15.825 | 15.399 |
| 3 | 0.1907 | 10.330 | 12.066 | 13.364 | 29.109 | 25.657 |
| 3 | 0.1917 | 8.617  | 6.388  | 7.902  | 16.541 | 15.227 |
| 3 | 0.1927 | 19.235 | 19.871 | 19.440 | 12.566 | 17.838 |

|   |        |        |        |        |        |        |
|---|--------|--------|--------|--------|--------|--------|
| 3 | 0.1937 | 6.659  | 6.191  | 7.639  | 17.137 | 13.348 |
| 3 | 0.1947 | 12.473 | 2.325  | 6.741  | 16.722 | 11.640 |
| 3 | 0.1957 | 7.697  | 3.369  | 8.080  | 9.483  | 8.512  |
| 3 | 0.1967 | 12.127 | 5.894  | 14.404 | 15.663 | 16.892 |
| 3 | 0.1977 | 9.945  | 9.359  | 10.513 | 14.831 | 21.254 |
| 3 | 0.1987 | 11.185 | 11.504 | 12.496 | 12.394 | 9.263  |
| 3 | 0.1997 | 11.510 | 9.455  | 13.893 | 10.410 | 10.465 |
| 3 | 0.2007 | 14.685 | 18.994 | 22.293 | 22.387 | 19.943 |
| 3 | 0.2017 | 22.236 | 23.023 | 20.108 | 18.384 | 21.376 |
| 3 | 0.2027 | 12.394 | 14.288 | 15.696 | 11.029 | 18.522 |
| 3 | 0.2037 | 17.013 | 7.198  | 7.098  | 7.929  | 20.106 |
| 3 | 0.2047 | 18.282 | 18.448 | 17.421 | 11.463 | 23.218 |
| 3 | 0.2057 | 7.790  | 11.439 | 9.196  | 12.723 | 16.553 |
| 3 | 0.2067 | 8.017  | 10.385 | 8.766  | 6.355  | 17.904 |
| 3 | 0.2077 | 15.077 | 18.553 | 13.539 | 21.802 | 19.545 |
| 3 | 0.2087 | 11.991 | 21.037 | 13.477 | 15.597 | 9.888  |
| 3 | 0.2097 | 14.697 | 13.327 | 15.599 | 10.019 | 16.090 |
| 3 | 0.2107 | 10.491 | 12.595 | 11.504 | 8.835  | 3.793  |
| 3 | 0.2117 | 12.819 | 17.611 | 12.638 | 12.754 | 20.809 |
| 3 | 0.2127 | 8.007  | 12.021 | 7.784  | 7.132  | 15.904 |
| 3 | 0.2137 | 10.164 | 15.370 | 10.805 | 16.156 | 13.153 |
| 3 | 0.2147 | 7.405  | 14.682 | 11.780 | 20.823 | 15.624 |
| 3 | 0.2157 | 13.917 | 20.166 | 12.177 | 24.826 | 21.978 |
| 3 | 0.2167 | 16.921 | 20.918 | 21.532 | 14.766 | 12.996 |
| 3 | 0.2177 | 12.694 | 18.900 | 16.409 | 9.373  | 14.431 |
| 3 | 0.2187 | 10.755 | 13.202 | 8.554  | 12.664 | 10.683 |
| 3 | 0.2197 | 18.799 | 14.153 | 14.158 | 15.914 | 26.955 |
| 3 | 0.2207 | 13.582 | 19.825 | 19.936 | 13.006 | 20.543 |
| 3 | 0.2217 | 12.973 | 9.071  | 10.492 | 10.107 | 13.690 |
| 3 | 0.2227 | 16.536 | 12.565 | 16.050 | 10.782 | 18.044 |
| 3 | 0.2237 | 9.631  | 11.257 | 6.812  | 26.045 | 20.366 |
| 3 | 0.2247 | 16.034 | 11.098 | 11.326 | 21.885 | 18.011 |
| 3 | 0.2257 | 17.098 | 19.767 | 19.667 | 12.916 | 11.681 |
| 3 | 0.2267 | 2.338  | 2.479  | 4.032  | 6.241  | 8.856  |
| 3 | 0.2277 | 7.845  | 5.049  | 8.368  | 12.250 | 24.458 |
| 3 | 0.2287 | 22.747 | 7.203  | 8.299  | 17.792 | 16.095 |
| 3 | 0.2297 | 11.884 | 11.720 | 7.516  | 12.053 | 23.269 |
| 3 | 0.2307 | 11.887 | 11.717 | 7.505  | 12.052 | 23.271 |
| 3 | 0.2317 | 11.431 | 9.762  | 7.252  | 6.638  | 18.513 |
| 3 | 0.2327 | 13.014 | 10.351 | 12.289 | 19.113 | 20.315 |
| 3 | 0.2337 | 19.552 | 11.056 | 11.989 | 9.064  | 17.330 |
| 3 | 0.2347 | 17.374 | 11.486 | 11.381 | 8.880  | 18.471 |
| 3 | 0.2357 | 10.317 | 11.336 | 11.278 | 17.202 | 10.666 |
| 3 | 0.2367 | 2.409  | 2.651  | 2.081  | 14.350 | 12.348 |
| 3 | 0.2377 | 5.880  | 5.291  | 5.305  | 4.699  | 8.897  |
| 3 | 0.2387 | 12.656 | 15.168 | 11.894 | 11.026 | 18.473 |
| 3 | 0.2397 | 8.668  | 12.156 | 9.054  | 7.664  | 11.116 |
| 3 | 0.2407 | 10.176 | 9.486  | 8.018  | 13.998 | 12.665 |
| 3 | 0.2417 | 5.447  | 2.713  | 5.165  | 2.910  | 7.886  |
| 3 | 0.2427 | 6.421  | 4.483  | 5.256  | 8.487  | 12.196 |

|   |        |        |        |        |        |        |
|---|--------|--------|--------|--------|--------|--------|
| 3 | 0.2437 | 17.317 | 8.797  | 10.253 | 12.453 | 10.175 |
| 3 | 0.2447 | 13.490 | 8.797  | 11.061 | 9.689  | 19.261 |
| 3 | 0.2457 | 14.836 | 7.528  | 12.788 | 10.088 | 14.818 |
| 3 | 0.2467 | 9.262  | 4.518  | 6.308  | 8.047  | 13.541 |
| 3 | 0.2477 | 8.366  | 7.600  | 5.207  | 22.376 | 11.255 |
| 3 | 0.2487 | 21.168 | 18.500 | 10.348 | 27.024 | 29.587 |
| 3 | 0.2497 | 17.147 | 8.744  | 8.813  | 17.560 | 18.811 |
| 3 | 0.2507 | 17.499 | 7.538  | 12.640 | 17.782 | 22.508 |
| 3 | 0.2517 | 14.796 | 10.642 | 15.057 | 23.670 | 15.730 |
| 3 | 0.2527 | 14.243 | 8.826  | 14.698 | 16.434 | 11.683 |
| 3 | 0.2537 | 18.078 | 17.749 | 18.674 | 15.416 | 13.512 |
| 3 | 0.2547 | 20.119 | 11.994 | 15.018 | 22.197 | 33.735 |
| 3 | 0.2557 | 16.538 | 19.488 | 17.890 | 13.328 | 24.718 |
| 3 | 0.2567 | 16.914 | 18.959 | 14.473 | 21.294 | 29.479 |
| 3 | 0.2577 | 11.445 | 9.755  | 10.356 | 16.576 | 14.860 |
| 3 | 0.2587 | 18.783 | 15.649 | 18.348 | 17.005 | 22.616 |
| 3 | 0.2597 | 43.522 | 14.053 | 15.444 | 19.677 | 28.285 |
| 3 | 0.2607 | 17.807 | 11.623 | 12.609 | 13.870 | 8.682  |
| 3 | 0.2617 | 5.219  | 8.390  | 5.273  | 20.554 | 19.951 |
| 3 | 0.2627 | 5.531  | 1.560  | 4.619  | 3.437  | 0.898  |
| 3 | 0.2637 | 9.103  | 7.266  | 14.775 | 2.231  | 10.168 |
| 3 | 0.2647 | 8.647  | 7.741  | 15.203 | 3.035  | 10.853 |
| 3 | 0.2657 | 8.643  | 7.744  | 15.204 | 3.083  | 10.861 |
| 3 | 0.2667 | 5.767  | 2.606  | 3.649  | 4.317  | 7.567  |
| 3 | 0.2677 | 3.507  | 1.296  | 2.705  | 4.049  | 5.556  |
| 3 | 0.2687 | 5.202  | 6.183  | 8.459  | 6.612  | 12.273 |
| 3 | 0.2697 | 13.951 | 13.719 | 15.994 | 7.022  | 14.933 |
| 3 | 0.2707 | 13.988 | 13.551 | 15.821 | 7.214  | 14.976 |
| 3 | 0.2717 | 20.546 | 28.745 | 26.272 | 11.641 | 20.852 |
| 3 | 0.2727 | 9.188  | 11.296 | 16.350 | 22.530 | 28.821 |
| 3 | 0.2737 | 7.089  | 7.143  | 10.593 | 7.173  | 20.044 |
| 3 | 0.2747 | 8.716  | 5.065  | 7.489  | 9.772  | 13.336 |
| 3 | 0.2757 | 16.947 | 17.393 | 11.372 | 17.725 | 15.957 |
| 3 | 0.2767 | 16.094 | 17.287 | 11.239 | 19.864 | 8.752  |
| 3 | 0.2777 | 9.779  | 9.132  | 7.767  | 16.123 | 13.669 |
| 3 | 0.2787 | 18.579 | 12.763 | 12.460 | 24.381 | 22.364 |
| 3 | 0.2797 | 14.517 | 9.482  | 11.387 | 16.078 | 23.328 |
| 3 | 0.2807 | 16.331 | 9.430  | 11.201 | 15.737 | 22.098 |
| 3 | 0.2817 | 12.766 | 13.795 | 10.152 | 28.687 | 15.023 |
| 3 | 0.2827 | 13.001 | 9.322  | 9.353  | 16.420 | 21.222 |
| 3 | 0.2837 | 14.979 | 8.011  | 10.781 | 18.396 | 12.984 |
| 3 | 0.2847 | 22.543 | 15.029 | 21.382 | 18.217 | 18.737 |
| 3 | 0.2857 | 11.264 | 8.602  | 11.021 | 16.765 | 14.229 |
| 3 | 0.2867 | 5.873  | 4.932  | 4.820  | 21.419 | 13.617 |
| 3 | 0.2877 | 7.069  | 5.194  | 8.534  | 22.922 | 21.950 |
| 3 | 0.2887 | 10.808 | 12.034 | 12.113 | 25.050 | 18.533 |
| 3 | 0.2897 | 17.838 | 11.854 | 17.226 | 13.958 | 14.920 |
| 3 | 0.2907 | 11.487 | 6.325  | 2.605  | 19.143 | 24.816 |
| 3 | 0.2917 | 11.286 | 13.300 | 8.536  | 26.856 | 22.929 |
| 3 | 0.2927 | 6.867  | 9.582  | 8.195  | 27.758 | 11.418 |

|   |        |        |        |        |        |        |
|---|--------|--------|--------|--------|--------|--------|
| 3 | 0.2937 | 8.785  | 8.635  | 5.096  | 15.050 | 12.050 |
| 3 | 0.2947 | 9.164  | 8.622  | 8.392  | 16.471 | 17.149 |
| 3 | 0.2957 | 11.981 | 3.608  | 6.163  | 18.259 | 18.287 |
| 3 | 0.2967 | 8.381  | 8.413  | 8.788  | 17.720 | 25.836 |
| 3 | 0.2977 | 9.660  | 9.851  | 7.751  | 8.758  | 24.328 |
| 3 | 0.2987 | 7.787  | 5.459  | 4.854  | 11.121 | 21.099 |
| 3 | 0.2997 | 16.340 | 7.625  | 12.274 | 20.160 | 23.228 |
| 3 | 0.3007 | 9.314  | 6.934  | 8.195  | 21.283 | 20.778 |
| 3 | 0.3017 | 8.390  | 7.147  | 5.155  | 16.218 | 13.966 |
| 3 | 0.3027 | 8.126  | 5.282  | 6.388  | 18.262 | 19.125 |
| 3 | 0.3037 | 8.940  | 6.622  | 9.738  | 14.026 | 8.518  |
| 3 | 0.3047 | 10.261 | 7.177  | 7.842  | 13.417 | 26.346 |
| 3 | 0.3057 | 10.455 | 8.862  | 11.541 | 23.424 | 25.140 |
| 3 | 0.3067 | 8.371  | 4.931  | 6.655  | 24.881 | 29.283 |
| 3 | 0.3077 | 11.716 | 10.261 | 10.020 | 22.836 | 31.748 |
| 3 | 0.3087 | 6.923  | 10.391 | 12.312 | 11.740 | 16.340 |
| 3 | 0.3097 | 15.701 | 9.352  | 11.787 | 26.693 | 24.695 |
| 3 | 0.3107 | 11.071 | 7.337  | 6.500  | 16.313 | 8.810  |
| 3 | 0.3117 | 21.934 | 12.188 | 14.414 | 11.124 | 25.711 |
| 3 | 0.3127 | 19.495 | 9.522  | 8.776  | 15.165 | 31.721 |
| 3 | 0.3137 | 10.427 | 14.283 | 12.555 | 7.586  | 21.256 |
| 3 | 0.3147 | 12.972 | 17.147 | 15.380 | 17.716 | 28.212 |
| 3 | 0.3157 | 10.061 | 10.450 | 7.176  | 17.286 | 20.037 |
| 3 | 0.3167 | 10.111 | 13.865 | 7.730  | 17.308 | 17.421 |
| 3 | 0.3177 | 13.151 | 7.788  | 7.458  | 13.338 | 17.537 |
| 3 | 0.3187 | 12.397 | 6.930  | 7.467  | 13.747 | 14.884 |
| 3 | 0.3197 | 10.316 | 8.005  | 8.132  | 5.972  | 15.811 |
| 3 | 0.3207 | 10.051 | 13.452 | 11.102 | 12.231 | 22.866 |
| 3 | 0.3217 | 7.853  | 6.627  | 4.983  | 18.776 | 22.314 |
| 3 | 0.3227 | 10.164 | 7.387  | 6.161  | 19.026 | 16.786 |
| 3 | 0.3237 | 6.991  | 7.669  | 6.060  | 21.313 | 20.584 |
| 3 | 0.3247 | 12.106 | 11.996 | 9.297  | 24.125 | 18.297 |
| 3 | 0.3257 | 9.326  | 13.985 | 9.782  | 27.665 | 14.729 |
| 3 | 0.3267 | 11.334 | 10.619 | 11.177 | 12.150 | 17.967 |
| 3 | 0.3277 | 7.533  | 6.772  | 6.218  | 6.904  | 9.393  |
| 3 | 0.3287 | 10.074 | 10.615 | 10.076 | 6.134  | 13.494 |
| 3 | 0.3297 | 11.756 | 9.313  | 11.653 | 4.336  | 13.871 |
| 3 | 0.3307 | 7.788  | 7.894  | 9.369  | 8.764  | 11.086 |
| 3 | 0.3317 | 16.359 | 14.862 | 12.916 | 18.136 | 23.781 |
| 3 | 0.3327 | 7.172  | 13.264 | 10.312 | 16.616 | 20.439 |
| 3 | 0.3337 | 16.146 | 14.022 | 9.660  | 16.942 | 20.611 |
| 3 | 0.3347 | 9.386  | 15.103 | 10.891 | 16.090 | 14.443 |
| 3 | 0.3357 | 7.612  | 7.108  | 6.278  | 9.019  | 12.427 |
| 3 | 0.3367 | 13.431 | 10.441 | 10.501 | 16.562 | 12.879 |
| 3 | 0.3377 | 19.529 | 11.016 | 14.667 | 24.165 | 18.739 |
| 3 | 0.3387 | 13.610 | 13.570 | 15.021 | 14.202 | 10.206 |
| 3 | 0.3397 | 19.180 | 11.844 | 16.084 | 17.860 | 13.011 |
| 3 | 0.3407 | 13.880 | 7.291  | 9.302  | 19.618 | 16.394 |
| 3 | 0.3417 | 19.585 | 17.784 | 17.750 | 22.852 | 19.745 |
| 3 | 0.3427 | 13.916 | 9.733  | 7.293  | 25.453 | 25.669 |

|   |        |        |        |        |        |        |
|---|--------|--------|--------|--------|--------|--------|
| 3 | 0.3437 | 11.206 | 9.031  | 8.914  | 18.416 | 15.960 |
| 3 | 0.3447 | 8.440  | 7.590  | 11.675 | 11.070 | 11.947 |
| 3 | 0.3457 | 8.918  | 12.933 | 10.978 | 17.176 | 13.774 |
| 3 | 0.3467 | 11.166 | 7.497  | 7.815  | 15.651 | 14.861 |
| 3 | 0.3477 | 12.710 | 13.359 | 10.129 | 17.754 | 10.276 |
| 3 | 0.3487 | 10.589 | 8.241  | 7.734  | 15.265 | 17.272 |
| 3 | 0.3497 | 12.492 | 12.309 | 9.623  | 17.193 | 13.246 |
| 3 | 0.3507 | 15.426 | 11.835 | 14.409 | 19.048 | 23.768 |
| 3 | 0.3517 | 13.492 | 18.625 | 13.767 | 23.114 | 27.785 |
| 3 | 0.3527 | 22.112 | 19.136 | 17.277 | 15.802 | 30.856 |
| 3 | 0.3537 | 31.686 | 21.641 | 17.656 | 17.824 | 21.177 |
| 3 | 0.3547 | 15.999 | 9.687  | 9.712  | 14.544 | 24.290 |
| 3 | 0.3557 | 12.549 | 9.872  | 4.798  | 18.786 | 27.865 |
| 3 | 0.3567 | 8.527  | 4.249  | 5.040  | 16.468 | 25.418 |
| 3 | 0.3577 | 9.637  | 4.336  | 4.776  | 17.402 | 36.551 |
| 3 | 0.3587 | 13.086 | 15.217 | 9.906  | 26.455 | 46.229 |
| 3 | 0.3597 | 7.486  | 15.320 | 8.961  | 21.421 | 23.229 |
| 3 | 0.3607 | 8.745  | 10.644 | 12.998 | 17.343 | 13.157 |
| 3 | 0.3617 | 13.226 | 10.186 | 12.511 | 18.808 | 10.326 |
| 3 | 0.3627 | 9.849  | 12.884 | 7.490  | 14.505 | 4.837  |
| 3 | 0.3637 | 7.346  | 6.203  | 5.277  | 12.634 | 14.868 |
| 3 | 0.3647 | 18.419 | 19.392 | 16.619 | 25.179 | 29.890 |
| 3 | 0.3657 | 10.985 | 4.173  | 5.331  | 16.118 | 19.599 |
| 3 | 0.3667 | 8.957  | 1.626  | 4.984  | 8.795  | 5.382  |
| 3 | 0.3677 | 15.724 | 8.042  | 9.610  | 21.447 | 14.602 |
| 3 | 0.3687 | 20.428 | 14.846 | 15.525 | 10.344 | 7.871  |
| 3 | 0.3697 | 19.492 | 12.526 | 14.996 | 13.145 | 18.476 |
| 3 | 0.3707 | 29.677 | 26.074 | 17.799 | 22.056 | 25.173 |
| 3 | 0.3717 | 29.667 | 26.066 | 17.797 | 22.056 | 25.168 |
| 3 | 0.3727 | 32.717 | 36.115 | 33.398 | 23.992 | 23.156 |
| 3 | 0.3737 | 15.342 | 14.496 | 9.460  | 14.651 | 14.395 |
| 3 | 0.3747 | 15.253 | 12.367 | 6.398  | 11.222 | 15.328 |
| 3 | 0.3757 | 17.332 | 11.133 | 11.554 | 24.957 | 18.835 |
| 3 | 0.3767 | 12.914 | 8.420  | 8.581  | 29.027 | 19.803 |
| 3 | 0.3777 | 18.376 | 15.986 | 17.501 | 18.202 | 19.577 |
| 3 | 0.3787 | 9.711  | 10.064 | 13.787 | 13.533 | 15.774 |
| 3 | 0.3797 | 14.612 | 13.736 | 11.173 | 19.893 | 21.223 |
| 3 | 0.3807 | 19.316 | 13.452 | 17.445 | 22.488 | 32.042 |
| 3 | 0.3817 | 12.786 | 16.820 | 14.152 | 13.784 | 12.429 |
| 3 | 0.3827 | 17.544 | 12.866 | 12.139 | 14.425 | 5.757  |
| 3 | 0.3837 | 15.375 | 7.158  | 9.448  | 15.279 | 7.309  |
| 3 | 0.3847 | 17.181 | 11.172 | 12.964 | 19.164 | 20.283 |
| 3 | 0.3857 | 9.620  | 4.570  | 5.816  | 15.546 | 26.786 |
| 3 | 0.3867 | 9.197  | 4.309  | 5.395  | 18.295 | 19.790 |
| 3 | 0.3877 | 8.053  | 3.801  | 4.990  | 16.420 | 11.464 |
| 3 | 0.3887 | 3.113  | 3.001  | 3.707  | 10.436 | 26.505 |
| 3 | 0.3897 | 7.318  | 5.403  | 3.138  | 15.813 | 20.611 |
| 3 | 0.3907 | 21.724 | 11.976 | 10.542 | 25.733 | 30.368 |
| 3 | 0.3917 | 15.599 | 9.204  | 8.376  | 31.076 | 25.453 |
| 3 | 0.3927 | 19.802 | 11.640 | 12.030 | 23.025 | 16.730 |



|   |        |        |        |        |        |        |
|---|--------|--------|--------|--------|--------|--------|
| 3 | 0.3937 | 5.513  | 4.370  | 2.986  | 12.930 | 9.501  |
| 3 | 0.3947 | 13.327 | 10.326 | 9.404  | 10.392 | 7.321  |
| 3 | 0.3957 | 10.922 | 13.028 | 9.191  | 19.777 | 15.937 |
| 3 | 0.3967 | 11.428 | 6.711  | 8.350  | 14.766 | 13.788 |
| 3 | 0.3977 | 24.480 | 16.947 | 13.492 | 17.651 | 23.261 |
| 3 | 0.3987 | 17.496 | 10.905 | 8.366  | 15.167 | 25.399 |
| 3 | 0.3997 | 6.905  | 7.949  | 7.558  | 11.306 | 10.362 |
| 3 | 0.4007 | 13.767 | 15.709 | 11.538 | 26.651 | 19.788 |
| 3 | 0.4017 | 12.980 | 17.284 | 12.067 | 20.050 | 23.348 |
| 3 | 0.4027 | 6.256  | 5.378  | 3.865  | 21.807 | 23.235 |
| 3 | 0.4037 | 8.172  | 6.987  | 7.714  | 33.330 | 27.193 |
| 3 | 0.4047 | 7.809  | 6.783  | 9.998  | 20.732 | 15.423 |
| 3 | 0.4057 | 13.796 | 7.511  | 13.600 | 25.677 | 14.457 |
| 3 | 0.4067 | 28.240 | 18.815 | 27.869 | 15.673 | 16.237 |
| 3 | 0.4077 | 16.602 | 11.236 | 11.455 | 22.558 | 17.550 |
| 3 | 0.4087 | 5.388  | 5.891  | 5.184  | 12.017 | 15.218 |
| 3 | 0.4097 | 6.966  | 10.225 | 11.426 | 13.220 | 20.363 |
| 3 | 0.4107 | 3.016  | 5.874  | 6.506  | 13.012 | 13.568 |
| 3 | 0.4117 | 17.281 | 7.556  | 15.591 | 29.428 | 20.015 |
| 3 | 0.4127 | 17.281 | 7.548  | 15.578 | 29.423 | 20.005 |
| 3 | 0.4137 | 6.855  | 9.984  | 15.966 | 11.366 | 12.356 |
| 3 | 0.4147 | 17.232 | 17.083 | 17.205 | 20.687 | 14.626 |
| 3 | 0.4157 | 20.102 | 15.182 | 15.609 | 21.955 | 17.335 |
| 3 | 0.4167 | 6.833  | 6.814  | 9.862  | 16.168 | 11.522 |
| 3 | 0.4177 | 14.359 | 12.055 | 12.951 | 14.793 | 14.195 |
| 3 | 0.4187 | 14.507 | 12.298 | 10.039 | 16.745 | 15.709 |
| 3 | 0.4197 | 13.284 | 11.057 | 9.898  | 10.748 | 19.620 |
| 3 | 0.4207 | 7.057  | 7.571  | 8.701  | 14.955 | 21.684 |
| 3 | 0.4217 | 16.506 | 10.190 | 14.862 | 18.341 | 25.101 |
| 3 | 0.4227 | 18.277 | 12.531 | 11.672 | 29.673 | 19.555 |
| 3 | 0.4237 | 16.293 | 11.075 | 9.566  | 20.005 | 10.074 |
| 3 | 0.4247 | 17.217 | 15.078 | 15.225 | 13.853 | 15.480 |
| 3 | 0.4257 | 19.346 | 21.283 | 22.787 | 30.021 | 17.375 |
| 3 | 0.4267 | 28.148 | 23.623 | 28.751 | 16.524 | 18.063 |
| 3 | 0.4277 | 13.974 | 7.182  | 8.380  | 14.576 | 18.867 |
| 3 | 0.4287 | 4.666  | 4.540  | 4.524  | 12.829 | 10.698 |
| 3 | 0.4297 | 6.807  | 3.408  | 8.908  | 20.026 | 18.113 |
| 3 | 0.4307 | 11.646 | 13.060 | 15.375 | 25.935 | 23.275 |
| 3 | 0.4317 | 13.979 | 15.312 | 13.851 | 15.021 | 15.968 |
| 3 | 0.4327 | 11.217 | 9.090  | 6.086  | 18.836 | 15.511 |
| 3 | 0.4337 | 13.230 | 10.308 | 16.481 | 14.206 | 20.544 |
| 3 | 0.4347 | 15.586 | 12.215 | 18.972 | 18.719 | 10.553 |
| 3 | 0.4357 | 11.403 | 17.202 | 9.304  | 27.665 | 17.308 |
| 3 | 0.4367 | 13.899 | 18.544 | 12.839 | 27.538 | 17.744 |
| 3 | 0.4377 | 16.485 | 17.324 | 14.226 | 24.296 | 14.421 |
| 3 | 0.4387 | 14.621 | 15.330 | 19.231 | 22.768 | 11.244 |
| 3 | 0.4397 | 9.481  | 16.834 | 12.326 | 20.068 | 7.382  |
| 3 | 0.4407 | 3.908  | 3.900  | 7.406  | 18.481 | 20.833 |
| 3 | 0.4417 | 5.968  | 8.690  | 10.166 | 22.184 | 22.602 |
| 3 | 0.4427 | 11.870 | 12.293 | 12.676 | 30.496 | 23.439 |

|   |        |        |        |        |        |        |
|---|--------|--------|--------|--------|--------|--------|
| 3 | 0.4437 | 11.799 | 14.430 | 14.465 | 17.736 | 17.451 |
| 3 | 0.4447 | 11.638 | 14.443 | 14.368 | 17.515 | 17.072 |
| 3 | 0.4457 | 10.675 | 12.101 | 11.414 | 17.294 | 17.421 |
| 3 | 0.4467 | 14.989 | 14.645 | 15.880 | 16.084 | 18.685 |
| 3 | 0.4477 | 14.116 | 10.651 | 17.695 | 23.574 | 15.936 |
| 3 | 0.4487 | 18.845 | 7.476  | 16.846 | 20.819 | 13.419 |
| 3 | 0.4497 | 12.641 | 13.235 | 20.166 | 14.177 | 11.673 |
| 3 | 0.4507 | 10.661 | 9.599  | 14.766 | 15.673 | 14.155 |
| 3 | 0.4517 | 10.123 | 10.427 | 12.980 | 19.759 | 13.967 |
| 3 | 0.4527 | 10.515 | 13.877 | 13.953 | 29.859 | 22.376 |
| 3 | 0.4537 | 10.813 | 15.868 | 11.086 | 28.549 | 15.646 |
| 3 | 0.4547 | 11.180 | 12.469 | 11.148 | 13.598 | 15.727 |
| 3 | 0.4557 | 9.990  | 11.955 | 14.490 | 13.233 | 11.227 |
| 3 | 0.4567 | 13.362 | 7.520  | 13.523 | 15.865 | 17.743 |
| 3 | 0.4577 | 17.443 | 14.726 | 17.596 | 18.873 | 18.542 |
| 3 | 0.4587 | 9.267  | 7.850  | 8.588  | 11.984 | 15.488 |
| 3 | 0.4597 | 15.424 | 20.002 | 16.515 | 11.416 | 14.538 |
| 3 | 0.4607 | 9.931  | 15.271 | 14.206 | 12.936 | 22.908 |
| 3 | 0.4617 | 21.708 | 14.263 | 22.470 | 18.056 | 19.435 |
| 3 | 0.4627 | 14.481 | 11.446 | 14.161 | 11.683 | 20.920 |
| 3 | 0.4637 | 14.841 | 14.386 | 18.633 | 14.758 | 22.467 |
| 3 | 0.4647 | 16.465 | 18.147 | 23.694 | 18.116 | 23.714 |
| 3 | 0.4657 | 13.705 | 13.970 | 21.609 | 16.154 | 35.487 |
| 3 | 0.4667 | 10.398 | 5.809  | 8.720  | 23.135 | 21.777 |
| 3 | 0.4677 | 13.723 | 9.835  | 12.113 | 14.472 | 16.423 |
| 3 | 0.4687 | 14.295 | 13.944 | 11.635 | 14.699 | 9.342  |
| 3 | 0.4697 | 5.677  | 4.368  | 7.303  | 19.176 | 25.134 |
| 3 | 0.4707 | 6.523  | 5.156  | 4.504  | 19.325 | 21.091 |
| 3 | 0.4717 | 16.449 | 11.877 | 13.603 | 13.336 | 15.039 |
| 3 | 0.4727 | 18.490 | 15.067 | 21.772 | 20.265 | 14.680 |
| 3 | 0.4737 | 11.248 | 8.287  | 14.879 | 9.686  | 10.195 |
| 3 | 0.4747 | 17.239 | 13.837 | 18.126 | 13.867 | 10.774 |
| 3 | 0.4757 | 20.805 | 16.292 | 20.712 | 17.854 | 10.225 |
| 3 | 0.4767 | 7.395  | 7.230  | 8.917  | 16.216 | 5.044  |
| 3 | 0.4777 | 11.730 | 5.537  | 10.666 | 13.752 | 6.633  |
| 3 | 0.4787 | 8.552  | 2.884  | 5.843  | 7.862  | 5.500  |
| 3 | 0.4797 | 9.722  | 11.856 | 12.819 | 12.940 | 11.869 |
| 3 | 0.4807 | 26.366 | 23.640 | 31.970 | 20.694 | 24.190 |
| 3 | 0.4817 | 30.339 | 26.775 | 35.369 | 8.477  | 15.293 |
| 3 | 0.4827 | 24.992 | 16.565 | 27.812 | 6.866  | 18.098 |
| 3 | 0.4837 | 11.070 | 6.588  | 13.166 | 7.503  | 17.112 |
| 3 | 0.4847 | 8.072  | 18.346 | 11.867 | 21.687 | 9.321  |
| 3 | 0.4857 | 4.998  | 9.480  | 6.496  | 20.435 | 12.177 |
| 3 | 0.4867 | 5.740  | 8.058  | 6.077  | 14.931 | 6.578  |
| 3 | 0.4877 | 3.264  | 8.326  | 5.501  | 7.214  | 7.206  |
| 3 | 0.4887 | 5.522  | 8.641  | 3.830  | 12.224 | 14.363 |
| 3 | 0.4897 | 15.569 | 13.726 | 12.626 | 17.505 | 10.689 |
| 3 | 0.4907 | 23.713 | 16.548 | 21.220 | 18.971 | 15.822 |
| 3 | 0.4917 | 24.655 | 16.453 | 22.653 | 15.268 | 14.030 |
| 3 | 0.4927 | 19.273 | 10.950 | 18.144 | 13.532 | 9.526  |

|   |        |        |        |        |        |        |
|---|--------|--------|--------|--------|--------|--------|
| 3 | 0.4937 | 19.258 | 11.575 | 17.588 | 21.351 | 24.673 |
| 3 | 0.4947 | 14.343 | 6.906  | 12.730 | 20.260 | 17.199 |
| 3 | 0.4957 | 4.487  | 7.029  | 5.945  | 9.581  | 18.820 |
| 3 | 0.4967 | 18.213 | 14.985 | 21.689 | 25.846 | 13.269 |
| 3 | 0.4977 | 16.244 | 7.647  | 12.573 | 10.763 | 10.563 |
| 3 | 0.4987 | 12.858 | 8.499  | 12.202 | 10.900 | 10.365 |
| 3 | 0.4997 | 9.648  | 5.459  | 8.812  | 11.758 | 4.186  |
| 3 | 0.5007 | 13.233 | 4.876  | 7.051  | 11.659 | 24.480 |
| 3 | 0.5017 | 15.410 | 10.435 | 15.526 | 11.538 | 20.795 |
| 3 | 0.5027 | 17.895 | 13.359 | 23.881 | 11.919 | 19.362 |
| 3 | 0.5037 | 9.581  | 3.610  | 6.909  | 11.243 | 14.559 |
| 3 | 0.5047 | 13.087 | 9.942  | 13.190 | 9.341  | 15.712 |
| 3 | 0.5057 | 19.319 | 15.890 | 23.685 | 13.945 | 21.718 |
| 3 | 0.5067 | 14.604 | 17.112 | 19.368 | 15.833 | 13.771 |
| 3 | 0.5077 | 9.837  | 10.209 | 13.714 | 11.239 | 9.189  |
| 3 | 0.5087 | 24.794 | 13.100 | 23.380 | 19.791 | 23.457 |
| 3 | 0.5097 | 18.178 | 10.726 | 11.845 | 12.036 | 18.191 |
| 3 | 0.5107 | 30.049 | 16.792 | 21.567 | 21.544 | 19.904 |
| 3 | 0.5117 | 14.394 | 8.843  | 11.049 | 5.299  | 13.033 |
| 3 | 0.5127 | 17.117 | 7.842  | 10.741 | 10.883 | 7.791  |
| 3 | 0.5137 | 15.030 | 12.646 | 14.321 | 9.308  | 5.329  |
| 3 | 0.5147 | 14.958 | 12.570 | 14.262 | 9.261  | 5.469  |
| 3 | 0.5157 | 14.890 | 12.497 | 14.200 | 9.216  | 5.619  |
| 3 | 0.5167 | 18.334 | 13.133 | 18.379 | 18.220 | 9.577  |
| 3 | 0.5177 | 15.347 | 10.746 | 14.079 | 16.113 | 10.831 |
| 3 | 0.5187 | 12.908 | 12.394 | 11.591 | 16.979 | 9.101  |
| 3 | 0.5197 | 25.301 | 19.066 | 25.211 | 2.380  | 9.332  |
| 3 | 0.5207 | 11.546 | 11.498 | 13.227 | 11.888 | 9.736  |
| 3 | 0.5217 | 14.198 | 9.073  | 11.484 | 16.266 | 13.562 |
| 3 | 0.5227 | 15.371 | 7.895  | 11.438 | 12.893 | 9.645  |
| 3 | 0.5237 | 9.214  | 6.898  | 11.261 | 9.411  | 8.387  |
| 3 | 0.5247 | 13.043 | 14.813 | 13.519 | 19.278 | 10.670 |
| 3 | 0.5257 | 17.289 | 22.413 | 28.095 | 9.367  | 22.776 |
| 3 | 0.5267 | 18.583 | 16.582 | 16.340 | 17.394 | 14.269 |
| 3 | 0.5277 | 27.813 | 24.205 | 31.336 | 18.525 | 15.287 |
| 3 | 0.5287 | 12.429 | 6.841  | 13.227 | 18.007 | 6.788  |
| 3 | 0.5297 | 10.397 | 7.720  | 8.128  | 15.323 | 12.492 |
| 3 | 0.5307 | 20.021 | 14.337 | 17.783 | 26.237 | 21.117 |
| 3 | 0.5317 | 10.671 | 19.904 | 13.828 | 17.824 | 10.058 |
| 3 | 0.5327 | 7.499  | 13.264 | 6.142  | 11.378 | 8.926  |
| 3 | 0.5337 | 9.465  | 19.552 | 8.922  | 17.682 | 6.381  |
| 3 | 0.5347 | 10.513 | 19.488 | 16.621 | 12.257 | 7.918  |
| 3 | 0.5357 | 25.752 | 20.709 | 26.184 | 18.993 | 10.480 |
| 3 | 0.5367 | 11.872 | 9.041  | 13.318 | 9.680  | 7.728  |
| 3 | 0.5377 | 12.738 | 8.027  | 14.124 | 6.069  | 9.117  |
| 3 | 0.5387 | 11.916 | 10.506 | 7.470  | 12.394 | 10.545 |
| 3 | 0.5397 | 8.650  | 5.279  | 4.928  | 9.349  | 11.393 |
| 3 | 0.5407 | 17.683 | 11.672 | 16.435 | 9.828  | 8.850  |
| 3 | 0.5417 | 24.086 | 13.930 | 17.199 | 10.753 | 13.537 |
| 3 | 0.5427 | 5.992  | 3.068  | 1.789  | 10.237 | 14.077 |

|   |        |        |        |        |        |        |
|---|--------|--------|--------|--------|--------|--------|
| 3 | 0.5437 | 33.129 | 16.359 | 22.204 | 9.452  | 12.044 |
| 3 | 0.5447 | 12.312 | 9.355  | 9.618  | 7.587  | 12.842 |
| 3 | 0.5457 | 10.175 | 6.687  | 6.998  | 8.275  | 8.166  |
| 3 | 0.5467 | 13.374 | 6.743  | 5.946  | 14.399 | 13.208 |
| 3 | 0.5477 | 18.893 | 5.548  | 10.238 | 8.619  | 13.371 |
| 3 | 0.5487 | 8.232  | 5.786  | 5.187  | 8.107  | 9.893  |
| 3 | 0.5497 | 10.046 | 8.726  | 7.050  | 6.038  | 5.874  |
| 3 | 0.5507 | 18.789 | 19.662 | 18.647 | 15.914 | 13.765 |
| 3 | 0.5517 | 16.245 | 12.218 | 15.644 | 8.873  | 16.624 |
| 3 | 0.5527 | 11.667 | 12.768 | 13.367 | 13.066 | 13.813 |
| 3 | 0.5537 | 14.175 | 7.134  | 8.760  | 6.863  | 13.806 |
| 3 | 0.5547 | 11.937 | 7.328  | 13.783 | 7.725  | 19.032 |
| 3 | 0.5557 | 17.296 | 8.609  | 11.178 | 10.017 | 19.490 |
| 3 | 0.5567 | 29.481 | 21.170 | 25.469 | 13.473 | 19.459 |
| 3 | 0.5577 | 27.329 | 20.010 | 24.437 | 12.625 | 13.847 |
| 3 | 0.5587 | 10.941 | 7.116  | 9.009  | 9.583  | 9.905  |
| 3 | 0.5597 | 13.017 | 8.283  | 9.751  | 7.618  | 19.675 |
| 3 | 0.5607 | 26.218 | 14.577 | 22.344 | 5.897  | 9.466  |
| 3 | 0.5617 | 24.003 | 13.423 | 18.945 | 3.294  | 8.483  |
| 3 | 0.5627 | 5.017  | 4.551  | 4.355  | 3.858  | 5.644  |
| 3 | 0.5637 | 10.921 | 9.930  | 12.568 | 5.727  | 10.361 |
| 3 | 0.5647 | 13.282 | 7.436  | 9.333  | 6.217  | 9.980  |
| 3 | 0.5657 | 10.512 | 8.428  | 5.518  | 2.688  | 12.289 |
| 3 | 0.5667 | 4.315  | 5.494  | 3.345  | 7.559  | 12.460 |
| 3 | 0.5677 | 8.199  | 6.887  | 7.417  | 7.603  | 4.379  |
| 3 | 0.5687 | 30.004 | 17.789 | 26.506 | 14.985 | 21.526 |
| 3 | 0.5697 | 22.879 | 19.356 | 18.199 | 11.468 | 13.479 |
| 3 | 0.5707 | 25.189 | 16.486 | 15.850 | 11.605 | 19.247 |
| 3 | 0.5717 | 18.876 | 13.834 | 18.147 | 3.477  | 19.194 |
| 3 | 0.5727 | 10.604 | 12.660 | 9.325  | 3.241  | 17.698 |
| 3 | 0.5737 | 22.877 | 15.079 | 20.859 | 5.304  | 11.505 |
| 3 | 0.5747 | 16.638 | 14.806 | 15.326 | 4.824  | 12.489 |
| 3 | 0.5757 | 9.639  | 10.125 | 7.868  | 12.452 | 9.277  |
| 3 | 0.5767 | 12.199 | 8.465  | 5.615  | 5.703  | 18.716 |
| 3 | 0.5777 | 15.068 | 13.731 | 16.658 | 3.566  | 13.810 |
| 3 | 0.5787 | 16.396 | 11.382 | 15.657 | 10.499 | 11.702 |
| 3 | 0.5797 | 17.490 | 12.415 | 14.321 | 7.364  | 8.520  |
| 3 | 0.5807 | 22.184 | 13.746 | 11.941 | 4.077  | 7.494  |
| 3 | 0.5817 | 17.753 | 12.251 | 13.791 | 10.262 | 10.353 |
| 3 | 0.5827 | 13.770 | 15.074 | 8.231  | 5.120  | 9.242  |
| 3 | 0.5837 | 7.563  | 13.951 | 9.347  | 8.242  | 9.116  |
| 3 | 0.5847 | 15.933 | 14.322 | 12.719 | 7.343  | 11.920 |
| 3 | 0.5857 | 17.217 | 12.659 | 13.543 | 5.874  | 15.052 |
| 3 | 0.5867 | 19.515 | 15.419 | 16.249 | 7.035  | 15.484 |
| 3 | 0.5877 | 7.823  | 9.713  | 10.655 | 7.686  | 8.118  |
| 3 | 0.5887 | 12.063 | 10.493 | 8.136  | 6.685  | 4.504  |
| 3 | 0.5897 | 10.293 | 9.947  | 7.822  | 4.106  | 4.570  |
| 3 | 0.5907 | 9.579  | 15.329 | 15.847 | 6.546  | 4.261  |
| 3 | 0.5917 | 16.711 | 15.639 | 9.949  | 4.596  | 12.876 |
| 3 | 0.5927 | 14.394 | 7.422  | 7.466  | 8.010  | 16.808 |

|   |        |        |        |        |        |        |
|---|--------|--------|--------|--------|--------|--------|
| 3 | 0.5937 | 27.762 | 17.670 | 21.377 | 6.977  | 14.521 |
| 3 | 0.5947 | 15.367 | 11.214 | 12.481 | 6.840  | 8.713  |
| 3 | 0.5957 | 6.280  | 7.108  | 8.027  | 11.429 | 8.623  |
| 3 | 0.5967 | 22.560 | 15.375 | 12.529 | 9.108  | 18.707 |
| 3 | 0.5977 | 21.239 | 8.802  | 10.430 | 8.879  | 12.630 |
| 3 | 0.5987 | 32.139 | 19.313 | 21.478 | 12.995 | 4.618  |
| 3 | 0.5997 | 7.415  | 14.063 | 8.201  | 6.282  | 9.132  |
| 3 | 0.6007 | 31.302 | 24.001 | 35.936 | 7.161  | 6.808  |
| 3 | 0.6017 | 22.954 | 10.591 | 21.866 | 10.714 | 5.972  |
| 3 | 0.6027 | 14.217 | 9.446  | 8.183  | 9.033  | 24.829 |
| 3 | 0.6037 | 19.452 | 21.613 | 16.921 | 10.968 | 14.336 |
| 3 | 0.6047 | 12.418 | 8.049  | 6.731  | 9.335  | 18.734 |
| 3 | 0.6057 | 13.367 | 8.648  | 9.366  | 7.006  | 12.639 |
| 3 | 0.6067 | 3.796  | 3.219  | 5.214  | 4.982  | 6.928  |
| 3 | 0.6077 | 13.169 | 9.984  | 11.955 | 16.594 | 13.594 |
| 3 | 0.6087 | 8.475  | 7.402  | 8.700  | 8.829  | 10.052 |
| 3 | 0.6097 | 9.799  | 8.990  | 7.427  | 7.284  | 12.266 |
| 3 | 0.6107 | 13.919 | 10.879 | 7.425  | 11.041 | 13.467 |
| 3 | 0.6117 | 19.239 | 13.750 | 14.848 | 10.912 | 17.012 |
| 3 | 0.6127 | 19.129 | 21.531 | 17.091 | 12.040 | 19.101 |
| 3 | 0.6137 | 19.183 | 21.662 | 17.199 | 12.083 | 19.040 |
| 3 | 0.6147 | 17.889 | 9.615  | 12.103 | 6.340  | 14.897 |
| 3 | 0.6157 | 21.556 | 11.576 | 21.762 | 22.702 | 14.648 |
| 3 | 0.6167 | 12.817 | 11.256 | 13.274 | 8.404  | 12.638 |
| 3 | 0.6177 | 13.204 | 8.517  | 11.391 | 11.354 | 24.814 |
| 3 | 0.6187 | 11.677 | 12.477 | 9.248  | 17.811 | 16.116 |
| 3 | 0.6197 | 23.904 | 14.340 | 18.917 | 14.255 | 11.779 |
| 3 | 0.6207 | 21.041 | 12.852 | 16.973 | 13.236 | 8.824  |
| 3 | 0.6217 | 12.476 | 9.949  | 10.350 | 11.367 | 10.601 |
| 3 | 0.6227 | 14.686 | 15.128 | 13.742 | 17.356 | 7.231  |
| 3 | 0.6237 | 17.506 | 7.791  | 15.263 | 19.577 | 13.056 |
| 3 | 0.6247 | 17.700 | 21.588 | 13.401 | 25.646 | 14.961 |
| 3 | 0.6257 | 8.273  | 10.233 | 5.739  | 21.264 | 11.208 |
| 3 | 0.6267 | 6.329  | 4.264  | 3.664  | 18.677 | 17.382 |
| 3 | 0.6277 | 14.589 | 15.171 | 7.696  | 14.609 | 6.288  |
| 3 | 0.6287 | 10.688 | 12.544 | 5.730  | 14.034 | 11.557 |
| 3 | 0.6297 | 13.028 | 8.071  | 13.038 | 21.788 | 9.217  |
| 3 | 0.6307 | 17.176 | 12.819 | 17.045 | 20.131 | 11.629 |
| 3 | 0.6317 | 10.591 | 11.799 | 6.337  | 19.138 | 11.603 |
| 3 | 0.6327 | 15.471 | 10.912 | 8.408  | 27.439 | 22.138 |
| 3 | 0.6337 | 10.742 | 4.738  | 9.458  | 13.387 | 23.807 |
| 3 | 0.6347 | 6.825  | 13.867 | 6.835  | 26.579 | 16.822 |
| 3 | 0.6357 | 9.541  | 12.451 | 8.464  | 22.324 | 7.722  |
| 3 | 0.6367 | 10.590 | 14.198 | 9.109  | 12.716 | 11.556 |
| 3 | 0.6377 | 13.450 | 14.925 | 9.234  | 16.323 | 20.911 |
| 3 | 0.6387 | 16.446 | 24.249 | 11.893 | 18.298 | 13.522 |
| 3 | 0.6397 | 13.358 | 5.259  | 10.551 | 29.574 | 16.587 |
| 3 | 0.6407 | 10.950 | 3.236  | 4.262  | 19.274 | 19.123 |
| 3 | 0.6417 | 20.590 | 10.728 | 16.508 | 28.731 | 12.922 |
| 3 | 0.6427 | 22.081 | 14.109 | 15.120 | 22.921 | 15.674 |

|   |        |        |        |        |        |        |
|---|--------|--------|--------|--------|--------|--------|
| 3 | 0.6437 | 13.287 | 9.117  | 7.938  | 16.742 | 21.265 |
| 3 | 0.6447 | 13.244 | 13.747 | 8.017  | 8.833  | 8.755  |
| 3 | 0.6457 | 9.652  | 11.883 | 9.957  | 9.789  | 13.862 |
| 3 | 0.6467 | 17.284 | 14.258 | 12.173 | 14.563 | 14.240 |
| 3 | 0.6477 | 22.073 | 25.899 | 20.257 | 24.359 | 14.305 |
| 3 | 0.6487 | 16.174 | 26.866 | 17.401 | 18.157 | 15.139 |
| 3 | 0.6497 | 18.174 | 27.796 | 18.058 | 16.663 | 13.669 |
| 3 | 0.6507 | 22.743 | 23.765 | 20.801 | 22.173 | 17.338 |
| 3 | 0.6517 | 16.749 | 20.006 | 15.282 | 15.340 | 15.452 |
| 3 | 0.6527 | 13.130 | 18.370 | 11.256 | 15.863 | 13.943 |
| 3 | 0.6537 | 10.365 | 10.297 | 10.579 | 6.342  | 10.919 |
| 3 | 0.6547 | 17.848 | 13.933 | 13.355 | 15.733 | 16.411 |
| 3 | 0.6557 | 23.379 | 13.525 | 19.255 | 14.547 | 22.482 |
| 3 | 0.6567 | 14.670 | 8.794  | 13.795 | 9.528  | 13.201 |
| 3 | 0.6577 | 11.532 | 9.842  | 10.536 | 7.510  | 20.156 |
| 3 | 0.6587 | 9.407  | 11.235 | 9.738  | 19.578 | 22.324 |
| 3 | 0.6597 | 18.316 | 18.310 | 18.654 | 20.408 | 14.074 |
| 3 | 0.6607 | 9.254  | 9.552  | 13.832 | 9.596  | 8.540  |
| 3 | 0.6617 | 12.556 | 10.865 | 11.812 | 7.108  | 12.019 |
| 3 | 0.6627 | 17.705 | 23.244 | 14.701 | 16.458 | 9.986  |
| 3 | 0.6637 | 16.116 | 19.762 | 14.412 | 14.924 | 17.015 |
| 3 | 0.6647 | 14.845 | 10.340 | 12.048 | 13.306 | 12.158 |
| 3 | 0.6657 | 11.956 | 21.937 | 12.794 | 16.945 | 11.537 |
| 3 | 0.6667 | 10.034 | 8.066  | 15.554 | 21.913 | 21.576 |
| 3 | 0.6677 | 15.751 | 12.062 | 16.179 | 13.589 | 10.632 |
| 3 | 0.6687 | 15.848 | 12.142 | 13.942 | 14.941 | 21.746 |
| 3 | 0.6697 | 30.445 | 29.052 | 30.258 | 11.596 | 14.907 |
| 3 | 0.6707 | 11.543 | 18.253 | 12.331 | 11.474 | 13.303 |
| 3 | 0.6717 | 5.406  | 8.555  | 6.137  | 9.897  | 11.297 |
| 3 | 0.6727 | 6.641  | 8.149  | 9.844  | 13.573 | 9.637  |
| 3 | 0.6737 | 7.513  | 11.666 | 9.826  | 8.786  | 12.109 |
| 3 | 0.6747 | 10.986 | 15.228 | 13.732 | 8.227  | 12.194 |
| 3 | 0.6757 | 13.906 | 20.933 | 17.040 | 10.049 | 11.837 |
| 3 | 0.6767 | 8.375  | 14.938 | 13.455 | 4.583  | 13.232 |
| 3 | 0.6777 | 23.437 | 15.573 | 23.249 | 13.441 | 7.843  |
| 3 | 0.6787 | 15.439 | 17.715 | 20.126 | 8.425  | 3.812  |
| 3 | 0.6797 | 4.657  | 10.522 | 7.054  | 7.291  | 6.080  |
| 3 | 0.6807 | 8.006  | 13.582 | 9.626  | 9.033  | 4.852  |
| 3 | 0.6817 | 9.331  | 13.401 | 11.501 | 8.660  | 16.149 |
| 3 | 0.6827 | 18.026 | 10.376 | 14.227 | 12.138 | 8.929  |
| 3 | 0.6837 | 25.577 | 20.202 | 23.398 | 16.857 | 12.250 |
| 3 | 0.6847 | 14.916 | 13.751 | 15.625 | 14.647 | 7.538  |
| 3 | 0.6857 | 12.410 | 11.384 | 14.423 | 13.465 | 10.850 |
| 3 | 0.6867 | 16.052 | 13.593 | 15.697 | 15.968 | 10.875 |
| 3 | 0.6877 | 11.129 | 13.483 | 10.902 | 9.749  | 7.442  |
| 3 | 0.6887 | 9.404  | 7.935  | 8.074  | 5.461  | 11.985 |
| 3 | 0.6897 | 8.318  | 4.136  | 5.917  | 5.790  | 12.392 |
| 3 | 0.6907 | 9.940  | 4.541  | 9.431  | 10.488 | 17.918 |
| 3 | 0.6917 | 5.774  | 3.725  | 6.049  | 8.861  | 9.973  |
| 3 | 0.6927 | 8.827  | 7.647  | 7.815  | 11.426 | 9.978  |

|   |        |        |        |        |        |        |
|---|--------|--------|--------|--------|--------|--------|
| 3 | 0.6937 | 17.100 | 12.973 | 16.128 | 8.236  | 16.912 |
| 3 | 0.6947 | 21.240 | 15.485 | 18.110 | 13.341 | 12.589 |
| 3 | 0.6957 | 10.812 | 6.035  | 9.877  | 9.334  | 19.584 |
| 3 | 0.6967 | 5.294  | 5.829  | 6.054  | 7.696  | 14.263 |
| 3 | 0.6977 | 7.685  | 6.676  | 7.965  | 8.853  | 15.957 |
| 3 | 0.6987 | 6.070  | 11.034 | 6.507  | 6.116  | 5.847  |
| 3 | 0.6997 | 15.378 | 12.485 | 15.917 | 4.223  | 8.249  |
| 3 | 0.7007 | 8.606  | 7.206  | 9.405  | 13.223 | 13.631 |
| 3 | 0.7017 | 9.020  | 6.216  | 8.599  | 6.330  | 11.060 |
| 3 | 0.7027 | 5.546  | 3.336  | 4.381  | 4.776  | 8.108  |
| 3 | 0.7037 | 6.680  | 4.919  | 7.275  | 7.574  | 13.837 |
| 3 | 0.7047 | 4.517  | 6.863  | 8.311  | 8.680  | 12.256 |
| 3 | 0.7057 | 9.752  | 9.682  | 9.657  | 7.134  | 10.040 |
| 3 | 0.7067 | 9.327  | 4.313  | 7.347  | 8.775  | 13.709 |
| 3 | 0.7077 | 9.347  | 5.737  | 8.467  | 10.206 | 9.875  |
| 3 | 0.7087 | 12.763 | 10.293 | 9.637  | 10.158 | 6.665  |
| 3 | 0.7097 | 7.426  | 15.222 | 10.892 | 9.617  | 9.231  |
| 3 | 0.7107 | 8.619  | 12.493 | 13.870 | 8.022  | 12.498 |
| 3 | 0.7117 | 15.349 | 11.458 | 12.195 | 9.591  | 16.927 |
| 3 | 0.7127 | 8.189  | 8.231  | 5.961  | 8.360  | 9.960  |
| 3 | 0.7137 | 5.955  | 3.711  | 6.314  | 5.810  | 8.404  |
| 3 | 0.7147 | 4.166  | 6.309  | 8.538  | 7.588  | 9.081  |
| 3 | 0.7157 | 10.678 | 7.809  | 11.578 | 15.058 | 13.197 |
| 3 | 0.7167 | 5.494  | 9.631  | 11.748 | 5.219  | 4.581  |
| 3 | 0.7177 | 3.961  | 6.868  | 7.027  | 2.454  | 9.616  |
| 3 | 0.7187 | 6.540  | 3.306  | 5.760  | 4.181  | 14.922 |
| 3 | 0.7197 | 10.860 | 10.520 | 15.239 | 11.787 | 11.125 |
| 3 | 0.7207 | 9.178  | 6.820  | 10.082 | 8.117  | 15.847 |
| 3 | 0.7217 | 9.164  | 7.556  | 8.339  | 8.433  | 16.404 |
| 3 | 0.7227 | 6.837  | 8.634  | 8.637  | 9.466  | 15.130 |
| 3 | 0.7237 | 5.562  | 13.242 | 10.414 | 11.417 | 6.178  |
| 3 | 0.7247 | 6.991  | 7.431  | 6.177  | 10.578 | 13.509 |
| 3 | 0.7257 | 9.207  | 9.013  | 8.207  | 7.407  | 13.672 |
| 3 | 0.7267 | 7.279  | 8.591  | 8.229  | 6.842  | 11.287 |
| 3 | 0.7277 | 25.241 | 12.698 | 25.813 | 16.468 | 20.625 |
| 3 | 0.7287 | 15.170 | 11.772 | 17.689 | 13.902 | 14.618 |
| 3 | 0.7297 | 6.294  | 12.059 | 11.922 | 6.744  | 12.481 |
| 3 | 0.7307 | 5.916  | 11.901 | 8.403  | 5.647  | 12.460 |
| 3 | 0.7317 | 4.766  | 9.010  | 7.077  | 3.772  | 21.516 |
| 3 | 0.7327 | 4.895  | 6.694  | 6.779  | 3.150  | 14.975 |
| 3 | 0.7337 | 4.770  | 3.915  | 3.860  | 7.640  | 16.145 |
| 3 | 0.7347 | 7.306  | 9.436  | 9.117  | 11.342 | 15.382 |
| 3 | 0.7357 | 5.088  | 5.515  | 7.128  | 9.243  | 19.464 |
| 3 | 0.7367 | 2.711  | 5.989  | 4.144  | 7.012  | 25.489 |
| 3 | 0.7377 | 4.737  | 4.468  | 6.160  | 7.143  | 22.304 |
| 3 | 0.7387 | 8.854  | 7.212  | 10.866 | 7.961  | 13.422 |
| 3 | 0.7397 | 7.580  | 9.006  | 10.743 | 3.405  | 15.736 |
| 3 | 0.7407 | 15.537 | 19.905 | 20.513 | 9.419  | 13.189 |
| 3 | 0.7417 | 6.837  | 8.168  | 8.388  | 10.724 | 12.797 |
| 3 | 0.7427 | 11.443 | 10.450 | 10.080 | 13.688 | 24.038 |

|   |        |        |        |        |        |        |
|---|--------|--------|--------|--------|--------|--------|
| 3 | 0.7437 | 2.380  | 2.013  | 1.119  | 13.392 | 9.254  |
| 3 | 0.7447 | 8.647  | 8.142  | 5.577  | 16.070 | 12.528 |
| 3 | 0.7457 | 20.762 | 11.507 | 17.233 | 19.610 | 19.364 |
| 3 | 0.7467 | 13.376 | 11.128 | 11.904 | 9.920  | 17.173 |
| 3 | 0.7477 | 23.569 | 24.034 | 20.137 | 12.109 | 17.727 |
| 3 | 0.7487 | 14.150 | 11.200 | 14.050 | 11.088 | 15.383 |
| 3 | 0.7497 | 10.112 | 11.743 | 11.579 | 10.582 | 9.562  |
| 3 | 0.7507 | 13.877 | 16.575 | 18.639 | 13.306 | 12.460 |
| 3 | 0.7517 | 9.073  | 7.688  | 12.184 | 12.719 | 9.131  |
| 3 | 0.7527 | 17.888 | 11.249 | 15.020 | 10.352 | 9.643  |
| 3 | 0.7537 | 6.889  | 5.642  | 8.056  | 3.856  | 9.328  |
| 3 | 0.7547 | 5.954  | 8.017  | 8.003  | 10.597 | 13.550 |
| 3 | 0.7557 | 9.990  | 10.861 | 8.240  | 10.264 | 16.630 |
| 3 | 0.7567 | 7.521  | 9.550  | 8.855  | 8.735  | 12.458 |
| 3 | 0.7577 | 8.510  | 8.147  | 10.213 | 8.102  | 13.057 |
| 3 | 0.7587 | 11.994 | 13.781 | 14.393 | 15.672 | 14.038 |
| 3 | 0.7597 | 11.840 | 14.842 | 13.994 | 14.972 | 12.485 |
| 3 | 0.7607 | 29.191 | 18.917 | 21.387 | 12.056 | 12.589 |
| 3 | 0.7617 | 25.831 | 11.394 | 12.621 | 7.375  | 16.142 |
| 3 | 0.7627 | 32.110 | 13.887 | 23.490 | 17.108 | 15.008 |
| 3 | 0.7637 | 32.715 | 22.384 | 27.864 | 22.702 | 13.305 |
| 3 | 0.7647 | 6.838  | 5.554  | 6.793  | 16.443 | 22.756 |
| 3 | 0.7657 | 16.074 | 14.135 | 14.643 | 16.065 | 23.309 |
| 3 | 0.7667 | 12.544 | 9.394  | 10.947 | 8.311  | 34.291 |
| 3 | 0.7677 | 7.573  | 11.215 | 8.183  | 10.010 | 10.774 |
| 3 | 0.7687 | 9.751  | 9.495  | 7.330  | 17.239 | 17.174 |
| 3 | 0.7697 | 12.153 | 8.519  | 8.297  | 11.646 | 14.486 |
| 3 | 0.7707 | 10.837 | 17.738 | 10.163 | 12.433 | 14.196 |
| 3 | 0.7717 | 8.286  | 9.418  | 14.736 | 9.923  | 13.778 |
| 3 | 0.7727 | 8.557  | 8.293  | 10.203 | 11.188 | 11.439 |
| 3 | 0.7737 | 5.015  | 8.025  | 4.824  | 8.296  | 4.927  |
| 3 | 0.7747 | 10.074 | 10.009 | 8.251  | 3.479  | 12.613 |
| 3 | 0.7757 | 14.679 | 18.475 | 9.059  | 19.914 | 3.505  |
| 3 | 0.7767 | 5.974  | 5.658  | 5.991  | 8.923  | 15.763 |
| 3 | 0.7777 | 2.535  | 9.812  | 2.735  | 13.982 | 10.741 |
| 3 | 0.7787 | 4.325  | 11.445 | 5.754  | 12.320 | 8.891  |
| 3 | 0.7797 | 6.766  | 15.963 | 8.534  | 17.009 | 17.461 |
| 3 | 0.7807 | 9.938  | 10.986 | 9.419  | 17.619 | 15.179 |
| 3 | 0.7817 | 11.023 | 9.685  | 10.116 | 16.583 | 28.654 |
| 3 | 0.7827 | 13.357 | 8.846  | 9.901  | 14.588 | 27.320 |
| 3 | 0.7837 | 12.154 | 9.599  | 11.907 | 9.052  | 18.320 |
| 3 | 0.7847 | 14.193 | 9.829  | 10.590 | 15.303 | 24.037 |
| 3 | 0.7857 | 6.870  | 5.334  | 7.281  | 14.828 | 15.152 |
| 3 | 0.7867 | 11.806 | 4.467  | 6.247  | 10.314 | 15.425 |
| 3 | 0.7877 | 7.596  | 6.255  | 4.086  | 10.985 | 15.517 |
| 3 | 0.7887 | 15.518 | 12.577 | 8.597  | 13.504 | 22.831 |
| 3 | 0.7897 | 9.128  | 6.799  | 10.364 | 4.482  | 11.717 |
| 3 | 0.7907 | 8.328  | 8.552  | 8.564  | 7.308  | 14.137 |
| 3 | 0.7917 | 6.224  | 7.216  | 8.539  | 11.436 | 16.262 |
| 3 | 0.7927 | 11.783 | 9.871  | 7.311  | 19.092 | 27.776 |



|   |        |        |        |        |        |        |
|---|--------|--------|--------|--------|--------|--------|
| 3 | 0.7937 | 14.193 | 8.845  | 9.463  | 13.427 | 7.167  |
| 3 | 0.7947 | 5.369  | 11.156 | 4.416  | 13.785 | 23.011 |
| 3 | 0.7957 | 7.134  | 11.116 | 5.669  | 15.126 | 19.053 |
| 3 | 0.7967 | 11.312 | 16.189 | 11.950 | 10.905 | 13.920 |
| 3 | 0.7977 | 7.508  | 10.087 | 7.777  | 14.184 | 9.132  |
| 3 | 0.7987 | 7.533  | 10.139 | 7.777  | 14.209 | 8.968  |
| 3 | 0.7997 | 14.740 | 15.500 | 14.037 | 12.504 | 12.437 |
| 3 | 0.8007 | 12.524 | 14.106 | 12.467 | 21.599 | 14.868 |
| 3 | 0.8017 | 17.064 | 15.383 | 13.184 | 21.988 | 34.727 |
| 3 | 0.8027 | 7.638  | 8.549  | 6.425  | 25.767 | 33.548 |
| 3 | 0.8037 | 11.258 | 17.803 | 12.312 | 13.146 | 11.546 |
| 3 | 0.8047 | 13.884 | 17.667 | 16.196 | 13.954 | 16.154 |
| 3 | 0.8057 | 9.411  | 15.111 | 12.746 | 15.168 | 14.961 |
| 3 | 0.8067 | 13.441 | 16.594 | 11.739 | 7.248  | 9.502  |
| 3 | 0.8077 | 9.432  | 13.194 | 8.202  | 9.057  | 6.556  |
| 3 | 0.8087 | 8.179  | 10.028 | 10.149 | 17.297 | 34.663 |
| 3 | 0.8097 | 7.592  | 8.644  | 9.692  | 13.673 | 17.367 |
| 3 | 0.8107 | 6.652  | 7.599  | 10.158 | 14.730 | 18.713 |
| 3 | 0.8117 | 10.061 | 7.118  | 10.657 | 9.741  | 12.692 |
| 3 | 0.8127 | 9.668  | 12.340 | 11.388 | 8.701  | 16.989 |
| 3 | 0.8137 | 18.241 | 12.710 | 16.443 | 9.065  | 21.115 |
| 3 | 0.8147 | 11.417 | 11.889 | 8.478  | 12.201 | 23.897 |
| 3 | 0.8157 | 14.480 | 16.781 | 9.193  | 13.792 | 19.333 |
| 3 | 0.8167 | 15.040 | 16.785 | 11.924 | 13.222 | 17.927 |
| 3 | 0.8177 | 16.481 | 20.150 | 15.968 | 17.377 | 20.329 |
| 3 | 0.8187 | 25.340 | 19.642 | 23.382 | 10.889 | 21.472 |
| 3 | 0.8197 | 17.097 | 12.840 | 13.882 | 13.036 | 11.947 |
| 3 | 0.8207 | 12.008 | 14.500 | 11.746 | 16.563 | 13.750 |
| 3 | 0.8217 | 18.211 | 12.333 | 16.849 | 11.130 | 16.964 |
| 3 | 0.8227 | 13.979 | 11.276 | 16.795 | 10.738 | 15.681 |
| 3 | 0.8237 | 20.474 | 11.909 | 14.178 | 10.787 | 30.643 |
| 3 | 0.8247 | 20.470 | 11.900 | 14.192 | 10.789 | 30.669 |
| 3 | 0.8257 | 18.957 | 11.068 | 9.338  | 14.407 | 29.671 |
| 3 | 0.8267 | 13.709 | 16.005 | 7.896  | 9.900  | 22.326 |
| 3 | 0.8277 | 20.056 | 17.536 | 11.097 | 11.788 | 11.040 |
| 3 | 0.8287 | 14.134 | 15.953 | 11.847 | 18.652 | 11.238 |
| 3 | 0.8297 | 12.493 | 14.267 | 14.062 | 15.516 | 6.122  |
| 3 | 0.8307 | 16.998 | 13.921 | 13.458 | 12.577 | 15.254 |
| 3 | 0.8317 | 17.022 | 13.899 | 13.489 | 12.577 | 15.258 |
| 3 | 0.8327 | 16.017 | 16.396 | 12.537 | 9.396  | 9.730  |
| 3 | 0.8337 | 11.844 | 15.713 | 15.549 | 17.583 | 15.492 |
| 3 | 0.8347 | 15.233 | 10.988 | 15.100 | 10.850 | 12.867 |
| 3 | 0.8357 | 11.457 | 14.584 | 13.096 | 12.976 | 15.781 |
| 3 | 0.8367 | 12.316 | 12.474 | 17.947 | 12.427 | 20.951 |
| 3 | 0.8377 | 14.551 | 13.594 | 17.914 | 16.205 | 24.039 |
| 3 | 0.8387 | 18.788 | 14.708 | 17.827 | 12.907 | 31.640 |
| 3 | 0.8397 | 18.722 | 14.719 | 17.801 | 12.914 | 31.676 |
| 3 | 0.8407 | 10.294 | 16.566 | 11.005 | 16.782 | 6.148  |
| 3 | 0.8417 | 17.297 | 16.793 | 17.439 | 13.669 | 19.518 |
| 3 | 0.8427 | 12.004 | 8.098  | 12.210 | 8.948  | 7.024  |

|   |        |        |        |        |        |        |
|---|--------|--------|--------|--------|--------|--------|
| 3 | 0.8437 | 8.685  | 3.446  | 7.626  | 6.534  | 8.759  |
| 3 | 0.8447 | 10.636 | 6.038  | 8.309  | 9.915  | 18.226 |
| 3 | 0.8457 | 14.211 | 12.919 | 11.040 | 18.755 | 17.501 |
| 3 | 0.8467 | 9.042  | 8.242  | 5.672  | 9.467  | 11.905 |
| 3 | 0.8477 | 9.060  | 8.224  | 5.702  | 9.457  | 11.931 |
| 3 | 0.8487 | 9.079  | 8.206  | 5.732  | 9.448  | 11.955 |
| 3 | 0.8497 | 8.956  | 9.523  | 7.328  | 12.630 | 9.048  |
| 3 | 0.8507 | 6.767  | 6.069  | 6.034  | 4.746  | 14.476 |
| 3 | 0.8517 | 10.449 | 7.151  | 12.549 | 4.157  | 16.524 |
| 3 | 0.8527 | 14.002 | 9.366  | 15.568 | 12.987 | 15.520 |
| 3 | 0.8537 | 26.308 | 21.977 | 23.690 | 12.389 | 18.496 |
| 3 | 0.8547 | 10.440 | 7.238  | 7.641  | 2.024  | 13.393 |
| 3 | 0.8557 | 8.763  | 11.182 | 9.224  | 9.132  | 12.074 |
| 3 | 0.8567 | 3.997  | 7.670  | 5.670  | 10.071 | 12.671 |
| 3 | 0.8577 | 16.324 | 13.542 | 10.370 | 12.711 | 14.487 |
| 3 | 0.8587 | 15.574 | 14.841 | 18.217 | 8.656  | 13.614 |
| 3 | 0.8597 | 14.822 | 11.742 | 13.255 | 11.152 | 24.547 |
| 3 | 0.8607 | 15.116 | 13.500 | 22.400 | 5.305  | 24.588 |
| 3 | 0.8617 | 9.422  | 10.820 | 15.915 | 14.523 | 23.294 |
| 3 | 0.8627 | 7.068  | 5.115  | 4.749  | 3.983  | 12.751 |
| 3 | 0.8637 | 17.488 | 15.605 | 14.524 | 9.136  | 30.599 |
| 3 | 0.8647 | 20.107 | 18.536 | 13.453 | 6.967  | 24.452 |
| 3 | 0.8657 | 16.577 | 11.453 | 13.000 | 7.316  | 19.274 |
| 3 | 0.8667 | 18.598 | 16.933 | 18.366 | 5.023  | 12.118 |
| 3 | 0.8677 | 27.241 | 20.823 | 21.044 | 9.500  | 16.554 |
| 3 | 0.8687 | 17.184 | 17.115 | 14.847 | 9.996  | 16.376 |
| 3 | 0.8697 | 9.240  | 7.642  | 10.323 | 9.076  | 16.732 |
| 3 | 0.8707 | 15.672 | 18.985 | 18.770 | 6.483  | 12.798 |
| 3 | 0.8717 | 15.716 | 18.965 | 18.914 | 6.429  | 12.912 |
| 3 | 0.8727 | 9.906  | 10.005 | 12.404 | 6.718  | 12.876 |
| 3 | 0.8737 | 9.307  | 6.361  | 4.440  | 6.318  | 7.831  |
| 3 | 0.8747 | 7.783  | 10.488 | 8.512  | 9.861  | 9.266  |
| 3 | 0.8757 | 14.863 | 7.302  | 12.061 | 19.051 | 16.215 |
| 3 | 0.8767 | 8.456  | 7.531  | 8.476  | 22.637 | 12.393 |
| 3 | 0.8777 | 17.613 | 18.244 | 16.785 | 10.548 | 14.281 |
| 3 | 0.8787 | 13.927 | 12.511 | 16.192 | 14.017 | 8.784  |
| 3 | 0.8797 | 16.221 | 12.201 | 16.263 | 10.069 | 13.905 |
| 3 | 0.8807 | 22.515 | 13.010 | 26.881 | 11.016 | 27.958 |
| 3 | 0.8817 | 18.743 | 14.142 | 12.736 | 8.538  | 11.255 |
| 3 | 0.8827 | 5.908  | 5.589  | 7.506  | 3.103  | 3.876  |
| 3 | 0.8837 | 12.179 | 19.168 | 18.844 | 8.138  | 18.778 |
| 3 | 0.8847 | 12.181 | 19.161 | 18.864 | 8.099  | 18.491 |
| 3 | 0.8857 | 26.479 | 19.945 | 24.626 | 9.608  | 27.020 |
| 3 | 0.8867 | 14.938 | 10.105 | 14.097 | 8.357  | 20.652 |
| 3 | 0.8877 | 15.681 | 10.534 | 13.240 | 3.207  | 15.305 |
| 3 | 0.8887 | 15.205 | 18.312 | 18.932 | 10.228 | 19.984 |
| 3 | 0.8897 | 11.162 | 11.258 | 14.086 | 7.739  | 14.201 |
| 3 | 0.8907 | 7.346  | 10.254 | 10.509 | 11.101 | 14.162 |
| 3 | 0.8917 | 6.845  | 10.934 | 13.178 | 7.248  | 6.546  |
| 3 | 0.8927 | 5.982  | 5.759  | 7.989  | 11.385 | 18.715 |

|   |        |        |        |        |        |        |
|---|--------|--------|--------|--------|--------|--------|
| 3 | 0.8937 | 5.111  | 6.269  | 6.471  | 10.364 | 9.570  |
| 3 | 0.8947 | 16.460 | 22.956 | 22.490 | 15.517 | 19.037 |
| 3 | 0.8957 | 16.445 | 22.932 | 22.447 | 15.538 | 18.976 |
| 3 | 0.8967 | 24.647 | 18.721 | 27.332 | 17.135 | 15.469 |
| 3 | 0.8977 | 10.586 | 8.371  | 15.601 | 16.207 | 8.612  |
| 3 | 0.8987 | 10.604 | 8.399  | 15.605 | 16.255 | 8.649  |
| 3 | 0.8997 | 10.622 | 8.425  | 15.609 | 16.303 | 8.686  |
| 3 | 0.9007 | 8.626  | 5.964  | 6.992  | 9.369  | 16.798 |
| 3 | 0.9017 | 13.265 | 15.676 | 16.215 | 10.296 | 25.776 |
| 3 | 0.9027 | 11.505 | 7.644  | 11.272 | 5.342  | 3.115  |
| 3 | 0.9037 | 12.208 | 6.528  | 10.669 | 3.375  | 2.352  |
| 3 | 0.9047 | 13.309 | 5.381  | 12.880 | 11.543 | 11.939 |
| 3 | 0.9057 | 4.847  | 0.799  | 4.174  | 11.710 | 14.898 |
| 3 | 0.9067 | 13.875 | 9.302  | 10.792 | 10.356 | 16.102 |
| 3 | 0.9077 | 10.884 | 11.148 | 12.326 | 10.484 | 16.691 |
| 3 | 0.9087 | 12.962 | 10.849 | 15.459 | 4.756  | 13.381 |
| 3 | 0.9097 | 12.482 | 10.561 | 12.974 | 9.085  | 7.813  |
| 3 | 0.9107 | 19.808 | 17.821 | 16.227 | 6.271  | 16.163 |
| 3 | 0.9117 | 12.494 | 14.918 | 10.128 | 9.567  | 17.816 |
| 3 | 0.9127 | 15.748 | 17.248 | 15.208 | 14.742 | 20.034 |
| 3 | 0.9137 | 11.771 | 16.371 | 15.572 | 16.919 | 19.544 |
| 3 | 0.9147 | 4.525  | 2.437  | 4.363  | 1.468  | 10.366 |
| 3 | 0.9157 | 7.795  | 7.254  | 5.355  | 4.445  | 12.119 |
| 3 | 0.9167 | 2.894  | 4.760  | 3.933  | 7.040  | 10.766 |
| 3 | 0.9177 | 7.839  | 9.236  | 7.940  | 9.458  | 4.515  |
| 3 | 0.9187 | 2.608  | 2.981  | 2.777  | 1.415  | 1.703  |
| 3 | 0.9197 | 0.582  | 0.005  | 0.019  | 0.068  | 0.782  |
| 3 | 0.9207 | 10.410 | 8.705  | 4.421  | 4.073  | 6.736  |
| 3 | 0.9217 | 12.251 | 10.672 | 7.036  | 4.103  | 7.912  |
| 3 | 0.9227 | 13.381 | 6.317  | 5.874  | 11.605 | 5.635  |
| 3 | 0.9237 | 9.198  | 10.127 | 5.173  | 7.806  | 12.089 |
| 3 | 0.9247 | 15.446 | 13.225 | 15.648 | 15.907 | 17.115 |
| 3 | 0.9257 | 9.946  | 7.351  | 14.921 | 13.754 | 19.630 |
| 3 | 0.9267 | 7.999  | 8.735  | 8.475  | 10.902 | 9.513  |
| 3 | 0.9277 | 13.362 | 3.508  | 10.783 | 9.962  | 9.691  |
| 3 | 0.9287 | 2.540  | 1.091  | 1.519  | 6.681  | 7.121  |
| 3 | 0.9297 | 2.123  | 1.026  | 1.432  | 5.182  | 3.394  |
| 3 | 0.9307 | 3.489  | 3.763  | 2.952  | 3.533  | 2.807  |
| 3 | 0.9317 | 6.036  | 4.298  | 3.912  | 7.432  | 12.733 |
| 3 | 0.9327 | 5.697  | 6.224  | 4.536  | 6.267  | 20.382 |
| 3 | 0.9337 | 14.409 | 9.659  | 9.415  | 8.149  | 23.536 |
| 3 | 0.9347 | 11.102 | 6.343  | 6.938  | 5.871  | 22.592 |
| 3 | 0.9357 | 21.921 | 13.095 | 19.554 | 14.670 | 14.327 |
| 3 | 0.9367 | 10.664 | 8.387  | 7.623  | 6.125  | 15.768 |
| 3 | 0.9377 | 8.472  | 6.320  | 9.388  | 8.407  | 10.865 |
| 3 | 0.9387 | 15.224 | 12.407 | 14.215 | 9.530  | 17.019 |
| 3 | 0.9397 | 7.767  | 6.114  | 8.998  | 5.402  | 14.602 |
| 3 | 0.9407 | 12.011 | 9.380  | 10.866 | 20.542 | 23.875 |
| 3 | 0.9417 | 8.440  | 6.173  | 7.451  | 7.128  | 11.979 |
| 3 | 0.9427 | 7.904  | 4.024  | 5.398  | 8.980  | 14.943 |

|   |        |        |        |        |        |        |
|---|--------|--------|--------|--------|--------|--------|
| 3 | 0.9437 | 7.558  | 4.731  | 7.381  | 6.662  | 23.709 |
| 3 | 0.9447 | 7.940  | 5.579  | 6.113  | 5.446  | 14.603 |
| 3 | 0.9457 | 8.969  | 10.677 | 4.140  | 7.136  | 18.631 |
| 3 | 0.9467 | 15.290 | 13.718 | 12.314 | 13.610 | 14.567 |
| 3 | 0.9477 | 17.498 | 8.163  | 8.813  | 13.811 | 25.625 |
| 3 | 0.9487 | 19.613 | 14.067 | 11.119 | 16.848 | 34.253 |
| 3 | 0.9497 | 10.187 | 10.254 | 9.444  | 14.351 | 27.164 |
| 3 | 0.9507 | 15.015 | 11.695 | 8.765  | 12.706 | 34.837 |
| 3 | 0.9517 | 15.256 | 12.991 | 10.464 | 11.830 | 16.931 |
| 3 | 0.9527 | 12.637 | 12.285 | 9.636  | 9.299  | 23.926 |
| 3 | 0.9537 | 6.521  | 6.026  | 8.533  | 6.441  | 8.241  |
| 3 | 0.9547 | 12.886 | 6.593  | 9.361  | 9.518  | 13.686 |
| 3 | 0.9557 | 12.789 | 9.364  | 9.275  | 9.320  | 19.559 |
| 3 | 0.9567 | 13.145 | 7.579  | 8.749  | 6.390  | 18.437 |
| 3 | 0.9577 | 13.189 | 7.651  | 8.791  | 6.237  | 18.374 |
| 3 | 0.9587 | 5.163  | 7.903  | 8.592  | 6.208  | 13.882 |
| 3 | 0.9597 | 5.775  | 10.471 | 10.353 | 7.271  | 17.474 |
| 3 | 0.9607 | 5.766  | 7.584  | 9.427  | 4.903  | 29.214 |
| 3 | 0.9617 | 8.404  | 9.240  | 11.501 | 6.672  | 22.780 |
| 3 | 0.9627 | 6.219  | 10.649 | 10.441 | 13.698 | 13.326 |
| 3 | 0.9637 | 4.713  | 10.363 | 10.276 | 18.025 | 11.677 |
| 3 | 0.9647 | 11.043 | 8.640  | 9.834  | 6.934  | 10.180 |
| 3 | 0.9657 | 7.728  | 8.793  | 11.780 | 7.625  | 8.698  |
| 3 | 0.9667 | 8.441  | 6.760  | 7.469  | 10.777 | 13.436 |
| 3 | 0.9677 | 21.724 | 11.973 | 13.861 | 11.562 | 19.604 |
| 3 | 0.9687 | 7.765  | 11.381 | 11.156 | 13.171 | 11.960 |
| 3 | 0.9697 | 5.098  | 7.188  | 8.670  | 10.232 | 6.452  |
| 3 | 0.9707 | 7.683  | 9.356  | 12.394 | 8.112  | 12.012 |
| 3 | 0.9717 | 7.792  | 10.252 | 13.812 | 9.695  | 14.178 |
| 3 | 0.9727 | 7.580  | 7.123  | 7.851  | 9.801  | 15.828 |
| 3 | 0.9737 | 12.697 | 13.255 | 13.184 | 21.563 | 22.930 |
| 3 | 0.9747 | 10.377 | 11.773 | 14.954 | 6.996  | 14.483 |
| 3 | 0.9757 | 8.688  | 6.494  | 8.963  | 4.533  | 6.880  |
| 3 | 0.9767 | 5.453  | 6.319  | 7.730  | 8.249  | 8.356  |
| 3 | 0.9777 | 9.900  | 12.802 | 9.958  | 12.289 | 20.631 |
| 3 | 0.9787 | 9.603  | 11.550 | 9.638  | 8.937  | 11.798 |
| 3 | 0.9797 | 7.798  | 9.649  | 5.220  | 4.908  | 8.711  |
| 3 | 0.9807 | 9.783  | 11.837 | 12.185 | 16.064 | 32.718 |
| 3 | 0.9817 | 15.657 | 13.634 | 10.807 | 9.699  | 17.814 |
| 3 | 0.9827 | 6.187  | 9.109  | 5.144  | 8.267  | 10.329 |
| 3 | 0.9837 | 5.257  | 10.886 | 9.849  | 6.482  | 5.973  |
| 3 | 0.9847 | 12.200 | 11.438 | 11.429 | 11.569 | 10.993 |
| 3 | 0.9857 | 19.688 | 9.749  | 12.426 | 10.517 | 15.634 |
| 3 | 0.9867 | 13.190 | 9.013  | 10.243 | 15.913 | 22.628 |
| 3 | 0.9877 | 19.107 | 12.925 | 15.639 | 14.761 | 19.470 |
| 3 | 0.9887 | 16.647 | 12.456 | 16.117 | 18.640 | 18.262 |
| 3 | 0.9897 | 7.876  | 7.884  | 10.898 | 9.708  | 10.602 |
| 3 | 0.9907 | 12.686 | 15.182 | 16.890 | 11.466 | 12.244 |
| 3 | 0.9917 | 6.351  | 11.716 | 7.729  | 17.563 | 9.392  |
| 3 | 0.9927 | 10.366 | 12.184 | 10.798 | 22.273 | 12.956 |

|   |        |        |        |        |        |        |
|---|--------|--------|--------|--------|--------|--------|
| 3 | 0.9937 | 15.009 | 9.805  | 11.107 | 14.527 | 13.406 |
| 3 | 0.9947 | 7.956  | 11.412 | 14.878 | 11.902 | 19.103 |
| 3 | 0.9957 | 13.042 | 13.544 | 16.906 | 17.364 | 10.438 |
| 3 | 0.9967 | 6.016  | 8.186  | 8.254  | 15.916 | 12.544 |
| 3 | 0.9977 | 7.471  | 6.598  | 10.324 | 10.049 | 9.048  |
| 3 | 0.9987 | 15.540 | 13.169 | 16.165 | 9.925  | 20.357 |
| 3 | 0.9997 | 11.877 | 6.453  | 10.819 | 13.244 | 13.143 |
| 3 | 1.0007 | 6.730  | 6.314  | 8.229  | 14.851 | 17.514 |
| 3 | 1.0017 | 5.017  | 4.986  | 3.501  | 3.569  | 14.062 |
| 3 | 1.0027 | 12.185 | 10.709 | 13.076 | 13.049 | 18.716 |
| 3 | 1.0037 | 13.610 | 11.926 | 19.979 | 23.143 | 11.533 |
| 3 | 1.0047 | 11.335 | 12.771 | 18.567 | 15.248 | 15.753 |
| 3 | 1.0057 | 15.762 | 17.348 | 19.963 | 11.479 | 19.888 |
| 3 | 1.0067 | 13.634 | 12.647 | 19.570 | 9.439  | 8.400  |
| 3 | 1.0077 | 13.099 | 15.584 | 12.503 | 9.947  | 17.062 |
| 3 | 1.0087 | 12.538 | 13.615 | 14.020 | 13.116 | 6.952  |
| 3 | 1.0097 | 11.221 | 8.555  | 12.288 | 6.120  | 11.848 |
| 3 | 1.0107 | 8.713  | 13.166 | 14.498 | 22.222 | 19.421 |
| 3 | 1.0117 | 11.163 | 14.095 | 14.246 | 18.893 | 12.608 |
| 3 | 1.0127 | 10.939 | 11.591 | 13.931 | 7.796  | 1.726  |
| 3 | 1.0137 | 5.619  | 2.343  | 3.239  | 7.851  | 8.748  |
| 3 | 1.0147 | 9.621  | 6.428  | 11.124 | 12.574 | 11.256 |
| 3 | 1.0157 | 9.174  | 7.647  | 8.426  | 19.457 | 20.310 |
| 3 | 1.0167 | 12.299 | 12.879 | 9.893  | 8.233  | 14.362 |
| 3 | 1.0177 | 13.041 | 7.568  | 10.284 | 16.232 | 14.308 |
| 3 | 1.0187 | 18.226 | 14.552 | 11.474 | 18.157 | 19.611 |
| 3 | 1.0197 | 15.848 | 13.865 | 7.263  | 9.727  | 15.949 |
| 3 | 1.0207 | 12.896 | 10.128 | 10.241 | 11.501 | 9.596  |
| 3 | 1.0217 | 15.412 | 14.363 | 11.233 | 9.484  | 11.073 |
| 3 | 1.0227 | 15.276 | 12.336 | 10.932 | 20.233 | 16.613 |
| 3 | 1.0237 | 15.427 | 17.541 | 16.916 | 14.592 | 12.932 |
| 3 | 1.0247 | 14.739 | 20.577 | 16.552 | 25.879 | 20.908 |
| 3 | 1.0257 | 6.073  | 5.516  | 6.306  | 12.404 | 7.992  |
| 3 | 1.0267 | 9.785  | 10.057 | 8.942  | 10.569 | 6.669  |
| 3 | 1.0277 | 9.467  | 7.169  | 8.727  | 16.103 | 13.513 |
| 3 | 1.0287 | 12.315 | 13.103 | 16.149 | 19.167 | 19.842 |
| 3 | 1.0297 | 11.252 | 12.098 | 11.128 | 15.804 | 16.767 |
| 3 | 1.0307 | 12.424 | 16.906 | 15.199 | 20.189 | 17.141 |
| 3 | 1.0317 | 12.079 | 11.511 | 12.481 | 20.774 | 24.558 |
| 3 | 1.0327 | 13.950 | 9.457  | 11.673 | 19.309 | 12.503 |
| 3 | 1.0337 | 19.471 | 23.168 | 18.625 | 22.080 | 19.056 |
| 3 | 1.0347 | 15.025 | 18.926 | 11.688 | 20.479 | 23.679 |
| 3 | 1.0357 | 13.375 | 16.378 | 12.658 | 11.921 | 15.111 |
| 3 | 1.0367 | 16.284 | 15.922 | 13.005 | 15.119 | 21.006 |
| 3 | 1.0377 | 12.586 | 6.605  | 11.023 | 10.706 | 9.692  |
| 3 | 1.0387 | 15.454 | 7.612  | 5.568  | 28.291 | 24.335 |
| 3 | 1.0397 | 17.662 | 9.263  | 7.852  | 18.418 | 15.624 |
| 3 | 1.0407 | 16.051 | 12.206 | 10.866 | 17.462 | 22.045 |
| 3 | 1.0417 | 19.080 | 11.299 | 11.085 | 19.772 | 18.294 |
| 3 | 1.0427 | 17.090 | 16.618 | 15.133 | 13.805 | 8.826  |

|   |        |        |        |        |        |        |
|---|--------|--------|--------|--------|--------|--------|
| 3 | 1.0437 | 13.978 | 7.727  | 7.296  | 6.051  | 14.183 |
| 3 | 1.0447 | 11.147 | 7.902  | 5.992  | 11.036 | 8.359  |
| 3 | 1.0457 | 13.350 | 13.445 | 11.096 | 19.955 | 24.056 |
| 3 | 1.0467 | 16.340 | 13.649 | 16.023 | 25.202 | 34.201 |
| 3 | 1.0477 | 14.129 | 8.593  | 3.575  | 13.824 | 26.692 |
| 3 | 1.0487 | 15.730 | 5.647  | 5.465  | 16.398 | 18.311 |
| 3 | 1.0497 | 14.787 | 6.201  | 7.132  | 4.517  | 13.683 |
| 3 | 1.0507 | 19.828 | 20.411 | 21.450 | 14.470 | 19.206 |
| 3 | 1.0517 | 13.667 | 12.132 | 12.424 | 12.291 | 9.056  |
| 3 | 1.0527 | 26.289 | 23.380 | 22.704 | 17.198 | 20.691 |
| 3 | 1.0537 | 30.347 | 25.010 | 27.262 | 19.621 | 15.476 |
| 3 | 1.0547 | 29.560 | 21.889 | 21.468 | 24.408 | 21.132 |
| 3 | 1.0557 | 29.611 | 21.886 | 21.486 | 24.230 | 21.141 |
| 3 | 1.0567 | 14.251 | 10.550 | 12.209 | 16.443 | 17.137 |
| 3 | 1.0577 | 11.955 | 13.031 | 12.548 | 14.306 | 4.900  |
| 3 | 1.0587 | 21.987 | 14.625 | 15.981 | 10.806 | 15.699 |
| 3 | 1.0597 | 12.444 | 13.718 | 9.121  | 12.268 | 16.674 |
| 3 | 1.0607 | 28.396 | 10.896 | 12.729 | 16.189 | 20.635 |
| 3 | 1.0617 | 27.969 | 16.831 | 21.568 | 13.015 | 17.833 |
| 3 | 1.0627 | 26.648 | 15.525 | 15.837 | 15.231 | 22.312 |
| 3 | 1.0637 | 16.126 | 14.648 | 12.099 | 13.707 | 25.549 |
| 3 | 1.0647 | 12.924 | 15.263 | 9.886  | 9.032  | 14.494 |
| 3 | 1.0657 | 9.511  | 14.555 | 5.833  | 7.153  | 8.796  |
| 3 | 1.0667 | 18.880 | 20.356 | 13.087 | 10.700 | 18.433 |
| 3 | 1.0677 | 16.371 | 18.239 | 16.226 | 15.743 | 12.026 |
| 3 | 1.0687 | 30.670 | 19.196 | 16.997 | 22.687 | 10.304 |
| 3 | 1.0697 | 29.408 | 24.371 | 29.700 | 30.533 | 18.159 |
| 3 | 1.0707 | 22.849 | 18.316 | 22.080 | 20.138 | 19.590 |
| 3 | 1.0717 | 22.253 | 19.945 | 19.215 | 23.435 | 35.399 |
| 3 | 1.0727 | 29.804 | 26.698 | 28.183 | 16.898 | 22.529 |
| 3 | 1.0737 | 21.346 | 13.719 | 15.494 | 12.098 | 10.900 |
| 3 | 1.0747 | 16.040 | 18.905 | 16.883 | 17.482 | 23.544 |
| 3 | 1.0757 | 21.057 | 23.251 | 28.612 | 18.849 | 13.390 |
| 3 | 1.0767 | 13.521 | 13.616 | 10.394 | 25.762 | 14.453 |
| 3 | 1.0777 | 32.205 | 23.262 | 18.859 | 26.054 | 22.555 |
| 3 | 1.0787 | 29.930 | 30.214 | 23.847 | 19.319 | 17.480 |
| 3 | 1.0797 | 29.436 | 19.841 | 24.474 | 24.196 | 17.206 |
| 3 | 1.0807 | 29.655 | 17.516 | 24.922 | 15.917 | 11.922 |
| 3 | 1.0817 | 17.001 | 15.180 | 20.508 | 11.279 | 8.211  |
| 3 | 1.0827 | 18.526 | 16.776 | 16.184 | 9.284  | 13.395 |
| 3 | 1.0837 | 17.325 | 13.582 | 16.732 | 16.022 | 14.886 |
| 3 | 1.0847 | 13.026 | 10.195 | 13.696 | 8.893  | 6.446  |
| 3 | 1.0857 | 19.375 | 19.985 | 16.693 | 26.368 | 15.037 |
| 3 | 1.0867 | 21.496 | 11.300 | 12.880 | 16.031 | 8.339  |
| 3 | 1.0877 | 14.319 | 12.586 | 8.946  | 8.330  | 4.849  |
| 3 | 1.0887 | 12.965 | 13.060 | 14.668 | 11.867 | 14.886 |
| 3 | 1.0897 | 13.042 | 7.662  | 11.760 | 11.661 | 8.897  |
| 3 | 1.0907 | 27.144 | 20.894 | 17.830 | 28.122 | 27.935 |
| 3 | 1.0917 | 18.490 | 12.267 | 11.782 | 21.530 | 23.336 |
| 3 | 1.0927 | 12.968 | 12.623 | 8.474  | 8.042  | 10.715 |

|   |        |        |        |        |        |        |
|---|--------|--------|--------|--------|--------|--------|
| 3 | 1.0937 | 10.531 | 5.658  | 11.358 | 9.460  | 6.424  |
| 3 | 1.0947 | 21.032 | 12.315 | 16.741 | 16.243 | 10.078 |
| 3 | 1.0957 | 14.709 | 9.464  | 10.442 | 11.150 | 10.899 |
| 3 | 1.0967 | 24.550 | 18.883 | 18.296 | 19.613 | 18.719 |
| 3 | 1.0977 | 13.771 | 12.271 | 9.927  | 22.004 | 21.738 |
| 3 | 1.0987 | 15.953 | 12.409 | 14.244 | 18.106 | 17.688 |
| 3 | 1.0997 | 12.962 | 8.575  | 12.712 | 14.355 | 12.820 |
| 3 | 1.1007 | 9.801  | 6.901  | 6.893  | 10.617 | 8.849  |
| 3 | 1.1017 | 18.709 | 15.646 | 19.293 | 15.760 | 11.872 |
| 3 | 1.1027 | 14.278 | 19.627 | 16.847 | 21.796 | 12.880 |
| 3 | 1.1037 | 12.718 | 10.503 | 15.929 | 15.638 | 7.642  |
| 3 | 1.1047 | 17.571 | 11.910 | 14.212 | 26.975 | 13.844 |
| 3 | 1.1057 | 17.398 | 17.680 | 20.857 | 21.632 | 15.283 |
| 3 | 1.1067 | 20.808 | 23.575 | 30.533 | 13.471 | 9.462  |
| 3 | 1.1077 | 16.130 | 20.745 | 26.238 | 8.203  | 9.051  |
| 3 | 1.1087 | 12.350 | 11.895 | 8.846  | 8.792  | 13.919 |
| 3 | 1.1097 | 21.414 | 16.991 | 21.665 | 12.465 | 15.203 |
| 3 | 1.1107 | 15.749 | 20.607 | 22.714 | 11.583 | 11.490 |
| 3 | 1.1117 | 20.499 | 19.306 | 19.740 | 13.135 | 15.383 |
| 3 | 1.1127 | 14.798 | 14.155 | 15.284 | 14.767 | 12.071 |
| 3 | 1.1137 | 9.249  | 14.285 | 11.960 | 19.884 | 11.654 |
| 3 | 1.1147 | 7.775  | 12.334 | 10.216 | 14.891 | 7.370  |
| 3 | 1.1157 | 8.556  | 15.130 | 14.343 | 25.822 | 11.762 |
| 3 | 1.1167 | 18.896 | 12.851 | 20.471 | 15.204 | 12.265 |
| 3 | 1.1177 | 15.166 | 17.064 | 23.785 | 21.381 | 13.991 |
| 3 | 1.1187 | 17.656 | 11.479 | 11.983 | 17.593 | 18.711 |
| 3 | 1.1197 | 28.021 | 17.834 | 27.841 | 21.468 | 20.804 |
| 3 | 1.1207 | 17.272 | 12.076 | 12.560 | 16.280 | 19.367 |
| 3 | 1.1217 | 28.100 | 23.443 | 31.246 | 21.826 | 19.641 |
| 3 | 1.1227 | 17.950 | 10.546 | 23.073 | 24.117 | 12.780 |
| 3 | 1.1237 | 14.735 | 9.511  | 16.104 | 20.568 | 12.210 |
| 3 | 1.1247 | 18.525 | 11.821 | 16.943 | 23.366 | 27.787 |
| 3 | 1.1257 | 19.037 | 10.403 | 21.235 | 11.362 | 22.299 |
| 3 | 1.1267 | 13.970 | 13.222 | 19.438 | 17.154 | 21.643 |
| 3 | 1.1277 | 25.550 | 16.039 | 25.497 | 16.213 | 12.051 |
| 3 | 1.1287 | 10.751 | 6.373  | 10.549 | 13.313 | 7.375  |
| 3 | 1.1297 | 16.534 | 13.424 | 17.017 | 17.774 | 12.790 |
| 3 | 1.1307 | 9.786  | 8.275  | 9.859  | 21.303 | 11.083 |
| 3 | 1.1317 | 12.737 | 9.770  | 15.339 | 25.054 | 6.700  |
| 3 | 1.1327 | 19.430 | 12.607 | 18.117 | 21.162 | 17.848 |
| 3 | 1.1337 | 21.311 | 23.397 | 26.608 | 24.782 | 17.447 |
| 3 | 1.1347 | 10.355 | 8.754  | 13.758 | 17.373 | 5.277  |
| 3 | 1.1357 | 14.505 | 13.884 | 19.463 | 25.502 | 9.017  |
| 3 | 1.1367 | 18.353 | 8.819  | 15.837 | 25.314 | 15.202 |
| 3 | 1.1377 | 15.481 | 16.033 | 19.621 | 29.310 | 9.779  |
| 3 | 1.1387 | 16.521 | 18.359 | 24.399 | 26.784 | 18.519 |
| 3 | 1.1397 | 14.210 | 9.677  | 16.374 | 19.644 | 19.446 |
| 3 | 1.1407 | 17.298 | 18.257 | 15.328 | 11.763 | 18.644 |
| 3 | 1.1417 | 28.476 | 13.733 | 23.201 | 17.009 | 17.544 |
| 3 | 1.1427 | 25.551 | 16.511 | 25.562 | 25.713 | 12.554 |

|   |        |        |        |        |        |        |
|---|--------|--------|--------|--------|--------|--------|
| 3 | 1.1437 | 25.457 | 16.670 | 25.376 | 26.424 | 12.593 |
| 3 | 1.1447 | 28.550 | 22.593 | 27.364 | 20.722 | 11.198 |
| 3 | 1.1457 | 23.038 | 16.284 | 17.260 | 18.655 | 16.689 |
| 3 | 1.1467 | 28.247 | 15.995 | 20.342 | 24.868 | 21.849 |
| 3 | 1.1477 | 15.613 | 13.751 | 16.971 | 27.352 | 15.258 |
| 3 | 1.1487 | 11.310 | 7.268  | 7.491  | 15.702 | 8.611  |
| 3 | 1.1497 | 10.214 | 6.682  | 10.160 | 18.152 | 13.035 |
| 3 | 1.1507 | 16.440 | 13.467 | 11.989 | 18.244 | 4.620  |
| 3 | 1.1517 | 9.462  | 13.665 | 13.064 | 23.731 | 20.760 |
| 3 | 1.1527 | 10.133 | 13.933 | 12.495 | 23.252 | 16.509 |
| 3 | 1.1537 | 8.745  | 10.973 | 7.568  | 18.767 | 14.850 |
| 3 | 1.1547 | 8.746  | 10.937 | 7.601  | 18.562 | 14.699 |
| 3 | 1.1557 | 17.126 | 16.360 | 17.750 | 14.340 | 15.711 |
| 3 | 1.1567 | 15.095 | 12.227 | 14.328 | 19.432 | 16.381 |
| 3 | 1.1577 | 15.253 | 8.105  | 12.356 | 21.639 | 15.575 |
| 3 | 1.1587 | 15.167 | 8.015  | 12.298 | 21.376 | 15.471 |
| 3 | 1.1597 | 20.434 | 11.803 | 14.638 | 22.265 | 17.159 |
| 3 | 1.1607 | 20.909 | 12.052 | 18.396 | 23.712 | 20.148 |
| 3 | 1.1617 | 18.064 | 16.253 | 16.098 | 22.304 | 7.868  |
| 3 | 1.1627 | 12.564 | 11.189 | 11.675 | 20.246 | 16.719 |
| 3 | 1.1637 | 13.662 | 9.072  | 12.734 | 14.450 | 10.764 |
| 3 | 1.1647 | 10.678 | 3.775  | 7.650  | 20.307 | 12.110 |
| 3 | 1.1657 | 10.952 | 6.194  | 11.470 | 15.645 | 11.079 |
| 3 | 1.1667 | 13.126 | 9.380  | 17.020 | 20.304 | 13.764 |
| 3 | 1.1677 | 1.669  | 1.207  | 2.259  | 0.001  | 0.021  |
| 4 | 0.0002 | 0.000  | 0.000  | 0.000  | 0.000  | 0.000  |
| 4 | 0.0012 | 10.970 | 14.138 | 12.645 | 21.448 | 27.846 |
| 4 | 0.0022 | 7.484  | 11.196 | 9.800  | 22.008 | 24.932 |
| 4 | 0.0032 | 10.342 | 12.309 | 12.930 | 15.545 | 14.545 |
| 4 | 0.0042 | 3.724  | 5.801  | 3.324  | 15.703 | 8.211  |
| 4 | 0.0052 | 7.268  | 5.213  | 6.597  | 14.759 | 14.103 |
| 4 | 0.0062 | 6.891  | 5.684  | 5.433  | 14.883 | 22.741 |
| 4 | 0.0072 | 15.426 | 3.642  | 14.105 | 33.310 | 43.966 |
| 4 | 0.0082 | 13.257 | 8.745  | 13.686 | 22.156 | 28.456 |
| 4 | 0.0092 | 11.352 | 13.750 | 8.213  | 17.944 | 14.236 |
| 4 | 0.0102 | 5.979  | 7.064  | 7.947  | 20.985 | 21.776 |
| 4 | 0.0112 | 11.546 | 9.247  | 11.679 | 20.446 | 21.811 |
| 4 | 0.0122 | 11.515 | 7.362  | 11.421 | 23.077 | 32.227 |
| 4 | 0.0132 | 17.952 | 12.029 | 13.388 | 24.285 | 28.752 |
| 4 | 0.0142 | 14.704 | 11.939 | 12.544 | 16.875 | 26.258 |
| 4 | 0.0152 | 6.736  | 6.973  | 11.805 | 16.952 | 26.000 |
| 4 | 0.0162 | 7.401  | 8.727  | 5.584  | 17.076 | 15.904 |
| 4 | 0.0172 | 11.708 | 12.910 | 9.584  | 26.355 | 22.128 |
| 4 | 0.0182 | 8.923  | 8.233  | 6.652  | 18.503 | 28.292 |
| 4 | 0.0192 | 10.940 | 10.046 | 12.048 | 8.532  | 10.735 |
| 4 | 0.0202 | 11.276 | 14.279 | 8.320  | 21.280 | 19.970 |
| 4 | 0.0212 | 3.900  | 3.547  | 4.662  | 14.884 | 13.294 |
| 4 | 0.0222 | 20.142 | 15.851 | 17.900 | 11.787 | 14.694 |
| 4 | 0.0232 | 15.281 | 18.592 | 19.146 | 23.063 | 19.404 |
| 4 | 0.0242 | 7.034  | 15.274 | 9.488  | 28.947 | 17.071 |



|   |        |        |        |        |        |        |
|---|--------|--------|--------|--------|--------|--------|
| 4 | 0.0252 | 4.769  | 13.947 | 8.431  | 31.848 | 21.254 |
| 4 | 0.0262 | 18.717 | 12.892 | 11.626 | 41.071 | 29.696 |
| 4 | 0.0272 | 17.119 | 15.074 | 12.235 | 34.221 | 23.832 |
| 4 | 0.0282 | 8.186  | 11.630 | 8.407  | 30.811 | 16.888 |
| 4 | 0.0292 | 10.169 | 15.590 | 6.621  | 31.301 | 19.134 |
| 4 | 0.0302 | 7.712  | 11.508 | 5.494  | 31.176 | 12.938 |
| 4 | 0.0312 | 14.905 | 13.368 | 12.353 | 42.409 | 19.930 |
| 4 | 0.0322 | 11.323 | 14.085 | 12.987 | 20.709 | 21.302 |
| 4 | 0.0332 | 17.646 | 22.628 | 16.768 | 22.944 | 18.758 |
| 4 | 0.0342 | 23.424 | 25.150 | 16.341 | 32.711 | 22.047 |
| 4 | 0.0352 | 18.234 | 14.922 | 12.815 | 30.568 | 17.159 |
| 4 | 0.0362 | 17.248 | 18.552 | 13.364 | 27.730 | 26.850 |
| 4 | 0.0372 | 11.385 | 11.879 | 10.102 | 23.643 | 23.920 |
| 4 | 0.0382 | 8.241  | 9.350  | 7.070  | 20.825 | 20.750 |
| 4 | 0.0392 | 10.602 | 5.120  | 8.406  | 7.570  | 11.707 |
| 4 | 0.0402 | 9.520  | 7.551  | 4.452  | 16.083 | 22.225 |
| 4 | 0.0412 | 15.598 | 11.322 | 17.475 | 19.585 | 18.393 |
| 4 | 0.0422 | 17.327 | 19.165 | 12.720 | 23.968 | 25.787 |
| 4 | 0.0432 | 16.953 | 19.072 | 15.923 | 19.817 | 22.898 |
| 4 | 0.0442 | 16.272 | 20.155 | 20.888 | 21.977 | 24.432 |
| 4 | 0.0452 | 8.635  | 10.954 | 11.779 | 15.834 | 13.648 |
| 4 | 0.0462 | 13.091 | 7.007  | 13.241 | 15.595 | 8.304  |
| 4 | 0.0472 | 12.346 | 18.236 | 12.443 | 24.726 | 24.452 |
| 4 | 0.0482 | 16.574 | 21.366 | 16.119 | 18.722 | 16.293 |
| 4 | 0.0492 | 10.001 | 14.745 | 12.425 | 21.200 | 21.741 |
| 4 | 0.0502 | 15.547 | 13.446 | 14.988 | 6.948  | 20.298 |
| 4 | 0.0512 | 10.438 | 19.899 | 12.189 | 23.851 | 20.657 |
| 4 | 0.0522 | 12.210 | 14.625 | 10.551 | 15.881 | 23.675 |
| 4 | 0.0532 | 7.138  | 12.347 | 9.909  | 13.948 | 14.681 |
| 4 | 0.0542 | 4.761  | 9.445  | 7.260  | 13.919 | 16.963 |
| 4 | 0.0552 | 12.401 | 15.339 | 15.982 | 16.494 | 11.123 |
| 4 | 0.0562 | 11.617 | 20.487 | 16.190 | 18.948 | 13.613 |
| 4 | 0.0572 | 5.899  | 6.884  | 7.061  | 17.334 | 28.636 |
| 4 | 0.0582 | 5.850  | 10.236 | 7.831  | 24.314 | 25.201 |
| 4 | 0.0592 | 8.050  | 14.956 | 8.951  | 17.978 | 13.665 |
| 4 | 0.0602 | 10.793 | 9.968  | 8.740  | 19.904 | 14.544 |
| 4 | 0.0612 | 6.256  | 13.825 | 7.126  | 24.150 | 24.529 |
| 4 | 0.0622 | 11.746 | 14.289 | 10.927 | 14.774 | 15.293 |
| 4 | 0.0632 | 16.609 | 20.994 | 22.526 | 12.474 | 15.189 |
| 4 | 0.0642 | 10.451 | 14.154 | 12.450 | 10.113 | 12.340 |
| 4 | 0.0652 | 9.452  | 13.041 | 10.953 | 26.258 | 15.385 |
| 4 | 0.0662 | 8.952  | 7.773  | 9.314  | 26.839 | 12.113 |
| 4 | 0.0672 | 26.085 | 17.289 | 17.812 | 16.307 | 10.209 |
| 4 | 0.0682 | 12.648 | 7.568  | 9.460  | 4.811  | 12.302 |
| 4 | 0.0692 | 3.042  | 2.688  | 3.684  | 8.116  | 4.179  |
| 4 | 0.0702 | 14.816 | 11.749 | 20.042 | 18.549 | 17.425 |
| 4 | 0.0712 | 24.621 | 32.361 | 25.881 | 28.181 | 18.070 |
| 4 | 0.0722 | 21.273 | 15.779 | 13.947 | 21.460 | 14.027 |
| 4 | 0.0732 | 10.205 | 14.844 | 10.632 | 23.250 | 19.165 |
| 4 | 0.0742 | 5.293  | 18.637 | 11.564 | 18.346 | 13.806 |

|   |        |        |        |        |        |        |
|---|--------|--------|--------|--------|--------|--------|
| 4 | 0.0752 | 1.759  | 3.143  | 2.739  | 3.041  | 3.110  |
| 4 | 0.0762 | 5.430  | 6.293  | 5.838  | 16.558 | 14.500 |
| 4 | 0.0772 | 5.519  | 6.591  | 8.438  | 14.130 | 12.652 |
| 4 | 0.0782 | 11.304 | 9.203  | 7.340  | 12.236 | 18.582 |
| 4 | 0.0792 | 13.997 | 8.029  | 9.156  | 28.885 | 17.585 |
| 4 | 0.0802 | 11.231 | 18.613 | 4.978  | 36.762 | 18.517 |
| 4 | 0.0812 | 14.485 | 21.172 | 11.273 | 35.829 | 17.882 |
| 4 | 0.0822 | 5.478  | 12.773 | 8.449  | 42.291 | 17.253 |
| 4 | 0.0832 | 9.909  | 9.888  | 7.205  | 23.133 | 27.394 |
| 4 | 0.0842 | 4.840  | 17.922 | 7.378  | 31.456 | 11.579 |
| 4 | 0.0852 | 4.111  | 14.626 | 7.887  | 25.908 | 16.175 |
| 4 | 0.0862 | 11.797 | 10.656 | 10.354 | 33.666 | 23.142 |
| 4 | 0.0872 | 20.487 | 10.637 | 11.714 | 30.498 | 25.164 |
| 4 | 0.0882 | 13.019 | 16.213 | 12.535 | 22.949 | 20.821 |
| 4 | 0.0892 | 16.549 | 18.292 | 16.349 | 24.375 | 14.879 |
| 4 | 0.0902 | 12.053 | 8.943  | 15.624 | 27.558 | 26.573 |
| 4 | 0.0912 | 21.765 | 15.918 | 15.143 | 25.875 | 13.299 |
| 4 | 0.0922 | 21.791 | 15.745 | 15.274 | 25.524 | 13.103 |
| 4 | 0.0932 | 15.934 | 19.486 | 18.024 | 8.467  | 10.505 |
| 4 | 0.0942 | 16.708 | 7.882  | 10.800 | 27.238 | 29.022 |
| 4 | 0.0952 | 10.184 | 15.615 | 9.707  | 21.607 | 18.449 |
| 4 | 0.0962 | 9.327  | 15.046 | 8.469  | 26.067 | 14.456 |
| 4 | 0.0972 | 13.137 | 15.384 | 12.399 | 35.143 | 19.758 |
| 4 | 0.0982 | 21.104 | 27.591 | 26.088 | 36.384 | 16.665 |
| 4 | 0.0992 | 9.330  | 16.126 | 9.466  | 32.672 | 12.298 |
| 4 | 0.1002 | 7.938  | 8.950  | 6.726  | 12.136 | 15.448 |
| 4 | 0.1012 | 12.009 | 15.117 | 11.687 | 14.606 | 14.529 |
| 4 | 0.1022 | 10.241 | 20.546 | 12.713 | 31.116 | 10.904 |
| 4 | 0.1032 | 10.307 | 20.609 | 15.536 | 26.404 | 10.110 |
| 4 | 0.1042 | 21.059 | 23.042 | 22.943 | 41.191 | 17.976 |
| 4 | 0.1052 | 13.529 | 13.619 | 14.537 | 43.760 | 20.716 |
| 4 | 0.1062 | 13.766 | 15.238 | 11.538 | 25.879 | 27.396 |
| 4 | 0.1072 | 8.093  | 13.201 | 8.019  | 40.241 | 20.868 |
| 4 | 0.1082 | 6.624  | 7.037  | 4.042  | 25.966 | 16.910 |
| 4 | 0.1092 | 7.600  | 12.609 | 7.194  | 32.152 | 19.141 |
| 4 | 0.1102 | 3.343  | 14.410 | 7.193  | 37.455 | 20.830 |
| 4 | 0.1112 | 3.370  | 14.417 | 7.235  | 37.318 | 20.844 |
| 4 | 0.1122 | 7.263  | 13.780 | 11.083 | 17.819 | 15.418 |
| 4 | 0.1132 | 11.025 | 24.880 | 13.508 | 26.075 | 12.622 |
| 4 | 0.1142 | 15.371 | 20.884 | 19.417 | 24.192 | 11.232 |
| 4 | 0.1152 | 17.124 | 17.248 | 17.264 | 12.288 | 12.245 |
| 4 | 0.1162 | 11.031 | 18.069 | 15.572 | 27.846 | 17.503 |
| 4 | 0.1172 | 18.689 | 22.377 | 21.911 | 24.495 | 15.562 |
| 4 | 0.1182 | 14.567 | 23.099 | 21.110 | 26.871 | 28.682 |
| 4 | 0.1192 | 10.695 | 21.554 | 16.040 | 48.377 | 23.200 |
| 4 | 0.1202 | 3.860  | 15.385 | 9.331  | 40.486 | 20.237 |
| 4 | 0.1212 | 2.859  | 8.912  | 6.622  | 25.737 | 25.765 |
| 4 | 0.1222 | 6.294  | 8.313  | 8.487  | 12.809 | 13.436 |
| 4 | 0.1232 | 3.762  | 5.105  | 6.493  | 8.476  | 15.300 |
| 4 | 0.1242 | 11.813 | 17.148 | 14.448 | 14.819 | 26.652 |

|   |        |        |        |        |        |        |
|---|--------|--------|--------|--------|--------|--------|
| 4 | 0.1252 | 7.192  | 18.990 | 9.196  | 30.644 | 20.415 |
| 4 | 0.1262 | 19.041 | 20.595 | 26.061 | 28.425 | 18.560 |
| 4 | 0.1272 | 14.565 | 22.678 | 20.775 | 14.744 | 12.400 |
| 4 | 0.1282 | 13.811 | 17.184 | 18.749 | 18.922 | 23.002 |
| 4 | 0.1292 | 13.768 | 17.114 | 18.533 | 18.772 | 22.800 |
| 4 | 0.1302 | 5.638  | 9.902  | 15.907 | 8.714  | 7.462  |
| 4 | 0.1312 | 14.346 | 18.036 | 21.217 | 18.703 | 18.176 |
| 4 | 0.1322 | 12.351 | 10.222 | 13.192 | 24.807 | 14.488 |
| 4 | 0.1332 | 11.874 | 12.840 | 8.799  | 36.283 | 14.397 |
| 4 | 0.1342 | 20.398 | 17.046 | 13.930 | 38.796 | 19.660 |
| 4 | 0.1352 | 8.869  | 10.477 | 6.829  | 19.111 | 29.961 |
| 4 | 0.1362 | 18.740 | 24.390 | 26.575 | 24.123 | 18.856 |
| 4 | 0.1372 | 13.501 | 19.098 | 18.212 | 17.606 | 4.482  |
| 4 | 0.1382 | 5.407  | 7.701  | 6.413  | 9.995  | 14.903 |
| 4 | 0.1392 | 5.698  | 6.689  | 7.743  | 6.919  | 15.127 |
| 4 | 0.1402 | 9.923  | 8.627  | 7.416  | 11.252 | 12.654 |
| 4 | 0.1412 | 10.171 | 19.497 | 8.031  | 21.548 | 15.688 |
| 4 | 0.1422 | 15.700 | 19.739 | 16.278 | 15.203 | 8.011  |
| 4 | 0.1432 | 15.454 | 26.024 | 18.814 | 25.334 | 16.631 |
| 4 | 0.1442 | 17.642 | 10.584 | 15.373 | 31.167 | 18.979 |
| 4 | 0.1452 | 11.660 | 5.781  | 14.545 | 17.768 | 18.904 |
| 4 | 0.1462 | 16.186 | 16.538 | 19.679 | 13.060 | 11.536 |
| 4 | 0.1472 | 22.053 | 24.881 | 19.813 | 16.437 | 12.543 |
| 4 | 0.1482 | 17.479 | 22.296 | 19.630 | 28.213 | 13.119 |
| 4 | 0.1492 | 14.517 | 7.907  | 12.193 | 13.120 | 15.034 |
| 4 | 0.1502 | 13.934 | 12.046 | 9.300  | 16.091 | 8.902  |
| 4 | 0.1512 | 25.471 | 12.888 | 21.679 | 25.291 | 11.243 |
| 4 | 0.1522 | 19.806 | 6.816  | 10.137 | 21.003 | 19.392 |
| 4 | 0.1532 | 9.452  | 10.445 | 14.924 | 8.457  | 13.750 |
| 4 | 0.1542 | 9.246  | 6.978  | 8.349  | 15.756 | 6.655  |
| 4 | 0.1552 | 9.643  | 10.480 | 9.781  | 19.291 | 9.078  |
| 4 | 0.1562 | 7.381  | 10.799 | 8.253  | 26.668 | 12.875 |
| 4 | 0.1572 | 26.134 | 19.363 | 25.007 | 25.713 | 17.736 |
| 4 | 0.1582 | 11.780 | 7.373  | 9.681  | 25.972 | 16.761 |
| 4 | 0.1592 | 5.335  | 7.158  | 5.045  | 22.445 | 10.202 |
| 4 | 0.1602 | 11.410 | 12.855 | 13.691 | 27.243 | 10.766 |
| 4 | 0.1612 | 10.152 | 12.149 | 8.063  | 20.810 | 11.002 |
| 4 | 0.1622 | 13.693 | 14.982 | 11.749 | 15.838 | 11.840 |
| 4 | 0.1632 | 12.025 | 8.846  | 10.685 | 31.412 | 20.753 |
| 4 | 0.1642 | 14.251 | 10.956 | 9.806  | 18.413 | 10.334 |
| 4 | 0.1652 | 10.500 | 8.812  | 8.186  | 22.244 | 12.700 |
| 4 | 0.1662 | 9.500  | 5.236  | 6.435  | 22.850 | 11.362 |
| 4 | 0.1672 | 6.088  | 8.748  | 7.186  | 27.109 | 19.465 |
| 4 | 0.1682 | 7.869  | 8.605  | 7.206  | 18.847 | 19.809 |
| 4 | 0.1692 | 9.483  | 6.644  | 8.652  | 25.861 | 11.808 |
| 4 | 0.1702 | 13.607 | 11.508 | 11.920 | 32.008 | 11.745 |
| 4 | 0.1712 | 13.534 | 11.439 | 11.883 | 32.044 | 11.764 |
| 4 | 0.1722 | 7.759  | 10.413 | 7.876  | 34.959 | 12.174 |
| 4 | 0.1732 | 8.628  | 16.548 | 8.187  | 31.657 | 14.406 |
| 4 | 0.1742 | 5.878  | 11.849 | 7.969  | 35.181 | 12.436 |

|   |        |        |        |        |        |        |
|---|--------|--------|--------|--------|--------|--------|
| 4 | 0.1752 | 6.007  | 15.041 | 8.335  | 31.284 | 11.833 |
| 4 | 0.1762 | 10.594 | 9.654  | 7.086  | 24.833 | 15.589 |
| 4 | 0.1772 | 10.305 | 18.971 | 18.134 | 25.943 | 19.748 |
| 4 | 0.1782 | 8.633  | 18.547 | 17.689 | 23.203 | 19.065 |
| 4 | 0.1792 | 14.417 | 23.026 | 17.039 | 32.984 | 26.043 |
| 4 | 0.1802 | 13.946 | 13.204 | 19.094 | 15.753 | 23.146 |
| 4 | 0.1812 | 6.614  | 12.766 | 16.321 | 23.697 | 16.917 |
| 4 | 0.1822 | 9.181  | 14.119 | 17.173 | 21.094 | 12.722 |
| 4 | 0.1832 | 11.490 | 18.066 | 10.549 | 12.121 | 6.747  |
| 4 | 0.1842 | 11.428 | 16.488 | 18.150 | 12.413 | 9.964  |
| 4 | 0.1852 | 14.293 | 10.917 | 14.511 | 12.048 | 27.795 |
| 4 | 0.1862 | 19.320 | 11.855 | 17.763 | 24.422 | 28.081 |
| 4 | 0.1872 | 11.392 | 9.881  | 8.272  | 11.755 | 7.752  |
| 4 | 0.1882 | 11.401 | 16.017 | 10.896 | 14.103 | 7.113  |
| 4 | 0.1892 | 20.371 | 15.748 | 21.341 | 21.255 | 7.509  |
| 4 | 0.1902 | 8.898  | 12.233 | 9.150  | 21.802 | 18.062 |
| 4 | 0.1912 | 6.317  | 10.601 | 12.844 | 13.726 | 15.580 |
| 4 | 0.1922 | 14.697 | 6.217  | 13.460 | 17.529 | 15.736 |
| 4 | 0.1932 | 9.861  | 11.744 | 10.200 | 17.061 | 17.763 |
| 4 | 0.1942 | 5.456  | 10.728 | 9.786  | 13.582 | 14.352 |
| 4 | 0.1952 | 10.497 | 10.581 | 11.080 | 31.366 | 24.402 |
| 4 | 0.1962 | 13.545 | 14.854 | 13.625 | 33.316 | 26.607 |
| 4 | 0.1972 | 10.022 | 10.068 | 12.805 | 18.529 | 15.265 |
| 4 | 0.1982 | 10.564 | 15.889 | 10.657 | 9.235  | 14.832 |
| 4 | 0.1992 | 17.566 | 12.444 | 20.345 | 25.893 | 6.472  |
| 4 | 0.2002 | 11.920 | 13.138 | 13.288 | 22.601 | 18.838 |
| 4 | 0.2012 | 17.053 | 10.611 | 13.695 | 7.352  | 7.825  |
| 4 | 0.2022 | 8.666  | 7.088  | 8.861  | 7.612  | 7.137  |
| 4 | 0.2032 | 13.566 | 9.706  | 11.386 | 16.700 | 11.549 |
| 4 | 0.2042 | 21.504 | 17.979 | 18.988 | 16.454 | 19.478 |
| 4 | 0.2052 | 16.965 | 12.762 | 16.645 | 28.260 | 13.860 |
| 4 | 0.2062 | 12.432 | 16.719 | 16.520 | 21.218 | 9.592  |
| 4 | 0.2072 | 4.577  | 5.656  | 5.115  | 13.733 | 8.292  |
| 4 | 0.2082 | 9.264  | 18.054 | 9.589  | 18.885 | 19.100 |
| 4 | 0.2092 | 10.766 | 9.992  | 13.805 | 10.432 | 9.742  |
| 4 | 0.2102 | 15.152 | 18.946 | 20.486 | 10.556 | 15.075 |
| 4 | 0.2112 | 11.703 | 10.094 | 10.069 | 14.544 | 18.553 |
| 4 | 0.2122 | 16.385 | 18.313 | 14.321 | 21.171 | 20.412 |
| 4 | 0.2132 | 7.597  | 13.365 | 9.321  | 17.816 | 8.144  |
| 4 | 0.2142 | 14.737 | 15.321 | 11.808 | 18.980 | 10.951 |
| 4 | 0.2152 | 14.994 | 14.582 | 18.047 | 5.625  | 6.824  |
| 4 | 0.2162 | 10.318 | 3.941  | 11.323 | 13.620 | 8.159  |
| 4 | 0.2172 | 4.563  | 12.030 | 6.979  | 13.916 | 7.783  |
| 4 | 0.2182 | 17.741 | 21.671 | 12.986 | 23.534 | 8.398  |
| 4 | 0.2192 | 17.802 | 21.723 | 13.023 | 23.515 | 8.364  |
| 4 | 0.2202 | 17.864 | 21.774 | 13.060 | 23.495 | 8.336  |
| 4 | 0.2212 | 12.103 | 16.225 | 9.903  | 16.362 | 12.740 |
| 4 | 0.2222 | 11.725 | 8.901  | 8.897  | 12.971 | 11.222 |
| 4 | 0.2232 | 8.064  | 10.508 | 3.417  | 18.295 | 13.032 |
| 4 | 0.2242 | 7.998  | 10.455 | 3.379  | 18.301 | 13.033 |

|   |        |        |        |        |        |        |
|---|--------|--------|--------|--------|--------|--------|
| 4 | 0.2252 | 7.931  | 10.401 | 3.341  | 18.306 | 13.034 |
| 4 | 0.2262 | 7.863  | 10.346 | 3.303  | 18.310 | 13.035 |
| 4 | 0.2272 | 20.102 | 15.566 | 15.056 | 10.100 | 14.226 |
| 4 | 0.2282 | 10.042 | 11.885 | 10.126 | 27.837 | 12.853 |
| 4 | 0.2292 | 3.517  | 8.350  | 3.470  | 14.720 | 4.748  |
| 4 | 0.2302 | 6.645  | 13.509 | 4.601  | 16.266 | 11.164 |
| 4 | 0.2312 | 14.186 | 13.229 | 14.860 | 32.136 | 10.187 |
| 4 | 0.2322 | 14.473 | 9.393  | 11.836 | 30.751 | 18.648 |
| 4 | 0.2332 | 6.274  | 7.422  | 6.571  | 37.677 | 13.682 |
| 4 | 0.2342 | 2.884  | 13.093 | 5.613  | 34.044 | 15.851 |
| 4 | 0.2352 | 8.561  | 17.138 | 12.264 | 19.350 | 16.689 |
| 4 | 0.2362 | 6.820  | 11.787 | 5.738  | 20.394 | 13.799 |
| 4 | 0.2372 | 14.237 | 15.899 | 9.749  | 31.035 | 11.705 |
| 4 | 0.2382 | 14.229 | 15.896 | 9.763  | 31.044 | 11.707 |
| 4 | 0.2392 | 8.464  | 7.947  | 8.213  | 19.065 | 9.625  |
| 4 | 0.2402 | 16.308 | 15.997 | 18.234 | 16.308 | 14.315 |
| 4 | 0.2412 | 17.032 | 18.755 | 21.898 | 18.065 | 19.055 |
| 4 | 0.2422 | 17.450 | 10.357 | 8.050  | 24.121 | 12.518 |
| 4 | 0.2432 | 12.624 | 15.334 | 15.590 | 24.702 | 18.607 |
| 4 | 0.2442 | 10.109 | 7.523  | 7.034  | 19.840 | 8.503  |
| 4 | 0.2452 | 7.234  | 7.679  | 5.522  | 3.035  | 3.797  |
| 4 | 0.2462 | 7.492  | 6.255  | 6.733  | 4.550  | 4.262  |
| 4 | 0.2472 | 8.793  | 7.221  | 8.806  | 4.604  | 6.215  |
| 4 | 0.2482 | 10.141 | 13.261 | 12.794 | 12.990 | 6.308  |
| 4 | 0.2492 | 8.837  | 14.324 | 9.058  | 19.855 | 6.087  |
| 4 | 0.2502 | 7.272  | 6.262  | 11.072 | 13.757 | 7.165  |
| 4 | 0.2512 | 8.014  | 10.487 | 7.645  | 13.969 | 6.119  |
| 4 | 0.2522 | 9.213  | 13.300 | 5.827  | 23.390 | 8.728  |
| 4 | 0.2532 | 13.640 | 17.658 | 10.550 | 22.712 | 13.348 |
| 4 | 0.2542 | 12.316 | 20.637 | 12.581 | 28.593 | 11.876 |
| 4 | 0.2552 | 8.328  | 11.043 | 10.946 | 3.938  | 4.342  |
| 4 | 0.2562 | 17.860 | 18.485 | 20.640 | 12.070 | 1.872  |
| 4 | 0.2572 | 13.084 | 17.326 | 16.550 | 14.630 | 4.080  |
| 4 | 0.2582 | 17.194 | 24.307 | 19.718 | 23.802 | 19.165 |
| 4 | 0.2592 | 10.635 | 15.504 | 9.118  | 27.106 | 17.117 |
| 4 | 0.2602 | 10.445 | 15.249 | 9.011  | 26.957 | 17.114 |
| 4 | 0.2612 | 27.451 | 20.422 | 17.636 | 31.234 | 11.407 |
| 4 | 0.2622 | 14.697 | 16.244 | 12.430 | 24.985 | 11.322 |
| 4 | 0.2632 | 9.723  | 11.749 | 6.111  | 24.688 | 14.385 |
| 4 | 0.2642 | 14.192 | 15.487 | 17.228 | 16.651 | 9.262  |
| 4 | 0.2652 | 11.671 | 20.132 | 18.038 | 17.698 | 9.815  |
| 4 | 0.2662 | 7.380  | 13.448 | 11.197 | 18.075 | 14.755 |
| 4 | 0.2672 | 9.686  | 11.993 | 13.840 | 7.371  | 6.510  |
| 4 | 0.2682 | 3.493  | 4.536  | 3.346  | 16.543 | 7.838  |
| 4 | 0.2692 | 5.027  | 10.787 | 8.056  | 20.287 | 7.765  |
| 4 | 0.2702 | 5.532  | 8.304  | 6.207  | 9.215  | 7.486  |
| 4 | 0.2712 | 6.045  | 9.000  | 5.895  | 14.287 | 6.641  |
| 4 | 0.2722 | 10.672 | 11.917 | 9.841  | 16.207 | 6.631  |
| 4 | 0.2732 | 7.344  | 14.610 | 7.002  | 28.352 | 11.526 |
| 4 | 0.2742 | 13.415 | 11.736 | 11.992 | 13.243 | 12.146 |

|   |        |        |        |        |        |        |
|---|--------|--------|--------|--------|--------|--------|
| 4 | 0.2752 | 9.514  | 16.233 | 13.485 | 17.187 | 14.962 |
| 4 | 0.2762 | 14.382 | 18.226 | 16.675 | 23.966 | 18.957 |
| 4 | 0.2772 | 15.225 | 15.188 | 14.268 | 19.276 | 13.073 |
| 4 | 0.2782 | 7.098  | 6.040  | 5.972  | 5.543  | 6.838  |
| 4 | 0.2792 | 7.538  | 9.241  | 7.460  | 15.319 | 8.221  |
| 4 | 0.2802 | 18.980 | 16.466 | 13.589 | 24.835 | 14.873 |
| 4 | 0.2812 | 18.973 | 16.477 | 13.583 | 24.852 | 14.842 |
| 4 | 0.2822 | 10.331 | 14.990 | 11.690 | 20.122 | 8.224  |
| 4 | 0.2832 | 7.392  | 13.516 | 8.738  | 13.384 | 7.884  |
| 4 | 0.2842 | 18.860 | 15.852 | 20.848 | 10.574 | 8.466  |
| 4 | 0.2852 | 26.966 | 22.488 | 26.503 | 16.573 | 7.561  |
| 4 | 0.2862 | 19.633 | 12.035 | 17.829 | 24.372 | 11.404 |
| 4 | 0.2872 | 14.743 | 14.435 | 15.082 | 19.642 | 11.983 |
| 4 | 0.2882 | 16.835 | 17.787 | 15.051 | 17.066 | 15.488 |
| 4 | 0.2892 | 13.879 | 19.847 | 14.879 | 17.218 | 15.877 |
| 4 | 0.2902 | 8.816  | 6.467  | 6.384  | 9.433  | 8.743  |
| 4 | 0.2912 | 12.520 | 16.420 | 14.873 | 11.961 | 12.298 |
| 4 | 0.2922 | 8.534  | 12.376 | 9.217  | 12.494 | 9.394  |
| 4 | 0.2932 | 13.437 | 14.319 | 15.839 | 6.970  | 10.850 |
| 4 | 0.2942 | 6.392  | 5.118  | 4.569  | 5.041  | 11.333 |
| 4 | 0.2952 | 14.250 | 15.632 | 12.163 | 22.693 | 10.225 |
| 4 | 0.2962 | 10.693 | 18.458 | 10.137 | 19.189 | 14.025 |
| 4 | 0.2972 | 20.039 | 21.582 | 13.485 | 26.087 | 16.631 |
| 4 | 0.2982 | 18.275 | 11.683 | 16.409 | 10.780 | 18.119 |
| 4 | 0.2992 | 28.437 | 23.391 | 30.956 | 17.050 | 15.792 |
| 4 | 0.3002 | 13.967 | 11.338 | 15.854 | 17.236 | 9.482  |
| 4 | 0.3012 | 15.786 | 15.867 | 14.006 | 10.129 | 9.573  |
| 4 | 0.3022 | 9.323  | 12.683 | 15.412 | 7.708  | 5.755  |
| 4 | 0.3032 | 9.228  | 12.555 | 15.277 | 7.680  | 5.712  |
| 4 | 0.3042 | 9.135  | 12.427 | 15.143 | 7.655  | 5.678  |
| 4 | 0.3052 | 9.045  | 12.301 | 15.010 | 7.633  | 5.652  |
| 4 | 0.3062 | 5.314  | 11.243 | 7.176  | 13.368 | 13.598 |
| 4 | 0.3072 | 12.191 | 14.717 | 12.228 | 21.854 | 18.686 |
| 4 | 0.3082 | 18.606 | 11.139 | 13.756 | 21.251 | 9.286  |
| 4 | 0.3092 | 17.160 | 10.553 | 13.030 | 11.488 | 5.819  |
| 4 | 0.3102 | 8.553  | 3.987  | 9.058  | 10.054 | 6.587  |
| 4 | 0.3112 | 18.519 | 11.306 | 18.227 | 9.280  | 10.339 |
| 4 | 0.3122 | 26.547 | 10.880 | 19.523 | 11.081 | 8.594  |
| 4 | 0.3132 | 19.545 | 14.142 | 17.344 | 4.767  | 9.987  |
| 4 | 0.3142 | 12.014 | 9.432  | 12.475 | 1.537  | 4.572  |
| 4 | 0.3152 | 13.086 | 13.490 | 13.775 | 17.527 | 10.373 |
| 4 | 0.3162 | 18.774 | 18.854 | 16.522 | 14.952 | 9.716  |
| 4 | 0.3172 | 16.731 | 12.234 | 14.482 | 10.781 | 11.300 |
| 4 | 0.3182 | 7.114  | 8.681  | 11.340 | 6.946  | 2.893  |
| 4 | 0.3192 | 14.237 | 11.908 | 12.607 | 8.045  | 14.879 |
| 4 | 0.3202 | 11.825 | 9.707  | 9.834  | 12.437 | 10.585 |
| 4 | 0.3212 | 11.125 | 12.121 | 12.860 | 12.019 | 7.334  |
| 4 | 0.3222 | 6.181  | 2.933  | 3.878  | 10.033 | 5.053  |
| 4 | 0.3232 | 9.234  | 4.178  | 9.334  | 9.296  | 6.254  |
| 4 | 0.3242 | 11.643 | 7.589  | 12.022 | 14.120 | 13.730 |

|   |        |        |        |        |        |        |
|---|--------|--------|--------|--------|--------|--------|
| 4 | 0.3252 | 9.123  | 12.557 | 14.824 | 14.325 | 10.088 |
| 4 | 0.3262 | 6.237  | 3.453  | 6.920  | 6.338  | 9.977  |
| 4 | 0.3272 | 16.345 | 5.059  | 13.315 | 17.682 | 13.713 |
| 4 | 0.3282 | 22.330 | 16.088 | 16.053 | 18.152 | 15.048 |
| 4 | 0.3292 | 13.424 | 13.888 | 13.267 | 11.352 | 15.495 |
| 4 | 0.3302 | 8.762  | 7.007  | 10.133 | 12.113 | 8.659  |
| 4 | 0.3312 | 9.176  | 6.861  | 9.942  | 8.511  | 3.425  |
| 4 | 0.3322 | 13.511 | 11.279 | 12.642 | 10.787 | 5.441  |
| 4 | 0.3332 | 13.468 | 11.610 | 13.142 | 24.010 | 19.875 |
| 4 | 0.3342 | 14.783 | 10.294 | 17.131 | 17.877 | 8.792  |
| 4 | 0.3352 | 8.708  | 8.418  | 9.395  | 11.684 | 9.872  |
| 4 | 0.3362 | 8.391  | 11.558 | 9.060  | 17.636 | 10.143 |
| 4 | 0.3372 | 18.075 | 16.020 | 18.869 | 11.557 | 16.304 |
| 4 | 0.3382 | 11.349 | 10.607 | 14.356 | 14.493 | 16.926 |
| 4 | 0.3392 | 21.563 | 20.807 | 25.380 | 9.684  | 15.395 |
| 4 | 0.3402 | 20.384 | 14.250 | 22.130 | 10.693 | 8.537  |
| 4 | 0.3412 | 21.666 | 18.496 | 23.211 | 10.248 | 12.763 |
| 4 | 0.3422 | 15.019 | 6.737  | 18.171 | 11.224 | 11.785 |
| 4 | 0.3432 | 15.405 | 10.335 | 19.082 | 14.560 | 16.607 |
| 4 | 0.3442 | 7.936  | 10.698 | 14.336 | 12.442 | 12.516 |
| 4 | 0.3452 | 7.858  | 9.945  | 10.738 | 14.971 | 10.611 |
| 4 | 0.3462 | 6.282  | 8.522  | 7.945  | 7.679  | 6.686  |
| 4 | 0.3472 | 5.806  | 7.624  | 7.603  | 9.059  | 15.912 |
| 4 | 0.3482 | 10.827 | 14.943 | 15.568 | 5.938  | 8.572  |
| 4 | 0.3492 | 17.019 | 13.175 | 16.306 | 13.019 | 10.614 |
| 4 | 0.3502 | 12.739 | 9.747  | 14.198 | 7.786  | 14.005 |
| 4 | 0.3512 | 23.159 | 19.805 | 24.437 | 11.461 | 19.149 |
| 4 | 0.3522 | 9.538  | 9.584  | 12.219 | 9.034  | 8.739  |
| 4 | 0.3532 | 2.408  | 9.299  | 6.457  | 12.010 | 6.670  |
| 4 | 0.3542 | 9.182  | 14.171 | 10.742 | 14.496 | 10.025 |
| 4 | 0.3552 | 9.061  | 9.397  | 8.165  | 3.597  | 9.406  |
| 4 | 0.3562 | 13.210 | 13.028 | 10.905 | 15.043 | 16.749 |
| 4 | 0.3572 | 9.275  | 8.926  | 10.202 | 11.373 | 10.850 |
| 4 | 0.3582 | 21.544 | 9.945  | 20.543 | 10.771 | 14.841 |
| 4 | 0.3592 | 22.458 | 10.150 | 20.794 | 10.305 | 14.240 |
| 4 | 0.3602 | 5.754  | 8.427  | 5.360  | 8.188  | 14.027 |
| 4 | 0.3612 | 9.252  | 12.799 | 12.713 | 11.361 | 18.637 |
| 4 | 0.3622 | 7.502  | 5.683  | 9.585  | 9.914  | 11.768 |
| 4 | 0.3632 | 4.226  | 5.947  | 10.301 | 8.089  | 10.876 |
| 4 | 0.3642 | 1.469  | 2.821  | 2.432  | 6.989  | 5.010  |
| 4 | 0.3652 | 5.393  | 4.553  | 4.352  | 7.734  | 7.406  |
| 4 | 0.3662 | 10.635 | 17.865 | 14.065 | 18.994 | 13.905 |
| 4 | 0.3672 | 16.430 | 12.373 | 12.576 | 15.370 | 17.262 |
| 4 | 0.3682 | 9.639  | 11.485 | 9.311  | 18.831 | 9.790  |
| 4 | 0.3692 | 9.186  | 10.672 | 8.785  | 14.440 | 7.904  |
| 4 | 0.3702 | 13.264 | 13.691 | 16.992 | 20.989 | 16.131 |
| 4 | 0.3712 | 10.551 | 11.838 | 14.585 | 16.883 | 12.972 |
| 4 | 0.3722 | 7.333  | 7.137  | 11.812 | 14.444 | 8.861  |
| 4 | 0.3732 | 6.785  | 6.354  | 10.188 | 3.053  | 6.891  |
| 4 | 0.3742 | 6.844  | 8.497  | 8.878  | 8.622  | 8.082  |

|   |        |        |        |        |        |        |
|---|--------|--------|--------|--------|--------|--------|
| 4 | 0.3752 | 10.473 | 10.923 | 11.806 | 13.734 | 18.424 |
| 4 | 0.3762 | 11.628 | 8.580  | 16.083 | 7.399  | 12.644 |
| 4 | 0.3772 | 10.158 | 10.285 | 10.860 | 21.286 | 7.090  |
| 4 | 0.3782 | 13.166 | 25.039 | 21.411 | 21.360 | 10.388 |
| 4 | 0.3792 | 12.322 | 18.521 | 15.571 | 21.978 | 18.725 |
| 4 | 0.3802 | 5.431  | 11.479 | 6.536  | 17.682 | 11.569 |
| 4 | 0.3812 | 3.608  | 11.321 | 6.518  | 18.702 | 12.669 |
| 4 | 0.3822 | 12.917 | 12.136 | 11.613 | 13.514 | 11.651 |
| 4 | 0.3832 | 13.004 | 11.898 | 10.078 | 7.423  | 9.514  |
| 4 | 0.3842 | 15.586 | 20.539 | 17.701 | 18.177 | 12.241 |
| 4 | 0.3852 | 10.492 | 13.887 | 8.408  | 13.254 | 8.635  |
| 4 | 0.3862 | 12.007 | 16.836 | 10.961 | 19.641 | 7.698  |
| 4 | 0.3872 | 11.154 | 11.951 | 12.427 | 20.638 | 12.629 |
| 4 | 0.3882 | 13.292 | 11.891 | 12.603 | 17.536 | 11.051 |
| 4 | 0.3892 | 9.168  | 10.981 | 12.349 | 12.194 | 14.903 |
| 4 | 0.3902 | 17.599 | 5.199  | 8.869  | 8.326  | 17.396 |
| 4 | 0.3912 | 8.234  | 8.956  | 7.846  | 14.927 | 8.639  |
| 4 | 0.3922 | 9.554  | 15.194 | 5.766  | 15.693 | 7.468  |
| 4 | 0.3932 | 12.440 | 21.737 | 15.193 | 21.878 | 11.438 |
| 4 | 0.3942 | 3.038  | 3.863  | 4.604  | 6.262  | 6.830  |
| 4 | 0.3952 | 2.831  | 2.620  | 5.205  | 5.471  | 4.978  |
| 4 | 0.3962 | 7.837  | 2.439  | 10.029 | 7.300  | 3.509  |
| 4 | 0.3972 | 6.746  | 2.388  | 5.002  | 7.284  | 7.572  |
| 4 | 0.3982 | 7.043  | 6.362  | 7.194  | 7.411  | 8.400  |
| 4 | 0.3992 | 7.043  | 6.361  | 7.192  | 7.413  | 8.401  |
| 4 | 0.4002 | 19.014 | 18.638 | 21.526 | 20.933 | 9.955  |
| 4 | 0.4012 | 17.202 | 22.995 | 14.624 | 11.000 | 13.500 |
| 4 | 0.4022 | 4.398  | 3.483  | 7.493  | 6.350  | 7.721  |
| 4 | 0.4032 | 14.887 | 8.931  | 12.718 | 18.319 | 14.944 |
| 4 | 0.4042 | 9.946  | 7.273  | 8.595  | 14.213 | 15.535 |
| 4 | 0.4052 | 11.451 | 13.928 | 13.309 | 6.696  | 14.496 |
| 4 | 0.4062 | 15.802 | 13.997 | 17.936 | 13.452 | 16.235 |
| 4 | 0.4072 | 25.453 | 18.041 | 20.062 | 13.950 | 14.269 |
| 4 | 0.4082 | 18.397 | 18.658 | 14.187 | 19.426 | 19.266 |
| 4 | 0.4092 | 13.728 | 18.136 | 15.953 | 8.440  | 8.446  |
| 4 | 0.4102 | 3.582  | 4.344  | 4.078  | 2.176  | 1.478  |
| 4 | 0.4112 | 8.416  | 8.770  | 6.297  | 2.511  | 1.751  |
| 4 | 0.4122 | 13.529 | 10.586 | 13.334 | 10.203 | 10.589 |
| 4 | 0.4132 | 15.737 | 15.997 | 17.851 | 14.451 | 11.458 |
| 4 | 0.4142 | 15.521 | 17.484 | 18.134 | 6.286  | 11.115 |
| 4 | 0.4152 | 11.749 | 17.525 | 14.670 | 9.897  | 11.937 |
| 4 | 0.4162 | 16.120 | 11.145 | 11.140 | 11.895 | 9.314  |
| 4 | 0.4172 | 10.274 | 4.870  | 3.844  | 16.002 | 9.514  |
| 4 | 0.4182 | 16.716 | 20.537 | 15.206 | 21.488 | 17.376 |
| 4 | 0.4192 | 17.737 | 8.710  | 13.017 | 7.990  | 11.798 |
| 4 | 0.4202 | 10.611 | 8.147  | 10.842 | 10.999 | 13.757 |
| 4 | 0.4212 | 10.510 | 12.095 | 14.719 | 14.758 | 9.662  |
| 4 | 0.4222 | 10.376 | 18.036 | 14.763 | 17.699 | 13.871 |
| 4 | 0.4232 | 10.360 | 17.992 | 14.723 | 17.652 | 13.882 |
| 4 | 0.4242 | 15.407 | 9.805  | 12.967 | 19.738 | 14.091 |



|   |        |        |        |        |        |        |
|---|--------|--------|--------|--------|--------|--------|
| 4 | 0.4252 | 13.587 | 8.619  | 14.076 | 12.869 | 12.864 |
| 4 | 0.4262 | 5.401  | 7.738  | 6.885  | 9.214  | 6.756  |
| 4 | 0.4272 | 9.023  | 8.952  | 7.265  | 7.877  | 14.494 |
| 4 | 0.4282 | 21.364 | 14.977 | 10.652 | 14.345 | 13.619 |
| 4 | 0.4292 | 11.580 | 7.337  | 12.623 | 9.058  | 6.002  |
| 4 | 0.4302 | 4.365  | 4.111  | 3.688  | 11.701 | 8.608  |
| 4 | 0.4312 | 20.119 | 13.383 | 17.070 | 5.779  | 8.785  |
| 4 | 0.4322 | 23.928 | 21.358 | 23.366 | 16.792 | 10.695 |
| 4 | 0.4332 | 15.912 | 10.432 | 11.161 | 22.908 | 14.267 |
| 4 | 0.4342 | 11.410 | 7.640  | 11.328 | 13.593 | 12.962 |
| 4 | 0.4352 | 17.333 | 13.282 | 16.157 | 11.369 | 12.979 |
| 4 | 0.4362 | 17.691 | 12.564 | 15.815 | 11.871 | 10.077 |
| 4 | 0.4372 | 10.030 | 6.710  | 8.695  | 10.825 | 11.619 |
| 4 | 0.4382 | 6.789  | 5.221  | 6.271  | 11.862 | 5.904  |
| 4 | 0.4392 | 8.194  | 2.541  | 4.820  | 3.933  | 12.445 |
| 4 | 0.4402 | 17.643 | 11.884 | 11.904 | 1.857  | 12.377 |
| 4 | 0.4412 | 7.938  | 8.758  | 9.742  | 15.449 | 16.926 |
| 4 | 0.4422 | 9.138  | 7.138  | 9.109  | 11.112 | 19.399 |
| 4 | 0.4432 | 10.239 | 8.642  | 9.484  | 5.843  | 9.902  |
| 4 | 0.4442 | 12.724 | 6.025  | 9.091  | 8.229  | 14.713 |
| 4 | 0.4452 | 18.855 | 13.691 | 17.435 | 16.941 | 11.353 |
| 4 | 0.4462 | 6.929  | 13.036 | 6.134  | 23.199 | 16.665 |
| 4 | 0.4472 | 4.569  | 8.981  | 4.052  | 12.863 | 16.484 |
| 4 | 0.4482 | 10.837 | 11.638 | 11.023 | 10.962 | 13.870 |
| 4 | 0.4492 | 7.883  | 10.559 | 11.276 | 5.398  | 4.735  |
| 4 | 0.4502 | 10.703 | 7.951  | 9.643  | 10.477 | 16.685 |
| 4 | 0.4512 | 17.566 | 11.767 | 15.311 | 10.767 | 12.826 |
| 4 | 0.4522 | 14.864 | 15.404 | 12.608 | 8.394  | 7.949  |
| 4 | 0.4532 | 7.142  | 8.148  | 3.294  | 10.849 | 8.601  |
| 4 | 0.4542 | 7.504  | 5.604  | 8.242  | 11.295 | 9.234  |
| 4 | 0.4552 | 8.583  | 5.902  | 7.138  | 5.088  | 10.416 |
| 4 | 0.4562 | 8.779  | 9.226  | 10.269 | 9.509  | 9.808  |
| 4 | 0.4572 | 11.879 | 5.856  | 7.054  | 9.160  | 16.617 |
| 4 | 0.4582 | 23.770 | 17.738 | 16.695 | 12.571 | 18.752 |
| 4 | 0.4592 | 23.388 | 20.824 | 19.798 | 4.772  | 9.177  |
| 4 | 0.4602 | 23.743 | 22.395 | 24.862 | 6.324  | 11.773 |
| 4 | 0.4612 | 17.872 | 13.939 | 18.089 | 6.113  | 5.824  |
| 4 | 0.4622 | 17.054 | 9.326  | 13.893 | 8.974  | 18.607 |
| 4 | 0.4632 | 15.760 | 16.572 | 18.823 | 11.297 | 27.371 |
| 4 | 0.4642 | 28.768 | 20.355 | 25.650 | 9.845  | 8.943  |
| 4 | 0.4652 | 19.049 | 14.290 | 17.100 | 12.743 | 8.131  |
| 4 | 0.4662 | 8.224  | 11.198 | 8.490  | 15.552 | 11.069 |
| 4 | 0.4672 | 12.986 | 10.361 | 12.590 | 18.466 | 30.611 |
| 4 | 0.4682 | 20.503 | 6.649  | 13.508 | 17.914 | 28.184 |
| 4 | 0.4692 | 17.033 | 14.618 | 17.066 | 17.242 | 14.494 |
| 4 | 0.4702 | 8.963  | 13.807 | 9.335  | 9.713  | 13.933 |
| 4 | 0.4712 | 10.929 | 12.177 | 9.889  | 10.354 | 8.876  |
| 4 | 0.4722 | 10.689 | 8.148  | 11.619 | 15.751 | 12.461 |
| 4 | 0.4732 | 22.804 | 18.653 | 21.440 | 21.543 | 26.358 |
| 4 | 0.4742 | 7.563  | 2.870  | 4.549  | 6.203  | 0.969  |

|   |        |        |        |        |        |        |
|---|--------|--------|--------|--------|--------|--------|
| 4 | 0.4752 | 11.234 | 5.158  | 8.658  | 6.254  | 4.682  |
| 4 | 0.4762 | 8.727  | 8.161  | 7.882  | 6.119  | 7.763  |
| 4 | 0.4772 | 15.302 | 14.105 | 12.854 | 4.835  | 14.451 |
| 4 | 0.4782 | 13.155 | 8.892  | 10.773 | 14.766 | 16.909 |
| 4 | 0.4792 | 17.137 | 7.693  | 12.249 | 9.258  | 15.932 |
| 4 | 0.4802 | 15.301 | 11.405 | 13.748 | 14.001 | 13.371 |
| 4 | 0.4812 | 19.952 | 17.442 | 19.176 | 20.390 | 21.154 |
| 4 | 0.4822 | 21.967 | 14.706 | 16.611 | 18.375 | 17.190 |
| 4 | 0.4832 | 25.425 | 17.473 | 19.894 | 23.151 | 9.978  |
| 4 | 0.4842 | 25.443 | 22.706 | 16.182 | 21.200 | 21.313 |
| 4 | 0.4852 | 15.057 | 20.222 | 10.873 | 8.065  | 11.721 |
| 4 | 0.4862 | 8.743  | 6.137  | 9.137  | 9.787  | 15.059 |
| 4 | 0.4872 | 10.027 | 12.290 | 11.379 | 8.032  | 9.610  |
| 4 | 0.4882 | 10.663 | 10.824 | 12.848 | 9.221  | 8.672  |
| 4 | 0.4892 | 18.613 | 17.076 | 22.576 | 14.855 | 13.928 |
| 4 | 0.4902 | 22.291 | 17.728 | 21.870 | 13.952 | 15.074 |
| 4 | 0.4912 | 26.351 | 19.593 | 22.767 | 25.133 | 32.733 |
| 4 | 0.4922 | 17.373 | 15.598 | 13.274 | 15.318 | 17.439 |
| 4 | 0.4932 | 12.240 | 13.459 | 10.437 | 15.428 | 19.151 |
| 4 | 0.4942 | 18.409 | 19.463 | 21.297 | 9.729  | 14.654 |
| 4 | 0.4952 | 14.737 | 13.190 | 17.762 | 8.269  | 7.149  |
| 4 | 0.4962 | 22.647 | 20.214 | 23.614 | 24.400 | 19.004 |
| 4 | 0.4972 | 17.294 | 20.370 | 20.846 | 25.008 | 19.555 |
| 4 | 0.4982 | 15.160 | 25.649 | 21.416 | 21.936 | 18.646 |
| 4 | 0.4992 | 22.796 | 22.930 | 19.737 | 15.084 | 17.865 |
| 4 | 0.5002 | 15.513 | 15.806 | 13.746 | 18.695 | 18.093 |
| 4 | 0.5012 | 12.669 | 10.994 | 10.535 | 12.108 | 15.999 |
| 4 | 0.5022 | 13.890 | 11.566 | 9.004  | 26.273 | 20.286 |
| 4 | 0.5032 | 14.288 | 12.398 | 12.869 | 22.549 | 22.394 |
| 4 | 0.5042 | 22.164 | 24.478 | 27.685 | 10.650 | 26.149 |
| 4 | 0.5052 | 17.395 | 11.465 | 13.255 | 17.625 | 14.698 |
| 4 | 0.5062 | 15.971 | 16.786 | 16.442 | 17.729 | 16.855 |
| 4 | 0.5072 | 18.517 | 15.051 | 18.564 | 7.969  | 12.382 |
| 4 | 0.5082 | 12.657 | 15.024 | 15.741 | 23.502 | 31.748 |
| 4 | 0.5092 | 18.935 | 20.947 | 18.516 | 27.441 | 41.978 |
| 4 | 0.5102 | 18.942 | 20.941 | 18.536 | 27.448 | 41.981 |
| 4 | 0.5112 | 24.619 | 28.165 | 25.377 | 19.630 | 11.874 |
| 4 | 0.5122 | 14.460 | 27.249 | 20.166 | 20.847 | 5.777  |
| 4 | 0.5132 | 15.596 | 27.986 | 19.347 | 18.477 | 9.017  |
| 4 | 0.5142 | 23.346 | 24.635 | 18.428 | 16.639 | 16.329 |
| 4 | 0.5152 | 9.793  | 12.834 | 7.019  | 11.017 | 10.182 |
| 4 | 0.5162 | 14.174 | 22.465 | 16.455 | 11.189 | 11.420 |
| 4 | 0.5172 | 12.935 | 16.080 | 13.148 | 8.699  | 4.502  |
| 4 | 0.5182 | 15.255 | 13.882 | 16.989 | 22.373 | 11.910 |
| 4 | 0.5192 | 17.457 | 7.045  | 15.040 | 12.918 | 9.959  |
| 4 | 0.5202 | 4.890  | 7.228  | 5.408  | 8.735  | 7.970  |
| 4 | 0.5212 | 11.869 | 16.971 | 11.993 | 18.790 | 5.912  |
| 4 | 0.5222 | 6.915  | 5.595  | 12.310 | 6.733  | 5.232  |
| 4 | 0.5232 | 12.437 | 8.660  | 9.070  | 5.004  | 9.252  |
| 4 | 0.5242 | 9.170  | 11.613 | 9.825  | 5.713  | 6.279  |

|   |        |        |        |        |        |        |
|---|--------|--------|--------|--------|--------|--------|
| 4 | 0.5252 | 11.183 | 12.148 | 10.814 | 16.311 | 8.441  |
| 4 | 0.5262 | 11.179 | 12.150 | 10.795 | 16.314 | 8.441  |
| 4 | 0.5272 | 7.477  | 4.221  | 4.540  | 12.395 | 6.374  |
| 4 | 0.5282 | 6.521  | 7.036  | 3.667  | 8.176  | 5.515  |
| 4 | 0.5292 | 7.924  | 9.263  | 5.959  | 10.852 | 8.935  |
| 4 | 0.5302 | 8.600  | 7.873  | 8.854  | 8.328  | 12.885 |
| 4 | 0.5312 | 10.325 | 9.837  | 10.483 | 11.047 | 8.631  |
| 4 | 0.5322 | 17.097 | 14.274 | 11.776 | 18.033 | 15.942 |
| 4 | 0.5332 | 23.146 | 18.994 | 12.603 | 7.006  | 23.336 |
| 4 | 0.5342 | 14.874 | 28.067 | 13.303 | 12.491 | 16.851 |
| 4 | 0.5352 | 18.106 | 19.786 | 16.304 | 15.675 | 11.369 |
| 4 | 0.5362 | 12.668 | 14.641 | 11.854 | 14.703 | 11.661 |
| 4 | 0.5372 | 12.670 | 14.646 | 11.854 | 14.706 | 11.660 |
| 4 | 0.5382 | 10.926 | 20.883 | 12.267 | 20.292 | 8.678  |
| 4 | 0.5392 | 11.974 | 21.042 | 10.142 | 13.977 | 13.638 |
| 4 | 0.5402 | 12.206 | 19.060 | 10.630 | 22.726 | 6.652  |
| 4 | 0.5412 | 19.677 | 17.951 | 14.768 | 22.254 | 17.841 |
| 4 | 0.5422 | 18.766 | 20.515 | 14.523 | 18.738 | 12.174 |
| 4 | 0.5432 | 33.449 | 22.699 | 27.719 | 9.425  | 12.419 |
| 4 | 0.5442 | 19.930 | 20.444 | 23.277 | 9.919  | 11.039 |
| 4 | 0.5452 | 20.451 | 19.452 | 17.654 | 9.359  | 9.392  |
| 4 | 0.5462 | 16.229 | 19.099 | 13.753 | 19.321 | 16.583 |
| 4 | 0.5472 | 12.728 | 14.887 | 10.457 | 21.012 | 16.675 |
| 4 | 0.5482 | 15.411 | 24.652 | 12.339 | 20.047 | 10.893 |
| 4 | 0.5492 | 22.392 | 24.392 | 16.336 | 10.296 | 20.251 |
| 4 | 0.5502 | 15.597 | 11.920 | 6.839  | 11.762 | 15.457 |
| 4 | 0.5512 | 21.515 | 20.363 | 14.600 | 15.201 | 10.399 |
| 4 | 0.5522 | 12.064 | 10.754 | 9.078  | 8.787  | 7.449  |
| 4 | 0.5532 | 14.794 | 15.700 | 14.840 | 15.270 | 8.638  |
| 4 | 0.5542 | 12.159 | 18.486 | 13.972 | 16.583 | 17.019 |
| 4 | 0.5552 | 9.628  | 7.339  | 7.668  | 17.272 | 24.844 |
| 4 | 0.5562 | 22.017 | 14.270 | 15.411 | 20.378 | 18.951 |
| 4 | 0.5572 | 19.582 | 13.607 | 14.991 | 11.527 | 17.021 |
| 4 | 0.5582 | 9.754  | 7.364  | 7.801  | 9.610  | 11.390 |
| 4 | 0.5592 | 7.957  | 5.405  | 3.950  | 7.496  | 6.021  |
| 4 | 0.5602 | 13.469 | 13.391 | 15.731 | 13.843 | 8.608  |
| 4 | 0.5612 | 13.560 | 13.392 | 15.739 | 13.973 | 8.662  |
| 4 | 0.5622 | 11.024 | 10.995 | 8.091  | 13.779 | 14.664 |
| 4 | 0.5632 | 11.048 | 11.020 | 8.091  | 13.782 | 14.707 |
| 4 | 0.5642 | 17.346 | 17.425 | 14.395 | 8.330  | 11.320 |
| 4 | 0.5652 | 16.863 | 17.726 | 11.865 | 9.202  | 18.222 |
| 4 | 0.5662 | 21.530 | 28.967 | 22.377 | 10.187 | 13.002 |
| 4 | 0.5672 | 14.619 | 21.235 | 11.922 | 11.003 | 9.763  |
| 4 | 0.5682 | 12.496 | 14.972 | 14.445 | 9.874  | 15.414 |
| 4 | 0.5692 | 10.318 | 13.191 | 7.050  | 11.450 | 8.062  |
| 4 | 0.5702 | 18.934 | 18.573 | 18.418 | 14.630 | 7.809  |
| 4 | 0.5712 | 12.332 | 11.791 | 7.437  | 3.447  | 11.221 |
| 4 | 0.5722 | 9.437  | 11.316 | 5.943  | 6.379  | 11.915 |
| 4 | 0.5732 | 14.913 | 13.706 | 10.053 | 17.974 | 12.984 |
| 4 | 0.5742 | 32.413 | 35.832 | 27.534 | 9.810  | 20.414 |

|   |        |        |        |        |        |        |
|---|--------|--------|--------|--------|--------|--------|
| 4 | 0.5752 | 7.537  | 11.907 | 6.579  | 9.240  | 8.387  |
| 4 | 0.5762 | 14.098 | 11.468 | 14.026 | 10.225 | 8.276  |
| 4 | 0.5772 | 11.715 | 9.130  | 9.382  | 11.955 | 9.045  |
| 4 | 0.5782 | 13.139 | 10.529 | 9.413  | 11.390 | 13.742 |
| 4 | 0.5792 | 9.814  | 10.784 | 10.089 | 18.644 | 19.241 |
| 4 | 0.5802 | 24.227 | 21.813 | 24.403 | 13.906 | 17.593 |
| 4 | 0.5812 | 16.804 | 17.824 | 16.868 | 7.850  | 10.156 |
| 4 | 0.5822 | 13.363 | 14.465 | 13.664 | 16.177 | 10.251 |
| 4 | 0.5832 | 21.570 | 22.322 | 19.713 | 14.805 | 16.188 |
| 4 | 0.5842 | 26.965 | 21.210 | 21.151 | 19.896 | 25.386 |
| 4 | 0.5852 | 15.555 | 17.569 | 12.128 | 13.878 | 17.924 |
| 4 | 0.5862 | 24.496 | 19.195 | 18.069 | 12.672 | 5.668  |
| 4 | 0.5872 | 21.477 | 20.055 | 17.133 | 11.691 | 12.476 |
| 4 | 0.5882 | 15.167 | 18.552 | 18.116 | 4.799  | 1.912  |
| 4 | 0.5892 | 16.142 | 22.438 | 19.645 | 11.301 | 22.797 |
| 4 | 0.5902 | 24.636 | 18.640 | 18.618 | 19.798 | 10.479 |
| 4 | 0.5912 | 18.032 | 11.819 | 10.589 | 18.299 | 16.468 |
| 4 | 0.5922 | 15.707 | 9.935  | 11.174 | 15.904 | 25.257 |
| 4 | 0.5932 | 22.455 | 20.677 | 15.943 | 16.438 | 24.402 |
| 4 | 0.5942 | 17.494 | 16.639 | 11.267 | 14.458 | 20.314 |
| 4 | 0.5952 | 11.702 | 13.225 | 6.430  | 21.100 | 22.695 |
| 4 | 0.5962 | 21.918 | 21.112 | 18.498 | 15.076 | 17.292 |
| 4 | 0.5972 | 15.791 | 20.266 | 19.576 | 10.775 | 12.208 |
| 4 | 0.5982 | 19.303 | 24.704 | 17.062 | 10.944 | 20.841 |
| 4 | 0.5992 | 27.164 | 31.736 | 19.751 | 12.479 | 11.974 |
| 4 | 0.6002 | 10.879 | 12.089 | 12.213 | 13.828 | 11.692 |
| 4 | 0.6012 | 22.642 | 17.478 | 19.670 | 9.931  | 10.221 |
| 4 | 0.6022 | 20.790 | 16.799 | 17.384 | 13.621 | 26.111 |
| 4 | 0.6032 | 19.426 | 23.597 | 20.383 | 11.976 | 17.409 |
| 4 | 0.6042 | 17.963 | 20.303 | 19.486 | 9.022  | 20.815 |
| 4 | 0.6052 | 9.161  | 13.951 | 19.802 | 6.764  | 19.078 |
| 4 | 0.6062 | 10.834 | 17.948 | 14.458 | 11.364 | 10.808 |
| 4 | 0.6072 | 15.294 | 28.264 | 17.068 | 24.130 | 19.242 |
| 4 | 0.6082 | 21.235 | 26.858 | 15.594 | 11.442 | 12.189 |
| 4 | 0.6092 | 12.161 | 24.325 | 13.862 | 20.965 | 15.303 |
| 4 | 0.6102 | 10.828 | 23.166 | 17.696 | 15.040 | 22.171 |
| 4 | 0.6112 | 6.890  | 11.364 | 10.582 | 16.208 | 14.066 |
| 4 | 0.6122 | 19.628 | 15.802 | 17.618 | 20.084 | 9.988  |
| 4 | 0.6132 | 21.778 | 21.997 | 17.359 | 24.601 | 12.644 |
| 4 | 0.6142 | 15.952 | 19.317 | 16.344 | 16.892 | 14.706 |
| 4 | 0.6152 | 13.815 | 12.487 | 11.668 | 15.244 | 18.688 |
| 4 | 0.6162 | 38.742 | 46.914 | 32.656 | 23.292 | 17.649 |
| 4 | 0.6172 | 19.239 | 36.879 | 18.705 | 17.989 | 12.516 |
| 4 | 0.6182 | 18.819 | 17.770 | 17.604 | 8.159  | 19.000 |
| 4 | 0.6192 | 18.839 | 19.437 | 24.638 | 21.252 | 17.305 |
| 4 | 0.6202 | 13.922 | 20.446 | 13.979 | 8.380  | 11.213 |
| 4 | 0.6212 | 18.957 | 26.551 | 20.406 | 14.755 | 16.582 |
| 4 | 0.6222 | 24.663 | 32.397 | 26.890 | 25.311 | 12.529 |
| 4 | 0.6232 | 13.286 | 17.809 | 17.222 | 20.497 | 16.785 |
| 4 | 0.6242 | 10.043 | 12.908 | 8.218  | 16.511 | 17.028 |

|   |        |        |        |        |        |        |
|---|--------|--------|--------|--------|--------|--------|
| 4 | 0.6252 | 20.752 | 21.870 | 19.742 | 14.264 | 14.978 |
| 4 | 0.6262 | 21.879 | 27.489 | 16.490 | 31.319 | 24.504 |
| 4 | 0.6272 | 11.392 | 12.061 | 12.610 | 17.466 | 9.381  |
| 4 | 0.6282 | 10.062 | 19.212 | 11.101 | 22.621 | 4.594  |
| 4 | 0.6292 | 11.567 | 30.431 | 16.650 | 25.892 | 19.488 |
| 4 | 0.6302 | 12.531 | 17.072 | 14.831 | 16.495 | 17.777 |
| 4 | 0.6312 | 12.020 | 17.760 | 13.884 | 7.011  | 19.554 |
| 4 | 0.6322 | 9.619  | 15.759 | 9.295  | 24.546 | 10.507 |
| 4 | 0.6332 | 17.452 | 19.545 | 13.118 | 24.817 | 10.212 |
| 4 | 0.6342 | 15.538 | 17.788 | 12.124 | 22.443 | 7.681  |
| 4 | 0.6352 | 20.926 | 14.779 | 12.623 | 22.475 | 18.371 |
| 4 | 0.6362 | 13.665 | 16.216 | 11.731 | 19.232 | 8.931  |
| 4 | 0.6372 | 14.735 | 24.062 | 17.657 | 24.325 | 9.057  |
| 4 | 0.6382 | 14.532 | 17.112 | 9.063  | 20.718 | 5.954  |
| 4 | 0.6392 | 12.618 | 18.706 | 12.684 | 13.078 | 12.759 |
| 4 | 0.6402 | 16.483 | 21.784 | 19.231 | 25.640 | 11.526 |
| 4 | 0.6412 | 14.125 | 26.823 | 22.841 | 23.350 | 17.011 |
| 4 | 0.6422 | 13.602 | 12.379 | 13.560 | 12.288 | 15.533 |
| 4 | 0.6432 | 19.584 | 16.264 | 12.834 | 14.609 | 9.317  |
| 4 | 0.6442 | 13.758 | 25.874 | 15.657 | 29.805 | 15.643 |
| 4 | 0.6452 | 15.687 | 21.098 | 16.511 | 16.944 | 13.700 |
| 4 | 0.6462 | 5.620  | 11.418 | 6.955  | 9.961  | 13.263 |
| 4 | 0.6472 | 18.964 | 17.076 | 13.750 | 14.624 | 20.644 |
| 4 | 0.6482 | 23.870 | 23.875 | 18.822 | 14.943 | 20.340 |
| 4 | 0.6492 | 23.449 | 26.004 | 18.637 | 17.142 | 8.887  |
| 4 | 0.6502 | 17.922 | 16.575 | 14.232 | 14.934 | 7.213  |
| 4 | 0.6512 | 21.633 | 24.537 | 17.876 | 17.051 | 13.990 |
| 4 | 0.6522 | 13.101 | 18.852 | 13.467 | 17.687 | 11.008 |
| 4 | 0.6532 | 12.451 | 20.775 | 19.872 | 15.482 | 14.463 |
| 4 | 0.6542 | 14.990 | 19.892 | 15.043 | 19.116 | 8.781  |
| 4 | 0.6552 | 28.124 | 16.439 | 15.065 | 17.210 | 25.551 |
| 4 | 0.6562 | 19.739 | 21.270 | 17.992 | 19.494 | 22.300 |
| 4 | 0.6572 | 17.945 | 20.220 | 17.533 | 22.056 | 17.477 |
| 4 | 0.6582 | 7.217  | 10.834 | 6.494  | 10.724 | 6.749  |
| 4 | 0.6592 | 13.368 | 10.677 | 7.054  | 13.176 | 8.158  |
| 4 | 0.6602 | 14.473 | 15.890 | 12.842 | 13.817 | 12.325 |
| 4 | 0.6612 | 23.274 | 27.986 | 24.919 | 33.424 | 14.464 |
| 4 | 0.6622 | 25.851 | 21.470 | 19.660 | 31.774 | 14.362 |
| 4 | 0.6632 | 13.111 | 15.008 | 13.386 | 26.202 | 9.033  |
| 4 | 0.6642 | 16.489 | 19.393 | 10.278 | 32.421 | 11.625 |
| 4 | 0.6652 | 16.598 | 19.944 | 14.750 | 25.592 | 9.240  |
| 4 | 0.6662 | 19.033 | 18.191 | 15.274 | 16.099 | 9.648  |
| 4 | 0.6672 | 22.391 | 19.946 | 19.568 | 17.734 | 13.775 |
| 4 | 0.6682 | 14.676 | 16.377 | 12.091 | 26.522 | 13.699 |
| 4 | 0.6692 | 18.090 | 18.635 | 14.096 | 27.559 | 9.507  |
| 4 | 0.6702 | 19.352 | 20.704 | 16.538 | 22.661 | 15.903 |
| 4 | 0.6712 | 22.718 | 18.208 | 19.929 | 25.052 | 19.640 |
| 4 | 0.6722 | 7.792  | 6.287  | 6.529  | 12.806 | 16.991 |
| 4 | 0.6732 | 11.477 | 9.826  | 10.105 | 23.786 | 20.084 |
| 4 | 0.6742 | 9.148  | 17.568 | 12.071 | 18.930 | 22.709 |

|   |        |        |        |        |        |        |
|---|--------|--------|--------|--------|--------|--------|
| 4 | 0.6752 | 12.758 | 26.950 | 19.020 | 22.015 | 24.698 |
| 4 | 0.6762 | 15.467 | 21.888 | 21.558 | 19.538 | 16.625 |
| 4 | 0.6772 | 19.900 | 18.977 | 17.978 | 14.309 | 22.463 |
| 4 | 0.6782 | 17.397 | 18.831 | 14.280 | 28.786 | 34.988 |
| 4 | 0.6792 | 8.140  | 22.119 | 12.109 | 18.786 | 30.582 |
| 4 | 0.6802 | 12.921 | 24.188 | 12.562 | 11.920 | 31.626 |
| 4 | 0.6812 | 17.786 | 24.177 | 15.130 | 17.857 | 12.276 |
| 4 | 0.6822 | 12.870 | 17.766 | 8.793  | 15.142 | 9.394  |
| 4 | 0.6832 | 8.752  | 15.984 | 10.908 | 20.942 | 11.422 |
| 4 | 0.6842 | 9.454  | 14.938 | 9.911  | 24.938 | 7.990  |
| 4 | 0.6852 | 12.252 | 17.458 | 11.263 | 27.278 | 24.726 |
| 4 | 0.6862 | 13.399 | 20.881 | 11.476 | 34.313 | 13.571 |
| 4 | 0.6872 | 13.431 | 20.873 | 11.482 | 34.269 | 13.610 |
| 4 | 0.6882 | 12.344 | 22.069 | 12.578 | 25.090 | 11.603 |
| 4 | 0.6892 | 17.648 | 20.809 | 17.903 | 26.249 | 15.105 |
| 4 | 0.6902 | 26.305 | 27.572 | 25.093 | 28.001 | 25.213 |
| 4 | 0.6912 | 3.960  | 13.636 | 2.230  | 22.394 | 24.323 |
| 4 | 0.6922 | 8.903  | 14.393 | 5.779  | 10.869 | 25.122 |
| 4 | 0.6932 | 13.147 | 15.487 | 13.395 | 12.299 | 13.737 |
| 4 | 0.6942 | 6.798  | 13.179 | 5.856  | 16.854 | 12.456 |
| 4 | 0.6952 | 9.105  | 7.864  | 8.377  | 15.730 | 11.815 |
| 4 | 0.6962 | 15.540 | 19.607 | 13.322 | 9.684  | 11.098 |
| 4 | 0.6972 | 12.912 | 13.174 | 10.927 | 17.808 | 14.983 |
| 4 | 0.6982 | 8.839  | 13.170 | 11.693 | 17.339 | 11.665 |
| 4 | 0.6992 | 16.350 | 14.530 | 15.138 | 23.333 | 14.590 |
| 4 | 0.7002 | 18.139 | 14.500 | 16.630 | 18.372 | 18.914 |
| 4 | 0.7012 | 10.916 | 12.601 | 15.652 | 20.137 | 11.526 |
| 4 | 0.7022 | 6.181  | 9.431  | 8.164  | 13.965 | 13.614 |
| 4 | 0.7032 | 12.998 | 17.876 | 15.927 | 22.383 | 16.323 |
| 4 | 0.7042 | 12.698 | 18.594 | 11.500 | 29.786 | 19.160 |
| 4 | 0.7052 | 18.907 | 27.457 | 19.181 | 22.476 | 20.867 |
| 4 | 0.7062 | 12.766 | 14.578 | 11.192 | 15.813 | 16.117 |
| 4 | 0.7072 | 12.213 | 16.264 | 12.941 | 13.682 | 8.670  |
| 4 | 0.7082 | 11.264 | 11.757 | 10.752 | 10.583 | 12.550 |
| 4 | 0.7092 | 22.478 | 27.141 | 23.513 | 23.497 | 25.140 |
| 4 | 0.7102 | 5.076  | 9.501  | 7.906  | 17.168 | 10.176 |
| 4 | 0.7112 | 9.686  | 4.780  | 6.872  | 13.530 | 16.335 |
| 4 | 0.7122 | 10.730 | 13.021 | 12.913 | 13.223 | 14.527 |
| 4 | 0.7132 | 16.079 | 18.228 | 19.016 | 22.703 | 10.079 |
| 4 | 0.7142 | 16.251 | 16.500 | 14.579 | 22.424 | 14.766 |
| 4 | 0.7152 | 6.046  | 10.600 | 7.490  | 10.875 | 3.830  |
| 4 | 0.7162 | 5.816  | 10.101 | 10.474 | 16.342 | 13.444 |
| 4 | 0.7172 | 9.452  | 16.435 | 11.099 | 21.110 | 15.649 |
| 4 | 0.7182 | 6.744  | 10.698 | 11.923 | 9.132  | 9.710  |
| 4 | 0.7192 | 10.862 | 9.213  | 13.135 | 7.793  | 19.531 |
| 4 | 0.7202 | 11.985 | 20.221 | 13.030 | 15.729 | 8.834  |
| 4 | 0.7212 | 11.198 | 8.872  | 6.689  | 13.173 | 12.627 |
| 4 | 0.7222 | 10.231 | 7.485  | 10.619 | 8.128  | 8.163  |
| 4 | 0.7232 | 13.266 | 9.257  | 13.920 | 9.213  | 7.146  |
| 4 | 0.7242 | 20.080 | 16.377 | 19.126 | 13.700 | 14.773 |

|   |        |        |        |        |        |        |
|---|--------|--------|--------|--------|--------|--------|
| 4 | 0.7252 | 10.676 | 11.708 | 7.096  | 6.790  | 12.186 |
| 4 | 0.7262 | 11.708 | 9.500  | 6.951  | 12.030 | 12.851 |
| 4 | 0.7272 | 11.649 | 7.604  | 7.019  | 10.589 | 9.954  |
| 4 | 0.7282 | 7.263  | 20.322 | 5.719  | 26.185 | 19.445 |
| 4 | 0.7292 | 15.424 | 15.906 | 11.256 | 24.554 | 16.628 |
| 4 | 0.7302 | 7.287  | 7.639  | 4.795  | 11.555 | 6.951  |
| 4 | 0.7312 | 7.690  | 12.607 | 12.181 | 11.124 | 4.203  |
| 4 | 0.7322 | 7.962  | 8.903  | 7.329  | 7.519  | 10.070 |
| 4 | 0.7332 | 5.969  | 5.575  | 5.020  | 9.438  | 7.177  |
| 4 | 0.7342 | 10.330 | 11.790 | 10.361 | 7.259  | 6.644  |
| 4 | 0.7352 | 23.176 | 20.014 | 22.920 | 19.639 | 9.243  |
| 4 | 0.7362 | 8.552  | 16.481 | 14.394 | 14.848 | 5.323  |
| 4 | 0.7372 | 10.708 | 17.092 | 17.166 | 13.113 | 7.340  |
| 4 | 0.7382 | 12.406 | 16.413 | 16.545 | 13.136 | 14.370 |
| 4 | 0.7392 | 7.140  | 12.088 | 11.700 | 8.080  | 11.545 |
| 4 | 0.7402 | 4.908  | 11.704 | 9.881  | 7.271  | 7.439  |
| 4 | 0.7412 | 6.982  | 7.014  | 3.281  | 6.043  | 9.797  |
| 4 | 0.7422 | 8.950  | 8.175  | 5.411  | 8.689  | 18.888 |
| 4 | 0.7432 | 6.301  | 8.509  | 6.715  | 9.261  | 7.456  |
| 4 | 0.7442 | 10.489 | 3.695  | 9.486  | 11.957 | 28.259 |
| 4 | 0.7452 | 19.740 | 12.771 | 20.024 | 11.023 | 8.972  |
| 4 | 0.7462 | 15.025 | 15.515 | 14.462 | 9.821  | 15.713 |
| 4 | 0.7472 | 12.341 | 11.585 | 6.868  | 5.909  | 13.441 |
| 4 | 0.7482 | 26.288 | 24.080 | 22.047 | 8.065  | 17.645 |
| 4 | 0.7492 | 12.307 | 14.100 | 10.095 | 12.079 | 14.324 |
| 4 | 0.7502 | 20.566 | 15.623 | 15.523 | 6.414  | 15.905 |
| 4 | 0.7512 | 12.942 | 17.010 | 16.054 | 12.311 | 18.264 |
| 4 | 0.7522 | 8.073  | 7.218  | 7.305  | 10.908 | 23.150 |
| 4 | 0.7532 | 13.400 | 18.288 | 15.982 | 8.870  | 11.694 |
| 4 | 0.7542 | 13.272 | 13.885 | 13.860 | 9.185  | 11.570 |
| 4 | 0.7552 | 15.523 | 11.840 | 12.637 | 19.414 | 12.826 |
| 4 | 0.7562 | 12.394 | 14.246 | 12.990 | 13.950 | 25.254 |
| 4 | 0.7572 | 9.167  | 13.587 | 11.476 | 12.179 | 15.225 |
| 4 | 0.7582 | 13.069 | 13.602 | 10.267 | 12.415 | 17.074 |
| 4 | 0.7592 | 12.473 | 5.626  | 12.821 | 3.184  | 11.621 |
| 4 | 0.7602 | 13.534 | 17.359 | 15.823 | 19.837 | 16.836 |
| 4 | 0.7612 | 12.339 | 13.595 | 11.792 | 13.669 | 10.600 |
| 4 | 0.7622 | 10.831 | 12.769 | 14.874 | 14.455 | 14.208 |
| 4 | 0.7632 | 14.569 | 19.035 | 19.239 | 16.095 | 9.179  |
| 4 | 0.7642 | 15.931 | 15.784 | 16.553 | 15.001 | 9.605  |
| 4 | 0.7652 | 10.371 | 8.076  | 11.614 | 15.816 | 8.082  |
| 4 | 0.7662 | 15.350 | 15.948 | 17.939 | 14.668 | 5.634  |
| 4 | 0.7672 | 8.088  | 18.217 | 16.757 | 21.046 | 11.041 |
| 4 | 0.7682 | 13.376 | 14.834 | 13.807 | 7.973  | 11.455 |
| 4 | 0.7692 | 14.919 | 19.500 | 14.499 | 17.014 | 9.529  |
| 4 | 0.7702 | 14.991 | 19.540 | 14.549 | 17.014 | 9.522  |
| 4 | 0.7712 | 13.241 | 16.576 | 20.276 | 3.685  | 4.114  |
| 4 | 0.7722 | 14.613 | 12.149 | 19.478 | 3.390  | 13.981 |
| 4 | 0.7732 | 19.093 | 13.476 | 14.384 | 10.488 | 12.267 |
| 4 | 0.7742 | 7.767  | 6.750  | 6.673  | 9.002  | 12.321 |

|   |        |        |        |        |        |        |
|---|--------|--------|--------|--------|--------|--------|
| 4 | 0.7752 | 7.730  | 7.474  | 10.882 | 7.591  | 8.961  |
| 4 | 0.7762 | 9.317  | 10.858 | 11.355 | 15.736 | 18.702 |
| 4 | 0.7772 | 16.419 | 9.985  | 13.698 | 10.340 | 9.247  |
| 4 | 0.7782 | 13.295 | 12.540 | 12.457 | 10.094 | 5.443  |
| 4 | 0.7792 | 6.262  | 5.595  | 7.528  | 4.755  | 6.109  |
| 4 | 0.7802 | 1.979  | 5.889  | 2.467  | 6.334  | 1.259  |
| 4 | 0.7812 | 5.146  | 6.621  | 2.481  | 3.808  | 5.735  |
| 4 | 0.7822 | 11.777 | 10.396 | 9.762  | 9.821  | 12.436 |
| 4 | 0.7832 | 8.162  | 8.692  | 8.127  | 6.221  | 10.975 |
| 4 | 0.7842 | 6.940  | 8.371  | 12.346 | 5.880  | 8.197  |
| 4 | 0.7852 | 10.696 | 10.823 | 13.904 | 0.740  | 1.978  |
| 4 | 0.7862 | 9.169  | 8.554  | 10.635 | 6.023  | 4.264  |
| 4 | 0.7872 | 6.100  | 5.802  | 2.630  | 5.711  | 10.833 |
| 4 | 0.7882 | 13.215 | 10.487 | 17.453 | 10.177 | 8.587  |
| 4 | 0.7892 | 12.123 | 11.576 | 12.285 | 18.355 | 15.581 |
| 4 | 0.7902 | 9.043  | 8.098  | 7.451  | 19.206 | 9.869  |
| 4 | 0.7912 | 25.727 | 21.191 | 20.679 | 8.728  | 8.927  |
| 4 | 0.7922 | 9.484  | 9.487  | 12.254 | 4.002  | 7.836  |
| 4 | 0.7932 | 17.420 | 13.627 | 18.410 | 12.900 | 10.311 |
| 4 | 0.7942 | 9.290  | 3.967  | 13.704 | 6.963  | 10.853 |
| 4 | 0.7952 | 10.676 | 6.981  | 15.551 | 5.570  | 10.417 |
| 4 | 0.7962 | 15.227 | 15.250 | 15.383 | 8.407  | 19.945 |
| 4 | 0.7972 | 15.666 | 13.879 | 16.901 | 13.994 | 21.981 |
| 4 | 0.7982 | 6.921  | 9.025  | 10.659 | 14.532 | 13.672 |
| 4 | 0.7992 | 6.176  | 11.043 | 14.285 | 11.332 | 16.654 |
| 4 | 0.8002 | 10.421 | 10.476 | 10.546 | 12.102 | 11.688 |
| 4 | 0.8012 | 7.481  | 6.985  | 6.590  | 15.526 | 22.149 |
| 4 | 0.8022 | 6.750  | 6.441  | 5.845  | 13.338 | 17.750 |
| 4 | 0.8032 | 15.550 | 12.523 | 14.100 | 14.077 | 11.934 |
| 4 | 0.8042 | 13.666 | 9.438  | 11.608 | 11.931 | 9.429  |
| 4 | 0.8052 | 13.374 | 13.282 | 13.003 | 19.502 | 14.166 |
| 4 | 0.8062 | 14.769 | 9.931  | 15.093 | 8.080  | 10.870 |
| 4 | 0.8072 | 11.047 | 5.871  | 9.601  | 5.724  | 7.011  |
| 4 | 0.8082 | 5.723  | 8.050  | 5.177  | 8.961  | 8.952  |
| 4 | 0.8092 | 11.625 | 5.174  | 6.835  | 7.594  | 14.582 |
| 4 | 0.8102 | 12.072 | 11.378 | 9.349  | 11.118 | 14.976 |
| 4 | 0.8112 | 7.461  | 13.469 | 11.439 | 9.013  | 7.626  |
| 4 | 0.8122 | 18.560 | 17.343 | 19.247 | 10.779 | 12.835 |
| 4 | 0.8132 | 16.697 | 20.349 | 14.680 | 13.090 | 15.098 |
| 4 | 0.8142 | 15.272 | 16.560 | 11.810 | 8.627  | 16.191 |
| 4 | 0.8152 | 10.498 | 12.927 | 8.280  | 8.471  | 9.391  |
| 4 | 0.8162 | 15.971 | 10.727 | 14.810 | 26.989 | 21.510 |
| 4 | 0.8172 | 14.589 | 14.909 | 13.564 | 13.697 | 12.768 |
| 4 | 0.8182 | 7.595  | 7.789  | 7.829  | 13.840 | 10.681 |
| 4 | 0.8192 | 14.103 | 11.097 | 16.442 | 22.801 | 13.989 |
| 4 | 0.8202 | 13.987 | 10.873 | 13.850 | 11.501 | 20.928 |
| 4 | 0.8212 | 8.699  | 11.213 | 10.549 | 15.781 | 11.785 |
| 4 | 0.8222 | 7.800  | 9.774  | 8.002  | 11.526 | 7.176  |
| 4 | 0.8232 | 7.475  | 9.698  | 8.392  | 22.105 | 11.618 |
| 4 | 0.8242 | 4.505  | 7.940  | 4.032  | 13.792 | 11.524 |



|   |        |        |        |        |        |        |
|---|--------|--------|--------|--------|--------|--------|
| 4 | 0.8252 | 3.882  | 8.191  | 8.649  | 9.609  | 11.492 |
| 4 | 0.8262 | 14.045 | 14.382 | 15.462 | 11.491 | 10.690 |
| 4 | 0.8272 | 14.908 | 14.878 | 9.651  | 18.643 | 19.103 |
| 4 | 0.8282 | 5.477  | 13.536 | 5.225  | 18.302 | 11.861 |
| 4 | 0.8292 | 6.770  | 15.299 | 8.315  | 24.174 | 7.073  |
| 4 | 0.8302 | 3.825  | 10.518 | 6.630  | 11.782 | 4.817  |
| 4 | 0.8312 | 9.670  | 15.269 | 9.578  | 12.203 | 3.078  |
| 4 | 0.8322 | 11.107 | 14.184 | 8.243  | 12.820 | 3.926  |
| 4 | 0.8332 | 12.636 | 14.340 | 12.664 | 20.226 | 7.306  |
| 4 | 0.8342 | 19.860 | 20.160 | 16.066 | 24.653 | 20.449 |
| 4 | 0.8352 | 20.460 | 25.177 | 19.549 | 15.473 | 12.507 |
| 4 | 0.8362 | 13.240 | 8.527  | 10.380 | 14.624 | 11.155 |
| 4 | 0.8372 | 16.861 | 19.825 | 13.072 | 10.660 | 15.970 |
| 4 | 0.8382 | 15.485 | 8.593  | 11.517 | 11.784 | 15.266 |
| 4 | 0.8392 | 15.400 | 8.577  | 11.450 | 11.722 | 15.264 |
| 4 | 0.8402 | 11.265 | 9.423  | 8.749  | 14.473 | 17.327 |
| 4 | 0.8412 | 6.012  | 16.743 | 11.662 | 9.883  | 13.998 |
| 4 | 0.8422 | 6.009  | 16.749 | 11.631 | 9.930  | 14.112 |
| 4 | 0.8432 | 19.669 | 12.288 | 18.526 | 10.926 | 14.771 |
| 4 | 0.8442 | 19.445 | 19.481 | 13.450 | 14.278 | 24.757 |
| 4 | 0.8452 | 15.594 | 11.133 | 12.426 | 22.675 | 29.753 |
| 4 | 0.8462 | 25.809 | 24.766 | 18.353 | 22.407 | 22.032 |
| 4 | 0.8472 | 6.368  | 12.333 | 8.186  | 28.883 | 19.059 |
| 4 | 0.8482 | 20.956 | 18.357 | 14.378 | 17.818 | 26.138 |
| 4 | 0.8492 | 15.674 | 16.613 | 10.526 | 34.518 | 17.926 |
| 4 | 0.8502 | 17.301 | 16.953 | 16.092 | 23.759 | 23.724 |
| 4 | 0.8512 | 15.697 | 18.534 | 12.185 | 22.394 | 25.064 |
| 4 | 0.8522 | 8.590  | 11.382 | 11.965 | 18.961 | 17.319 |
| 4 | 0.8532 | 7.850  | 9.746  | 9.531  | 10.600 | 10.441 |
| 4 | 0.8542 | 22.465 | 22.354 | 13.859 | 25.032 | 19.918 |
| 4 | 0.8552 | 11.318 | 9.116  | 11.453 | 13.308 | 11.614 |
| 4 | 0.8562 | 13.962 | 16.487 | 16.663 | 17.400 | 20.058 |
| 4 | 0.8572 | 11.080 | 11.816 | 11.496 | 10.650 | 16.599 |
| 4 | 0.8582 | 21.546 | 18.885 | 15.981 | 20.541 | 21.569 |
| 4 | 0.8592 | 24.627 | 31.013 | 25.246 | 16.133 | 19.325 |
| 4 | 0.8602 | 14.638 | 19.558 | 12.879 | 12.624 | 21.091 |
| 4 | 0.8612 | 8.440  | 5.328  | 5.480  | 11.374 | 17.686 |
| 4 | 0.8622 | 9.383  | 10.977 | 10.209 | 11.682 | 12.906 |
| 4 | 0.8632 | 12.602 | 13.412 | 12.314 | 16.707 | 10.074 |
| 4 | 0.8642 | 4.010  | 3.692  | 6.669  | 6.799  | 5.824  |
| 4 | 0.8652 | 12.669 | 10.303 | 10.320 | 14.860 | 16.132 |
| 4 | 0.8662 | 18.161 | 15.435 | 11.627 | 9.274  | 18.205 |
| 4 | 0.8672 | 12.975 | 12.098 | 7.660  | 7.393  | 14.829 |
| 4 | 0.8682 | 15.564 | 17.373 | 16.728 | 12.584 | 16.299 |
| 4 | 0.8692 | 17.071 | 8.702  | 14.638 | 20.296 | 24.754 |
| 4 | 0.8702 | 16.256 | 15.555 | 13.731 | 12.669 | 16.350 |
| 4 | 0.8712 | 19.562 | 19.295 | 22.157 | 10.418 | 11.632 |
| 4 | 0.8722 | 6.396  | 10.549 | 11.894 | 16.347 | 18.795 |
| 4 | 0.8732 | 10.077 | 8.298  | 12.092 | 13.616 | 14.116 |
| 4 | 0.8742 | 8.436  | 10.854 | 11.698 | 11.046 | 9.511  |

|   |        |        |        |        |        |        |
|---|--------|--------|--------|--------|--------|--------|
| 4 | 0.8752 | 29.488 | 30.835 | 28.992 | 14.053 | 12.923 |
| 4 | 0.8762 | 27.341 | 32.734 | 30.495 | 13.368 | 17.634 |
| 4 | 0.8772 | 20.703 | 21.768 | 21.476 | 11.922 | 18.025 |
| 4 | 0.8782 | 18.811 | 16.907 | 22.523 | 6.185  | 12.706 |
| 4 | 0.8792 | 15.546 | 16.898 | 20.150 | 5.635  | 11.591 |
| 4 | 0.8802 | 22.944 | 20.127 | 23.327 | 16.462 | 17.276 |
| 4 | 0.8812 | 23.612 | 29.926 | 29.338 | 8.387  | 17.331 |
| 4 | 0.8822 | 17.032 | 16.449 | 19.240 | 7.616  | 10.136 |
| 4 | 0.8832 | 16.407 | 13.141 | 14.125 | 13.363 | 10.311 |
| 4 | 0.8842 | 16.846 | 20.520 | 16.812 | 8.457  | 12.880 |
| 4 | 0.8852 | 17.826 | 21.938 | 21.332 | 6.831  | 14.434 |
| 4 | 0.8862 | 19.573 | 18.387 | 22.787 | 13.015 | 20.863 |
| 4 | 0.8872 | 12.927 | 15.878 | 21.340 | 13.579 | 9.683  |
| 4 | 0.8882 | 20.202 | 24.404 | 20.233 | 8.234  | 8.952  |
| 4 | 0.8892 | 14.888 | 13.090 | 16.785 | 14.771 | 10.718 |
| 4 | 0.8902 | 31.811 | 29.749 | 28.124 | 11.523 | 7.361  |
| 4 | 0.8912 | 27.215 | 27.241 | 23.607 | 13.616 | 11.676 |
| 4 | 0.8922 | 14.597 | 16.174 | 20.653 | 13.501 | 16.415 |
| 4 | 0.8932 | 8.601  | 14.014 | 12.770 | 13.441 | 17.214 |
| 4 | 0.8942 | 14.095 | 18.646 | 14.904 | 17.744 | 7.467  |
| 4 | 0.8952 | 16.791 | 18.887 | 18.178 | 6.461  | 5.850  |
| 4 | 0.8962 | 17.920 | 20.674 | 22.065 | 10.200 | 7.646  |
| 4 | 0.8972 | 16.200 | 16.656 | 17.661 | 5.951  | 11.709 |
| 4 | 0.8982 | 14.607 | 13.994 | 15.526 | 9.128  | 11.529 |
| 4 | 0.8992 | 12.701 | 14.599 | 15.997 | 7.909  | 10.578 |
| 4 | 0.9002 | 20.868 | 25.147 | 23.869 | 10.378 | 17.937 |
| 4 | 0.9012 | 8.321  | 13.195 | 17.868 | 13.569 | 27.184 |
| 4 | 0.9022 | 9.563  | 13.922 | 19.684 | 16.020 | 22.305 |
| 4 | 0.9032 | 9.611  | 14.035 | 19.736 | 16.081 | 22.407 |
| 4 | 0.9042 | 6.313  | 9.656  | 10.180 | 11.880 | 16.570 |
| 4 | 0.9052 | 6.954  | 9.784  | 7.175  | 13.429 | 12.215 |
| 4 | 0.9062 | 11.406 | 11.786 | 16.475 | 6.136  | 13.296 |
| 4 | 0.9072 | 12.386 | 12.162 | 13.674 | 8.715  | 8.425  |
| 4 | 0.9082 | 13.941 | 12.686 | 12.759 | 4.963  | 5.771  |
| 4 | 0.9092 | 14.496 | 17.279 | 21.061 | 8.460  | 19.042 |
| 4 | 0.9102 | 19.332 | 17.684 | 23.923 | 18.053 | 17.923 |
| 4 | 0.9112 | 13.575 | 8.008  | 13.809 | 11.075 | 13.079 |
| 4 | 0.9122 | 13.254 | 11.536 | 16.459 | 7.091  | 6.431  |
| 4 | 0.9132 | 18.104 | 17.715 | 24.161 | 8.691  | 10.539 |
| 4 | 0.9142 | 3.767  | 2.535  | 5.990  | 3.723  | 11.214 |
| 4 | 0.9152 | 6.806  | 9.349  | 11.749 | 3.046  | 14.288 |
| 4 | 0.9162 | 7.963  | 11.804 | 8.445  | 3.918  | 13.151 |
| 4 | 0.9172 | 7.062  | 9.189  | 9.707  | 6.801  | 4.529  |
| 4 | 0.9182 | 5.930  | 6.572  | 8.977  | 6.313  | 4.618  |
| 4 | 0.9192 | 1.579  | 4.735  | 4.019  | 5.319  | 4.439  |
| 4 | 0.9202 | 4.084  | 10.526 | 8.797  | 8.259  | 22.660 |
| 4 | 0.9212 | 22.725 | 19.650 | 26.550 | 10.309 | 31.834 |
| 4 | 0.9222 | 14.411 | 18.113 | 18.648 | 14.798 | 19.303 |
| 4 | 0.9232 | 8.882  | 15.366 | 12.863 | 8.692  | 11.706 |
| 4 | 0.9242 | 10.964 | 20.282 | 16.942 | 17.257 | 14.797 |

|   |        |        |        |        |        |        |
|---|--------|--------|--------|--------|--------|--------|
| 4 | 0.9252 | 4.838  | 7.186  | 5.005  | 10.100 | 6.884  |
| 4 | 0.9262 | 4.525  | 4.927  | 5.787  | 2.066  | 2.850  |
| 4 | 0.9272 | 7.060  | 6.977  | 10.252 | 5.150  | 5.706  |
| 4 | 0.9282 | 9.809  | 12.008 | 13.692 | 9.192  | 12.442 |
| 4 | 0.9292 | 9.157  | 10.035 | 10.478 | 11.472 | 6.763  |
| 4 | 0.9302 | 9.677  | 8.490  | 12.818 | 4.915  | 5.919  |
| 4 | 0.9312 | 30.142 | 25.661 | 31.407 | 18.376 | 19.875 |
| 4 | 0.9322 | 16.888 | 18.808 | 19.254 | 8.958  | 9.681  |
| 4 | 0.9332 | 11.190 | 18.026 | 22.009 | 10.121 | 8.107  |
| 4 | 0.9342 | 8.263  | 11.969 | 15.636 | 9.918  | 4.320  |
| 4 | 0.9352 | 23.598 | 18.621 | 22.299 | 14.357 | 9.984  |
| 4 | 0.9362 | 18.626 | 20.538 | 28.120 | 9.617  | 21.664 |
| 4 | 0.9372 | 15.847 | 15.310 | 19.569 | 7.425  | 10.689 |
| 4 | 0.9382 | 19.446 | 16.904 | 20.046 | 14.819 | 8.174  |
| 4 | 0.9392 | 9.583  | 13.487 | 11.763 | 12.800 | 5.971  |
| 4 | 0.9402 | 10.822 | 16.914 | 16.021 | 15.163 | 6.312  |
| 4 | 0.9412 | 16.841 | 24.359 | 28.234 | 14.699 | 11.092 |
| 4 | 0.9422 | 14.498 | 22.538 | 16.644 | 26.262 | 6.378  |
| 4 | 0.9432 | 6.530  | 12.256 | 7.407  | 14.585 | 4.669  |
| 4 | 0.9442 | 5.462  | 7.319  | 8.860  | 10.252 | 9.783  |
| 4 | 0.9452 | 6.636  | 8.222  | 6.769  | 15.169 | 25.163 |
| 4 | 0.9462 | 16.900 | 19.510 | 15.311 | 16.985 | 12.833 |
| 4 | 0.9472 | 10.787 | 12.808 | 11.308 | 14.683 | 10.540 |
| 4 | 0.9482 | 9.124  | 12.430 | 7.129  | 18.338 | 14.948 |
| 4 | 0.9492 | 13.613 | 20.353 | 15.562 | 23.759 | 22.855 |
| 4 | 0.9502 | 12.097 | 13.374 | 9.884  | 11.983 | 5.933  |
| 4 | 0.9512 | 16.729 | 22.661 | 11.417 | 9.933  | 9.008  |
| 4 | 0.9522 | 11.711 | 15.698 | 14.769 | 13.963 | 8.132  |
| 4 | 0.9532 | 6.624  | 17.475 | 12.782 | 17.673 | 7.046  |
| 4 | 0.9542 | 12.745 | 21.560 | 17.426 | 14.285 | 9.982  |
| 4 | 0.9552 | 24.393 | 28.064 | 31.205 | 18.713 | 18.147 |
| 4 | 0.9562 | 25.790 | 34.568 | 30.787 | 14.461 | 13.909 |
| 4 | 0.9572 | 15.311 | 18.006 | 18.264 | 21.590 | 15.516 |
| 4 | 0.9582 | 20.430 | 19.134 | 27.340 | 11.727 | 13.512 |
| 4 | 0.9592 | 27.860 | 31.011 | 27.561 | 20.004 | 10.089 |
| 4 | 0.9602 | 27.147 | 39.099 | 32.294 | 19.902 | 7.949  |
| 4 | 0.9612 | 16.065 | 25.552 | 16.862 | 15.890 | 7.139  |
| 4 | 0.9622 | 21.333 | 30.898 | 19.634 | 22.784 | 19.304 |
| 4 | 0.9632 | 12.811 | 20.218 | 9.233  | 14.842 | 16.388 |
| 4 | 0.9642 | 7.679  | 6.947  | 4.655  | 8.998  | 6.053  |
| 4 | 0.9652 | 4.254  | 4.122  | 3.520  | 12.911 | 15.056 |
| 4 | 0.9662 | 11.731 | 19.193 | 12.299 | 12.434 | 15.787 |
| 4 | 0.9672 | 14.399 | 17.958 | 15.562 | 22.703 | 14.261 |
| 4 | 0.9682 | 21.084 | 18.087 | 18.396 | 21.656 | 15.665 |
| 4 | 0.9692 | 28.094 | 29.544 | 23.239 | 20.768 | 15.877 |
| 4 | 0.9702 | 23.976 | 19.231 | 22.616 | 13.632 | 8.968  |
| 4 | 0.9712 | 21.770 | 19.634 | 21.897 | 9.011  | 8.936  |
| 4 | 0.9722 | 4.196  | 6.405  | 6.117  | 1.959  | 7.589  |
| 4 | 0.9732 | 4.743  | 7.458  | 6.567  | 1.312  | 8.596  |
| 4 | 0.9742 | 7.644  | 10.925 | 8.417  | 3.573  | 13.706 |

|   |        |        |        |        |        |        |
|---|--------|--------|--------|--------|--------|--------|
| 4 | 0.9752 | 9.881  | 11.343 | 8.109  | 7.443  | 10.786 |
| 4 | 0.9762 | 5.573  | 4.303  | 3.994  | 2.915  | 5.910  |
| 4 | 0.9772 | 34.066 | 35.773 | 33.294 | 14.895 | 12.166 |
| 4 | 0.9782 | 17.909 | 23.583 | 17.226 | 13.347 | 9.879  |
| 4 | 0.9792 | 11.268 | 18.196 | 6.988  | 17.536 | 10.203 |
| 4 | 0.9802 | 23.222 | 24.030 | 22.352 | 18.259 | 15.715 |
| 4 | 0.9812 | 21.910 | 21.371 | 24.232 | 11.858 | 11.153 |
| 4 | 0.9822 | 8.841  | 14.429 | 9.111  | 21.855 | 10.601 |
| 4 | 0.9832 | 11.369 | 14.003 | 13.677 | 16.352 | 6.235  |
| 4 | 0.9842 | 16.122 | 26.647 | 18.814 | 23.713 | 9.634  |
| 4 | 0.9852 | 14.495 | 23.698 | 14.297 | 21.375 | 8.205  |
| 4 | 0.9862 | 12.662 | 27.825 | 14.623 | 26.710 | 6.456  |
| 4 | 0.9872 | 23.623 | 28.350 | 22.049 | 25.806 | 23.263 |
| 4 | 0.9882 | 26.481 | 27.572 | 27.230 | 12.681 | 12.637 |
| 4 | 0.9892 | 12.281 | 11.228 | 10.442 | 1.273  | 4.447  |
| 4 | 0.9902 | 8.794  | 8.187  | 7.964  | 14.251 | 10.052 |
| 4 | 0.9912 | 13.544 | 19.964 | 14.382 | 16.427 | 9.888  |
| 4 | 0.9922 | 3.166  | 12.407 | 5.450  | 12.813 | 3.217  |
| 4 | 0.9932 | 3.301  | 9.018  | 5.029  | 5.735  | 7.610  |
| 4 | 0.9942 | 8.452  | 11.273 | 14.337 | 21.357 | 20.329 |
| 4 | 0.9952 | 9.580  | 19.942 | 11.724 | 29.793 | 23.443 |
| 4 | 0.9962 | 15.820 | 20.343 | 13.470 | 19.389 | 15.761 |
| 4 | 0.9972 | 15.349 | 18.007 | 11.352 | 12.688 | 9.181  |
| 4 | 0.9982 | 6.394  | 9.657  | 4.950  | 7.186  | 10.179 |
| 4 | 0.9992 | 16.315 | 15.325 | 13.221 | 9.156  | 3.563  |
| 4 | 1.0002 | 5.230  | 6.399  | 7.574  | 6.994  | 2.168  |
| 4 | 1.0012 | 10.292 | 12.460 | 11.001 | 11.752 | 6.426  |
| 4 | 1.0022 | 19.954 | 24.973 | 21.043 | 19.788 | 21.256 |
| 4 | 1.0032 | 16.124 | 21.105 | 15.949 | 21.393 | 21.190 |
| 4 | 1.0042 | 14.715 | 20.368 | 17.140 | 19.749 | 11.855 |
| 4 | 1.0052 | 11.322 | 15.947 | 12.390 | 15.827 | 7.630  |
| 4 | 1.0062 | 11.235 | 10.748 | 13.044 | 28.546 | 8.623  |
| 4 | 1.0072 | 21.872 | 36.312 | 30.790 | 22.704 | 21.650 |
| 4 | 1.0082 | 21.635 | 28.022 | 25.626 | 21.315 | 16.680 |
| 4 | 1.0092 | 21.772 | 24.724 | 20.622 | 18.413 | 11.270 |
| 4 | 1.0102 | 15.581 | 21.024 | 18.513 | 14.218 | 7.968  |
| 4 | 1.0112 | 13.930 | 18.480 | 20.128 | 14.994 | 6.271  |
| 4 | 1.0122 | 10.333 | 11.962 | 12.776 | 10.555 | 1.379  |
| 4 | 1.0132 | 11.626 | 17.229 | 16.455 | 11.605 | 5.757  |
| 4 | 1.0142 | 20.811 | 37.350 | 26.660 | 19.519 | 16.816 |
| 4 | 1.0152 | 18.130 | 24.143 | 21.552 | 11.926 | 7.688  |
| 4 | 1.0162 | 5.912  | 9.686  | 9.331  | 11.482 | 5.360  |
| 4 | 1.0172 | 12.053 | 18.585 | 15.837 | 22.630 | 7.745  |
| 4 | 1.0182 | 24.503 | 27.279 | 24.709 | 21.943 | 6.476  |
| 4 | 1.0192 | 9.187  | 7.551  | 10.037 | 11.323 | 23.791 |
| 4 | 1.0202 | 11.235 | 12.392 | 12.841 | 7.070  | 10.560 |
| 4 | 1.0212 | 8.675  | 10.260 | 13.645 | 10.980 | 18.558 |
| 4 | 1.0222 | 21.176 | 31.863 | 24.858 | 30.261 | 19.281 |
| 4 | 1.0232 | 27.238 | 31.326 | 23.006 | 32.576 | 24.417 |
| 4 | 1.0242 | 15.128 | 17.848 | 15.717 | 36.653 | 11.524 |

|   |        |        |        |        |        |        |
|---|--------|--------|--------|--------|--------|--------|
| 4 | 1.0252 | 19.532 | 18.457 | 23.356 | 39.882 | 27.273 |
| 4 | 1.0262 | 19.303 | 18.305 | 23.106 | 39.718 | 27.390 |
| 4 | 1.0272 | 22.961 | 27.200 | 25.400 | 48.346 | 17.347 |
| 4 | 1.0282 | 23.127 | 27.253 | 25.583 | 48.275 | 17.532 |
| 4 | 1.0292 | 21.082 | 13.780 | 19.216 | 24.416 | 28.475 |
| 4 | 1.0302 | 10.966 | 7.250  | 10.056 | 20.507 | 21.848 |
| 4 | 1.0312 | 9.132  | 8.327  | 10.098 | 14.655 | 17.931 |
| 4 | 1.0322 | 20.468 | 16.046 | 18.832 | 15.685 | 20.380 |
| 4 | 1.0332 | 24.595 | 9.941  | 27.023 | 20.336 | 7.645  |
| 4 | 1.0342 | 16.486 | 9.031  | 20.804 | 25.745 | 10.838 |
| 4 | 1.0352 | 12.092 | 18.294 | 11.592 | 22.909 | 11.411 |
| 4 | 1.0362 | 14.629 | 12.494 | 13.674 | 26.723 | 18.322 |
| 4 | 1.0372 | 15.419 | 13.608 | 11.830 | 25.724 | 21.918 |
| 4 | 1.0382 | 20.345 | 16.652 | 22.401 | 16.533 | 18.965 |
| 4 | 1.0392 | 20.393 | 16.794 | 22.423 | 16.440 | 18.988 |
| 4 | 1.0402 | 20.451 | 16.936 | 22.451 | 16.356 | 19.012 |
| 4 | 1.0412 | 10.658 | 13.090 | 13.151 | 23.643 | 8.689  |
| 4 | 1.0422 | 13.718 | 12.373 | 11.437 | 13.918 | 4.093  |
| 4 | 1.0432 | 14.714 | 16.275 | 14.884 | 16.670 | 11.112 |
| 4 | 1.0442 | 19.656 | 21.152 | 26.235 | 12.657 | 15.662 |
| 4 | 1.0452 | 23.076 | 26.013 | 24.031 | 12.399 | 22.929 |
| 4 | 1.0462 | 12.600 | 15.934 | 8.916  | 22.896 | 11.800 |
| 4 | 1.0472 | 10.574 | 18.755 | 10.524 | 20.987 | 13.337 |
| 4 | 1.0482 | 5.764  | 18.566 | 10.427 | 14.086 | 10.828 |
| 4 | 1.0492 | 11.976 | 19.365 | 9.806  | 17.852 | 9.916  |
| 4 | 1.0502 | 10.144 | 13.270 | 11.740 | 12.978 | 16.702 |
| 4 | 1.0512 | 9.157  | 14.752 | 10.354 | 12.081 | 17.436 |
| 4 | 1.0522 | 11.937 | 15.793 | 12.793 | 10.639 | 16.988 |
| 4 | 1.0532 | 16.823 | 14.662 | 13.966 | 12.421 | 21.598 |
| 4 | 1.0542 | 17.074 | 14.856 | 14.078 | 12.229 | 21.818 |
| 4 | 1.0552 | 16.219 | 17.875 | 12.874 | 9.927  | 22.491 |
| 4 | 1.0562 | 8.909  | 13.363 | 5.668  | 12.296 | 11.492 |
| 4 | 1.0572 | 31.291 | 21.151 | 20.929 | 13.820 | 11.659 |
| 4 | 1.0582 | 18.603 | 23.423 | 13.398 | 27.153 | 18.099 |
| 4 | 1.0592 | 21.610 | 21.967 | 15.283 | 12.917 | 24.218 |
| 4 | 1.0602 | 14.270 | 18.686 | 14.328 | 16.191 | 7.639  |
| 4 | 1.0612 | 15.558 | 17.423 | 10.923 | 23.076 | 21.455 |
| 4 | 1.0622 | 15.913 | 22.328 | 13.687 | 17.454 | 10.661 |
| 4 | 1.0632 | 8.608  | 12.454 | 6.583  | 10.660 | 15.800 |
| 4 | 1.0642 | 19.012 | 23.236 | 16.289 | 11.465 | 13.116 |
| 4 | 1.0652 | 18.982 | 23.265 | 16.092 | 11.325 | 13.165 |
| 4 | 1.0662 | 17.782 | 25.779 | 19.844 | 15.325 | 15.419 |
| 4 | 1.0672 | 15.356 | 31.726 | 19.135 | 16.837 | 9.791  |
| 4 | 1.0682 | 11.092 | 13.776 | 10.247 | 15.463 | 13.522 |
| 4 | 1.0692 | 21.063 | 21.700 | 19.890 | 11.362 | 14.401 |
| 4 | 1.0702 | 12.120 | 14.229 | 16.004 | 27.986 | 9.974  |
| 4 | 1.0712 | 14.010 | 25.559 | 18.613 | 19.241 | 7.775  |
| 4 | 1.0722 | 12.973 | 11.121 | 13.316 | 23.955 | 22.485 |
| 4 | 1.0732 | 14.837 | 17.161 | 13.499 | 13.452 | 14.039 |
| 4 | 1.0742 | 19.852 | 15.216 | 11.293 | 12.628 | 12.198 |

|   |        |        |        |        |        |        |
|---|--------|--------|--------|--------|--------|--------|
| 4 | 1.0752 | 23.941 | 21.680 | 24.791 | 23.427 | 12.965 |
| 4 | 1.0762 | 19.472 | 23.812 | 21.202 | 13.456 | 14.956 |
| 4 | 1.0772 | 15.518 | 15.119 | 11.548 | 24.095 | 19.846 |
| 4 | 1.0782 | 16.018 | 20.798 | 16.639 | 25.515 | 10.580 |
| 4 | 1.0792 | 11.373 | 16.808 | 12.846 | 16.017 | 8.799  |
| 4 | 1.0802 | 11.231 | 16.237 | 14.530 | 20.987 | 19.660 |
| 4 | 1.0812 | 18.732 | 21.659 | 18.517 | 11.138 | 20.344 |
| 4 | 1.0822 | 18.888 | 18.480 | 18.020 | 17.752 | 5.543  |
| 4 | 1.0832 | 15.509 | 16.453 | 15.539 | 23.725 | 17.295 |
| 4 | 1.0842 | 8.737  | 12.348 | 10.474 | 20.990 | 15.091 |
| 4 | 1.0852 | 10.737 | 12.322 | 12.155 | 19.044 | 11.416 |
| 4 | 1.0862 | 7.106  | 9.067  | 7.982  | 18.898 | 6.236  |
| 4 | 1.0872 | 13.595 | 13.151 | 14.040 | 18.545 | 16.521 |
| 4 | 1.0882 | 11.620 | 10.542 | 11.770 | 13.616 | 19.806 |
| 4 | 1.0892 | 10.920 | 8.923  | 11.571 | 6.265  | 5.512  |
| 4 | 1.0902 | 11.757 | 10.512 | 8.792  | 10.731 | 15.506 |
| 4 | 1.0912 | 5.126  | 7.803  | 4.855  | 23.563 | 24.922 |
| 4 | 1.0922 | 11.429 | 17.246 | 10.719 | 24.310 | 18.574 |
| 4 | 1.0932 | 15.232 | 14.789 | 15.116 | 14.803 | 17.230 |
| 4 | 1.0942 | 9.217  | 11.307 | 10.869 | 12.123 | 7.472  |
| 4 | 1.0952 | 13.143 | 18.346 | 14.003 | 14.145 | 10.033 |
| 4 | 1.0962 | 20.896 | 21.554 | 16.697 | 24.505 | 17.277 |
| 4 | 1.0972 | 21.008 | 21.598 | 16.755 | 24.712 | 17.622 |
| 4 | 1.0982 | 20.251 | 18.370 | 14.316 | 17.293 | 11.702 |
| 4 | 1.0992 | 20.340 | 18.380 | 14.366 | 17.315 | 11.873 |
| 4 | 1.1002 | 11.362 | 6.074  | 6.483  | 8.935  | 10.306 |
| 4 | 1.1012 | 7.705  | 14.546 | 9.382  | 17.269 | 13.397 |
| 4 | 1.1022 | 7.592  | 14.418 | 9.280  | 17.277 | 13.514 |
| 4 | 1.1032 | 11.099 | 14.787 | 10.653 | 35.785 | 16.833 |
| 4 | 1.1042 | 8.924  | 14.318 | 9.403  | 18.668 | 6.491  |
| 4 | 1.1052 | 6.580  | 20.186 | 11.485 | 24.191 | 23.392 |
| 4 | 1.1062 | 4.538  | 10.198 | 5.559  | 21.098 | 24.085 |
| 4 | 1.1072 | 11.559 | 10.357 | 10.204 | 15.751 | 32.877 |
| 4 | 1.1082 | 8.776  | 12.817 | 6.115  | 12.656 | 20.779 |
| 4 | 1.1092 | 11.497 | 6.406  | 5.844  | 7.431  | 9.999  |
| 4 | 1.1102 | 14.448 | 6.314  | 4.437  | 10.410 | 22.771 |
| 4 | 1.1112 | 13.509 | 14.038 | 8.979  | 22.750 | 38.005 |
| 4 | 1.1122 | 9.347  | 13.187 | 9.610  | 11.398 | 21.905 |
| 4 | 1.1132 | 11.635 | 7.736  | 7.015  | 12.434 | 16.700 |
| 4 | 1.1142 | 15.151 | 21.437 | 20.999 | 11.594 | 16.099 |
| 4 | 1.1152 | 5.558  | 13.551 | 3.925  | 20.907 | 16.367 |
| 4 | 1.1162 | 14.164 | 15.280 | 9.629  | 21.712 | 19.754 |
| 4 | 1.1172 | 11.762 | 12.936 | 7.151  | 12.943 | 19.513 |
| 4 | 1.1182 | 7.747  | 15.533 | 7.822  | 13.063 | 13.032 |
| 4 | 1.1192 | 10.310 | 13.903 | 10.840 | 18.259 | 17.352 |
| 4 | 1.1202 | 3.507  | 7.622  | 4.940  | 22.642 | 12.354 |
| 4 | 1.1212 | 9.088  | 11.623 | 7.303  | 23.382 | 12.377 |
| 4 | 1.1222 | 6.458  | 6.295  | 6.032  | 12.382 | 10.989 |
| 4 | 1.1232 | 5.609  | 9.981  | 7.212  | 15.674 | 18.697 |
| 4 | 1.1242 | 3.172  | 7.959  | 5.083  | 12.902 | 12.945 |

|   |        |        |        |        |        |        |
|---|--------|--------|--------|--------|--------|--------|
| 4 | 1.1252 | 5.355  | 9.299  | 6.291  | 13.686 | 9.083  |
| 4 | 1.1262 | 10.461 | 12.748 | 10.795 | 11.353 | 11.231 |
| 4 | 1.1272 | 9.973  | 13.118 | 10.616 | 11.829 | 6.024  |
| 4 | 1.1282 | 6.202  | 7.026  | 7.525  | 8.331  | 18.201 |
| 4 | 1.1292 | 5.068  | 9.644  | 9.404  | 13.658 | 16.442 |
| 4 | 1.1302 | 6.712  | 12.054 | 6.482  | 13.048 | 11.040 |
| 4 | 1.1312 | 4.058  | 12.488 | 7.138  | 19.371 | 13.231 |
| 4 | 1.1322 | 8.592  | 15.726 | 9.445  | 20.360 | 6.297  |
| 4 | 1.1332 | 6.974  | 11.644 | 10.364 | 9.837  | 12.690 |
| 4 | 1.1342 | 4.564  | 4.830  | 4.935  | 11.970 | 14.648 |
| 4 | 1.1352 | 10.945 | 7.794  | 8.691  | 12.031 | 14.892 |
| 4 | 1.1362 | 7.864  | 8.070  | 7.418  | 9.691  | 17.109 |
| 4 | 1.1372 | 7.955  | 8.285  | 7.508  | 9.449  | 16.149 |
| 4 | 1.1382 | 6.957  | 4.023  | 4.942  | 7.623  | 9.530  |
| 4 | 1.1392 | 5.360  | 13.459 | 8.900  | 17.738 | 4.669  |
| 4 | 1.1402 | 4.120  | 6.226  | 9.536  | 8.444  | 16.682 |
| 4 | 1.1412 | 5.101  | 12.211 | 9.594  | 15.798 | 14.448 |
| 4 | 1.1422 | 4.423  | 9.921  | 7.599  | 19.137 | 19.862 |
| 4 | 1.1432 | 4.978  | 10.200 | 6.338  | 14.195 | 13.576 |
| 4 | 1.1442 | 11.052 | 12.563 | 11.345 | 5.678  | 8.526  |
| 4 | 1.1452 | 11.042 | 14.861 | 11.762 | 14.632 | 18.038 |
| 4 | 1.1462 | 7.807  | 11.535 | 10.371 | 14.756 | 18.475 |
| 4 | 1.1472 | 14.092 | 13.775 | 14.905 | 8.754  | 3.827  |
| 4 | 1.1482 | 15.964 | 17.536 | 14.789 | 15.765 | 10.665 |
| 4 | 1.1492 | 15.937 | 17.462 | 14.781 | 15.716 | 10.768 |
| 4 | 1.1502 | 8.494  | 12.196 | 14.105 | 6.489  | 4.691  |
| 4 | 1.1512 | 10.855 | 16.085 | 16.511 | 18.823 | 21.814 |
| 4 | 1.1522 | 7.363  | 12.241 | 14.308 | 19.995 | 26.097 |
| 4 | 1.1532 | 8.974  | 13.672 | 9.909  | 25.336 | 14.963 |
| 4 | 1.1542 | 10.807 | 8.250  | 8.413  | 18.638 | 14.920 |
| 4 | 1.1552 | 7.555  | 9.097  | 7.028  | 9.927  | 6.432  |
| 4 | 1.1562 | 5.370  | 3.951  | 7.589  | 5.000  | 12.971 |
| 4 | 1.1572 | 10.624 | 9.834  | 9.135  | 7.957  | 14.179 |
| 4 | 1.1582 | 9.313  | 8.611  | 6.448  | 10.885 | 21.362 |
| 4 | 1.1592 | 0.000  | 0.000  | 0.000  | 0.000  | 0.000  |
| 5 | 0.0010 | 0.000  | 0.000  | 0.000  | 0.000  | 0.000  |
| 5 | 0.0020 | 0.000  | 0.000  | 0.000  | 0.000  | 0.000  |
| 5 | 0.0030 | 19.825 | 15.471 | 19.573 | 18.098 | 18.898 |
| 5 | 0.0040 | 12.762 | 5.631  | 10.963 | 15.497 | 17.199 |
| 5 | 0.0050 | 10.431 | 16.002 | 12.263 | 11.873 | 7.420  |
| 5 | 0.0060 | 9.330  | 16.062 | 15.176 | 20.489 | 12.235 |
| 5 | 0.0070 | 12.028 | 13.644 | 12.635 | 20.423 | 10.062 |
| 5 | 0.0080 | 7.767  | 8.113  | 8.582  | 23.662 | 16.075 |
| 5 | 0.0090 | 7.398  | 8.949  | 6.792  | 25.275 | 19.520 |
| 5 | 0.0100 | 5.915  | 10.626 | 8.570  | 17.714 | 5.679  |
| 5 | 0.0110 | 14.048 | 14.042 | 18.790 | 20.554 | 20.930 |
| 5 | 0.0120 | 20.729 | 16.145 | 23.057 | 13.559 | 20.923 |
| 5 | 0.0130 | 10.009 | 5.897  | 9.717  | 22.132 | 16.617 |
| 5 | 0.0140 | 11.631 | 5.826  | 7.799  | 18.977 | 15.698 |
| 5 | 0.0150 | 4.713  | 6.941  | 8.948  | 17.373 | 21.303 |

|   |        |        |        |        |        |        |
|---|--------|--------|--------|--------|--------|--------|
| 5 | 0.0160 | 6.932  | 9.114  | 4.434  | 16.718 | 11.947 |
| 5 | 0.0170 | 6.702  | 8.646  | 5.204  | 10.640 | 17.556 |
| 5 | 0.0180 | 13.376 | 11.812 | 13.124 | 22.596 | 13.148 |
| 5 | 0.0190 | 11.815 | 12.170 | 14.260 | 20.406 | 11.673 |
| 5 | 0.0200 | 13.071 | 12.136 | 17.504 | 24.959 | 10.870 |
| 5 | 0.0210 | 12.112 | 13.495 | 12.931 | 6.693  | 16.699 |
| 5 | 0.0220 | 13.741 | 9.757  | 14.156 | 28.167 | 26.636 |
| 5 | 0.0230 | 12.594 | 14.022 | 11.283 | 25.776 | 20.022 |
| 5 | 0.0240 | 13.210 | 14.398 | 11.352 | 17.099 | 15.471 |
| 5 | 0.0250 | 5.776  | 4.970  | 7.797  | 15.859 | 11.513 |
| 5 | 0.0260 | 7.553  | 10.403 | 9.735  | 12.273 | 24.667 |
| 5 | 0.0270 | 9.562  | 6.449  | 6.715  | 13.884 | 34.479 |
| 5 | 0.0280 | 8.267  | 6.236  | 7.433  | 11.709 | 32.256 |
| 5 | 0.0290 | 12.324 | 6.471  | 9.477  | 5.126  | 9.116  |
| 5 | 0.0300 | 10.788 | 5.849  | 5.171  | 4.324  | 15.752 |
| 5 | 0.0310 | 14.750 | 11.433 | 11.083 | 10.100 | 20.718 |
| 5 | 0.0320 | 11.757 | 11.769 | 10.552 | 9.287  | 10.468 |
| 5 | 0.0330 | 9.038  | 5.149  | 8.961  | 4.633  | 11.313 |
| 5 | 0.0340 | 14.221 | 8.659  | 10.393 | 6.157  | 10.371 |
| 5 | 0.0350 | 7.962  | 7.614  | 8.473  | 10.974 | 16.760 |
| 5 | 0.0360 | 23.536 | 18.446 | 16.033 | 12.968 | 18.231 |
| 5 | 0.0370 | 13.087 | 13.310 | 11.466 | 9.318  | 14.290 |
| 5 | 0.0380 | 13.105 | 13.136 | 10.997 | 9.306  | 13.971 |
| 5 | 0.0390 | 14.931 | 7.888  | 11.063 | 4.130  | 19.516 |
| 5 | 0.0400 | 3.574  | 7.518  | 4.175  | 10.650 | 12.117 |
| 5 | 0.0410 | 7.806  | 7.748  | 6.159  | 18.014 | 14.919 |
| 5 | 0.0420 | 7.760  | 13.008 | 10.192 | 27.400 | 9.740  |
| 5 | 0.0430 | 6.763  | 6.211  | 4.852  | 21.780 | 18.031 |
| 5 | 0.0440 | 7.736  | 5.472  | 5.603  | 10.638 | 16.004 |
| 5 | 0.0450 | 8.370  | 6.519  | 5.909  | 4.395  | 23.183 |
| 5 | 0.0460 | 12.872 | 10.074 | 10.031 | 14.995 | 18.681 |
| 5 | 0.0470 | 20.128 | 20.421 | 16.498 | 14.763 | 11.490 |
| 5 | 0.0480 | 12.321 | 13.027 | 9.425  | 9.770  | 10.142 |
| 5 | 0.0490 | 10.942 | 17.049 | 14.806 | 20.819 | 9.688  |
| 5 | 0.0500 | 13.451 | 8.694  | 10.380 | 16.261 | 17.427 |
| 5 | 0.0510 | 15.242 | 6.225  | 10.232 | 14.701 | 20.645 |
| 5 | 0.0520 | 12.697 | 14.261 | 12.682 | 10.465 | 10.956 |
| 5 | 0.0530 | 16.589 | 11.436 | 11.884 | 18.786 | 24.992 |
| 5 | 0.0540 | 16.713 | 11.568 | 11.928 | 18.748 | 24.937 |
| 5 | 0.0550 | 18.777 | 9.559  | 15.635 | 13.772 | 15.069 |
| 5 | 0.0560 | 14.224 | 7.779  | 10.332 | 30.136 | 31.621 |
| 5 | 0.0570 | 18.499 | 12.140 | 13.953 | 25.568 | 27.814 |
| 5 | 0.0580 | 22.056 | 17.992 | 15.592 | 17.111 | 18.543 |
| 5 | 0.0590 | 17.958 | 11.037 | 17.563 | 19.292 | 14.814 |
| 5 | 0.0600 | 17.963 | 11.041 | 17.552 | 19.271 | 14.875 |
| 5 | 0.0610 | 18.097 | 6.639  | 14.340 | 12.643 | 29.974 |
| 5 | 0.0620 | 25.400 | 18.747 | 19.616 | 13.763 | 19.334 |
| 5 | 0.0630 | 16.336 | 13.061 | 14.175 | 12.383 | 19.225 |
| 5 | 0.0640 | 15.875 | 9.241  | 16.388 | 11.911 | 23.426 |
| 5 | 0.0650 | 20.241 | 14.815 | 14.006 | 27.692 | 19.800 |



|   |        |        |        |        |        |        |
|---|--------|--------|--------|--------|--------|--------|
| 5 | 0.0660 | 21.906 | 11.820 | 13.139 | 9.325  | 25.343 |
| 5 | 0.0670 | 18.767 | 14.244 | 14.351 | 15.776 | 20.480 |
| 5 | 0.0680 | 28.664 | 21.578 | 23.150 | 10.951 | 25.330 |
| 5 | 0.0690 | 21.120 | 11.602 | 9.259  | 13.005 | 20.677 |
| 5 | 0.0700 | 17.896 | 4.370  | 8.264  | 22.517 | 20.613 |
| 5 | 0.0710 | 18.457 | 8.834  | 11.142 | 16.129 | 21.693 |
| 5 | 0.0720 | 12.844 | 11.072 | 14.762 | 19.447 | 18.774 |
| 5 | 0.0730 | 20.608 | 9.211  | 13.313 | 10.945 | 14.067 |
| 5 | 0.0740 | 23.440 | 8.713  | 12.626 | 14.718 | 8.564  |
| 5 | 0.0750 | 13.757 | 9.126  | 12.767 | 13.452 | 7.543  |
| 5 | 0.0760 | 15.757 | 13.852 | 16.572 | 18.716 | 8.591  |
| 5 | 0.0770 | 15.055 | 11.518 | 11.974 | 25.250 | 20.216 |
| 5 | 0.0780 | 22.861 | 15.917 | 26.055 | 21.345 | 14.068 |
| 5 | 0.0790 | 23.272 | 17.865 | 22.644 | 14.674 | 9.733  |
| 5 | 0.0800 | 23.724 | 12.240 | 20.665 | 19.784 | 25.229 |
| 5 | 0.0810 | 14.450 | 15.603 | 14.100 | 25.579 | 10.545 |
| 5 | 0.0820 | 18.177 | 13.280 | 14.503 | 25.472 | 16.830 |
| 5 | 0.0830 | 20.341 | 11.802 | 10.313 | 9.807  | 11.821 |
| 5 | 0.0840 | 13.045 | 10.818 | 12.097 | 14.731 | 20.740 |
| 5 | 0.0850 | 18.030 | 13.045 | 14.493 | 33.138 | 13.711 |
| 5 | 0.0860 | 16.012 | 10.349 | 13.931 | 28.664 | 22.700 |
| 5 | 0.0870 | 11.334 | 6.396  | 10.328 | 22.045 | 10.985 |
| 5 | 0.0880 | 17.699 | 6.610  | 16.236 | 16.887 | 13.547 |
| 5 | 0.0890 | 17.959 | 6.777  | 15.090 | 13.277 | 10.557 |
| 5 | 0.0900 | 10.029 | 5.056  | 8.227  | 18.186 | 8.987  |
| 5 | 0.0910 | 24.066 | 10.355 | 12.682 | 19.983 | 13.568 |
| 5 | 0.0920 | 17.792 | 8.043  | 7.788  | 36.161 | 13.697 |
| 5 | 0.0930 | 11.578 | 7.498  | 12.763 | 19.720 | 12.283 |
| 5 | 0.0940 | 16.619 | 13.294 | 15.754 | 15.255 | 18.636 |
| 5 | 0.0950 | 14.810 | 13.129 | 18.448 | 6.304  | 13.393 |
| 5 | 0.0960 | 18.287 | 17.927 | 18.120 | 20.857 | 15.179 |
| 5 | 0.0970 | 14.602 | 17.519 | 22.261 | 13.825 | 15.326 |
| 5 | 0.0980 | 11.045 | 14.278 | 20.538 | 6.430  | 6.912  |
| 5 | 0.0990 | 10.385 | 13.504 | 11.219 | 15.442 | 15.935 |
| 5 | 0.1000 | 10.774 | 16.413 | 10.999 | 20.362 | 12.913 |
| 5 | 0.1010 | 7.440  | 9.886  | 8.595  | 11.899 | 11.661 |
| 5 | 0.1020 | 11.438 | 2.992  | 3.888  | 10.809 | 15.738 |
| 5 | 0.1030 | 20.738 | 25.210 | 25.072 | 23.195 | 22.852 |
| 5 | 0.1040 | 9.604  | 13.794 | 8.996  | 27.338 | 17.508 |
| 5 | 0.1050 | 9.558  | 16.094 | 11.883 | 17.017 | 8.067  |
| 5 | 0.1060 | 13.710 | 10.723 | 14.367 | 7.213  | 13.702 |
| 5 | 0.1070 | 18.121 | 17.477 | 21.495 | 12.055 | 11.522 |
| 5 | 0.1080 | 7.541  | 4.289  | 4.003  | 10.222 | 9.908  |
| 5 | 0.1090 | 18.130 | 16.644 | 18.602 | 15.157 | 10.800 |
| 5 | 0.1100 | 17.202 | 15.680 | 17.109 | 29.148 | 20.789 |
| 5 | 0.1110 | 13.059 | 11.097 | 16.312 | 17.444 | 18.271 |
| 5 | 0.1120 | 13.224 | 12.538 | 14.667 | 25.211 | 13.898 |
| 5 | 0.1130 | 17.237 | 15.216 | 22.543 | 15.899 | 11.211 |
| 5 | 0.1140 | 10.969 | 8.249  | 13.289 | 8.649  | 7.899  |
| 5 | 0.1150 | 19.008 | 16.732 | 21.959 | 17.823 | 17.100 |

|   |        |        |        |        |        |        |
|---|--------|--------|--------|--------|--------|--------|
| 5 | 0.1160 | 16.342 | 14.951 | 19.382 | 19.823 | 14.918 |
| 5 | 0.1170 | 13.259 | 13.261 | 20.210 | 9.967  | 13.782 |
| 5 | 0.1180 | 18.741 | 13.687 | 22.017 | 15.893 | 17.565 |
| 5 | 0.1190 | 13.158 | 8.879  | 11.583 | 19.939 | 18.063 |
| 5 | 0.1200 | 15.160 | 12.575 | 18.800 | 14.972 | 8.408  |
| 5 | 0.1210 | 10.974 | 14.601 | 20.522 | 9.729  | 19.537 |
| 5 | 0.1220 | 9.261  | 20.139 | 19.548 | 18.292 | 15.856 |
| 5 | 0.1230 | 14.281 | 16.591 | 16.334 | 19.018 | 12.378 |
| 5 | 0.1240 | 17.234 | 15.337 | 17.480 | 17.354 | 17.050 |
| 5 | 0.1250 | 13.443 | 16.128 | 14.317 | 18.454 | 18.463 |
| 5 | 0.1260 | 7.941  | 15.673 | 12.638 | 19.212 | 9.895  |
| 5 | 0.1270 | 22.094 | 16.535 | 28.610 | 11.617 | 11.116 |
| 5 | 0.1280 | 19.996 | 19.932 | 29.655 | 15.061 | 12.732 |
| 5 | 0.1290 | 17.654 | 14.869 | 18.378 | 10.487 | 8.176  |
| 5 | 0.1300 | 24.485 | 20.152 | 23.666 | 12.113 | 6.952  |
| 5 | 0.1310 | 18.643 | 7.787  | 13.560 | 14.571 | 10.652 |
| 5 | 0.1320 | 18.203 | 9.412  | 13.145 | 17.236 | 10.300 |
| 5 | 0.1330 | 21.467 | 8.668  | 14.710 | 14.669 | 9.182  |
| 5 | 0.1340 | 12.087 | 13.345 | 16.340 | 21.827 | 10.531 |
| 5 | 0.1350 | 7.174  | 13.040 | 9.317  | 23.955 | 11.711 |
| 5 | 0.1360 | 7.146  | 13.005 | 9.340  | 23.857 | 11.733 |
| 5 | 0.1370 | 13.231 | 9.627  | 11.298 | 16.136 | 10.441 |
| 5 | 0.1380 | 14.456 | 9.574  | 11.575 | 14.049 | 9.589  |
| 5 | 0.1390 | 10.881 | 10.651 | 10.541 | 26.424 | 13.709 |
| 5 | 0.1400 | 11.433 | 15.633 | 13.271 | 38.142 | 15.460 |
| 5 | 0.1410 | 12.472 | 12.108 | 15.674 | 13.921 | 12.263 |
| 5 | 0.1420 | 11.257 | 18.340 | 20.216 | 23.332 | 17.267 |
| 5 | 0.1430 | 7.390  | 9.310  | 6.992  | 21.995 | 7.603  |
| 5 | 0.1440 | 12.496 | 10.291 | 15.671 | 10.905 | 21.788 |
| 5 | 0.1450 | 5.389  | 9.115  | 11.995 | 14.342 | 15.686 |
| 5 | 0.1460 | 18.993 | 13.438 | 17.172 | 10.360 | 20.756 |
| 5 | 0.1470 | 12.180 | 11.619 | 13.177 | 14.389 | 9.412  |
| 5 | 0.1480 | 11.439 | 14.365 | 15.252 | 18.062 | 8.600  |
| 5 | 0.1490 | 10.801 | 10.565 | 10.401 | 12.729 | 9.237  |
| 5 | 0.1500 | 2.507  | 7.661  | 7.286  | 19.491 | 21.481 |
| 5 | 0.1510 | 6.871  | 9.648  | 7.412  | 15.937 | 10.818 |
| 5 | 0.1520 | 8.297  | 12.503 | 10.134 | 19.135 | 15.349 |
| 5 | 0.1530 | 16.982 | 21.995 | 21.172 | 17.584 | 24.212 |
| 5 | 0.1540 | 14.932 | 16.745 | 15.718 | 20.067 | 19.231 |
| 5 | 0.1550 | 8.258  | 14.353 | 11.805 | 10.344 | 24.679 |
| 5 | 0.1560 | 3.233  | 11.618 | 9.696  | 10.488 | 13.490 |
| 5 | 0.1570 | 9.869  | 7.629  | 9.284  | 14.807 | 14.486 |
| 5 | 0.1580 | 7.639  | 5.952  | 8.223  | 9.889  | 10.315 |
| 5 | 0.1590 | 7.667  | 5.977  | 8.177  | 9.876  | 10.375 |
| 5 | 0.1600 | 12.512 | 10.961 | 12.803 | 26.757 | 18.885 |
| 5 | 0.1610 | 7.823  | 8.288  | 8.106  | 14.222 | 16.174 |
| 5 | 0.1620 | 11.533 | 9.681  | 10.372 | 24.256 | 16.926 |
| 5 | 0.1630 | 13.563 | 8.671  | 13.512 | 28.643 | 23.586 |
| 5 | 0.1640 | 16.099 | 14.784 | 19.900 | 10.694 | 19.079 |
| 5 | 0.1650 | 8.750  | 10.495 | 9.746  | 14.136 | 18.994 |

|   |        |        |        |        |        |        |
|---|--------|--------|--------|--------|--------|--------|
| 5 | 0.1660 | 23.421 | 20.341 | 24.192 | 20.891 | 15.331 |
| 5 | 0.1670 | 12.547 | 15.366 | 14.699 | 18.619 | 12.464 |
| 5 | 0.1680 | 15.306 | 13.890 | 15.814 | 17.434 | 11.948 |
| 5 | 0.1690 | 11.550 | 19.034 | 13.827 | 26.564 | 19.578 |
| 5 | 0.1700 | 12.992 | 10.685 | 13.458 | 26.445 | 19.596 |
| 5 | 0.1710 | 9.760  | 18.510 | 13.812 | 21.013 | 17.676 |
| 5 | 0.1720 | 7.589  | 17.587 | 11.164 | 15.119 | 4.638  |
| 5 | 0.1730 | 13.289 | 20.004 | 18.622 | 8.692  | 8.335  |
| 5 | 0.1740 | 15.082 | 23.165 | 18.576 | 23.168 | 15.688 |
| 5 | 0.1750 | 17.676 | 10.224 | 12.701 | 20.187 | 20.010 |
| 5 | 0.1760 | 17.335 | 17.310 | 19.974 | 23.642 | 24.214 |
| 5 | 0.1770 | 14.685 | 14.995 | 15.061 | 17.112 | 16.440 |
| 5 | 0.1780 | 9.001  | 4.625  | 8.078  | 15.211 | 15.117 |
| 5 | 0.1790 | 8.063  | 12.038 | 14.814 | 19.599 | 26.699 |
| 5 | 0.1800 | 11.263 | 9.408  | 13.677 | 8.381  | 16.514 |
| 5 | 0.1810 | 15.403 | 12.911 | 12.300 | 18.257 | 19.967 |
| 5 | 0.1820 | 9.958  | 10.124 | 9.677  | 15.095 | 9.000  |
| 5 | 0.1830 | 9.944  | 10.124 | 9.676  | 15.074 | 9.000  |
| 5 | 0.1840 | 18.375 | 11.328 | 16.772 | 10.367 | 22.941 |
| 5 | 0.1850 | 11.239 | 6.639  | 14.575 | 13.485 | 7.211  |
| 5 | 0.1860 | 11.062 | 6.512  | 13.834 | 17.917 | 9.400  |
| 5 | 0.1870 | 8.657  | 12.978 | 17.420 | 16.939 | 17.389 |
| 5 | 0.1880 | 13.535 | 18.878 | 18.551 | 15.355 | 18.614 |
| 5 | 0.1890 | 4.367  | 9.666  | 12.385 | 15.180 | 25.569 |
| 5 | 0.1900 | 13.757 | 19.708 | 20.237 | 10.209 | 17.747 |
| 5 | 0.1910 | 15.135 | 11.115 | 15.694 | 12.743 | 20.423 |
| 5 | 0.1920 | 11.725 | 11.313 | 14.889 | 10.758 | 31.191 |
| 5 | 0.1930 | 9.091  | 10.606 | 10.101 | 9.652  | 25.147 |
| 5 | 0.1940 | 9.036  | 10.539 | 10.020 | 9.645  | 25.169 |
| 5 | 0.1950 | 10.021 | 10.584 | 12.583 | 12.913 | 19.102 |
| 5 | 0.1960 | 9.388  | 11.733 | 14.024 | 12.934 | 20.131 |
| 5 | 0.1970 | 16.085 | 9.775  | 11.168 | 15.273 | 23.084 |
| 5 | 0.1980 | 23.052 | 20.552 | 17.504 | 17.938 | 34.597 |
| 5 | 0.1990 | 25.522 | 21.902 | 16.559 | 14.925 | 29.765 |
| 5 | 0.2000 | 11.073 | 13.290 | 14.973 | 10.333 | 14.277 |
| 5 | 0.2010 | 15.752 | 19.035 | 19.466 | 19.386 | 25.585 |
| 5 | 0.2020 | 9.078  | 13.027 | 13.086 | 13.781 | 16.575 |
| 5 | 0.2030 | 10.221 | 13.183 | 10.852 | 16.421 | 31.749 |
| 5 | 0.2040 | 10.098 | 13.230 | 10.828 | 16.451 | 31.774 |
| 5 | 0.2050 | 10.016 | 13.040 | 10.890 | 19.282 | 24.152 |
| 5 | 0.2060 | 18.285 | 18.180 | 18.540 | 13.195 | 24.892 |
| 5 | 0.2070 | 4.105  | 5.810  | 6.156  | 13.076 | 22.538 |
| 5 | 0.2080 | 4.326  | 7.253  | 9.130  | 13.672 | 17.943 |
| 5 | 0.2090 | 5.516  | 6.461  | 9.139  | 9.863  | 15.704 |
| 5 | 0.2100 | 15.225 | 13.145 | 13.996 | 18.096 | 25.128 |
| 5 | 0.2110 | 9.473  | 10.242 | 10.942 | 14.365 | 27.439 |
| 5 | 0.2120 | 13.915 | 6.970  | 10.451 | 14.193 | 31.333 |
| 5 | 0.2130 | 5.438  | 10.300 | 9.930  | 19.203 | 25.846 |
| 5 | 0.2140 | 2.993  | 5.434  | 6.889  | 25.296 | 37.105 |
| 5 | 0.2150 | 8.580  | 13.723 | 17.287 | 26.227 | 37.161 |

|   |        |        |        |        |        |        |
|---|--------|--------|--------|--------|--------|--------|
| 5 | 0.2160 | 24.678 | 19.679 | 21.078 | 23.136 | 39.468 |
| 5 | 0.2170 | 6.908  | 9.288  | 12.646 | 28.602 | 42.011 |
| 5 | 0.2180 | 17.074 | 15.982 | 14.649 | 19.770 | 35.431 |
| 5 | 0.2190 | 21.370 | 20.084 | 15.694 | 17.284 | 26.822 |
| 5 | 0.2200 | 13.725 | 10.732 | 13.085 | 21.554 | 16.461 |
| 5 | 0.2210 | 12.320 | 10.421 | 17.981 | 16.070 | 28.607 |
| 5 | 0.2220 | 19.381 | 16.467 | 20.386 | 24.944 | 30.889 |
| 5 | 0.2230 | 18.919 | 15.401 | 20.469 | 14.311 | 25.590 |
| 5 | 0.2240 | 13.995 | 8.611  | 8.529  | 29.376 | 40.644 |
| 5 | 0.2250 | 6.230  | 8.689  | 9.697  | 22.581 | 26.471 |
| 5 | 0.2260 | 12.271 | 9.844  | 8.217  | 34.585 | 37.274 |
| 5 | 0.2270 | 23.522 | 15.424 | 11.045 | 25.879 | 33.995 |
| 5 | 0.2280 | 17.841 | 23.564 | 23.211 | 23.348 | 24.265 |
| 5 | 0.2290 | 8.470  | 9.766  | 13.222 | 5.100  | 16.586 |
| 5 | 0.2300 | 12.228 | 16.424 | 17.890 | 18.268 | 27.844 |
| 5 | 0.2310 | 14.346 | 16.576 | 20.594 | 24.347 | 41.367 |
| 5 | 0.2320 | 7.382  | 15.543 | 15.671 | 27.466 | 22.546 |
| 5 | 0.2330 | 10.676 | 16.069 | 12.095 | 31.682 | 27.561 |
| 5 | 0.2340 | 12.597 | 12.167 | 11.602 | 22.874 | 23.079 |
| 5 | 0.2350 | 16.944 | 18.594 | 18.862 | 26.521 | 23.293 |
| 5 | 0.2360 | 10.509 | 12.446 | 10.533 | 24.202 | 25.826 |
| 5 | 0.2370 | 9.356  | 15.609 | 8.232  | 23.129 | 36.390 |
| 5 | 0.2380 | 15.901 | 15.021 | 13.445 | 21.759 | 25.818 |
| 5 | 0.2390 | 17.244 | 20.910 | 15.643 | 21.340 | 25.151 |
| 5 | 0.2400 | 7.584  | 16.343 | 7.557  | 22.714 | 17.737 |
| 5 | 0.2410 | 5.526  | 18.088 | 8.914  | 23.360 | 27.941 |
| 5 | 0.2420 | 6.926  | 11.096 | 7.300  | 22.668 | 28.956 |
| 5 | 0.2430 | 10.268 | 13.127 | 13.813 | 22.297 | 33.856 |
| 5 | 0.2440 | 13.301 | 18.564 | 17.591 | 25.487 | 30.194 |
| 5 | 0.2450 | 10.510 | 16.595 | 14.996 | 32.918 | 29.721 |
| 5 | 0.2460 | 10.653 | 16.745 | 15.248 | 32.589 | 29.735 |
| 5 | 0.2470 | 10.449 | 12.221 | 8.640  | 28.121 | 33.089 |
| 5 | 0.2480 | 12.461 | 10.962 | 6.755  | 22.426 | 46.916 |
| 5 | 0.2490 | 12.288 | 12.598 | 8.324  | 10.802 | 25.023 |
| 5 | 0.2500 | 5.900  | 5.399  | 8.606  | 13.456 | 34.252 |
| 5 | 0.2510 | 6.478  | 7.824  | 11.326 | 27.686 | 28.784 |
| 5 | 0.2520 | 8.571  | 10.224 | 7.091  | 27.566 | 26.335 |
| 5 | 0.2530 | 7.187  | 8.064  | 6.054  | 22.570 | 31.697 |
| 5 | 0.2540 | 19.629 | 17.595 | 14.699 | 22.476 | 41.664 |
| 5 | 0.2550 | 9.586  | 13.530 | 14.009 | 16.664 | 34.910 |
| 5 | 0.2560 | 10.448 | 10.435 | 12.462 | 20.027 | 31.726 |
| 5 | 0.2570 | 11.106 | 13.220 | 17.058 | 11.334 | 19.950 |
| 5 | 0.2580 | 14.199 | 15.231 | 21.438 | 15.833 | 9.453  |
| 5 | 0.2590 | 5.310  | 8.893  | 10.534 | 15.338 | 19.239 |
| 5 | 0.2600 | 5.312  | 8.878  | 10.536 | 15.358 | 19.266 |
| 5 | 0.2610 | 11.420 | 22.281 | 18.212 | 33.361 | 37.022 |
| 5 | 0.2620 | 4.266  | 16.491 | 8.450  | 30.125 | 30.312 |
| 5 | 0.2630 | 9.073  | 14.719 | 15.065 | 27.452 | 26.343 |
| 5 | 0.2640 | 13.062 | 22.717 | 21.086 | 37.814 | 31.702 |
| 5 | 0.2650 | 8.107  | 14.568 | 7.451  | 15.007 | 23.009 |

|   |        |        |        |        |        |        |
|---|--------|--------|--------|--------|--------|--------|
| 5 | 0.2660 | 10.544 | 13.470 | 12.659 | 15.109 | 11.787 |
| 5 | 0.2670 | 5.332  | 10.149 | 8.876  | 26.789 | 28.922 |
| 5 | 0.2680 | 6.520  | 8.332  | 6.771  | 17.653 | 25.831 |
| 5 | 0.2690 | 12.442 | 22.892 | 13.544 | 24.740 | 20.189 |
| 5 | 0.2700 | 7.189  | 8.337  | 6.752  | 25.217 | 22.063 |
| 5 | 0.2710 | 5.801  | 12.519 | 6.315  | 15.072 | 11.703 |
| 5 | 0.2720 | 18.107 | 23.420 | 20.977 | 19.273 | 21.318 |
| 5 | 0.2730 | 16.884 | 17.523 | 14.392 | 19.243 | 23.201 |
| 5 | 0.2740 | 13.685 | 11.221 | 9.492  | 11.581 | 15.254 |
| 5 | 0.2750 | 4.045  | 8.425  | 7.712  | 6.640  | 15.720 |
| 5 | 0.2760 | 8.273  | 10.554 | 6.215  | 26.308 | 21.170 |
| 5 | 0.2770 | 8.504  | 14.367 | 13.177 | 29.591 | 14.889 |
| 5 | 0.2780 | 8.276  | 19.664 | 13.777 | 24.664 | 22.734 |
| 5 | 0.2790 | 4.124  | 20.796 | 10.079 | 32.889 | 24.521 |
| 5 | 0.2800 | 4.765  | 8.864  | 6.771  | 20.432 | 28.993 |
| 5 | 0.2810 | 5.996  | 9.170  | 8.731  | 9.019  | 10.916 |
| 5 | 0.2820 | 9.725  | 14.735 | 11.773 | 22.596 | 13.590 |
| 5 | 0.2830 | 10.049 | 16.120 | 19.034 | 19.681 | 14.354 |
| 5 | 0.2840 | 7.780  | 11.559 | 12.340 | 9.232  | 11.071 |
| 5 | 0.2850 | 6.143  | 15.006 | 9.992  | 22.265 | 13.201 |
| 5 | 0.2860 | 13.323 | 20.790 | 16.010 | 13.383 | 13.815 |
| 5 | 0.2870 | 10.796 | 17.371 | 12.091 | 19.736 | 17.161 |
| 5 | 0.2880 | 10.801 | 17.368 | 12.085 | 19.743 | 17.162 |
| 5 | 0.2890 | 15.075 | 18.330 | 13.058 | 16.963 | 4.563  |
| 5 | 0.2900 | 7.987  | 16.270 | 10.040 | 22.864 | 12.692 |
| 5 | 0.2910 | 11.332 | 8.815  | 9.957  | 14.854 | 13.136 |
| 5 | 0.2920 | 9.544  | 13.270 | 9.288  | 11.958 | 12.515 |
| 5 | 0.2930 | 19.265 | 16.509 | 15.317 | 8.277  | 11.083 |
| 5 | 0.2940 | 8.262  | 12.955 | 10.435 | 30.722 | 25.960 |
| 5 | 0.2950 | 11.450 | 21.740 | 16.532 | 26.309 | 25.377 |
| 5 | 0.2960 | 6.847  | 18.555 | 11.608 | 30.972 | 22.047 |
| 5 | 0.2970 | 9.730  | 20.300 | 13.569 | 27.210 | 21.465 |
| 5 | 0.2980 | 4.648  | 9.193  | 5.338  | 23.028 | 22.322 |
| 5 | 0.2990 | 8.928  | 14.364 | 10.214 | 13.008 | 13.603 |
| 5 | 0.3000 | 6.374  | 16.321 | 7.037  | 23.514 | 16.544 |
| 5 | 0.3010 | 9.041  | 21.822 | 16.737 | 20.778 | 21.586 |
| 5 | 0.3020 | 10.909 | 24.911 | 21.044 | 15.204 | 11.111 |
| 5 | 0.3030 | 12.850 | 18.399 | 17.563 | 17.071 | 17.781 |
| 5 | 0.3040 | 13.446 | 13.433 | 15.103 | 16.858 | 13.538 |
| 5 | 0.3050 | 15.309 | 21.881 | 17.367 | 28.676 | 28.213 |
| 5 | 0.3060 | 15.887 | 25.201 | 19.396 | 30.949 | 27.554 |
| 5 | 0.3070 | 3.684  | 17.751 | 12.750 | 23.819 | 21.827 |
| 5 | 0.3080 | 8.403  | 19.077 | 18.101 | 22.714 | 20.446 |
| 5 | 0.3090 | 5.817  | 4.076  | 5.499  | 13.663 | 18.493 |
| 5 | 0.3100 | 9.148  | 10.889 | 5.557  | 14.892 | 23.334 |
| 5 | 0.3110 | 10.923 | 20.153 | 19.464 | 15.236 | 22.961 |
| 5 | 0.3120 | 12.127 | 22.690 | 16.902 | 22.597 | 34.154 |
| 5 | 0.3130 | 11.259 | 22.081 | 16.453 | 27.424 | 38.324 |
| 5 | 0.3140 | 10.330 | 17.906 | 11.394 | 29.694 | 29.986 |
| 5 | 0.3150 | 10.327 | 17.859 | 11.370 | 29.586 | 29.991 |

|   |        |        |        |        |        |        |
|---|--------|--------|--------|--------|--------|--------|
| 5 | 0.3160 | 5.245  | 14.279 | 14.351 | 29.722 | 45.530 |
| 5 | 0.3170 | 17.855 | 20.407 | 19.952 | 33.034 | 59.097 |
| 5 | 0.3180 | 17.604 | 13.517 | 16.270 | 16.394 | 36.540 |
| 5 | 0.3190 | 15.858 | 18.567 | 17.592 | 37.659 | 25.690 |
| 5 | 0.3200 | 15.870 | 18.574 | 17.598 | 37.672 | 25.683 |
| 5 | 0.3210 | 17.425 | 13.911 | 15.277 | 18.491 | 32.941 |
| 5 | 0.3220 | 12.740 | 15.284 | 13.865 | 17.353 | 40.629 |
| 5 | 0.3230 | 11.424 | 10.298 | 10.344 | 20.888 | 37.365 |
| 5 | 0.3240 | 11.712 | 17.806 | 11.827 | 18.546 | 19.736 |
| 5 | 0.3250 | 15.435 | 18.037 | 17.680 | 28.120 | 24.373 |
| 5 | 0.3260 | 11.980 | 21.558 | 14.833 | 18.851 | 32.484 |
| 5 | 0.3270 | 10.729 | 17.352 | 15.671 | 19.832 | 22.883 |
| 5 | 0.3280 | 9.974  | 10.371 | 12.521 | 19.065 | 33.835 |
| 5 | 0.3290 | 7.096  | 11.005 | 9.998  | 22.523 | 26.129 |
| 5 | 0.3300 | 1.093  | 10.591 | 9.559  | 16.123 | 10.738 |
| 5 | 0.3310 | 4.464  | 12.696 | 8.877  | 16.846 | 10.147 |
| 5 | 0.3320 | 10.303 | 13.686 | 9.782  | 17.291 | 16.209 |
| 5 | 0.3330 | 17.086 | 13.702 | 7.107  | 22.846 | 18.053 |
| 5 | 0.3340 | 20.995 | 16.201 | 12.454 | 14.413 | 14.698 |
| 5 | 0.3350 | 14.533 | 14.021 | 12.922 | 9.334  | 15.445 |
| 5 | 0.3360 | 8.401  | 15.183 | 14.276 | 20.661 | 14.752 |
| 5 | 0.3370 | 20.056 | 18.790 | 13.753 | 23.025 | 25.399 |
| 5 | 0.3380 | 8.014  | 13.327 | 10.547 | 32.620 | 22.786 |
| 5 | 0.3390 | 18.067 | 27.455 | 16.433 | 30.729 | 21.114 |
| 5 | 0.3400 | 19.079 | 20.559 | 17.923 | 34.090 | 28.028 |
| 5 | 0.3410 | 15.960 | 16.119 | 16.725 | 19.413 | 13.178 |
| 5 | 0.3420 | 17.688 | 18.663 | 20.227 | 17.643 | 11.455 |
| 5 | 0.3430 | 13.620 | 18.356 | 19.166 | 20.444 | 9.920  |
| 5 | 0.3440 | 5.791  | 14.098 | 14.326 | 13.844 | 8.679  |
| 5 | 0.3450 | 6.077  | 9.457  | 12.138 | 2.205  | 4.353  |
| 5 | 0.3460 | 13.398 | 15.235 | 11.688 | 17.846 | 23.171 |
| 5 | 0.3470 | 13.797 | 11.244 | 15.630 | 17.973 | 27.874 |
| 5 | 0.3480 | 11.886 | 16.912 | 10.848 | 19.695 | 10.580 |
| 5 | 0.3490 | 8.309  | 5.517  | 4.168  | 24.675 | 18.909 |
| 5 | 0.3500 | 5.691  | 9.914  | 5.522  | 25.522 | 14.173 |
| 5 | 0.3510 | 12.323 | 13.280 | 9.398  | 19.103 | 9.409  |
| 5 | 0.3520 | 5.498  | 12.056 | 7.311  | 25.356 | 8.661  |
| 5 | 0.3530 | 14.222 | 24.190 | 15.267 | 22.190 | 9.474  |
| 5 | 0.3540 | 17.197 | 22.253 | 15.936 | 13.559 | 13.234 |
| 5 | 0.3550 | 14.436 | 11.674 | 8.339  | 19.587 | 15.057 |
| 5 | 0.3560 | 15.755 | 13.147 | 6.402  | 16.870 | 16.851 |
| 5 | 0.3570 | 15.786 | 12.962 | 6.292  | 17.166 | 16.482 |
| 5 | 0.3580 | 10.120 | 15.336 | 9.322  | 16.352 | 13.972 |
| 5 | 0.3590 | 6.662  | 10.198 | 6.478  | 15.454 | 9.554  |
| 5 | 0.3600 | 12.108 | 10.948 | 7.217  | 14.345 | 13.953 |
| 5 | 0.3610 | 7.588  | 9.697  | 8.331  | 10.750 | 11.564 |
| 5 | 0.3620 | 5.569  | 6.401  | 3.938  | 11.845 | 10.423 |
| 5 | 0.3630 | 12.693 | 10.497 | 6.704  | 19.116 | 13.524 |
| 5 | 0.3640 | 7.641  | 5.425  | 8.127  | 12.482 | 4.872  |
| 5 | 0.3650 | 7.249  | 8.365  | 8.848  | 16.089 | 7.951  |

|   |        |        |        |        |        |        |
|---|--------|--------|--------|--------|--------|--------|
| 5 | 0.3660 | 9.242  | 16.385 | 10.059 | 17.858 | 8.545  |
| 5 | 0.3670 | 12.548 | 14.935 | 9.674  | 19.749 | 17.743 |
| 5 | 0.3680 | 9.674  | 16.048 | 11.972 | 20.889 | 18.726 |
| 5 | 0.3690 | 10.238 | 10.684 | 11.750 | 16.008 | 11.515 |
| 5 | 0.3700 | 11.819 | 16.521 | 16.724 | 15.013 | 7.186  |
| 5 | 0.3710 | 6.177  | 5.140  | 10.799 | 7.365  | 5.455  |
| 5 | 0.3720 | 3.160  | 9.990  | 8.507  | 26.243 | 14.558 |
| 5 | 0.3730 | 13.734 | 22.807 | 16.557 | 25.925 | 15.861 |
| 5 | 0.3740 | 10.672 | 10.052 | 10.184 | 14.464 | 17.007 |
| 5 | 0.3750 | 11.267 | 15.901 | 10.916 | 17.061 | 21.371 |
| 5 | 0.3760 | 11.731 | 10.113 | 7.722  | 6.232  | 7.575  |
| 5 | 0.3770 | 10.184 | 22.815 | 15.630 | 22.108 | 26.799 |
| 5 | 0.3780 | 11.954 | 15.762 | 14.179 | 20.736 | 25.248 |
| 5 | 0.3790 | 13.298 | 13.110 | 10.598 | 12.754 | 15.789 |
| 5 | 0.3800 | 13.179 | 10.273 | 12.030 | 11.424 | 19.232 |
| 5 | 0.3810 | 17.187 | 14.552 | 11.175 | 19.069 | 11.547 |
| 5 | 0.3820 | 14.467 | 21.364 | 23.660 | 15.242 | 19.844 |
| 5 | 0.3830 | 17.912 | 15.351 | 19.120 | 20.538 | 25.873 |
| 5 | 0.3840 | 14.480 | 14.328 | 11.024 | 26.857 | 34.081 |
| 5 | 0.3850 | 12.428 | 15.898 | 13.877 | 20.047 | 14.790 |
| 5 | 0.3860 | 16.056 | 20.565 | 19.193 | 19.906 | 8.611  |
| 5 | 0.3870 | 14.870 | 19.790 | 23.015 | 21.365 | 12.771 |
| 5 | 0.3880 | 14.801 | 19.689 | 22.934 | 21.524 | 12.663 |
| 5 | 0.3890 | 17.372 | 12.808 | 10.105 | 15.244 | 15.417 |
| 5 | 0.3900 | 16.239 | 13.255 | 13.193 | 10.314 | 11.104 |
| 5 | 0.3910 | 7.242  | 9.393  | 7.125  | 12.944 | 10.831 |
| 5 | 0.3920 | 7.256  | 9.394  | 7.107  | 12.805 | 10.900 |
| 5 | 0.3930 | 7.273  | 9.396  | 7.103  | 12.664 | 10.969 |
| 5 | 0.3940 | 10.061 | 12.530 | 11.882 | 10.101 | 8.706  |
| 5 | 0.3950 | 11.153 | 17.382 | 17.837 | 15.308 | 11.420 |
| 5 | 0.3960 | 12.523 | 10.386 | 17.207 | 12.473 | 10.969 |
| 5 | 0.3970 | 17.702 | 14.614 | 24.326 | 11.437 | 11.812 |
| 5 | 0.3980 | 17.841 | 14.725 | 24.575 | 11.272 | 11.842 |
| 5 | 0.3990 | 17.985 | 14.832 | 24.816 | 11.128 | 11.861 |
| 5 | 0.4000 | 18.133 | 14.935 | 25.042 | 11.013 | 11.861 |
| 5 | 0.4010 | 18.492 | 17.723 | 12.506 | 20.645 | 13.140 |
| 5 | 0.4020 | 18.517 | 17.691 | 12.478 | 20.643 | 13.139 |
| 5 | 0.4030 | 18.543 | 17.658 | 12.452 | 20.639 | 13.137 |
| 5 | 0.4040 | 12.457 | 12.218 | 7.238  | 16.783 | 16.345 |
| 5 | 0.4050 | 12.470 | 12.118 | 7.129  | 16.793 | 16.354 |
| 5 | 0.4060 | 12.482 | 12.016 | 7.026  | 16.796 | 16.369 |
| 5 | 0.4070 | 16.511 | 12.462 | 12.630 | 11.065 | 16.284 |
| 5 | 0.4080 | 12.275 | 13.356 | 19.116 | 10.317 | 21.295 |
| 5 | 0.4090 | 17.767 | 17.132 | 20.158 | 18.812 | 21.613 |
| 5 | 0.4100 | 17.833 | 17.147 | 20.260 | 18.810 | 21.541 |
| 5 | 0.4110 | 14.464 | 12.124 | 13.847 | 11.893 | 14.987 |
| 5 | 0.4120 | 27.965 | 20.175 | 23.300 | 15.332 | 7.780  |
| 5 | 0.4130 | 13.561 | 13.173 | 8.477  | 13.283 | 12.695 |
| 5 | 0.4140 | 7.784  | 9.345  | 7.160  | 7.182  | 11.674 |
| 5 | 0.4150 | 13.616 | 10.551 | 15.732 | 8.926  | 15.410 |

|   |        |        |        |        |        |        |
|---|--------|--------|--------|--------|--------|--------|
| 5 | 0.4160 | 19.725 | 11.461 | 20.472 | 12.044 | 18.433 |
| 5 | 0.4170 | 10.705 | 10.288 | 10.041 | 15.304 | 10.020 |
| 5 | 0.4180 | 21.430 | 24.809 | 21.042 | 18.916 | 14.877 |
| 5 | 0.4190 | 7.478  | 12.745 | 5.516  | 14.207 | 10.573 |
| 5 | 0.4200 | 4.355  | 3.923  | 3.740  | 11.350 | 5.941  |
| 5 | 0.4210 | 9.457  | 15.319 | 11.230 | 18.578 | 10.605 |
| 5 | 0.4220 | 10.697 | 8.020  | 8.042  | 18.056 | 10.253 |
| 5 | 0.4230 | 2.179  | 7.716  | 2.552  | 11.784 | 2.220  |
| 5 | 0.4240 | 5.907  | 8.516  | 1.453  | 23.167 | 19.536 |
| 5 | 0.4250 | 4.627  | 5.307  | 2.968  | 11.204 | 9.891  |
| 5 | 0.4260 | 9.132  | 11.714 | 7.742  | 4.120  | 14.111 |
| 5 | 0.4270 | 11.316 | 16.038 | 11.445 | 15.655 | 19.840 |
| 5 | 0.4280 | 10.828 | 13.322 | 11.879 | 17.506 | 9.544  |
| 5 | 0.4290 | 4.758  | 12.656 | 9.782  | 17.418 | 15.088 |
| 5 | 0.4300 | 8.959  | 17.867 | 13.425 | 14.455 | 10.397 |
| 5 | 0.4310 | 14.553 | 22.524 | 12.099 | 19.702 | 8.064  |
| 5 | 0.4320 | 13.709 | 12.732 | 15.810 | 12.555 | 9.950  |
| 5 | 0.4330 | 10.102 | 17.816 | 9.809  | 25.697 | 13.693 |
| 5 | 0.4340 | 4.425  | 9.064  | 7.411  | 13.530 | 19.092 |
| 5 | 0.4350 | 12.308 | 12.224 | 13.871 | 7.605  | 16.360 |
| 5 | 0.4360 | 12.914 | 15.850 | 15.138 | 12.878 | 18.230 |
| 5 | 0.4370 | 6.385  | 7.644  | 9.138  | 17.995 | 15.533 |
| 5 | 0.4380 | 7.391  | 12.391 | 10.794 | 22.316 | 13.441 |
| 5 | 0.4390 | 19.685 | 24.270 | 17.936 | 19.621 | 17.068 |
| 5 | 0.4400 | 6.765  | 16.353 | 13.258 | 22.669 | 15.469 |
| 5 | 0.4410 | 14.530 | 16.584 | 19.893 | 13.906 | 16.280 |
| 5 | 0.4420 | 10.134 | 14.489 | 12.094 | 12.772 | 8.487  |
| 5 | 0.4430 | 16.252 | 14.253 | 12.930 | 17.685 | 8.497  |
| 5 | 0.4440 | 7.252  | 13.419 | 11.680 | 18.732 | 19.750 |
| 5 | 0.4450 | 11.875 | 11.276 | 13.269 | 20.833 | 15.129 |
| 5 | 0.4460 | 16.272 | 15.556 | 15.211 | 19.039 | 15.412 |
| 5 | 0.4470 | 6.040  | 8.959  | 4.925  | 20.796 | 15.669 |
| 5 | 0.4480 | 8.238  | 10.505 | 9.067  | 15.708 | 9.559  |
| 5 | 0.4490 | 7.885  | 7.671  | 11.600 | 12.444 | 15.725 |
| 5 | 0.4500 | 5.900  | 13.097 | 9.895  | 19.322 | 13.861 |
| 5 | 0.4510 | 16.705 | 19.809 | 18.705 | 15.963 | 13.174 |
| 5 | 0.4520 | 9.071  | 15.009 | 6.179  | 23.811 | 13.904 |
| 5 | 0.4530 | 25.163 | 22.452 | 22.403 | 16.978 | 15.716 |
| 5 | 0.4540 | 23.831 | 22.615 | 17.511 | 14.764 | 19.278 |
| 5 | 0.4550 | 18.307 | 18.642 | 16.489 | 15.571 | 16.393 |
| 5 | 0.4560 | 18.220 | 17.580 | 20.022 | 20.156 | 17.294 |
| 5 | 0.4570 | 13.040 | 11.879 | 12.091 | 19.002 | 14.637 |
| 5 | 0.4580 | 18.908 | 17.498 | 18.756 | 21.869 | 14.675 |
| 5 | 0.4590 | 9.350  | 13.618 | 9.759  | 14.377 | 12.034 |
| 5 | 0.4600 | 9.438  | 7.287  | 6.875  | 13.008 | 9.466  |
| 5 | 0.4610 | 10.060 | 4.889  | 8.265  | 12.619 | 11.348 |
| 5 | 0.4620 | 6.359  | 5.567  | 7.479  | 20.010 | 7.585  |
| 5 | 0.4630 | 11.961 | 10.453 | 10.322 | 16.168 | 10.087 |
| 5 | 0.4640 | 6.493  | 5.594  | 8.164  | 15.774 | 10.051 |
| 5 | 0.4650 | 8.954  | 3.493  | 8.838  | 20.239 | 11.945 |



|   |        |        |        |        |        |        |
|---|--------|--------|--------|--------|--------|--------|
| 5 | 0.4660 | 10.244 | 9.937  | 7.048  | 17.111 | 11.749 |
| 5 | 0.4670 | 13.189 | 10.319 | 8.779  | 15.783 | 12.007 |
| 5 | 0.4680 | 8.028  | 5.559  | 9.914  | 18.583 | 4.660  |
| 5 | 0.4690 | 12.083 | 10.891 | 14.219 | 13.111 | 5.274  |
| 5 | 0.4700 | 17.183 | 11.222 | 13.247 | 8.457  | 8.275  |
| 5 | 0.4710 | 10.727 | 11.435 | 11.459 | 12.318 | 16.960 |
| 5 | 0.4720 | 11.582 | 5.879  | 8.710  | 10.106 | 7.571  |
| 5 | 0.4730 | 10.279 | 8.482  | 9.961  | 11.871 | 5.797  |
| 5 | 0.4740 | 20.202 | 16.967 | 18.779 | 26.962 | 16.789 |
| 5 | 0.4750 | 15.833 | 14.278 | 17.730 | 24.814 | 6.021  |
| 5 | 0.4760 | 5.535  | 8.235  | 6.451  | 16.506 | 10.390 |
| 5 | 0.4770 | 5.993  | 13.077 | 12.334 | 17.589 | 12.824 |
| 5 | 0.4780 | 5.995  | 13.066 | 12.316 | 17.438 | 12.846 |
| 5 | 0.4790 | 4.429  | 5.832  | 5.684  | 4.149  | 8.173  |
| 5 | 0.4800 | 2.595  | 4.799  | 7.268  | 5.325  | 6.120  |
| 5 | 0.4810 | 9.072  | 9.519  | 9.299  | 10.070 | 12.372 |
| 5 | 0.4820 | 20.394 | 15.160 | 15.658 | 16.131 | 9.968  |
| 5 | 0.4830 | 27.483 | 14.954 | 15.266 | 12.320 | 18.532 |
| 5 | 0.4840 | 16.465 | 13.327 | 14.713 | 18.972 | 13.108 |
| 5 | 0.4850 | 13.934 | 15.745 | 12.899 | 12.685 | 17.528 |
| 5 | 0.4860 | 16.247 | 22.752 | 14.619 | 14.286 | 8.900  |
| 5 | 0.4870 | 17.415 | 11.444 | 15.834 | 18.310 | 11.889 |
| 5 | 0.4880 | 17.582 | 15.206 | 16.829 | 14.374 | 12.481 |
| 5 | 0.4890 | 11.048 | 9.351  | 8.555  | 18.157 | 12.922 |
| 5 | 0.4900 | 7.818  | 14.959 | 9.760  | 12.739 | 8.500  |
| 5 | 0.4910 | 17.603 | 13.578 | 14.893 | 9.284  | 9.458  |
| 5 | 0.4920 | 6.382  | 4.757  | 3.950  | 15.438 | 13.321 |
| 5 | 0.4930 | 13.484 | 13.146 | 12.581 | 13.489 | 10.561 |
| 5 | 0.4940 | 13.442 | 18.988 | 15.943 | 15.185 | 8.950  |
| 5 | 0.4950 | 20.080 | 11.255 | 13.704 | 7.103  | 10.026 |
| 5 | 0.4960 | 3.090  | 1.360  | 2.625  | 7.215  | 6.816  |
| 5 | 0.4970 | 21.831 | 21.783 | 24.483 | 10.558 | 17.693 |
| 5 | 0.4980 | 11.916 | 14.217 | 12.103 | 9.966  | 4.391  |
| 5 | 0.4990 | 6.538  | 7.246  | 4.750  | 4.696  | 5.102  |
| 5 | 0.5000 | 9.810  | 9.712  | 6.904  | 17.981 | 9.283  |
| 5 | 0.5010 | 6.020  | 5.218  | 4.663  | 11.120 | 4.939  |
| 5 | 0.5020 | 8.774  | 9.096  | 6.011  | 10.009 | 7.115  |
| 5 | 0.5030 | 11.654 | 4.368  | 8.772  | 13.049 | 6.188  |
| 5 | 0.5040 | 8.831  | 10.553 | 12.811 | 5.979  | 6.566  |
| 5 | 0.5050 | 10.444 | 8.676  | 5.507  | 2.972  | 1.926  |
| 5 | 0.5060 | 15.273 | 9.340  | 11.142 | 12.188 | 6.888  |
| 5 | 0.5070 | 11.365 | 12.318 | 7.858  | 14.504 | 5.553  |
| 5 | 0.5080 | 12.459 | 11.127 | 8.536  | 13.952 | 8.060  |
| 5 | 0.5090 | 12.394 | 11.282 | 12.957 | 12.222 | 8.179  |
| 5 | 0.5100 | 16.934 | 9.141  | 10.658 | 18.017 | 11.085 |
| 5 | 0.5110 | 21.977 | 11.845 | 11.419 | 10.082 | 14.043 |
| 5 | 0.5120 | 16.409 | 9.569  | 10.111 | 10.630 | 22.720 |
| 5 | 0.5130 | 13.976 | 6.914  | 3.975  | 8.679  | 11.335 |
| 5 | 0.5140 | 17.235 | 7.043  | 5.484  | 13.542 | 4.873  |
| 5 | 0.5150 | 9.396  | 12.404 | 7.125  | 17.550 | 7.091  |

|   |        |        |        |        |        |        |
|---|--------|--------|--------|--------|--------|--------|
| 5 | 0.5160 | 13.048 | 7.719  | 8.905  | 15.301 | 11.997 |
| 5 | 0.5170 | 15.562 | 15.212 | 12.403 | 20.824 | 19.478 |
| 5 | 0.5180 | 8.603  | 8.304  | 7.563  | 8.702  | 7.891  |
| 5 | 0.5190 | 3.581  | 5.923  | 5.826  | 10.586 | 4.114  |
| 5 | 0.5200 | 5.375  | 6.773  | 4.494  | 8.808  | 8.385  |
| 5 | 0.5210 | 18.998 | 11.041 | 13.655 | 18.248 | 6.598  |
| 5 | 0.5220 | 7.720  | 8.117  | 4.892  | 12.920 | 9.646  |
| 5 | 0.5230 | 15.395 | 8.204  | 7.932  | 14.914 | 11.109 |
| 5 | 0.5240 | 9.767  | 4.149  | 7.090  | 3.728  | 7.774  |
| 5 | 0.5250 | 12.130 | 4.332  | 6.957  | 3.182  | 6.181  |
| 5 | 0.5260 | 6.687  | 4.231  | 7.428  | 3.378  | 3.560  |
| 5 | 0.5270 | 7.064  | 7.700  | 5.966  | 2.073  | 3.738  |
| 5 | 0.5280 | 4.672  | 3.372  | 1.895  | 7.368  | 7.978  |
| 5 | 0.5290 | 4.876  | 7.177  | 3.338  | 14.615 | 8.131  |
| 5 | 0.5300 | 4.927  | 7.231  | 3.366  | 14.606 | 8.165  |
| 5 | 0.5310 | 14.545 | 12.999 | 11.567 | 9.861  | 10.161 |
| 5 | 0.5320 | 9.531  | 8.333  | 9.247  | 7.125  | 10.291 |
| 5 | 0.5330 | 8.426  | 8.260  | 9.798  | 14.373 | 11.527 |
| 5 | 0.5340 | 16.085 | 11.361 | 17.321 | 22.902 | 13.824 |
| 5 | 0.5350 | 16.156 | 9.829  | 12.924 | 14.768 | 6.589  |
| 5 | 0.5360 | 12.788 | 8.600  | 13.983 | 6.892  | 3.957  |
| 5 | 0.5370 | 20.351 | 15.787 | 19.078 | 7.096  | 5.548  |
| 5 | 0.5380 | 14.267 | 9.980  | 14.759 | 3.524  | 9.318  |
| 5 | 0.5390 | 10.862 | 9.684  | 15.272 | 2.893  | 5.843  |
| 5 | 0.5400 | 9.608  | 9.407  | 11.900 | 5.126  | 4.560  |
| 5 | 0.5410 | 21.298 | 16.860 | 20.067 | 8.042  | 9.256  |
| 5 | 0.5420 | 17.440 | 8.574  | 12.216 | 3.492  | 11.418 |
| 5 | 0.5430 | 14.050 | 8.427  | 8.980  | 6.625  | 11.413 |
| 5 | 0.5440 | 11.563 | 5.956  | 8.025  | 3.419  | 5.300  |
| 5 | 0.5450 | 18.740 | 10.491 | 10.443 | 3.358  | 5.490  |
| 5 | 0.5460 | 18.708 | 10.824 | 11.398 | 2.959  | 7.374  |
| 5 | 0.5470 | 16.915 | 8.513  | 15.761 | 4.281  | 7.453  |
| 5 | 0.5480 | 23.867 | 16.086 | 20.134 | 7.959  | 10.537 |
| 5 | 0.5490 | 13.206 | 14.906 | 16.497 | 9.296  | 12.755 |
| 5 | 0.5500 | 10.690 | 9.043  | 10.509 | 4.457  | 10.425 |
| 5 | 0.5510 | 13.710 | 9.452  | 12.735 | 5.526  | 10.054 |
| 5 | 0.5520 | 4.832  | 5.757  | 6.909  | 6.489  | 9.616  |
| 5 | 0.5530 | 4.849  | 5.742  | 6.914  | 6.487  | 9.608  |
| 5 | 0.5540 | 7.412  | 8.609  | 10.951 | 10.763 | 16.117 |
| 5 | 0.5550 | 13.057 | 14.249 | 15.038 | 5.192  | 8.007  |
| 5 | 0.5560 | 12.596 | 11.221 | 12.314 | 4.003  | 6.185  |
| 5 | 0.5570 | 16.630 | 11.941 | 12.304 | 5.254  | 5.364  |
| 5 | 0.5580 | 9.096  | 6.569  | 5.293  | 10.307 | 16.206 |
| 5 | 0.5590 | 8.343  | 7.405  | 9.712  | 6.027  | 20.708 |
| 5 | 0.5600 | 17.925 | 16.215 | 16.481 | 3.193  | 7.426  |
| 5 | 0.5610 | 13.420 | 8.761  | 7.346  | 16.811 | 17.657 |
| 5 | 0.5620 | 12.747 | 13.361 | 12.884 | 18.884 | 16.290 |
| 5 | 0.5630 | 10.325 | 12.783 | 10.121 | 15.090 | 20.971 |
| 5 | 0.5640 | 12.083 | 12.143 | 9.913  | 10.186 | 14.624 |
| 5 | 0.5650 | 18.046 | 9.442  | 11.076 | 8.983  | 8.426  |

|   |        |        |        |        |        |        |
|---|--------|--------|--------|--------|--------|--------|
| 5 | 0.5660 | 15.356 | 11.792 | 10.787 | 9.369  | 6.859  |
| 5 | 0.5670 | 11.179 | 7.429  | 5.737  | 3.836  | 6.349  |
| 5 | 0.5680 | 23.401 | 15.200 | 19.355 | 5.424  | 4.797  |
| 5 | 0.5690 | 7.187  | 5.763  | 7.325  | 8.313  | 4.035  |
| 5 | 0.5700 | 12.621 | 13.347 | 13.666 | 12.676 | 11.379 |
| 5 | 0.5710 | 12.617 | 13.350 | 13.670 | 12.675 | 11.377 |
| 5 | 0.5720 | 12.614 | 13.353 | 13.673 | 12.674 | 11.375 |
| 5 | 0.5730 | 23.837 | 21.427 | 24.523 | 12.330 | 10.083 |
| 5 | 0.5740 | 32.089 | 24.724 | 31.311 | 11.256 | 7.580  |
| 5 | 0.5750 | 21.774 | 16.453 | 21.423 | 10.090 | 5.829  |
| 5 | 0.5760 | 21.783 | 16.459 | 21.420 | 10.126 | 5.827  |
| 5 | 0.5770 | 24.414 | 20.165 | 21.479 | 9.301  | 8.372  |
| 5 | 0.5780 | 24.114 | 11.140 | 17.727 | 18.233 | 20.955 |
| 5 | 0.5790 | 24.581 | 8.608  | 17.662 | 5.858  | 9.280  |
| 5 | 0.5800 | 18.447 | 7.102  | 10.897 | 6.317  | 14.390 |
| 5 | 0.5810 | 9.018  | 6.522  | 8.937  | 2.831  | 8.049  |
| 5 | 0.5820 | 14.470 | 9.778  | 14.330 | 5.012  | 12.042 |
| 5 | 0.5830 | 10.369 | 18.674 | 12.019 | 10.290 | 12.184 |
| 5 | 0.5840 | 14.617 | 8.139  | 10.341 | 5.414  | 10.421 |
| 5 | 0.5850 | 18.929 | 10.470 | 15.519 | 3.833  | 8.507  |
| 5 | 0.5860 | 15.174 | 8.920  | 17.178 | 9.380  | 15.156 |
| 5 | 0.5870 | 21.302 | 15.141 | 11.521 | 9.770  | 9.300  |
| 5 | 0.5880 | 17.983 | 11.037 | 8.645  | 9.160  | 8.663  |
| 5 | 0.5890 | 16.801 | 10.277 | 9.123  | 7.783  | 5.658  |
| 5 | 0.5900 | 13.264 | 6.765  | 4.937  | 3.364  | 5.787  |
| 5 | 0.5910 | 15.640 | 11.553 | 7.899  | 3.635  | 2.689  |
| 5 | 0.5920 | 9.437  | 11.036 | 8.645  | 17.692 | 16.953 |
| 5 | 0.5930 | 12.524 | 15.989 | 10.781 | 11.698 | 12.208 |
| 5 | 0.5940 | 14.309 | 14.409 | 15.925 | 8.890  | 9.906  |
| 5 | 0.5950 | 14.876 | 13.332 | 12.984 | 5.498  | 8.252  |
| 5 | 0.5960 | 28.846 | 16.210 | 22.769 | 14.800 | 9.966  |
| 5 | 0.5970 | 14.634 | 15.760 | 15.559 | 10.807 | 13.453 |
| 5 | 0.5980 | 8.685  | 4.667  | 7.894  | 5.969  | 8.509  |
| 5 | 0.5990 | 8.972  | 6.847  | 9.533  | 5.698  | 7.671  |
| 5 | 0.6000 | 14.328 | 16.264 | 15.990 | 11.713 | 7.179  |
| 5 | 0.6010 | 14.401 | 16.401 | 16.059 | 11.692 | 7.187  |
| 5 | 0.6020 | 9.240  | 9.875  | 8.659  | 16.034 | 14.476 |
| 5 | 0.6030 | 11.661 | 10.395 | 7.571  | 13.276 | 5.889  |
| 5 | 0.6040 | 12.210 | 12.367 | 12.415 | 3.871  | 2.062  |
| 5 | 0.6050 | 9.289  | 9.808  | 8.347  | 10.063 | 3.326  |
| 5 | 0.6060 | 10.219 | 10.447 | 6.711  | 8.177  | 13.744 |
| 5 | 0.6070 | 16.829 | 18.491 | 15.151 | 14.785 | 13.518 |
| 5 | 0.6080 | 11.184 | 15.834 | 13.503 | 24.712 | 14.217 |
| 5 | 0.6090 | 9.999  | 9.028  | 7.359  | 11.162 | 8.690  |
| 5 | 0.6100 | 12.238 | 11.200 | 10.573 | 4.805  | 4.903  |
| 5 | 0.6110 | 19.871 | 18.669 | 17.630 | 14.946 | 11.187 |
| 5 | 0.6120 | 16.751 | 17.619 | 15.650 | 14.000 | 13.667 |
| 5 | 0.6130 | 12.979 | 21.835 | 12.414 | 20.804 | 13.080 |
| 5 | 0.6140 | 9.965  | 19.296 | 16.736 | 18.364 | 10.676 |
| 5 | 0.6150 | 14.107 | 10.367 | 13.992 | 9.811  | 7.232  |

|   |        |        |        |        |        |        |
|---|--------|--------|--------|--------|--------|--------|
| 5 | 0.6160 | 14.104 | 10.503 | 14.094 | 9.772  | 7.223  |
| 5 | 0.6170 | 24.138 | 18.420 | 17.055 | 14.087 | 17.229 |
| 5 | 0.6180 | 18.536 | 14.892 | 14.907 | 12.058 | 3.799  |
| 5 | 0.6190 | 9.710  | 11.090 | 7.985  | 6.403  | 7.907  |
| 5 | 0.6200 | 8.727  | 13.616 | 8.209  | 11.925 | 11.540 |
| 5 | 0.6210 | 18.452 | 13.152 | 16.065 | 10.272 | 13.512 |
| 5 | 0.6220 | 15.129 | 9.476  | 16.156 | 14.676 | 19.473 |
| 5 | 0.6230 | 12.337 | 7.066  | 10.694 | 11.079 | 10.957 |
| 5 | 0.6240 | 10.938 | 15.166 | 13.294 | 12.480 | 11.724 |
| 5 | 0.6250 | 15.080 | 16.736 | 14.987 | 11.107 | 11.931 |
| 5 | 0.6260 | 11.527 | 16.862 | 10.734 | 18.188 | 10.199 |
| 5 | 0.6270 | 18.071 | 16.865 | 18.886 | 7.673  | 9.199  |
| 5 | 0.6280 | 23.431 | 22.729 | 20.719 | 5.711  | 15.578 |
| 5 | 0.6290 | 18.517 | 17.795 | 16.448 | 13.198 | 10.007 |
| 5 | 0.6300 | 13.571 | 15.565 | 15.915 | 13.556 | 14.748 |
| 5 | 0.6310 | 7.808  | 7.579  | 5.768  | 10.827 | 2.980  |
| 5 | 0.6320 | 10.991 | 11.078 | 11.888 | 19.393 | 10.415 |
| 5 | 0.6330 | 29.284 | 16.549 | 24.888 | 10.421 | 16.750 |
| 5 | 0.6340 | 22.993 | 16.124 | 15.679 | 13.934 | 3.610  |
| 5 | 0.6350 | 24.217 | 13.638 | 14.295 | 11.306 | 8.407  |
| 5 | 0.6360 | 11.420 | 14.888 | 10.567 | 7.079  | 5.681  |
| 5 | 0.6370 | 6.968  | 8.276  | 7.596  | 5.904  | 9.038  |
| 5 | 0.6380 | 15.418 | 14.757 | 15.627 | 6.535  | 3.828  |
| 5 | 0.6390 | 8.676  | 14.838 | 9.400  | 10.625 | 5.725  |
| 5 | 0.6400 | 8.531  | 13.807 | 7.482  | 10.832 | 6.160  |
| 5 | 0.6410 | 17.595 | 14.787 | 13.139 | 10.384 | 9.179  |
| 5 | 0.6420 | 15.290 | 10.646 | 15.254 | 6.516  | 14.896 |
| 5 | 0.6430 | 7.893  | 10.613 | 12.922 | 10.493 | 18.369 |
| 5 | 0.6440 | 9.334  | 12.281 | 12.078 | 12.878 | 11.856 |
| 5 | 0.6450 | 18.185 | 9.075  | 13.821 | 7.404  | 10.127 |
| 5 | 0.6460 | 18.945 | 12.768 | 11.376 | 4.596  | 8.727  |
| 5 | 0.6470 | 8.464  | 3.425  | 5.994  | 5.667  | 6.433  |
| 5 | 0.6480 | 14.144 | 20.053 | 23.270 | 18.528 | 11.419 |
| 5 | 0.6490 | 17.233 | 18.940 | 16.286 | 23.681 | 11.333 |
| 5 | 0.6500 | 6.866  | 11.340 | 8.352  | 21.909 | 14.425 |
| 5 | 0.6510 | 8.095  | 11.514 | 9.987  | 12.323 | 7.215  |
| 5 | 0.6520 | 7.682  | 11.793 | 9.208  | 19.188 | 12.892 |
| 5 | 0.6530 | 6.755  | 15.239 | 9.075  | 15.934 | 13.927 |
| 5 | 0.6540 | 5.262  | 9.561  | 8.038  | 13.043 | 22.791 |
| 5 | 0.6550 | 4.510  | 12.332 | 7.593  | 19.639 | 16.226 |
| 5 | 0.6560 | 4.116  | 7.985  | 5.252  | 7.561  | 7.563  |
| 5 | 0.6570 | 5.988  | 11.647 | 6.882  | 7.759  | 3.714  |
| 5 | 0.6580 | 6.388  | 8.911  | 5.806  | 8.851  | 6.629  |
| 5 | 0.6590 | 7.700  | 13.089 | 7.526  | 16.995 | 14.690 |
| 5 | 0.6600 | 27.519 | 25.072 | 19.441 | 21.159 | 18.821 |
| 5 | 0.6610 | 11.025 | 12.362 | 9.612  | 24.074 | 14.291 |
| 5 | 0.6620 | 19.875 | 13.695 | 17.891 | 9.397  | 7.372  |
| 5 | 0.6630 | 15.578 | 12.330 | 9.564  | 12.388 | 10.073 |
| 5 | 0.6640 | 18.123 | 11.443 | 11.453 | 12.572 | 10.956 |
| 5 | 0.6650 | 16.436 | 11.119 | 11.838 | 18.866 | 5.251  |

|   |        |        |        |        |        |        |
|---|--------|--------|--------|--------|--------|--------|
| 5 | 0.6660 | 14.313 | 19.619 | 17.482 | 9.077  | 6.426  |
| 5 | 0.6670 | 12.632 | 10.087 | 9.282  | 7.588  | 4.269  |
| 5 | 0.6680 | 10.011 | 11.593 | 8.126  | 5.836  | 5.470  |
| 5 | 0.6690 | 12.636 | 16.883 | 12.398 | 15.690 | 22.331 |
| 5 | 0.6700 | 14.181 | 15.406 | 11.593 | 13.145 | 10.896 |
| 5 | 0.6710 | 10.506 | 7.388  | 6.977  | 11.364 | 9.503  |
| 5 | 0.6720 | 7.766  | 7.794  | 4.520  | 4.579  | 7.898  |
| 5 | 0.6730 | 10.508 | 9.683  | 7.075  | 13.661 | 12.459 |
| 5 | 0.6740 | 11.480 | 12.578 | 10.577 | 20.461 | 11.174 |
| 5 | 0.6750 | 11.520 | 17.608 | 8.067  | 19.165 | 11.936 |
| 5 | 0.6760 | 7.186  | 17.859 | 7.023  | 19.660 | 14.000 |
| 5 | 0.6770 | 9.214  | 16.182 | 8.986  | 17.909 | 6.175  |
| 5 | 0.6780 | 10.738 | 14.006 | 8.050  | 20.311 | 16.375 |
| 5 | 0.6790 | 9.025  | 8.787  | 3.663  | 12.494 | 6.690  |
| 5 | 0.6800 | 5.737  | 9.843  | 3.659  | 11.071 | 4.442  |
| 5 | 0.6810 | 5.647  | 9.789  | 3.588  | 11.078 | 4.403  |
| 5 | 0.6820 | 3.079  | 5.063  | 3.940  | 4.691  | 4.131  |
| 5 | 0.6830 | 2.999  | 5.030  | 3.899  | 4.734  | 4.150  |
| 5 | 0.6840 | 10.146 | 5.786  | 9.654  | 20.577 | 14.729 |
| 5 | 0.6850 | 4.759  | 7.530  | 2.048  | 22.376 | 13.145 |
| 5 | 0.6860 | 9.840  | 8.706  | 9.256  | 7.624  | 7.410  |
| 5 | 0.6870 | 9.212  | 13.008 | 11.978 | 11.057 | 10.769 |
| 5 | 0.6880 | 9.253  | 12.242 | 7.093  | 10.420 | 6.637  |
| 5 | 0.6890 | 22.027 | 9.926  | 12.277 | 13.952 | 8.314  |
| 5 | 0.6900 | 13.402 | 6.341  | 7.915  | 6.833  | 8.605  |
| 5 | 0.6910 | 13.382 | 6.327  | 7.900  | 6.813  | 8.626  |
| 5 | 0.6920 | 10.137 | 7.071  | 8.497  | 4.387  | 3.930  |
| 5 | 0.6930 | 5.543  | 2.926  | 5.192  | 1.056  | 2.182  |
| 5 | 0.6940 | 6.545  | 9.791  | 5.653  | 15.343 | 4.078  |
| 5 | 0.6950 | 19.906 | 17.441 | 14.831 | 8.901  | 4.899  |
| 5 | 0.6960 | 19.897 | 17.438 | 14.829 | 8.905  | 4.897  |
| 5 | 0.6970 | 17.301 | 4.952  | 6.608  | 19.840 | 10.985 |
| 5 | 0.6980 | 13.137 | 9.426  | 10.097 | 16.789 | 14.021 |
| 5 | 0.6990 | 15.938 | 9.298  | 9.026  | 10.488 | 7.676  |
| 5 | 0.7000 | 13.286 | 8.302  | 5.732  | 7.230  | 12.294 |
| 5 | 0.7010 | 4.297  | 6.949  | 5.612  | 15.390 | 17.052 |
| 5 | 0.7020 | 11.504 | 12.102 | 10.325 | 17.476 | 24.982 |
| 5 | 0.7030 | 11.065 | 11.342 | 8.549  | 17.572 | 15.548 |
| 5 | 0.7040 | 10.746 | 10.902 | 9.773  | 15.095 | 9.011  |
| 5 | 0.7050 | 9.196  | 10.868 | 12.714 | 15.527 | 11.803 |
| 5 | 0.7060 | 11.336 | 13.145 | 13.586 | 14.218 | 12.330 |
| 5 | 0.7070 | 10.756 | 6.733  | 8.558  | 5.157  | 15.850 |
| 5 | 0.7080 | 19.208 | 15.545 | 19.284 | 10.373 | 14.497 |
| 5 | 0.7090 | 13.934 | 10.864 | 9.406  | 12.785 | 12.614 |
| 5 | 0.7100 | 7.753  | 9.327  | 7.580  | 9.748  | 12.865 |
| 5 | 0.7110 | 24.914 | 12.268 | 20.991 | 12.084 | 10.281 |
| 5 | 0.7120 | 27.786 | 13.448 | 20.884 | 12.397 | 7.211  |
| 5 | 0.7130 | 22.963 | 9.795  | 17.398 | 14.802 | 8.667  |
| 5 | 0.7140 | 7.049  | 6.104  | 6.857  | 8.706  | 9.198  |
| 5 | 0.7150 | 7.597  | 6.529  | 7.050  | 4.377  | 7.250  |

|   |        |        |        |        |        |        |
|---|--------|--------|--------|--------|--------|--------|
| 5 | 0.7160 | 4.264  | 2.653  | 2.331  | 4.503  | 6.413  |
| 5 | 0.7170 | 6.147  | 12.094 | 7.349  | 9.190  | 10.968 |
| 5 | 0.7180 | 2.578  | 3.640  | 4.520  | 2.266  | 5.324  |
| 5 | 0.7190 | 2.484  | 4.039  | 2.971  | 2.180  | 9.235  |
| 5 | 0.7200 | 2.537  | 5.902  | 4.998  | 5.035  | 12.009 |
| 5 | 0.7210 | 8.038  | 15.962 | 11.645 | 11.256 | 8.402  |
| 5 | 0.7220 | 11.621 | 18.030 | 17.103 | 6.383  | 17.454 |
| 5 | 0.7230 | 7.702  | 12.335 | 6.268  | 5.559  | 14.340 |
| 5 | 0.7240 | 16.139 | 12.825 | 11.677 | 7.174  | 9.629  |
| 5 | 0.7250 | 9.641  | 14.012 | 8.136  | 7.968  | 10.197 |
| 5 | 0.7260 | 10.634 | 11.883 | 11.823 | 10.975 | 15.860 |
| 5 | 0.7270 | 3.853  | 7.861  | 5.177  | 12.270 | 6.814  |
| 5 | 0.7280 | 16.678 | 10.004 | 13.995 | 5.790  | 8.026  |
| 5 | 0.7290 | 14.478 | 17.062 | 17.607 | 11.855 | 14.472 |
| 5 | 0.7300 | 14.093 | 19.519 | 17.140 | 15.096 | 17.244 |
| 5 | 0.7310 | 19.275 | 20.234 | 18.530 | 14.446 | 9.393  |
| 5 | 0.7320 | 13.152 | 15.680 | 16.027 | 14.677 | 8.283  |
| 5 | 0.7330 | 6.420  | 14.216 | 12.288 | 9.582  | 8.452  |
| 5 | 0.7340 | 11.153 | 11.138 | 11.113 | 9.352  | 9.004  |
| 5 | 0.7350 | 13.405 | 9.567  | 14.316 | 12.660 | 6.889  |
| 5 | 0.7360 | 4.857  | 7.202  | 4.224  | 15.962 | 9.162  |
| 5 | 0.7370 | 5.201  | 2.910  | 3.186  | 1.319  | 5.019  |
| 5 | 0.7380 | 6.946  | 14.253 | 8.219  | 22.700 | 13.912 |
| 5 | 0.7390 | 4.238  | 7.482  | 3.177  | 5.881  | 7.243  |
| 5 | 0.7400 | 4.237  | 7.475  | 3.176  | 5.885  | 7.269  |
| 5 | 0.7410 | 13.731 | 13.186 | 14.900 | 8.548  | 10.826 |
| 5 | 0.7420 | 7.400  | 1.829  | 7.736  | 16.401 | 18.528 |
| 5 | 0.7430 | 6.567  | 2.874  | 6.192  | 15.808 | 19.125 |
| 5 | 0.7440 | 7.853  | 11.944 | 7.521  | 19.352 | 6.253  |
| 5 | 0.7450 | 7.855  | 5.820  | 7.371  | 12.768 | 8.403  |
| 5 | 0.7460 | 3.326  | 7.133  | 3.831  | 14.675 | 9.828  |
| 5 | 0.7470 | 4.199  | 6.061  | 3.875  | 6.932  | 9.428  |
| 5 | 0.7480 | 10.634 | 8.890  | 9.533  | 5.771  | 8.925  |
| 5 | 0.7490 | 6.953  | 13.725 | 10.782 | 8.414  | 6.164  |
| 5 | 0.7500 | 6.702  | 15.804 | 9.460  | 14.226 | 5.164  |
| 5 | 0.7510 | 2.873  | 8.087  | 3.521  | 19.017 | 4.402  |
| 5 | 0.7520 | 1.622  | 4.053  | 1.809  | 10.687 | 3.519  |
| 5 | 0.7530 | 6.991  | 9.969  | 4.609  | 10.581 | 6.886  |
| 5 | 0.7540 | 5.201  | 4.539  | 2.368  | 15.378 | 9.807  |
| 5 | 0.7550 | 6.088  | 7.451  | 8.978  | 5.506  | 5.080  |
| 5 | 0.7560 | 7.685  | 8.660  | 10.375 | 8.646  | 2.911  |
| 5 | 0.7570 | 11.324 | 7.258  | 5.875  | 8.614  | 11.632 |
| 5 | 0.7580 | 13.803 | 18.868 | 11.233 | 9.951  | 11.029 |
| 5 | 0.7590 | 25.701 | 21.481 | 17.813 | 5.535  | 15.961 |
| 5 | 0.7600 | 12.638 | 8.512  | 4.611  | 8.725  | 17.076 |
| 5 | 0.7610 | 8.047  | 8.823  | 7.439  | 6.087  | 6.713  |
| 5 | 0.7620 | 5.359  | 7.253  | 5.879  | 9.604  | 9.057  |
| 5 | 0.7630 | 8.881  | 8.444  | 8.678  | 15.474 | 12.981 |
| 5 | 0.7640 | 9.161  | 8.552  | 8.149  | 13.436 | 9.134  |
| 5 | 0.7650 | 6.184  | 6.116  | 4.604  | 17.111 | 11.855 |

|   |        |        |        |        |        |        |
|---|--------|--------|--------|--------|--------|--------|
| 5 | 0.7660 | 8.150  | 12.147 | 7.169  | 12.720 | 8.361  |
| 5 | 0.7670 | 10.305 | 16.751 | 12.717 | 18.430 | 20.480 |
| 5 | 0.7680 | 9.948  | 13.173 | 15.015 | 7.261  | 20.020 |
| 5 | 0.7690 | 9.445  | 9.709  | 12.393 | 9.715  | 12.893 |
| 5 | 0.7700 | 13.066 | 17.398 | 20.734 | 6.186  | 9.910  |
| 5 | 0.7710 | 2.093  | 11.125 | 6.838  | 10.862 | 11.513 |
| 5 | 0.7720 | 2.732  | 6.119  | 4.874  | 9.271  | 15.158 |
| 5 | 0.7730 | 10.966 | 10.415 | 11.075 | 9.395  | 7.363  |
| 5 | 0.7740 | 11.498 | 8.107  | 10.298 | 14.219 | 6.750  |
| 5 | 0.7750 | 19.287 | 21.545 | 16.907 | 10.249 | 8.132  |
| 5 | 0.7760 | 9.048  | 11.374 | 10.749 | 11.379 | 6.061  |
| 5 | 0.7770 | 10.738 | 8.555  | 7.169  | 3.411  | 2.866  |
| 5 | 0.7780 | 21.210 | 17.255 | 16.322 | 12.152 | 11.291 |
| 5 | 0.7790 | 20.835 | 16.251 | 16.540 | 3.491  | 4.953  |
| 5 | 0.7800 | 8.562  | 12.427 | 9.129  | 9.457  | 2.565  |
| 5 | 0.7810 | 11.052 | 16.454 | 14.165 | 15.177 | 6.360  |
| 5 | 0.7820 | 13.300 | 19.229 | 13.787 | 12.668 | 14.787 |
| 5 | 0.7830 | 14.376 | 18.272 | 12.303 | 14.252 | 16.506 |
| 5 | 0.7840 | 20.231 | 17.866 | 19.840 | 9.466  | 9.294  |
| 5 | 0.7850 | 16.059 | 10.229 | 10.607 | 9.277  | 5.037  |
| 5 | 0.7860 | 11.169 | 12.345 | 10.567 | 5.331  | 6.524  |
| 5 | 0.7870 | 22.092 | 19.673 | 17.893 | 7.873  | 7.782  |
| 5 | 0.7880 | 11.386 | 8.329  | 8.415  | 7.400  | 6.054  |
| 5 | 0.7890 | 4.012  | 8.017  | 9.084  | 4.950  | 3.338  |
| 5 | 0.7900 | 11.815 | 15.569 | 12.531 | 8.589  | 10.620 |
| 5 | 0.7910 | 9.811  | 15.667 | 9.618  | 9.810  | 9.629  |
| 5 | 0.7920 | 17.356 | 19.933 | 11.020 | 15.012 | 18.494 |
| 5 | 0.7930 | 22.472 | 18.280 | 15.507 | 15.763 | 16.320 |
| 5 | 0.7940 | 18.596 | 14.728 | 11.243 | 26.035 | 15.596 |
| 5 | 0.7950 | 12.089 | 12.979 | 8.769  | 18.454 | 17.249 |
| 5 | 0.7960 | 19.176 | 18.754 | 24.240 | 12.950 | 16.353 |
| 5 | 0.7970 | 26.270 | 24.398 | 28.641 | 16.546 | 7.729  |
| 5 | 0.7980 | 21.527 | 18.052 | 19.139 | 8.842  | 10.383 |
| 5 | 0.7990 | 21.454 | 18.025 | 19.169 | 8.762  | 10.278 |
| 5 | 0.8000 | 21.589 | 19.682 | 27.429 | 14.567 | 23.075 |
| 5 | 0.8010 | 20.174 | 18.185 | 21.749 | 9.739  | 16.711 |
| 5 | 0.8020 | 29.706 | 29.324 | 42.257 | 11.201 | 18.827 |
| 5 | 0.8030 | 9.866  | 6.299  | 9.536  | 3.414  | 12.005 |
| 5 | 0.8040 | 7.712  | 6.584  | 5.937  | 3.886  | 11.194 |
| 5 | 0.8050 | 18.796 | 19.765 | 20.100 | 7.878  | 24.279 |
| 5 | 0.8060 | 23.366 | 21.465 | 21.198 | 16.327 | 22.563 |
| 5 | 0.8070 | 10.613 | 10.474 | 7.633  | 5.551  | 14.091 |
| 5 | 0.8080 | 6.707  | 5.650  | 8.386  | 2.965  | 1.506  |
| 5 | 0.8090 | 11.336 | 10.259 | 11.843 | 2.682  | 7.614  |
| 5 | 0.8100 | 12.655 | 12.659 | 9.329  | 13.875 | 10.822 |
| 5 | 0.8110 | 11.557 | 12.507 | 9.612  | 10.906 | 30.134 |
| 5 | 0.8120 | 24.628 | 18.861 | 20.859 | 10.736 | 25.700 |
| 5 | 0.8130 | 18.573 | 18.728 | 17.474 | 7.766  | 26.174 |
| 5 | 0.8140 | 35.830 | 26.599 | 33.321 | 23.280 | 18.596 |
| 5 | 0.8150 | 19.676 | 11.336 | 10.773 | 18.947 | 26.016 |

|   |        |        |        |        |        |        |
|---|--------|--------|--------|--------|--------|--------|
| 5 | 0.8160 | 22.527 | 16.815 | 23.371 | 16.815 | 11.866 |
| 5 | 0.8170 | 16.138 | 15.128 | 10.098 | 19.237 | 19.360 |
| 5 | 0.8180 | 11.188 | 12.673 | 15.812 | 10.297 | 15.081 |
| 5 | 0.8190 | 11.607 | 18.486 | 17.692 | 13.156 | 13.570 |
| 5 | 0.8200 | 23.344 | 27.746 | 29.401 | 14.743 | 22.765 |
| 5 | 0.8210 | 16.315 | 23.608 | 16.450 | 12.188 | 21.082 |
| 5 | 0.8220 | 24.231 | 33.334 | 25.201 | 11.076 | 24.323 |
| 5 | 0.8230 | 11.188 | 14.786 | 8.488  | 8.910  | 28.137 |
| 5 | 0.8240 | 11.783 | 13.025 | 11.229 | 18.766 | 9.312  |
| 5 | 0.8250 | 23.365 | 23.149 | 26.369 | 12.175 | 12.407 |
| 5 | 0.8260 | 10.844 | 14.374 | 14.280 | 13.323 | 22.249 |
| 5 | 0.8270 | 23.561 | 24.254 | 19.440 | 11.070 | 22.089 |
| 5 | 0.8280 | 12.861 | 16.310 | 14.360 | 10.390 | 22.132 |
| 5 | 0.8290 | 22.126 | 16.343 | 21.653 | 15.674 | 23.414 |
| 5 | 0.8300 | 12.982 | 13.813 | 14.122 | 9.523  | 16.876 |
| 5 | 0.8310 | 17.607 | 14.048 | 18.104 | 13.768 | 11.893 |
| 5 | 0.8320 | 23.575 | 18.970 | 21.889 | 13.088 | 19.667 |
| 5 | 0.8330 | 8.184  | 10.650 | 5.571  | 12.949 | 16.673 |
| 5 | 0.8340 | 8.283  | 10.686 | 5.571  | 13.059 | 16.978 |
| 5 | 0.8350 | 20.878 | 13.788 | 18.886 | 5.351  | 18.661 |
| 5 | 0.8360 | 16.208 | 11.894 | 16.066 | 4.418  | 14.692 |
| 5 | 0.8370 | 13.917 | 12.937 | 9.036  | 10.710 | 21.268 |
| 5 | 0.8380 | 10.552 | 10.046 | 6.873  | 6.028  | 19.002 |
| 5 | 0.8390 | 25.690 | 22.341 | 25.636 | 9.544  | 13.673 |
| 5 | 0.8400 | 25.707 | 22.347 | 25.626 | 9.581  | 13.722 |
| 5 | 0.8410 | 18.382 | 17.480 | 17.906 | 12.201 | 16.820 |
| 5 | 0.8420 | 15.853 | 16.648 | 10.106 | 10.530 | 14.942 |
| 5 | 0.8430 | 13.047 | 14.848 | 10.524 | 16.298 | 11.232 |
| 5 | 0.8440 | 14.488 | 16.634 | 13.705 | 15.894 | 23.106 |
| 5 | 0.8450 | 10.609 | 13.091 | 10.825 | 10.646 | 9.788  |
| 5 | 0.8460 | 8.519  | 13.330 | 10.709 | 15.877 | 18.787 |
| 5 | 0.8470 | 8.537  | 13.352 | 10.761 | 15.878 | 18.824 |
| 5 | 0.8480 | 15.990 | 11.880 | 8.813  | 10.382 | 11.132 |
| 5 | 0.8490 | 14.260 | 13.391 | 7.868  | 9.808  | 9.482  |
| 5 | 0.8500 | 11.363 | 9.903  | 11.374 | 7.291  | 15.806 |
| 5 | 0.8510 | 11.470 | 7.126  | 6.929  | 7.712  | 9.141  |
| 5 | 0.8520 | 21.515 | 20.165 | 15.454 | 12.330 | 26.140 |
| 5 | 0.8530 | 8.899  | 12.465 | 9.616  | 9.321  | 18.440 |
| 5 | 0.8540 | 9.472  | 7.840  | 8.887  | 7.261  | 8.492  |
| 5 | 0.8550 | 17.425 | 16.424 | 14.797 | 14.982 | 23.614 |
| 5 | 0.8560 | 7.664  | 13.651 | 5.434  | 10.577 | 14.074 |
| 5 | 0.8570 | 14.742 | 15.805 | 9.318  | 10.449 | 18.972 |
| 5 | 0.8580 | 13.682 | 19.375 | 12.217 | 14.352 | 16.181 |
| 5 | 0.8590 | 7.311  | 10.258 | 6.108  | 9.067  | 8.305  |
| 5 | 0.8600 | 2.658  | 5.376  | 4.219  | 13.896 | 5.853  |
| 5 | 0.8610 | 8.635  | 11.900 | 16.839 | 13.617 | 21.084 |
| 5 | 0.8620 | 17.192 | 9.302  | 11.934 | 14.107 | 23.803 |
| 5 | 0.8630 | 11.104 | 9.425  | 8.742  | 19.349 | 14.764 |
| 5 | 0.8640 | 14.710 | 12.714 | 10.600 | 14.508 | 14.140 |
| 5 | 0.8650 | 13.750 | 13.183 | 10.412 | 12.368 | 9.354  |



|   |        |        |        |        |        |        |
|---|--------|--------|--------|--------|--------|--------|
| 5 | 0.8660 | 22.857 | 20.831 | 21.098 | 12.595 | 14.153 |
| 5 | 0.8670 | 21.573 | 15.581 | 17.104 | 13.988 | 23.018 |
| 5 | 0.8680 | 8.654  | 10.867 | 8.177  | 15.038 | 8.404  |
| 5 | 0.8690 | 4.990  | 8.543  | 6.343  | 24.043 | 13.954 |
| 5 | 0.8700 | 10.927 | 13.493 | 12.158 | 12.237 | 10.036 |
| 5 | 0.8710 | 12.837 | 17.738 | 18.639 | 13.453 | 15.137 |
| 5 | 0.8720 | 9.333  | 8.367  | 8.357  | 22.382 | 27.394 |
| 5 | 0.8730 | 4.133  | 4.885  | 4.828  | 14.116 | 14.958 |
| 5 | 0.8740 | 13.820 | 17.632 | 18.621 | 15.558 | 20.381 |
| 5 | 0.8750 | 11.088 | 11.666 | 14.920 | 13.620 | 8.096  |
| 5 | 0.8760 | 13.110 | 13.716 | 11.977 | 16.688 | 19.036 |
| 5 | 0.8770 | 9.947  | 14.512 | 12.335 | 15.690 | 9.030  |
| 5 | 0.8780 | 8.328  | 8.194  | 9.495  | 16.598 | 18.434 |
| 5 | 0.8790 | 8.325  | 8.862  | 6.647  | 17.416 | 12.892 |
| 5 | 0.8800 | 8.817  | 11.422 | 13.667 | 14.470 | 16.147 |
| 5 | 0.8810 | 19.054 | 21.114 | 21.268 | 18.504 | 16.908 |
| 5 | 0.8820 | 12.348 | 10.322 | 9.161  | 21.948 | 11.379 |
| 5 | 0.8830 | 10.339 | 10.705 | 9.688  | 9.231  | 10.017 |
| 5 | 0.8840 | 9.130  | 11.841 | 10.870 | 17.229 | 14.394 |
| 5 | 0.8850 | 8.601  | 9.579  | 11.870 | 21.579 | 21.847 |
| 5 | 0.8860 | 20.199 | 9.750  | 12.147 | 18.878 | 19.044 |
| 5 | 0.8870 | 16.016 | 12.176 | 12.013 | 11.451 | 12.417 |
| 5 | 0.8880 | 11.760 | 12.747 | 10.839 | 11.136 | 13.601 |
| 5 | 0.8890 | 20.292 | 11.867 | 13.321 | 6.660  | 17.718 |
| 5 | 0.8900 | 13.100 | 10.756 | 12.309 | 8.322  | 18.989 |
| 5 | 0.8910 | 20.138 | 21.087 | 22.975 | 14.132 | 30.149 |
| 5 | 0.8920 | 22.442 | 24.249 | 20.687 | 6.998  | 23.599 |
| 5 | 0.8930 | 10.851 | 16.662 | 9.941  | 13.460 | 21.004 |
| 5 | 0.8940 | 9.405  | 9.991  | 13.443 | 10.243 | 12.160 |
| 5 | 0.8950 | 21.714 | 16.381 | 16.186 | 9.237  | 12.506 |
| 5 | 0.8960 | 25.140 | 17.948 | 21.673 | 21.911 | 7.656  |
| 5 | 0.8970 | 7.155  | 12.728 | 8.971  | 14.558 | 10.295 |
| 5 | 0.8980 | 2.883  | 6.996  | 3.899  | 11.514 | 8.034  |
| 5 | 0.8990 | 6.589  | 8.196  | 3.215  | 7.302  | 5.043  |
| 5 | 0.9000 | 14.719 | 22.558 | 18.809 | 22.365 | 22.899 |
| 5 | 0.9010 | 11.562 | 16.700 | 12.952 | 13.979 | 17.743 |
| 5 | 0.9020 | 9.792  | 21.531 | 15.044 | 27.049 | 22.058 |
| 5 | 0.9030 | 13.676 | 14.342 | 11.399 | 14.531 | 14.641 |
| 5 | 0.9040 | 13.875 | 11.209 | 18.779 | 9.207  | 14.470 |
| 5 | 0.9050 | 10.784 | 14.762 | 16.012 | 13.017 | 22.400 |
| 5 | 0.9060 | 15.461 | 18.882 | 15.278 | 20.802 | 19.299 |
| 5 | 0.9070 | 21.535 | 25.437 | 16.242 | 20.058 | 27.144 |
| 5 | 0.9080 | 13.292 | 16.002 | 17.482 | 14.527 | 26.247 |
| 5 | 0.9090 | 17.496 | 18.156 | 13.205 | 18.499 | 19.397 |
| 5 | 0.9100 | 9.781  | 12.697 | 8.885  | 13.990 | 19.142 |
| 5 | 0.9110 | 11.080 | 10.258 | 9.164  | 9.048  | 11.342 |
| 5 | 0.9120 | 13.114 | 13.372 | 10.802 | 16.407 | 14.940 |
| 5 | 0.9130 | 9.904  | 20.935 | 14.691 | 18.529 | 18.487 |
| 5 | 0.9140 | 13.869 | 27.544 | 17.510 | 27.225 | 19.704 |
| 5 | 0.9150 | 14.265 | 25.994 | 18.218 | 15.554 | 26.675 |

|   |        |        |        |        |        |        |
|---|--------|--------|--------|--------|--------|--------|
| 5 | 0.9160 | 15.010 | 16.930 | 13.608 | 11.621 | 15.944 |
| 5 | 0.9170 | 8.856  | 17.245 | 15.737 | 8.707  | 22.095 |
| 5 | 0.9180 | 12.361 | 13.852 | 14.029 | 9.346  | 20.676 |
| 5 | 0.9190 | 12.595 | 16.711 | 15.046 | 13.380 | 21.453 |
| 5 | 0.9200 | 10.184 | 18.123 | 16.006 | 24.183 | 13.645 |
| 5 | 0.9210 | 12.227 | 13.949 | 17.532 | 9.506  | 14.130 |
| 5 | 0.9220 | 9.711  | 7.828  | 11.195 | 9.452  | 15.868 |
| 5 | 0.9230 | 12.462 | 16.121 | 16.391 | 11.569 | 16.885 |
| 5 | 0.9240 | 13.112 | 19.875 | 18.214 | 22.384 | 19.023 |
| 5 | 0.9250 | 17.125 | 20.986 | 13.958 | 17.537 | 20.649 |
| 5 | 0.9260 | 19.387 | 17.803 | 19.186 | 16.621 | 14.457 |
| 5 | 0.9270 | 27.978 | 17.249 | 16.430 | 15.657 | 24.751 |
| 5 | 0.9280 | 14.577 | 20.572 | 22.532 | 15.350 | 20.989 |
| 5 | 0.9290 | 4.219  | 8.121  | 9.503  | 13.790 | 16.778 |
| 5 | 0.9300 | 16.811 | 10.077 | 14.829 | 11.734 | 17.543 |
| 5 | 0.9310 | 17.909 | 17.100 | 21.017 | 18.203 | 18.820 |
| 5 | 0.9320 | 16.444 | 13.583 | 14.488 | 12.197 | 8.093  |
| 5 | 0.9330 | 23.926 | 14.641 | 16.982 | 10.136 | 7.505  |
| 5 | 0.9340 | 9.456  | 14.413 | 11.846 | 14.310 | 10.556 |
| 5 | 0.9350 | 11.440 | 10.477 | 11.728 | 11.591 | 25.195 |
| 5 | 0.9360 | 15.151 | 18.481 | 16.496 | 25.009 | 21.270 |
| 5 | 0.9370 | 10.007 | 18.203 | 10.486 | 20.513 | 10.318 |
| 5 | 0.9380 | 10.012 | 18.222 | 10.483 | 20.514 | 10.299 |
| 5 | 0.9390 | 10.017 | 18.240 | 10.481 | 20.515 | 10.279 |
| 5 | 0.9400 | 10.022 | 18.258 | 10.478 | 20.514 | 10.258 |
| 5 | 0.9410 | 15.767 | 21.556 | 16.111 | 16.244 | 13.143 |
| 5 | 0.9420 | 16.498 | 18.761 | 17.228 | 10.616 | 14.909 |
| 5 | 0.9430 | 16.470 | 18.493 | 18.924 | 23.398 | 15.119 |
| 5 | 0.9440 | 12.723 | 19.228 | 17.115 | 23.689 | 22.884 |
| 5 | 0.9450 | 9.726  | 15.834 | 12.779 | 20.435 | 15.220 |
| 5 | 0.9460 | 16.400 | 22.908 | 15.314 | 20.639 | 19.850 |
| 5 | 0.9470 | 11.140 | 6.581  | 12.605 | 9.278  | 10.631 |
| 5 | 0.9480 | 10.737 | 6.707  | 3.072  | 4.799  | 16.227 |
| 5 | 0.9490 | 13.007 | 9.482  | 3.233  | 11.095 | 19.535 |
| 5 | 0.9500 | 5.702  | 12.571 | 4.967  | 14.428 | 16.024 |
| 5 | 0.9510 | 8.202  | 20.071 | 12.599 | 22.429 | 8.459  |
| 5 | 0.9520 | 13.165 | 14.067 | 17.972 | 21.288 | 15.710 |
| 5 | 0.9530 | 20.686 | 27.623 | 26.662 | 11.023 | 20.937 |
| 5 | 0.9540 | 20.616 | 24.433 | 24.606 | 25.290 | 16.886 |
| 5 | 0.9550 | 11.844 | 18.120 | 14.638 | 21.157 | 10.213 |
| 5 | 0.9560 | 15.380 | 21.241 | 14.170 | 26.382 | 15.195 |
| 5 | 0.9570 | 7.327  | 9.983  | 6.091  | 25.120 | 10.781 |
| 5 | 0.9580 | 18.718 | 18.328 | 22.803 | 20.760 | 12.286 |
| 5 | 0.9590 | 11.373 | 15.335 | 10.957 | 29.695 | 13.748 |
| 5 | 0.9600 | 12.793 | 19.606 | 10.345 | 26.734 | 16.132 |
| 5 | 0.9610 | 9.677  | 28.355 | 13.750 | 37.608 | 17.782 |
| 5 | 0.9620 | 4.496  | 11.542 | 8.536  | 24.061 | 11.189 |
| 5 | 0.9630 | 5.614  | 5.172  | 6.478  | 11.227 | 11.712 |
| 5 | 0.9640 | 7.285  | 19.895 | 15.960 | 18.948 | 12.378 |
| 5 | 0.9650 | 10.867 | 16.957 | 19.469 | 11.840 | 18.339 |

|   |        |        |        |        |        |        |
|---|--------|--------|--------|--------|--------|--------|
| 5 | 0.9660 | 9.053  | 10.241 | 11.896 | 4.667  | 18.702 |
| 5 | 0.9670 | 9.149  | 10.328 | 12.030 | 4.790  | 18.830 |
| 5 | 0.9680 | 8.930  | 17.332 | 16.132 | 19.045 | 17.924 |
| 5 | 0.9690 | 7.204  | 14.562 | 13.225 | 15.371 | 13.496 |
| 5 | 0.9700 | 5.380  | 5.619  | 8.633  | 7.530  | 10.015 |
| 5 | 0.9710 | 11.148 | 12.292 | 11.501 | 9.082  | 18.940 |
| 5 | 0.9720 | 15.781 | 18.735 | 14.572 | 10.456 | 5.440  |
| 5 | 0.9730 | 7.308  | 10.017 | 10.658 | 14.259 | 7.594  |
| 5 | 0.9740 | 14.386 | 24.835 | 21.082 | 19.057 | 16.494 |
| 5 | 0.9750 | 7.435  | 8.369  | 6.152  | 19.323 | 8.224  |
| 5 | 0.9760 | 8.467  | 11.911 | 8.763  | 21.823 | 8.614  |
| 5 | 0.9770 | 10.848 | 15.076 | 13.855 | 20.661 | 12.938 |
| 5 | 0.9780 | 7.694  | 18.725 | 10.773 | 25.933 | 14.665 |
| 5 | 0.9790 | 3.093  | 9.700  | 4.926  | 12.444 | 2.799  |
| 5 | 0.9800 | 3.124  | 11.401 | 3.862  | 14.890 | 4.747  |
| 5 | 0.9810 | 15.300 | 22.823 | 16.138 | 20.681 | 12.269 |
| 5 | 0.9820 | 11.389 | 18.512 | 18.387 | 16.679 | 11.785 |
| 5 | 0.9830 | 11.930 | 7.655  | 14.549 | 11.402 | 14.574 |
| 5 | 0.9840 | 7.530  | 6.644  | 10.734 | 12.111 | 10.296 |
| 5 | 0.9850 | 7.708  | 11.688 | 7.987  | 15.022 | 8.987  |
| 5 | 0.9860 | 6.096  | 11.714 | 6.277  | 20.216 | 13.567 |
| 5 | 0.9870 | 4.610  | 3.472  | 5.385  | 9.174  | 5.982  |
| 5 | 0.9880 | 4.321  | 2.098  | 4.264  | 8.255  | 10.468 |
| 5 | 0.9890 | 7.597  | 4.306  | 6.220  | 7.791  | 8.529  |
| 5 | 0.9900 | 8.776  | 8.119  | 8.123  | 11.667 | 12.073 |
| 5 | 0.9910 | 12.720 | 11.982 | 8.579  | 14.884 | 12.784 |
| 5 | 0.9920 | 8.623  | 12.381 | 7.994  | 13.460 | 6.185  |
| 5 | 0.9930 | 11.711 | 5.459  | 11.606 | 12.598 | 11.601 |
| 5 | 0.9940 | 7.862  | 14.351 | 11.459 | 23.436 | 11.190 |
| 5 | 0.9950 | 9.138  | 16.241 | 11.052 | 24.256 | 10.918 |
| 5 | 0.9960 | 15.878 | 19.033 | 15.771 | 22.118 | 12.757 |
| 5 | 0.9970 | 6.739  | 11.197 | 7.073  | 12.246 | 11.933 |
| 5 | 0.9980 | 13.234 | 18.378 | 14.024 | 17.003 | 9.542  |
| 5 | 0.9990 | 10.639 | 11.603 | 15.144 | 17.935 | 9.867  |
| 5 | 1.0000 | 8.681  | 8.876  | 11.084 | 14.230 | 13.830 |
| 5 | 1.0010 | 7.100  | 11.832 | 8.248  | 23.149 | 9.258  |
| 5 | 1.0020 | 5.149  | 7.871  | 6.322  | 10.400 | 11.069 |
| 5 | 1.0030 | 5.171  | 12.730 | 5.615  | 19.864 | 12.219 |
| 5 | 1.0040 | 8.244  | 5.921  | 10.772 | 16.999 | 7.815  |
| 5 | 1.0050 | 12.196 | 14.266 | 10.576 | 32.982 | 17.963 |
| 5 | 1.0060 | 14.047 | 23.868 | 17.785 | 17.395 | 7.660  |
| 5 | 1.0070 | 8.609  | 11.896 | 11.805 | 12.804 | 7.781  |
| 5 | 1.0080 | 2.986  | 4.306  | 9.146  | 10.625 | 12.103 |
| 5 | 1.0090 | 7.052  | 7.862  | 9.442  | 10.358 | 17.648 |
| 5 | 1.0100 | 13.805 | 18.266 | 15.638 | 14.037 | 19.971 |
| 5 | 1.0110 | 21.855 | 21.797 | 20.147 | 15.742 | 16.058 |
| 5 | 1.0120 | 24.768 | 20.992 | 18.480 | 9.711  | 18.892 |
| 5 | 1.0130 | 16.334 | 21.188 | 15.569 | 14.948 | 11.001 |
| 5 | 1.0140 | 9.877  | 8.802  | 11.197 | 12.409 | 18.438 |
| 5 | 1.0150 | 6.101  | 7.670  | 5.726  | 12.901 | 15.334 |

|   |        |        |        |        |        |        |
|---|--------|--------|--------|--------|--------|--------|
| 5 | 1.0160 | 6.419  | 4.822  | 7.330  | 9.440  | 13.478 |
| 5 | 1.0170 | 15.353 | 16.995 | 17.033 | 20.560 | 16.714 |
| 5 | 1.0180 | 15.623 | 13.679 | 11.940 | 18.614 | 13.730 |
| 5 | 1.0190 | 10.765 | 13.423 | 9.694  | 12.313 | 17.555 |
| 5 | 1.0200 | 4.411  | 5.033  | 3.301  | 14.632 | 6.387  |
| 5 | 1.0210 | 8.660  | 12.826 | 11.353 | 15.122 | 17.408 |
| 5 | 1.0220 | 11.232 | 13.401 | 13.317 | 9.099  | 29.772 |
| 5 | 1.0230 | 11.609 | 11.310 | 12.187 | 12.635 | 18.812 |
| 5 | 1.0240 | 16.014 | 15.559 | 19.151 | 10.578 | 12.519 |
| 5 | 1.0250 | 7.991  | 4.243  | 6.910  | 7.204  | 18.520 |
| 5 | 1.0260 | 5.895  | 4.366  | 6.440  | 3.872  | 19.046 |
| 5 | 1.0270 | 1.682  | 2.651  | 3.019  | 3.945  | 14.656 |
| 5 | 1.0280 | 6.071  | 6.443  | 5.384  | 4.426  | 13.204 |
| 5 | 1.0290 | 13.192 | 9.297  | 12.743 | 8.673  | 7.829  |
| 5 | 1.0300 | 9.774  | 8.627  | 12.241 | 14.774 | 9.227  |
| 5 | 1.0310 | 8.563  | 9.490  | 12.071 | 15.708 | 8.238  |
| 5 | 1.0320 | 6.018  | 7.295  | 6.802  | 9.769  | 8.750  |
| 5 | 1.0330 | 2.380  | 6.481  | 7.578  | 10.463 | 16.093 |
| 5 | 1.0340 | 8.259  | 4.550  | 7.110  | 6.624  | 22.279 |
| 5 | 1.0350 | 9.136  | 9.901  | 11.137 | 11.369 | 11.745 |
| 5 | 1.0360 | 16.525 | 14.618 | 17.513 | 8.941  | 19.304 |
| 5 | 1.0370 | 16.492 | 14.498 | 17.750 | 9.017  | 19.026 |
| 5 | 1.0380 | 8.303  | 9.938  | 9.629  | 12.622 | 16.259 |
| 5 | 1.0390 | 10.803 | 11.094 | 10.397 | 11.756 | 17.939 |
| 5 | 1.0400 | 8.720  | 9.921  | 9.677  | 18.178 | 12.068 |
| 5 | 1.0410 | 9.535  | 12.048 | 9.375  | 9.652  | 9.837  |
| 5 | 1.0420 | 7.114  | 4.701  | 5.016  | 6.010  | 5.256  |
| 5 | 1.0430 | 9.656  | 8.913  | 10.461 | 10.044 | 4.738  |
| 5 | 1.0440 | 8.122  | 6.537  | 8.014  | 15.296 | 12.768 |
| 5 | 1.0450 | 17.039 | 16.349 | 17.965 | 10.407 | 10.818 |
| 5 | 1.0460 | 9.388  | 15.326 | 13.155 | 16.332 | 9.194  |
| 5 | 1.0470 | 8.385  | 13.444 | 13.972 | 14.831 | 10.947 |
| 5 | 1.0480 | 11.333 | 11.230 | 8.726  | 6.022  | 19.373 |
| 5 | 1.0490 | 5.697  | 7.409  | 4.793  | 3.313  | 3.648  |
| 5 | 1.0500 | 5.636  | 9.129  | 5.703  | 10.975 | 6.913  |
| 5 | 1.0510 | 12.028 | 14.327 | 15.681 | 7.669  | 15.580 |
| 5 | 1.0520 | 23.449 | 17.911 | 19.005 | 18.764 | 18.963 |
| 5 | 1.0530 | 17.367 | 13.554 | 13.800 | 7.049  | 15.319 |
| 5 | 1.0540 | 11.665 | 9.578  | 14.066 | 9.110  | 22.477 |
| 5 | 1.0550 | 11.645 | 9.438  | 13.978 | 9.527  | 22.574 |
| 5 | 1.0560 | 14.191 | 11.263 | 15.782 | 11.172 | 23.578 |
| 5 | 1.0570 | 7.355  | 8.060  | 6.483  | 5.461  | 7.629  |
| 5 | 1.0580 | 12.644 | 14.147 | 18.671 | 18.830 | 22.688 |
| 5 | 1.0590 | 14.100 | 9.342  | 13.155 | 19.185 | 17.546 |
| 5 | 1.0600 | 23.731 | 14.736 | 20.709 | 15.773 | 14.455 |
| 5 | 1.0610 | 20.251 | 18.672 | 22.045 | 13.111 | 23.153 |
| 5 | 1.0620 | 13.051 | 9.289  | 12.368 | 7.836  | 17.553 |
| 5 | 1.0630 | 15.817 | 18.293 | 15.881 | 10.777 | 10.713 |
| 5 | 1.0640 | 16.174 | 17.560 | 14.026 | 14.016 | 11.254 |
| 5 | 1.0650 | 18.145 | 16.919 | 15.800 | 10.352 | 14.954 |

|   |        |        |        |        |        |        |
|---|--------|--------|--------|--------|--------|--------|
| 5 | 1.0660 | 17.349 | 16.562 | 18.040 | 13.492 | 17.482 |
| 5 | 1.0670 | 14.001 | 16.405 | 18.743 | 11.113 | 17.523 |
| 5 | 1.0680 | 17.854 | 19.328 | 23.510 | 11.160 | 10.421 |
| 5 | 1.0690 | 14.118 | 6.576  | 6.937  | 15.733 | 14.850 |
| 5 | 1.0700 | 13.062 | 16.290 | 14.311 | 17.271 | 8.610  |
| 5 | 1.0710 | 9.884  | 9.092  | 8.181  | 9.554  | 22.458 |
| 5 | 1.0720 | 6.117  | 11.861 | 9.762  | 12.816 | 9.118  |
| 5 | 1.0730 | 6.267  | 6.250  | 8.617  | 6.747  | 13.524 |
| 5 | 1.0740 | 4.902  | 7.968  | 7.237  | 1.804  | 2.693  |
| 5 | 1.0750 | 8.466  | 8.912  | 9.104  | 4.430  | 7.710  |
| 5 | 1.0760 | 14.617 | 12.078 | 14.266 | 4.710  | 7.700  |
| 5 | 1.0770 | 11.127 | 8.941  | 9.882  | 6.512  | 7.877  |
| 5 | 1.0780 | 26.146 | 13.743 | 24.859 | 11.882 | 13.643 |
| 5 | 1.0790 | 25.959 | 13.417 | 24.635 | 11.877 | 13.533 |
| 5 | 1.0800 | 22.947 | 15.798 | 19.242 | 18.932 | 30.659 |
| 5 | 1.0810 | 22.193 | 13.145 | 21.333 | 20.669 | 10.387 |
| 5 | 1.0820 | 32.645 | 35.488 | 27.410 | 17.131 | 7.520  |
| 5 | 1.0830 | 15.466 | 19.976 | 14.477 | 10.557 | 9.760  |
| 5 | 1.0840 | 17.577 | 26.802 | 16.594 | 11.281 | 14.270 |
| 5 | 1.0850 | 21.084 | 24.786 | 17.386 | 12.504 | 17.715 |
| 5 | 1.0860 | 26.271 | 20.207 | 22.511 | 14.008 | 15.154 |
| 5 | 1.0870 | 19.668 | 24.021 | 17.770 | 9.603  | 11.638 |
| 5 | 1.0880 | 17.326 | 21.291 | 15.413 | 10.287 | 12.645 |
| 5 | 1.0890 | 10.944 | 20.683 | 12.603 | 18.040 | 10.664 |
| 5 | 1.0900 | 10.072 | 10.883 | 10.254 | 4.290  | 9.671  |
| 5 | 1.0910 | 20.334 | 16.001 | 18.537 | 21.268 | 11.440 |
| 5 | 1.0920 | 16.138 | 16.413 | 12.264 | 10.089 | 5.655  |
| 5 | 1.0930 | 16.887 | 31.476 | 20.446 | 21.332 | 5.922  |
| 5 | 1.0940 | 13.113 | 21.419 | 12.179 | 18.620 | 7.035  |
| 5 | 1.0950 | 12.669 | 10.725 | 10.201 | 7.852  | 12.333 |
| 5 | 1.0960 | 14.678 | 13.728 | 13.169 | 13.750 | 5.491  |
| 5 | 1.0970 | 11.189 | 8.992  | 9.862  | 14.173 | 21.583 |
| 5 | 1.0980 | 10.252 | 9.342  | 8.566  | 16.736 | 13.701 |
| 5 | 1.0990 | 11.757 | 11.243 | 11.258 | 9.800  | 6.835  |
| 5 | 1.1000 | 7.991  | 8.277  | 4.630  | 8.892  | 11.563 |
| 5 | 1.1010 | 8.612  | 16.239 | 9.100  | 21.046 | 7.158  |
| 5 | 1.1020 | 15.668 | 13.718 | 10.281 | 6.110  | 8.023  |
| 5 | 1.1030 | 8.127  | 12.975 | 7.736  | 16.246 | 6.731  |
| 5 | 1.1040 | 7.242  | 8.698  | 6.158  | 12.359 | 5.459  |
| 5 | 1.1050 | 10.889 | 15.272 | 12.434 | 8.126  | 4.628  |
| 5 | 1.1060 | 9.156  | 8.979  | 8.579  | 10.132 | 11.979 |
| 5 | 1.1070 | 6.094  | 6.229  | 6.147  | 11.533 | 11.539 |
| 5 | 1.1080 | 11.259 | 10.583 | 10.268 | 6.779  | 10.711 |
| 5 | 1.1090 | 11.303 | 5.745  | 9.061  | 7.949  | 5.905  |
| 5 | 1.1100 | 0.000  | 0.000  | 0.000  | 0.000  | 0.000  |
| 6 | 0.0003 | 0.000  | 0.000  | 0.000  | 0.000  | 0.000  |
| 6 | 0.0013 | 11.226 | 9.496  | 12.940 | 10.276 | 19.061 |
| 6 | 0.0023 | 7.374  | 12.766 | 7.941  | 8.559  | 13.572 |
| 6 | 0.0033 | 8.011  | 11.396 | 10.938 | 2.722  | 17.576 |
| 6 | 0.0043 | 8.204  | 15.068 | 14.149 | 11.464 | 18.094 |

|   |        |        |        |        |        |        |
|---|--------|--------|--------|--------|--------|--------|
| 6 | 0.0053 | 5.338  | 6.638  | 7.980  | 6.517  | 11.793 |
| 6 | 0.0063 | 13.261 | 12.852 | 16.245 | 13.909 | 12.681 |
| 6 | 0.0073 | 27.679 | 17.370 | 13.940 | 24.265 | 9.985  |
| 6 | 0.0083 | 18.562 | 14.540 | 13.213 | 17.714 | 15.019 |
| 6 | 0.0093 | 11.813 | 13.414 | 8.342  | 11.557 | 8.642  |
| 6 | 0.0103 | 12.275 | 21.179 | 16.044 | 10.768 | 7.229  |
| 6 | 0.0113 | 24.633 | 15.522 | 19.314 | 18.040 | 19.458 |
| 6 | 0.0123 | 27.853 | 17.297 | 22.291 | 14.229 | 30.134 |
| 6 | 0.0133 | 8.385  | 9.257  | 11.530 | 14.644 | 14.332 |
| 6 | 0.0143 | 15.807 | 7.998  | 9.671  | 14.422 | 22.022 |
| 6 | 0.0153 | 15.697 | 9.637  | 11.096 | 14.897 | 13.776 |
| 6 | 0.0163 | 18.356 | 14.102 | 12.644 | 22.257 | 15.949 |
| 6 | 0.0173 | 23.003 | 11.486 | 9.954  | 18.969 | 17.876 |
| 6 | 0.0183 | 2.541  | 5.371  | 2.058  | 15.247 | 16.786 |
| 6 | 0.0193 | 13.701 | 14.770 | 11.017 | 16.071 | 25.776 |
| 6 | 0.0203 | 15.219 | 18.410 | 10.616 | 17.867 | 22.721 |
| 6 | 0.0213 | 11.801 | 16.049 | 10.423 | 19.333 | 12.200 |
| 6 | 0.0223 | 7.912  | 4.395  | 5.095  | 6.061  | 9.119  |
| 6 | 0.0233 | 20.728 | 8.257  | 8.060  | 15.858 | 15.021 |
| 6 | 0.0243 | 6.329  | 7.619  | 4.570  | 11.043 | 13.979 |
| 6 | 0.0253 | 21.009 | 23.346 | 16.667 | 12.588 | 19.715 |
| 6 | 0.0263 | 21.982 | 22.098 | 17.913 | 19.111 | 22.315 |
| 6 | 0.0273 | 5.896  | 10.126 | 6.704  | 23.152 | 34.168 |
| 6 | 0.0283 | 7.362  | 15.748 | 7.076  | 25.234 | 28.781 |
| 6 | 0.0293 | 17.673 | 24.896 | 15.861 | 22.184 | 35.539 |
| 6 | 0.0303 | 29.275 | 33.198 | 21.697 | 24.480 | 20.557 |
| 6 | 0.0313 | 15.227 | 12.590 | 13.360 | 19.767 | 11.067 |
| 6 | 0.0323 | 13.445 | 9.786  | 12.625 | 19.169 | 20.222 |
| 6 | 0.0333 | 6.740  | 11.637 | 10.299 | 17.392 | 9.422  |
| 6 | 0.0343 | 12.291 | 10.842 | 10.824 | 25.882 | 15.252 |
| 6 | 0.0353 | 10.279 | 10.836 | 11.119 | 14.063 | 16.135 |
| 6 | 0.0363 | 12.202 | 20.349 | 11.252 | 23.972 | 18.099 |
| 6 | 0.0373 | 20.963 | 16.294 | 16.602 | 11.801 | 8.037  |
| 6 | 0.0383 | 10.946 | 11.682 | 14.522 | 18.138 | 10.647 |
| 6 | 0.0393 | 14.474 | 14.687 | 13.556 | 21.181 | 18.260 |
| 6 | 0.0403 | 17.486 | 14.681 | 12.381 | 16.358 | 16.660 |
| 6 | 0.0413 | 18.235 | 19.498 | 13.010 | 39.508 | 18.798 |
| 6 | 0.0423 | 12.235 | 11.614 | 7.101  | 31.445 | 25.639 |
| 6 | 0.0433 | 14.061 | 19.225 | 11.112 | 37.425 | 25.901 |
| 6 | 0.0443 | 14.252 | 19.391 | 12.224 | 38.206 | 24.583 |
| 6 | 0.0453 | 12.113 | 17.828 | 19.668 | 32.364 | 22.922 |
| 6 | 0.0463 | 8.350  | 19.116 | 15.373 | 22.594 | 15.798 |
| 6 | 0.0473 | 14.115 | 16.421 | 20.089 | 19.646 | 23.067 |
| 6 | 0.0483 | 10.066 | 15.579 | 14.756 | 16.904 | 26.751 |
| 6 | 0.0493 | 10.784 | 11.771 | 13.292 | 12.299 | 24.140 |
| 6 | 0.0503 | 10.849 | 11.824 | 13.364 | 12.308 | 24.447 |
| 6 | 0.0513 | 8.733  | 11.369 | 12.109 | 18.235 | 24.176 |
| 6 | 0.0523 | 8.125  | 11.689 | 13.724 | 15.610 | 28.342 |
| 6 | 0.0533 | 14.462 | 13.563 | 19.190 | 14.159 | 36.486 |
| 6 | 0.0543 | 11.838 | 12.969 | 16.052 | 9.305  | 26.292 |

|   |        |        |        |        |        |        |
|---|--------|--------|--------|--------|--------|--------|
| 6 | 0.0553 | 15.965 | 17.109 | 14.856 | 11.420 | 15.855 |
| 6 | 0.0563 | 12.945 | 17.546 | 14.204 | 16.507 | 21.822 |
| 6 | 0.0573 | 20.505 | 20.762 | 23.372 | 26.283 | 27.524 |
| 6 | 0.0583 | 20.676 | 18.634 | 16.527 | 22.727 | 37.158 |
| 6 | 0.0593 | 20.919 | 18.328 | 18.292 | 16.416 | 32.538 |
| 6 | 0.0603 | 9.664  | 12.023 | 8.584  | 13.290 | 25.016 |
| 6 | 0.0613 | 12.323 | 10.706 | 6.326  | 18.078 | 25.244 |
| 6 | 0.0623 | 16.017 | 21.592 | 13.094 | 26.157 | 27.647 |
| 6 | 0.0633 | 22.450 | 27.043 | 20.376 | 21.445 | 34.173 |
| 6 | 0.0643 | 11.808 | 16.067 | 14.184 | 25.756 | 33.071 |
| 6 | 0.0653 | 9.395  | 13.334 | 10.972 | 21.068 | 22.426 |
| 6 | 0.0663 | 19.026 | 15.698 | 25.349 | 17.702 | 25.720 |
| 6 | 0.0673 | 29.561 | 22.907 | 24.261 | 27.509 | 43.342 |
| 6 | 0.0683 | 37.345 | 30.621 | 32.828 | 28.493 | 28.725 |
| 6 | 0.0693 | 16.725 | 16.436 | 11.766 | 20.785 | 32.027 |
| 6 | 0.0703 | 19.307 | 30.023 | 24.944 | 27.539 | 18.519 |
| 6 | 0.0713 | 20.109 | 21.324 | 20.853 | 27.730 | 22.882 |
| 6 | 0.0723 | 16.222 | 18.775 | 21.190 | 25.181 | 13.608 |
| 6 | 0.0733 | 24.672 | 30.321 | 22.423 | 25.931 | 23.158 |
| 6 | 0.0743 | 25.455 | 30.342 | 22.508 | 25.892 | 24.713 |
| 6 | 0.0753 | 25.356 | 28.097 | 19.879 | 17.836 | 17.938 |
| 6 | 0.0763 | 21.951 | 25.577 | 19.050 | 11.853 | 17.701 |
| 6 | 0.0773 | 14.756 | 13.986 | 13.725 | 9.970  | 12.901 |
| 6 | 0.0783 | 14.259 | 17.679 | 11.199 | 19.212 | 30.371 |
| 6 | 0.0793 | 13.961 | 19.839 | 16.003 | 15.057 | 15.934 |
| 6 | 0.0803 | 14.362 | 13.856 | 12.459 | 18.228 | 13.999 |
| 6 | 0.0813 | 31.779 | 41.012 | 28.742 | 30.504 | 35.027 |
| 6 | 0.0823 | 15.346 | 28.791 | 18.181 | 36.089 | 39.190 |
| 6 | 0.0833 | 15.446 | 28.835 | 18.307 | 36.256 | 39.676 |
| 6 | 0.0843 | 18.758 | 19.608 | 17.199 | 23.387 | 30.946 |
| 6 | 0.0853 | 12.033 | 17.781 | 18.845 | 28.897 | 27.287 |
| 6 | 0.0863 | 19.325 | 36.364 | 24.270 | 32.594 | 25.527 |
| 6 | 0.0873 | 18.139 | 32.277 | 20.008 | 26.330 | 43.695 |
| 6 | 0.0883 | 9.121  | 18.943 | 14.478 | 27.731 | 30.514 |
| 6 | 0.0893 | 21.336 | 17.567 | 19.457 | 19.427 | 30.337 |
| 6 | 0.0903 | 23.860 | 22.898 | 23.097 | 20.033 | 34.917 |
| 6 | 0.0913 | 21.069 | 26.087 | 23.686 | 21.037 | 32.417 |
| 6 | 0.0923 | 16.533 | 14.187 | 17.375 | 22.686 | 27.727 |
| 6 | 0.0933 | 17.651 | 20.067 | 17.137 | 17.701 | 37.534 |
| 6 | 0.0943 | 9.033  | 9.980  | 9.272  | 22.148 | 32.262 |
| 6 | 0.0953 | 23.426 | 15.445 | 14.954 | 14.840 | 32.175 |
| 6 | 0.0963 | 20.697 | 17.170 | 19.022 | 15.783 | 26.168 |
| 6 | 0.0973 | 15.162 | 19.149 | 15.724 | 25.159 | 22.625 |
| 6 | 0.0983 | 23.517 | 22.168 | 20.152 | 18.539 | 10.511 |
| 6 | 0.0993 | 8.706  | 4.208  | 9.006  | 2.004  | 16.726 |
| 6 | 0.1003 | 24.767 | 14.520 | 16.908 | 22.405 | 15.584 |
| 6 | 0.1013 | 22.976 | 22.080 | 22.344 | 14.793 | 42.681 |
| 6 | 0.1023 | 19.219 | 20.646 | 19.029 | 24.180 | 40.608 |
| 6 | 0.1033 | 21.827 | 20.419 | 18.447 | 23.660 | 30.065 |
| 6 | 0.1043 | 18.271 | 17.239 | 18.699 | 34.057 | 37.378 |

|   |        |        |        |        |        |        |
|---|--------|--------|--------|--------|--------|--------|
| 6 | 0.1053 | 23.032 | 19.471 | 14.636 | 26.871 | 25.873 |
| 6 | 0.1063 | 26.955 | 13.621 | 16.942 | 25.084 | 19.300 |
| 6 | 0.1073 | 16.074 | 12.589 | 13.481 | 24.802 | 26.080 |
| 6 | 0.1083 | 22.725 | 17.323 | 21.917 | 24.346 | 27.707 |
| 6 | 0.1093 | 20.723 | 18.039 | 17.221 | 28.647 | 26.503 |
| 6 | 0.1103 | 17.023 | 11.511 | 16.263 | 25.312 | 19.941 |
| 6 | 0.1113 | 13.183 | 7.750  | 11.004 | 24.688 | 18.878 |
| 6 | 0.1123 | 16.304 | 9.043  | 7.446  | 16.616 | 16.697 |
| 6 | 0.1133 | 17.460 | 11.777 | 13.599 | 26.074 | 21.034 |
| 6 | 0.1143 | 7.317  | 8.456  | 7.744  | 17.596 | 16.681 |
| 6 | 0.1153 | 19.549 | 12.120 | 11.475 | 18.507 | 29.760 |
| 6 | 0.1163 | 18.734 | 11.565 | 13.610 | 34.647 | 29.079 |
| 6 | 0.1173 | 14.404 | 11.260 | 11.827 | 30.180 | 17.177 |
| 6 | 0.1183 | 15.820 | 9.819  | 13.844 | 28.673 | 14.817 |
| 6 | 0.1193 | 18.574 | 8.860  | 19.651 | 7.687  | 26.388 |
| 6 | 0.1203 | 13.417 | 12.700 | 11.508 | 16.048 | 28.606 |
| 6 | 0.1213 | 24.998 | 15.017 | 16.738 | 22.211 | 18.010 |
| 6 | 0.1223 | 11.503 | 10.665 | 11.090 | 21.966 | 13.708 |
| 6 | 0.1233 | 14.949 | 16.340 | 17.909 | 32.013 | 24.395 |
| 6 | 0.1243 | 14.203 | 16.285 | 16.214 | 43.589 | 28.695 |
| 6 | 0.1253 | 16.638 | 9.669  | 20.607 | 23.058 | 23.490 |
| 6 | 0.1263 | 22.849 | 15.154 | 23.222 | 19.268 | 28.185 |
| 6 | 0.1273 | 15.143 | 7.584  | 7.098  | 26.313 | 51.663 |
| 6 | 0.1283 | 17.131 | 7.379  | 16.432 | 32.923 | 49.198 |
| 6 | 0.1293 | 8.837  | 9.468  | 9.245  | 26.828 | 31.490 |
| 6 | 0.1303 | 10.015 | 11.472 | 9.851  | 22.550 | 26.026 |
| 6 | 0.1313 | 20.971 | 17.749 | 20.211 | 32.182 | 29.570 |
| 6 | 0.1323 | 16.211 | 9.563  | 12.946 | 24.228 | 12.021 |
| 6 | 0.1333 | 20.107 | 13.947 | 21.331 | 16.415 | 9.069  |
| 6 | 0.1343 | 26.259 | 16.701 | 21.249 | 21.477 | 18.414 |
| 6 | 0.1353 | 8.866  | 11.402 | 12.249 | 32.614 | 20.107 |
| 6 | 0.1363 | 20.160 | 14.280 | 18.523 | 19.042 | 29.926 |
| 6 | 0.1373 | 18.761 | 18.223 | 11.316 | 38.926 | 28.746 |
| 6 | 0.1383 | 11.611 | 11.322 | 8.358  | 21.000 | 28.278 |
| 6 | 0.1393 | 11.280 | 13.381 | 14.080 | 16.595 | 12.849 |
| 6 | 0.1403 | 17.247 | 10.545 | 18.101 | 36.859 | 22.569 |
| 6 | 0.1413 | 6.956  | 8.616  | 9.614  | 24.956 | 24.303 |
| 6 | 0.1423 | 23.686 | 23.131 | 21.767 | 21.444 | 20.446 |
| 6 | 0.1433 | 12.558 | 11.077 | 8.993  | 26.514 | 19.849 |
| 6 | 0.1443 | 16.299 | 17.965 | 17.359 | 25.493 | 26.262 |
| 6 | 0.1453 | 14.428 | 16.363 | 18.176 | 18.840 | 22.092 |
| 6 | 0.1463 | 24.869 | 14.581 | 12.231 | 15.591 | 27.105 |
| 6 | 0.1473 | 32.889 | 23.068 | 19.797 | 20.604 | 33.156 |
| 6 | 0.1483 | 19.443 | 18.075 | 19.649 | 21.131 | 25.658 |
| 6 | 0.1493 | 16.994 | 15.768 | 18.181 | 12.171 | 11.844 |
| 6 | 0.1503 | 11.470 | 8.475  | 12.733 | 28.253 | 18.559 |
| 6 | 0.1513 | 23.259 | 17.159 | 19.551 | 34.399 | 28.745 |
| 6 | 0.1523 | 24.082 | 17.542 | 16.673 | 22.492 | 31.598 |
| 6 | 0.1533 | 17.721 | 23.402 | 17.876 | 24.746 | 31.146 |
| 6 | 0.1543 | 12.778 | 16.113 | 9.635  | 28.270 | 26.455 |



|   |        |        |        |        |        |        |
|---|--------|--------|--------|--------|--------|--------|
| 6 | 0.1553 | 34.434 | 35.562 | 29.205 | 24.317 | 24.230 |
| 6 | 0.1563 | 29.941 | 31.016 | 27.877 | 44.462 | 41.090 |
| 6 | 0.1573 | 13.137 | 12.204 | 15.583 | 25.927 | 25.581 |
| 6 | 0.1583 | 21.170 | 22.822 | 21.782 | 22.983 | 21.133 |
| 6 | 0.1593 | 15.194 | 16.992 | 13.333 | 29.084 | 18.843 |
| 6 | 0.1603 | 9.980  | 9.835  | 7.401  | 16.694 | 10.550 |
| 6 | 0.1613 | 7.959  | 6.439  | 6.581  | 15.224 | 18.721 |
| 6 | 0.1623 | 26.437 | 21.168 | 21.003 | 21.821 | 30.622 |
| 6 | 0.1633 | 29.656 | 22.757 | 25.060 | 25.615 | 12.435 |
| 6 | 0.1643 | 23.763 | 22.300 | 19.407 | 9.221  | 9.654  |
| 6 | 0.1653 | 22.367 | 16.564 | 19.396 | 14.229 | 13.653 |
| 6 | 0.1663 | 22.773 | 16.020 | 19.390 | 13.313 | 13.072 |
| 6 | 0.1673 | 28.677 | 22.273 | 23.353 | 17.700 | 19.837 |
| 6 | 0.1683 | 21.943 | 17.336 | 14.621 | 12.065 | 20.606 |
| 6 | 0.1693 | 24.387 | 22.386 | 15.543 | 15.665 | 23.730 |
| 6 | 0.1703 | 29.166 | 30.428 | 39.664 | 21.597 | 33.689 |
| 6 | 0.1713 | 31.268 | 34.425 | 33.728 | 17.002 | 17.290 |
| 6 | 0.1723 | 27.140 | 23.374 | 21.821 | 34.425 | 15.316 |
| 6 | 0.1733 | 22.520 | 22.448 | 23.467 | 15.327 | 16.256 |
| 6 | 0.1743 | 20.103 | 14.393 | 15.861 | 5.410  | 11.624 |
| 6 | 0.1753 | 17.137 | 10.377 | 11.832 | 7.553  | 13.150 |
| 6 | 0.1763 | 6.778  | 6.823  | 10.060 | 10.200 | 12.952 |
| 6 | 0.1773 | 9.247  | 15.242 | 14.088 | 16.455 | 17.039 |
| 6 | 0.1783 | 21.148 | 28.284 | 18.568 | 26.649 | 17.180 |
| 6 | 0.1793 | 16.532 | 13.317 | 13.099 | 22.152 | 23.560 |
| 6 | 0.1803 | 19.505 | 24.831 | 12.867 | 27.740 | 13.075 |
| 6 | 0.1813 | 18.592 | 10.011 | 14.226 | 20.805 | 13.903 |
| 6 | 0.1823 | 9.365  | 10.000 | 8.651  | 5.464  | 4.455  |
| 6 | 0.1833 | 17.983 | 16.547 | 13.428 | 6.723  | 7.745  |
| 6 | 0.1843 | 18.631 | 18.313 | 19.356 | 19.118 | 17.727 |
| 6 | 0.1853 | 28.941 | 24.891 | 21.645 | 11.911 | 21.897 |
| 6 | 0.1863 | 11.272 | 14.824 | 9.211  | 27.440 | 10.272 |
| 6 | 0.1873 | 12.100 | 6.414  | 7.234  | 21.296 | 6.105  |
| 6 | 0.1883 | 11.724 | 7.068  | 7.003  | 22.579 | 5.864  |
| 6 | 0.1893 | 13.602 | 10.124 | 9.810  | 12.722 | 14.003 |
| 6 | 0.1903 | 23.629 | 28.808 | 16.897 | 31.190 | 18.426 |
| 6 | 0.1913 | 16.782 | 18.132 | 14.538 | 19.729 | 12.569 |
| 6 | 0.1923 | 12.714 | 10.141 | 12.391 | 25.864 | 9.283  |
| 6 | 0.1933 | 8.000  | 12.957 | 9.315  | 12.806 | 5.779  |
| 6 | 0.1943 | 22.228 | 21.892 | 16.976 | 12.953 | 9.978  |
| 6 | 0.1953 | 8.105  | 7.517  | 4.811  | 18.217 | 12.204 |
| 6 | 0.1963 | 9.328  | 10.498 | 6.693  | 21.439 | 20.074 |
| 6 | 0.1973 | 17.821 | 16.323 | 16.275 | 13.237 | 17.220 |
| 6 | 0.1983 | 13.692 | 15.056 | 11.734 | 17.090 | 16.264 |
| 6 | 0.1993 | 19.132 | 20.826 | 21.009 | 14.585 | 21.264 |
| 6 | 0.2003 | 26.415 | 34.777 | 25.507 | 17.659 | 14.264 |
| 6 | 0.2013 | 17.689 | 27.189 | 21.194 | 18.837 | 10.929 |
| 6 | 0.2023 | 19.139 | 21.711 | 14.165 | 19.407 | 18.608 |
| 6 | 0.2033 | 11.777 | 23.655 | 15.852 | 20.407 | 7.920  |
| 6 | 0.2043 | 11.684 | 23.129 | 15.799 | 19.861 | 8.291  |

|   |        |        |        |        |        |        |
|---|--------|--------|--------|--------|--------|--------|
| 6 | 0.2053 | 8.172  | 20.244 | 11.801 | 19.883 | 20.916 |
| 6 | 0.2063 | 12.840 | 12.298 | 14.548 | 14.742 | 15.106 |
| 6 | 0.2073 | 20.895 | 26.344 | 24.697 | 17.666 | 17.826 |
| 6 | 0.2083 | 14.796 | 14.902 | 14.635 | 19.072 | 8.473  |
| 6 | 0.2093 | 19.186 | 20.899 | 21.643 | 31.685 | 14.836 |
| 6 | 0.2103 | 12.416 | 18.214 | 14.098 | 33.538 | 24.607 |
| 6 | 0.2113 | 14.886 | 13.178 | 18.235 | 29.381 | 11.691 |
| 6 | 0.2123 | 15.567 | 25.596 | 18.144 | 23.247 | 17.578 |
| 6 | 0.2133 | 14.348 | 23.772 | 18.281 | 24.540 | 22.386 |
| 6 | 0.2143 | 16.798 | 23.174 | 22.759 | 26.722 | 19.725 |
| 6 | 0.2153 | 15.872 | 17.334 | 14.795 | 28.496 | 29.855 |
| 6 | 0.2163 | 13.473 | 19.428 | 18.467 | 24.815 | 28.903 |
| 6 | 0.2173 | 11.692 | 18.378 | 15.718 | 33.227 | 24.974 |
| 6 | 0.2183 | 10.401 | 14.194 | 14.596 | 29.034 | 24.938 |
| 6 | 0.2193 | 8.309  | 10.955 | 13.493 | 19.298 | 16.029 |
| 6 | 0.2203 | 6.220  | 9.093  | 12.786 | 19.499 | 18.102 |
| 6 | 0.2213 | 8.000  | 7.962  | 7.678  | 24.816 | 18.594 |
| 6 | 0.2223 | 10.031 | 11.035 | 13.376 | 8.901  | 18.578 |
| 6 | 0.2233 | 17.381 | 16.034 | 17.860 | 19.402 | 19.566 |
| 6 | 0.2243 | 15.460 | 15.676 | 13.675 | 17.815 | 21.621 |
| 6 | 0.2253 | 18.473 | 14.559 | 20.051 | 11.721 | 18.158 |
| 6 | 0.2263 | 11.397 | 9.791  | 15.754 | 5.144  | 3.258  |
| 6 | 0.2273 | 7.145  | 10.350 | 10.241 | 12.926 | 11.726 |
| 6 | 0.2283 | 29.626 | 19.975 | 29.499 | 14.541 | 9.801  |
| 6 | 0.2293 | 7.127  | 8.872  | 13.689 | 10.617 | 15.857 |
| 6 | 0.2303 | 3.226  | 10.143 | 5.180  | 12.446 | 12.780 |
| 6 | 0.2313 | 8.940  | 8.161  | 5.227  | 13.927 | 13.875 |
| 6 | 0.2323 | 5.643  | 9.186  | 4.830  | 12.036 | 12.389 |
| 6 | 0.2333 | 6.505  | 17.122 | 8.668  | 22.997 | 18.129 |
| 6 | 0.2343 | 5.249  | 7.120  | 3.382  | 20.971 | 14.441 |
| 6 | 0.2353 | 10.498 | 10.829 | 12.833 | 10.930 | 12.948 |
| 6 | 0.2363 | 11.077 | 14.225 | 17.634 | 16.193 | 13.105 |
| 6 | 0.2373 | 8.490  | 10.967 | 11.414 | 12.596 | 15.215 |
| 6 | 0.2383 | 13.675 | 15.722 | 20.605 | 10.974 | 21.060 |
| 6 | 0.2393 | 6.412  | 7.779  | 10.709 | 5.113  | 19.905 |
| 6 | 0.2403 | 17.143 | 9.341  | 9.156  | 20.335 | 15.027 |
| 6 | 0.2413 | 10.631 | 10.685 | 10.703 | 24.513 | 14.984 |
| 6 | 0.2423 | 3.456  | 3.883  | 4.966  | 10.721 | 12.129 |
| 6 | 0.2433 | 11.430 | 8.075  | 10.083 | 12.819 | 16.080 |
| 6 | 0.2443 | 11.808 | 11.069 | 12.144 | 13.684 | 16.313 |
| 6 | 0.2453 | 8.817  | 11.990 | 14.156 | 14.819 | 20.003 |
| 6 | 0.2463 | 16.374 | 22.654 | 24.354 | 19.697 | 15.935 |
| 6 | 0.2473 | 16.303 | 22.664 | 24.324 | 20.090 | 15.922 |
| 6 | 0.2483 | 12.734 | 14.232 | 14.626 | 16.073 | 18.516 |
| 6 | 0.2493 | 9.185  | 7.681  | 7.693  | 18.759 | 10.244 |
| 6 | 0.2503 | 9.556  | 7.996  | 5.957  | 14.877 | 15.665 |
| 6 | 0.2513 | 8.775  | 12.693 | 3.357  | 17.445 | 20.239 |
| 6 | 0.2523 | 10.757 | 13.024 | 7.141  | 11.070 | 11.686 |
| 6 | 0.2533 | 13.529 | 6.965  | 5.474  | 13.744 | 16.830 |
| 6 | 0.2543 | 16.136 | 9.101  | 8.838  | 15.529 | 18.516 |

|   |        |        |        |        |        |        |
|---|--------|--------|--------|--------|--------|--------|
| 6 | 0.2553 | 17.968 | 21.624 | 11.788 | 25.736 | 8.899  |
| 6 | 0.2563 | 19.380 | 24.124 | 13.495 | 24.757 | 9.825  |
| 6 | 0.2573 | 7.903  | 3.121  | 5.041  | 15.027 | 12.293 |
| 6 | 0.2583 | 18.614 | 10.278 | 8.608  | 19.404 | 14.546 |
| 6 | 0.2593 | 10.026 | 7.204  | 7.384  | 9.479  | 12.722 |
| 6 | 0.2603 | 5.732  | 7.240  | 7.240  | 15.028 | 9.841  |
| 6 | 0.2613 | 13.062 | 6.508  | 12.503 | 18.941 | 8.015  |
| 6 | 0.2623 | 10.099 | 7.158  | 6.978  | 10.138 | 8.691  |
| 6 | 0.2633 | 12.546 | 6.813  | 12.133 | 15.223 | 7.568  |
| 6 | 0.2643 | 15.548 | 10.486 | 12.594 | 19.994 | 9.071  |
| 6 | 0.2653 | 25.545 | 9.607  | 16.895 | 23.348 | 24.233 |
| 6 | 0.2663 | 17.227 | 10.200 | 12.132 | 12.262 | 18.916 |
| 6 | 0.2673 | 12.249 | 8.382  | 9.910  | 15.949 | 19.183 |
| 6 | 0.2683 | 10.468 | 5.253  | 5.714  | 8.077  | 8.206  |
| 6 | 0.2693 | 8.625  | 8.619  | 8.578  | 8.965  | 2.486  |
| 6 | 0.2703 | 6.784  | 4.279  | 7.151  | 4.316  | 2.316  |
| 6 | 0.2713 | 5.014  | 5.007  | 7.707  | 13.429 | 11.839 |
| 6 | 0.2723 | 6.188  | 4.769  | 9.700  | 10.091 | 20.899 |
| 6 | 0.2733 | 6.174  | 4.763  | 9.654  | 10.088 | 20.916 |
| 6 | 0.2743 | 15.867 | 7.934  | 7.561  | 19.176 | 25.360 |
| 6 | 0.2753 | 18.247 | 17.700 | 11.335 | 18.167 | 7.848  |
| 6 | 0.2763 | 14.937 | 9.467  | 12.991 | 8.989  | 6.993  |
| 6 | 0.2773 | 12.589 | 10.911 | 9.828  | 16.711 | 8.962  |
| 6 | 0.2783 | 9.721  | 13.624 | 6.893  | 26.177 | 7.448  |
| 6 | 0.2793 | 10.182 | 13.619 | 7.608  | 20.783 | 10.364 |
| 6 | 0.2803 | 14.431 | 18.523 | 9.543  | 20.699 | 25.253 |
| 6 | 0.2813 | 12.192 | 11.779 | 11.612 | 17.193 | 16.403 |
| 6 | 0.2823 | 18.802 | 11.861 | 12.181 | 21.023 | 22.333 |
| 6 | 0.2833 | 15.067 | 5.624  | 9.315  | 8.684  | 9.972  |
| 6 | 0.2843 | 19.353 | 15.514 | 15.619 | 18.250 | 7.554  |
| 6 | 0.2853 | 25.562 | 14.077 | 13.523 | 20.240 | 9.359  |
| 6 | 0.2863 | 11.392 | 6.803  | 7.201  | 9.371  | 8.805  |
| 6 | 0.2873 | 18.440 | 13.726 | 14.410 | 27.135 | 9.989  |
| 6 | 0.2883 | 12.562 | 10.564 | 8.369  | 16.971 | 6.660  |
| 6 | 0.2893 | 17.661 | 13.350 | 12.825 | 17.457 | 10.494 |
| 6 | 0.2903 | 12.667 | 15.223 | 10.349 | 20.555 | 13.702 |
| 6 | 0.2913 | 8.306  | 10.425 | 7.019  | 16.401 | 10.680 |
| 6 | 0.2923 | 14.913 | 12.468 | 9.965  | 21.865 | 15.616 |
| 6 | 0.2933 | 24.155 | 13.936 | 16.376 | 17.271 | 8.106  |
| 6 | 0.2943 | 24.115 | 16.048 | 16.740 | 16.332 | 10.453 |
| 6 | 0.2953 | 19.080 | 8.392  | 17.390 | 15.788 | 24.792 |
| 6 | 0.2963 | 9.712  | 4.253  | 9.005  | 15.102 | 6.507  |
| 6 | 0.2973 | 9.385  | 4.754  | 9.733  | 17.803 | 7.954  |
| 6 | 0.2983 | 15.785 | 11.299 | 13.608 | 19.694 | 12.482 |
| 6 | 0.2993 | 18.687 | 9.879  | 14.664 | 23.029 | 16.484 |
| 6 | 0.3003 | 12.686 | 10.151 | 10.480 | 20.640 | 19.218 |
| 6 | 0.3013 | 13.331 | 11.483 | 9.172  | 11.573 | 6.166  |
| 6 | 0.3023 | 12.557 | 11.784 | 7.921  | 16.191 | 6.575  |
| 6 | 0.3033 | 8.459  | 17.018 | 7.883  | 18.081 | 8.021  |
| 6 | 0.3043 | 12.420 | 16.410 | 9.178  | 21.664 | 5.823  |

|   |        |        |        |        |        |        |
|---|--------|--------|--------|--------|--------|--------|
| 6 | 0.3053 | 15.517 | 5.510  | 8.890  | 18.126 | 13.604 |
| 6 | 0.3063 | 17.836 | 10.620 | 13.828 | 17.988 | 12.423 |
| 6 | 0.3073 | 15.598 | 12.545 | 10.427 | 26.098 | 17.985 |
| 6 | 0.3083 | 14.578 | 19.708 | 12.568 | 37.095 | 15.079 |
| 6 | 0.3093 | 9.877  | 7.982  | 7.411  | 27.036 | 13.817 |
| 6 | 0.3103 | 10.119 | 6.961  | 5.006  | 29.226 | 12.325 |
| 6 | 0.3113 | 12.241 | 10.497 | 9.463  | 20.297 | 8.573  |
| 6 | 0.3123 | 28.399 | 25.168 | 21.792 | 24.053 | 17.935 |
| 6 | 0.3133 | 19.522 | 20.626 | 12.500 | 15.423 | 15.342 |
| 6 | 0.3143 | 22.556 | 21.149 | 15.968 | 16.729 | 6.846  |
| 6 | 0.3153 | 16.984 | 13.095 | 11.009 | 14.259 | 11.278 |
| 6 | 0.3163 | 8.370  | 13.710 | 7.470  | 28.655 | 10.774 |
| 6 | 0.3173 | 20.776 | 15.565 | 17.274 | 19.727 | 9.682  |
| 6 | 0.3183 | 22.062 | 21.467 | 19.254 | 16.104 | 11.715 |
| 6 | 0.3193 | 7.291  | 11.277 | 6.988  | 18.276 | 5.495  |
| 6 | 0.3203 | 12.523 | 12.989 | 11.189 | 14.411 | 4.982  |
| 6 | 0.3213 | 17.990 | 14.652 | 14.839 | 10.379 | 6.945  |
| 6 | 0.3223 | 10.103 | 10.947 | 16.452 | 4.644  | 9.043  |
| 6 | 0.3233 | 14.889 | 11.421 | 11.770 | 13.823 | 13.431 |
| 6 | 0.3243 | 21.988 | 18.773 | 13.062 | 18.098 | 20.404 |
| 6 | 0.3253 | 13.998 | 9.294  | 6.550  | 18.847 | 32.373 |
| 6 | 0.3263 | 4.111  | 2.400  | 1.510  | 11.767 | 8.142  |
| 6 | 0.3273 | 17.140 | 17.928 | 17.833 | 12.423 | 7.830  |
| 6 | 0.3283 | 20.408 | 25.887 | 17.815 | 21.532 | 11.790 |
| 6 | 0.3293 | 13.359 | 13.723 | 9.295  | 24.956 | 9.155  |
| 6 | 0.3303 | 31.122 | 20.355 | 22.046 | 25.974 | 7.169  |
| 6 | 0.3313 | 21.754 | 15.421 | 17.168 | 9.961  | 5.073  |
| 6 | 0.3323 | 25.859 | 16.888 | 17.890 | 26.868 | 16.023 |
| 6 | 0.3333 | 20.284 | 19.520 | 13.451 | 6.650  | 20.326 |
| 6 | 0.3343 | 19.822 | 10.604 | 13.787 | 9.873  | 11.458 |
| 6 | 0.3353 | 24.286 | 14.422 | 9.801  | 27.565 | 30.094 |
| 6 | 0.3363 | 18.173 | 12.939 | 10.169 | 23.704 | 20.062 |
| 6 | 0.3373 | 22.866 | 16.767 | 16.270 | 14.549 | 13.317 |
| 6 | 0.3383 | 22.495 | 15.832 | 16.137 | 13.576 | 13.600 |
| 6 | 0.3393 | 18.014 | 13.329 | 15.143 | 12.267 | 10.208 |
| 6 | 0.3403 | 18.415 | 14.278 | 15.072 | 13.259 | 10.001 |
| 6 | 0.3413 | 19.692 | 16.151 | 16.965 | 11.627 | 10.394 |
| 6 | 0.3423 | 21.944 | 14.004 | 16.362 | 22.096 | 10.102 |
| 6 | 0.3433 | 10.630 | 5.911  | 9.174  | 16.841 | 17.041 |
| 6 | 0.3443 | 8.282  | 6.965  | 5.283  | 6.030  | 6.676  |
| 6 | 0.3453 | 10.355 | 6.078  | 6.134  | 14.157 | 12.353 |
| 6 | 0.3463 | 13.103 | 11.506 | 11.198 | 12.263 | 8.726  |
| 6 | 0.3473 | 19.123 | 20.213 | 18.426 | 25.770 | 12.057 |
| 6 | 0.3483 | 18.752 | 13.965 | 16.487 | 23.944 | 30.178 |
| 6 | 0.3493 | 10.663 | 9.216  | 6.957  | 16.088 | 12.330 |
| 6 | 0.3503 | 12.525 | 11.281 | 7.661  | 16.658 | 12.473 |
| 6 | 0.3513 | 7.824  | 5.623  | 4.743  | 7.625  | 7.671  |
| 6 | 0.3523 | 19.638 | 19.545 | 15.994 | 15.328 | 6.512  |
| 6 | 0.3533 | 13.090 | 14.339 | 11.422 | 18.639 | 11.230 |
| 6 | 0.3543 | 12.236 | 16.343 | 11.797 | 26.254 | 15.626 |

|   |        |        |        |        |        |        |
|---|--------|--------|--------|--------|--------|--------|
| 6 | 0.3553 | 9.272  | 5.962  | 13.549 | 16.894 | 11.454 |
| 6 | 0.3563 | 10.417 | 9.150  | 9.485  | 10.507 | 15.807 |
| 6 | 0.3573 | 11.456 | 6.496  | 7.449  | 15.039 | 12.472 |
| 6 | 0.3583 | 18.553 | 20.608 | 13.925 | 28.399 | 15.918 |
| 6 | 0.3593 | 13.042 | 20.711 | 15.886 | 17.138 | 13.530 |
| 6 | 0.3603 | 14.796 | 12.064 | 11.124 | 13.835 | 14.429 |
| 6 | 0.3613 | 18.956 | 14.710 | 13.093 | 17.001 | 23.980 |
| 6 | 0.3623 | 15.779 | 11.040 | 11.102 | 8.154  | 12.765 |
| 6 | 0.3633 | 12.958 | 13.877 | 11.183 | 14.081 | 8.088  |
| 6 | 0.3643 | 12.107 | 6.950  | 11.248 | 10.593 | 20.238 |
| 6 | 0.3653 | 24.354 | 21.831 | 20.010 | 12.837 | 9.864  |
| 6 | 0.3663 | 17.176 | 16.432 | 17.740 | 8.244  | 4.636  |
| 6 | 0.3673 | 14.410 | 23.143 | 17.268 | 26.418 | 6.565  |
| 6 | 0.3683 | 24.085 | 15.939 | 21.144 | 14.331 | 8.487  |
| 6 | 0.3693 | 15.225 | 17.511 | 15.638 | 24.653 | 15.359 |
| 6 | 0.3703 | 11.404 | 25.891 | 14.073 | 25.930 | 13.514 |
| 6 | 0.3713 | 8.676  | 15.721 | 10.868 | 14.467 | 7.759  |
| 6 | 0.3723 | 13.843 | 12.840 | 9.318  | 6.264  | 12.948 |
| 6 | 0.3733 | 8.745  | 9.234  | 5.591  | 14.484 | 13.250 |
| 6 | 0.3743 | 12.300 | 10.839 | 7.704  | 12.288 | 14.738 |
| 6 | 0.3753 | 11.571 | 12.610 | 9.806  | 12.124 | 9.521  |
| 6 | 0.3763 | 11.603 | 21.032 | 16.141 | 16.266 | 8.716  |
| 6 | 0.3773 | 8.427  | 11.125 | 9.427  | 13.035 | 7.508  |
| 6 | 0.3783 | 10.800 | 13.130 | 10.788 | 6.652  | 9.131  |
| 6 | 0.3793 | 9.865  | 14.333 | 13.662 | 12.384 | 11.951 |
| 6 | 0.3803 | 6.083  | 16.514 | 13.351 | 18.967 | 11.321 |
| 6 | 0.3813 | 11.236 | 21.041 | 18.523 | 8.954  | 16.678 |
| 6 | 0.3823 | 9.991  | 16.956 | 11.880 | 16.625 | 11.881 |
| 6 | 0.3833 | 17.463 | 16.947 | 19.717 | 12.132 | 23.603 |
| 6 | 0.3843 | 19.213 | 21.999 | 14.774 | 19.970 | 16.781 |
| 6 | 0.3853 | 8.216  | 16.229 | 9.385  | 23.850 | 9.249  |
| 6 | 0.3863 | 11.890 | 21.841 | 12.687 | 25.933 | 13.449 |
| 6 | 0.3873 | 6.155  | 6.778  | 8.441  | 18.846 | 7.401  |
| 6 | 0.3883 | 5.053  | 7.352  | 9.278  | 12.578 | 6.936  |
| 6 | 0.3893 | 8.600  | 14.145 | 6.138  | 16.589 | 11.329 |
| 6 | 0.3903 | 8.465  | 15.646 | 7.238  | 18.525 | 10.517 |
| 6 | 0.3913 | 10.323 | 17.624 | 9.212  | 20.632 | 10.500 |
| 6 | 0.3923 | 9.053  | 10.283 | 10.122 | 28.221 | 12.401 |
| 6 | 0.3933 | 10.381 | 13.995 | 13.553 | 18.774 | 8.654  |
| 6 | 0.3943 | 10.891 | 9.578  | 7.274  | 8.172  | 5.348  |
| 6 | 0.3953 | 15.630 | 14.281 | 12.009 | 13.271 | 5.626  |
| 6 | 0.3963 | 14.310 | 13.899 | 10.862 | 11.240 | 8.022  |
| 6 | 0.3973 | 14.817 | 17.122 | 10.381 | 15.492 | 6.631  |
| 6 | 0.3983 | 11.014 | 11.802 | 10.291 | 6.588  | 6.584  |
| 6 | 0.3993 | 10.139 | 7.654  | 4.869  | 9.747  | 8.275  |
| 6 | 0.4003 | 11.527 | 7.971  | 6.950  | 8.647  | 8.944  |
| 6 | 0.4013 | 13.239 | 6.789  | 6.306  | 10.315 | 8.661  |
| 6 | 0.4023 | 10.854 | 6.680  | 6.019  | 16.274 | 19.821 |
| 6 | 0.4033 | 12.730 | 6.188  | 5.936  | 7.473  | 9.586  |
| 6 | 0.4043 | 12.794 | 6.483  | 6.120  | 6.580  | 9.461  |

|   |        |        |        |        |        |        |
|---|--------|--------|--------|--------|--------|--------|
| 6 | 0.4053 | 12.861 | 6.304  | 7.058  | 7.936  | 5.412  |
| 6 | 0.4063 | 13.563 | 7.126  | 5.565  | 13.776 | 8.430  |
| 6 | 0.4073 | 20.819 | 17.873 | 11.997 | 17.414 | 13.006 |
| 6 | 0.4083 | 7.248  | 13.689 | 6.220  | 19.150 | 7.429  |
| 6 | 0.4093 | 9.227  | 9.712  | 8.905  | 12.965 | 8.557  |
| 6 | 0.4103 | 20.162 | 18.573 | 16.938 | 18.570 | 16.622 |
| 6 | 0.4113 | 20.120 | 18.623 | 16.950 | 19.603 | 16.931 |
| 6 | 0.4123 | 20.066 | 18.698 | 16.961 | 20.484 | 17.175 |
| 6 | 0.4133 | 24.908 | 19.922 | 23.880 | 8.297  | 13.616 |
| 6 | 0.4143 | 24.979 | 20.025 | 24.029 | 8.063  | 13.686 |
| 6 | 0.4153 | 11.775 | 4.751  | 8.680  | 7.412  | 7.474  |
| 6 | 0.4163 | 7.830  | 4.401  | 9.146  | 13.294 | 5.724  |
| 6 | 0.4173 | 13.630 | 7.374  | 14.272 | 5.163  | 4.594  |
| 6 | 0.4183 | 13.807 | 7.828  | 14.475 | 5.193  | 4.565  |
| 6 | 0.4193 | 17.763 | 10.236 | 15.262 | 14.537 | 16.155 |
| 6 | 0.4203 | 15.336 | 7.160  | 9.624  | 14.775 | 10.196 |
| 6 | 0.4213 | 11.357 | 9.383  | 7.437  | 9.898  | 8.798  |
| 6 | 0.4223 | 11.374 | 9.006  | 7.412  | 9.351  | 8.938  |
| 6 | 0.4233 | 11.431 | 8.694  | 7.409  | 8.940  | 9.120  |
| 6 | 0.4243 | 14.440 | 7.549  | 13.089 | 8.321  | 9.534  |
| 6 | 0.4253 | 17.378 | 20.584 | 22.978 | 11.862 | 20.219 |
| 6 | 0.4263 | 17.386 | 20.575 | 22.978 | 11.879 | 20.175 |
| 6 | 0.4273 | 17.821 | 17.354 | 19.225 | 13.187 | 12.501 |
| 6 | 0.4283 | 14.927 | 12.033 | 17.604 | 9.149  | 8.001  |
| 6 | 0.4293 | 17.618 | 11.961 | 18.345 | 5.831  | 10.601 |
| 6 | 0.4303 | 17.394 | 8.314  | 13.331 | 12.963 | 15.386 |
| 6 | 0.4313 | 5.593  | 5.141  | 5.991  | 15.892 | 11.632 |
| 6 | 0.4323 | 14.003 | 5.393  | 5.372  | 8.004  | 11.272 |
| 6 | 0.4333 | 14.553 | 14.976 | 15.279 | 9.409  | 7.181  |
| 6 | 0.4343 | 15.178 | 17.332 | 11.738 | 11.923 | 4.885  |
| 6 | 0.4353 | 10.205 | 11.935 | 12.755 | 14.895 | 17.075 |
| 6 | 0.4363 | 8.776  | 13.668 | 8.701  | 20.600 | 13.902 |
| 6 | 0.4373 | 10.861 | 9.958  | 13.357 | 14.091 | 7.855  |
| 6 | 0.4383 | 13.039 | 17.682 | 15.827 | 12.067 | 5.588  |
| 6 | 0.4393 | 6.092  | 6.148  | 6.089  | 9.858  | 21.845 |
| 6 | 0.4403 | 15.282 | 15.933 | 19.774 | 12.505 | 15.862 |
| 6 | 0.4413 | 14.074 | 18.433 | 20.697 | 10.052 | 16.943 |
| 6 | 0.4423 | 6.863  | 5.845  | 7.156  | 5.081  | 2.503  |
| 6 | 0.4433 | 7.977  | 8.590  | 9.260  | 8.972  | 7.322  |
| 6 | 0.4443 | 9.574  | 14.203 | 12.080 | 9.947  | 9.647  |
| 6 | 0.4453 | 10.114 | 13.880 | 7.455  | 15.743 | 10.455 |
| 6 | 0.4463 | 8.741  | 15.689 | 13.371 | 14.920 | 6.478  |
| 6 | 0.4473 | 13.502 | 15.143 | 14.390 | 12.963 | 13.329 |
| 6 | 0.4483 | 17.610 | 8.157  | 12.870 | 13.629 | 16.830 |
| 6 | 0.4493 | 12.031 | 10.112 | 8.186  | 20.284 | 15.166 |
| 6 | 0.4503 | 8.305  | 9.643  | 5.002  | 17.952 | 12.820 |
| 6 | 0.4513 | 3.232  | 8.671  | 5.590  | 12.896 | 8.973  |
| 6 | 0.4523 | 13.679 | 18.797 | 13.192 | 11.029 | 14.071 |
| 6 | 0.4533 | 8.391  | 11.909 | 8.811  | 14.000 | 9.986  |
| 6 | 0.4543 | 7.057  | 9.591  | 6.456  | 15.969 | 18.692 |

|   |        |        |        |        |        |        |
|---|--------|--------|--------|--------|--------|--------|
| 6 | 0.4553 | 13.010 | 12.314 | 10.238 | 11.346 | 15.887 |
| 6 | 0.4563 | 7.297  | 13.294 | 10.465 | 12.405 | 17.752 |
| 6 | 0.4573 | 13.232 | 16.859 | 17.413 | 8.873  | 18.966 |
| 6 | 0.4583 | 18.119 | 24.467 | 19.672 | 23.618 | 10.285 |
| 6 | 0.4593 | 8.145  | 9.493  | 11.114 | 15.109 | 10.455 |
| 6 | 0.4603 | 12.621 | 23.954 | 16.163 | 24.143 | 12.131 |
| 6 | 0.4613 | 5.824  | 13.730 | 8.475  | 15.464 | 17.443 |
| 6 | 0.4623 | 9.672  | 8.174  | 9.812  | 14.647 | 15.453 |
| 6 | 0.4633 | 7.565  | 11.230 | 6.798  | 12.745 | 11.770 |
| 6 | 0.4643 | 11.272 | 14.634 | 10.257 | 11.499 | 16.349 |
| 6 | 0.4653 | 17.320 | 16.807 | 19.743 | 5.770  | 13.985 |
| 6 | 0.4663 | 12.985 | 17.218 | 19.040 | 14.493 | 36.422 |
| 6 | 0.4673 | 13.675 | 24.134 | 13.385 | 19.256 | 18.035 |
| 6 | 0.4683 | 9.002  | 14.397 | 13.317 | 17.182 | 14.688 |
| 6 | 0.4693 | 12.557 | 15.910 | 13.633 | 22.510 | 21.128 |
| 6 | 0.4703 | 11.356 | 9.127  | 10.018 | 13.023 | 3.924  |
| 6 | 0.4713 | 14.379 | 13.821 | 14.884 | 12.522 | 6.102  |
| 6 | 0.4723 | 16.234 | 15.512 | 15.929 | 11.383 | 6.990  |
| 6 | 0.4733 | 12.901 | 14.926 | 17.053 | 9.403  | 7.330  |
| 6 | 0.4743 | 12.280 | 9.013  | 9.691  | 8.164  | 7.103  |
| 6 | 0.4753 | 9.048  | 11.434 | 8.556  | 11.261 | 9.318  |
| 6 | 0.4763 | 18.763 | 16.903 | 10.044 | 26.805 | 14.519 |
| 6 | 0.4773 | 19.306 | 30.297 | 23.144 | 19.396 | 14.331 |
| 6 | 0.4783 | 19.946 | 32.695 | 23.635 | 21.660 | 14.374 |
| 6 | 0.4793 | 18.854 | 16.856 | 18.564 | 20.337 | 17.921 |
| 6 | 0.4803 | 14.987 | 12.868 | 14.832 | 8.214  | 11.559 |
| 6 | 0.4813 | 12.564 | 13.800 | 12.001 | 7.674  | 13.199 |
| 6 | 0.4823 | 17.400 | 16.649 | 15.329 | 14.994 | 3.679  |
| 6 | 0.4833 | 20.395 | 17.826 | 17.528 | 12.769 | 11.517 |
| 6 | 0.4843 | 15.108 | 17.540 | 13.247 | 23.579 | 15.430 |
| 6 | 0.4853 | 25.191 | 21.738 | 19.116 | 20.003 | 15.751 |
| 6 | 0.4863 | 17.693 | 17.904 | 14.540 | 16.958 | 15.600 |
| 6 | 0.4873 | 15.355 | 16.105 | 11.247 | 15.720 | 13.320 |
| 6 | 0.4883 | 12.384 | 18.255 | 12.978 | 15.629 | 13.358 |
| 6 | 0.4893 | 15.998 | 12.579 | 13.290 | 12.945 | 25.509 |
| 6 | 0.4903 | 19.686 | 15.677 | 12.275 | 29.601 | 24.032 |
| 6 | 0.4913 | 18.143 | 18.984 | 15.319 | 22.657 | 15.861 |
| 6 | 0.4923 | 10.099 | 7.819  | 4.939  | 15.794 | 13.612 |
| 6 | 0.4933 | 15.523 | 5.771  | 11.221 | 9.197  | 12.191 |
| 6 | 0.4943 | 12.347 | 8.133  | 10.125 | 10.841 | 16.081 |
| 6 | 0.4953 | 13.514 | 18.295 | 11.497 | 20.990 | 15.103 |
| 6 | 0.4963 | 8.017  | 10.543 | 9.152  | 10.541 | 3.250  |
| 6 | 0.4973 | 9.642  | 13.368 | 11.586 | 14.351 | 7.505  |
| 6 | 0.4983 | 12.404 | 18.031 | 13.872 | 15.572 | 10.313 |
| 6 | 0.4993 | 9.483  | 18.097 | 12.475 | 24.237 | 15.712 |
| 6 | 0.5003 | 13.250 | 17.980 | 10.509 | 31.338 | 16.621 |
| 6 | 0.5013 | 14.642 | 26.232 | 16.766 | 28.554 | 27.929 |
| 6 | 0.5023 | 8.692  | 11.624 | 12.767 | 20.013 | 21.223 |
| 6 | 0.5033 | 10.373 | 9.053  | 14.239 | 9.817  | 15.490 |
| 6 | 0.5043 | 16.285 | 18.980 | 17.421 | 12.573 | 17.287 |

|   |        |        |        |        |        |        |
|---|--------|--------|--------|--------|--------|--------|
| 6 | 0.5053 | 15.211 | 14.563 | 12.273 | 8.332  | 13.957 |
| 6 | 0.5063 | 10.360 | 18.311 | 13.139 | 22.916 | 17.391 |
| 6 | 0.5073 | 12.714 | 11.288 | 16.830 | 10.093 | 15.864 |
| 6 | 0.5083 | 9.287  | 11.598 | 13.574 | 5.293  | 8.784  |
| 6 | 0.5093 | 10.362 | 9.507  | 8.079  | 19.029 | 9.796  |
| 6 | 0.5103 | 9.302  | 6.663  | 8.781  | 8.703  | 10.679 |
| 6 | 0.5113 | 17.199 | 15.537 | 14.448 | 29.990 | 12.829 |
| 6 | 0.5123 | 10.773 | 13.067 | 13.126 | 14.430 | 7.599  |
| 6 | 0.5133 | 10.113 | 14.110 | 14.356 | 9.534  | 13.167 |
| 6 | 0.5143 | 8.782  | 12.090 | 12.004 | 10.084 | 15.647 |
| 6 | 0.5153 | 9.941  | 9.707  | 10.951 | 6.715  | 10.306 |
| 6 | 0.5163 | 5.239  | 6.212  | 7.027  | 13.321 | 3.559  |
| 6 | 0.5173 | 11.816 | 7.756  | 11.017 | 9.675  | 12.419 |
| 6 | 0.5183 | 18.390 | 18.434 | 18.527 | 15.526 | 13.590 |
| 6 | 0.5193 | 12.734 | 12.830 | 10.025 | 5.802  | 12.255 |
| 6 | 0.5203 | 18.687 | 19.721 | 17.110 | 9.525  | 11.578 |
| 6 | 0.5213 | 15.421 | 18.823 | 21.001 | 17.657 | 22.223 |
| 6 | 0.5223 | 9.922  | 15.093 | 12.354 | 13.039 | 8.015  |
| 6 | 0.5233 | 22.019 | 27.918 | 26.886 | 25.926 | 18.254 |
| 6 | 0.5243 | 14.526 | 18.852 | 18.479 | 16.671 | 14.307 |
| 6 | 0.5253 | 11.928 | 13.517 | 12.773 | 8.687  | 15.545 |
| 6 | 0.5263 | 14.622 | 20.935 | 15.502 | 7.669  | 17.009 |
| 6 | 0.5273 | 13.208 | 15.938 | 10.348 | 14.272 | 15.171 |
| 6 | 0.5283 | 11.597 | 14.946 | 9.616  | 12.626 | 9.137  |
| 6 | 0.5293 | 15.452 | 22.499 | 13.827 | 14.311 | 10.274 |
| 6 | 0.5303 | 13.850 | 20.722 | 16.051 | 28.110 | 12.942 |
| 6 | 0.5313 | 20.484 | 26.239 | 22.034 | 15.468 | 19.236 |
| 6 | 0.5323 | 5.819  | 6.707  | 8.956  | 14.761 | 15.053 |
| 6 | 0.5333 | 26.053 | 21.738 | 29.139 | 12.976 | 10.310 |
| 6 | 0.5343 | 12.320 | 12.730 | 14.603 | 11.197 | 16.152 |
| 6 | 0.5353 | 10.940 | 12.575 | 13.985 | 8.590  | 8.708  |
| 6 | 0.5363 | 7.420  | 9.708  | 9.226  | 20.855 | 10.802 |
| 6 | 0.5373 | 8.464  | 12.984 | 11.680 | 11.001 | 9.605  |
| 6 | 0.5383 | 10.304 | 15.451 | 10.586 | 15.896 | 12.314 |
| 6 | 0.5393 | 14.042 | 18.141 | 18.821 | 18.260 | 16.015 |
| 6 | 0.5403 | 12.966 | 18.564 | 19.544 | 10.476 | 13.297 |
| 6 | 0.5413 | 13.577 | 16.670 | 8.912  | 14.832 | 21.656 |
| 6 | 0.5423 | 15.835 | 14.448 | 9.966  | 10.464 | 19.632 |
| 6 | 0.5433 | 18.452 | 21.488 | 21.124 | 23.308 | 18.889 |
| 6 | 0.5443 | 15.610 | 22.965 | 22.552 | 24.401 | 10.563 |
| 6 | 0.5453 | 7.131  | 18.695 | 13.365 | 17.958 | 11.313 |
| 6 | 0.5463 | 12.579 | 15.685 | 16.685 | 21.357 | 15.430 |
| 6 | 0.5473 | 8.621  | 13.061 | 13.643 | 10.496 | 13.298 |
| 6 | 0.5483 | 9.132  | 8.850  | 6.513  | 10.980 | 8.831  |
| 6 | 0.5493 | 14.203 | 13.188 | 14.488 | 5.724  | 8.864  |
| 6 | 0.5503 | 10.390 | 14.088 | 12.904 | 7.986  | 7.662  |
| 6 | 0.5513 | 9.792  | 13.067 | 12.464 | 9.850  | 14.777 |
| 6 | 0.5523 | 15.381 | 24.985 | 16.600 | 13.376 | 15.071 |
| 6 | 0.5533 | 11.254 | 18.545 | 16.897 | 15.938 | 15.872 |
| 6 | 0.5543 | 7.222  | 7.928  | 6.972  | 12.001 | 12.984 |



|   |        |        |        |        |        |        |
|---|--------|--------|--------|--------|--------|--------|
| 6 | 0.5553 | 16.085 | 18.677 | 14.153 | 21.977 | 17.109 |
| 6 | 0.5563 | 14.013 | 23.230 | 17.889 | 16.778 | 16.923 |
| 6 | 0.5573 | 15.878 | 14.351 | 13.899 | 21.733 | 22.034 |
| 6 | 0.5583 | 14.137 | 11.469 | 8.748  | 8.981  | 16.173 |
| 6 | 0.5593 | 13.178 | 16.578 | 14.880 | 12.284 | 8.546  |
| 6 | 0.5603 | 19.625 | 17.615 | 16.618 | 18.847 | 17.675 |
| 6 | 0.5613 | 18.629 | 18.056 | 12.167 | 15.264 | 24.416 |
| 6 | 0.5623 | 21.460 | 14.014 | 16.345 | 14.880 | 22.460 |
| 6 | 0.5633 | 9.330  | 13.499 | 10.494 | 13.606 | 16.498 |
| 6 | 0.5643 | 20.589 | 28.786 | 20.305 | 11.109 | 14.876 |
| 6 | 0.5653 | 29.288 | 28.532 | 25.262 | 23.231 | 28.611 |
| 6 | 0.5663 | 27.787 | 20.302 | 20.832 | 29.385 | 21.143 |
| 6 | 0.5673 | 17.085 | 12.679 | 17.227 | 15.072 | 18.498 |
| 6 | 0.5683 | 22.563 | 14.842 | 12.574 | 20.219 | 19.800 |
| 6 | 0.5693 | 17.446 | 14.608 | 13.271 | 18.151 | 19.897 |
| 6 | 0.5703 | 20.687 | 14.066 | 18.719 | 17.915 | 10.127 |
| 6 | 0.5713 | 8.614  | 5.631  | 5.132  | 21.403 | 12.569 |
| 6 | 0.5723 | 9.223  | 11.648 | 7.383  | 25.010 | 23.334 |
| 6 | 0.5733 | 10.440 | 13.078 | 7.812  | 20.339 | 19.964 |
| 6 | 0.5743 | 20.471 | 21.373 | 14.591 | 17.931 | 27.572 |
| 6 | 0.5753 | 16.584 | 15.566 | 15.181 | 16.707 | 24.768 |
| 6 | 0.5763 | 26.032 | 29.941 | 19.770 | 23.074 | 10.949 |
| 6 | 0.5773 | 21.068 | 25.554 | 17.487 | 21.776 | 14.251 |
| 6 | 0.5783 | 26.313 | 26.319 | 22.699 | 18.997 | 21.503 |
| 6 | 0.5793 | 24.242 | 26.605 | 24.331 | 27.996 | 12.948 |
| 6 | 0.5803 | 24.392 | 17.387 | 18.535 | 43.477 | 15.969 |
| 6 | 0.5813 | 14.458 | 11.274 | 10.737 | 21.849 | 21.224 |
| 6 | 0.5823 | 29.332 | 31.140 | 27.370 | 25.113 | 26.307 |
| 6 | 0.5833 | 26.626 | 31.254 | 26.937 | 18.984 | 23.984 |
| 6 | 0.5843 | 21.934 | 24.560 | 21.133 | 22.396 | 12.272 |
| 6 | 0.5853 | 16.514 | 14.641 | 19.605 | 17.908 | 10.015 |
| 6 | 0.5863 | 14.741 | 17.942 | 13.328 | 23.442 | 15.021 |
| 6 | 0.5873 | 17.227 | 21.613 | 16.717 | 24.493 | 15.428 |
| 6 | 0.5883 | 21.484 | 21.282 | 14.308 | 14.698 | 14.209 |
| 6 | 0.5893 | 35.014 | 34.902 | 28.883 | 28.503 | 26.446 |
| 6 | 0.5903 | 18.127 | 17.818 | 15.844 | 15.078 | 17.428 |
| 6 | 0.5913 | 22.632 | 17.302 | 11.177 | 7.719  | 22.065 |
| 6 | 0.5923 | 16.125 | 9.003  | 8.784  | 14.909 | 25.441 |
| 6 | 0.5933 | 14.375 | 8.766  | 9.582  | 18.118 | 23.593 |
| 6 | 0.5943 | 22.236 | 10.081 | 15.116 | 13.917 | 16.409 |
| 6 | 0.5953 | 15.219 | 15.350 | 11.933 | 11.296 | 11.194 |
| 6 | 0.5963 | 16.280 | 17.937 | 15.856 | 18.781 | 22.347 |
| 6 | 0.5973 | 25.234 | 20.065 | 16.226 | 14.815 | 21.718 |
| 6 | 0.5983 | 27.211 | 30.800 | 25.838 | 21.989 | 11.840 |
| 6 | 0.5993 | 12.606 | 11.622 | 11.855 | 15.648 | 17.152 |
| 6 | 0.6003 | 20.703 | 23.919 | 28.672 | 16.761 | 19.882 |
| 6 | 0.6013 | 32.443 | 27.838 | 35.098 | 20.951 | 14.244 |
| 6 | 0.6023 | 16.913 | 11.376 | 16.218 | 16.772 | 22.637 |
| 6 | 0.6033 | 10.481 | 10.674 | 12.253 | 25.893 | 33.548 |
| 6 | 0.6043 | 31.000 | 31.456 | 33.092 | 24.548 | 33.945 |

|   |        |        |        |        |        |        |
|---|--------|--------|--------|--------|--------|--------|
| 6 | 0.6053 | 13.902 | 12.776 | 11.153 | 16.484 | 28.238 |
| 6 | 0.6063 | 33.950 | 32.060 | 31.838 | 18.003 | 22.960 |
| 6 | 0.6073 | 33.662 | 33.561 | 30.186 | 31.612 | 25.647 |
| 6 | 0.6083 | 26.969 | 18.163 | 22.225 | 13.563 | 14.776 |
| 6 | 0.6093 | 28.725 | 22.824 | 19.862 | 16.032 | 9.894  |
| 6 | 0.6103 | 21.026 | 19.690 | 18.472 | 16.738 | 17.103 |
| 6 | 0.6113 | 24.231 | 20.169 | 19.484 | 12.347 | 18.223 |
| 6 | 0.6123 | 23.648 | 24.134 | 23.479 | 23.719 | 30.352 |
| 6 | 0.6133 | 29.517 | 28.810 | 28.661 | 20.548 | 30.918 |
| 6 | 0.6143 | 24.289 | 27.097 | 26.493 | 17.172 | 9.718  |
| 6 | 0.6153 | 22.021 | 12.602 | 14.243 | 20.776 | 22.451 |
| 6 | 0.6163 | 25.293 | 26.392 | 27.610 | 13.155 | 24.533 |
| 6 | 0.6173 | 27.357 | 24.260 | 31.712 | 16.411 | 13.312 |
| 6 | 0.6183 | 28.004 | 28.141 | 38.118 | 16.904 | 24.408 |
| 6 | 0.6193 | 13.866 | 17.109 | 17.710 | 13.727 | 7.680  |
| 6 | 0.6203 | 11.935 | 21.018 | 17.970 | 18.543 | 21.669 |
| 6 | 0.6213 | 25.682 | 20.177 | 24.120 | 21.744 | 28.344 |
| 6 | 0.6223 | 20.611 | 18.856 | 18.603 | 12.156 | 20.793 |
| 6 | 0.6233 | 20.065 | 12.893 | 19.332 | 11.793 | 27.646 |
| 6 | 0.6243 | 30.812 | 22.619 | 31.785 | 18.584 | 22.385 |
| 6 | 0.6253 | 26.873 | 26.688 | 31.070 | 21.927 | 16.207 |
| 6 | 0.6263 | 26.084 | 22.501 | 29.722 | 20.493 | 13.870 |
| 6 | 0.6273 | 18.821 | 12.445 | 15.820 | 20.410 | 24.690 |
| 6 | 0.6283 | 12.239 | 12.617 | 14.839 | 25.759 | 36.507 |
| 6 | 0.6293 | 12.398 | 13.192 | 14.720 | 28.057 | 37.225 |
| 6 | 0.6303 | 25.443 | 15.664 | 25.855 | 26.453 | 13.876 |
| 6 | 0.6313 | 28.357 | 19.480 | 25.049 | 25.523 | 21.274 |
| 6 | 0.6323 | 26.227 | 14.210 | 24.346 | 18.081 | 27.050 |
| 6 | 0.6333 | 30.387 | 18.911 | 23.373 | 15.720 | 17.650 |
| 6 | 0.6343 | 16.879 | 14.613 | 18.424 | 14.159 | 37.656 |
| 6 | 0.6353 | 21.142 | 10.280 | 18.812 | 7.757  | 30.384 |
| 6 | 0.6363 | 28.106 | 13.950 | 24.077 | 20.495 | 28.631 |
| 6 | 0.6373 | 19.104 | 13.560 | 14.538 | 22.727 | 25.355 |
| 6 | 0.6383 | 8.564  | 11.270 | 5.965  | 31.305 | 22.158 |
| 6 | 0.6393 | 27.036 | 26.046 | 24.991 | 27.249 | 35.600 |
| 6 | 0.6403 | 29.431 | 32.846 | 40.632 | 18.683 | 39.571 |
| 6 | 0.6413 | 18.683 | 25.479 | 29.112 | 19.748 | 12.826 |
| 6 | 0.6423 | 15.350 | 8.467  | 11.081 | 10.799 | 21.230 |
| 6 | 0.6433 | 15.505 | 8.308  | 11.002 | 10.767 | 21.460 |
| 6 | 0.6443 | 13.135 | 18.031 | 21.815 | 22.601 | 37.281 |
| 6 | 0.6453 | 13.614 | 15.716 | 25.905 | 20.649 | 39.889 |
| 6 | 0.6463 | 13.029 | 15.875 | 25.195 | 23.010 | 40.491 |
| 6 | 0.6473 | 10.953 | 14.773 | 20.092 | 10.620 | 26.553 |
| 6 | 0.6483 | 20.822 | 20.467 | 28.142 | 29.682 | 32.244 |
| 6 | 0.6493 | 24.702 | 22.400 | 27.309 | 31.665 | 33.835 |
| 6 | 0.6503 | 32.101 | 23.844 | 27.589 | 24.217 | 52.703 |
| 6 | 0.6513 | 14.483 | 10.842 | 7.565  | 16.374 | 41.909 |
| 6 | 0.6523 | 26.351 | 37.462 | 32.268 | 18.876 | 20.307 |
| 6 | 0.6533 | 14.919 | 25.472 | 18.444 | 25.030 | 30.245 |
| 6 | 0.6543 | 18.189 | 18.050 | 23.878 | 31.232 | 44.055 |

|   |        |        |        |        |        |        |
|---|--------|--------|--------|--------|--------|--------|
| 6 | 0.6553 | 14.479 | 18.618 | 24.998 | 27.364 | 34.619 |
| 6 | 0.6563 | 35.399 | 27.964 | 34.935 | 19.251 | 54.159 |
| 6 | 0.6573 | 21.412 | 21.429 | 25.251 | 26.798 | 40.274 |
| 6 | 0.6583 | 14.385 | 9.804  | 20.218 | 19.751 | 23.225 |
| 6 | 0.6593 | 16.437 | 6.412  | 17.469 | 22.744 | 14.966 |
| 6 | 0.6603 | 13.517 | 12.411 | 14.616 | 23.384 | 19.868 |
| 6 | 0.6613 | 20.030 | 11.086 | 18.690 | 14.634 | 35.374 |
| 6 | 0.6623 | 17.171 | 10.301 | 14.407 | 22.334 | 46.375 |
| 6 | 0.6633 | 14.090 | 12.831 | 14.712 | 9.818  | 34.247 |
| 6 | 0.6643 | 14.616 | 15.447 | 16.562 | 9.005  | 40.601 |
| 6 | 0.6653 | 9.916  | 6.906  | 11.260 | 9.796  | 26.621 |
| 6 | 0.6663 | 9.353  | 12.061 | 8.852  | 21.270 | 31.622 |
| 6 | 0.6673 | 16.143 | 11.792 | 13.107 | 11.638 | 15.752 |
| 6 | 0.6683 | 13.364 | 11.205 | 14.901 | 20.923 | 25.826 |
| 6 | 0.6693 | 10.473 | 14.694 | 14.547 | 25.382 | 43.035 |
| 6 | 0.6703 | 10.530 | 16.615 | 14.520 | 26.416 | 33.531 |
| 6 | 0.6713 | 16.706 | 26.109 | 30.115 | 17.706 | 19.715 |
| 6 | 0.6723 | 6.968  | 10.959 | 12.775 | 17.648 | 36.658 |
| 6 | 0.6733 | 16.224 | 13.823 | 23.431 | 12.756 | 36.194 |
| 6 | 0.6743 | 9.082  | 11.762 | 11.993 | 11.024 | 34.150 |
| 6 | 0.6753 | 8.077  | 9.200  | 10.909 | 12.905 | 45.100 |
| 6 | 0.6763 | 21.228 | 13.779 | 22.860 | 19.615 | 13.805 |
| 6 | 0.6773 | 21.004 | 13.863 | 22.964 | 19.352 | 13.791 |
| 6 | 0.6783 | 4.860  | 9.252  | 8.804  | 14.924 | 8.933  |
| 6 | 0.6793 | 10.310 | 12.695 | 13.627 | 12.862 | 14.584 |
| 6 | 0.6803 | 14.888 | 14.139 | 19.560 | 5.717  | 29.384 |
| 6 | 0.6813 | 9.818  | 13.541 | 12.452 | 12.888 | 20.833 |
| 6 | 0.6823 | 12.394 | 8.106  | 7.724  | 16.645 | 30.465 |
| 6 | 0.6833 | 7.636  | 8.730  | 11.777 | 14.019 | 30.383 |
| 6 | 0.6843 | 12.314 | 13.632 | 18.656 | 22.787 | 34.725 |
| 6 | 0.6853 | 10.021 | 13.711 | 17.328 | 18.176 | 33.281 |
| 6 | 0.6863 | 5.101  | 6.326  | 6.665  | 10.117 | 36.434 |
| 6 | 0.6873 | 16.675 | 19.424 | 26.195 | 17.799 | 29.268 |
| 6 | 0.6883 | 16.690 | 22.516 | 25.484 | 11.503 | 35.584 |
| 6 | 0.6893 | 19.361 | 13.547 | 12.407 | 11.882 | 28.775 |
| 6 | 0.6903 | 14.523 | 9.489  | 8.787  | 15.029 | 24.356 |
| 6 | 0.6913 | 23.890 | 27.004 | 26.559 | 14.137 | 26.086 |
| 6 | 0.6923 | 25.039 | 23.682 | 29.046 | 16.926 | 22.020 |
| 6 | 0.6933 | 27.583 | 29.849 | 30.224 | 18.232 | 27.039 |
| 6 | 0.6943 | 18.601 | 28.397 | 26.368 | 21.477 | 25.866 |
| 6 | 0.6953 | 11.222 | 9.917  | 10.363 | 12.346 | 12.845 |
| 6 | 0.6963 | 11.805 | 8.360  | 10.428 | 19.217 | 37.390 |
| 6 | 0.6973 | 14.582 | 8.029  | 11.789 | 24.995 | 42.754 |
| 6 | 0.6983 | 17.573 | 16.655 | 12.924 | 27.315 | 52.283 |
| 6 | 0.6993 | 22.036 | 15.083 | 15.350 | 12.666 | 9.171  |
| 6 | 0.7003 | 29.351 | 15.675 | 20.957 | 7.615  | 17.425 |
| 6 | 0.7013 | 13.410 | 9.729  | 11.154 | 16.763 | 23.763 |
| 6 | 0.7023 | 12.017 | 13.387 | 12.967 | 20.740 | 49.869 |
| 6 | 0.7033 | 13.852 | 19.568 | 18.160 | 20.693 | 38.478 |
| 6 | 0.7043 | 15.827 | 9.441  | 11.516 | 24.007 | 25.495 |

|   |        |        |        |        |        |         |
|---|--------|--------|--------|--------|--------|---------|
| 6 | 0.7053 | 10.842 | 8.826  | 12.427 | 10.327 | 13.554  |
| 6 | 0.7063 | 24.358 | 17.127 | 20.966 | 19.899 | 55.256  |
| 6 | 0.7073 | 21.394 | 12.342 | 15.880 | 23.125 | 39.358  |
| 6 | 0.7083 | 24.731 | 24.919 | 23.755 | 38.158 | 70.673  |
| 6 | 0.7093 | 25.728 | 16.178 | 27.686 | 25.240 | 58.741  |
| 6 | 0.7103 | 15.572 | 15.348 | 9.647  | 29.830 | 48.967  |
| 6 | 0.7113 | 11.113 | 10.502 | 13.438 | 17.455 | 46.917  |
| 6 | 0.7123 | 19.961 | 16.917 | 16.890 | 30.811 | 53.370  |
| 6 | 0.7133 | 16.921 | 21.118 | 17.567 | 26.949 | 50.320  |
| 6 | 0.7143 | 28.552 | 22.803 | 21.281 | 19.921 | 65.078  |
| 6 | 0.7153 | 34.205 | 19.467 | 25.754 | 22.716 | 50.773  |
| 6 | 0.7163 | 22.604 | 16.207 | 20.831 | 15.070 | 14.827  |
| 6 | 0.7173 | 17.251 | 13.295 | 15.034 | 26.004 | 40.250  |
| 6 | 0.7183 | 19.466 | 11.497 | 12.093 | 30.067 | 51.030  |
| 6 | 0.7193 | 20.602 | 11.155 | 11.798 | 30.659 | 51.844  |
| 6 | 0.7203 | 18.923 | 13.027 | 10.778 | 33.808 | 49.910  |
| 6 | 0.7213 | 18.973 | 13.318 | 10.955 | 33.936 | 49.447  |
| 6 | 0.7223 | 13.892 | 8.547  | 6.262  | 31.273 | 62.372  |
| 6 | 0.7233 | 15.942 | 21.534 | 15.154 | 44.898 | 82.866  |
| 6 | 0.7243 | 18.142 | 25.530 | 18.659 | 48.658 | 83.536  |
| 6 | 0.7253 | 9.018  | 11.460 | 7.630  | 22.658 | 20.734  |
| 6 | 0.7263 | 6.244  | 8.173  | 8.274  | 15.620 | 19.103  |
| 6 | 0.7273 | 13.294 | 13.453 | 10.625 | 24.845 | 41.855  |
| 6 | 0.7283 | 10.304 | 9.169  | 8.006  | 17.189 | 36.027  |
| 6 | 0.7293 | 8.605  | 20.528 | 17.963 | 26.710 | 46.598  |
| 6 | 0.7303 | 20.522 | 21.855 | 25.379 | 26.340 | 53.861  |
| 6 | 0.7313 | 21.138 | 16.780 | 18.130 | 30.042 | 62.679  |
| 6 | 0.7323 | 39.524 | 25.481 | 25.516 | 26.979 | 71.554  |
| 6 | 0.7333 | 28.696 | 21.735 | 25.554 | 26.564 | 69.199  |
| 6 | 0.7343 | 25.646 | 17.829 | 19.401 | 18.165 | 38.254  |
| 6 | 0.7353 | 20.165 | 21.808 | 26.301 | 14.208 | 38.537  |
| 6 | 0.7363 | 16.577 | 17.673 | 24.243 | 17.211 | 49.930  |
| 6 | 0.7373 | 11.775 | 12.223 | 15.139 | 19.715 | 58.515  |
| 6 | 0.7383 | 14.210 | 17.221 | 18.328 | 43.021 | 106.204 |
| 6 | 0.7393 | 16.103 | 18.075 | 13.829 | 49.273 | 79.968  |
| 6 | 0.7403 | 18.980 | 15.523 | 20.776 | 42.855 | 78.273  |
| 6 | 0.7413 | 16.066 | 19.929 | 18.648 | 21.543 | 47.196  |
| 6 | 0.7423 | 7.873  | 16.999 | 18.070 | 15.721 | 33.405  |
| 6 | 0.7433 | 14.964 | 12.094 | 14.378 | 31.468 | 37.522  |
| 6 | 0.7443 | 22.797 | 17.721 | 24.458 | 30.400 | 60.962  |
| 6 | 0.7453 | 17.141 | 11.785 | 12.150 | 32.591 | 51.596  |
| 6 | 0.7463 | 10.231 | 8.448  | 6.799  | 41.267 | 46.039  |
| 6 | 0.7473 | 24.016 | 11.213 | 16.464 | 23.577 | 36.661  |
| 6 | 0.7483 | 18.682 | 10.131 | 13.547 | 27.606 | 28.220  |
| 6 | 0.7493 | 19.233 | 10.018 | 4.588  | 46.705 | 62.265  |
| 6 | 0.7503 | 16.407 | 10.519 | 13.532 | 53.785 | 100.590 |
| 6 | 0.7513 | 18.296 | 9.523  | 11.111 | 46.452 | 79.314  |
| 6 | 0.7523 | 22.802 | 7.847  | 10.538 | 42.954 | 74.372  |
| 6 | 0.7533 | 30.813 | 15.544 | 20.943 | 35.358 | 73.673  |
| 6 | 0.7543 | 26.795 | 16.838 | 22.496 | 39.535 | 83.828  |

|   |        |        |        |        |        |         |
|---|--------|--------|--------|--------|--------|---------|
| 6 | 0.7553 | 27.696 | 18.957 | 22.120 | 42.606 | 80.014  |
| 6 | 0.7563 | 24.294 | 23.840 | 22.230 | 49.094 | 85.770  |
| 6 | 0.7573 | 15.429 | 14.241 | 10.152 | 41.536 | 95.814  |
| 6 | 0.7583 | 21.949 | 14.124 | 10.223 | 44.900 | 94.703  |
| 6 | 0.7593 | 11.169 | 10.330 | 9.106  | 33.206 | 58.055  |
| 6 | 0.7603 | 15.640 | 14.130 | 12.631 | 56.756 | 96.491  |
| 6 | 0.7613 | 21.514 | 19.946 | 10.594 | 44.009 | 78.193  |
| 6 | 0.7623 | 14.849 | 15.127 | 8.744  | 36.561 | 86.386  |
| 6 | 0.7633 | 10.419 | 13.184 | 8.283  | 43.213 | 80.488  |
| 6 | 0.7643 | 11.936 | 13.409 | 10.217 | 42.548 | 79.543  |
| 6 | 0.7653 | 15.872 | 9.177  | 12.671 | 46.569 | 79.552  |
| 6 | 0.7663 | 21.913 | 8.191  | 11.471 | 55.022 | 107.800 |
| 6 | 0.7673 | 18.528 | 9.861  | 12.983 | 52.885 | 104.747 |
| 6 | 0.7683 | 25.096 | 23.231 | 22.573 | 59.010 | 106.674 |
| 6 | 0.7693 | 26.218 | 30.377 | 26.595 | 59.256 | 104.635 |
| 6 | 0.7703 | 15.136 | 16.937 | 18.862 | 66.843 | 128.872 |
| 6 | 0.7713 | 20.473 | 16.745 | 17.714 | 45.219 | 104.355 |
| 6 | 0.7723 | 20.239 | 28.615 | 24.890 | 33.947 | 49.328  |
| 6 | 0.7733 | 20.111 | 28.560 | 23.908 | 34.381 | 48.566  |
| 6 | 0.7743 | 15.381 | 15.516 | 17.686 | 25.782 | 40.329  |
| 6 | 0.7753 | 15.192 | 11.689 | 13.371 | 25.092 | 68.995  |
| 6 | 0.7763 | 15.480 | 12.780 | 9.636  | 29.575 | 101.617 |
| 6 | 0.7773 | 17.234 | 7.701  | 5.411  | 39.447 | 95.141  |
| 6 | 0.7783 | 14.580 | 8.707  | 6.071  | 37.715 | 73.203  |
| 6 | 0.7793 | 11.885 | 7.058  | 7.804  | 29.274 | 71.643  |
| 6 | 0.7803 | 12.947 | 7.622  | 12.079 | 38.552 | 70.136  |
| 6 | 0.7813 | 27.960 | 16.938 | 15.787 | 66.118 | 97.577  |
| 6 | 0.7823 | 12.562 | 10.822 | 8.380  | 59.763 | 90.972  |
| 6 | 0.7833 | 22.309 | 22.736 | 17.214 | 60.987 | 106.154 |
| 6 | 0.7843 | 13.816 | 17.164 | 12.551 | 46.860 | 82.993  |
| 6 | 0.7853 | 16.468 | 7.390  | 7.362  | 37.136 | 92.532  |
| 6 | 0.7863 | 26.012 | 25.643 | 20.652 | 47.523 | 80.634  |
| 6 | 0.7873 | 21.998 | 17.147 | 10.919 | 50.951 | 73.539  |
| 6 | 0.7883 | 16.002 | 17.945 | 10.296 | 53.859 | 69.124  |
| 6 | 0.7893 | 12.386 | 10.944 | 7.614  | 24.264 | 57.444  |
| 6 | 0.7903 | 15.477 | 8.491  | 4.097  | 41.371 | 84.479  |
| 6 | 0.7913 | 10.745 | 4.520  | 3.097  | 51.242 | 99.305  |
| 6 | 0.7923 | 13.873 | 6.337  | 12.237 | 37.014 | 63.294  |
| 6 | 0.7933 | 12.001 | 13.417 | 15.713 | 41.019 | 45.111  |
| 6 | 0.7943 | 23.457 | 17.617 | 25.676 | 36.479 | 67.901  |
| 6 | 0.7953 | 12.381 | 16.769 | 13.021 | 34.804 | 78.602  |
| 6 | 0.7963 | 16.300 | 10.171 | 8.820  | 62.493 | 121.153 |
| 6 | 0.7973 | 13.064 | 9.469  | 8.076  | 47.888 | 80.877  |
| 6 | 0.7983 | 16.795 | 21.781 | 13.711 | 31.328 | 54.743  |
| 6 | 0.7993 | 13.012 | 13.445 | 8.590  | 21.639 | 69.407  |
| 6 | 0.8003 | 6.150  | 13.804 | 11.274 | 24.176 | 51.864  |
| 6 | 0.8013 | 2.387  | 3.989  | 3.890  | 10.206 | 19.563  |
| 6 | 0.8023 | 14.891 | 7.651  | 11.705 | 5.919  | 32.815  |
| 6 | 0.8033 | 31.911 | 20.773 | 28.526 | 36.552 | 92.361  |
| 6 | 0.8043 | 20.639 | 12.534 | 19.817 | 41.546 | 88.402  |

|   |        |        |        |        |        |         |
|---|--------|--------|--------|--------|--------|---------|
| 6 | 0.8053 | 18.389 | 7.709  | 13.772 | 48.319 | 118.122 |
| 6 | 0.8063 | 8.729  | 11.100 | 12.355 | 14.546 | 32.653  |
| 6 | 0.8073 | 22.236 | 21.640 | 26.851 | 32.177 | 54.041  |
| 6 | 0.8083 | 9.609  | 21.244 | 21.552 | 64.638 | 66.159  |
| 6 | 0.8093 | 5.809  | 6.246  | 5.256  | 21.369 | 45.071  |
| 6 | 0.8103 | 10.397 | 9.405  | 11.239 | 16.195 | 41.523  |
| 6 | 0.8113 | 15.739 | 13.928 | 19.776 | 45.534 | 122.294 |
| 6 | 0.8123 | 5.786  | 12.310 | 13.015 | 27.815 | 85.654  |
| 6 | 0.8133 | 12.166 | 13.883 | 15.486 | 46.081 | 155.554 |
| 6 | 0.8143 | 14.748 | 14.974 | 10.227 | 57.909 | 121.865 |
| 6 | 0.8153 | 18.372 | 20.949 | 13.598 | 45.026 | 119.233 |
| 6 | 0.8163 | 28.431 | 14.278 | 22.868 | 34.919 | 114.617 |
| 6 | 0.8173 | 27.142 | 6.039  | 10.288 | 37.979 | 116.383 |
| 6 | 0.8183 | 20.427 | 11.151 | 14.235 | 29.057 | 79.863  |
| 6 | 0.8193 | 15.592 | 12.704 | 10.389 | 32.410 | 78.328  |
| 6 | 0.8203 | 11.391 | 15.019 | 13.391 | 58.587 | 138.793 |
| 6 | 0.8213 | 8.815  | 13.160 | 16.961 | 24.080 | 54.918  |
| 6 | 0.8223 | 12.914 | 10.925 | 13.665 | 36.880 | 103.048 |
| 6 | 0.8233 | 17.683 | 11.831 | 12.917 | 27.801 | 103.296 |
| 6 | 0.8243 | 29.438 | 16.429 | 20.568 | 35.044 | 152.850 |
| 6 | 0.8253 | 29.635 | 16.527 | 20.630 | 34.973 | 153.107 |
| 6 | 0.8263 | 17.265 | 15.558 | 16.495 | 62.899 | 181.669 |
| 6 | 0.8273 | 6.996  | 9.499  | 12.541 | 75.311 | 224.735 |
| 6 | 0.8283 | 4.613  | 3.004  | 3.901  | 20.652 | 66.276  |
| 6 | 0.8293 | 18.636 | 12.683 | 20.365 | 25.785 | 86.417  |
| 6 | 0.8303 | 16.579 | 15.935 | 17.335 | 27.194 | 60.277  |
| 6 | 0.8313 | 14.426 | 7.504  | 10.787 | 26.798 | 72.541  |
| 6 | 0.8323 | 19.150 | 8.410  | 14.731 | 31.784 | 88.330  |
| 6 | 0.8333 | 14.948 | 19.475 | 10.917 | 37.262 | 90.507  |
| 6 | 0.8343 | 17.113 | 18.594 | 11.441 | 41.539 | 78.626  |
| 6 | 0.8353 | 17.878 | 10.567 | 5.824  | 37.016 | 91.754  |
| 6 | 0.8363 | 10.251 | 22.563 | 17.806 | 24.919 | 60.237  |
| 6 | 0.8373 | 8.833  | 17.722 | 22.304 | 36.114 | 45.271  |
| 6 | 0.8383 | 11.717 | 14.717 | 12.268 | 24.470 | 55.976  |
| 6 | 0.8393 | 11.728 | 14.718 | 11.785 | 24.295 | 56.306  |
| 6 | 0.8403 | 23.072 | 13.056 | 11.595 | 24.550 | 66.367  |
| 6 | 0.8413 | 17.609 | 17.184 | 13.804 | 23.875 | 32.013  |
| 6 | 0.8423 | 15.205 | 19.276 | 27.731 | 39.084 | 93.139  |
| 6 | 0.8433 | 27.153 | 29.595 | 28.421 | 23.045 | 57.377  |
| 6 | 0.8443 | 10.896 | 17.960 | 11.741 | 50.911 | 93.675  |
| 6 | 0.8453 | 3.977  | 13.793 | 9.832  | 37.909 | 65.705  |
| 6 | 0.8463 | 6.595  | 11.237 | 9.469  | 37.903 | 82.710  |
| 6 | 0.8473 | 17.019 | 25.017 | 21.372 | 29.906 | 39.759  |
| 6 | 0.8483 | 18.665 | 20.904 | 16.694 | 45.120 | 93.465  |
| 6 | 0.8493 | 20.842 | 19.371 | 17.096 | 24.731 | 61.036  |
| 6 | 0.8503 | 21.809 | 12.246 | 11.791 | 38.858 | 66.115  |
| 6 | 0.8513 | 20.875 | 3.881  | 15.321 | 39.980 | 102.953 |
| 6 | 0.8523 | 17.513 | 5.943  | 8.090  | 34.237 | 96.324  |
| 6 | 0.8533 | 19.382 | 5.110  | 12.838 | 42.309 | 90.001  |
| 6 | 0.8543 | 18.685 | 12.966 | 10.332 | 13.606 | 20.628  |

|   |        |        |        |        |        |         |
|---|--------|--------|--------|--------|--------|---------|
| 6 | 0.8553 | 10.060 | 14.319 | 12.406 | 10.716 | 15.351  |
| 6 | 0.8563 | 5.958  | 12.834 | 10.898 | 15.087 | 16.883  |
| 6 | 0.8573 | 34.112 | 18.480 | 25.984 | 36.942 | 100.631 |
| 6 | 0.8583 | 14.800 | 11.500 | 7.176  | 38.341 | 99.431  |
| 6 | 0.8593 | 14.947 | 12.373 | 9.543  | 31.839 | 66.970  |
| 6 | 0.8603 | 13.417 | 12.269 | 9.218  | 19.072 | 25.912  |
| 6 | 0.8613 | 15.853 | 12.059 | 12.919 | 21.445 | 35.673  |
| 6 | 0.8623 | 8.781  | 8.017  | 7.732  | 28.707 | 45.740  |
| 6 | 0.8633 | 15.206 | 14.208 | 10.417 | 12.309 | 45.304  |
| 6 | 0.8643 | 13.769 | 6.090  | 5.335  | 20.406 | 62.987  |
| 6 | 0.8653 | 20.291 | 11.695 | 8.386  | 29.524 | 50.273  |
| 6 | 0.8663 | 17.983 | 22.321 | 17.875 | 31.326 | 60.562  |
| 6 | 0.8673 | 15.437 | 18.508 | 11.448 | 38.870 | 67.087  |
| 6 | 0.8683 | 18.101 | 14.070 | 11.683 | 38.617 | 75.318  |
| 6 | 0.8693 | 17.465 | 9.280  | 11.186 | 33.488 | 80.069  |
| 6 | 0.8703 | 26.114 | 12.959 | 15.741 | 49.926 | 76.860  |
| 6 | 0.8713 | 21.970 | 13.843 | 16.389 | 30.749 | 49.897  |
| 6 | 0.8723 | 15.575 | 11.434 | 14.160 | 20.469 | 34.063  |
| 6 | 0.8733 | 19.486 | 23.096 | 14.712 | 20.342 | 30.656  |
| 6 | 0.8743 | 9.498  | 6.620  | 4.661  | 15.971 | 49.422  |
| 6 | 0.8753 | 26.006 | 10.249 | 8.793  | 35.491 | 73.996  |
| 6 | 0.8763 | 26.535 | 10.466 | 9.354  | 37.919 | 73.467  |
| 6 | 0.8773 | 34.680 | 22.318 | 13.695 | 32.253 | 74.453  |
| 6 | 0.8783 | 20.154 | 7.527  | 6.563  | 32.634 | 66.570  |
| 6 | 0.8793 | 9.592  | 7.997  | 7.860  | 31.218 | 60.674  |
| 6 | 0.8803 | 26.946 | 18.551 | 12.618 | 36.372 | 64.910  |
| 6 | 0.8813 | 11.079 | 15.149 | 6.857  | 11.828 | 13.123  |
| 6 | 0.8823 | 10.621 | 14.570 | 7.774  | 26.237 | 20.871  |
| 6 | 0.8833 | 17.125 | 15.701 | 16.795 | 24.583 | 23.567  |
| 6 | 0.8843 | 18.830 | 9.153  | 6.944  | 49.733 | 80.694  |
| 6 | 0.8853 | 10.845 | 11.619 | 8.777  | 40.211 | 73.098  |
| 6 | 0.8863 | 18.162 | 8.897  | 7.579  | 28.690 | 46.652  |
| 6 | 0.8873 | 24.629 | 21.710 | 17.618 | 28.681 | 32.883  |
| 6 | 0.8883 | 15.513 | 9.928  | 11.304 | 21.299 | 51.296  |
| 6 | 0.8893 | 24.035 | 17.641 | 15.765 | 32.529 | 69.154  |
| 6 | 0.8903 | 32.851 | 17.813 | 11.415 | 52.495 | 111.687 |
| 6 | 0.8913 | 26.516 | 12.206 | 10.890 | 30.058 | 72.169  |
| 6 | 0.8923 | 9.764  | 7.083  | 6.683  | 18.386 | 35.322  |
| 6 | 0.8933 | 16.596 | 9.373  | 6.881  | 31.538 | 51.637  |
| 6 | 0.8943 | 20.566 | 9.728  | 6.649  | 19.941 | 53.461  |
| 6 | 0.8953 | 22.855 | 9.682  | 6.855  | 28.144 | 72.009  |
| 6 | 0.8963 | 11.078 | 3.613  | 3.712  | 15.185 | 29.215  |
| 6 | 0.8973 | 19.268 | 12.780 | 12.095 | 21.046 | 42.551  |
| 6 | 0.8983 | 48.149 | 34.920 | 29.779 | 38.085 | 96.548  |
| 6 | 0.8993 | 17.898 | 17.890 | 15.762 | 33.989 | 44.040  |
| 6 | 0.9003 | 17.940 | 17.728 | 15.719 | 33.677 | 44.022  |
| 6 | 0.9013 | 20.126 | 6.754  | 8.587  | 23.701 | 52.278  |
| 6 | 0.9023 | 29.335 | 14.500 | 11.494 | 43.715 | 77.793  |
| 6 | 0.9033 | 20.078 | 14.317 | 11.268 | 32.807 | 67.512  |
| 6 | 0.9043 | 23.062 | 15.587 | 12.364 | 31.318 | 64.293  |

|   |        |        |        |        |        |        |
|---|--------|--------|--------|--------|--------|--------|
| 6 | 0.9053 | 31.559 | 16.325 | 13.374 | 19.591 | 72.044 |
| 6 | 0.9063 | 20.452 | 14.423 | 10.895 | 25.979 | 54.885 |
| 6 | 0.9073 | 20.472 | 11.631 | 7.415  | 18.236 | 53.400 |
| 6 | 0.9083 | 22.020 | 10.468 | 10.458 | 28.900 | 56.024 |
| 6 | 0.9093 | 22.709 | 4.709  | 8.225  | 40.866 | 62.838 |
| 6 | 0.9103 | 22.753 | 10.201 | 9.089  | 38.960 | 72.855 |
| 6 | 0.9113 | 20.203 | 9.624  | 9.768  | 20.454 | 49.518 |
| 6 | 0.9123 | 16.791 | 10.641 | 8.447  | 32.148 | 50.694 |
| 6 | 0.9133 | 21.499 | 11.603 | 11.608 | 25.453 | 66.043 |
| 6 | 0.9143 | 14.606 | 13.341 | 10.256 | 23.299 | 53.743 |
| 6 | 0.9153 | 23.189 | 11.996 | 10.505 | 27.505 | 73.155 |
| 6 | 0.9163 | 30.771 | 23.933 | 23.956 | 14.393 | 26.141 |
| 6 | 0.9173 | 13.506 | 10.669 | 7.512  | 23.982 | 44.369 |
| 6 | 0.9183 | 12.887 | 12.615 | 10.138 | 25.836 | 48.959 |
| 6 | 0.9193 | 22.897 | 11.877 | 9.318  | 30.775 | 61.972 |
| 6 | 0.9203 | 18.417 | 6.743  | 9.400  | 23.078 | 40.299 |
| 6 | 0.9213 | 22.299 | 14.109 | 12.476 | 36.616 | 60.750 |
| 6 | 0.9223 | 30.375 | 22.801 | 20.327 | 28.191 | 65.756 |
| 6 | 0.9233 | 20.011 | 13.235 | 6.433  | 22.239 | 63.159 |
| 6 | 0.9243 | 18.320 | 9.447  | 6.762  | 26.659 | 60.236 |
| 6 | 0.9253 | 17.375 | 11.712 | 7.639  | 25.195 | 52.597 |
| 6 | 0.9263 | 25.865 | 7.659  | 15.129 | 36.387 | 70.511 |
| 6 | 0.9273 | 14.489 | 8.406  | 6.840  | 17.355 | 45.681 |
| 6 | 0.9283 | 17.561 | 7.986  | 4.280  | 19.070 | 60.611 |
| 6 | 0.9293 | 15.484 | 12.267 | 6.207  | 22.474 | 52.274 |
| 6 | 0.9303 | 28.968 | 17.400 | 14.367 | 26.947 | 68.286 |
| 6 | 0.9313 | 18.086 | 11.873 | 6.245  | 29.496 | 71.402 |
| 6 | 0.9323 | 20.996 | 8.006  | 7.482  | 27.775 | 58.493 |
| 6 | 0.9333 | 15.130 | 12.394 | 6.677  | 25.204 | 50.318 |
| 6 | 0.9343 | 16.674 | 12.647 | 5.487  | 20.908 | 60.730 |
| 6 | 0.9353 | 12.403 | 13.528 | 6.669  | 24.886 | 54.496 |
| 6 | 0.9363 | 6.542  | 9.419  | 4.913  | 28.162 | 28.001 |
| 6 | 0.9373 | 21.372 | 16.626 | 15.850 | 29.207 | 36.573 |
| 6 | 0.9383 | 17.500 | 16.462 | 7.810  | 25.326 | 46.776 |
| 6 | 0.9393 | 24.556 | 14.739 | 12.985 | 41.443 | 47.480 |
| 6 | 0.9403 | 23.634 | 10.405 | 14.804 | 32.483 | 33.363 |
| 6 | 0.9413 | 12.991 | 13.155 | 8.255  | 25.309 | 40.479 |
| 6 | 0.9423 | 10.435 | 7.240  | 8.256  | 40.945 | 35.293 |
| 6 | 0.9433 | 17.785 | 6.567  | 8.154  | 40.060 | 57.646 |
| 6 | 0.9443 | 10.621 | 8.764  | 7.154  | 27.057 | 44.142 |
| 6 | 0.9453 | 7.396  | 7.227  | 4.833  | 12.390 | 32.851 |
| 6 | 0.9463 | 4.218  | 2.525  | 3.273  | 7.764  | 22.440 |
| 6 | 0.9473 | 14.775 | 10.883 | 8.494  | 19.860 | 33.985 |
| 6 | 0.9483 | 25.705 | 9.822  | 13.868 | 14.263 | 38.772 |
| 6 | 0.9493 | 25.758 | 9.758  | 13.956 | 14.073 | 38.766 |
| 6 | 0.9503 | 13.105 | 8.469  | 10.831 | 24.615 | 38.108 |
| 6 | 0.9513 | 20.658 | 15.182 | 15.054 | 29.486 | 41.901 |
| 6 | 0.9523 | 14.767 | 15.360 | 11.346 | 22.925 | 44.562 |
| 6 | 0.9533 | 12.956 | 14.151 | 11.431 | 17.513 | 25.094 |
| 6 | 0.9543 | 19.328 | 13.608 | 8.530  | 14.422 | 26.199 |



|   |        |        |        |        |        |        |
|---|--------|--------|--------|--------|--------|--------|
| 6 | 0.9553 | 15.794 | 11.566 | 10.258 | 13.435 | 34.217 |
| 6 | 0.9563 | 8.690  | 9.545  | 8.755  | 11.896 | 31.106 |
| 6 | 0.9573 | 18.627 | 15.181 | 16.449 | 8.543  | 32.818 |
| 6 | 0.9583 | 23.245 | 19.795 | 17.767 | 29.546 | 47.386 |
| 6 | 0.9593 | 12.385 | 10.290 | 11.131 | 14.626 | 28.719 |
| 6 | 0.9603 | 13.736 | 12.070 | 10.820 | 11.855 | 31.497 |
| 6 | 0.9613 | 16.155 | 12.674 | 8.440  | 19.549 | 52.794 |
| 6 | 0.9623 | 22.447 | 20.196 | 13.489 | 24.896 | 57.188 |
| 6 | 0.9633 | 26.284 | 19.091 | 14.788 | 27.252 | 56.094 |
| 6 | 0.9643 | 4.671  | 7.599  | 5.952  | 19.540 | 19.661 |
| 6 | 0.9653 | 13.343 | 15.495 | 8.532  | 18.222 | 23.663 |
| 6 | 0.9663 | 26.998 | 26.447 | 22.153 | 13.717 | 30.595 |
| 6 | 0.9673 | 22.596 | 22.526 | 19.690 | 11.956 | 23.804 |
| 6 | 0.9683 | 22.452 | 22.447 | 19.444 | 12.021 | 23.195 |
| 6 | 0.9693 | 12.683 | 6.424  | 6.493  | 9.583  | 25.100 |
| 6 | 0.9703 | 19.567 | 21.493 | 17.865 | 25.274 | 52.672 |
| 6 | 0.9713 | 34.518 | 18.793 | 22.424 | 29.588 | 37.905 |
| 6 | 0.9723 | 25.847 | 14.622 | 17.226 | 19.790 | 34.733 |
| 6 | 0.9733 | 32.922 | 11.010 | 21.575 | 25.662 | 37.169 |
| 6 | 0.9743 | 15.234 | 15.868 | 15.756 | 9.814  | 25.312 |
| 6 | 0.9753 | 21.812 | 19.772 | 10.336 | 15.297 | 17.170 |
| 6 | 0.9763 | 7.754  | 11.142 | 6.505  | 15.199 | 32.559 |
| 6 | 0.9773 | 25.835 | 19.283 | 14.866 | 19.090 | 38.485 |
| 6 | 0.9783 | 25.157 | 22.944 | 17.062 | 24.456 | 32.073 |
| 6 | 0.9793 | 10.480 | 13.986 | 7.681  | 20.475 | 22.269 |
| 6 | 0.9803 | 14.543 | 11.099 | 7.012  | 24.043 | 30.723 |
| 6 | 0.9813 | 37.326 | 27.276 | 24.861 | 22.685 | 28.444 |
| 6 | 0.9823 | 34.647 | 17.139 | 21.924 | 18.308 | 38.211 |
| 6 | 0.9833 | 32.834 | 28.175 | 24.106 | 23.761 | 36.758 |
| 6 | 0.9843 | 8.333  | 5.272  | 8.347  | 17.113 | 23.546 |
| 6 | 0.9853 | 22.227 | 14.171 | 17.885 | 10.232 | 23.342 |
| 6 | 0.9863 | 16.360 | 9.787  | 10.897 | 21.204 | 37.044 |
| 6 | 0.9873 | 19.994 | 10.890 | 17.333 | 21.200 | 27.538 |
| 6 | 0.9883 | 31.414 | 29.427 | 26.729 | 13.736 | 25.869 |
| 6 | 0.9893 | 15.404 | 17.712 | 17.622 | 17.352 | 28.234 |
| 6 | 0.9903 | 13.719 | 16.440 | 15.923 | 17.263 | 32.033 |
| 6 | 0.9913 | 17.409 | 19.464 | 17.835 | 18.576 | 26.194 |
| 6 | 0.9923 | 16.523 | 13.800 | 9.617  | 10.036 | 26.764 |
| 6 | 0.9933 | 12.755 | 16.241 | 10.383 | 8.072  | 20.992 |
| 6 | 0.9943 | 2.094  | 6.759  | 3.408  | 5.719  | 12.530 |
| 6 | 0.9953 | 19.879 | 13.527 | 8.772  | 13.602 | 28.113 |
| 6 | 0.9963 | 14.287 | 11.347 | 9.090  | 14.464 | 16.509 |
| 6 | 0.9973 | 13.590 | 18.306 | 10.602 | 23.045 | 29.982 |
| 6 | 0.9983 | 19.646 | 14.133 | 14.779 | 15.446 | 33.636 |
| 6 | 0.9993 | 19.887 | 26.776 | 23.708 | 17.316 | 32.899 |
| 6 | 1.0003 | 10.294 | 16.613 | 14.371 | 19.784 | 33.882 |
| 6 | 1.0013 | 12.822 | 18.375 | 18.529 | 13.388 | 28.864 |
| 6 | 1.0023 | 12.810 | 18.415 | 18.604 | 13.789 | 28.547 |
| 6 | 1.0033 | 27.771 | 31.195 | 22.106 | 18.049 | 32.945 |
| 6 | 1.0043 | 22.980 | 25.874 | 19.838 | 30.016 | 38.158 |

|   |        |        |        |        |        |        |
|---|--------|--------|--------|--------|--------|--------|
| 6 | 1.0053 | 18.927 | 17.410 | 14.684 | 30.451 | 33.283 |
| 6 | 1.0063 | 21.561 | 21.072 | 13.691 | 24.952 | 37.507 |
| 6 | 1.0073 | 35.438 | 22.657 | 20.303 | 22.786 | 42.664 |
| 6 | 1.0083 | 27.711 | 20.297 | 20.828 | 18.365 | 35.837 |
| 6 | 1.0093 | 15.465 | 24.536 | 11.833 | 19.568 | 18.034 |
| 6 | 1.0103 | 6.365  | 5.112  | 8.286  | 20.595 | 18.845 |
| 6 | 1.0113 | 10.448 | 15.793 | 6.770  | 23.916 | 25.425 |
| 6 | 1.0123 | 32.036 | 21.144 | 19.407 | 8.983  | 31.228 |
| 6 | 1.0133 | 17.547 | 17.773 | 14.922 | 27.671 | 27.687 |
| 6 | 1.0143 | 18.814 | 16.690 | 13.808 | 17.621 | 22.253 |
| 6 | 1.0153 | 16.757 | 22.711 | 11.988 | 24.095 | 32.134 |
| 6 | 1.0163 | 20.168 | 18.971 | 20.966 | 14.563 | 24.765 |
| 6 | 1.0173 | 24.678 | 22.558 | 19.156 | 17.117 | 25.479 |
| 6 | 1.0183 | 19.514 | 13.891 | 16.278 | 19.373 | 25.261 |
| 6 | 1.0193 | 12.532 | 11.699 | 9.189  | 22.684 | 28.960 |
| 6 | 1.0203 | 18.461 | 18.342 | 11.364 | 26.364 | 36.150 |
| 6 | 1.0213 | 22.348 | 21.938 | 13.137 | 29.984 | 35.826 |
| 6 | 1.0223 | 28.782 | 19.589 | 18.964 | 31.721 | 39.658 |
| 6 | 1.0233 | 22.848 | 14.361 | 16.083 | 18.701 | 29.231 |
| 6 | 1.0243 | 18.443 | 13.775 | 18.723 | 16.190 | 15.455 |
| 6 | 1.0253 | 21.578 | 18.566 | 16.515 | 22.102 | 14.455 |
| 6 | 1.0263 | 20.858 | 18.246 | 15.864 | 22.197 | 15.874 |
| 6 | 1.0273 | 23.809 | 14.546 | 16.582 | 15.606 | 25.804 |
| 6 | 1.0283 | 23.577 | 14.352 | 16.541 | 15.570 | 25.773 |
| 6 | 1.0293 | 18.566 | 12.871 | 19.530 | 11.904 | 14.531 |
| 6 | 1.0303 | 17.586 | 12.417 | 13.446 | 15.118 | 14.721 |
| 6 | 1.0313 | 17.844 | 19.023 | 12.604 | 8.814  | 15.165 |
| 6 | 1.0323 | 19.476 | 15.533 | 13.215 | 11.591 | 19.449 |
| 6 | 1.0333 | 13.260 | 18.326 | 11.640 | 7.833  | 21.213 |
| 6 | 1.0343 | 20.171 | 21.431 | 15.893 | 17.511 | 27.181 |
| 6 | 1.0353 | 11.345 | 10.124 | 9.251  | 12.396 | 13.093 |
| 6 | 1.0363 | 9.399  | 16.545 | 10.952 | 26.158 | 15.607 |
| 6 | 1.0373 | 16.610 | 21.583 | 20.276 | 15.806 | 15.455 |
| 6 | 1.0383 | 17.686 | 19.974 | 18.828 | 18.224 | 19.431 |
| 6 | 1.0393 | 23.178 | 25.527 | 26.138 | 18.915 | 29.894 |
| 6 | 1.0403 | 15.347 | 19.993 | 17.817 | 11.672 | 22.826 |
| 6 | 1.0413 | 17.698 | 28.262 | 15.768 | 10.382 | 29.823 |
| 6 | 1.0423 | 21.686 | 23.074 | 23.014 | 18.489 | 32.519 |
| 6 | 1.0433 | 9.003  | 5.105  | 8.506  | 14.214 | 21.333 |
| 6 | 1.0443 | 14.208 | 21.156 | 20.861 | 29.798 | 17.627 |
| 6 | 1.0453 | 17.396 | 19.522 | 17.790 | 24.253 | 27.489 |
| 6 | 1.0463 | 10.346 | 7.783  | 12.816 | 5.962  | 28.765 |
| 6 | 1.0473 | 13.513 | 15.806 | 18.609 | 13.462 | 31.669 |
| 6 | 1.0483 | 10.942 | 13.237 | 16.541 | 15.876 | 18.582 |
| 6 | 1.0493 | 8.875  | 10.293 | 12.126 | 24.351 | 22.614 |
| 6 | 1.0503 | 22.667 | 17.105 | 24.515 | 21.109 | 29.573 |
| 6 | 1.0513 | 11.012 | 14.195 | 15.170 | 18.181 | 18.228 |
| 6 | 1.0523 | 9.233  | 12.944 | 14.434 | 15.620 | 26.362 |
| 6 | 1.0533 | 17.882 | 16.207 | 19.858 | 8.464  | 26.936 |
| 6 | 1.0543 | 17.282 | 17.659 | 21.309 | 30.082 | 29.189 |

|   |        |        |        |        |        |        |
|---|--------|--------|--------|--------|--------|--------|
| 6 | 1.0553 | 9.771  | 9.860  | 18.589 | 14.284 | 21.777 |
| 6 | 1.0563 | 18.289 | 9.648  | 21.542 | 10.641 | 17.387 |
| 6 | 1.0573 | 19.288 | 13.353 | 27.527 | 8.076  | 19.509 |
| 6 | 1.0583 | 22.902 | 21.559 | 22.364 | 12.610 | 16.381 |
| 6 | 1.0593 | 13.693 | 11.281 | 12.837 | 11.396 | 27.383 |
| 6 | 1.0603 | 13.270 | 8.518  | 14.124 | 11.426 | 31.170 |
| 6 | 1.0613 | 21.767 | 15.206 | 18.693 | 6.914  | 21.326 |
| 6 | 1.0623 | 7.685  | 8.108  | 13.302 | 8.591  | 9.028  |
| 6 | 1.0633 | 17.271 | 11.816 | 17.449 | 12.223 | 28.855 |
| 6 | 1.0643 | 12.385 | 8.417  | 14.820 | 12.033 | 22.222 |
| 6 | 1.0653 | 7.404  | 4.617  | 9.093  | 9.601  | 14.871 |
| 6 | 1.0663 | 4.790  | 3.151  | 4.532  | 13.766 | 14.464 |
| 6 | 1.0673 | 3.884  | 7.449  | 9.222  | 18.743 | 13.240 |
| 6 | 1.0683 | 3.438  | 12.869 | 6.966  | 12.047 | 11.367 |
| 6 | 1.0693 | 12.930 | 12.139 | 21.348 | 12.327 | 12.902 |
| 6 | 1.0703 | 10.935 | 10.348 | 13.999 | 8.960  | 9.978  |
| 6 | 1.0713 | 12.300 | 13.949 | 14.732 | 15.536 | 17.013 |
| 6 | 1.0723 | 8.858  | 11.517 | 12.912 | 20.989 | 18.574 |
| 6 | 1.0733 | 16.325 | 16.085 | 18.081 | 12.245 | 23.472 |
| 6 | 1.0743 | 12.419 | 9.642  | 9.539  | 13.521 | 16.839 |
| 6 | 1.0753 | 12.023 | 5.404  | 7.848  | 24.953 | 24.410 |
| 6 | 1.0763 | 13.177 | 11.660 | 14.129 | 14.165 | 15.217 |
| 6 | 1.0773 | 17.344 | 17.552 | 21.242 | 5.898  | 11.391 |
| 6 | 1.0783 | 13.809 | 9.375  | 8.481  | 30.233 | 20.940 |
| 6 | 1.0793 | 20.215 | 22.635 | 15.373 | 32.270 | 23.278 |
| 6 | 1.0803 | 9.525  | 5.978  | 10.110 | 23.642 | 14.728 |
| 6 | 1.0813 | 13.933 | 12.331 | 13.819 | 34.478 | 15.613 |
| 6 | 1.0823 | 11.354 | 14.801 | 14.218 | 18.884 | 20.707 |
| 6 | 1.0833 | 4.648  | 9.776  | 10.326 | 16.612 | 18.064 |
| 6 | 1.0843 | 6.510  | 5.822  | 6.421  | 24.908 | 32.014 |
| 6 | 1.0853 | 28.903 | 14.627 | 24.683 | 13.067 | 20.682 |
| 6 | 1.0863 | 16.350 | 14.316 | 16.475 | 14.056 | 15.051 |
| 6 | 1.0873 | 13.397 | 10.909 | 14.160 | 24.184 | 15.691 |
| 6 | 1.0883 | 8.012  | 9.056  | 11.525 | 15.336 | 13.060 |
| 6 | 1.0893 | 11.431 | 8.856  | 14.072 | 14.287 | 23.006 |
| 6 | 1.0903 | 15.026 | 17.727 | 17.273 | 23.319 | 18.575 |
| 6 | 1.0913 | 15.007 | 16.086 | 19.236 | 15.893 | 14.394 |
| 6 | 1.0923 | 17.595 | 15.742 | 22.424 | 6.168  | 11.641 |
| 6 | 1.0933 | 20.900 | 19.325 | 20.463 | 14.656 | 15.173 |
| 6 | 1.0943 | 20.920 | 19.281 | 20.504 | 14.887 | 15.460 |
| 6 | 1.0953 | 11.256 | 14.841 | 15.976 | 12.311 | 17.932 |
| 6 | 1.0963 | 8.213  | 12.535 | 11.873 | 13.622 | 16.171 |
| 6 | 1.0973 | 6.333  | 7.239  | 11.060 | 13.010 | 27.613 |
| 6 | 1.0983 | 6.411  | 8.512  | 10.547 | 10.484 | 10.285 |
| 6 | 1.0993 | 9.585  | 8.203  | 11.233 | 6.134  | 14.087 |
| 6 | 1.1003 | 10.268 | 8.752  | 11.902 | 5.900  | 13.857 |
| 6 | 1.1013 | 8.499  | 12.835 | 14.902 | 15.807 | 15.355 |
| 6 | 1.1023 | 7.414  | 13.761 | 14.389 | 13.342 | 14.429 |
| 6 | 1.1033 | 12.771 | 22.163 | 18.420 | 15.224 | 14.951 |
| 6 | 1.1043 | 15.505 | 17.565 | 15.169 | 23.024 | 9.847  |

|   |        |        |        |        |        |        |
|---|--------|--------|--------|--------|--------|--------|
| 6 | 1.1053 | 7.673  | 8.657  | 9.401  | 12.052 | 10.920 |
| 6 | 1.1063 | 8.705  | 12.308 | 10.004 | 6.092  | 5.512  |
| 6 | 1.1073 | 17.436 | 19.682 | 19.529 | 16.442 | 13.325 |
| 6 | 1.1083 | 10.802 | 19.717 | 15.840 | 11.025 | 10.757 |
| 6 | 1.1093 | 14.956 | 22.094 | 22.109 | 13.707 | 10.809 |
| 6 | 1.1103 | 15.654 | 21.051 | 21.299 | 13.117 | 7.977  |
| 6 | 1.1113 | 7.253  | 5.499  | 11.081 | 3.626  | 4.993  |
| 6 | 1.1123 | 7.445  | 9.740  | 12.257 | 12.073 | 5.220  |
| 6 | 1.1133 | 5.184  | 4.913  | 7.885  | 8.274  | 7.366  |
| 6 | 1.1143 | 10.265 | 13.356 | 18.269 | 11.167 | 8.027  |
| 6 | 1.1153 | 9.713  | 14.903 | 20.640 | 13.920 | 12.231 |
| 6 | 1.1163 | 7.427  | 15.043 | 20.402 | 18.936 | 11.783 |
| 6 | 1.1173 | 6.866  | 13.251 | 16.542 | 10.905 | 16.165 |
| 6 | 1.1183 | 13.620 | 16.083 | 22.882 | 4.177  | 14.885 |
| 6 | 1.1193 | 16.640 | 22.321 | 21.737 | 7.665  | 12.138 |
| 6 | 1.1203 | 8.798  | 10.608 | 11.515 | 12.269 | 7.720  |
| 6 | 1.1213 | 11.477 | 11.548 | 13.084 | 14.834 | 9.542  |
| 6 | 1.1223 | 10.999 | 10.128 | 13.489 | 14.105 | 9.501  |
| 6 | 1.1233 | 8.980  | 12.389 | 8.043  | 17.850 | 4.513  |
| 6 | 1.1243 | 7.401  | 7.386  | 11.112 | 10.452 | 11.154 |
| 6 | 1.1253 | 20.134 | 18.543 | 16.823 | 12.553 | 14.146 |
| 6 | 1.1263 | 15.303 | 20.483 | 21.733 | 23.408 | 17.440 |
| 6 | 1.1273 | 13.782 | 13.536 | 15.544 | 10.803 | 12.468 |
| 6 | 1.1283 | 13.091 | 11.863 | 13.624 | 10.696 | 12.488 |
| 6 | 1.1293 | 13.197 | 16.811 | 24.181 | 8.283  | 15.888 |
| 6 | 1.1303 | 11.693 | 18.575 | 17.726 | 15.661 | 11.307 |
| 6 | 1.1313 | 14.054 | 22.766 | 14.325 | 20.033 | 11.107 |
| 6 | 1.1323 | 16.128 | 22.375 | 24.257 | 22.769 | 16.687 |
| 6 | 1.1333 | 18.602 | 19.923 | 23.398 | 16.330 | 16.087 |
| 6 | 1.1343 | 12.413 | 11.261 | 13.580 | 9.933  | 14.059 |
| 6 | 1.1353 | 21.564 | 17.179 | 28.837 | 4.667  | 15.003 |
| 6 | 1.1363 | 22.109 | 18.849 | 25.514 | 10.312 | 14.089 |
| 6 | 1.1373 | 16.160 | 17.572 | 21.232 | 11.497 | 6.632  |
| 6 | 1.1383 | 21.969 | 26.433 | 22.991 | 15.568 | 14.206 |
| 6 | 1.1393 | 11.823 | 14.948 | 13.746 | 20.495 | 11.870 |
| 6 | 1.1403 | 22.242 | 22.267 | 23.477 | 21.281 | 12.379 |
| 6 | 1.1413 | 11.621 | 11.559 | 8.667  | 14.887 | 9.669  |
| 6 | 1.1423 | 7.440  | 9.692  | 7.001  | 15.743 | 10.313 |
| 6 | 1.1433 | 0.000  | 0.000  | 0.000  | 0.000  | 0.000  |
| 7 | 0.0002 | 0.000  | 0.000  | 0.000  | 0.000  | 0.000  |
| 7 | 0.0012 | 13.170 | 8.764  | 12.471 | 8.709  | 13.473 |
| 7 | 0.0022 | 12.478 | 12.725 | 11.756 | 8.979  | 14.982 |
| 7 | 0.0032 | 15.653 | 14.187 | 16.758 | 20.756 | 18.007 |
| 7 | 0.0042 | 16.940 | 17.235 | 14.431 | 15.308 | 35.299 |
| 7 | 0.0052 | 26.378 | 17.622 | 18.134 | 23.528 | 21.818 |
| 7 | 0.0062 | 15.166 | 12.399 | 8.579  | 9.876  | 25.507 |
| 7 | 0.0072 | 11.992 | 7.565  | 6.553  | 7.983  | 24.946 |
| 7 | 0.0082 | 13.272 | 18.740 | 15.948 | 7.591  | 20.081 |
| 7 | 0.0092 | 16.776 | 19.087 | 15.471 | 9.250  | 20.464 |
| 7 | 0.0102 | 14.580 | 16.763 | 17.558 | 7.675  | 16.608 |

|   |        |        |        |        |        |        |
|---|--------|--------|--------|--------|--------|--------|
| 7 | 0.0112 | 21.981 | 18.561 | 21.483 | 9.358  | 16.897 |
| 7 | 0.0122 | 13.380 | 17.684 | 15.742 | 13.826 | 19.102 |
| 7 | 0.0132 | 5.490  | 14.310 | 6.349  | 14.918 | 19.531 |
| 7 | 0.0142 | 11.635 | 19.869 | 9.688  | 12.903 | 12.626 |
| 7 | 0.0152 | 9.695  | 22.348 | 18.264 | 8.585  | 11.951 |
| 7 | 0.0162 | 14.614 | 21.468 | 14.749 | 9.895  | 15.540 |
| 7 | 0.0172 | 15.696 | 20.376 | 14.543 | 11.081 | 13.644 |
| 7 | 0.0182 | 10.775 | 19.516 | 13.525 | 13.292 | 11.534 |
| 7 | 0.0192 | 21.840 | 20.972 | 17.922 | 13.451 | 15.189 |
| 7 | 0.0202 | 11.081 | 16.616 | 14.120 | 12.267 | 9.893  |
| 7 | 0.0212 | 8.533  | 14.384 | 12.205 | 14.482 | 8.620  |
| 7 | 0.0222 | 13.054 | 17.627 | 19.148 | 17.351 | 25.936 |
| 7 | 0.0232 | 12.961 | 17.611 | 19.090 | 17.319 | 25.815 |
| 7 | 0.0242 | 15.185 | 17.639 | 15.477 | 17.487 | 20.583 |
| 7 | 0.0252 | 12.053 | 17.131 | 15.336 | 11.646 | 10.140 |
| 7 | 0.0262 | 32.838 | 21.056 | 22.061 | 17.980 | 16.022 |
| 7 | 0.0272 | 21.059 | 14.180 | 20.188 | 18.031 | 19.331 |
| 7 | 0.0282 | 17.892 | 16.268 | 16.640 | 11.047 | 18.481 |
| 7 | 0.0292 | 11.801 | 11.667 | 11.990 | 11.550 | 14.768 |
| 7 | 0.0302 | 11.584 | 15.587 | 14.681 | 17.403 | 15.339 |
| 7 | 0.0312 | 12.502 | 9.170  | 12.420 | 6.717  | 19.075 |
| 7 | 0.0322 | 26.359 | 26.136 | 36.941 | 11.569 | 15.061 |
| 7 | 0.0332 | 11.784 | 17.284 | 15.212 | 16.941 | 15.411 |
| 7 | 0.0342 | 17.543 | 13.952 | 17.110 | 8.629  | 12.239 |
| 7 | 0.0352 | 15.762 | 15.073 | 17.173 | 7.220  | 13.621 |
| 7 | 0.0362 | 15.928 | 20.208 | 17.260 | 12.265 | 20.695 |
| 7 | 0.0372 | 21.208 | 20.389 | 24.093 | 5.236  | 9.145  |
| 7 | 0.0382 | 18.391 | 19.193 | 21.177 | 9.373  | 6.431  |
| 7 | 0.0392 | 22.680 | 22.792 | 26.866 | 11.362 | 21.393 |
| 7 | 0.0402 | 11.203 | 12.750 | 16.403 | 8.798  | 18.806 |
| 7 | 0.0412 | 14.888 | 17.457 | 19.800 | 10.728 | 16.661 |
| 7 | 0.0422 | 7.476  | 11.435 | 11.383 | 6.532  | 7.297  |
| 7 | 0.0432 | 6.671  | 10.257 | 11.568 | 10.118 | 10.756 |
| 7 | 0.0442 | 7.527  | 15.391 | 12.873 | 10.974 | 7.824  |
| 7 | 0.0452 | 6.450  | 6.291  | 9.858  | 7.352  | 24.528 |
| 7 | 0.0462 | 16.674 | 12.020 | 22.941 | 14.548 | 18.281 |
| 7 | 0.0472 | 16.233 | 11.385 | 15.983 | 11.437 | 9.164  |
| 7 | 0.0482 | 13.868 | 11.734 | 15.978 | 3.671  | 4.283  |
| 7 | 0.0492 | 19.785 | 11.671 | 15.253 | 7.204  | 8.973  |
| 7 | 0.0502 | 12.514 | 10.436 | 11.969 | 6.791  | 8.126  |
| 7 | 0.0512 | 15.716 | 10.260 | 11.515 | 14.310 | 15.367 |
| 7 | 0.0522 | 16.045 | 19.402 | 19.359 | 22.330 | 11.644 |
| 7 | 0.0532 | 20.959 | 20.513 | 22.886 | 12.765 | 16.340 |
| 7 | 0.0542 | 12.912 | 13.381 | 15.335 | 14.144 | 9.760  |
| 7 | 0.0552 | 7.238  | 9.931  | 8.721  | 14.555 | 17.237 |
| 7 | 0.0562 | 6.518  | 7.499  | 6.865  | 22.153 | 14.044 |
| 7 | 0.0572 | 14.047 | 11.069 | 18.458 | 20.070 | 16.334 |
| 7 | 0.0582 | 17.741 | 11.744 | 15.957 | 18.162 | 13.773 |
| 7 | 0.0592 | 14.189 | 7.828  | 11.024 | 20.895 | 13.270 |
| 7 | 0.0602 | 4.167  | 4.103  | 2.880  | 10.881 | 6.120  |

|   |        |        |        |        |        |        |
|---|--------|--------|--------|--------|--------|--------|
| 7 | 0.0612 | 5.827  | 6.875  | 5.541  | 16.912 | 14.157 |
| 7 | 0.0622 | 12.315 | 9.077  | 8.540  | 25.126 | 14.190 |
| 7 | 0.0632 | 17.957 | 11.507 | 13.703 | 23.711 | 25.372 |
| 7 | 0.0642 | 11.359 | 13.657 | 13.404 | 17.839 | 13.793 |
| 7 | 0.0652 | 16.070 | 19.102 | 17.017 | 22.771 | 19.457 |
| 7 | 0.0662 | 12.919 | 15.539 | 15.110 | 27.176 | 26.561 |
| 7 | 0.0672 | 18.104 | 11.225 | 12.834 | 29.917 | 29.544 |
| 7 | 0.0682 | 37.084 | 25.597 | 24.660 | 30.757 | 18.962 |
| 7 | 0.0692 | 6.568  | 8.346  | 8.253  | 8.013  | 5.448  |
| 7 | 0.0702 | 29.863 | 17.951 | 24.607 | 28.949 | 12.901 |
| 7 | 0.0712 | 16.361 | 11.147 | 19.550 | 24.307 | 10.180 |
| 7 | 0.0722 | 19.294 | 12.491 | 24.699 | 13.753 | 7.755  |
| 7 | 0.0732 | 19.309 | 10.813 | 19.835 | 15.868 | 12.939 |
| 7 | 0.0742 | 18.486 | 17.588 | 22.758 | 21.688 | 5.407  |
| 7 | 0.0752 | 18.275 | 17.346 | 22.677 | 20.986 | 5.328  |
| 7 | 0.0762 | 18.828 | 10.750 | 14.737 | 29.036 | 5.330  |
| 7 | 0.0772 | 25.016 | 16.220 | 18.274 | 22.076 | 10.614 |
| 7 | 0.0782 | 28.337 | 18.273 | 18.940 | 35.452 | 24.834 |
| 7 | 0.0792 | 28.065 | 12.055 | 21.954 | 41.173 | 20.796 |
| 7 | 0.0802 | 17.637 | 17.416 | 18.539 | 19.944 | 16.794 |
| 7 | 0.0812 | 17.531 | 17.668 | 18.282 | 19.228 | 15.877 |
| 7 | 0.0822 | 11.449 | 10.665 | 13.725 | 11.916 | 6.270  |
| 7 | 0.0832 | 29.060 | 21.707 | 24.335 | 13.869 | 7.796  |
| 7 | 0.0842 | 7.443  | 9.839  | 9.306  | 5.449  | 4.931  |
| 7 | 0.0852 | 8.322  | 5.859  | 8.271  | 10.553 | 4.506  |
| 7 | 0.0862 | 24.286 | 14.147 | 33.272 | 20.741 | 15.179 |
| 7 | 0.0872 | 19.591 | 15.845 | 25.414 | 20.210 | 18.577 |
| 7 | 0.0882 | 25.233 | 15.018 | 23.067 | 21.699 | 14.185 |
| 7 | 0.0892 | 16.071 | 12.293 | 23.095 | 18.261 | 7.264  |
| 7 | 0.0902 | 17.041 | 27.924 | 28.847 | 30.681 | 7.264  |
| 7 | 0.0912 | 25.546 | 14.391 | 33.463 | 21.650 | 12.239 |
| 7 | 0.0922 | 15.983 | 13.157 | 23.039 | 9.477  | 8.901  |
| 7 | 0.0932 | 18.489 | 15.543 | 17.923 | 16.472 | 6.637  |
| 7 | 0.0942 | 6.313  | 8.089  | 3.326  | 13.091 | 12.758 |
| 7 | 0.0952 | 18.461 | 18.947 | 21.252 | 15.522 | 12.561 |
| 7 | 0.0962 | 18.355 | 18.675 | 21.107 | 15.269 | 12.556 |
| 7 | 0.0972 | 12.070 | 7.882  | 12.688 | 13.557 | 7.110  |
| 7 | 0.0982 | 14.764 | 12.196 | 12.762 | 22.375 | 10.884 |
| 7 | 0.0992 | 10.324 | 15.583 | 11.991 | 16.812 | 12.550 |
| 7 | 0.1002 | 20.928 | 15.954 | 25.862 | 20.135 | 8.081  |
| 7 | 0.1012 | 30.586 | 29.075 | 34.492 | 5.856  | 7.391  |
| 7 | 0.1022 | 18.281 | 17.052 | 19.762 | 13.585 | 14.236 |
| 7 | 0.1032 | 6.807  | 10.417 | 6.365  | 15.125 | 10.054 |
| 7 | 0.1042 | 6.789  | 8.428  | 6.202  | 8.883  | 12.807 |
| 7 | 0.1052 | 10.472 | 8.860  | 8.604  | 7.060  | 9.581  |
| 7 | 0.1062 | 8.337  | 9.342  | 8.011  | 10.886 | 9.896  |
| 7 | 0.1072 | 6.008  | 7.995  | 9.595  | 16.301 | 20.760 |
| 7 | 0.1082 | 12.095 | 8.789  | 17.679 | 14.029 | 9.396  |
| 7 | 0.1092 | 12.093 | 8.776  | 17.635 | 14.060 | 9.518  |
| 7 | 0.1102 | 17.575 | 14.837 | 17.635 | 10.245 | 17.926 |

|   |        |        |        |        |        |        |
|---|--------|--------|--------|--------|--------|--------|
| 7 | 0.1112 | 21.493 | 23.052 | 29.808 | 16.591 | 14.118 |
| 7 | 0.1122 | 9.808  | 10.519 | 10.424 | 16.732 | 17.462 |
| 7 | 0.1132 | 8.408  | 7.768  | 6.257  | 9.404  | 6.150  |
| 7 | 0.1142 | 20.962 | 12.177 | 23.143 | 11.316 | 16.053 |
| 7 | 0.1152 | 24.307 | 17.813 | 21.990 | 17.866 | 16.302 |
| 7 | 0.1162 | 14.019 | 17.314 | 12.368 | 16.482 | 16.988 |
| 7 | 0.1172 | 34.858 | 28.140 | 30.662 | 26.768 | 17.627 |
| 7 | 0.1182 | 13.775 | 17.703 | 16.387 | 11.799 | 9.240  |
| 7 | 0.1192 | 13.741 | 17.641 | 16.340 | 11.764 | 9.188  |
| 7 | 0.1202 | 7.294  | 11.918 | 7.297  | 15.011 | 11.190 |
| 7 | 0.1212 | 7.284  | 11.917 | 7.275  | 14.977 | 11.135 |
| 7 | 0.1222 | 9.533  | 9.005  | 10.448 | 14.335 | 14.275 |
| 7 | 0.1232 | 14.717 | 7.943  | 9.357  | 12.818 | 11.961 |
| 7 | 0.1242 | 20.098 | 12.060 | 15.793 | 14.845 | 13.342 |
| 7 | 0.1252 | 16.455 | 12.171 | 19.359 | 14.662 | 9.840  |
| 7 | 0.1262 | 28.705 | 18.352 | 26.663 | 14.199 | 14.321 |
| 7 | 0.1272 | 22.197 | 20.063 | 21.297 | 13.676 | 10.489 |
| 7 | 0.1282 | 41.693 | 33.464 | 34.075 | 16.424 | 12.102 |
| 7 | 0.1292 | 38.051 | 33.402 | 34.276 | 20.832 | 12.986 |
| 7 | 0.1302 | 34.575 | 35.226 | 33.500 | 24.771 | 17.009 |
| 7 | 0.1312 | 9.134  | 10.925 | 10.740 | 12.718 | 12.135 |
| 7 | 0.1322 | 20.192 | 19.482 | 28.026 | 11.810 | 19.515 |
| 7 | 0.1332 | 30.312 | 24.184 | 35.935 | 14.642 | 15.089 |
| 7 | 0.1342 | 25.869 | 20.573 | 17.808 | 15.530 | 11.151 |
| 7 | 0.1352 | 13.000 | 16.319 | 10.909 | 9.251  | 17.592 |
| 7 | 0.1362 | 22.786 | 16.687 | 15.785 | 14.584 | 28.095 |
| 7 | 0.1372 | 23.037 | 17.226 | 16.854 | 11.430 | 21.593 |
| 7 | 0.1382 | 28.462 | 22.706 | 23.382 | 23.013 | 26.402 |
| 7 | 0.1392 | 27.558 | 19.800 | 24.471 | 15.624 | 15.367 |
| 7 | 0.1402 | 28.260 | 20.776 | 20.797 | 13.068 | 27.862 |
| 7 | 0.1412 | 23.395 | 21.783 | 19.730 | 9.633  | 18.836 |
| 7 | 0.1422 | 19.576 | 26.766 | 23.691 | 10.408 | 8.340  |
| 7 | 0.1432 | 19.596 | 26.840 | 23.750 | 10.436 | 8.157  |
| 7 | 0.1442 | 20.576 | 19.508 | 14.746 | 9.614  | 12.562 |
| 7 | 0.1452 | 12.912 | 20.939 | 15.834 | 11.813 | 13.796 |
| 7 | 0.1462 | 23.577 | 26.747 | 22.245 | 12.172 | 8.036  |
| 7 | 0.1472 | 16.988 | 9.737  | 9.874  | 4.649  | 10.989 |
| 7 | 0.1482 | 20.680 | 16.716 | 13.607 | 11.270 | 19.896 |
| 7 | 0.1492 | 23.135 | 22.867 | 22.955 | 10.935 | 19.631 |
| 7 | 0.1502 | 20.793 | 22.673 | 18.365 | 5.413  | 12.294 |
| 7 | 0.1512 | 15.050 | 18.503 | 16.586 | 3.946  | 9.066  |
| 7 | 0.1522 | 28.729 | 30.692 | 26.646 | 10.458 | 26.307 |
| 7 | 0.1532 | 23.837 | 29.509 | 29.028 | 20.028 | 19.921 |
| 7 | 0.1542 | 13.413 | 18.535 | 17.619 | 23.657 | 20.962 |
| 7 | 0.1552 | 10.196 | 8.302  | 9.416  | 8.771  | 4.889  |
| 7 | 0.1562 | 9.452  | 11.090 | 8.952  | 7.077  | 13.902 |
| 7 | 0.1572 | 16.446 | 15.621 | 15.380 | 13.921 | 15.819 |
| 7 | 0.1582 | 11.936 | 13.886 | 16.055 | 11.161 | 18.554 |
| 7 | 0.1592 | 13.221 | 23.239 | 14.421 | 13.099 | 15.062 |
| 7 | 0.1602 | 11.600 | 15.968 | 13.363 | 8.918  | 12.239 |

|   |        |        |        |        |        |        |
|---|--------|--------|--------|--------|--------|--------|
| 7 | 0.1612 | 16.780 | 12.327 | 10.066 | 10.943 | 17.708 |
| 7 | 0.1622 | 28.202 | 22.351 | 17.541 | 15.618 | 16.086 |
| 7 | 0.1632 | 15.756 | 8.687  | 7.410  | 12.171 | 16.901 |
| 7 | 0.1642 | 15.724 | 8.676  | 7.436  | 12.179 | 16.903 |
| 7 | 0.1652 | 4.373  | 3.279  | 1.962  | 5.347  | 4.834  |
| 7 | 0.1662 | 10.433 | 10.594 | 7.927  | 8.067  | 20.492 |
| 7 | 0.1672 | 20.541 | 18.562 | 15.365 | 14.594 | 12.018 |
| 7 | 0.1682 | 21.814 | 14.215 | 18.038 | 15.125 | 20.963 |
| 7 | 0.1692 | 18.561 | 14.563 | 17.824 | 12.962 | 20.152 |
| 7 | 0.1702 | 39.250 | 30.361 | 29.836 | 9.851  | 9.972  |
| 7 | 0.1712 | 22.314 | 18.436 | 13.329 | 14.778 | 25.652 |
| 7 | 0.1722 | 15.502 | 19.065 | 13.866 | 12.451 | 19.111 |
| 7 | 0.1732 | 17.598 | 16.895 | 13.606 | 3.386  | 4.090  |
| 7 | 0.1742 | 23.885 | 20.468 | 16.647 | 6.027  | 6.599  |
| 7 | 0.1752 | 20.814 | 24.263 | 22.395 | 8.952  | 6.820  |
| 7 | 0.1762 | 20.826 | 24.254 | 22.391 | 8.928  | 6.816  |
| 7 | 0.1772 | 12.843 | 10.854 | 11.816 | 9.186  | 10.749 |
| 7 | 0.1782 | 13.498 | 5.887  | 10.518 | 5.015  | 6.421  |
| 7 | 0.1792 | 13.463 | 5.879  | 10.491 | 5.004  | 6.439  |
| 7 | 0.1802 | 7.573  | 8.072  | 9.763  | 2.110  | 2.834  |
| 7 | 0.1812 | 10.141 | 10.191 | 11.268 | 9.444  | 10.158 |
| 7 | 0.1822 | 10.975 | 10.010 | 10.544 | 6.940  | 5.744  |
| 7 | 0.1832 | 28.606 | 28.068 | 21.472 | 7.572  | 12.887 |
| 7 | 0.1842 | 21.665 | 27.066 | 18.684 | 11.754 | 12.455 |
| 7 | 0.1852 | 31.647 | 28.927 | 27.630 | 16.343 | 8.142  |
| 7 | 0.1862 | 37.006 | 22.398 | 24.141 | 21.488 | 16.153 |
| 7 | 0.1872 | 12.227 | 9.128  | 8.599  | 10.700 | 13.928 |
| 7 | 0.1882 | 29.194 | 36.254 | 32.181 | 11.342 | 5.572  |
| 7 | 0.1892 | 32.589 | 38.280 | 33.942 | 12.364 | 8.646  |
| 7 | 0.1902 | 17.313 | 15.496 | 14.250 | 1.951  | 7.299  |
| 7 | 0.1912 | 2.008  | 2.446  | 2.536  | 3.107  | 11.683 |
| 7 | 0.1922 | 4.078  | 3.525  | 2.640  | 6.026  | 17.253 |
| 7 | 0.1932 | 10.089 | 7.072  | 9.912  | 6.438  | 19.071 |
| 7 | 0.1942 | 10.308 | 9.683  | 10.985 | 5.718  | 10.573 |
| 7 | 0.1952 | 33.003 | 33.976 | 31.056 | 14.720 | 10.373 |
| 7 | 0.1962 | 16.610 | 18.902 | 17.398 | 12.679 | 11.870 |
| 7 | 0.1972 | 21.137 | 19.527 | 17.376 | 11.074 | 17.535 |
| 7 | 0.1982 | 13.461 | 9.523  | 10.957 | 9.892  | 18.398 |
| 7 | 0.1992 | 17.819 | 13.320 | 17.510 | 7.236  | 9.968  |
| 7 | 0.2002 | 24.985 | 18.831 | 27.326 | 11.979 | 5.413  |
| 7 | 0.2012 | 20.565 | 14.668 | 22.424 | 5.511  | 7.256  |
| 7 | 0.2022 | 17.229 | 15.864 | 19.566 | 7.793  | 9.999  |
| 7 | 0.2032 | 21.353 | 16.506 | 23.826 | 9.456  | 4.501  |
| 7 | 0.2042 | 12.427 | 14.329 | 14.640 | 8.170  | 8.635  |
| 7 | 0.2052 | 5.497  | 12.426 | 9.392  | 11.305 | 8.846  |
| 7 | 0.2062 | 16.058 | 12.507 | 26.813 | 6.872  | 19.475 |
| 7 | 0.2072 | 24.049 | 21.722 | 22.590 | 12.419 | 16.653 |
| 7 | 0.2082 | 38.602 | 22.081 | 34.387 | 15.439 | 7.680  |
| 7 | 0.2092 | 25.816 | 26.173 | 28.328 | 14.067 | 10.106 |
| 7 | 0.2102 | 23.304 | 15.846 | 19.205 | 13.428 | 12.044 |



|   |        |        |        |        |        |        |
|---|--------|--------|--------|--------|--------|--------|
| 7 | 0.2112 | 12.834 | 10.716 | 12.160 | 15.785 | 15.118 |
| 7 | 0.2122 | 18.963 | 21.227 | 19.327 | 10.919 | 16.893 |
| 7 | 0.2132 | 20.541 | 19.483 | 18.495 | 5.403  | 9.716  |
| 7 | 0.2142 | 14.007 | 7.774  | 14.254 | 12.893 | 12.410 |
| 7 | 0.2152 | 11.784 | 9.664  | 14.321 | 6.932  | 18.719 |
| 7 | 0.2162 | 25.388 | 16.287 | 26.165 | 17.451 | 8.433  |
| 7 | 0.2172 | 32.888 | 32.043 | 32.987 | 10.972 | 12.983 |
| 7 | 0.2182 | 22.511 | 9.894  | 15.334 | 11.403 | 11.001 |
| 7 | 0.2192 | 20.303 | 13.266 | 20.188 | 11.525 | 7.208  |
| 7 | 0.2202 | 19.940 | 19.193 | 20.504 | 7.386  | 26.507 |
| 7 | 0.2212 | 18.660 | 17.068 | 21.422 | 12.096 | 11.387 |
| 7 | 0.2222 | 8.797  | 12.194 | 13.491 | 13.792 | 10.824 |
| 7 | 0.2232 | 26.221 | 13.727 | 16.925 | 15.381 | 12.440 |
| 7 | 0.2242 | 21.212 | 16.176 | 15.689 | 10.558 | 12.062 |
| 7 | 0.2252 | 29.482 | 27.840 | 37.667 | 24.973 | 11.764 |
| 7 | 0.2262 | 30.686 | 24.316 | 34.535 | 12.511 | 9.277  |
| 7 | 0.2272 | 25.648 | 25.792 | 27.399 | 8.450  | 13.275 |
| 7 | 0.2282 | 23.979 | 20.911 | 18.733 | 9.859  | 13.373 |
| 7 | 0.2292 | 30.172 | 27.794 | 27.615 | 15.142 | 8.995  |
| 7 | 0.2302 | 23.616 | 29.180 | 20.617 | 17.686 | 7.768  |
| 7 | 0.2312 | 36.298 | 40.088 | 36.101 | 12.574 | 9.381  |
| 7 | 0.2322 | 26.852 | 29.642 | 31.205 | 12.509 | 13.501 |
| 7 | 0.2332 | 22.991 | 36.308 | 26.690 | 14.125 | 18.447 |
| 7 | 0.2342 | 11.198 | 16.506 | 12.296 | 8.338  | 16.520 |
| 7 | 0.2352 | 9.648  | 8.705  | 12.465 | 12.040 | 16.076 |
| 7 | 0.2362 | 25.506 | 20.913 | 24.422 | 6.044  | 11.722 |
| 7 | 0.2372 | 13.809 | 11.960 | 8.866  | 7.016  | 26.727 |
| 7 | 0.2382 | 14.892 | 6.404  | 9.575  | 9.009  | 16.746 |
| 7 | 0.2392 | 21.788 | 11.480 | 13.644 | 9.663  | 18.256 |
| 7 | 0.2402 | 12.295 | 12.613 | 12.502 | 6.899  | 3.814  |
| 7 | 0.2412 | 9.767  | 14.321 | 13.817 | 8.789  | 10.721 |
| 7 | 0.2422 | 6.393  | 4.770  | 4.456  | 11.898 | 16.644 |
| 7 | 0.2432 | 7.687  | 8.584  | 8.546  | 22.108 | 23.692 |
| 7 | 0.2442 | 7.168  | 9.502  | 5.620  | 13.912 | 26.238 |
| 7 | 0.2452 | 14.944 | 10.542 | 8.193  | 17.743 | 22.701 |
| 7 | 0.2462 | 12.508 | 7.260  | 10.822 | 12.702 | 12.870 |
| 7 | 0.2472 | 26.433 | 30.161 | 18.626 | 9.792  | 15.205 |
| 7 | 0.2482 | 16.612 | 29.041 | 14.162 | 10.174 | 16.048 |
| 7 | 0.2492 | 17.967 | 26.152 | 18.173 | 8.556  | 13.213 |
| 7 | 0.2502 | 27.421 | 27.963 | 22.257 | 6.621  | 31.598 |
| 7 | 0.2512 | 15.140 | 13.206 | 13.468 | 13.303 | 13.805 |
| 7 | 0.2522 | 23.437 | 20.581 | 21.498 | 19.463 | 21.152 |
| 7 | 0.2532 | 13.704 | 18.828 | 12.711 | 26.325 | 18.005 |
| 7 | 0.2542 | 9.054  | 12.456 | 7.836  | 19.043 | 18.077 |
| 7 | 0.2552 | 24.359 | 37.381 | 26.151 | 27.776 | 23.291 |
| 7 | 0.2562 | 14.317 | 14.976 | 13.918 | 18.665 | 10.179 |
| 7 | 0.2572 | 21.802 | 19.611 | 25.899 | 21.047 | 6.893  |
| 7 | 0.2582 | 23.721 | 30.568 | 28.289 | 21.804 | 21.671 |
| 7 | 0.2592 | 10.238 | 7.998  | 7.303  | 17.237 | 9.972  |
| 7 | 0.2602 | 25.194 | 19.609 | 17.062 | 16.511 | 20.473 |

|   |        |        |        |        |        |        |
|---|--------|--------|--------|--------|--------|--------|
| 7 | 0.2612 | 18.451 | 15.174 | 12.204 | 15.511 | 9.196  |
| 7 | 0.2622 | 30.299 | 36.225 | 30.802 | 23.154 | 9.260  |
| 7 | 0.2632 | 30.946 | 31.574 | 25.470 | 17.761 | 10.036 |
| 7 | 0.2642 | 25.697 | 15.378 | 18.266 | 14.992 | 16.118 |
| 7 | 0.2652 | 25.734 | 15.411 | 18.312 | 14.895 | 16.085 |
| 7 | 0.2662 | 15.939 | 12.889 | 11.693 | 18.963 | 16.791 |
| 7 | 0.2672 | 22.105 | 14.857 | 16.179 | 14.768 | 23.942 |
| 7 | 0.2682 | 23.843 | 15.536 | 15.003 | 20.171 | 22.228 |
| 7 | 0.2692 | 29.571 | 26.605 | 24.402 | 13.928 | 23.657 |
| 7 | 0.2702 | 25.874 | 20.097 | 23.501 | 9.237  | 14.723 |
| 7 | 0.2712 | 25.679 | 16.396 | 19.419 | 13.263 | 12.020 |
| 7 | 0.2722 | 16.481 | 17.480 | 17.672 | 21.260 | 10.382 |
| 7 | 0.2732 | 26.841 | 29.069 | 29.026 | 14.038 | 10.059 |
| 7 | 0.2742 | 24.194 | 28.520 | 32.699 | 13.497 | 10.763 |
| 7 | 0.2752 | 14.536 | 14.133 | 17.671 | 16.165 | 10.633 |
| 7 | 0.2762 | 22.756 | 14.129 | 20.499 | 13.517 | 9.351  |
| 7 | 0.2772 | 19.503 | 13.058 | 16.722 | 12.036 | 9.539  |
| 7 | 0.2782 | 16.744 | 10.124 | 7.703  | 10.723 | 13.337 |
| 7 | 0.2792 | 16.752 | 10.155 | 7.839  | 10.767 | 13.286 |
| 7 | 0.2802 | 19.933 | 19.228 | 10.736 | 13.780 | 9.039  |
| 7 | 0.2812 | 10.154 | 15.132 | 10.209 | 18.831 | 10.901 |
| 7 | 0.2822 | 19.280 | 24.732 | 17.656 | 24.580 | 8.708  |
| 7 | 0.2832 | 23.585 | 21.396 | 24.563 | 18.124 | 13.048 |
| 7 | 0.2842 | 44.297 | 33.372 | 38.967 | 11.918 | 12.097 |
| 7 | 0.2852 | 29.641 | 34.548 | 29.498 | 14.677 | 7.831  |
| 7 | 0.2862 | 30.294 | 38.653 | 33.649 | 17.321 | 6.907  |
| 7 | 0.2872 | 17.021 | 17.547 | 17.738 | 19.040 | 8.360  |
| 7 | 0.2882 | 22.353 | 17.416 | 19.362 | 12.019 | 5.762  |
| 7 | 0.2892 | 22.039 | 27.656 | 20.934 | 16.177 | 5.311  |
| 7 | 0.2902 | 17.067 | 15.603 | 13.551 | 15.680 | 13.787 |
| 7 | 0.2912 | 12.857 | 15.708 | 16.488 | 19.255 | 12.302 |
| 7 | 0.2922 | 9.915  | 15.458 | 12.180 | 19.021 | 5.682  |
| 7 | 0.2932 | 27.924 | 16.934 | 26.438 | 20.668 | 7.881  |
| 7 | 0.2942 | 20.939 | 15.575 | 19.608 | 26.199 | 8.399  |
| 7 | 0.2952 | 6.201  | 5.309  | 6.705  | 13.181 | 5.421  |
| 7 | 0.2962 | 18.452 | 12.462 | 17.563 | 15.793 | 15.346 |
| 7 | 0.2972 | 26.573 | 26.797 | 32.097 | 13.009 | 16.945 |
| 7 | 0.2982 | 29.014 | 30.094 | 37.581 | 13.936 | 10.370 |
| 7 | 0.2992 | 30.611 | 21.936 | 30.342 | 17.968 | 16.228 |
| 7 | 0.3002 | 32.403 | 22.147 | 30.942 | 17.976 | 11.771 |
| 7 | 0.3012 | 29.728 | 19.046 | 29.683 | 19.569 | 10.869 |
| 7 | 0.3022 | 22.589 | 15.885 | 22.569 | 20.154 | 15.087 |
| 7 | 0.3032 | 30.150 | 16.096 | 25.792 | 9.648  | 4.906  |
| 7 | 0.3042 | 25.306 | 25.272 | 31.575 | 12.757 | 6.430  |
| 7 | 0.3052 | 25.303 | 25.265 | 31.558 | 12.756 | 6.427  |
| 7 | 0.3062 | 21.718 | 14.813 | 23.283 | 12.711 | 4.449  |
| 7 | 0.3072 | 14.220 | 9.414  | 13.881 | 8.936  | 4.538  |
| 7 | 0.3082 | 20.996 | 13.414 | 14.797 | 8.954  | 7.925  |
| 7 | 0.3092 | 20.017 | 17.423 | 20.032 | 8.473  | 9.682  |
| 7 | 0.3102 | 15.560 | 13.166 | 14.957 | 12.999 | 8.430  |

|   |        |        |        |        |        |        |
|---|--------|--------|--------|--------|--------|--------|
| 7 | 0.3112 | 14.727 | 15.814 | 15.200 | 13.091 | 9.734  |
| 7 | 0.3122 | 28.421 | 28.886 | 31.964 | 10.888 | 9.861  |
| 7 | 0.3132 | 29.601 | 31.440 | 28.600 | 16.749 | 13.229 |
| 7 | 0.3142 | 21.728 | 25.354 | 30.345 | 16.005 | 10.320 |
| 7 | 0.3152 | 22.494 | 29.810 | 27.664 | 15.141 | 2.145  |
| 7 | 0.3162 | 24.866 | 20.746 | 28.351 | 9.696  | 3.839  |
| 7 | 0.3172 | 20.464 | 22.174 | 19.816 | 11.029 | 9.669  |
| 7 | 0.3182 | 24.477 | 24.967 | 33.196 | 12.896 | 10.099 |
| 7 | 0.3192 | 22.721 | 22.491 | 20.652 | 18.908 | 13.423 |
| 7 | 0.3202 | 22.514 | 22.654 | 24.641 | 13.713 | 7.199  |
| 7 | 0.3212 | 23.437 | 16.905 | 20.291 | 19.242 | 8.324  |
| 7 | 0.3222 | 25.099 | 13.006 | 19.846 | 14.506 | 7.579  |
| 7 | 0.3232 | 31.800 | 15.912 | 24.026 | 11.959 | 7.248  |
| 7 | 0.3242 | 14.739 | 11.843 | 16.843 | 9.919  | 14.503 |
| 7 | 0.3252 | 15.418 | 18.162 | 22.587 | 13.125 | 8.200  |
| 7 | 0.3262 | 10.864 | 6.089  | 13.212 | 16.380 | 18.191 |
| 7 | 0.3272 | 14.604 | 7.940  | 14.315 | 19.585 | 26.948 |
| 7 | 0.3282 | 14.946 | 12.946 | 14.399 | 17.793 | 8.193  |
| 7 | 0.3292 | 11.342 | 5.999  | 11.427 | 11.259 | 10.503 |
| 7 | 0.3302 | 6.776  | 5.951  | 10.987 | 3.212  | 9.507  |
| 7 | 0.3312 | 27.945 | 32.874 | 31.230 | 29.070 | 16.252 |
| 7 | 0.3322 | 21.477 | 19.576 | 19.184 | 8.675  | 8.596  |
| 7 | 0.3332 | 17.581 | 13.807 | 13.196 | 11.204 | 17.999 |
| 7 | 0.3342 | 16.049 | 15.606 | 18.742 | 10.172 | 9.548  |
| 7 | 0.3352 | 19.938 | 17.542 | 19.475 | 18.639 | 10.725 |
| 7 | 0.3362 | 18.696 | 15.379 | 19.315 | 21.093 | 12.868 |
| 7 | 0.3372 | 11.820 | 15.791 | 13.740 | 29.940 | 14.094 |
| 7 | 0.3382 | 18.549 | 23.450 | 25.642 | 13.662 | 24.244 |
| 7 | 0.3392 | 18.326 | 15.912 | 20.291 | 11.259 | 12.622 |
| 7 | 0.3402 | 20.019 | 23.977 | 20.299 | 24.577 | 21.359 |
| 7 | 0.3412 | 23.244 | 19.812 | 22.341 | 25.575 | 16.247 |
| 7 | 0.3422 | 19.926 | 14.652 | 23.066 | 21.813 | 14.654 |
| 7 | 0.3432 | 14.632 | 16.896 | 20.085 | 17.675 | 8.660  |
| 7 | 0.3442 | 20.337 | 16.085 | 26.886 | 27.434 | 22.437 |
| 7 | 0.3452 | 29.059 | 17.166 | 32.123 | 25.150 | 25.281 |
| 7 | 0.3462 | 16.265 | 11.699 | 18.740 | 14.642 | 19.303 |
| 7 | 0.3472 | 7.185  | 10.584 | 11.894 | 3.230  | 12.287 |
| 7 | 0.3482 | 22.158 | 16.628 | 12.746 | 7.941  | 9.169  |
| 7 | 0.3492 | 9.643  | 10.729 | 6.429  | 4.803  | 2.082  |
| 7 | 0.3502 | 16.451 | 30.349 | 20.345 | 7.642  | 8.819  |
| 7 | 0.3512 | 13.594 | 16.880 | 14.673 | 12.887 | 16.530 |
| 7 | 0.3522 | 14.618 | 21.575 | 16.381 | 12.210 | 10.997 |
| 7 | 0.3532 | 14.074 | 9.074  | 9.095  | 12.253 | 14.470 |
| 7 | 0.3542 | 11.724 | 8.241  | 11.129 | 14.229 | 12.065 |
| 7 | 0.3552 | 15.378 | 15.750 | 17.148 | 16.296 | 15.417 |
| 7 | 0.3562 | 27.833 | 21.178 | 26.315 | 18.316 | 9.728  |
| 7 | 0.3572 | 35.468 | 34.667 | 38.624 | 20.319 | 17.369 |
| 7 | 0.3582 | 29.258 | 19.545 | 30.313 | 12.956 | 14.291 |
| 7 | 0.3592 | 29.169 | 19.516 | 30.351 | 12.905 | 14.246 |
| 7 | 0.3602 | 13.549 | 20.911 | 19.677 | 16.263 | 11.103 |

|   |        |        |        |        |        |        |
|---|--------|--------|--------|--------|--------|--------|
| 7 | 0.3612 | 14.572 | 22.733 | 21.868 | 25.707 | 20.935 |
| 7 | 0.3622 | 16.184 | 15.997 | 16.953 | 9.589  | 12.351 |
| 7 | 0.3632 | 9.656  | 11.443 | 13.771 | 9.167  | 7.975  |
| 7 | 0.3642 | 16.604 | 11.770 | 17.037 | 7.995  | 15.454 |
| 7 | 0.3652 | 10.115 | 9.284  | 13.374 | 6.768  | 7.496  |
| 7 | 0.3662 | 13.602 | 21.420 | 21.866 | 10.417 | 11.612 |
| 7 | 0.3672 | 13.302 | 14.120 | 18.624 | 12.505 | 11.239 |
| 7 | 0.3682 | 16.145 | 8.920  | 13.179 | 10.908 | 10.272 |
| 7 | 0.3692 | 36.233 | 21.393 | 27.381 | 15.330 | 13.307 |
| 7 | 0.3702 | 17.622 | 11.911 | 15.189 | 14.480 | 19.800 |
| 7 | 0.3712 | 42.367 | 27.712 | 35.354 | 9.543  | 22.359 |
| 7 | 0.3722 | 25.171 | 25.145 | 23.880 | 10.115 | 8.719  |
| 7 | 0.3732 | 38.195 | 39.311 | 43.735 | 10.220 | 18.026 |
| 7 | 0.3742 | 19.179 | 17.267 | 18.516 | 17.191 | 12.646 |
| 7 | 0.3752 | 16.879 | 11.251 | 17.499 | 10.957 | 8.104  |
| 7 | 0.3762 | 27.706 | 32.764 | 33.982 | 18.002 | 5.519  |
| 7 | 0.3772 | 18.617 | 26.011 | 22.256 | 13.810 | 7.552  |
| 7 | 0.3782 | 14.361 | 10.085 | 15.501 | 7.612  | 12.575 |
| 7 | 0.3792 | 24.572 | 23.991 | 36.200 | 6.360  | 16.190 |
| 7 | 0.3802 | 24.614 | 24.012 | 36.257 | 6.360  | 16.209 |
| 7 | 0.3812 | 27.006 | 33.155 | 37.318 | 11.465 | 20.073 |
| 7 | 0.3822 | 26.992 | 33.102 | 37.303 | 11.445 | 20.075 |
| 7 | 0.3832 | 31.928 | 29.276 | 34.041 | 13.676 | 16.988 |
| 7 | 0.3842 | 34.585 | 39.925 | 41.618 | 16.762 | 12.968 |
| 7 | 0.3852 | 14.838 | 18.994 | 19.767 | 18.736 | 8.730  |
| 7 | 0.3862 | 11.264 | 15.635 | 9.138  | 20.829 | 14.684 |
| 7 | 0.3872 | 11.823 | 16.229 | 14.695 | 13.479 | 11.560 |
| 7 | 0.3882 | 26.244 | 34.241 | 30.952 | 32.919 | 15.410 |
| 7 | 0.3892 | 26.299 | 36.506 | 30.743 | 16.719 | 15.098 |
| 7 | 0.3902 | 29.595 | 32.621 | 28.190 | 12.208 | 16.191 |
| 7 | 0.3912 | 27.453 | 35.853 | 30.029 | 13.977 | 16.108 |
| 7 | 0.3922 | 29.332 | 33.030 | 33.955 | 14.480 | 16.980 |
| 7 | 0.3932 | 24.975 | 24.092 | 26.980 | 22.427 | 11.902 |
| 7 | 0.3942 | 24.999 | 24.032 | 26.937 | 22.373 | 11.900 |
| 7 | 0.3952 | 19.308 | 19.911 | 18.901 | 12.664 | 21.511 |
| 7 | 0.3962 | 13.519 | 16.248 | 11.415 | 9.725  | 14.360 |
| 7 | 0.3972 | 11.640 | 12.478 | 11.171 | 10.646 | 9.607  |
| 7 | 0.3982 | 16.072 | 11.636 | 12.455 | 9.530  | 8.533  |
| 7 | 0.3992 | 16.171 | 11.662 | 12.537 | 9.577  | 8.563  |
| 7 | 0.4002 | 12.611 | 11.130 | 10.656 | 4.152  | 3.747  |
| 7 | 0.4012 | 7.873  | 11.276 | 16.787 | 10.210 | 16.728 |
| 7 | 0.4022 | 9.526  | 13.203 | 16.446 | 12.159 | 8.189  |
| 7 | 0.4032 | 22.336 | 7.739  | 18.307 | 17.786 | 6.297  |
| 7 | 0.4042 | 21.066 | 14.012 | 20.863 | 11.523 | 14.949 |
| 7 | 0.4052 | 19.387 | 26.716 | 24.468 | 15.489 | 13.329 |
| 7 | 0.4062 | 15.955 | 20.505 | 19.499 | 10.439 | 11.859 |
| 7 | 0.4072 | 25.425 | 25.097 | 29.454 | 6.044  | 12.672 |
| 7 | 0.4082 | 19.117 | 25.699 | 26.184 | 12.809 | 18.175 |
| 7 | 0.4092 | 7.811  | 13.413 | 9.808  | 11.044 | 13.632 |
| 7 | 0.4102 | 5.953  | 12.616 | 6.201  | 10.331 | 19.263 |

|   |        |        |        |        |        |        |
|---|--------|--------|--------|--------|--------|--------|
| 7 | 0.4112 | 22.808 | 20.473 | 25.784 | 4.848  | 20.310 |
| 7 | 0.4122 | 26.099 | 17.785 | 26.924 | 11.438 | 16.688 |
| 7 | 0.4132 | 9.454  | 23.514 | 17.575 | 13.412 | 19.965 |
| 7 | 0.4142 | 22.245 | 25.273 | 28.573 | 17.698 | 32.568 |
| 7 | 0.4152 | 29.421 | 35.392 | 34.415 | 16.968 | 19.871 |
| 7 | 0.4162 | 31.256 | 25.021 | 33.115 | 10.218 | 19.363 |
| 7 | 0.4172 | 35.900 | 34.160 | 37.839 | 21.377 | 20.163 |
| 7 | 0.4182 | 27.481 | 28.675 | 34.267 | 16.119 | 22.091 |
| 7 | 0.4192 | 28.848 | 25.682 | 32.658 | 12.850 | 15.684 |
| 7 | 0.4202 | 20.171 | 20.443 | 26.540 | 8.009  | 3.955  |
| 7 | 0.4212 | 20.916 | 24.229 | 28.652 | 8.802  | 1.626  |
| 7 | 0.4222 | 27.212 | 29.570 | 31.904 | 13.198 | 14.561 |
| 7 | 0.4232 | 12.018 | 8.761  | 14.133 | 11.952 | 18.469 |
| 7 | 0.4242 | 6.803  | 12.573 | 10.597 | 8.274  | 6.684  |
| 7 | 0.4252 | 13.236 | 15.835 | 18.426 | 11.983 | 15.898 |
| 7 | 0.4262 | 11.314 | 15.433 | 16.868 | 8.627  | 11.329 |
| 7 | 0.4272 | 28.702 | 32.067 | 31.320 | 15.292 | 12.327 |
| 7 | 0.4282 | 19.405 | 22.816 | 20.079 | 12.507 | 13.638 |
| 7 | 0.4292 | 10.685 | 10.949 | 15.384 | 10.749 | 16.797 |
| 7 | 0.4302 | 16.342 | 8.825  | 13.505 | 8.866  | 4.910  |
| 7 | 0.4312 | 19.253 | 11.557 | 15.520 | 10.023 | 9.919  |
| 7 | 0.4322 | 11.118 | 5.434  | 8.800  | 9.526  | 3.910  |
| 7 | 0.4332 | 15.354 | 12.295 | 15.232 | 16.685 | 10.979 |
| 7 | 0.4342 | 18.682 | 23.808 | 22.171 | 7.526  | 5.133  |
| 7 | 0.4352 | 25.954 | 25.641 | 28.975 | 17.242 | 10.448 |
| 7 | 0.4362 | 28.374 | 25.084 | 31.775 | 12.426 | 8.880  |
| 7 | 0.4372 | 15.920 | 14.167 | 19.183 | 9.332  | 5.816  |
| 7 | 0.4382 | 9.782  | 10.167 | 8.966  | 7.003  | 6.526  |
| 7 | 0.4392 | 14.939 | 9.207  | 15.079 | 17.802 | 7.996  |
| 7 | 0.4402 | 14.342 | 12.349 | 15.836 | 7.997  | 15.280 |
| 7 | 0.4412 | 13.454 | 9.523  | 10.700 | 13.882 | 14.132 |
| 7 | 0.4422 | 15.770 | 11.678 | 15.150 | 18.092 | 12.290 |
| 7 | 0.4432 | 19.016 | 16.610 | 20.214 | 12.646 | 15.178 |
| 7 | 0.4442 | 12.348 | 13.949 | 20.265 | 11.690 | 16.480 |
| 7 | 0.4452 | 18.597 | 16.299 | 26.458 | 21.359 | 25.539 |
| 7 | 0.4462 | 16.366 | 15.769 | 18.530 | 15.108 | 18.827 |
| 7 | 0.4472 | 21.174 | 24.027 | 25.933 | 14.320 | 14.219 |
| 7 | 0.4482 | 12.921 | 10.739 | 16.319 | 11.196 | 7.492  |
| 7 | 0.4492 | 17.487 | 14.659 | 23.489 | 6.438  | 10.806 |
| 7 | 0.4502 | 14.985 | 18.949 | 22.329 | 24.087 | 19.636 |
| 7 | 0.4512 | 15.146 | 10.602 | 14.823 | 16.529 | 12.737 |
| 7 | 0.4522 | 15.717 | 17.570 | 20.419 | 10.597 | 14.820 |
| 7 | 0.4532 | 16.509 | 14.501 | 20.435 | 6.883  | 19.423 |
| 7 | 0.4542 | 9.206  | 5.654  | 6.505  | 9.282  | 12.912 |
| 7 | 0.4552 | 8.668  | 4.462  | 7.846  | 8.295  | 7.331  |
| 7 | 0.4562 | 2.668  | 0.910  | 1.379  | 3.880  | 4.132  |
| 7 | 0.4572 | 8.096  | 3.268  | 10.757 | 7.437  | 13.138 |
| 7 | 0.4582 | 4.072  | 2.109  | 9.184  | 4.988  | 7.806  |
| 7 | 0.4592 | 1.228  | 2.006  | 5.201  | 1.015  | 8.200  |
| 7 | 0.4602 | 8.351  | 1.715  | 8.681  | 3.030  | 5.331  |

|   |        |        |        |        |        |        |
|---|--------|--------|--------|--------|--------|--------|
| 7 | 0.4612 | 7.882  | 1.443  | 7.712  | 3.001  | 5.365  |
| 7 | 0.4622 | 9.104  | 9.954  | 9.860  | 8.354  | 3.878  |
| 7 | 0.4632 | 13.093 | 12.232 | 9.822  | 5.878  | 2.797  |
| 7 | 0.4642 | 8.481  | 4.663  | 10.800 | 2.424  | 3.821  |
| 7 | 0.4652 | 6.700  | 3.614  | 8.789  | 2.606  | 1.965  |
| 7 | 0.4662 | 2.004  | 1.923  | 0.603  | 1.963  | 1.476  |
| 7 | 0.4672 | 12.540 | 9.753  | 17.359 | 4.245  | 4.063  |
| 7 | 0.4682 | 10.594 | 7.961  | 13.746 | 5.214  | 1.111  |
| 7 | 0.4692 | 5.008  | 5.097  | 6.302  | 1.682  | 0.619  |
| 7 | 0.4702 | 7.787  | 6.649  | 13.064 | 4.441  | 1.816  |
| 7 | 0.4712 | 13.651 | 9.252  | 18.425 | 8.145  | 9.449  |
| 7 | 0.4722 | 24.040 | 21.040 | 25.946 | 12.019 | 11.410 |
| 7 | 0.4732 | 21.869 | 19.041 | 23.955 | 11.900 | 8.242  |
| 7 | 0.4742 | 20.594 | 22.748 | 26.600 | 21.586 | 4.964  |
| 7 | 0.4752 | 23.073 | 25.143 | 24.429 | 14.602 | 8.245  |
| 7 | 0.4762 | 1.867  | 5.039  | 4.402  | 3.493  | 4.804  |
| 7 | 0.4772 | 9.837  | 6.571  | 13.201 | 5.036  | 5.491  |
| 7 | 0.4782 | 11.921 | 5.143  | 9.859  | 8.033  | 7.656  |
| 7 | 0.4792 | 11.273 | 3.273  | 9.117  | 6.950  | 8.786  |
| 7 | 0.4802 | 7.020  | 1.619  | 6.278  | 6.665  | 8.249  |
| 7 | 0.4812 | 4.230  | 1.531  | 9.583  | 6.838  | 5.602  |
| 7 | 0.4822 | 13.685 | 13.361 | 13.422 | 2.239  | 9.512  |
| 7 | 0.4832 | 12.948 | 15.576 | 11.294 | 7.483  | 6.326  |
| 7 | 0.4842 | 12.338 | 8.004  | 6.023  | 1.140  | 11.973 |
| 7 | 0.4852 | 13.239 | 9.786  | 7.198  | 10.144 | 19.018 |
| 7 | 0.4862 | 7.478  | 4.124  | 4.010  | 7.491  | 14.731 |
| 7 | 0.4872 | 7.479  | 4.120  | 4.007  | 7.499  | 14.725 |
| 7 | 0.4882 | 9.814  | 6.284  | 4.869  | 7.408  | 24.780 |
| 7 | 0.4892 | 16.283 | 8.972  | 18.769 | 6.614  | 11.121 |
| 7 | 0.4902 | 16.864 | 23.930 | 22.371 | 19.377 | 8.601  |
| 7 | 0.4912 | 4.542  | 6.358  | 7.379  | 6.893  | 8.279  |
| 7 | 0.4922 | 5.992  | 3.005  | 6.032  | 7.984  | 7.335  |
| 7 | 0.4932 | 6.413  | 3.278  | 7.732  | 3.763  | 4.826  |
| 7 | 0.4942 | 12.459 | 3.642  | 11.606 | 10.083 | 6.882  |
| 7 | 0.4952 | 17.043 | 5.634  | 15.118 | 10.561 | 7.079  |
| 7 | 0.4962 | 29.259 | 30.147 | 32.650 | 17.044 | 11.369 |
| 7 | 0.4972 | 21.503 | 15.562 | 20.254 | 9.104  | 11.992 |
| 7 | 0.4982 | 11.006 | 15.673 | 15.671 | 7.930  | 8.876  |
| 7 | 0.4992 | 20.670 | 22.889 | 21.476 | 14.891 | 9.494  |
| 7 | 0.5002 | 20.775 | 22.975 | 21.520 | 14.843 | 9.575  |
| 7 | 0.5012 | 19.119 | 21.619 | 28.074 | 16.826 | 8.327  |
| 7 | 0.5022 | 2.806  | 3.700  | 4.026  | 7.443  | 7.648  |
| 7 | 0.5032 | 12.063 | 14.674 | 16.639 | 4.506  | 7.549  |
| 7 | 0.5042 | 24.504 | 17.432 | 22.744 | 23.453 | 13.183 |
| 7 | 0.5052 | 12.166 | 6.502  | 10.875 | 8.437  | 17.102 |
| 7 | 0.5062 | 13.986 | 4.067  | 13.841 | 20.552 | 10.651 |
| 7 | 0.5072 | 8.782  | 8.779  | 9.366  | 16.447 | 7.810  |
| 7 | 0.5082 | 13.722 | 10.938 | 13.356 | 15.684 | 11.893 |
| 7 | 0.5092 | 26.876 | 33.191 | 25.748 | 14.656 | 20.684 |
| 7 | 0.5102 | 22.418 | 19.989 | 24.046 | 8.176  | 19.837 |

|   |        |        |        |        |        |        |
|---|--------|--------|--------|--------|--------|--------|
| 7 | 0.5112 | 20.905 | 14.236 | 20.774 | 10.690 | 21.310 |
| 7 | 0.5122 | 13.910 | 12.341 | 13.049 | 11.760 | 14.849 |
| 7 | 0.5132 | 19.863 | 15.152 | 20.058 | 9.065  | 16.633 |
| 7 | 0.5142 | 29.020 | 31.713 | 27.489 | 17.483 | 14.241 |
| 7 | 0.5152 | 15.386 | 13.681 | 16.499 | 12.014 | 18.439 |
| 7 | 0.5162 | 17.272 | 17.280 | 16.493 | 13.221 | 11.827 |
| 7 | 0.5172 | 9.418  | 8.323  | 12.983 | 7.788  | 12.409 |
| 7 | 0.5182 | 14.320 | 10.331 | 17.961 | 13.120 | 14.694 |
| 7 | 0.5192 | 13.922 | 7.591  | 16.253 | 13.006 | 24.531 |
| 7 | 0.5202 | 7.598  | 6.573  | 10.232 | 9.581  | 22.723 |
| 7 | 0.5212 | 11.249 | 6.272  | 14.344 | 12.901 | 15.588 |
| 7 | 0.5222 | 11.234 | 9.041  | 15.224 | 17.115 | 7.570  |
| 7 | 0.5232 | 17.915 | 20.465 | 9.852  | 17.195 | 17.165 |
| 7 | 0.5242 | 20.758 | 16.578 | 13.009 | 25.844 | 23.398 |
| 7 | 0.5252 | 12.825 | 12.942 | 9.837  | 9.722  | 12.002 |
| 7 | 0.5262 | 9.808  | 12.948 | 7.225  | 8.993  | 29.317 |
| 7 | 0.5272 | 17.556 | 20.880 | 12.430 | 23.835 | 13.516 |
| 7 | 0.5282 | 31.095 | 25.094 | 21.201 | 17.016 | 17.327 |
| 7 | 0.5292 | 31.106 | 25.104 | 21.218 | 17.069 | 17.350 |
| 7 | 0.5302 | 15.355 | 18.513 | 18.053 | 11.531 | 9.808  |
| 7 | 0.5312 | 15.084 | 13.507 | 17.727 | 17.862 | 16.970 |
| 7 | 0.5322 | 26.660 | 19.176 | 25.122 | 9.163  | 10.812 |
| 7 | 0.5332 | 17.987 | 16.385 | 18.565 | 17.289 | 17.622 |
| 7 | 0.5342 | 19.189 | 12.105 | 14.546 | 10.847 | 24.288 |
| 7 | 0.5352 | 23.833 | 17.958 | 18.562 | 16.445 | 17.313 |
| 7 | 0.5362 | 16.214 | 17.653 | 18.746 | 9.866  | 7.706  |
| 7 | 0.5372 | 11.168 | 12.591 | 15.050 | 15.919 | 34.486 |
| 7 | 0.5382 | 10.916 | 14.169 | 13.615 | 12.257 | 12.982 |
| 7 | 0.5392 | 23.213 | 22.213 | 24.172 | 13.891 | 9.293  |
| 7 | 0.5402 | 13.497 | 17.803 | 13.962 | 24.894 | 13.560 |
| 7 | 0.5412 | 8.780  | 9.497  | 13.478 | 28.728 | 24.330 |
| 7 | 0.5422 | 11.405 | 12.762 | 14.399 | 15.382 | 19.529 |
| 7 | 0.5432 | 13.343 | 12.723 | 11.027 | 13.432 | 19.345 |
| 7 | 0.5442 | 8.540  | 12.284 | 11.650 | 14.432 | 10.236 |
| 7 | 0.5452 | 24.896 | 21.734 | 19.014 | 14.131 | 8.137  |
| 7 | 0.5462 | 32.058 | 26.699 | 22.668 | 8.320  | 17.869 |
| 7 | 0.5472 | 7.051  | 6.927  | 6.024  | 17.405 | 10.631 |
| 7 | 0.5482 | 17.190 | 7.926  | 7.156  | 19.031 | 16.178 |
| 7 | 0.5492 | 16.029 | 8.215  | 13.618 | 12.532 | 20.601 |
| 7 | 0.5502 | 20.955 | 18.761 | 13.092 | 11.470 | 7.142  |
| 7 | 0.5512 | 18.964 | 13.996 | 18.919 | 11.848 | 16.258 |
| 7 | 0.5522 | 20.099 | 13.761 | 11.419 | 9.087  | 11.418 |
| 7 | 0.5532 | 16.002 | 7.516  | 8.964  | 7.695  | 25.026 |
| 7 | 0.5542 | 54.015 | 45.602 | 40.294 | 12.728 | 21.619 |
| 7 | 0.5552 | 14.575 | 13.736 | 9.073  | 11.941 | 11.627 |
| 7 | 0.5562 | 9.709  | 12.083 | 10.815 | 10.195 | 13.829 |
| 7 | 0.5572 | 23.862 | 25.556 | 22.629 | 9.415  | 10.546 |
| 7 | 0.5582 | 24.762 | 16.438 | 20.245 | 19.435 | 13.663 |
| 7 | 0.5592 | 17.668 | 9.097  | 16.659 | 18.942 | 21.287 |
| 7 | 0.5602 | 9.482  | 6.751  | 10.181 | 12.035 | 13.423 |

|   |        |        |        |        |        |        |
|---|--------|--------|--------|--------|--------|--------|
| 7 | 0.5612 | 6.334  | 5.702  | 7.120  | 15.443 | 5.745  |
| 7 | 0.5622 | 17.388 | 11.409 | 14.854 | 15.775 | 12.126 |
| 7 | 0.5632 | 17.018 | 11.266 | 14.045 | 11.434 | 11.347 |
| 7 | 0.5642 | 16.165 | 16.955 | 12.727 | 10.812 | 9.772  |
| 7 | 0.5652 | 21.370 | 23.432 | 14.847 | 17.121 | 7.113  |
| 7 | 0.5662 | 7.228  | 8.161  | 3.226  | 13.074 | 14.213 |
| 7 | 0.5672 | 13.550 | 9.671  | 12.892 | 12.758 | 11.910 |
| 7 | 0.5682 | 13.534 | 9.670  | 12.902 | 12.726 | 11.986 |
| 7 | 0.5692 | 12.423 | 11.495 | 12.044 | 5.859  | 12.661 |
| 7 | 0.5702 | 14.132 | 12.066 | 14.095 | 6.465  | 9.306  |
| 7 | 0.5712 | 8.538  | 3.727  | 6.259  | 9.910  | 11.547 |
| 7 | 0.5722 | 23.013 | 14.787 | 12.200 | 7.124  | 6.474  |
| 7 | 0.5732 | 13.071 | 7.811  | 10.838 | 16.424 | 10.205 |
| 7 | 0.5742 | 14.934 | 13.188 | 17.154 | 9.158  | 15.031 |
| 7 | 0.5752 | 10.640 | 8.697  | 12.964 | 2.666  | 5.312  |
| 7 | 0.5762 | 10.653 | 12.569 | 15.994 | 7.390  | 1.290  |
| 7 | 0.5772 | 15.126 | 12.837 | 11.419 | 12.699 | 8.586  |
| 7 | 0.5782 | 18.385 | 17.490 | 14.674 | 11.742 | 10.595 |
| 7 | 0.5792 | 23.276 | 18.571 | 20.268 | 18.518 | 22.454 |
| 7 | 0.5802 | 7.848  | 11.352 | 8.414  | 13.371 | 13.770 |
| 7 | 0.5812 | 24.556 | 14.597 | 20.180 | 8.544  | 12.120 |
| 7 | 0.5822 | 11.312 | 6.135  | 11.539 | 8.306  | 11.122 |
| 7 | 0.5832 | 14.431 | 9.389  | 17.588 | 10.094 | 9.588  |
| 7 | 0.5842 | 19.235 | 18.235 | 25.319 | 14.254 | 18.431 |
| 7 | 0.5852 | 12.244 | 13.849 | 20.382 | 12.774 | 17.523 |
| 7 | 0.5862 | 19.425 | 19.853 | 16.817 | 6.401  | 8.820  |
| 7 | 0.5872 | 20.876 | 13.963 | 17.443 | 13.594 | 9.744  |
| 7 | 0.5882 | 8.688  | 9.114  | 7.377  | 8.504  | 4.699  |
| 7 | 0.5892 | 35.952 | 21.061 | 19.000 | 6.368  | 9.415  |
| 7 | 0.5902 | 27.738 | 13.510 | 20.522 | 2.166  | 8.160  |
| 7 | 0.5912 | 16.975 | 8.713  | 13.541 | 7.654  | 9.294  |
| 7 | 0.5922 | 9.259  | 6.227  | 8.313  | 7.097  | 7.812  |
| 7 | 0.5932 | 14.086 | 15.118 | 16.478 | 14.786 | 9.769  |
| 7 | 0.5942 | 10.909 | 8.900  | 13.625 | 12.513 | 20.471 |
| 7 | 0.5952 | 15.502 | 10.785 | 13.717 | 11.835 | 6.734  |
| 7 | 0.5962 | 18.107 | 16.591 | 17.907 | 11.006 | 14.371 |
| 7 | 0.5972 | 11.299 | 7.149  | 9.931  | 4.621  | 8.954  |
| 7 | 0.5982 | 18.837 | 20.322 | 20.886 | 10.584 | 7.958  |
| 7 | 0.5992 | 19.275 | 18.440 | 20.225 | 7.158  | 13.210 |
| 7 | 0.6002 | 24.244 | 18.802 | 26.898 | 11.987 | 11.817 |
| 7 | 0.6012 | 26.993 | 23.787 | 29.760 | 11.062 | 14.596 |
| 7 | 0.6022 | 24.158 | 27.260 | 25.209 | 13.692 | 14.106 |
| 7 | 0.6032 | 18.128 | 16.170 | 20.935 | 17.460 | 12.958 |
| 7 | 0.6042 | 13.652 | 5.484  | 13.895 | 11.589 | 12.487 |
| 7 | 0.6052 | 7.096  | 4.747  | 11.060 | 7.321  | 6.023  |
| 7 | 0.6062 | 6.729  | 8.149  | 8.886  | 9.746  | 5.413  |
| 7 | 0.6072 | 10.943 | 11.477 | 12.048 | 10.459 | 12.034 |
| 7 | 0.6082 | 28.633 | 17.256 | 19.405 | 15.445 | 10.816 |
| 7 | 0.6092 | 29.395 | 24.800 | 22.464 | 15.076 | 8.172  |
| 7 | 0.6102 | 18.650 | 19.028 | 21.491 | 8.751  | 4.998  |



|   |        |        |        |        |        |        |
|---|--------|--------|--------|--------|--------|--------|
| 7 | 0.6112 | 16.448 | 12.107 | 17.306 | 10.846 | 11.307 |
| 7 | 0.6122 | 16.273 | 12.761 | 16.313 | 5.629  | 5.131  |
| 7 | 0.6132 | 15.281 | 12.195 | 16.217 | 5.740  | 4.597  |
| 7 | 0.6142 | 24.231 | 23.112 | 28.175 | 16.555 | 7.660  |
| 7 | 0.6152 | 10.042 | 16.092 | 17.774 | 11.433 | 10.732 |
| 7 | 0.6162 | 13.654 | 14.123 | 22.913 | 11.490 | 17.562 |
| 7 | 0.6172 | 23.694 | 26.311 | 27.647 | 10.940 | 11.749 |
| 7 | 0.6182 | 6.930  | 11.080 | 10.518 | 12.669 | 11.181 |
| 7 | 0.6192 | 13.912 | 10.159 | 12.233 | 6.058  | 8.727  |
| 7 | 0.6202 | 8.285  | 5.723  | 10.403 | 6.999  | 9.170  |
| 7 | 0.6212 | 10.904 | 11.591 | 18.225 | 3.914  | 8.075  |
| 7 | 0.6222 | 16.305 | 16.988 | 15.065 | 6.057  | 5.300  |
| 7 | 0.6232 | 9.700  | 14.040 | 12.479 | 3.983  | 4.129  |
| 7 | 0.6242 | 15.540 | 24.426 | 19.626 | 9.482  | 3.964  |
| 7 | 0.6252 | 8.544  | 7.771  | 8.970  | 9.069  | 4.113  |
| 7 | 0.6262 | 6.661  | 2.142  | 2.185  | 7.776  | 9.031  |
| 7 | 0.6272 | 13.468 | 16.110 | 16.081 | 7.627  | 6.753  |
| 7 | 0.6282 | 13.208 | 11.640 | 15.032 | 6.486  | 12.970 |
| 7 | 0.6292 | 20.217 | 13.057 | 17.024 | 10.255 | 18.098 |
| 7 | 0.6302 | 9.105  | 4.769  | 8.857  | 8.840  | 13.012 |
| 7 | 0.6312 | 13.228 | 11.507 | 12.987 | 6.263  | 15.290 |
| 7 | 0.6322 | 9.746  | 4.562  | 11.629 | 15.779 | 22.242 |
| 7 | 0.6332 | 16.817 | 9.058  | 12.400 | 16.505 | 23.804 |
| 7 | 0.6342 | 11.612 | 8.171  | 9.053  | 8.510  | 16.767 |
| 7 | 0.6352 | 16.234 | 14.214 | 12.668 | 14.609 | 14.673 |
| 7 | 0.6362 | 11.736 | 6.063  | 9.675  | 6.138  | 17.678 |
| 7 | 0.6372 | 17.070 | 7.339  | 14.295 | 15.825 | 12.328 |
| 7 | 0.6382 | 14.587 | 6.010  | 10.604 | 16.979 | 11.923 |
| 7 | 0.6392 | 18.228 | 7.560  | 12.132 | 8.683  | 12.078 |
| 7 | 0.6402 | 18.344 | 15.372 | 15.029 | 4.587  | 15.208 |
| 7 | 0.6412 | 22.437 | 22.543 | 20.501 | 10.820 | 14.578 |
| 7 | 0.6422 | 20.192 | 17.607 | 16.132 | 12.256 | 12.917 |
| 7 | 0.6432 | 17.849 | 11.453 | 13.802 | 12.685 | 22.257 |
| 7 | 0.6442 | 17.497 | 11.307 | 13.447 | 12.679 | 22.318 |
| 7 | 0.6452 | 15.041 | 14.835 | 14.934 | 10.139 | 17.745 |
| 7 | 0.6462 | 16.802 | 18.410 | 16.227 | 9.640  | 26.224 |
| 7 | 0.6472 | 14.831 | 13.051 | 11.419 | 5.673  | 21.439 |
| 7 | 0.6482 | 14.305 | 12.919 | 9.965  | 10.681 | 19.609 |
| 7 | 0.6492 | 14.825 | 9.675  | 12.070 | 13.552 | 13.490 |
| 7 | 0.6502 | 22.377 | 13.731 | 15.372 | 9.739  | 17.681 |
| 7 | 0.6512 | 25.984 | 18.869 | 15.252 | 12.071 | 17.067 |
| 7 | 0.6522 | 4.554  | 5.119  | 6.972  | 17.703 | 20.338 |
| 7 | 0.6532 | 4.915  | 8.745  | 6.842  | 21.593 | 22.600 |
| 7 | 0.6542 | 13.842 | 12.041 | 14.209 | 6.162  | 19.827 |
| 7 | 0.6552 | 11.529 | 11.809 | 11.396 | 5.054  | 9.066  |
| 7 | 0.6562 | 14.534 | 14.379 | 14.480 | 3.902  | 13.078 |
| 7 | 0.6572 | 6.749  | 7.126  | 7.273  | 1.979  | 8.714  |
| 7 | 0.6582 | 15.091 | 14.356 | 14.967 | 4.469  | 18.117 |
| 7 | 0.6592 | 20.531 | 18.945 | 14.582 | 9.228  | 22.175 |
| 7 | 0.6602 | 18.428 | 18.832 | 14.928 | 6.870  | 23.567 |

|   |        |        |        |        |        |        |
|---|--------|--------|--------|--------|--------|--------|
| 7 | 0.6612 | 17.307 | 19.280 | 12.559 | 13.927 | 25.278 |
| 7 | 0.6622 | 29.059 | 34.671 | 23.476 | 14.252 | 18.881 |
| 7 | 0.6632 | 21.114 | 21.202 | 18.398 | 11.183 | 16.231 |
| 7 | 0.6642 | 35.948 | 23.405 | 26.706 | 11.286 | 13.213 |
| 7 | 0.6652 | 9.472  | 9.010  | 12.545 | 6.283  | 4.436  |
| 7 | 0.6662 | 12.850 | 13.628 | 10.681 | 11.954 | 8.905  |
| 7 | 0.6672 | 14.703 | 11.573 | 14.005 | 10.417 | 14.484 |
| 7 | 0.6682 | 24.326 | 19.906 | 21.530 | 11.495 | 12.889 |
| 7 | 0.6692 | 21.877 | 16.851 | 17.284 | 11.760 | 13.501 |
| 7 | 0.6702 | 24.657 | 19.542 | 20.701 | 13.360 | 18.425 |
| 7 | 0.6712 | 11.172 | 10.744 | 16.056 | 7.199  | 16.743 |
| 7 | 0.6722 | 9.737  | 12.107 | 8.137  | 8.040  | 9.528  |
| 7 | 0.6732 | 9.759  | 12.151 | 8.207  | 8.058  | 9.476  |
| 7 | 0.6742 | 22.571 | 21.594 | 13.006 | 15.641 | 21.764 |
| 7 | 0.6752 | 24.608 | 19.303 | 16.078 | 11.068 | 21.440 |
| 7 | 0.6762 | 21.733 | 21.300 | 15.002 | 14.512 | 21.322 |
| 7 | 0.6772 | 33.135 | 19.901 | 27.555 | 12.118 | 17.487 |
| 7 | 0.6782 | 33.131 | 19.730 | 27.504 | 12.159 | 17.427 |
| 7 | 0.6792 | 30.751 | 21.316 | 23.765 | 20.047 | 21.653 |
| 7 | 0.6802 | 22.345 | 13.814 | 10.267 | 11.368 | 21.125 |
| 7 | 0.6812 | 24.252 | 15.798 | 16.129 | 6.161  | 18.147 |
| 7 | 0.6822 | 25.598 | 16.478 | 18.253 | 7.650  | 13.391 |
| 7 | 0.6832 | 7.237  | 8.934  | 7.203  | 6.535  | 13.403 |
| 7 | 0.6842 | 14.746 | 10.156 | 10.816 | 20.711 | 14.560 |
| 7 | 0.6852 | 18.318 | 8.949  | 9.272  | 15.353 | 16.167 |
| 7 | 0.6862 | 12.835 | 9.580  | 10.829 | 17.426 | 15.092 |
| 7 | 0.6872 | 32.144 | 13.361 | 15.025 | 12.060 | 17.208 |
| 7 | 0.6882 | 16.873 | 12.485 | 14.244 | 10.838 | 13.793 |
| 7 | 0.6892 | 5.773  | 4.791  | 5.951  | 1.338  | 11.485 |
| 7 | 0.6902 | 12.752 | 9.106  | 7.099  | 10.586 | 9.201  |
| 7 | 0.6912 | 13.091 | 5.290  | 9.935  | 11.284 | 20.511 |
| 7 | 0.6922 | 16.039 | 9.819  | 13.759 | 16.906 | 20.760 |
| 7 | 0.6932 | 21.610 | 22.794 | 15.819 | 13.090 | 24.540 |
| 7 | 0.6942 | 20.148 | 9.426  | 14.855 | 9.439  | 18.941 |
| 7 | 0.6952 | 18.848 | 10.985 | 10.438 | 9.362  | 20.337 |
| 7 | 0.6962 | 18.793 | 14.618 | 10.055 | 13.250 | 17.614 |
| 7 | 0.6972 | 32.497 | 21.167 | 24.368 | 12.398 | 15.253 |
| 7 | 0.6982 | 14.332 | 13.855 | 11.291 | 5.105  | 15.206 |
| 7 | 0.6992 | 6.239  | 8.399  | 6.251  | 8.993  | 17.658 |
| 7 | 0.7002 | 20.264 | 15.129 | 12.070 | 13.316 | 21.134 |
| 7 | 0.7012 | 19.436 | 8.697  | 10.703 | 13.867 | 28.293 |
| 7 | 0.7022 | 7.555  | 10.945 | 9.730  | 10.717 | 16.235 |
| 7 | 0.7032 | 21.132 | 23.014 | 14.112 | 9.792  | 12.384 |
| 7 | 0.7042 | 28.653 | 13.452 | 21.996 | 13.898 | 14.010 |
| 7 | 0.7052 | 28.574 | 13.405 | 21.925 | 13.894 | 13.997 |
| 7 | 0.7062 | 25.264 | 15.148 | 23.765 | 19.744 | 16.864 |
| 7 | 0.7072 | 21.437 | 19.106 | 14.139 | 11.825 | 17.157 |
| 7 | 0.7082 | 14.790 | 14.551 | 9.688  | 8.434  | 21.657 |
| 7 | 0.7092 | 14.691 | 14.514 | 9.636  | 8.296  | 21.500 |
| 7 | 0.7102 | 23.400 | 21.695 | 16.654 | 7.318  | 15.466 |

|   |        |        |        |        |        |        |
|---|--------|--------|--------|--------|--------|--------|
| 7 | 0.7112 | 17.774 | 15.340 | 15.181 | 15.692 | 11.391 |
| 7 | 0.7122 | 19.258 | 16.034 | 16.655 | 6.152  | 13.791 |
| 7 | 0.7132 | 22.946 | 23.506 | 21.148 | 13.406 | 18.482 |
| 7 | 0.7142 | 16.959 | 10.550 | 10.315 | 8.942  | 10.904 |
| 7 | 0.7152 | 18.425 | 14.562 | 17.344 | 9.541  | 10.066 |
| 7 | 0.7162 | 25.683 | 15.940 | 20.271 | 9.517  | 8.106  |
| 7 | 0.7172 | 19.203 | 12.107 | 15.889 | 10.452 | 4.112  |
| 7 | 0.7182 | 20.877 | 14.954 | 18.803 | 20.117 | 7.470  |
| 7 | 0.7192 | 38.416 | 15.066 | 19.306 | 10.585 | 8.438  |
| 7 | 0.7202 | 17.390 | 12.213 | 14.548 | 13.203 | 13.930 |
| 7 | 0.7212 | 52.223 | 15.779 | 32.117 | 16.067 | 9.288  |
| 7 | 0.7222 | 24.329 | 15.002 | 18.189 | 26.420 | 22.476 |
| 7 | 0.7232 | 21.233 | 11.621 | 16.781 | 10.420 | 6.778  |
| 7 | 0.7242 | 15.764 | 14.925 | 12.149 | 17.374 | 7.877  |
| 7 | 0.7252 | 13.461 | 10.284 | 12.552 | 10.613 | 8.580  |
| 7 | 0.7262 | 6.266  | 6.873  | 5.164  | 3.953  | 0.949  |
| 7 | 0.7272 | 7.881  | 5.806  | 3.385  | 6.808  | 2.422  |
| 7 | 0.7282 | 17.136 | 15.673 | 13.517 | 12.510 | 13.030 |
| 7 | 0.7292 | 16.548 | 16.931 | 17.299 | 11.239 | 7.305  |
| 7 | 0.7302 | 16.744 | 17.354 | 15.786 | 14.889 | 7.140  |
| 7 | 0.7312 | 20.480 | 17.930 | 16.273 | 13.846 | 12.454 |
| 7 | 0.7322 | 17.024 | 17.544 | 14.528 | 11.536 | 9.470  |
| 7 | 0.7332 | 7.357  | 10.280 | 8.902  | 21.101 | 10.472 |
| 7 | 0.7342 | 17.678 | 13.844 | 19.345 | 7.951  | 4.485  |
| 7 | 0.7352 | 16.891 | 12.800 | 18.501 | 8.948  | 6.679  |
| 7 | 0.7362 | 8.326  | 7.569  | 9.245  | 12.065 | 9.765  |
| 7 | 0.7372 | 8.245  | 10.400 | 7.599  | 12.916 | 9.920  |
| 7 | 0.7382 | 8.753  | 9.449  | 12.293 | 7.389  | 7.968  |
| 7 | 0.7392 | 10.412 | 17.313 | 12.928 | 14.137 | 12.187 |
| 7 | 0.7402 | 8.005  | 9.563  | 8.578  | 11.352 | 5.190  |
| 7 | 0.7412 | 17.567 | 15.630 | 21.086 | 6.872  | 10.310 |
| 7 | 0.7422 | 7.120  | 8.296  | 8.603  | 8.697  | 8.828  |
| 7 | 0.7432 | 6.264  | 5.178  | 7.179  | 13.923 | 13.469 |
| 7 | 0.7442 | 13.622 | 15.446 | 13.323 | 13.853 | 8.341  |
| 7 | 0.7452 | 9.043  | 7.272  | 6.159  | 9.484  | 4.203  |
| 7 | 0.7462 | 10.610 | 5.899  | 6.618  | 16.043 | 7.953  |
| 7 | 0.7472 | 4.741  | 3.141  | 4.750  | 4.683  | 8.509  |
| 7 | 0.7482 | 12.377 | 13.463 | 16.653 | 9.609  | 14.456 |
| 7 | 0.7492 | 10.949 | 13.445 | 15.193 | 6.781  | 13.491 |
| 7 | 0.7502 | 12.077 | 12.381 | 17.693 | 5.942  | 12.059 |
| 7 | 0.7512 | 6.791  | 10.668 | 8.246  | 9.674  | 10.763 |
| 7 | 0.7522 | 13.985 | 12.880 | 12.526 | 10.971 | 14.346 |
| 7 | 0.7532 | 18.298 | 14.695 | 18.526 | 15.105 | 6.912  |
| 7 | 0.7542 | 10.600 | 6.843  | 7.898  | 9.270  | 9.870  |
| 7 | 0.7552 | 20.010 | 21.402 | 22.938 | 8.844  | 11.375 |
| 7 | 0.7562 | 15.966 | 14.707 | 22.177 | 9.759  | 14.941 |
| 7 | 0.7572 | 16.694 | 11.323 | 18.406 | 11.717 | 13.853 |
| 7 | 0.7582 | 9.170  | 15.843 | 8.736  | 22.114 | 9.320  |
| 7 | 0.7592 | 14.711 | 13.002 | 14.107 | 21.267 | 10.799 |
| 7 | 0.7602 | 13.969 | 12.070 | 14.198 | 12.508 | 10.677 |

|   |        |        |        |        |        |        |
|---|--------|--------|--------|--------|--------|--------|
| 7 | 0.7612 | 15.348 | 8.932  | 12.340 | 8.879  | 13.514 |
| 7 | 0.7622 | 18.131 | 17.310 | 16.425 | 16.468 | 11.720 |
| 7 | 0.7632 | 9.228  | 9.189  | 8.442  | 19.556 | 10.480 |
| 7 | 0.7642 | 13.470 | 11.583 | 13.675 | 11.580 | 12.360 |
| 7 | 0.7652 | 14.162 | 9.184  | 18.924 | 10.550 | 7.994  |
| 7 | 0.7662 | 14.353 | 9.063  | 14.462 | 5.658  | 10.240 |
| 7 | 0.7672 | 15.127 | 12.152 | 12.486 | 6.447  | 8.844  |
| 7 | 0.7682 | 21.344 | 19.825 | 19.019 | 6.703  | 13.528 |
| 7 | 0.7692 | 21.183 | 22.191 | 22.585 | 6.759  | 6.791  |
| 7 | 0.7702 | 10.794 | 14.690 | 17.316 | 7.081  | 6.355  |
| 7 | 0.7712 | 16.607 | 14.751 | 16.762 | 16.958 | 10.293 |
| 7 | 0.7722 | 22.858 | 17.675 | 21.274 | 15.636 | 12.296 |
| 7 | 0.7732 | 12.003 | 11.898 | 14.981 | 13.536 | 8.360  |
| 7 | 0.7742 | 13.207 | 18.490 | 14.240 | 22.090 | 5.070  |
| 7 | 0.7752 | 11.472 | 14.360 | 11.123 | 14.028 | 10.271 |
| 7 | 0.7762 | 7.489  | 6.636  | 9.527  | 7.902  | 7.678  |
| 7 | 0.7772 | 8.549  | 7.441  | 8.357  | 15.368 | 7.392  |
| 7 | 0.7782 | 12.574 | 18.753 | 16.560 | 20.904 | 12.323 |
| 7 | 0.7792 | 15.399 | 21.322 | 19.623 | 19.517 | 14.258 |
| 7 | 0.7802 | 8.755  | 12.581 | 12.198 | 14.129 | 9.881  |
| 7 | 0.7812 | 9.008  | 9.462  | 7.533  | 7.436  | 12.123 |
| 7 | 0.7822 | 17.500 | 18.210 | 19.295 | 8.572  | 9.012  |
| 7 | 0.7832 | 11.895 | 16.116 | 11.205 | 12.570 | 7.468  |
| 7 | 0.7842 | 19.472 | 23.960 | 18.642 | 17.674 | 16.227 |
| 7 | 0.7852 | 11.139 | 16.961 | 18.308 | 13.633 | 14.305 |
| 7 | 0.7862 | 17.840 | 14.336 | 22.980 | 13.531 | 14.022 |
| 7 | 0.7872 | 10.620 | 11.869 | 17.053 | 12.241 | 15.413 |
| 7 | 0.7882 | 8.396  | 13.401 | 13.922 | 9.002  | 13.101 |
| 7 | 0.7892 | 16.014 | 16.535 | 21.179 | 8.163  | 20.523 |
| 7 | 0.7902 | 16.358 | 17.444 | 21.120 | 12.041 | 11.232 |
| 7 | 0.7912 | 15.813 | 22.878 | 20.515 | 17.820 | 9.075  |
| 7 | 0.7922 | 11.323 | 20.350 | 12.381 | 18.978 | 9.814  |
| 7 | 0.7932 | 22.069 | 25.432 | 18.356 | 16.645 | 14.466 |
| 7 | 0.7942 | 8.759  | 10.613 | 10.481 | 6.509  | 8.196  |
| 7 | 0.7952 | 11.574 | 8.664  | 10.939 | 6.899  | 14.176 |
| 7 | 0.7962 | 17.630 | 18.658 | 17.541 | 13.721 | 15.304 |
| 7 | 0.7972 | 9.498  | 13.323 | 8.529  | 9.668  | 13.398 |
| 7 | 0.7982 | 11.294 | 14.515 | 16.235 | 12.402 | 5.949  |
| 7 | 0.7992 | 18.229 | 17.073 | 21.451 | 19.431 | 12.211 |
| 7 | 0.8002 | 15.251 | 19.829 | 16.938 | 22.093 | 14.165 |
| 7 | 0.8012 | 17.431 | 19.657 | 21.894 | 18.211 | 13.303 |
| 7 | 0.8022 | 9.721  | 13.273 | 10.085 | 10.428 | 6.891  |
| 7 | 0.8032 | 13.428 | 11.857 | 12.456 | 12.843 | 10.174 |
| 7 | 0.8042 | 14.557 | 13.679 | 14.098 | 1.192  | 0.418  |
| 7 | 0.8052 | 19.638 | 20.582 | 19.059 | 7.466  | 8.659  |
| 7 | 0.8062 | 9.324  | 18.193 | 14.645 | 22.271 | 8.819  |
| 7 | 0.8072 | 10.866 | 12.796 | 10.809 | 9.619  | 6.091  |
| 7 | 0.8082 | 9.820  | 17.543 | 15.353 | 11.802 | 10.144 |
| 7 | 0.8092 | 13.251 | 16.287 | 13.467 | 10.693 | 3.975  |
| 7 | 0.8102 | 9.971  | 13.918 | 8.559  | 13.109 | 7.190  |

|   |        |        |        |        |        |        |
|---|--------|--------|--------|--------|--------|--------|
| 7 | 0.8112 | 2.029  | 3.517  | 2.252  | 4.588  | 5.261  |
| 7 | 0.8122 | 9.869  | 13.381 | 13.563 | 8.206  | 4.697  |
| 7 | 0.8132 | 18.681 | 16.166 | 12.964 | 12.592 | 7.745  |
| 7 | 0.8142 | 7.275  | 11.188 | 7.369  | 15.081 | 15.371 |
| 7 | 0.8152 | 12.762 | 15.169 | 10.544 | 8.456  | 11.947 |
| 7 | 0.8162 | 13.070 | 12.368 | 14.112 | 7.124  | 5.793  |
| 7 | 0.8172 | 12.353 | 16.275 | 14.945 | 13.451 | 10.547 |
| 7 | 0.8182 | 17.602 | 15.621 | 24.115 | 8.845  | 5.291  |
| 7 | 0.8192 | 17.755 | 18.613 | 21.589 | 26.431 | 9.784  |
| 7 | 0.8202 | 5.275  | 10.927 | 8.028  | 7.339  | 3.482  |
| 7 | 0.8212 | 7.813  | 10.330 | 7.587  | 10.078 | 6.540  |
| 7 | 0.8222 | 15.563 | 18.001 | 16.102 | 7.051  | 5.307  |
| 7 | 0.8232 | 16.667 | 19.583 | 17.596 | 12.214 | 6.739  |
| 7 | 0.8242 | 17.268 | 23.188 | 24.293 | 15.254 | 9.583  |
| 7 | 0.8252 | 15.022 | 17.381 | 15.967 | 12.823 | 7.069  |
| 7 | 0.8262 | 14.533 | 20.691 | 17.539 | 11.122 | 8.143  |
| 7 | 0.8272 | 17.541 | 18.368 | 17.377 | 10.413 | 9.242  |
| 7 | 0.8282 | 24.679 | 16.951 | 21.662 | 18.856 | 7.500  |
| 7 | 0.8292 | 24.678 | 16.949 | 21.662 | 18.861 | 7.498  |
| 7 | 0.8302 | 19.288 | 21.923 | 17.607 | 15.541 | 13.106 |
| 7 | 0.8312 | 16.790 | 15.858 | 12.980 | 13.673 | 9.824  |
| 7 | 0.8322 | 17.251 | 17.018 | 18.196 | 12.187 | 9.203  |
| 7 | 0.8332 | 7.993  | 5.512  | 5.335  | 5.507  | 1.630  |
| 7 | 0.8342 | 6.882  | 9.981  | 6.736  | 5.793  | 3.176  |
| 7 | 0.8352 | 6.872  | 9.928  | 6.703  | 5.793  | 3.179  |
| 7 | 0.8362 | 14.979 | 13.948 | 12.028 | 11.570 | 6.604  |
| 7 | 0.8372 | 2.840  | 6.506  | 5.303  | 7.461  | 3.605  |
| 7 | 0.8382 | 11.412 | 16.108 | 15.043 | 13.016 | 7.224  |
| 7 | 0.8392 | 14.272 | 13.738 | 13.921 | 9.744  | 8.582  |
| 7 | 0.8402 | 17.227 | 21.579 | 19.127 | 12.856 | 11.981 |
| 7 | 0.8412 | 21.823 | 29.027 | 32.951 | 13.406 | 10.920 |
| 7 | 0.8422 | 12.609 | 12.762 | 18.211 | 7.061  | 7.176  |
| 7 | 0.8432 | 7.485  | 7.729  | 7.545  | 3.604  | 9.656  |
| 7 | 0.8442 | 6.293  | 8.668  | 5.120  | 3.956  | 18.691 |
| 7 | 0.8452 | 14.108 | 22.216 | 16.948 | 11.329 | 15.320 |
| 7 | 0.8462 | 14.042 | 22.151 | 16.947 | 11.334 | 15.293 |
| 7 | 0.8472 | 15.759 | 19.211 | 15.713 | 7.877  | 17.699 |
| 7 | 0.8482 | 10.703 | 21.606 | 16.042 | 12.304 | 11.052 |
| 7 | 0.8492 | 10.742 | 17.002 | 18.820 | 13.352 | 14.237 |
| 7 | 0.8502 | 11.172 | 18.688 | 20.221 | 18.764 | 17.587 |
| 7 | 0.8512 | 9.953  | 11.623 | 12.271 | 21.360 | 21.275 |
| 7 | 0.8522 | 9.942  | 11.700 | 12.332 | 21.492 | 21.439 |
| 7 | 0.8532 | 9.935  | 11.780 | 12.400 | 21.627 | 21.605 |
| 7 | 0.8542 | 9.932  | 11.863 | 12.475 | 21.764 | 21.769 |
| 7 | 0.8552 | 18.882 | 22.222 | 17.505 | 20.655 | 20.009 |
| 7 | 0.8562 | 17.518 | 19.044 | 18.403 | 17.753 | 20.426 |
| 7 | 0.8572 | 27.364 | 28.587 | 35.870 | 12.248 | 11.500 |
| 7 | 0.8582 | 22.617 | 19.439 | 24.918 | 5.906  | 7.259  |
| 7 | 0.8592 | 9.458  | 8.546  | 7.276  | 4.757  | 3.318  |
| 7 | 0.8602 | 11.616 | 10.544 | 14.461 | 5.351  | 8.089  |

|   |        |        |        |        |        |        |
|---|--------|--------|--------|--------|--------|--------|
| 7 | 0.8612 | 12.019 | 16.511 | 18.165 | 20.074 | 9.777  |
| 7 | 0.8622 | 11.935 | 16.554 | 18.162 | 20.068 | 9.761  |
| 7 | 0.8632 | 17.322 | 14.635 | 17.650 | 7.466  | 14.331 |
| 7 | 0.8642 | 16.002 | 15.634 | 14.059 | 9.934  | 12.168 |
| 7 | 0.8652 | 13.970 | 15.183 | 16.091 | 8.573  | 8.719  |
| 7 | 0.8662 | 17.440 | 16.153 | 20.829 | 13.436 | 8.726  |
| 7 | 0.8672 | 18.781 | 17.132 | 21.198 | 13.453 | 6.857  |
| 7 | 0.8682 | 21.944 | 23.994 | 26.668 | 8.941  | 10.730 |
| 7 | 0.8692 | 23.296 | 25.185 | 26.823 | 9.361  | 12.367 |
| 7 | 0.8702 | 22.299 | 25.433 | 28.023 | 16.209 | 6.670  |
| 7 | 0.8712 | 16.575 | 22.584 | 24.059 | 9.178  | 4.244  |
| 7 | 0.8722 | 17.014 | 19.744 | 24.366 | 10.817 | 6.011  |
| 7 | 0.8732 | 17.249 | 23.350 | 23.905 | 9.607  | 9.273  |
| 7 | 0.8742 | 12.119 | 13.538 | 19.128 | 16.259 | 15.687 |
| 7 | 0.8752 | 6.897  | 6.463  | 11.177 | 5.806  | 8.121  |
| 7 | 0.8762 | 11.770 | 21.526 | 14.440 | 19.063 | 8.994  |
| 7 | 0.8772 | 19.832 | 13.558 | 20.215 | 12.653 | 10.623 |
| 7 | 0.8782 | 29.399 | 19.908 | 30.061 | 12.380 | 17.806 |
| 7 | 0.8792 | 20.882 | 18.146 | 24.702 | 8.475  | 9.682  |
| 7 | 0.8802 | 17.761 | 16.086 | 15.312 | 21.658 | 16.459 |
| 7 | 0.8812 | 8.727  | 6.874  | 5.804  | 16.229 | 14.694 |
| 7 | 0.8822 | 11.344 | 10.466 | 8.785  | 14.104 | 11.944 |
| 7 | 0.8832 | 19.780 | 23.249 | 17.868 | 17.252 | 12.080 |
| 7 | 0.8842 | 20.978 | 22.368 | 20.146 | 19.740 | 15.768 |
| 7 | 0.8852 | 20.660 | 22.148 | 19.354 | 19.493 | 15.641 |
| 7 | 0.8862 | 14.883 | 16.061 | 12.638 | 7.304  | 5.525  |
| 7 | 0.8872 | 15.088 | 22.110 | 19.803 | 8.877  | 14.164 |
| 7 | 0.8882 | 14.971 | 22.235 | 19.641 | 9.039  | 14.071 |
| 7 | 0.8892 | 18.554 | 25.656 | 21.451 | 18.821 | 15.207 |
| 7 | 0.8902 | 4.859  | 6.741  | 7.092  | 5.956  | 2.668  |
| 7 | 0.8912 | 13.916 | 13.717 | 10.593 | 11.401 | 8.777  |
| 7 | 0.8922 | 20.314 | 14.461 | 15.354 | 7.604  | 13.612 |
| 7 | 0.8932 | 11.888 | 12.269 | 12.420 | 10.150 | 25.621 |
| 7 | 0.8942 | 6.000  | 6.986  | 6.102  | 10.701 | 26.760 |
| 7 | 0.8952 | 8.944  | 10.734 | 10.237 | 5.461  | 10.056 |
| 7 | 0.8962 | 16.789 | 20.232 | 22.949 | 16.154 | 18.991 |
| 7 | 0.8972 | 16.260 | 24.041 | 23.025 | 9.356  | 8.678  |
| 7 | 0.8982 | 6.674  | 6.505  | 8.234  | 7.355  | 5.719  |
| 7 | 0.8992 | 5.352  | 5.867  | 5.532  | 14.072 | 8.767  |
| 7 | 0.9002 | 17.568 | 14.646 | 16.415 | 11.075 | 7.715  |
| 7 | 0.9012 | 18.417 | 11.228 | 14.261 | 12.153 | 5.316  |
| 7 | 0.9022 | 16.046 | 15.841 | 16.673 | 14.792 | 15.973 |
| 7 | 0.9032 | 11.932 | 16.412 | 17.543 | 17.392 | 13.255 |
| 7 | 0.9042 | 20.575 | 17.841 | 18.607 | 8.657  | 11.492 |
| 7 | 0.9052 | 34.561 | 26.221 | 38.703 | 10.191 | 12.319 |
| 7 | 0.9062 | 23.497 | 18.585 | 23.960 | 11.708 | 12.302 |
| 7 | 0.9072 | 12.624 | 14.281 | 11.763 | 13.560 | 12.358 |
| 7 | 0.9082 | 12.807 | 9.450  | 10.026 | 9.545  | 10.590 |
| 7 | 0.9092 | 13.743 | 9.343  | 10.886 | 14.163 | 11.997 |
| 7 | 0.9102 | 24.187 | 14.274 | 20.019 | 15.840 | 12.798 |

|   |        |        |        |        |        |        |
|---|--------|--------|--------|--------|--------|--------|
| 7 | 0.9112 | 16.305 | 15.300 | 20.173 | 9.725  | 12.029 |
| 7 | 0.9122 | 21.066 | 14.783 | 21.611 | 19.552 | 11.583 |
| 7 | 0.9132 | 16.752 | 23.592 | 20.228 | 12.774 | 17.710 |
| 7 | 0.9142 | 10.818 | 14.500 | 13.960 | 8.505  | 11.463 |
| 7 | 0.9152 | 14.191 | 15.936 | 18.035 | 12.550 | 14.197 |
| 7 | 0.9162 | 17.879 | 11.619 | 13.315 | 9.027  | 9.223  |
| 7 | 0.9172 | 8.257  | 12.317 | 11.871 | 7.620  | 10.702 |
| 7 | 0.9182 | 13.781 | 9.378  | 8.353  | 6.556  | 10.844 |
| 7 | 0.9192 | 13.949 | 9.547  | 8.482  | 6.568  | 10.770 |
| 7 | 0.9202 | 22.374 | 18.927 | 16.555 | 22.964 | 16.001 |
| 7 | 0.9212 | 11.134 | 10.388 | 8.842  | 14.164 | 15.173 |
| 7 | 0.9222 | 11.089 | 7.286  | 12.384 | 11.573 | 12.407 |
| 7 | 0.9232 | 14.597 | 11.276 | 12.584 | 20.209 | 28.037 |
| 7 | 0.9242 | 5.938  | 6.676  | 7.720  | 18.621 | 21.920 |
| 7 | 0.9252 | 13.289 | 8.211  | 10.647 | 21.544 | 27.817 |
| 7 | 0.9262 | 13.627 | 5.979  | 15.814 | 20.013 | 9.411  |
| 7 | 0.9272 | 14.041 | 12.206 | 15.872 | 12.741 | 7.640  |
| 7 | 0.9282 | 9.863  | 10.025 | 10.737 | 12.824 | 11.825 |
| 7 | 0.9292 | 10.591 | 5.924  | 7.981  | 7.552  | 7.733  |
| 7 | 0.9302 | 9.196  | 5.526  | 9.769  | 8.287  | 10.007 |
| 7 | 0.9312 | 5.823  | 6.319  | 9.117  | 4.382  | 12.291 |
| 7 | 0.9322 | 27.391 | 20.787 | 22.645 | 12.829 | 14.086 |
| 7 | 0.9332 | 28.476 | 19.292 | 23.522 | 13.141 | 15.939 |
| 7 | 0.9342 | 18.073 | 15.119 | 17.821 | 11.916 | 10.184 |
| 7 | 0.9352 | 24.393 | 17.081 | 20.109 | 9.633  | 13.305 |
| 7 | 0.9362 | 11.645 | 11.647 | 12.734 | 7.969  | 9.768  |
| 7 | 0.9372 | 15.031 | 13.090 | 16.029 | 6.742  | 6.669  |
| 7 | 0.9382 | 17.212 | 7.908  | 11.626 | 9.664  | 16.239 |
| 7 | 0.9392 | 15.616 | 8.395  | 9.773  | 6.626  | 5.237  |
| 7 | 0.9402 | 16.415 | 10.446 | 16.656 | 5.728  | 9.408  |
| 7 | 0.9412 | 10.276 | 7.838  | 11.381 | 2.789  | 3.117  |
| 7 | 0.9422 | 12.566 | 15.932 | 12.528 | 14.541 | 9.269  |
| 7 | 0.9432 | 17.344 | 21.856 | 22.074 | 10.920 | 9.532  |
| 7 | 0.9442 | 19.764 | 23.457 | 23.093 | 8.804  | 7.735  |
| 7 | 0.9452 | 33.646 | 29.980 | 33.294 | 13.952 | 12.007 |
| 7 | 0.9462 | 25.601 | 28.959 | 28.100 | 19.900 | 8.187  |
| 7 | 0.9472 | 21.466 | 24.039 | 25.502 | 9.886  | 15.948 |
| 7 | 0.9482 | 28.858 | 16.265 | 17.014 | 6.605  | 12.272 |
| 7 | 0.9492 | 9.520  | 11.329 | 14.960 | 8.617  | 8.952  |
| 7 | 0.9502 | 16.090 | 11.565 | 17.336 | 9.807  | 12.452 |
| 7 | 0.9512 | 5.548  | 7.373  | 13.208 | 6.648  | 10.907 |
| 7 | 0.9522 | 20.719 | 19.614 | 15.145 | 10.519 | 9.229  |
| 7 | 0.9532 | 16.066 | 14.989 | 12.643 | 5.780  | 5.956  |
| 7 | 0.9542 | 8.420  | 7.826  | 11.267 | 8.013  | 21.108 |
| 7 | 0.9552 | 17.850 | 14.552 | 15.730 | 15.639 | 12.573 |
| 7 | 0.9562 | 23.653 | 14.473 | 17.909 | 11.846 | 12.482 |
| 7 | 0.9572 | 16.930 | 16.251 | 16.502 | 7.628  | 8.286  |
| 7 | 0.9582 | 5.963  | 9.849  | 10.408 | 7.551  | 6.697  |
| 7 | 0.9592 | 10.833 | 11.509 | 10.552 | 15.432 | 10.140 |
| 7 | 0.9602 | 18.389 | 19.890 | 18.081 | 13.332 | 13.086 |

|   |        |        |        |        |        |        |
|---|--------|--------|--------|--------|--------|--------|
| 7 | 0.9612 | 22.736 | 18.694 | 18.655 | 10.096 | 7.459  |
| 7 | 0.9622 | 19.576 | 15.588 | 15.799 | 15.530 | 10.154 |
| 7 | 0.9632 | 16.969 | 22.365 | 17.161 | 17.350 | 12.610 |
| 7 | 0.9642 | 21.110 | 24.445 | 22.066 | 16.237 | 13.199 |
| 7 | 0.9652 | 19.707 | 20.524 | 20.457 | 11.743 | 10.032 |
| 7 | 0.9662 | 14.626 | 12.977 | 12.653 | 8.292  | 12.059 |
| 7 | 0.9672 | 15.566 | 13.271 | 15.411 | 15.971 | 11.860 |
| 7 | 0.9682 | 18.168 | 20.966 | 20.835 | 16.393 | 13.902 |
| 7 | 0.9692 | 24.238 | 19.392 | 18.878 | 14.124 | 6.239  |
| 7 | 0.9702 | 13.241 | 10.658 | 10.406 | 11.021 | 6.824  |
| 7 | 0.9712 | 16.362 | 9.949  | 15.913 | 5.789  | 7.277  |
| 7 | 0.9722 | 15.286 | 14.245 | 12.754 | 9.673  | 8.171  |
| 7 | 0.9732 | 15.309 | 14.274 | 12.821 | 9.634  | 8.191  |
| 7 | 0.9742 | 18.163 | 14.623 | 19.940 | 7.858  | 14.714 |
| 7 | 0.9752 | 12.824 | 13.048 | 14.426 | 9.375  | 17.642 |
| 7 | 0.9762 | 11.248 | 12.321 | 16.675 | 8.332  | 14.156 |
| 7 | 0.9772 | 23.251 | 21.271 | 21.714 | 14.123 | 10.868 |
| 7 | 0.9782 | 19.475 | 19.572 | 19.536 | 8.268  | 11.047 |
| 7 | 0.9792 | 10.323 | 11.007 | 12.949 | 10.709 | 10.978 |
| 7 | 0.9802 | 11.254 | 15.283 | 15.263 | 7.297  | 12.750 |
| 7 | 0.9812 | 11.127 | 11.256 | 14.230 | 4.807  | 6.414  |
| 7 | 0.9822 | 7.994  | 8.658  | 10.809 | 5.138  | 11.700 |
| 7 | 0.9832 | 12.612 | 12.458 | 14.859 | 14.212 | 17.367 |
| 7 | 0.9842 | 18.450 | 18.686 | 17.322 | 25.622 | 16.166 |
| 7 | 0.9852 | 16.627 | 15.278 | 16.382 | 13.404 | 10.059 |
| 7 | 0.9862 | 28.190 | 20.565 | 24.502 | 16.914 | 23.523 |
| 7 | 0.9872 | 22.081 | 20.517 | 23.489 | 16.259 | 19.579 |
| 7 | 0.9882 | 13.234 | 14.498 | 12.188 | 14.116 | 15.956 |
| 7 | 0.9892 | 24.545 | 20.215 | 23.404 | 13.000 | 7.781  |
| 7 | 0.9902 | 20.032 | 19.247 | 19.596 | 16.003 | 16.800 |
| 7 | 0.9912 | 18.919 | 23.586 | 23.849 | 12.775 | 17.973 |
| 7 | 0.9922 | 8.253  | 8.998  | 7.986  | 13.124 | 18.700 |
| 7 | 0.9932 | 12.902 | 13.785 | 9.387  | 14.336 | 8.836  |
| 7 | 0.9942 | 15.571 | 9.442  | 8.460  | 10.001 | 8.204  |
| 7 | 0.9952 | 13.900 | 13.046 | 10.516 | 15.253 | 6.746  |
| 7 | 0.9962 | 12.312 | 12.931 | 17.242 | 14.318 | 11.279 |
| 7 | 0.9972 | 16.642 | 20.501 | 23.460 | 20.152 | 12.076 |
| 7 | 0.9982 | 13.853 | 16.115 | 22.168 | 7.977  | 6.856  |
| 7 | 0.9992 | 27.103 | 30.736 | 26.524 | 16.575 | 5.513  |
| 7 | 1.0002 | 16.123 | 14.552 | 9.218  | 10.124 | 11.927 |
| 7 | 1.0012 | 18.316 | 24.055 | 18.771 | 19.784 | 16.614 |
| 7 | 1.0022 | 20.431 | 12.010 | 14.275 | 12.752 | 10.669 |
| 7 | 1.0032 | 25.196 | 15.693 | 16.642 | 25.556 | 22.950 |
| 7 | 1.0042 | 17.820 | 18.484 | 17.219 | 15.278 | 24.169 |
| 7 | 1.0052 | 23.426 | 26.621 | 20.812 | 16.842 | 20.095 |
| 7 | 1.0062 | 19.052 | 18.929 | 16.180 | 13.710 | 8.913  |
| 7 | 1.0072 | 20.423 | 28.441 | 24.053 | 12.949 | 13.003 |
| 7 | 1.0082 | 16.241 | 23.282 | 18.919 | 13.448 | 10.976 |
| 7 | 1.0092 | 21.515 | 22.889 | 18.690 | 12.128 | 19.556 |
| 7 | 1.0102 | 19.678 | 20.889 | 16.521 | 7.308  | 14.055 |



|   |        |        |        |        |        |        |
|---|--------|--------|--------|--------|--------|--------|
| 7 | 1.0112 | 10.832 | 13.688 | 10.671 | 14.188 | 15.841 |
| 7 | 1.0122 | 30.358 | 20.845 | 23.296 | 9.082  | 21.665 |
| 7 | 1.0132 | 7.261  | 9.519  | 15.280 | 5.620  | 2.006  |
| 7 | 1.0142 | 15.201 | 18.984 | 16.865 | 14.161 | 14.307 |
| 7 | 1.0152 | 20.202 | 27.345 | 20.206 | 15.931 | 16.160 |
| 7 | 1.0162 | 27.188 | 30.869 | 25.177 | 15.324 | 13.989 |
| 7 | 1.0172 | 15.118 | 20.761 | 14.140 | 19.781 | 15.917 |
| 7 | 1.0182 | 31.455 | 28.616 | 24.390 | 16.540 | 22.217 |
| 7 | 1.0192 | 29.888 | 21.057 | 20.362 | 10.079 | 16.417 |
| 7 | 1.0202 | 22.846 | 27.697 | 23.337 | 14.908 | 14.318 |
| 7 | 1.0212 | 22.528 | 24.866 | 19.651 | 17.812 | 18.123 |
| 7 | 1.0222 | 18.777 | 15.113 | 15.519 | 7.915  | 14.069 |
| 7 | 1.0232 | 29.025 | 30.815 | 25.604 | 21.343 | 19.761 |
| 7 | 1.0242 | 16.575 | 16.893 | 14.313 | 15.427 | 17.682 |
| 7 | 1.0252 | 10.764 | 16.297 | 12.702 | 24.933 | 6.784  |
| 7 | 1.0262 | 13.304 | 15.296 | 13.602 | 22.061 | 15.681 |
| 7 | 1.0272 | 17.266 | 20.953 | 13.190 | 22.449 | 8.400  |
| 7 | 1.0282 | 18.617 | 19.865 | 16.597 | 18.656 | 11.582 |
| 7 | 1.0292 | 33.361 | 29.234 | 31.065 | 16.265 | 13.117 |
| 7 | 1.0302 | 23.175 | 17.675 | 21.707 | 8.124  | 10.724 |
| 7 | 1.0312 | 13.034 | 15.740 | 15.375 | 6.505  | 11.260 |
| 7 | 1.0322 | 15.465 | 21.059 | 19.510 | 10.957 | 13.327 |
| 7 | 1.0332 | 15.726 | 24.070 | 22.721 | 21.367 | 9.617  |
| 7 | 1.0342 | 15.405 | 19.276 | 14.932 | 15.368 | 11.477 |
| 7 | 1.0352 | 15.790 | 20.642 | 16.275 | 15.536 | 18.921 |
| 7 | 1.0362 | 12.443 | 16.976 | 15.459 | 13.421 | 12.951 |
| 7 | 1.0372 | 10.046 | 13.199 | 11.690 | 11.456 | 9.575  |
| 7 | 1.0382 | 22.264 | 28.394 | 21.641 | 12.299 | 15.928 |
| 7 | 1.0392 | 13.339 | 14.972 | 9.665  | 12.174 | 8.891  |
| 7 | 1.0402 | 18.085 | 19.652 | 13.834 | 6.894  | 12.974 |
| 7 | 1.0412 | 13.041 | 16.419 | 17.043 | 5.630  | 11.991 |
| 7 | 1.0422 | 18.009 | 18.988 | 19.794 | 8.425  | 24.553 |
| 7 | 1.0432 | 12.630 | 18.957 | 13.009 | 10.107 | 12.614 |
| 7 | 1.0442 | 15.286 | 23.980 | 15.918 | 10.117 | 14.880 |
| 7 | 1.0452 | 16.007 | 23.680 | 15.323 | 22.543 | 15.521 |
| 7 | 1.0462 | 19.031 | 19.873 | 15.079 | 9.044  | 18.926 |
| 7 | 1.0472 | 16.941 | 15.355 | 16.887 | 6.263  | 4.489  |
| 7 | 1.0482 | 10.995 | 7.480  | 9.961  | 15.377 | 11.902 |
| 7 | 1.0492 | 25.004 | 16.374 | 21.214 | 14.295 | 9.192  |
| 7 | 1.0502 | 11.823 | 21.573 | 16.478 | 17.781 | 8.789  |
| 7 | 1.0512 | 12.246 | 17.353 | 14.302 | 10.697 | 7.656  |
| 7 | 1.0522 | 17.052 | 22.565 | 15.065 | 21.632 | 17.678 |
| 7 | 1.0532 | 14.229 | 16.895 | 11.382 | 20.744 | 12.668 |
| 7 | 1.0542 | 15.461 | 14.053 | 14.409 | 21.175 | 27.708 |
| 7 | 1.0552 | 20.121 | 18.237 | 22.736 | 10.172 | 19.011 |
| 7 | 1.0562 | 18.564 | 17.741 | 21.137 | 20.584 | 26.270 |
| 7 | 1.0572 | 18.794 | 18.347 | 23.193 | 9.611  | 6.588  |
| 7 | 1.0582 | 14.123 | 12.705 | 11.948 | 17.388 | 18.644 |
| 7 | 1.0592 | 15.802 | 11.511 | 12.050 | 16.163 | 11.577 |
| 7 | 1.0602 | 10.809 | 8.004  | 8.297  | 13.931 | 20.940 |

|   |        |        |        |        |        |        |
|---|--------|--------|--------|--------|--------|--------|
| 7 | 1.0612 | 11.608 | 8.977  | 8.983  | 10.189 | 15.145 |
| 7 | 1.0622 | 10.987 | 11.068 | 8.353  | 7.403  | 8.489  |
| 7 | 1.0632 | 4.521  | 4.771  | 7.579  | 6.329  | 6.829  |
| 7 | 1.0642 | 15.255 | 9.668  | 10.285 | 7.558  | 15.560 |
| 7 | 1.0652 | 0.000  | 0.000  | 0.000  | 0.000  | 0.000  |
| 8 | 0.0004 | 0.000  | 0.000  | 0.000  | 0.000  | 0.000  |
| 8 | 0.0014 | 10.299 | 10.058 | 13.511 | 7.035  | 9.281  |
| 8 | 0.0024 | 10.300 | 10.057 | 13.508 | 7.036  | 9.274  |
| 8 | 0.0034 | 13.205 | 12.160 | 9.940  | 18.566 | 11.607 |
| 8 | 0.0044 | 16.520 | 22.625 | 21.159 | 18.136 | 14.801 |
| 8 | 0.0054 | 31.971 | 36.657 | 40.957 | 14.891 | 9.510  |
| 8 | 0.0064 | 23.147 | 19.729 | 23.840 | 6.288  | 11.098 |
| 8 | 0.0074 | 23.449 | 23.542 | 24.625 | 17.110 | 15.511 |
| 8 | 0.0084 | 13.455 | 10.988 | 10.196 | 11.217 | 7.136  |
| 8 | 0.0094 | 17.682 | 14.590 | 22.959 | 16.505 | 8.418  |
| 8 | 0.0104 | 9.968  | 8.981  | 15.276 | 10.747 | 8.157  |
| 8 | 0.0114 | 15.461 | 20.532 | 25.317 | 8.431  | 7.371  |
| 8 | 0.0124 | 9.397  | 13.909 | 12.539 | 21.893 | 11.535 |
| 8 | 0.0134 | 4.657  | 11.348 | 8.432  | 20.188 | 12.749 |
| 8 | 0.0144 | 12.000 | 13.176 | 16.867 | 11.106 | 10.887 |
| 8 | 0.0154 | 14.762 | 8.734  | 16.817 | 16.865 | 13.362 |
| 8 | 0.0164 | 23.302 | 28.402 | 35.624 | 15.988 | 10.439 |
| 8 | 0.0174 | 27.373 | 21.939 | 35.421 | 11.438 | 20.919 |
| 8 | 0.0184 | 19.912 | 18.826 | 23.261 | 9.946  | 21.698 |
| 8 | 0.0194 | 21.111 | 20.351 | 24.809 | 9.019  | 8.779  |
| 8 | 0.0204 | 21.040 | 27.384 | 31.222 | 8.678  | 6.755  |
| 8 | 0.0214 | 16.975 | 26.149 | 28.098 | 12.239 | 9.057  |
| 8 | 0.0224 | 18.831 | 30.165 | 31.366 | 13.207 | 15.247 |
| 8 | 0.0234 | 12.166 | 12.554 | 9.821  | 9.619  | 14.031 |
| 8 | 0.0244 | 10.785 | 6.923  | 11.793 | 7.119  | 6.549  |
| 8 | 0.0254 | 14.666 | 11.899 | 10.624 | 14.902 | 8.757  |
| 8 | 0.0264 | 12.591 | 12.901 | 19.864 | 13.725 | 7.928  |
| 8 | 0.0274 | 19.535 | 28.119 | 31.573 | 16.981 | 14.361 |
| 8 | 0.0284 | 19.498 | 28.239 | 31.621 | 17.164 | 14.369 |
| 8 | 0.0294 | 21.756 | 23.377 | 25.147 | 25.347 | 15.897 |
| 8 | 0.0304 | 16.082 | 19.774 | 15.980 | 21.049 | 12.518 |
| 8 | 0.0314 | 5.907  | 11.292 | 11.826 | 7.158  | 8.358  |
| 8 | 0.0324 | 16.504 | 25.994 | 20.253 | 14.977 | 5.229  |
| 8 | 0.0334 | 11.509 | 18.378 | 13.021 | 14.400 | 7.670  |
| 8 | 0.0344 | 25.654 | 31.850 | 26.278 | 3.772  | 8.352  |
| 8 | 0.0354 | 20.488 | 31.347 | 26.389 | 18.259 | 20.339 |
| 8 | 0.0364 | 21.251 | 36.528 | 25.115 | 10.244 | 21.140 |
| 8 | 0.0374 | 17.140 | 20.082 | 23.679 | 9.418  | 7.160  |
| 8 | 0.0384 | 12.825 | 13.565 | 10.218 | 9.689  | 9.368  |
| 8 | 0.0394 | 15.312 | 9.526  | 9.742  | 10.364 | 8.722  |
| 8 | 0.0404 | 17.301 | 15.276 | 14.734 | 10.396 | 9.784  |
| 8 | 0.0414 | 16.630 | 16.241 | 13.869 | 16.455 | 10.800 |
| 8 | 0.0424 | 20.437 | 23.421 | 24.721 | 12.176 | 9.287  |
| 8 | 0.0434 | 17.825 | 17.193 | 24.037 | 12.486 | 10.376 |
| 8 | 0.0444 | 14.149 | 22.162 | 25.722 | 12.033 | 8.249  |

|   |        |        |        |        |        |        |
|---|--------|--------|--------|--------|--------|--------|
| 8 | 0.0454 | 7.916  | 15.473 | 15.461 | 12.300 | 5.552  |
| 8 | 0.0464 | 19.200 | 21.981 | 26.999 | 8.203  | 7.444  |
| 8 | 0.0474 | 26.753 | 37.476 | 32.033 | 12.851 | 3.354  |
| 8 | 0.0484 | 11.854 | 19.259 | 19.409 | 13.890 | 17.640 |
| 8 | 0.0494 | 18.069 | 24.385 | 24.247 | 15.140 | 12.979 |
| 8 | 0.0504 | 6.517  | 6.603  | 9.017  | 9.924  | 6.356  |
| 8 | 0.0514 | 11.514 | 15.343 | 20.038 | 10.169 | 6.014  |
| 8 | 0.0524 | 21.264 | 29.153 | 30.556 | 20.225 | 4.853  |
| 8 | 0.0534 | 16.414 | 21.321 | 20.578 | 13.222 | 7.842  |
| 8 | 0.0544 | 18.432 | 27.750 | 27.372 | 10.276 | 3.329  |
| 8 | 0.0554 | 8.766  | 10.990 | 6.816  | 19.217 | 5.228  |
| 8 | 0.0564 | 13.590 | 25.082 | 13.670 | 26.758 | 12.597 |
| 8 | 0.0574 | 23.852 | 26.615 | 18.588 | 27.137 | 14.600 |
| 8 | 0.0584 | 28.431 | 23.297 | 24.145 | 6.971  | 8.451  |
| 8 | 0.0594 | 20.715 | 23.757 | 30.582 | 7.696  | 14.641 |
| 8 | 0.0604 | 26.483 | 31.917 | 39.492 | 8.437  | 11.198 |
| 8 | 0.0614 | 7.644  | 11.674 | 11.716 | 5.427  | 4.015  |
| 8 | 0.0624 | 29.162 | 27.756 | 24.557 | 10.999 | 7.881  |
| 8 | 0.0634 | 16.897 | 18.364 | 21.029 | 6.105  | 13.893 |
| 8 | 0.0644 | 9.743  | 14.465 | 10.744 | 24.392 | 19.290 |
| 8 | 0.0654 | 11.041 | 16.949 | 19.275 | 7.160  | 5.647  |
| 8 | 0.0664 | 18.670 | 23.436 | 23.467 | 7.108  | 12.318 |
| 8 | 0.0674 | 38.572 | 39.965 | 45.773 | 17.990 | 16.673 |
| 8 | 0.0684 | 18.621 | 19.921 | 19.147 | 9.759  | 14.199 |
| 8 | 0.0694 | 15.563 | 14.348 | 12.036 | 5.722  | 12.284 |
| 8 | 0.0704 | 10.867 | 13.984 | 15.554 | 8.965  | 9.956  |
| 8 | 0.0714 | 12.132 | 19.038 | 17.011 | 15.665 | 10.227 |
| 8 | 0.0724 | 16.655 | 26.811 | 22.462 | 14.125 | 8.055  |
| 8 | 0.0734 | 28.719 | 32.298 | 30.975 | 19.307 | 16.784 |
| 8 | 0.0744 | 16.305 | 17.008 | 15.758 | 8.202  | 9.329  |
| 8 | 0.0754 | 27.354 | 19.268 | 25.433 | 15.069 | 20.153 |
| 8 | 0.0764 | 11.479 | 30.590 | 19.569 | 14.465 | 8.882  |
| 8 | 0.0774 | 9.767  | 23.200 | 16.535 | 6.101  | 13.372 |
| 8 | 0.0784 | 15.225 | 23.796 | 17.090 | 17.173 | 13.065 |
| 8 | 0.0794 | 33.090 | 38.550 | 37.764 | 11.743 | 14.076 |
| 8 | 0.0804 | 21.854 | 21.509 | 18.872 | 9.958  | 10.547 |
| 8 | 0.0814 | 9.099  | 13.364 | 11.855 | 15.101 | 20.227 |
| 8 | 0.0824 | 17.426 | 17.610 | 20.855 | 10.469 | 17.163 |
| 8 | 0.0834 | 25.056 | 28.541 | 27.875 | 13.011 | 13.145 |
| 8 | 0.0844 | 23.551 | 25.949 | 29.150 | 11.053 | 13.229 |
| 8 | 0.0854 | 20.862 | 27.281 | 25.418 | 10.157 | 12.991 |
| 8 | 0.0864 | 14.261 | 25.551 | 22.129 | 21.590 | 22.740 |
| 8 | 0.0874 | 9.056  | 11.082 | 19.361 | 6.165  | 15.262 |
| 8 | 0.0884 | 27.247 | 32.930 | 33.592 | 6.379  | 12.557 |
| 8 | 0.0894 | 17.816 | 24.163 | 24.319 | 9.481  | 10.034 |
| 8 | 0.0904 | 16.654 | 16.712 | 23.885 | 17.028 | 13.093 |
| 8 | 0.0914 | 25.868 | 22.474 | 32.400 | 16.696 | 17.592 |
| 8 | 0.0924 | 9.532  | 10.591 | 10.878 | 8.455  | 17.488 |
| 8 | 0.0934 | 15.006 | 15.895 | 14.289 | 14.369 | 13.973 |
| 8 | 0.0944 | 8.998  | 13.838 | 12.354 | 7.649  | 8.660  |

|   |        |        |        |        |        |        |
|---|--------|--------|--------|--------|--------|--------|
| 8 | 0.0954 | 7.988  | 8.890  | 8.843  | 2.874  | 8.018  |
| 8 | 0.0964 | 14.102 | 13.508 | 12.293 | 5.537  | 12.386 |
| 8 | 0.0974 | 15.181 | 16.610 | 13.542 | 5.722  | 16.754 |
| 8 | 0.0984 | 18.547 | 24.753 | 17.312 | 9.389  | 12.967 |
| 8 | 0.0994 | 26.276 | 25.071 | 19.729 | 7.411  | 7.666  |
| 8 | 0.1004 | 14.715 | 17.583 | 18.534 | 9.454  | 14.332 |
| 8 | 0.1014 | 31.651 | 39.230 | 32.934 | 11.836 | 15.978 |
| 8 | 0.1024 | 15.459 | 20.150 | 18.986 | 13.212 | 17.621 |
| 8 | 0.1034 | 16.017 | 15.814 | 17.896 | 10.273 | 6.486  |
| 8 | 0.1044 | 8.245  | 12.906 | 12.441 | 9.130  | 6.941  |
| 8 | 0.1054 | 16.832 | 28.566 | 23.824 | 14.859 | 11.402 |
| 8 | 0.1064 | 23.002 | 36.103 | 28.309 | 20.009 | 7.497  |
| 8 | 0.1074 | 28.607 | 26.598 | 26.945 | 7.041  | 6.977  |
| 8 | 0.1084 | 22.985 | 22.092 | 22.925 | 20.797 | 9.445  |
| 8 | 0.1094 | 20.896 | 21.746 | 20.630 | 15.801 | 7.696  |
| 8 | 0.1104 | 18.659 | 23.951 | 22.027 | 18.481 | 11.951 |
| 8 | 0.1114 | 19.499 | 20.872 | 26.860 | 19.673 | 18.781 |
| 8 | 0.1124 | 15.280 | 20.339 | 17.841 | 23.027 | 13.263 |
| 8 | 0.1134 | 19.267 | 22.564 | 22.288 | 13.913 | 9.338  |
| 8 | 0.1144 | 11.286 | 11.823 | 14.010 | 10.917 | 18.657 |
| 8 | 0.1154 | 12.144 | 12.665 | 17.012 | 14.750 | 21.047 |
| 8 | 0.1164 | 7.756  | 7.665  | 11.711 | 12.726 | 19.883 |
| 8 | 0.1174 | 12.387 | 7.539  | 15.188 | 11.188 | 13.146 |
| 8 | 0.1184 | 14.393 | 7.443  | 13.624 | 8.972  | 11.013 |
| 8 | 0.1194 | 10.475 | 9.665  | 10.829 | 7.887  | 13.928 |
| 8 | 0.1204 | 23.597 | 12.717 | 18.720 | 17.159 | 11.413 |
| 8 | 0.1214 | 21.399 | 11.363 | 16.494 | 15.415 | 9.961  |
| 8 | 0.1224 | 8.773  | 9.698  | 9.892  | 14.290 | 6.606  |
| 8 | 0.1234 | 8.796  | 9.617  | 9.952  | 14.409 | 6.768  |
| 8 | 0.1244 | 12.478 | 7.154  | 14.426 | 10.784 | 6.099  |
| 8 | 0.1254 | 12.442 | 7.088  | 14.485 | 10.750 | 5.997  |
| 8 | 0.1264 | 18.504 | 10.953 | 23.587 | 6.285  | 8.249  |
| 8 | 0.1274 | 15.957 | 13.825 | 15.863 | 7.283  | 7.072  |
| 8 | 0.1284 | 10.812 | 7.733  | 12.371 | 7.028  | 4.366  |
| 8 | 0.1294 | 9.992  | 8.363  | 12.919 | 10.149 | 3.632  |
| 8 | 0.1304 | 3.711  | 4.678  | 7.498  | 14.138 | 10.198 |
| 8 | 0.1314 | 14.954 | 18.379 | 23.886 | 14.891 | 13.728 |
| 8 | 0.1324 | 11.286 | 16.366 | 15.323 | 15.725 | 13.952 |
| 8 | 0.1334 | 11.726 | 10.081 | 13.799 | 12.565 | 9.815  |
| 8 | 0.1344 | 18.509 | 11.885 | 20.165 | 15.502 | 11.407 |
| 8 | 0.1354 | 14.685 | 18.704 | 13.141 | 9.658  | 8.579  |
| 8 | 0.1364 | 10.814 | 15.744 | 12.350 | 12.529 | 7.858  |
| 8 | 0.1374 | 12.492 | 11.928 | 15.078 | 23.099 | 26.484 |
| 8 | 0.1384 | 10.192 | 11.874 | 9.303  | 23.023 | 14.773 |
| 8 | 0.1394 | 13.242 | 13.448 | 14.479 | 21.751 | 21.880 |
| 8 | 0.1404 | 16.875 | 16.661 | 17.606 | 27.938 | 15.250 |
| 8 | 0.1414 | 11.035 | 9.693  | 13.717 | 11.393 | 11.013 |
| 8 | 0.1424 | 19.728 | 21.625 | 23.059 | 20.055 | 10.941 |
| 8 | 0.1434 | 16.249 | 9.393  | 13.397 | 20.646 | 15.362 |
| 8 | 0.1444 | 11.955 | 13.212 | 9.307  | 14.620 | 21.764 |

|   |        |        |        |        |        |        |
|---|--------|--------|--------|--------|--------|--------|
| 8 | 0.1454 | 21.124 | 29.157 | 22.682 | 22.771 | 26.070 |
| 8 | 0.1464 | 8.828  | 12.505 | 12.151 | 11.257 | 5.699  |
| 8 | 0.1474 | 10.705 | 6.699  | 6.035  | 35.934 | 20.531 |
| 8 | 0.1484 | 12.434 | 12.593 | 14.210 | 6.439  | 12.902 |
| 8 | 0.1494 | 19.116 | 21.331 | 28.120 | 14.797 | 10.111 |
| 8 | 0.1504 | 14.678 | 12.465 | 13.806 | 15.369 | 12.312 |
| 8 | 0.1514 | 14.561 | 13.234 | 18.967 | 18.873 | 26.835 |
| 8 | 0.1524 | 15.279 | 17.829 | 16.488 | 25.098 | 25.534 |
| 8 | 0.1534 | 10.583 | 8.585  | 8.132  | 22.182 | 20.261 |
| 8 | 0.1544 | 12.081 | 15.062 | 14.590 | 29.460 | 32.825 |
| 8 | 0.1554 | 12.519 | 15.159 | 11.475 | 15.552 | 5.830  |
| 8 | 0.1564 | 17.658 | 16.075 | 15.785 | 25.694 | 14.081 |
| 8 | 0.1574 | 18.448 | 14.479 | 15.992 | 24.961 | 12.658 |
| 8 | 0.1584 | 16.732 | 12.305 | 9.317  | 30.248 | 32.396 |
| 8 | 0.1594 | 16.041 | 14.480 | 14.843 | 12.829 | 25.434 |
| 8 | 0.1604 | 12.415 | 6.319  | 10.689 | 10.898 | 7.726  |
| 8 | 0.1614 | 11.259 | 11.707 | 12.576 | 23.182 | 18.079 |
| 8 | 0.1624 | 11.604 | 11.002 | 10.695 | 16.764 | 11.398 |
| 8 | 0.1634 | 9.981  | 22.090 | 15.822 | 19.869 | 13.949 |
| 8 | 0.1644 | 8.979  | 11.869 | 9.430  | 14.579 | 15.406 |
| 8 | 0.1654 | 16.473 | 14.266 | 12.332 | 12.844 | 17.020 |
| 8 | 0.1664 | 11.677 | 14.930 | 12.004 | 4.627  | 17.308 |
| 8 | 0.1674 | 4.880  | 6.080  | 5.318  | 9.236  | 10.690 |
| 8 | 0.1684 | 12.204 | 11.318 | 10.740 | 9.109  | 13.240 |
| 8 | 0.1694 | 11.659 | 12.827 | 12.420 | 13.943 | 23.906 |
| 8 | 0.1704 | 14.468 | 23.711 | 22.195 | 11.469 | 22.289 |
| 8 | 0.1714 | 21.597 | 23.533 | 27.300 | 15.439 | 20.069 |
| 8 | 0.1724 | 8.650  | 13.899 | 17.406 | 17.148 | 11.849 |
| 8 | 0.1734 | 15.797 | 4.919  | 17.066 | 6.389  | 9.218  |
| 8 | 0.1744 | 8.874  | 9.383  | 10.001 | 5.638  | 8.357  |
| 8 | 0.1754 | 30.604 | 22.086 | 22.363 | 15.688 | 17.682 |
| 8 | 0.1764 | 10.654 | 6.256  | 8.528  | 10.623 | 17.500 |
| 8 | 0.1774 | 12.534 | 11.427 | 11.625 | 8.137  | 15.207 |
| 8 | 0.1784 | 15.732 | 13.300 | 15.922 | 12.055 | 19.257 |
| 8 | 0.1794 | 11.901 | 5.119  | 7.049  | 12.747 | 14.770 |
| 8 | 0.1804 | 10.617 | 4.806  | 7.602  | 11.713 | 11.300 |
| 8 | 0.1814 | 10.041 | 14.320 | 10.255 | 12.466 | 15.496 |
| 8 | 0.1824 | 9.100  | 4.597  | 6.432  | 16.387 | 10.358 |
| 8 | 0.1834 | 13.422 | 12.638 | 19.327 | 21.841 | 17.457 |
| 8 | 0.1844 | 5.751  | 11.974 | 15.236 | 27.059 | 13.200 |
| 8 | 0.1854 | 17.046 | 11.624 | 23.848 | 20.463 | 13.650 |
| 8 | 0.1864 | 22.501 | 26.829 | 27.523 | 8.690  | 13.249 |
| 8 | 0.1874 | 20.174 | 25.248 | 23.895 | 13.786 | 20.812 |
| 8 | 0.1884 | 14.000 | 13.763 | 15.112 | 13.650 | 10.804 |
| 8 | 0.1894 | 18.252 | 16.059 | 22.966 | 14.928 | 9.753  |
| 8 | 0.1904 | 9.368  | 9.760  | 12.815 | 19.387 | 18.944 |
| 8 | 0.1914 | 16.648 | 11.755 | 12.169 | 8.191  | 10.784 |
| 8 | 0.1924 | 17.002 | 15.963 | 18.628 | 18.736 | 20.105 |
| 8 | 0.1934 | 14.870 | 8.856  | 9.962  | 24.781 | 20.089 |
| 8 | 0.1944 | 22.228 | 9.702  | 15.724 | 23.477 | 20.246 |

|   |        |        |        |        |        |        |
|---|--------|--------|--------|--------|--------|--------|
| 8 | 0.1954 | 13.248 | 10.640 | 13.361 | 15.600 | 15.832 |
| 8 | 0.1964 | 14.799 | 11.347 | 18.306 | 14.381 | 28.360 |
| 8 | 0.1974 | 27.376 | 13.598 | 24.702 | 10.473 | 8.417  |
| 8 | 0.1984 | 10.138 | 5.965  | 9.795  | 15.152 | 15.922 |
| 8 | 0.1994 | 10.380 | 13.937 | 14.350 | 17.748 | 20.313 |
| 8 | 0.2004 | 8.134  | 11.359 | 11.009 | 15.796 | 19.621 |
| 8 | 0.2014 | 31.170 | 20.764 | 21.298 | 7.964  | 23.364 |
| 8 | 0.2024 | 10.612 | 4.215  | 12.033 | 5.890  | 9.585  |
| 8 | 0.2034 | 9.771  | 8.573  | 13.622 | 7.867  | 15.244 |
| 8 | 0.2044 | 25.460 | 18.077 | 21.664 | 19.406 | 17.479 |
| 8 | 0.2054 | 12.318 | 14.666 | 13.155 | 12.506 | 10.791 |
| 8 | 0.2064 | 15.590 | 15.028 | 15.193 | 13.367 | 15.770 |
| 8 | 0.2074 | 12.210 | 10.427 | 14.936 | 10.663 | 17.209 |
| 8 | 0.2084 | 6.309  | 7.735  | 9.694  | 12.506 | 14.421 |
| 8 | 0.2094 | 12.327 | 9.035  | 12.937 | 10.657 | 5.486  |
| 8 | 0.2104 | 10.619 | 11.797 | 8.602  | 18.810 | 14.517 |
| 8 | 0.2114 | 14.453 | 14.608 | 13.118 | 16.150 | 10.627 |
| 8 | 0.2124 | 14.356 | 14.503 | 13.037 | 16.245 | 10.864 |
| 8 | 0.2134 | 14.261 | 14.390 | 12.945 | 16.341 | 11.101 |
| 8 | 0.2144 | 17.619 | 21.700 | 20.193 | 14.469 | 13.679 |
| 8 | 0.2154 | 5.052  | 6.459  | 9.613  | 9.442  | 12.235 |
| 8 | 0.2164 | 11.729 | 15.373 | 18.289 | 10.911 | 16.926 |
| 8 | 0.2174 | 12.414 | 15.770 | 16.003 | 14.313 | 5.101  |
| 8 | 0.2184 | 19.763 | 27.262 | 26.019 | 16.508 | 12.405 |
| 8 | 0.2194 | 16.138 | 18.502 | 14.154 | 24.650 | 17.508 |
| 8 | 0.2204 | 11.407 | 13.331 | 13.954 | 16.195 | 8.642  |
| 8 | 0.2214 | 16.844 | 12.071 | 19.091 | 20.386 | 16.108 |
| 8 | 0.2224 | 16.841 | 12.098 | 19.112 | 20.368 | 16.159 |
| 8 | 0.2234 | 8.433  | 9.885  | 12.405 | 21.939 | 8.136  |
| 8 | 0.2244 | 26.927 | 20.262 | 28.743 | 23.107 | 10.560 |
| 8 | 0.2254 | 11.566 | 19.293 | 12.615 | 21.776 | 23.798 |
| 8 | 0.2264 | 10.942 | 17.883 | 13.413 | 13.077 | 14.060 |
| 8 | 0.2274 | 12.971 | 22.377 | 28.345 | 12.807 | 14.452 |
| 8 | 0.2284 | 38.706 | 28.433 | 36.989 | 13.735 | 26.885 |
| 8 | 0.2294 | 11.541 | 10.048 | 9.094  | 17.596 | 26.585 |
| 8 | 0.2304 | 17.023 | 16.786 | 22.831 | 31.783 | 17.464 |
| 8 | 0.2314 | 19.267 | 30.738 | 31.161 | 27.508 | 24.041 |
| 8 | 0.2324 | 26.039 | 23.057 | 34.149 | 22.508 | 24.420 |
| 8 | 0.2334 | 24.408 | 19.292 | 26.896 | 18.897 | 23.608 |
| 8 | 0.2344 | 11.842 | 13.078 | 21.508 | 9.487  | 17.980 |
| 8 | 0.2354 | 10.058 | 20.079 | 15.469 | 23.190 | 21.575 |
| 8 | 0.2364 | 13.203 | 16.697 | 16.849 | 21.849 | 20.085 |
| 8 | 0.2374 | 19.281 | 15.968 | 23.585 | 19.570 | 18.943 |
| 8 | 0.2384 | 19.473 | 17.631 | 23.653 | 9.017  | 20.608 |
| 8 | 0.2394 | 27.912 | 28.343 | 31.249 | 13.745 | 13.840 |
| 8 | 0.2404 | 14.503 | 10.088 | 12.300 | 12.420 | 22.380 |
| 8 | 0.2414 | 34.093 | 21.162 | 27.025 | 34.543 | 34.805 |
| 8 | 0.2424 | 10.519 | 21.603 | 16.557 | 27.205 | 19.184 |
| 8 | 0.2434 | 11.172 | 12.003 | 16.751 | 25.956 | 15.658 |
| 8 | 0.2444 | 16.631 | 21.660 | 17.293 | 19.913 | 16.263 |

|   |        |        |        |        |        |        |
|---|--------|--------|--------|--------|--------|--------|
| 8 | 0.2454 | 13.935 | 16.683 | 18.962 | 11.897 | 18.350 |
| 8 | 0.2464 | 7.010  | 6.228  | 9.122  | 14.308 | 13.679 |
| 8 | 0.2474 | 10.192 | 7.541  | 11.823 | 16.204 | 16.991 |
| 8 | 0.2484 | 10.102 | 10.448 | 11.902 | 8.660  | 14.494 |
| 8 | 0.2494 | 19.655 | 21.110 | 31.831 | 16.934 | 24.705 |
| 8 | 0.2504 | 20.916 | 14.143 | 16.693 | 19.434 | 14.161 |
| 8 | 0.2514 | 17.274 | 20.268 | 20.539 | 12.413 | 10.609 |
| 8 | 0.2524 | 15.580 | 12.638 | 13.443 | 24.756 | 24.168 |
| 8 | 0.2534 | 27.332 | 29.823 | 28.938 | 34.962 | 15.605 |
| 8 | 0.2544 | 17.201 | 23.672 | 26.536 | 17.627 | 15.071 |
| 8 | 0.2554 | 12.092 | 17.663 | 17.834 | 19.037 | 13.976 |
| 8 | 0.2564 | 7.917  | 11.286 | 11.976 | 15.049 | 7.516  |
| 8 | 0.2574 | 11.620 | 17.268 | 18.780 | 15.445 | 8.136  |
| 8 | 0.2584 | 16.711 | 24.176 | 23.914 | 12.608 | 11.647 |
| 8 | 0.2594 | 16.835 | 17.806 | 23.939 | 20.901 | 28.426 |
| 8 | 0.2604 | 21.394 | 21.656 | 22.524 | 26.793 | 27.104 |
| 8 | 0.2614 | 13.829 | 13.343 | 18.393 | 18.975 | 25.821 |
| 8 | 0.2624 | 20.839 | 21.061 | 23.775 | 12.805 | 9.702  |
| 8 | 0.2634 | 36.543 | 34.339 | 37.510 | 14.753 | 20.993 |
| 8 | 0.2644 | 2.935  | 7.398  | 2.458  | 16.578 | 7.110  |
| 8 | 0.2654 | 24.766 | 26.657 | 26.762 | 23.349 | 14.068 |
| 8 | 0.2664 | 10.056 | 12.369 | 9.535  | 16.384 | 11.207 |
| 8 | 0.2674 | 26.892 | 16.933 | 21.340 | 13.992 | 12.454 |
| 8 | 0.2684 | 12.807 | 15.140 | 13.084 | 18.102 | 14.299 |
| 8 | 0.2694 | 25.094 | 20.977 | 21.145 | 25.293 | 16.282 |
| 8 | 0.2704 | 18.044 | 16.543 | 16.155 | 12.146 | 17.769 |
| 8 | 0.2714 | 21.111 | 19.937 | 19.618 | 15.194 | 14.648 |
| 8 | 0.2724 | 16.956 | 10.351 | 15.140 | 17.952 | 14.811 |
| 8 | 0.2734 | 17.324 | 11.741 | 17.608 | 15.451 | 18.569 |
| 8 | 0.2744 | 15.063 | 15.280 | 16.658 | 16.461 | 26.473 |
| 8 | 0.2754 | 12.081 | 7.844  | 10.772 | 11.268 | 6.932  |
| 8 | 0.2764 | 12.408 | 10.180 | 11.749 | 13.425 | 16.616 |
| 8 | 0.2774 | 17.849 | 7.495  | 14.754 | 13.356 | 20.856 |
| 8 | 0.2784 | 15.869 | 14.329 | 20.093 | 19.497 | 13.375 |
| 8 | 0.2794 | 6.123  | 5.639  | 6.052  | 5.103  | 4.945  |
| 8 | 0.2804 | 15.012 | 7.652  | 11.358 | 14.610 | 6.501  |
| 8 | 0.2814 | 19.510 | 10.874 | 16.876 | 8.464  | 16.522 |
| 8 | 0.2824 | 19.330 | 10.076 | 16.351 | 15.024 | 18.964 |
| 8 | 0.2834 | 8.657  | 6.994  | 8.633  | 12.889 | 16.646 |
| 8 | 0.2844 | 12.261 | 13.425 | 9.270  | 15.368 | 19.554 |
| 8 | 0.2854 | 16.999 | 13.790 | 15.049 | 16.037 | 12.835 |
| 8 | 0.2864 | 7.902  | 7.205  | 10.534 | 21.878 | 14.281 |
| 8 | 0.2874 | 20.040 | 14.062 | 13.798 | 21.469 | 17.793 |
| 8 | 0.2884 | 33.281 | 25.166 | 32.036 | 20.878 | 26.050 |
| 8 | 0.2894 | 28.491 | 17.759 | 26.048 | 13.435 | 22.376 |
| 8 | 0.2904 | 12.578 | 10.709 | 15.854 | 13.012 | 11.117 |
| 8 | 0.2914 | 12.629 | 21.557 | 22.056 | 20.833 | 13.193 |
| 8 | 0.2924 | 10.062 | 11.445 | 12.498 | 23.623 | 16.848 |
| 8 | 0.2934 | 17.808 | 17.787 | 18.397 | 24.043 | 16.987 |
| 8 | 0.2944 | 10.465 | 11.344 | 12.096 | 18.120 | 9.597  |

|   |        |        |        |        |        |        |
|---|--------|--------|--------|--------|--------|--------|
| 8 | 0.2954 | 32.542 | 22.694 | 30.701 | 31.301 | 19.024 |
| 8 | 0.2964 | 20.178 | 18.760 | 18.162 | 16.623 | 8.074  |
| 8 | 0.2974 | 15.949 | 17.214 | 17.963 | 18.601 | 9.583  |
| 8 | 0.2984 | 11.295 | 12.607 | 13.728 | 13.468 | 9.457  |
| 8 | 0.2994 | 15.915 | 17.819 | 15.477 | 25.274 | 30.326 |
| 8 | 0.3004 | 14.234 | 15.914 | 9.530  | 24.930 | 20.683 |
| 8 | 0.3014 | 23.696 | 20.859 | 14.255 | 21.499 | 21.403 |
| 8 | 0.3024 | 6.647  | 10.907 | 5.434  | 12.404 | 14.742 |
| 8 | 0.3034 | 6.715  | 9.866  | 9.314  | 12.852 | 9.330  |
| 8 | 0.3044 | 19.570 | 15.658 | 15.891 | 16.938 | 14.070 |
| 8 | 0.3054 | 19.478 | 10.632 | 18.730 | 20.154 | 18.225 |
| 8 | 0.3064 | 22.485 | 14.454 | 19.310 | 26.400 | 22.025 |
| 8 | 0.3074 | 9.321  | 13.689 | 9.748  | 25.310 | 11.733 |
| 8 | 0.3084 | 7.198  | 14.123 | 7.782  | 21.134 | 14.987 |
| 8 | 0.3094 | 9.138  | 8.715  | 9.821  | 8.545  | 10.496 |
| 8 | 0.3104 | 13.934 | 8.623  | 14.974 | 10.869 | 8.370  |
| 8 | 0.3114 | 15.850 | 13.611 | 22.716 | 15.807 | 13.087 |
| 8 | 0.3124 | 10.118 | 9.586  | 17.398 | 16.534 | 6.394  |
| 8 | 0.3134 | 12.512 | 8.935  | 12.264 | 9.293  | 2.893  |
| 8 | 0.3144 | 12.711 | 9.095  | 8.442  | 4.381  | 6.153  |
| 8 | 0.3154 | 21.741 | 16.392 | 11.299 | 19.769 | 22.731 |
| 8 | 0.3164 | 25.554 | 19.858 | 19.822 | 22.025 | 18.725 |
| 8 | 0.3174 | 26.429 | 25.988 | 23.627 | 26.852 | 21.043 |
| 8 | 0.3184 | 26.426 | 25.985 | 23.624 | 26.852 | 21.041 |
| 8 | 0.3194 | 24.201 | 13.903 | 20.680 | 21.194 | 16.648 |
| 8 | 0.3204 | 14.043 | 11.687 | 15.859 | 16.239 | 20.635 |
| 8 | 0.3214 | 10.547 | 9.977  | 13.305 | 22.145 | 20.467 |
| 8 | 0.3224 | 6.571  | 13.002 | 14.708 | 18.813 | 12.156 |
| 8 | 0.3234 | 10.869 | 6.004  | 5.408  | 20.514 | 20.707 |
| 8 | 0.3244 | 12.805 | 4.823  | 8.371  | 20.068 | 23.321 |
| 8 | 0.3254 | 17.040 | 8.766  | 13.684 | 19.892 | 20.613 |
| 8 | 0.3264 | 18.476 | 14.979 | 21.485 | 14.860 | 21.486 |
| 8 | 0.3274 | 16.871 | 10.044 | 12.761 | 17.538 | 25.572 |
| 8 | 0.3284 | 9.777  | 5.396  | 12.622 | 13.766 | 10.428 |
| 8 | 0.3294 | 17.670 | 23.772 | 15.406 | 24.991 | 21.879 |
| 8 | 0.3304 | 14.244 | 8.986  | 10.597 | 18.772 | 19.069 |
| 8 | 0.3314 | 17.840 | 12.955 | 13.456 | 14.881 | 17.926 |
| 8 | 0.3324 | 16.851 | 11.504 | 9.051  | 21.183 | 16.013 |
| 8 | 0.3334 | 41.758 | 15.458 | 28.902 | 34.103 | 31.371 |
| 8 | 0.3344 | 10.586 | 17.163 | 15.395 | 29.326 | 17.406 |
| 8 | 0.3354 | 11.281 | 8.722  | 12.103 | 9.179  | 14.811 |
| 8 | 0.3364 | 9.865  | 9.596  | 13.462 | 24.811 | 24.510 |
| 8 | 0.3374 | 10.147 | 11.811 | 11.372 | 22.521 | 16.962 |
| 8 | 0.3384 | 17.536 | 21.288 | 18.232 | 27.637 | 36.549 |
| 8 | 0.3394 | 11.351 | 10.844 | 11.464 | 14.412 | 39.411 |
| 8 | 0.3404 | 18.442 | 17.033 | 18.734 | 24.094 | 42.988 |
| 8 | 0.3414 | 18.414 | 17.083 | 18.712 | 24.188 | 42.992 |
| 8 | 0.3424 | 21.115 | 26.293 | 20.829 | 14.637 | 24.335 |
| 8 | 0.3434 | 12.315 | 17.490 | 14.710 | 18.652 | 15.407 |
| 8 | 0.3444 | 21.826 | 14.803 | 15.715 | 18.686 | 15.883 |



|   |        |        |        |        |        |        |
|---|--------|--------|--------|--------|--------|--------|
| 8 | 0.3454 | 13.397 | 7.896  | 14.955 | 9.843  | 8.669  |
| 8 | 0.3464 | 13.812 | 13.771 | 18.243 | 19.666 | 14.209 |
| 8 | 0.3474 | 16.780 | 15.230 | 17.492 | 15.299 | 17.816 |
| 8 | 0.3484 | 16.774 | 15.218 | 17.488 | 15.274 | 17.819 |
| 8 | 0.3494 | 17.911 | 11.026 | 17.015 | 17.002 | 19.050 |
| 8 | 0.3504 | 12.774 | 7.600  | 13.468 | 14.769 | 21.025 |
| 8 | 0.3514 | 22.982 | 19.265 | 19.463 | 19.684 | 9.587  |
| 8 | 0.3524 | 18.101 | 16.773 | 17.345 | 16.087 | 21.791 |
| 8 | 0.3534 | 25.785 | 23.689 | 22.605 | 14.204 | 18.383 |
| 8 | 0.3544 | 5.110  | 7.499  | 7.491  | 18.316 | 11.343 |
| 8 | 0.3554 | 25.188 | 19.436 | 21.273 | 22.147 | 21.228 |
| 8 | 0.3564 | 23.799 | 18.468 | 19.562 | 22.815 | 29.674 |
| 8 | 0.3574 | 14.911 | 18.901 | 19.372 | 16.039 | 29.850 |
| 8 | 0.3584 | 16.264 | 8.188  | 9.924  | 18.505 | 24.957 |
| 8 | 0.3594 | 31.663 | 29.452 | 27.630 | 26.878 | 30.566 |
| 8 | 0.3604 | 18.093 | 13.992 | 17.333 | 13.528 | 26.242 |
| 8 | 0.3614 | 9.158  | 8.432  | 11.085 | 20.557 | 13.415 |
| 8 | 0.3624 | 5.894  | 11.954 | 6.634  | 17.551 | 13.339 |
| 8 | 0.3634 | 8.083  | 12.663 | 10.668 | 15.277 | 13.318 |
| 8 | 0.3644 | 10.741 | 10.144 | 7.222  | 15.903 | 15.659 |
| 8 | 0.3654 | 11.411 | 19.103 | 14.296 | 13.514 | 5.434  |
| 8 | 0.3664 | 8.654  | 14.115 | 9.670  | 16.527 | 3.700  |
| 8 | 0.3674 | 14.519 | 17.870 | 16.942 | 15.806 | 6.725  |
| 8 | 0.3684 | 7.438  | 12.839 | 10.232 | 20.938 | 8.535  |
| 8 | 0.3694 | 20.778 | 21.717 | 23.262 | 15.470 | 9.236  |
| 8 | 0.3704 | 21.698 | 22.794 | 21.443 | 17.486 | 18.722 |
| 8 | 0.3714 | 8.460  | 9.913  | 10.555 | 15.760 | 10.580 |
| 8 | 0.3724 | 7.701  | 10.583 | 5.726  | 21.062 | 10.394 |
| 8 | 0.3734 | 7.527  | 10.365 | 7.542  | 12.738 | 4.519  |
| 8 | 0.3744 | 9.936  | 9.001  | 10.230 | 5.237  | 5.547  |
| 8 | 0.3754 | 11.500 | 12.902 | 9.186  | 2.978  | 10.675 |
| 8 | 0.3764 | 13.124 | 17.566 | 10.292 | 18.023 | 17.235 |
| 8 | 0.3774 | 5.456  | 8.780  | 7.275  | 19.815 | 10.993 |
| 8 | 0.3784 | 14.006 | 9.712  | 8.858  | 32.695 | 22.927 |
| 8 | 0.3794 | 7.126  | 11.069 | 6.260  | 9.634  | 10.566 |
| 8 | 0.3804 | 7.039  | 10.305 | 8.994  | 10.799 | 8.190  |
| 8 | 0.3814 | 7.587  | 13.555 | 14.793 | 10.294 | 14.885 |
| 8 | 0.3824 | 10.003 | 7.642  | 16.207 | 21.032 | 14.702 |
| 8 | 0.3834 | 18.845 | 12.931 | 13.811 | 16.755 | 13.825 |
| 8 | 0.3844 | 20.855 | 15.852 | 20.314 | 19.785 | 15.528 |
| 8 | 0.3854 | 21.425 | 9.483  | 18.631 | 17.972 | 19.671 |
| 8 | 0.3864 | 12.621 | 7.492  | 13.826 | 14.707 | 21.761 |
| 8 | 0.3874 | 13.988 | 3.673  | 10.187 | 8.735  | 10.941 |
| 8 | 0.3884 | 20.525 | 17.309 | 19.907 | 16.817 | 35.325 |
| 8 | 0.3894 | 15.011 | 14.878 | 12.936 | 27.861 | 31.677 |
| 8 | 0.3904 | 11.966 | 8.755  | 9.638  | 22.715 | 23.270 |
| 8 | 0.3914 | 11.996 | 12.810 | 15.387 | 17.698 | 13.568 |
| 8 | 0.3924 | 19.108 | 17.818 | 14.407 | 16.066 | 15.833 |
| 8 | 0.3934 | 22.594 | 18.866 | 20.928 | 13.608 | 14.211 |
| 8 | 0.3944 | 12.692 | 11.785 | 14.481 | 40.659 | 31.213 |

|   |        |        |        |        |        |        |
|---|--------|--------|--------|--------|--------|--------|
| 8 | 0.3954 | 22.362 | 12.507 | 15.546 | 24.203 | 28.749 |
| 8 | 0.3964 | 13.357 | 9.084  | 9.171  | 26.609 | 25.366 |
| 8 | 0.3974 | 23.050 | 16.409 | 16.245 | 33.394 | 24.590 |
| 8 | 0.3984 | 13.704 | 7.180  | 7.961  | 20.525 | 18.950 |
| 8 | 0.3994 | 13.526 | 13.689 | 11.112 | 17.286 | 9.209  |
| 8 | 0.4004 | 13.864 | 15.942 | 8.969  | 32.208 | 24.085 |
| 8 | 0.4014 | 9.621  | 6.343  | 3.462  | 31.155 | 22.746 |
| 8 | 0.4024 | 6.987  | 4.481  | 1.800  | 30.915 | 13.487 |
| 8 | 0.4034 | 25.055 | 13.369 | 18.100 | 24.078 | 22.246 |
| 8 | 0.4044 | 18.009 | 10.899 | 16.223 | 16.174 | 17.375 |
| 8 | 0.4054 | 11.351 | 9.475  | 12.914 | 14.556 | 18.302 |
| 8 | 0.4064 | 15.193 | 9.223  | 16.927 | 16.955 | 13.822 |
| 8 | 0.4074 | 26.492 | 20.823 | 19.188 | 30.566 | 29.931 |
| 8 | 0.4084 | 17.351 | 13.362 | 11.999 | 26.995 | 23.719 |
| 8 | 0.4094 | 16.368 | 9.118  | 11.240 | 21.528 | 16.618 |
| 8 | 0.4104 | 19.260 | 10.440 | 12.373 | 14.595 | 11.576 |
| 8 | 0.4114 | 11.873 | 10.955 | 9.629  | 20.008 | 14.151 |
| 8 | 0.4124 | 13.291 | 9.385  | 10.364 | 23.033 | 29.435 |
| 8 | 0.4134 | 9.686  | 10.984 | 10.918 | 17.721 | 8.829  |
| 8 | 0.4144 | 10.333 | 11.075 | 8.807  | 21.933 | 23.221 |
| 8 | 0.4154 | 9.155  | 13.160 | 7.900  | 27.182 | 18.960 |
| 8 | 0.4164 | 21.054 | 14.967 | 16.663 | 13.053 | 24.200 |
| 8 | 0.4174 | 13.163 | 13.868 | 15.178 | 3.543  | 12.540 |
| 8 | 0.4184 | 7.212  | 7.388  | 7.117  | 14.876 | 4.689  |
| 8 | 0.4194 | 6.557  | 6.606  | 6.811  | 15.662 | 9.017  |
| 8 | 0.4204 | 21.166 | 13.073 | 15.085 | 11.200 | 10.811 |
| 8 | 0.4214 | 25.722 | 23.075 | 17.094 | 21.075 | 14.275 |
| 8 | 0.4224 | 14.426 | 14.323 | 9.489  | 14.158 | 11.723 |
| 8 | 0.4234 | 13.565 | 12.902 | 10.522 | 15.606 | 13.788 |
| 8 | 0.4244 | 11.402 | 11.263 | 10.818 | 17.661 | 9.183  |
| 8 | 0.4254 | 14.567 | 19.800 | 16.963 | 24.198 | 22.497 |
| 8 | 0.4264 | 6.980  | 14.176 | 13.387 | 28.288 | 17.217 |
| 8 | 0.4274 | 21.358 | 18.390 | 16.346 | 23.403 | 19.384 |
| 8 | 0.4284 | 18.979 | 12.110 | 10.695 | 24.524 | 18.773 |
| 8 | 0.4294 | 10.484 | 15.483 | 9.322  | 22.498 | 11.753 |
| 8 | 0.4304 | 23.388 | 22.689 | 19.165 | 23.238 | 12.511 |
| 8 | 0.4314 | 6.479  | 4.752  | 2.753  | 13.928 | 8.578  |
| 8 | 0.4324 | 15.307 | 22.137 | 16.059 | 20.314 | 14.699 |
| 8 | 0.4334 | 12.969 | 15.762 | 13.333 | 26.269 | 24.632 |
| 8 | 0.4344 | 14.700 | 15.756 | 15.655 | 29.541 | 19.221 |
| 8 | 0.4354 | 24.494 | 22.294 | 24.090 | 23.623 | 14.382 |
| 8 | 0.4364 | 7.735  | 16.001 | 8.087  | 22.317 | 12.627 |
| 8 | 0.4374 | 17.597 | 17.985 | 17.880 | 31.343 | 16.436 |
| 8 | 0.4384 | 21.244 | 22.139 | 22.544 | 32.022 | 15.878 |
| 8 | 0.4394 | 18.435 | 19.293 | 17.111 | 17.682 | 9.167  |
| 8 | 0.4404 | 20.539 | 18.674 | 22.655 | 7.707  | 17.652 |
| 8 | 0.4414 | 25.859 | 34.192 | 26.217 | 19.537 | 9.217  |
| 8 | 0.4424 | 18.540 | 23.132 | 18.544 | 21.704 | 24.575 |
| 8 | 0.4434 | 38.250 | 35.653 | 40.780 | 23.726 | 18.287 |
| 8 | 0.4444 | 30.015 | 16.638 | 25.691 | 21.678 | 22.391 |

|   |        |        |        |        |        |        |
|---|--------|--------|--------|--------|--------|--------|
| 8 | 0.4454 | 14.264 | 16.835 | 15.118 | 18.791 | 14.174 |
| 8 | 0.4464 | 12.213 | 15.707 | 10.209 | 12.546 | 20.272 |
| 8 | 0.4474 | 11.019 | 15.744 | 9.610  | 24.088 | 28.643 |
| 8 | 0.4484 | 10.936 | 15.222 | 11.228 | 9.540  | 13.705 |
| 8 | 0.4494 | 11.922 | 17.078 | 13.093 | 19.918 | 21.756 |
| 8 | 0.4504 | 16.270 | 8.844  | 14.264 | 23.725 | 24.606 |
| 8 | 0.4514 | 19.395 | 12.481 | 16.430 | 20.370 | 23.312 |
| 8 | 0.4524 | 21.977 | 20.234 | 20.628 | 20.194 | 16.782 |
| 8 | 0.4534 | 25.044 | 25.979 | 21.690 | 16.793 | 15.016 |
| 8 | 0.4544 | 15.131 | 18.165 | 12.898 | 10.653 | 16.474 |
| 8 | 0.4554 | 12.896 | 9.946  | 13.984 | 4.341  | 18.760 |
| 8 | 0.4564 | 10.178 | 8.290  | 12.256 | 9.814  | 5.532  |
| 8 | 0.4574 | 23.085 | 14.821 | 17.792 | 9.159  | 10.320 |
| 8 | 0.4584 | 21.153 | 14.506 | 16.583 | 15.082 | 8.826  |
| 8 | 0.4594 | 19.782 | 16.307 | 12.613 | 17.618 | 19.292 |
| 8 | 0.4604 | 25.082 | 15.520 | 17.932 | 11.136 | 16.560 |
| 8 | 0.4614 | 21.944 | 18.913 | 23.718 | 10.884 | 8.917  |
| 8 | 0.4624 | 16.546 | 15.630 | 15.734 | 7.560  | 7.519  |
| 8 | 0.4634 | 18.859 | 10.753 | 14.654 | 10.437 | 11.087 |
| 8 | 0.4644 | 19.952 | 19.073 | 18.453 | 14.908 | 20.517 |
| 8 | 0.4654 | 29.848 | 25.590 | 23.903 | 17.587 | 19.505 |
| 8 | 0.4664 | 39.571 | 32.329 | 31.186 | 18.421 | 24.468 |
| 8 | 0.4674 | 15.913 | 13.912 | 13.679 | 3.334  | 3.442  |
| 8 | 0.4684 | 10.573 | 12.000 | 12.204 | 3.306  | 3.705  |
| 8 | 0.4694 | 25.819 | 25.399 | 25.005 | 7.750  | 13.184 |
| 8 | 0.4704 | 13.472 | 6.623  | 9.699  | 7.405  | 4.448  |
| 8 | 0.4714 | 24.443 | 15.245 | 18.800 | 8.096  | 7.913  |
| 8 | 0.4724 | 28.074 | 14.308 | 18.768 | 10.728 | 11.985 |
| 8 | 0.4734 | 16.327 | 20.632 | 19.629 | 16.498 | 10.312 |
| 8 | 0.4744 | 16.718 | 14.174 | 19.417 | 8.415  | 8.148  |
| 8 | 0.4754 | 14.178 | 15.025 | 17.096 | 8.855  | 4.282  |
| 8 | 0.4764 | 29.849 | 19.795 | 24.292 | 16.473 | 15.228 |
| 8 | 0.4774 | 29.821 | 19.799 | 24.246 | 16.463 | 15.168 |
| 8 | 0.4784 | 15.022 | 11.489 | 14.492 | 12.157 | 18.457 |
| 8 | 0.4794 | 10.668 | 9.408  | 14.096 | 9.988  | 15.290 |
| 8 | 0.4804 | 10.456 | 6.377  | 9.227  | 9.945  | 7.553  |
| 8 | 0.4814 | 13.600 | 9.864  | 8.349  | 8.171  | 6.931  |
| 8 | 0.4824 | 33.862 | 21.518 | 22.920 | 10.943 | 9.039  |
| 8 | 0.4834 | 27.843 | 16.077 | 18.793 | 15.816 | 13.809 |
| 8 | 0.4844 | 15.756 | 11.350 | 10.901 | 14.100 | 13.764 |
| 8 | 0.4854 | 18.902 | 17.194 | 16.308 | 20.024 | 10.950 |
| 8 | 0.4864 | 19.371 | 7.184  | 10.108 | 17.444 | 17.132 |
| 8 | 0.4874 | 15.612 | 9.424  | 10.870 | 6.038  | 8.678  |
| 8 | 0.4884 | 18.858 | 15.027 | 17.801 | 8.196  | 8.315  |
| 8 | 0.4894 | 32.840 | 13.968 | 18.359 | 13.074 | 20.804 |
| 8 | 0.4904 | 30.123 | 13.941 | 21.849 | 13.458 | 17.825 |
| 8 | 0.4914 | 44.373 | 23.794 | 25.180 | 18.042 | 22.447 |
| 8 | 0.4924 | 29.266 | 25.920 | 27.502 | 13.277 | 15.033 |
| 8 | 0.4934 | 19.742 | 12.036 | 13.575 | 9.840  | 10.915 |
| 8 | 0.4944 | 18.667 | 13.726 | 12.391 | 10.418 | 19.069 |

|   |        |        |        |        |        |        |
|---|--------|--------|--------|--------|--------|--------|
| 8 | 0.4954 | 10.932 | 10.251 | 11.246 | 11.412 | 7.262  |
| 8 | 0.4964 | 18.232 | 14.099 | 18.275 | 7.929  | 5.713  |
| 8 | 0.4974 | 36.948 | 19.127 | 23.573 | 22.847 | 16.767 |
| 8 | 0.4984 | 21.564 | 14.165 | 14.879 | 21.062 | 20.378 |
| 8 | 0.4994 | 11.662 | 10.158 | 7.703  | 13.783 | 13.554 |
| 8 | 0.5004 | 14.951 | 7.770  | 10.888 | 8.575  | 13.849 |
| 8 | 0.5014 | 12.524 | 7.673  | 12.029 | 12.571 | 11.171 |
| 8 | 0.5024 | 36.267 | 17.836 | 22.053 | 17.290 | 15.563 |
| 8 | 0.5034 | 27.036 | 21.627 | 20.747 | 8.722  | 10.901 |
| 8 | 0.5044 | 11.114 | 8.883  | 8.438  | 7.294  | 6.437  |
| 8 | 0.5054 | 16.878 | 13.870 | 20.073 | 12.254 | 4.552  |
| 8 | 0.5064 | 34.972 | 22.659 | 30.682 | 11.395 | 8.932  |
| 8 | 0.5074 | 25.547 | 14.073 | 19.828 | 17.105 | 14.096 |
| 8 | 0.5084 | 11.348 | 8.278  | 8.694  | 16.580 | 21.045 |
| 8 | 0.5094 | 23.581 | 20.249 | 20.988 | 16.359 | 10.025 |
| 8 | 0.5104 | 15.477 | 12.999 | 10.097 | 5.986  | 8.324  |
| 8 | 0.5114 | 13.345 | 12.763 | 7.726  | 7.316  | 8.628  |
| 8 | 0.5124 | 20.919 | 16.913 | 13.160 | 13.802 | 18.864 |
| 8 | 0.5134 | 16.510 | 11.983 | 16.307 | 9.922  | 17.129 |
| 8 | 0.5144 | 33.732 | 18.732 | 19.046 | 12.284 | 22.552 |
| 8 | 0.5154 | 21.521 | 22.664 | 18.292 | 6.861  | 10.606 |
| 8 | 0.5164 | 31.435 | 20.592 | 24.640 | 9.233  | 13.851 |
| 8 | 0.5174 | 19.866 | 11.110 | 16.524 | 7.239  | 18.496 |
| 8 | 0.5184 | 9.235  | 13.235 | 9.930  | 20.372 | 23.126 |
| 8 | 0.5194 | 9.190  | 13.265 | 9.900  | 20.457 | 23.088 |
| 8 | 0.5204 | 7.221  | 12.047 | 11.441 | 18.600 | 13.535 |
| 8 | 0.5214 | 7.207  | 12.043 | 11.431 | 18.605 | 13.526 |
| 8 | 0.5224 | 13.611 | 5.559  | 15.339 | 27.741 | 21.470 |
| 8 | 0.5234 | 2.754  | 6.511  | 3.363  | 10.928 | 9.984  |
| 8 | 0.5244 | 11.122 | 13.792 | 11.826 | 10.324 | 10.651 |
| 8 | 0.5254 | 11.093 | 13.770 | 11.855 | 10.352 | 10.759 |
| 8 | 0.5264 | 26.737 | 16.446 | 24.752 | 16.029 | 14.111 |
| 8 | 0.5274 | 17.252 | 10.402 | 13.035 | 30.660 | 14.267 |
| 8 | 0.5284 | 13.778 | 12.921 | 13.809 | 14.084 | 12.947 |
| 8 | 0.5294 | 21.089 | 9.415  | 20.773 | 14.330 | 23.628 |
| 8 | 0.5304 | 13.424 | 6.180  | 8.706  | 15.127 | 15.189 |
| 8 | 0.5314 | 20.061 | 8.804  | 14.096 | 10.699 | 11.479 |
| 8 | 0.5324 | 18.669 | 10.353 | 15.565 | 12.416 | 17.201 |
| 8 | 0.5334 | 13.620 | 7.777  | 16.490 | 15.618 | 9.338  |
| 8 | 0.5344 | 8.041  | 4.188  | 8.896  | 13.353 | 8.687  |
| 8 | 0.5354 | 12.847 | 13.502 | 7.536  | 23.403 | 14.482 |
| 8 | 0.5364 | 9.677  | 5.762  | 9.210  | 7.608  | 4.793  |
| 8 | 0.5374 | 26.154 | 22.933 | 28.576 | 18.810 | 13.587 |
| 8 | 0.5384 | 29.568 | 18.110 | 26.665 | 19.596 | 22.208 |
| 8 | 0.5394 | 26.202 | 16.908 | 25.707 | 23.787 | 21.281 |
| 8 | 0.5404 | 23.752 | 15.918 | 23.884 | 13.971 | 8.819  |
| 8 | 0.5414 | 12.199 | 9.045  | 10.414 | 25.037 | 19.299 |
| 8 | 0.5424 | 9.834  | 13.269 | 13.150 | 12.932 | 4.953  |
| 8 | 0.5434 | 29.241 | 22.933 | 29.769 | 12.725 | 20.957 |
| 8 | 0.5444 | 23.931 | 20.619 | 24.203 | 20.713 | 23.095 |

|   |        |        |        |        |        |        |
|---|--------|--------|--------|--------|--------|--------|
| 8 | 0.5454 | 11.232 | 8.501  | 14.912 | 5.777  | 16.078 |
| 8 | 0.5464 | 19.837 | 16.446 | 15.005 | 13.763 | 17.910 |
| 8 | 0.5474 | 25.338 | 16.871 | 19.059 | 12.245 | 23.265 |
| 8 | 0.5484 | 20.210 | 14.112 | 23.523 | 6.626  | 10.002 |
| 8 | 0.5494 | 17.138 | 8.796  | 15.490 | 10.287 | 14.931 |
| 8 | 0.5504 | 23.409 | 24.557 | 24.595 | 16.727 | 22.748 |
| 8 | 0.5514 | 15.952 | 11.462 | 13.723 | 8.411  | 13.748 |
| 8 | 0.5524 | 15.967 | 11.474 | 13.732 | 8.425  | 13.773 |
| 8 | 0.5534 | 20.562 | 12.963 | 21.072 | 8.150  | 16.449 |
| 8 | 0.5544 | 20.194 | 15.128 | 20.188 | 19.122 | 15.446 |
| 8 | 0.5554 | 22.810 | 15.079 | 25.150 | 10.879 | 15.834 |
| 8 | 0.5564 | 21.192 | 17.988 | 23.155 | 15.966 | 14.517 |
| 8 | 0.5574 | 20.373 | 15.322 | 24.597 | 10.044 | 8.336  |
| 8 | 0.5584 | 20.320 | 11.451 | 20.029 | 11.602 | 10.315 |
| 8 | 0.5594 | 30.179 | 22.132 | 26.457 | 11.350 | 12.798 |
| 8 | 0.5604 | 23.264 | 20.106 | 19.083 | 11.838 | 7.585  |
| 8 | 0.5614 | 13.661 | 11.880 | 8.821  | 14.326 | 11.043 |
| 8 | 0.5624 | 15.347 | 15.218 | 12.285 | 10.927 | 14.745 |
| 8 | 0.5634 | 12.427 | 10.169 | 12.170 | 10.893 | 15.872 |
| 8 | 0.5644 | 15.442 | 14.125 | 16.105 | 10.078 | 16.174 |
| 8 | 0.5654 | 14.595 | 12.292 | 11.044 | 9.485  | 21.658 |
| 8 | 0.5664 | 12.687 | 11.770 | 19.977 | 6.622  | 14.093 |
| 8 | 0.5674 | 12.282 | 12.971 | 11.322 | 8.167  | 14.247 |
| 8 | 0.5684 | 5.208  | 7.952  | 5.501  | 4.449  | 2.876  |
| 8 | 0.5694 | 27.891 | 19.853 | 19.910 | 8.432  | 11.328 |
| 8 | 0.5704 | 14.589 | 15.515 | 13.701 | 13.486 | 14.107 |
| 8 | 0.5714 | 15.715 | 10.486 | 13.346 | 11.419 | 11.825 |
| 8 | 0.5724 | 25.754 | 17.923 | 22.126 | 12.717 | 23.706 |
| 8 | 0.5734 | 20.758 | 9.889  | 13.617 | 8.162  | 16.967 |
| 8 | 0.5744 | 10.581 | 12.262 | 9.178  | 9.417  | 7.663  |
| 8 | 0.5754 | 5.615  | 8.937  | 8.457  | 11.744 | 8.604  |
| 8 | 0.5764 | 20.331 | 15.606 | 20.221 | 13.582 | 19.504 |
| 8 | 0.5774 | 32.712 | 22.066 | 20.869 | 10.668 | 14.106 |
| 8 | 0.5784 | 16.532 | 15.003 | 18.020 | 6.303  | 9.472  |
| 8 | 0.5794 | 15.701 | 8.453  | 10.787 | 8.573  | 15.806 |
| 8 | 0.5804 | 18.533 | 8.537  | 13.575 | 11.216 | 13.473 |
| 8 | 0.5814 | 11.900 | 8.708  | 12.997 | 7.186  | 10.427 |
| 8 | 0.5824 | 10.050 | 7.055  | 11.094 | 9.849  | 8.901  |
| 8 | 0.5834 | 18.686 | 19.103 | 16.268 | 5.654  | 8.081  |
| 8 | 0.5844 | 20.970 | 15.721 | 15.711 | 7.290  | 6.253  |
| 8 | 0.5854 | 13.015 | 11.739 | 12.654 | 6.244  | 8.952  |
| 8 | 0.5864 | 16.290 | 14.357 | 14.241 | 9.951  | 15.331 |
| 8 | 0.5874 | 7.097  | 11.830 | 10.664 | 6.952  | 5.694  |
| 8 | 0.5884 | 7.594  | 11.514 | 5.717  | 5.468  | 7.330  |
| 8 | 0.5894 | 2.250  | 4.920  | 2.499  | 5.453  | 3.442  |
| 8 | 0.5904 | 8.386  | 12.221 | 10.823 | 11.532 | 6.331  |
| 8 | 0.5914 | 14.242 | 16.978 | 14.138 | 19.990 | 12.956 |
| 8 | 0.5924 | 16.120 | 16.291 | 17.873 | 12.043 | 13.174 |
| 8 | 0.5934 | 17.971 | 13.928 | 10.774 | 12.379 | 15.880 |
| 8 | 0.5944 | 9.410  | 9.162  | 10.809 | 13.232 | 26.334 |

|   |        |        |        |        |        |        |
|---|--------|--------|--------|--------|--------|--------|
| 8 | 0.5954 | 30.361 | 19.535 | 24.358 | 8.440  | 11.945 |
| 8 | 0.5964 | 9.581  | 8.772  | 10.876 | 8.630  | 9.562  |
| 8 | 0.5974 | 6.237  | 7.484  | 5.787  | 4.699  | 10.319 |
| 8 | 0.5984 | 16.635 | 11.572 | 11.564 | 15.990 | 13.894 |
| 8 | 0.5994 | 23.856 | 24.866 | 16.964 | 18.082 | 16.596 |
| 8 | 0.6004 | 15.817 | 14.568 | 9.839  | 18.194 | 16.657 |
| 8 | 0.6014 | 15.888 | 13.695 | 10.862 | 12.991 | 10.402 |
| 8 | 0.6024 | 16.774 | 8.992  | 16.424 | 4.501  | 6.390  |
| 8 | 0.6034 | 3.983  | 8.507  | 6.984  | 12.017 | 18.890 |
| 8 | 0.6044 | 4.226  | 12.045 | 12.110 | 14.087 | 24.957 |
| 8 | 0.6054 | 14.370 | 14.772 | 11.719 | 12.012 | 8.562  |
| 8 | 0.6064 | 12.893 | 10.400 | 11.556 | 4.548  | 15.496 |
| 8 | 0.6074 | 16.456 | 13.394 | 13.674 | 8.140  | 12.498 |
| 8 | 0.6084 | 17.682 | 15.393 | 17.783 | 9.608  | 13.821 |
| 8 | 0.6094 | 10.628 | 19.406 | 14.875 | 6.143  | 4.586  |
| 8 | 0.6104 | 9.683  | 11.894 | 10.580 | 8.749  | 6.839  |
| 8 | 0.6114 | 10.009 | 6.946  | 7.277  | 15.460 | 9.428  |
| 8 | 0.6124 | 11.943 | 12.238 | 10.960 | 11.704 | 8.464  |
| 8 | 0.6134 | 18.171 | 9.064  | 10.915 | 16.220 | 14.883 |
| 8 | 0.6144 | 20.915 | 15.712 | 20.426 | 16.852 | 10.513 |
| 8 | 0.6154 | 10.198 | 12.831 | 10.388 | 13.269 | 10.279 |
| 8 | 0.6164 | 9.673  | 6.226  | 7.263  | 9.420  | 21.449 |
| 8 | 0.6174 | 3.310  | 4.966  | 1.389  | 6.161  | 12.484 |
| 8 | 0.6184 | 10.451 | 10.372 | 10.147 | 10.894 | 7.949  |
| 8 | 0.6194 | 18.276 | 14.795 | 14.589 | 19.663 | 10.795 |
| 8 | 0.6204 | 14.012 | 14.174 | 11.897 | 13.097 | 6.697  |
| 8 | 0.6214 | 14.085 | 12.500 | 14.080 | 6.655  | 13.565 |
| 8 | 0.6224 | 6.167  | 5.356  | 4.394  | 9.776  | 16.933 |
| 8 | 0.6234 | 20.573 | 15.970 | 14.965 | 9.088  | 13.594 |
| 8 | 0.6244 | 5.791  | 6.256  | 5.676  | 10.108 | 10.024 |
| 8 | 0.6254 | 4.637  | 3.652  | 4.146  | 4.923  | 8.487  |
| 8 | 0.6264 | 7.298  | 3.849  | 6.705  | 5.935  | 9.846  |
| 8 | 0.6274 | 11.180 | 13.958 | 9.063  | 8.601  | 9.294  |
| 8 | 0.6284 | 8.291  | 15.138 | 7.558  | 14.775 | 11.781 |
| 8 | 0.6294 | 18.833 | 18.312 | 16.687 | 8.734  | 3.976  |
| 8 | 0.6304 | 6.422  | 4.524  | 5.610  | 9.109  | 4.140  |
| 8 | 0.6314 | 9.178  | 9.906  | 10.061 | 8.038  | 4.242  |
| 8 | 0.6324 | 18.329 | 16.545 | 12.913 | 13.234 | 7.101  |
| 8 | 0.6334 | 3.355  | 9.319  | 6.103  | 12.830 | 14.947 |
| 8 | 0.6344 | 4.561  | 11.311 | 6.991  | 19.470 | 6.449  |
| 8 | 0.6354 | 6.221  | 9.328  | 8.337  | 8.990  | 6.236  |
| 8 | 0.6364 | 9.463  | 14.215 | 14.057 | 10.509 | 5.593  |
| 8 | 0.6374 | 9.462  | 14.207 | 14.054 | 10.502 | 5.604  |
| 8 | 0.6384 | 5.221  | 6.642  | 7.248  | 5.853  | 2.823  |
| 8 | 0.6394 | 7.982  | 8.620  | 9.629  | 9.183  | 7.998  |
| 8 | 0.6404 | 12.352 | 11.480 | 12.938 | 13.792 | 10.713 |
| 8 | 0.6414 | 12.637 | 11.615 | 13.102 | 13.606 | 10.727 |
| 8 | 0.6424 | 16.072 | 18.703 | 16.798 | 13.073 | 18.301 |
| 8 | 0.6434 | 5.316  | 5.029  | 5.813  | 4.004  | 14.907 |
| 8 | 0.6444 | 4.064  | 5.603  | 8.360  | 10.730 | 22.762 |

|   |        |        |        |        |        |        |
|---|--------|--------|--------|--------|--------|--------|
| 8 | 0.6454 | 12.968 | 14.216 | 16.193 | 12.428 | 29.724 |
| 8 | 0.6464 | 12.174 | 14.787 | 13.762 | 19.007 | 21.092 |
| 8 | 0.6474 | 9.131  | 10.999 | 6.968  | 9.331  | 18.403 |
| 8 | 0.6484 | 14.866 | 16.152 | 16.199 | 8.239  | 15.934 |
| 8 | 0.6494 | 9.659  | 15.156 | 15.009 | 8.872  | 11.613 |
| 8 | 0.6504 | 30.224 | 21.457 | 29.075 | 10.633 | 10.964 |
| 8 | 0.6514 | 26.817 | 18.874 | 23.011 | 11.686 | 17.657 |
| 8 | 0.6524 | 6.851  | 4.940  | 6.918  | 16.951 | 23.372 |
| 8 | 0.6534 | 16.894 | 9.965  | 13.903 | 10.895 | 26.567 |
| 8 | 0.6544 | 29.219 | 18.528 | 24.020 | 8.782  | 9.941  |
| 8 | 0.6554 | 32.716 | 20.081 | 24.238 | 9.052  | 10.555 |
| 8 | 0.6564 | 20.459 | 11.425 | 13.662 | 11.980 | 14.133 |
| 8 | 0.6574 | 40.692 | 29.147 | 33.906 | 13.113 | 7.380  |
| 8 | 0.6584 | 39.196 | 28.299 | 31.732 | 12.409 | 9.113  |
| 8 | 0.6594 | 23.216 | 16.659 | 22.752 | 11.195 | 11.218 |
| 8 | 0.6604 | 15.833 | 16.054 | 7.928  | 14.802 | 10.270 |
| 8 | 0.6614 | 19.152 | 22.382 | 15.072 | 18.532 | 15.527 |
| 8 | 0.6624 | 8.111  | 13.637 | 8.172  | 14.652 | 13.220 |
| 8 | 0.6634 | 15.697 | 20.232 | 14.187 | 12.816 | 16.671 |
| 8 | 0.6644 | 19.285 | 19.328 | 17.746 | 13.695 | 12.309 |
| 8 | 0.6654 | 15.042 | 16.493 | 13.189 | 19.675 | 16.827 |
| 8 | 0.6664 | 13.297 | 13.674 | 10.827 | 15.020 | 13.182 |
| 8 | 0.6674 | 24.971 | 12.574 | 14.133 | 16.317 | 12.861 |
| 8 | 0.6684 | 19.208 | 13.031 | 11.226 | 14.616 | 18.224 |
| 8 | 0.6694 | 19.975 | 19.021 | 16.525 | 14.606 | 12.512 |
| 8 | 0.6704 | 19.224 | 21.573 | 16.704 | 18.143 | 8.197  |
| 8 | 0.6714 | 18.955 | 13.983 | 10.214 | 23.691 | 17.887 |
| 8 | 0.6724 | 24.960 | 16.903 | 18.001 | 16.607 | 19.488 |
| 8 | 0.6734 | 23.544 | 18.001 | 15.966 | 20.354 | 16.156 |
| 8 | 0.6744 | 24.179 | 19.809 | 17.426 | 15.609 | 15.520 |
| 8 | 0.6754 | 19.423 | 15.162 | 17.924 | 11.001 | 9.366  |
| 8 | 0.6764 | 29.480 | 18.306 | 20.073 | 16.072 | 15.231 |
| 8 | 0.6774 | 33.920 | 13.309 | 16.511 | 13.537 | 17.935 |
| 8 | 0.6784 | 24.627 | 13.154 | 18.600 | 19.012 | 16.824 |
| 8 | 0.6794 | 24.511 | 13.157 | 18.538 | 18.905 | 16.797 |
| 8 | 0.6804 | 4.225  | 5.358  | 5.912  | 7.413  | 7.468  |
| 8 | 0.6814 | 15.753 | 8.789  | 16.028 | 5.752  | 2.409  |
| 8 | 0.6824 | 15.579 | 13.741 | 16.141 | 10.165 | 6.755  |
| 8 | 0.6834 | 9.629  | 2.553  | 6.973  | 12.799 | 11.855 |
| 8 | 0.6844 | 11.876 | 14.940 | 10.744 | 10.128 | 6.599  |
| 8 | 0.6854 | 14.822 | 4.939  | 5.712  | 17.535 | 13.487 |
| 8 | 0.6864 | 10.228 | 9.103  | 5.716  | 13.071 | 16.003 |
| 8 | 0.6874 | 13.952 | 12.611 | 14.770 | 12.873 | 4.503  |
| 8 | 0.6884 | 19.067 | 11.708 | 12.683 | 23.509 | 8.534  |
| 8 | 0.6894 | 14.205 | 11.390 | 10.326 | 22.880 | 10.252 |
| 8 | 0.6904 | 18.754 | 9.298  | 13.224 | 9.262  | 7.148  |
| 8 | 0.6914 | 23.137 | 18.610 | 21.345 | 11.514 | 7.626  |
| 8 | 0.6924 | 20.546 | 15.243 | 15.830 | 13.096 | 7.720  |
| 8 | 0.6934 | 24.182 | 16.979 | 15.718 | 29.015 | 18.364 |
| 8 | 0.6944 | 27.045 | 23.067 | 23.042 | 17.032 | 13.210 |

|   |        |        |        |        |        |        |
|---|--------|--------|--------|--------|--------|--------|
| 8 | 0.6954 | 23.995 | 17.312 | 20.632 | 21.995 | 10.641 |
| 8 | 0.6964 | 28.858 | 14.257 | 19.533 | 20.643 | 13.306 |
| 8 | 0.6974 | 23.774 | 10.481 | 14.331 | 19.022 | 15.540 |
| 8 | 0.6984 | 26.292 | 14.693 | 19.305 | 12.128 | 12.200 |
| 8 | 0.6994 | 22.829 | 10.837 | 18.186 | 6.359  | 8.349  |
| 8 | 0.7004 | 26.303 | 15.253 | 18.837 | 10.869 | 12.725 |
| 8 | 0.7014 | 11.207 | 5.011  | 9.677  | 9.423  | 3.928  |
| 8 | 0.7024 | 26.798 | 9.174  | 21.388 | 21.126 | 15.713 |
| 8 | 0.7034 | 22.462 | 9.005  | 18.710 | 19.884 | 13.155 |
| 8 | 0.7044 | 16.809 | 6.998  | 10.357 | 13.036 | 10.535 |
| 8 | 0.7054 | 22.311 | 14.935 | 15.765 | 21.663 | 21.717 |
| 8 | 0.7064 | 18.380 | 13.351 | 14.007 | 28.511 | 12.496 |
| 8 | 0.7074 | 19.351 | 16.126 | 15.663 | 21.904 | 20.540 |
| 8 | 0.7084 | 18.154 | 12.729 | 18.360 | 22.891 | 14.124 |
| 8 | 0.7094 | 16.208 | 5.328  | 8.843  | 19.065 | 10.326 |
| 8 | 0.7104 | 18.144 | 11.513 | 13.398 | 20.071 | 15.127 |
| 8 | 0.7114 | 17.974 | 11.509 | 13.341 | 20.255 | 15.071 |
| 8 | 0.7124 | 14.020 | 7.405  | 8.379  | 23.013 | 7.869  |
| 8 | 0.7134 | 15.816 | 13.386 | 19.552 | 8.759  | 2.493  |
| 8 | 0.7144 | 17.868 | 17.331 | 17.310 | 17.205 | 10.758 |
| 8 | 0.7154 | 9.569  | 15.520 | 10.570 | 28.576 | 8.066  |
| 8 | 0.7164 | 15.412 | 21.678 | 13.282 | 20.465 | 7.103  |
| 8 | 0.7174 | 7.885  | 6.636  | 8.634  | 3.220  | 2.594  |
| 8 | 0.7184 | 8.670  | 6.058  | 10.079 | 11.310 | 4.855  |
| 8 | 0.7194 | 11.936 | 16.163 | 11.990 | 24.627 | 9.291  |
| 8 | 0.7204 | 13.637 | 14.002 | 10.041 | 21.412 | 18.329 |
| 8 | 0.7214 | 14.952 | 8.497  | 12.655 | 18.695 | 10.653 |
| 8 | 0.7224 | 10.636 | 8.262  | 6.532  | 20.800 | 15.877 |
| 8 | 0.7234 | 15.957 | 10.558 | 10.736 | 16.745 | 17.462 |
| 8 | 0.7244 | 6.879  | 11.107 | 13.559 | 9.386  | 6.596  |
| 8 | 0.7254 | 12.311 | 3.867  | 9.378  | 15.972 | 14.838 |
| 8 | 0.7264 | 12.545 | 8.414  | 10.768 | 27.545 | 11.972 |
| 8 | 0.7274 | 9.841  | 9.532  | 6.737  | 18.288 | 15.247 |
| 8 | 0.7284 | 18.891 | 17.716 | 17.622 | 24.542 | 19.426 |
| 8 | 0.7294 | 23.401 | 17.463 | 20.409 | 12.219 | 13.296 |
| 8 | 0.7304 | 14.663 | 12.704 | 12.650 | 13.163 | 8.185  |
| 8 | 0.7314 | 7.235  | 12.688 | 8.277  | 12.508 | 5.312  |
| 8 | 0.7324 | 15.979 | 9.984  | 12.281 | 17.914 | 13.081 |
| 8 | 0.7334 | 12.319 | 10.375 | 11.692 | 15.192 | 12.437 |
| 8 | 0.7344 | 9.233  | 9.609  | 9.374  | 3.394  | 6.375  |
| 8 | 0.7354 | 3.131  | 3.625  | 2.616  | 5.870  | 8.076  |
| 8 | 0.7364 | 5.627  | 10.433 | 9.370  | 4.444  | 6.989  |
| 8 | 0.7374 | 10.277 | 7.003  | 8.676  | 9.775  | 12.150 |
| 8 | 0.7384 | 12.649 | 11.206 | 12.220 | 16.097 | 17.640 |
| 8 | 0.7394 | 9.663  | 9.614  | 8.034  | 9.510  | 14.485 |
| 8 | 0.7404 | 7.888  | 13.704 | 9.377  | 20.063 | 12.607 |
| 8 | 0.7414 | 9.822  | 12.549 | 10.862 | 27.847 | 15.179 |
| 8 | 0.7424 | 12.435 | 15.501 | 17.845 | 13.695 | 25.695 |
| 8 | 0.7434 | 21.598 | 10.561 | 21.542 | 25.515 | 21.696 |
| 8 | 0.7444 | 9.391  | 7.889  | 7.587  | 14.408 | 10.071 |



|   |        |        |        |        |        |        |
|---|--------|--------|--------|--------|--------|--------|
| 8 | 0.7454 | 9.201  | 4.195  | 7.568  | 10.096 | 11.658 |
| 8 | 0.7464 | 14.404 | 11.957 | 14.634 | 12.383 | 18.262 |
| 8 | 0.7474 | 11.633 | 11.687 | 11.893 | 11.829 | 7.827  |
| 8 | 0.7484 | 16.091 | 20.915 | 19.615 | 16.568 | 13.352 |
| 8 | 0.7494 | 14.772 | 16.321 | 12.001 | 14.003 | 14.083 |
| 8 | 0.7504 | 16.102 | 19.768 | 13.073 | 20.320 | 21.057 |
| 8 | 0.7514 | 10.327 | 9.672  | 10.828 | 18.678 | 13.951 |
| 8 | 0.7524 | 10.327 | 9.680  | 10.830 | 18.713 | 13.950 |
| 8 | 0.7534 | 18.312 | 18.753 | 19.268 | 16.278 | 14.199 |
| 8 | 0.7544 | 24.833 | 21.258 | 23.782 | 11.702 | 20.475 |
| 8 | 0.7554 | 17.127 | 13.663 | 16.885 | 16.605 | 12.092 |
| 8 | 0.7564 | 23.010 | 17.030 | 16.007 | 14.671 | 19.492 |
| 8 | 0.7574 | 23.824 | 15.469 | 21.400 | 19.316 | 12.672 |
| 8 | 0.7584 | 20.390 | 10.339 | 15.017 | 19.345 | 22.718 |
| 8 | 0.7594 | 25.213 | 11.944 | 15.329 | 15.089 | 12.345 |
| 8 | 0.7604 | 14.596 | 16.352 | 9.817  | 11.419 | 13.062 |
| 8 | 0.7614 | 12.785 | 14.950 | 10.926 | 14.159 | 14.987 |
| 8 | 0.7624 | 13.058 | 15.610 | 14.150 | 25.817 | 26.941 |
| 8 | 0.7634 | 19.351 | 14.654 | 18.681 | 21.083 | 10.294 |
| 8 | 0.7644 | 15.449 | 9.930  | 15.787 | 17.726 | 14.216 |
| 8 | 0.7654 | 10.191 | 6.864  | 9.882  | 7.942  | 5.430  |
| 8 | 0.7664 | 10.540 | 10.183 | 10.638 | 6.735  | 4.330  |
| 8 | 0.7674 | 9.645  | 6.672  | 9.608  | 8.825  | 7.796  |
| 8 | 0.7684 | 16.705 | 11.969 | 13.650 | 10.219 | 9.847  |
| 8 | 0.7694 | 15.742 | 14.597 | 13.429 | 3.389  | 14.691 |
| 8 | 0.7704 | 14.158 | 15.544 | 11.871 | 23.688 | 12.027 |
| 8 | 0.7714 | 16.903 | 10.075 | 15.305 | 14.453 | 11.327 |
| 8 | 0.7724 | 10.203 | 7.968  | 9.412  | 20.079 | 7.765  |
| 8 | 0.7734 | 16.513 | 11.462 | 13.442 | 16.153 | 3.002  |
| 8 | 0.7744 | 30.167 | 15.505 | 26.863 | 22.631 | 9.259  |
| 8 | 0.7754 | 20.675 | 8.681  | 14.467 | 25.372 | 20.353 |
| 8 | 0.7764 | 14.975 | 8.299  | 12.791 | 11.980 | 5.577  |
| 8 | 0.7774 | 24.223 | 21.352 | 24.076 | 15.516 | 13.443 |
| 8 | 0.7784 | 33.276 | 12.974 | 28.288 | 14.314 | 9.357  |
| 8 | 0.7794 | 23.917 | 20.078 | 22.315 | 18.954 | 16.739 |
| 8 | 0.7804 | 5.801  | 6.316  | 6.163  | 11.958 | 17.821 |
| 8 | 0.7814 | 23.853 | 17.129 | 24.902 | 37.080 | 15.654 |
| 8 | 0.7824 | 16.571 | 15.347 | 17.599 | 26.228 | 16.048 |
| 8 | 0.7834 | 13.544 | 11.680 | 14.690 | 16.451 | 20.277 |
| 8 | 0.7844 | 14.863 | 18.282 | 16.391 | 21.723 | 6.093  |
| 8 | 0.7854 | 18.286 | 18.111 | 24.882 | 14.013 | 10.782 |
| 8 | 0.7864 | 16.512 | 12.939 | 16.498 | 13.390 | 8.750  |
| 8 | 0.7874 | 24.513 | 14.617 | 23.924 | 28.380 | 15.396 |
| 8 | 0.7884 | 13.909 | 13.479 | 15.055 | 10.002 | 19.025 |
| 8 | 0.7894 | 23.930 | 18.827 | 19.182 | 14.003 | 26.154 |
| 8 | 0.7904 | 14.164 | 12.679 | 13.755 | 11.253 | 22.056 |
| 8 | 0.7914 | 21.501 | 15.849 | 17.155 | 35.754 | 23.460 |
| 8 | 0.7924 | 33.649 | 11.118 | 24.466 | 24.787 | 22.232 |
| 8 | 0.7934 | 10.471 | 5.622  | 10.454 | 17.672 | 13.949 |
| 8 | 0.7944 | 11.474 | 7.689  | 15.807 | 17.355 | 10.776 |

|   |        |        |        |        |        |        |
|---|--------|--------|--------|--------|--------|--------|
| 8 | 0.7954 | 15.602 | 11.584 | 14.415 | 16.879 | 23.386 |
| 8 | 0.7964 | 17.554 | 15.805 | 15.848 | 16.182 | 12.731 |
| 8 | 0.7974 | 26.177 | 22.946 | 25.582 | 24.270 | 17.616 |
| 8 | 0.7984 | 23.391 | 14.255 | 13.246 | 13.878 | 18.690 |
| 8 | 0.7994 | 7.212  | 5.708  | 6.283  | 12.856 | 10.969 |
| 8 | 0.8004 | 11.114 | 6.091  | 9.821  | 8.019  | 16.416 |
| 8 | 0.8014 | 11.119 | 6.097  | 9.824  | 8.016  | 16.502 |
| 8 | 0.8024 | 8.688  | 5.051  | 15.249 | 11.375 | 4.669  |
| 8 | 0.8034 | 11.404 | 12.488 | 15.807 | 9.090  | 14.904 |
| 8 | 0.8044 | 16.091 | 11.250 | 20.145 | 11.631 | 20.733 |
| 8 | 0.8054 | 5.355  | 4.577  | 4.659  | 6.838  | 4.859  |
| 8 | 0.8064 | 11.256 | 10.560 | 17.599 | 10.828 | 14.382 |
| 8 | 0.8074 | 7.941  | 7.156  | 10.099 | 7.267  | 10.694 |
| 8 | 0.8084 | 15.683 | 8.084  | 9.042  | 21.245 | 17.229 |
| 8 | 0.8094 | 15.583 | 8.047  | 8.979  | 21.415 | 17.229 |
| 8 | 0.8104 | 24.124 | 22.267 | 24.416 | 33.122 | 34.652 |
| 8 | 0.8114 | 15.620 | 16.417 | 18.767 | 11.200 | 16.725 |
| 8 | 0.8124 | 11.730 | 9.964  | 11.005 | 4.374  | 16.490 |
| 8 | 0.8134 | 8.765  | 6.765  | 6.061  | 13.629 | 20.341 |
| 8 | 0.8144 | 10.639 | 7.192  | 7.037  | 14.967 | 22.793 |
| 8 | 0.8154 | 18.257 | 9.721  | 10.293 | 7.306  | 17.121 |
| 8 | 0.8164 | 9.738  | 6.958  | 7.760  | 19.960 | 19.077 |
| 8 | 0.8174 | 15.043 | 13.970 | 12.998 | 18.604 | 20.405 |
| 8 | 0.8184 | 11.735 | 14.331 | 12.373 | 15.795 | 31.331 |
| 8 | 0.8194 | 9.070  | 12.429 | 7.542  | 19.225 | 13.089 |
| 8 | 0.8204 | 5.016  | 7.262  | 1.951  | 20.189 | 9.067  |
| 8 | 0.8214 | 13.939 | 8.068  | 11.774 | 5.910  | 10.283 |
| 8 | 0.8224 | 8.887  | 8.540  | 8.967  | 5.504  | 8.458  |
| 8 | 0.8234 | 15.414 | 15.456 | 16.847 | 8.243  | 7.211  |
| 8 | 0.8244 | 8.124  | 9.642  | 9.921  | 27.039 | 21.846 |
| 8 | 0.8254 | 18.214 | 17.528 | 16.888 | 25.791 | 25.577 |
| 8 | 0.8264 | 16.621 | 16.839 | 13.086 | 29.662 | 19.590 |
| 8 | 0.8274 | 17.415 | 9.155  | 13.347 | 23.021 | 8.997  |
| 8 | 0.8284 | 10.805 | 6.827  | 8.786  | 10.624 | 13.370 |
| 8 | 0.8294 | 6.457  | 7.307  | 8.346  | 9.606  | 11.969 |
| 8 | 0.8304 | 5.635  | 1.927  | 6.158  | 8.150  | 13.081 |
| 8 | 0.8314 | 16.198 | 6.878  | 13.901 | 16.513 | 14.271 |
| 8 | 0.8324 | 16.900 | 6.335  | 13.888 | 20.574 | 13.855 |
| 8 | 0.8334 | 16.525 | 13.020 | 15.787 | 12.297 | 10.321 |
| 8 | 0.8344 | 16.012 | 9.178  | 16.323 | 11.553 | 13.757 |
| 8 | 0.8354 | 8.450  | 4.552  | 8.558  | 16.500 | 21.594 |
| 8 | 0.8364 | 4.879  | 6.737  | 4.984  | 7.625  | 18.060 |
| 8 | 0.8374 | 10.791 | 10.344 | 5.898  | 18.672 | 17.986 |
| 8 | 0.8384 | 14.152 | 6.811  | 10.297 | 25.643 | 13.689 |
| 8 | 0.8394 | 15.261 | 10.268 | 14.218 | 25.849 | 13.858 |
| 8 | 0.8404 | 26.639 | 17.463 | 28.181 | 28.222 | 19.426 |
| 8 | 0.8414 | 19.635 | 13.630 | 16.161 | 21.251 | 8.797  |
| 8 | 0.8424 | 15.690 | 7.874  | 10.850 | 19.983 | 15.638 |
| 8 | 0.8434 | 14.671 | 7.154  | 11.332 | 15.582 | 21.915 |
| 8 | 0.8444 | 11.919 | 12.774 | 11.302 | 23.476 | 22.018 |

|   |        |        |        |        |        |        |
|---|--------|--------|--------|--------|--------|--------|
| 8 | 0.8454 | 15.771 | 11.586 | 23.688 | 16.555 | 20.993 |
| 8 | 0.8464 | 11.849 | 14.604 | 14.072 | 10.085 | 15.838 |
| 8 | 0.8474 | 10.898 | 10.675 | 13.440 | 16.483 | 16.625 |
| 8 | 0.8484 | 11.057 | 14.734 | 10.711 | 20.013 | 8.611  |
| 8 | 0.8494 | 16.979 | 14.637 | 12.682 | 22.716 | 12.230 |
| 8 | 0.8504 | 22.661 | 13.432 | 21.367 | 25.621 | 17.261 |
| 8 | 0.8514 | 15.817 | 8.569  | 18.000 | 18.163 | 5.176  |
| 8 | 0.8524 | 7.453  | 6.118  | 5.363  | 15.918 | 12.802 |
| 8 | 0.8534 | 16.016 | 14.853 | 13.506 | 18.785 | 19.233 |
| 8 | 0.8544 | 22.692 | 20.315 | 17.156 | 17.953 | 7.655  |
| 8 | 0.8554 | 8.865  | 15.353 | 10.397 | 12.368 | 3.569  |
| 8 | 0.8564 | 11.230 | 4.809  | 8.162  | 16.759 | 18.459 |
| 8 | 0.8574 | 10.723 | 12.339 | 12.774 | 16.975 | 20.615 |
| 8 | 0.8584 | 13.558 | 14.413 | 12.529 | 20.942 | 24.931 |
| 8 | 0.8594 | 9.382  | 12.930 | 9.800  | 9.776  | 11.571 |
| 8 | 0.8604 | 12.961 | 10.393 | 9.905  | 14.768 | 25.487 |
| 8 | 0.8614 | 15.953 | 15.115 | 13.586 | 13.521 | 21.017 |
| 8 | 0.8624 | 28.422 | 12.597 | 21.000 | 21.917 | 14.681 |
| 8 | 0.8634 | 15.037 | 18.008 | 15.779 | 17.456 | 12.558 |
| 8 | 0.8644 | 5.604  | 5.456  | 4.087  | 15.055 | 20.587 |
| 8 | 0.8654 | 10.032 | 12.336 | 11.051 | 18.952 | 22.544 |
| 8 | 0.8664 | 22.810 | 14.245 | 18.610 | 14.773 | 13.413 |
| 8 | 0.8674 | 16.073 | 17.296 | 13.871 | 16.350 | 9.342  |
| 8 | 0.8684 | 6.031  | 5.255  | 3.187  | 9.701  | 6.583  |
| 8 | 0.8694 | 7.154  | 4.095  | 4.781  | 10.065 | 6.252  |
| 8 | 0.8704 | 15.441 | 9.236  | 8.636  | 24.426 | 15.677 |
| 8 | 0.8714 | 20.546 | 17.862 | 15.237 | 29.765 | 16.115 |
| 8 | 0.8724 | 15.709 | 17.978 | 14.964 | 17.482 | 14.733 |
| 8 | 0.8734 | 18.393 | 16.584 | 17.596 | 13.799 | 19.718 |
| 8 | 0.8744 | 17.349 | 14.661 | 16.916 | 18.993 | 18.310 |
| 8 | 0.8754 | 6.793  | 10.395 | 7.615  | 17.994 | 15.426 |
| 8 | 0.8764 | 5.201  | 4.491  | 5.776  | 20.018 | 13.332 |
| 8 | 0.8774 | 10.508 | 5.920  | 7.737  | 20.662 | 10.415 |
| 8 | 0.8784 | 11.971 | 9.554  | 11.995 | 15.725 | 12.518 |
| 8 | 0.8794 | 8.315  | 13.566 | 11.438 | 16.164 | 12.718 |
| 8 | 0.8804 | 14.500 | 14.005 | 14.245 | 16.603 | 13.686 |
| 8 | 0.8814 | 18.931 | 14.650 | 16.499 | 20.776 | 14.214 |
| 8 | 0.8824 | 17.155 | 20.062 | 15.838 | 17.722 | 16.436 |
| 8 | 0.8834 | 7.888  | 9.258  | 8.048  | 21.767 | 20.285 |
| 8 | 0.8844 | 10.779 | 15.688 | 9.680  | 9.600  | 6.519  |
| 8 | 0.8854 | 18.371 | 15.302 | 14.046 | 15.599 | 6.373  |
| 8 | 0.8864 | 13.757 | 11.806 | 12.152 | 9.111  | 9.003  |
| 8 | 0.8874 | 13.299 | 10.526 | 17.478 | 13.146 | 11.966 |
| 8 | 0.8884 | 16.617 | 11.163 | 16.123 | 19.845 | 12.622 |
| 8 | 0.8894 | 13.183 | 11.080 | 12.514 | 19.008 | 10.369 |
| 8 | 0.8904 | 7.852  | 11.620 | 10.892 | 19.014 | 7.431  |
| 8 | 0.8914 | 6.907  | 7.829  | 8.827  | 16.665 | 8.300  |
| 8 | 0.8924 | 11.397 | 8.539  | 11.108 | 4.164  | 7.772  |
| 8 | 0.8934 | 15.128 | 10.313 | 16.673 | 18.698 | 14.146 |
| 8 | 0.8944 | 15.138 | 10.327 | 16.746 | 18.685 | 13.939 |

|   |        |        |        |        |        |        |
|---|--------|--------|--------|--------|--------|--------|
| 8 | 0.8954 | 13.826 | 8.797  | 13.162 | 24.782 | 17.398 |
| 8 | 0.8964 | 9.808  | 8.815  | 8.468  | 10.965 | 13.616 |
| 8 | 0.8974 | 8.898  | 8.270  | 11.619 | 14.523 | 9.731  |
| 8 | 0.8984 | 7.055  | 8.298  | 11.738 | 11.021 | 6.838  |
| 8 | 0.8994 | 11.018 | 9.338  | 9.761  | 13.290 | 12.818 |
| 8 | 0.9004 | 9.711  | 4.594  | 5.113  | 24.411 | 18.293 |
| 8 | 0.9014 | 12.186 | 10.854 | 13.866 | 12.267 | 17.329 |
| 8 | 0.9024 | 11.697 | 12.033 | 15.739 | 9.538  | 17.952 |
| 8 | 0.9034 | 10.989 | 11.843 | 16.088 | 12.090 | 8.311  |
| 8 | 0.9044 | 11.041 | 11.809 | 14.535 | 10.863 | 6.873  |
| 8 | 0.9054 | 9.542  | 12.576 | 12.055 | 23.272 | 8.269  |
| 8 | 0.9064 | 17.938 | 18.509 | 18.288 | 17.484 | 10.340 |
| 8 | 0.9074 | 18.274 | 21.308 | 16.010 | 16.647 | 11.253 |
| 8 | 0.9084 | 12.954 | 21.390 | 13.530 | 12.109 | 10.574 |
| 8 | 0.9094 | 16.892 | 17.635 | 16.445 | 15.069 | 9.637  |
| 8 | 0.9104 | 11.055 | 19.044 | 13.330 | 17.203 | 7.515  |
| 8 | 0.9114 | 11.063 | 19.048 | 13.326 | 17.281 | 7.502  |
| 8 | 0.9124 | 11.070 | 19.053 | 13.321 | 17.362 | 7.490  |
| 8 | 0.9134 | 13.691 | 18.180 | 16.940 | 8.232  | 9.348  |
| 8 | 0.9144 | 17.574 | 21.931 | 20.802 | 18.325 | 10.382 |
| 8 | 0.9154 | 15.844 | 21.315 | 18.838 | 20.202 | 12.242 |
| 8 | 0.9164 | 13.614 | 20.722 | 16.700 | 16.124 | 15.255 |
| 8 | 0.9174 | 16.065 | 17.663 | 20.712 | 22.075 | 7.311  |
| 8 | 0.9184 | 16.176 | 12.998 | 12.052 | 12.927 | 12.174 |
| 8 | 0.9194 | 14.896 | 12.180 | 12.923 | 13.688 | 12.787 |
| 8 | 0.9204 | 11.317 | 14.192 | 16.013 | 15.780 | 6.355  |
| 8 | 0.9214 | 12.286 | 14.235 | 15.823 | 11.725 | 12.098 |
| 8 | 0.9224 | 8.988  | 8.951  | 10.642 | 15.694 | 7.782  |
| 8 | 0.9234 | 12.564 | 6.873  | 12.763 | 9.945  | 10.165 |
| 8 | 0.9244 | 12.654 | 9.693  | 14.677 | 4.808  | 7.357  |
| 8 | 0.9254 | 8.080  | 10.137 | 13.517 | 8.874  | 12.461 |
| 8 | 0.9264 | 8.444  | 10.760 | 13.962 | 9.887  | 7.778  |
| 8 | 0.9274 | 8.413  | 10.778 | 13.911 | 9.955  | 7.948  |
| 8 | 0.9284 | 6.287  | 7.718  | 6.075  | 5.462  | 17.856 |
| 8 | 0.9294 | 4.423  | 6.670  | 7.155  | 6.170  | 7.312  |
| 8 | 0.9304 | 6.197  | 8.470  | 12.582 | 7.022  | 3.988  |
| 8 | 0.9314 | 8.390  | 8.255  | 14.752 | 23.520 | 4.574  |
| 8 | 0.9324 | 10.095 | 14.115 | 17.239 | 32.723 | 9.652  |
| 8 | 0.9334 | 7.603  | 9.610  | 13.714 | 18.903 | 11.537 |
| 8 | 0.9344 | 6.109  | 13.301 | 7.607  | 18.386 | 9.338  |
| 8 | 0.9354 | 9.553  | 9.668  | 9.787  | 12.345 | 3.603  |
| 8 | 0.9364 | 11.654 | 9.163  | 15.333 | 9.265  | 8.188  |
| 8 | 0.9374 | 16.715 | 22.216 | 25.687 | 21.944 | 14.680 |
| 8 | 0.9384 | 17.131 | 24.414 | 20.665 | 31.509 | 20.785 |
| 8 | 0.9394 | 20.005 | 28.134 | 21.053 | 30.953 | 15.870 |
| 8 | 0.9404 | 17.635 | 23.090 | 21.826 | 21.528 | 11.614 |
| 8 | 0.9414 | 13.180 | 18.546 | 13.572 | 12.286 | 20.311 |
| 8 | 0.9424 | 15.177 | 20.579 | 23.338 | 13.235 | 10.044 |
| 8 | 0.9434 | 12.083 | 13.077 | 18.917 | 20.192 | 19.064 |
| 8 | 0.9444 | 11.045 | 10.186 | 14.955 | 31.594 | 12.214 |

|   |        |        |        |        |        |        |
|---|--------|--------|--------|--------|--------|--------|
| 8 | 0.9454 | 16.541 | 13.308 | 18.079 | 9.502  | 13.575 |
| 8 | 0.9464 | 24.598 | 25.981 | 33.611 | 22.924 | 10.469 |
| 8 | 0.9474 | 23.536 | 21.330 | 23.180 | 13.666 | 6.147  |
| 8 | 0.9484 | 12.445 | 13.869 | 10.903 | 18.173 | 7.951  |
| 8 | 0.9494 | 6.450  | 6.748  | 10.051 | 19.308 | 8.542  |
| 8 | 0.9504 | 15.148 | 14.628 | 25.117 | 15.580 | 13.638 |
| 8 | 0.9514 | 12.922 | 13.766 | 15.913 | 22.210 | 12.505 |
| 8 | 0.9524 | 12.885 | 13.753 | 15.927 | 22.054 | 12.617 |
| 8 | 0.9534 | 18.477 | 23.994 | 22.726 | 31.953 | 15.844 |
| 8 | 0.9544 | 14.429 | 19.740 | 14.764 | 25.889 | 14.667 |
| 8 | 0.9554 | 9.407  | 12.101 | 11.047 | 15.594 | 8.846  |
| 8 | 0.9564 | 12.048 | 17.060 | 15.261 | 17.444 | 13.034 |
| 8 | 0.9574 | 15.705 | 19.354 | 21.053 | 15.509 | 14.668 |
| 8 | 0.9584 | 12.571 | 13.839 | 15.533 | 15.806 | 11.908 |
| 8 | 0.9594 | 11.220 | 10.432 | 13.776 | 9.916  | 13.451 |
| 8 | 0.9604 | 15.499 | 15.107 | 16.975 | 9.552  | 18.488 |
| 8 | 0.9614 | 18.361 | 20.317 | 22.446 | 7.705  | 18.414 |
| 8 | 0.9624 | 13.617 | 15.342 | 15.619 | 12.162 | 15.139 |
| 8 | 0.9634 | 9.306  | 12.322 | 12.593 | 9.648  | 12.092 |
| 8 | 0.9644 | 8.856  | 8.098  | 11.312 | 10.176 | 10.957 |
| 8 | 0.9654 | 13.389 | 9.418  | 15.830 | 14.170 | 8.354  |
| 8 | 0.9664 | 21.050 | 22.167 | 21.014 | 19.469 | 16.627 |
| 8 | 0.9674 | 12.037 | 14.133 | 14.763 | 16.535 | 18.237 |
| 8 | 0.9684 | 20.533 | 16.345 | 29.784 | 21.011 | 9.915  |
| 8 | 0.9694 | 13.953 | 11.944 | 15.164 | 19.534 | 12.879 |
| 8 | 0.9704 | 10.481 | 16.848 | 12.271 | 12.580 | 17.015 |
| 8 | 0.9714 | 10.499 | 16.735 | 12.172 | 12.470 | 17.165 |
| 8 | 0.9724 | 10.348 | 11.837 | 7.807  | 19.884 | 17.991 |
| 8 | 0.9734 | 7.250  | 10.334 | 9.132  | 11.873 | 17.735 |
| 8 | 0.9744 | 7.321  | 10.258 | 9.022  | 11.707 | 18.155 |
| 8 | 0.9754 | 11.920 | 9.269  | 9.887  | 9.699  | 21.219 |
| 8 | 0.9764 | 12.941 | 8.873  | 14.036 | 10.980 | 6.654  |
| 8 | 0.9774 | 23.939 | 21.275 | 27.904 | 18.580 | 9.075  |
| 8 | 0.9784 | 14.260 | 12.503 | 13.290 | 18.467 | 17.207 |
| 8 | 0.9794 | 14.667 | 11.919 | 14.301 | 15.009 | 15.979 |
| 8 | 0.9804 | 14.644 | 14.127 | 14.133 | 21.560 | 19.657 |
| 8 | 0.9814 | 13.728 | 16.744 | 13.542 | 12.359 | 22.307 |
| 8 | 0.9824 | 16.830 | 11.947 | 10.136 | 10.415 | 15.827 |
| 8 | 0.9834 | 12.673 | 14.057 | 10.635 | 23.446 | 16.291 |
| 8 | 0.9844 | 15.280 | 14.398 | 18.285 | 20.747 | 20.307 |
| 8 | 0.9854 | 20.783 | 15.427 | 20.326 | 29.087 | 23.528 |
| 8 | 0.9864 | 19.519 | 8.606  | 14.597 | 27.336 | 24.484 |
| 8 | 0.9874 | 14.639 | 7.821  | 6.486  | 14.751 | 24.096 |
| 8 | 0.9884 | 18.618 | 18.194 | 15.410 | 14.272 | 23.664 |
| 8 | 0.9894 | 18.652 | 18.229 | 15.391 | 14.271 | 23.637 |
| 8 | 0.9904 | 11.046 | 9.369  | 9.507  | 16.000 | 13.964 |
| 8 | 0.9914 | 13.311 | 9.171  | 9.252  | 19.590 | 20.660 |
| 8 | 0.9924 | 10.877 | 8.753  | 4.819  | 20.981 | 12.654 |
| 8 | 0.9934 | 10.818 | 9.760  | 5.487  | 22.640 | 19.061 |
| 8 | 0.9944 | 12.793 | 10.574 | 10.660 | 25.628 | 23.153 |

|   |        |        |        |        |        |        |
|---|--------|--------|--------|--------|--------|--------|
| 8 | 0.9954 | 26.882 | 18.901 | 18.138 | 15.795 | 21.772 |
| 8 | 0.9964 | 17.524 | 16.642 | 13.370 | 16.268 | 12.750 |
| 8 | 0.9974 | 5.969  | 9.881  | 4.594  | 19.081 | 10.809 |
| 8 | 0.9984 | 13.437 | 9.175  | 5.553  | 20.060 | 20.419 |
| 8 | 0.9994 | 9.722  | 6.994  | 4.951  | 8.330  | 13.189 |
| 8 | 1.0004 | 10.380 | 7.979  | 6.965  | 10.930 | 14.007 |
| 8 | 1.0014 | 19.507 | 9.765  | 12.902 | 20.383 | 19.975 |
| 8 | 1.0024 | 7.714  | 11.653 | 6.579  | 12.168 | 10.978 |
| 8 | 1.0034 | 8.344  | 16.026 | 5.190  | 23.417 | 28.030 |
| 8 | 1.0044 | 13.430 | 18.919 | 10.035 | 23.430 | 20.500 |
| 8 | 1.0054 | 10.554 | 8.228  | 3.883  | 28.908 | 17.326 |
| 8 | 1.0064 | 15.198 | 16.570 | 9.556  | 27.011 | 26.054 |
| 8 | 1.0074 | 19.603 | 13.760 | 15.703 | 17.532 | 19.216 |
| 8 | 1.0084 | 14.393 | 18.664 | 12.331 | 32.304 | 27.764 |
| 8 | 1.0094 | 11.314 | 9.068  | 11.849 | 17.298 | 17.150 |
| 8 | 1.0104 | 13.439 | 18.091 | 9.487  | 22.614 | 15.790 |
| 8 | 1.0114 | 16.076 | 16.573 | 13.765 | 27.542 | 25.047 |
| 8 | 1.0124 | 18.026 | 13.160 | 11.719 | 10.169 | 11.430 |
| 8 | 1.0134 | 12.329 | 12.399 | 9.930  | 15.777 | 19.924 |
| 8 | 1.0144 | 13.238 | 6.184  | 5.333  | 17.880 | 34.127 |
| 8 | 1.0154 | 8.112  | 9.551  | 3.739  | 15.442 | 12.098 |
| 8 | 1.0164 | 13.493 | 11.073 | 6.809  | 25.235 | 23.825 |
| 8 | 1.0174 | 14.952 | 10.235 | 7.946  | 20.061 | 19.879 |
| 8 | 1.0184 | 11.631 | 13.321 | 9.649  | 20.877 | 16.815 |
| 8 | 1.0194 | 3.146  | 4.517  | 4.010  | 14.143 | 10.379 |
| 8 | 1.0204 | 16.428 | 9.310  | 9.665  | 17.082 | 19.611 |
| 8 | 1.0214 | 21.035 | 14.452 | 17.593 | 18.818 | 17.543 |
| 8 | 1.0224 | 22.126 | 10.753 | 13.142 | 26.628 | 24.970 |
| 8 | 1.0234 | 10.434 | 9.371  | 9.914  | 9.765  | 13.968 |
| 8 | 1.0244 | 8.574  | 8.197  | 8.563  | 10.690 | 13.527 |
| 8 | 1.0254 | 28.811 | 18.449 | 16.909 | 12.955 | 26.415 |
| 8 | 1.0264 | 24.834 | 24.352 | 18.434 | 15.982 | 14.803 |
| 8 | 1.0274 | 14.209 | 19.870 | 14.338 | 12.897 | 15.178 |
| 8 | 1.0284 | 26.576 | 18.356 | 19.010 | 26.031 | 13.740 |
| 8 | 1.0294 | 21.955 | 15.927 | 12.518 | 17.746 | 31.749 |
| 8 | 1.0304 | 31.352 | 14.575 | 15.593 | 17.251 | 34.364 |
| 8 | 1.0314 | 14.715 | 8.742  | 6.558  | 11.346 | 18.291 |
| 8 | 1.0324 | 12.104 | 5.849  | 5.048  | 18.008 | 31.000 |
| 8 | 1.0334 | 20.266 | 22.228 | 19.701 | 13.768 | 21.180 |
| 8 | 1.0344 | 26.719 | 32.830 | 23.756 | 12.522 | 23.618 |
| 8 | 1.0354 | 17.604 | 20.235 | 11.999 | 15.274 | 12.711 |
| 8 | 1.0364 | 17.560 | 14.671 | 12.058 | 6.683  | 14.276 |
| 8 | 1.0374 | 14.972 | 16.759 | 8.999  | 17.965 | 19.047 |
| 8 | 1.0384 | 8.301  | 8.741  | 3.528  | 9.139  | 12.449 |
| 8 | 1.0394 | 4.550  | 9.104  | 6.702  | 13.108 | 20.923 |
| 8 | 1.0404 | 10.287 | 9.569  | 6.773  | 8.080  | 13.385 |
| 8 | 1.0414 | 6.777  | 11.936 | 8.940  | 11.183 | 6.066  |
| 8 | 1.0424 | 9.394  | 12.013 | 8.357  | 13.902 | 12.537 |
| 8 | 1.0434 | 12.058 | 11.854 | 8.281  | 24.719 | 12.554 |
| 8 | 1.0444 | 22.711 | 17.808 | 19.724 | 10.323 | 23.632 |

|   |        |        |        |        |        |        |
|---|--------|--------|--------|--------|--------|--------|
| 8 | 1.0454 | 12.205 | 10.415 | 12.390 | 13.677 | 14.077 |
| 8 | 1.0464 | 17.488 | 9.110  | 11.229 | 16.512 | 19.274 |
| 8 | 1.0474 | 21.162 | 9.554  | 14.543 | 20.714 | 20.552 |
| 8 | 1.0484 | 8.714  | 5.000  | 4.885  | 8.940  | 15.309 |
| 8 | 1.0494 | 16.149 | 17.299 | 14.149 | 14.618 | 9.485  |
| 8 | 1.0504 | 10.650 | 10.365 | 7.960  | 11.230 | 16.939 |
| 8 | 1.0514 | 17.627 | 11.661 | 15.850 | 18.088 | 14.712 |
| 8 | 1.0524 | 15.515 | 16.565 | 14.114 | 12.790 | 18.038 |
| 8 | 1.0534 | 12.081 | 8.479  | 9.877  | 11.288 | 13.963 |
| 8 | 1.0544 | 8.718  | 9.114  | 7.647  | 8.545  | 3.781  |
| 8 | 1.0554 | 13.287 | 8.228  | 9.409  | 15.140 | 12.510 |
| 8 | 1.0564 | 14.692 | 12.958 | 8.730  | 12.144 | 12.926 |
| 8 | 1.0574 | 20.735 | 9.174  | 12.256 | 17.384 | 30.710 |
| 8 | 1.0584 | 10.894 | 11.888 | 10.472 | 7.602  | 20.455 |
| 8 | 1.0594 | 12.925 | 9.312  | 8.272  | 14.936 | 26.525 |
| 8 | 1.0604 | 19.805 | 9.234  | 12.586 | 20.284 | 23.206 |
| 8 | 1.0614 | 24.535 | 13.610 | 15.547 | 23.665 | 34.530 |
| 8 | 1.0624 | 22.660 | 14.311 | 17.243 | 20.672 | 19.367 |
| 8 | 1.0634 | 17.575 | 12.843 | 14.160 | 18.198 | 13.091 |
| 8 | 1.0644 | 12.292 | 12.242 | 13.530 | 12.268 | 18.254 |
| 8 | 1.0654 | 16.509 | 11.421 | 16.753 | 21.538 | 19.282 |
| 8 | 1.0664 | 26.907 | 18.160 | 19.815 | 13.660 | 25.093 |
| 8 | 1.0674 | 21.934 | 14.182 | 19.865 | 23.569 | 24.267 |
| 8 | 1.0684 | 11.582 | 15.725 | 16.644 | 21.845 | 25.485 |
| 8 | 1.0694 | 17.972 | 16.058 | 20.216 | 25.191 | 26.270 |
| 8 | 1.0704 | 13.289 | 9.333  | 12.502 | 28.552 | 31.094 |
| 8 | 1.0714 | 20.403 | 19.102 | 18.674 | 15.641 | 31.666 |
| 8 | 1.0724 | 37.053 | 24.581 | 30.949 | 12.441 | 34.070 |
| 8 | 1.0734 | 25.133 | 14.744 | 23.021 | 12.931 | 22.345 |
| 8 | 1.0744 | 23.871 | 19.637 | 21.584 | 18.144 | 13.845 |
| 8 | 1.0754 | 27.291 | 19.679 | 19.505 | 12.823 | 20.506 |
| 8 | 1.0764 | 25.722 | 21.449 | 14.652 | 20.954 | 22.432 |
| 8 | 1.0774 | 14.834 | 15.558 | 17.243 | 29.062 | 13.724 |
| 8 | 1.0784 | 13.750 | 12.768 | 12.604 | 31.380 | 23.396 |
| 8 | 1.0794 | 15.665 | 14.158 | 11.940 | 16.821 | 25.281 |
| 8 | 1.0804 | 15.713 | 7.340  | 12.104 | 12.355 | 20.005 |
| 8 | 1.0814 | 16.251 | 5.867  | 10.337 | 12.218 | 26.081 |
| 8 | 1.0824 | 9.782  | 12.768 | 8.413  | 12.436 | 19.381 |
| 8 | 1.0834 | 9.486  | 6.075  | 4.014  | 18.056 | 20.504 |
| 8 | 1.0844 | 16.430 | 14.667 | 17.759 | 9.657  | 18.244 |
| 8 | 1.0854 | 8.420  | 13.832 | 9.928  | 12.006 | 15.812 |
| 8 | 1.0864 | 18.152 | 12.720 | 11.201 | 23.774 | 23.672 |
| 8 | 1.0874 | 13.135 | 9.912  | 6.300  | 18.372 | 17.530 |
| 8 | 1.0884 | 12.784 | 11.147 | 10.059 | 22.967 | 23.980 |
| 8 | 1.0894 | 16.779 | 10.305 | 9.243  | 7.469  | 22.531 |
| 8 | 1.0904 | 13.685 | 15.513 | 9.661  | 29.135 | 29.473 |
| 8 | 1.0914 | 13.085 | 10.861 | 7.844  | 7.446  | 18.471 |
| 8 | 1.0924 | 11.509 | 10.151 | 5.562  | 11.698 | 19.630 |
| 8 | 1.0934 | 18.288 | 26.580 | 17.402 | 18.472 | 16.057 |
| 8 | 1.0944 | 18.535 | 26.544 | 17.676 | 18.496 | 16.001 |

|   |        |        |        |        |        |        |
|---|--------|--------|--------|--------|--------|--------|
| 8 | 1.0954 | 10.113 | 15.888 | 9.256  | 18.451 | 12.304 |
| 8 | 1.0964 | 10.550 | 11.735 | 8.936  | 11.168 | 21.223 |
| 8 | 1.0974 | 14.766 | 12.695 | 5.960  | 19.003 | 28.026 |
| 8 | 1.0984 | 17.147 | 20.182 | 12.982 | 22.237 | 22.350 |
| 8 | 1.0994 | 18.321 | 14.313 | 18.995 | 17.531 | 18.495 |
| 8 | 1.1004 | 15.711 | 14.836 | 16.105 | 20.632 | 23.358 |
| 8 | 1.1014 | 15.801 | 14.881 | 16.192 | 20.617 | 23.156 |
| 8 | 1.1024 | 17.794 | 16.648 | 18.213 | 16.158 | 9.954  |
| 8 | 1.1034 | 15.742 | 16.206 | 14.649 | 23.479 | 5.402  |
| 8 | 1.1044 | 9.529  | 13.595 | 10.252 | 16.788 | 9.966  |
| 8 | 1.1054 | 30.090 | 25.418 | 23.672 | 27.008 | 13.604 |
| 8 | 1.1064 | 20.586 | 14.491 | 18.090 | 10.354 | 2.033  |
| 8 | 1.1074 | 4.698  | 7.923  | 6.725  | 6.818  | 3.302  |
| 8 | 1.1084 | 8.707  | 5.839  | 8.306  | 7.511  | 0.807  |
| 8 | 1.1094 | 0.000  | 0.000  | 0.000  | 0.000  | 0.000  |
| 9 | 0.0005 | 0.000  | 0.000  | 0.000  | 0.000  | 0.000  |
| 9 | 0.0015 | 0.000  | 0.000  | 0.000  | 0.000  | 0.000  |
| 9 | 0.0025 | 14.736 | 11.593 | 12.195 | 21.288 | 23.003 |
| 9 | 0.0035 | 19.380 | 15.285 | 16.570 | 18.426 | 17.328 |
| 9 | 0.0045 | 9.806  | 10.674 | 8.082  | 27.227 | 22.310 |
| 9 | 0.0055 | 9.917  | 13.114 | 7.995  | 29.641 | 14.600 |
| 9 | 0.0065 | 11.500 | 5.150  | 11.443 | 11.834 | 6.382  |
| 9 | 0.0075 | 14.616 | 17.396 | 11.300 | 34.032 | 18.174 |
| 9 | 0.0085 | 12.166 | 8.452  | 8.925  | 9.277  | 9.786  |
| 9 | 0.0095 | 7.136  | 6.431  | 5.499  | 20.117 | 7.051  |
| 9 | 0.0105 | 7.128  | 6.520  | 5.585  | 19.932 | 7.083  |
| 9 | 0.0115 | 10.948 | 8.946  | 11.255 | 23.624 | 8.418  |
| 9 | 0.0125 | 14.128 | 11.498 | 13.200 | 12.014 | 19.525 |
| 9 | 0.0135 | 10.201 | 7.227  | 6.925  | 7.448  | 12.140 |
| 9 | 0.0145 | 8.810  | 8.528  | 10.325 | 12.404 | 11.887 |
| 9 | 0.0155 | 9.904  | 10.593 | 9.511  | 26.621 | 25.344 |
| 9 | 0.0165 | 11.831 | 8.302  | 9.594  | 14.675 | 13.347 |
| 9 | 0.0175 | 8.846  | 8.271  | 8.842  | 22.356 | 21.096 |
| 9 | 0.0185 | 12.923 | 15.017 | 9.583  | 26.427 | 20.235 |
| 9 | 0.0195 | 14.489 | 12.114 | 14.552 | 25.157 | 24.950 |
| 9 | 0.0205 | 19.161 | 11.367 | 11.075 | 19.367 | 11.137 |
| 9 | 0.0215 | 15.565 | 19.006 | 11.595 | 20.684 | 10.194 |
| 9 | 0.0225 | 16.647 | 17.649 | 18.312 | 19.527 | 10.970 |
| 9 | 0.0235 | 22.453 | 18.833 | 22.173 | 22.099 | 29.197 |
| 9 | 0.0245 | 13.780 | 14.091 | 16.414 | 22.634 | 13.373 |
| 9 | 0.0255 | 13.058 | 12.209 | 13.532 | 10.022 | 7.105  |
| 9 | 0.0265 | 16.063 | 13.718 | 15.116 | 8.492  | 12.377 |
| 9 | 0.0275 | 18.702 | 11.771 | 16.240 | 17.743 | 16.895 |
| 9 | 0.0285 | 10.565 | 12.990 | 11.348 | 14.101 | 18.058 |
| 9 | 0.0295 | 12.380 | 24.004 | 15.248 | 21.963 | 25.508 |
| 9 | 0.0305 | 14.274 | 16.261 | 16.937 | 15.951 | 18.338 |
| 9 | 0.0315 | 15.932 | 21.421 | 19.777 | 10.638 | 11.860 |
| 9 | 0.0325 | 11.369 | 10.871 | 11.699 | 7.826  | 12.913 |
| 9 | 0.0335 | 22.793 | 37.760 | 23.196 | 21.951 | 14.969 |
| 9 | 0.0345 | 29.919 | 43.292 | 26.725 | 19.894 | 18.343 |



|   |        |        |        |        |        |        |
|---|--------|--------|--------|--------|--------|--------|
| 9 | 0.0355 | 16.323 | 23.394 | 13.215 | 18.559 | 16.700 |
| 9 | 0.0365 | 15.719 | 21.864 | 16.234 | 22.691 | 28.356 |
| 9 | 0.0375 | 20.023 | 22.923 | 22.447 | 8.702  | 19.502 |
| 9 | 0.0385 | 17.925 | 17.916 | 17.120 | 13.688 | 23.597 |
| 9 | 0.0395 | 20.787 | 20.019 | 17.632 | 18.290 | 14.006 |
| 9 | 0.0405 | 28.921 | 18.334 | 18.323 | 24.930 | 16.088 |
| 9 | 0.0415 | 17.414 | 16.548 | 16.497 | 17.637 | 7.939  |
| 9 | 0.0425 | 26.587 | 16.815 | 18.731 | 11.938 | 19.314 |
| 9 | 0.0435 | 24.282 | 18.771 | 21.408 | 16.411 | 20.581 |
| 9 | 0.0445 | 19.060 | 16.097 | 20.348 | 19.134 | 15.840 |
| 9 | 0.0455 | 15.703 | 11.966 | 13.641 | 3.092  | 17.125 |
| 9 | 0.0465 | 13.466 | 15.800 | 17.860 | 3.578  | 8.682  |
| 9 | 0.0475 | 15.390 | 13.950 | 20.537 | 10.790 | 24.564 |
| 9 | 0.0485 | 23.724 | 15.359 | 21.972 | 10.370 | 18.357 |
| 9 | 0.0495 | 23.305 | 12.598 | 26.035 | 18.181 | 23.760 |
| 9 | 0.0505 | 28.214 | 21.605 | 21.732 | 13.316 | 12.184 |
| 9 | 0.0515 | 26.302 | 21.861 | 25.988 | 10.962 | 23.097 |
| 9 | 0.0525 | 22.945 | 28.667 | 18.725 | 7.970  | 18.236 |
| 9 | 0.0535 | 17.847 | 18.479 | 21.834 | 12.824 | 19.335 |
| 9 | 0.0545 | 12.833 | 10.806 | 11.937 | 21.477 | 23.535 |
| 9 | 0.0555 | 19.605 | 15.290 | 19.511 | 11.300 | 17.345 |
| 9 | 0.0565 | 13.521 | 7.820  | 11.681 | 4.370  | 3.600  |
| 9 | 0.0575 | 10.154 | 6.240  | 9.293  | 8.070  | 7.188  |
| 9 | 0.0585 | 21.033 | 17.755 | 17.103 | 17.140 | 12.313 |
| 9 | 0.0595 | 29.807 | 16.507 | 20.936 | 16.209 | 25.686 |
| 9 | 0.0605 | 13.536 | 8.017  | 10.465 | 12.777 | 14.095 |
| 9 | 0.0615 | 17.229 | 14.117 | 11.937 | 13.682 | 26.432 |
| 9 | 0.0625 | 20.921 | 13.376 | 15.199 | 13.830 | 23.881 |
| 9 | 0.0635 | 18.025 | 8.225  | 11.603 | 12.508 | 10.712 |
| 9 | 0.0645 | 10.630 | 11.115 | 8.499  | 17.491 | 12.397 |
| 9 | 0.0655 | 19.283 | 17.049 | 18.375 | 6.887  | 20.625 |
| 9 | 0.0665 | 13.977 | 23.248 | 17.079 | 18.026 | 11.044 |
| 9 | 0.0675 | 14.241 | 23.299 | 20.092 | 17.735 | 14.500 |
| 9 | 0.0685 | 11.507 | 19.097 | 12.934 | 12.080 | 11.970 |
| 9 | 0.0695 | 14.264 | 11.840 | 10.451 | 9.221  | 13.224 |
| 9 | 0.0705 | 24.266 | 20.384 | 15.712 | 6.303  | 6.640  |
| 9 | 0.0715 | 20.703 | 10.556 | 12.555 | 7.116  | 11.957 |
| 9 | 0.0725 | 20.673 | 10.502 | 12.534 | 7.116  | 11.975 |
| 9 | 0.0735 | 33.742 | 27.667 | 22.539 | 19.402 | 22.223 |
| 9 | 0.0745 | 18.978 | 15.525 | 14.199 | 16.568 | 18.745 |
| 9 | 0.0755 | 24.484 | 11.402 | 17.296 | 20.806 | 21.083 |
| 9 | 0.0765 | 18.327 | 11.819 | 14.924 | 15.550 | 15.560 |
| 9 | 0.0775 | 29.419 | 26.099 | 26.555 | 11.051 | 12.795 |
| 9 | 0.0785 | 31.210 | 23.191 | 22.692 | 11.541 | 19.360 |
| 9 | 0.0795 | 21.312 | 18.301 | 17.432 | 6.694  | 20.194 |
| 9 | 0.0805 | 22.178 | 12.640 | 13.886 | 9.777  | 14.122 |
| 9 | 0.0815 | 26.699 | 18.325 | 20.924 | 10.814 | 13.090 |
| 9 | 0.0825 | 25.207 | 19.957 | 18.905 | 7.969  | 9.961  |
| 9 | 0.0835 | 24.125 | 23.229 | 26.256 | 30.875 | 17.091 |
| 9 | 0.0845 | 26.508 | 24.962 | 28.271 | 16.413 | 15.716 |

|   |        |        |        |        |        |        |
|---|--------|--------|--------|--------|--------|--------|
| 9 | 0.0855 | 36.504 | 26.008 | 29.211 | 15.099 | 24.869 |
| 9 | 0.0865 | 29.062 | 16.939 | 18.583 | 21.434 | 22.648 |
| 9 | 0.0875 | 31.997 | 17.594 | 20.049 | 16.077 | 21.254 |
| 9 | 0.0885 | 8.656  | 7.706  | 11.424 | 12.910 | 12.497 |
| 9 | 0.0895 | 13.622 | 7.712  | 17.167 | 9.224  | 6.694  |
| 9 | 0.0905 | 18.527 | 16.750 | 14.309 | 6.296  | 17.125 |
| 9 | 0.0915 | 18.658 | 14.095 | 16.673 | 5.494  | 14.377 |
| 9 | 0.0925 | 27.199 | 15.007 | 23.634 | 13.702 | 5.974  |
| 9 | 0.0935 | 10.764 | 10.496 | 12.806 | 20.263 | 9.495  |
| 9 | 0.0945 | 26.493 | 21.241 | 24.281 | 18.048 | 18.072 |
| 9 | 0.0955 | 14.634 | 18.830 | 12.855 | 25.275 | 7.300  |
| 9 | 0.0965 | 26.361 | 25.758 | 14.935 | 16.083 | 10.239 |
| 9 | 0.0975 | 12.344 | 6.065  | 11.193 | 12.602 | 10.369 |
| 9 | 0.0985 | 11.979 | 12.059 | 10.111 | 15.855 | 12.192 |
| 9 | 0.0995 | 9.930  | 9.424  | 7.774  | 9.055  | 8.394  |
| 9 | 0.1005 | 21.416 | 15.261 | 22.283 | 20.025 | 14.264 |
| 9 | 0.1015 | 17.834 | 10.266 | 16.747 | 16.620 | 9.170  |
| 9 | 0.1025 | 20.028 | 8.262  | 17.211 | 28.720 | 10.995 |
| 9 | 0.1035 | 12.583 | 16.933 | 11.153 | 14.599 | 6.114  |
| 9 | 0.1045 | 29.304 | 25.789 | 25.267 | 12.403 | 13.321 |
| 9 | 0.1055 | 24.764 | 16.451 | 18.374 | 23.937 | 21.359 |
| 9 | 0.1065 | 19.336 | 6.880  | 12.049 | 23.163 | 18.006 |
| 9 | 0.1075 | 12.471 | 12.217 | 6.380  | 16.907 | 23.719 |
| 9 | 0.1085 | 15.770 | 18.934 | 14.522 | 23.676 | 17.909 |
| 9 | 0.1095 | 19.250 | 14.236 | 23.980 | 14.272 | 8.236  |
| 9 | 0.1105 | 11.816 | 11.862 | 14.567 | 15.180 | 6.681  |
| 9 | 0.1115 | 15.846 | 10.854 | 13.760 | 15.847 | 14.220 |
| 9 | 0.1125 | 19.905 | 7.238  | 10.947 | 29.119 | 21.559 |
| 9 | 0.1135 | 13.689 | 10.664 | 13.293 | 15.023 | 23.504 |
| 9 | 0.1145 | 5.577  | 3.408  | 8.734  | 3.426  | 12.195 |
| 9 | 0.1155 | 17.204 | 15.213 | 17.886 | 9.193  | 15.972 |
| 9 | 0.1165 | 11.892 | 7.638  | 16.659 | 7.674  | 6.163  |
| 9 | 0.1175 | 17.197 | 19.524 | 20.413 | 15.765 | 21.914 |
| 9 | 0.1185 | 12.275 | 10.883 | 15.070 | 16.398 | 17.075 |
| 9 | 0.1195 | 11.629 | 14.210 | 10.095 | 15.081 | 10.335 |
| 9 | 0.1205 | 10.294 | 14.302 | 12.171 | 12.099 | 12.423 |
| 9 | 0.1215 | 15.287 | 11.548 | 16.492 | 14.695 | 9.758  |
| 9 | 0.1225 | 10.476 | 12.548 | 14.259 | 6.750  | 19.637 |
| 9 | 0.1235 | 16.357 | 20.954 | 19.184 | 17.000 | 17.107 |
| 9 | 0.1245 | 16.458 | 11.992 | 12.070 | 19.970 | 26.528 |
| 9 | 0.1255 | 18.513 | 15.735 | 14.425 | 14.782 | 16.153 |
| 9 | 0.1265 | 8.002  | 11.895 | 12.186 | 12.038 | 10.265 |
| 9 | 0.1275 | 6.448  | 8.303  | 5.704  | 18.086 | 11.752 |
| 9 | 0.1285 | 18.506 | 12.412 | 17.634 | 10.653 | 16.441 |
| 9 | 0.1295 | 22.580 | 17.589 | 17.120 | 12.397 | 12.839 |
| 9 | 0.1305 | 36.777 | 23.086 | 26.302 | 6.286  | 12.422 |
| 9 | 0.1315 | 17.171 | 15.275 | 16.622 | 13.616 | 18.732 |
| 9 | 0.1325 | 11.074 | 11.278 | 16.493 | 13.092 | 25.843 |
| 9 | 0.1335 | 9.774  | 8.700  | 13.124 | 10.434 | 5.755  |
| 9 | 0.1345 | 7.191  | 10.797 | 9.116  | 9.158  | 7.661  |

|   |        |        |        |        |        |        |
|---|--------|--------|--------|--------|--------|--------|
| 9 | 0.1355 | 22.594 | 12.297 | 12.825 | 13.735 | 14.049 |
| 9 | 0.1365 | 23.779 | 11.943 | 21.935 | 9.857  | 19.768 |
| 9 | 0.1375 | 30.585 | 18.299 | 30.003 | 10.038 | 11.011 |
| 9 | 0.1385 | 40.400 | 19.460 | 23.848 | 13.860 | 19.937 |
| 9 | 0.1395 | 20.675 | 19.215 | 20.002 | 18.158 | 35.418 |
| 9 | 0.1405 | 15.201 | 11.018 | 9.913  | 11.473 | 25.363 |
| 9 | 0.1415 | 9.245  | 11.110 | 7.435  | 13.579 | 26.141 |
| 9 | 0.1425 | 35.950 | 22.042 | 26.809 | 16.416 | 24.175 |
| 9 | 0.1435 | 15.482 | 10.944 | 13.858 | 10.905 | 18.907 |
| 9 | 0.1445 | 23.033 | 16.768 | 19.885 | 18.818 | 15.618 |
| 9 | 0.1455 | 33.064 | 18.246 | 27.706 | 21.653 | 19.359 |
| 9 | 0.1465 | 18.982 | 20.742 | 25.087 | 24.838 | 14.762 |
| 9 | 0.1475 | 14.642 | 10.845 | 9.474  | 21.281 | 17.386 |
| 9 | 0.1485 | 19.496 | 11.074 | 10.456 | 25.376 | 22.616 |
| 9 | 0.1495 | 19.619 | 8.176  | 12.357 | 23.333 | 16.568 |
| 9 | 0.1505 | 17.051 | 7.735  | 15.274 | 22.112 | 14.710 |
| 9 | 0.1515 | 13.492 | 5.724  | 8.228  | 10.669 | 10.396 |
| 9 | 0.1525 | 22.248 | 16.572 | 13.428 | 14.044 | 10.327 |
| 9 | 0.1535 | 16.989 | 12.735 | 20.431 | 11.469 | 7.423  |
| 9 | 0.1545 | 15.078 | 11.773 | 23.582 | 14.755 | 14.024 |
| 9 | 0.1555 | 17.423 | 11.809 | 17.979 | 12.585 | 17.869 |
| 9 | 0.1565 | 16.349 | 13.794 | 19.837 | 14.824 | 11.654 |
| 9 | 0.1575 | 16.325 | 6.671  | 12.143 | 15.730 | 11.120 |
| 9 | 0.1585 | 12.449 | 7.825  | 17.408 | 7.458  | 7.764  |
| 9 | 0.1595 | 5.433  | 4.955  | 11.269 | 12.586 | 12.756 |
| 9 | 0.1605 | 19.833 | 14.447 | 20.813 | 8.582  | 8.689  |
| 9 | 0.1615 | 14.609 | 14.065 | 13.914 | 12.943 | 9.979  |
| 9 | 0.1625 | 13.277 | 7.584  | 9.423  | 12.303 | 10.323 |
| 9 | 0.1635 | 13.654 | 6.625  | 10.030 | 10.792 | 13.103 |
| 9 | 0.1645 | 20.737 | 8.252  | 15.528 | 12.791 | 11.460 |
| 9 | 0.1655 | 21.566 | 10.483 | 17.003 | 11.517 | 8.795  |
| 9 | 0.1665 | 15.201 | 14.203 | 19.725 | 12.348 | 15.590 |
| 9 | 0.1675 | 11.512 | 6.979  | 8.732  | 16.151 | 16.075 |
| 9 | 0.1685 | 7.181  | 6.539  | 5.062  | 13.870 | 19.100 |
| 9 | 0.1695 | 13.071 | 8.992  | 12.579 | 8.605  | 5.694  |
| 9 | 0.1705 | 17.189 | 11.911 | 15.666 | 12.505 | 7.268  |
| 9 | 0.1715 | 20.008 | 12.020 | 17.705 | 6.896  | 5.120  |
| 9 | 0.1725 | 18.972 | 16.188 | 24.499 | 6.823  | 10.994 |
| 9 | 0.1735 | 16.238 | 15.381 | 20.307 | 7.927  | 10.813 |
| 9 | 0.1745 | 13.268 | 6.558  | 13.189 | 7.091  | 8.728  |
| 9 | 0.1755 | 19.766 | 7.533  | 12.853 | 8.921  | 4.062  |
| 9 | 0.1765 | 7.145  | 18.617 | 9.041  | 19.022 | 15.200 |
| 9 | 0.1775 | 22.510 | 21.579 | 18.770 | 12.725 | 9.969  |
| 9 | 0.1785 | 10.903 | 12.051 | 12.748 | 17.886 | 12.200 |
| 9 | 0.1795 | 16.033 | 17.667 | 15.810 | 9.792  | 7.693  |
| 9 | 0.1805 | 15.774 | 16.441 | 19.125 | 15.379 | 12.691 |
| 9 | 0.1815 | 10.951 | 9.074  | 12.236 | 9.329  | 13.698 |
| 9 | 0.1825 | 12.603 | 14.103 | 20.048 | 14.134 | 21.181 |
| 9 | 0.1835 | 9.580  | 15.820 | 9.783  | 12.367 | 11.501 |
| 9 | 0.1845 | 13.610 | 14.879 | 16.106 | 7.733  | 6.780  |

|   |        |        |        |        |        |        |
|---|--------|--------|--------|--------|--------|--------|
| 9 | 0.1855 | 19.001 | 12.433 | 20.279 | 18.789 | 12.934 |
| 9 | 0.1865 | 29.716 | 27.699 | 24.219 | 15.813 | 7.143  |
| 9 | 0.1875 | 15.349 | 15.959 | 14.072 | 8.538  | 9.222  |
| 9 | 0.1885 | 35.675 | 20.409 | 27.877 | 11.619 | 8.446  |
| 9 | 0.1895 | 6.713  | 9.054  | 7.953  | 6.097  | 6.206  |
| 9 | 0.1905 | 31.070 | 28.117 | 26.729 | 19.940 | 10.950 |
| 9 | 0.1915 | 12.454 | 7.068  | 8.514  | 12.996 | 10.318 |
| 9 | 0.1925 | 15.602 | 6.589  | 11.300 | 6.189  | 3.757  |
| 9 | 0.1935 | 16.785 | 18.535 | 18.221 | 12.156 | 7.911  |
| 9 | 0.1945 | 15.041 | 22.482 | 21.649 | 16.281 | 10.399 |
| 9 | 0.1955 | 5.997  | 8.724  | 7.568  | 10.248 | 7.940  |
| 9 | 0.1965 | 5.557  | 6.726  | 8.741  | 8.232  | 10.643 |
| 9 | 0.1975 | 17.582 | 12.746 | 13.727 | 16.680 | 13.943 |
| 9 | 0.1985 | 26.363 | 14.594 | 25.156 | 19.451 | 17.781 |
| 9 | 0.1995 | 39.993 | 21.604 | 34.727 | 12.943 | 16.028 |
| 9 | 0.2005 | 17.545 | 17.960 | 17.239 | 10.900 | 11.755 |
| 9 | 0.2015 | 12.846 | 15.094 | 11.574 | 10.899 | 13.817 |
| 9 | 0.2025 | 9.855  | 8.629  | 6.635  | 10.743 | 7.843  |
| 9 | 0.2035 | 9.864  | 8.899  | 6.697  | 10.859 | 7.818  |
| 9 | 0.2045 | 6.799  | 5.398  | 4.448  | 4.062  | 4.917  |
| 9 | 0.2055 | 6.151  | 2.507  | 3.172  | 9.429  | 12.198 |
| 9 | 0.2065 | 9.461  | 5.022  | 5.705  | 5.951  | 17.879 |
| 9 | 0.2075 | 10.575 | 6.528  | 10.016 | 5.708  | 7.393  |
| 9 | 0.2085 | 14.031 | 11.515 | 15.331 | 8.394  | 5.410  |
| 9 | 0.2095 | 9.895  | 9.458  | 11.103 | 7.884  | 7.809  |
| 9 | 0.2105 | 15.445 | 9.894  | 16.145 | 17.243 | 13.180 |
| 9 | 0.2115 | 18.329 | 11.141 | 13.895 | 8.002  | 16.868 |
| 9 | 0.2125 | 9.562  | 5.171  | 10.516 | 6.579  | 8.422  |
| 9 | 0.2135 | 22.028 | 14.459 | 14.289 | 11.292 | 12.812 |
| 9 | 0.2145 | 15.898 | 17.965 | 16.840 | 11.738 | 12.308 |
| 9 | 0.2155 | 16.221 | 12.629 | 18.408 | 10.046 | 12.158 |
| 9 | 0.2165 | 13.226 | 5.807  | 8.686  | 19.229 | 9.203  |
| 9 | 0.2175 | 7.161  | 7.356  | 6.497  | 7.716  | 10.560 |
| 9 | 0.2185 | 9.316  | 11.737 | 11.858 | 14.018 | 9.576  |
| 9 | 0.2195 | 21.127 | 13.460 | 21.834 | 13.986 | 17.576 |
| 9 | 0.2205 | 16.205 | 8.015  | 12.445 | 6.310  | 14.074 |
| 9 | 0.2215 | 18.376 | 15.351 | 26.003 | 10.516 | 5.983  |
| 9 | 0.2225 | 11.935 | 11.816 | 12.752 | 14.374 | 16.681 |
| 9 | 0.2235 | 17.554 | 16.415 | 22.377 | 12.431 | 11.091 |
| 9 | 0.2245 | 14.638 | 10.743 | 14.297 | 8.865  | 5.405  |
| 9 | 0.2255 | 20.531 | 9.917  | 20.347 | 8.178  | 12.115 |
| 9 | 0.2265 | 25.950 | 16.668 | 21.454 | 11.147 | 14.343 |
| 9 | 0.2275 | 20.169 | 16.929 | 26.426 | 15.095 | 9.364  |
| 9 | 0.2285 | 19.169 | 9.655  | 14.482 | 12.833 | 9.647  |
| 9 | 0.2295 | 14.425 | 8.052  | 14.975 | 4.224  | 6.982  |
| 9 | 0.2305 | 7.261  | 3.607  | 5.830  | 6.194  | 7.301  |
| 9 | 0.2315 | 12.416 | 7.132  | 9.434  | 8.071  | 8.894  |
| 9 | 0.2325 | 35.460 | 20.015 | 27.850 | 6.253  | 16.234 |
| 9 | 0.2335 | 25.050 | 9.866  | 11.163 | 13.402 | 17.205 |
| 9 | 0.2345 | 16.564 | 13.181 | 17.608 | 10.730 | 18.907 |

|   |        |        |        |        |        |        |
|---|--------|--------|--------|--------|--------|--------|
| 9 | 0.2355 | 13.589 | 10.514 | 14.364 | 12.764 | 9.528  |
| 9 | 0.2365 | 21.506 | 15.505 | 19.770 | 15.077 | 10.955 |
| 9 | 0.2375 | 16.144 | 17.331 | 12.373 | 10.876 | 11.027 |
| 9 | 0.2385 | 19.523 | 14.569 | 12.257 | 15.246 | 26.309 |
| 9 | 0.2395 | 16.199 | 6.764  | 6.978  | 24.068 | 26.476 |
| 9 | 0.2405 | 32.061 | 18.168 | 21.178 | 17.053 | 21.298 |
| 9 | 0.2415 | 13.160 | 14.725 | 9.080  | 17.469 | 22.515 |
| 9 | 0.2425 | 17.062 | 13.033 | 14.736 | 13.116 | 10.613 |
| 9 | 0.2435 | 21.545 | 16.189 | 21.557 | 6.169  | 14.318 |
| 9 | 0.2445 | 10.899 | 11.200 | 9.919  | 14.750 | 15.006 |
| 9 | 0.2455 | 21.650 | 24.811 | 20.805 | 16.862 | 20.115 |
| 9 | 0.2465 | 14.115 | 6.216  | 8.788  | 18.616 | 26.649 |
| 9 | 0.2475 | 19.076 | 10.350 | 10.750 | 10.829 | 30.793 |
| 9 | 0.2485 | 16.113 | 11.410 | 9.158  | 11.843 | 24.830 |
| 9 | 0.2495 | 25.254 | 18.719 | 23.356 | 5.980  | 14.536 |
| 9 | 0.2505 | 27.080 | 13.409 | 19.568 | 9.018  | 22.848 |
| 9 | 0.2515 | 24.269 | 10.440 | 18.667 | 18.104 | 29.949 |
| 9 | 0.2525 | 22.499 | 13.737 | 17.843 | 18.951 | 22.529 |
| 9 | 0.2535 | 17.526 | 11.301 | 15.252 | 12.564 | 20.659 |
| 9 | 0.2545 | 11.799 | 5.983  | 6.757  | 10.896 | 8.886  |
| 9 | 0.2555 | 11.271 | 9.699  | 7.724  | 8.407  | 7.045  |
| 9 | 0.2565 | 16.774 | 15.830 | 24.761 | 14.433 | 16.772 |
| 9 | 0.2575 | 18.949 | 16.504 | 28.691 | 11.803 | 17.546 |
| 9 | 0.2585 | 17.439 | 18.125 | 19.386 | 13.665 | 17.932 |
| 9 | 0.2595 | 9.144  | 10.707 | 3.528  | 15.765 | 23.925 |
| 9 | 0.2605 | 30.736 | 14.920 | 18.487 | 7.138  | 9.301  |
| 9 | 0.2615 | 31.031 | 17.700 | 26.727 | 14.543 | 17.713 |
| 9 | 0.2625 | 22.440 | 12.112 | 25.345 | 14.660 | 8.686  |
| 9 | 0.2635 | 10.277 | 6.868  | 10.196 | 5.674  | 9.935  |
| 9 | 0.2645 | 15.335 | 16.462 | 16.829 | 18.832 | 10.665 |
| 9 | 0.2655 | 13.935 | 11.849 | 11.685 | 11.736 | 10.093 |
| 9 | 0.2665 | 19.218 | 10.607 | 8.680  | 11.938 | 18.941 |
| 9 | 0.2675 | 17.297 | 11.664 | 10.136 | 13.483 | 18.142 |
| 9 | 0.2685 | 23.904 | 13.381 | 22.078 | 9.072  | 9.719  |
| 9 | 0.2695 | 12.619 | 11.829 | 18.093 | 9.618  | 23.710 |
| 9 | 0.2705 | 5.265  | 3.821  | 6.782  | 13.355 | 14.947 |
| 9 | 0.2715 | 6.768  | 7.401  | 4.190  | 18.863 | 15.704 |
| 9 | 0.2725 | 2.752  | 7.894  | 4.596  | 12.636 | 14.237 |
| 9 | 0.2735 | 3.510  | 5.403  | 8.218  | 4.714  | 19.059 |
| 9 | 0.2745 | 7.670  | 7.416  | 6.136  | 4.984  | 19.625 |
| 9 | 0.2755 | 11.729 | 13.823 | 14.896 | 8.438  | 14.831 |
| 9 | 0.2765 | 6.085  | 10.333 | 8.965  | 4.237  | 6.243  |
| 9 | 0.2775 | 38.205 | 20.948 | 27.076 | 5.213  | 6.445  |
| 9 | 0.2785 | 10.990 | 5.951  | 8.113  | 5.360  | 4.443  |
| 9 | 0.2795 | 7.218  | 4.392  | 4.169  | 8.785  | 7.294  |
| 9 | 0.2805 | 5.957  | 3.693  | 3.124  | 9.528  | 6.547  |
| 9 | 0.2815 | 2.989  | 1.747  | 2.126  | 6.943  | 8.409  |
| 9 | 0.2825 | 9.703  | 8.461  | 9.780  | 5.889  | 9.875  |
| 9 | 0.2835 | 8.636  | 8.183  | 10.456 | 6.014  | 10.511 |
| 9 | 0.2845 | 21.228 | 12.741 | 15.832 | 9.613  | 14.680 |

|   |        |        |        |        |        |        |
|---|--------|--------|--------|--------|--------|--------|
| 9 | 0.2855 | 8.905  | 6.289  | 7.995  | 1.065  | 4.456  |
| 9 | 0.2865 | 8.563  | 5.317  | 6.164  | 1.543  | 3.129  |
| 9 | 0.2875 | 5.034  | 2.837  | 4.800  | 2.833  | 7.690  |
| 9 | 0.2885 | 12.300 | 13.613 | 18.061 | 6.143  | 11.057 |
| 9 | 0.2895 | 12.866 | 4.802  | 11.337 | 6.795  | 11.258 |
| 9 | 0.2905 | 10.064 | 9.778  | 9.213  | 6.689  | 9.889  |
| 9 | 0.2915 | 10.066 | 9.780  | 9.215  | 6.690  | 9.891  |
| 9 | 0.2925 | 12.132 | 4.511  | 8.270  | 3.100  | 12.572 |
| 9 | 0.2935 | 16.766 | 11.221 | 15.937 | 5.035  | 11.971 |
| 9 | 0.2945 | 22.286 | 12.761 | 18.137 | 9.369  | 13.543 |
| 9 | 0.2955 | 12.917 | 10.750 | 13.084 | 15.717 | 11.881 |
| 9 | 0.2965 | 34.191 | 26.137 | 24.985 | 18.273 | 11.476 |
| 9 | 0.2975 | 22.620 | 16.368 | 15.541 | 13.923 | 9.307  |
| 9 | 0.2985 | 15.122 | 11.340 | 9.409  | 5.782  | 15.094 |
| 9 | 0.2995 | 24.507 | 16.833 | 19.591 | 11.942 | 21.463 |
| 9 | 0.3005 | 7.629  | 6.506  | 8.375  | 3.380  | 14.593 |
| 9 | 0.3015 | 24.198 | 18.069 | 20.597 | 6.857  | 18.398 |
| 9 | 0.3025 | 40.621 | 18.569 | 26.478 | 7.471  | 8.739  |
| 9 | 0.3035 | 29.610 | 11.623 | 20.395 | 7.545  | 12.189 |
| 9 | 0.3045 | 20.106 | 6.944  | 9.083  | 4.829  | 22.618 |
| 9 | 0.3055 | 28.638 | 18.343 | 21.454 | 7.509  | 12.550 |
| 9 | 0.3065 | 25.892 | 20.934 | 30.252 | 11.723 | 19.316 |
| 9 | 0.3075 | 37.300 | 20.746 | 27.406 | 13.861 | 28.563 |
| 9 | 0.3085 | 38.047 | 18.920 | 27.263 | 10.421 | 20.882 |
| 9 | 0.3095 | 11.783 | 13.177 | 14.635 | 15.006 | 17.068 |
| 9 | 0.3105 | 14.216 | 10.900 | 11.289 | 10.615 | 6.948  |
| 9 | 0.3115 | 15.563 | 11.022 | 11.244 | 7.097  | 15.544 |
| 9 | 0.3125 | 12.943 | 6.275  | 7.518  | 8.861  | 11.737 |
| 9 | 0.3135 | 26.655 | 18.255 | 17.950 | 5.960  | 12.739 |
| 9 | 0.3145 | 19.315 | 9.398  | 12.409 | 4.069  | 9.260  |
| 9 | 0.3155 | 7.847  | 8.812  | 6.676  | 5.327  | 7.715  |
| 9 | 0.3165 | 8.792  | 6.618  | 5.452  | 11.883 | 21.877 |
| 9 | 0.3175 | 8.737  | 8.089  | 6.746  | 12.042 | 12.326 |
| 9 | 0.3185 | 11.373 | 6.121  | 4.702  | 3.062  | 11.583 |
| 9 | 0.3195 | 20.954 | 13.655 | 11.320 | 12.276 | 21.155 |
| 9 | 0.3205 | 20.823 | 11.606 | 9.439  | 7.536  | 11.135 |
| 9 | 0.3215 | 24.934 | 12.373 | 13.712 | 7.146  | 13.508 |
| 9 | 0.3225 | 11.765 | 8.114  | 10.123 | 7.578  | 12.536 |
| 9 | 0.3235 | 11.387 | 7.120  | 8.370  | 5.857  | 11.993 |
| 9 | 0.3245 | 16.822 | 12.267 | 12.760 | 14.182 | 21.636 |
| 9 | 0.3255 | 15.030 | 9.294  | 10.331 | 7.376  | 10.294 |
| 9 | 0.3265 | 10.016 | 11.786 | 10.181 | 18.548 | 11.128 |
| 9 | 0.3275 | 9.786  | 11.734 | 10.081 | 18.528 | 11.099 |
| 9 | 0.3285 | 12.181 | 11.526 | 11.950 | 11.293 | 10.688 |
| 9 | 0.3295 | 14.330 | 16.224 | 16.353 | 12.773 | 12.596 |
| 9 | 0.3305 | 23.508 | 24.967 | 22.382 | 24.051 | 16.841 |
| 9 | 0.3315 | 17.716 | 19.674 | 18.539 | 14.744 | 12.391 |
| 9 | 0.3325 | 23.222 | 18.151 | 18.517 | 12.544 | 5.534  |
| 9 | 0.3335 | 27.338 | 16.875 | 24.335 | 7.179  | 16.232 |
| 9 | 0.3345 | 20.218 | 16.491 | 19.120 | 10.333 | 23.330 |

|   |        |        |        |        |        |        |
|---|--------|--------|--------|--------|--------|--------|
| 9 | 0.3355 | 7.577  | 7.490  | 5.459  | 8.787  | 28.254 |
| 9 | 0.3365 | 14.691 | 10.573 | 9.268  | 11.573 | 17.893 |
| 9 | 0.3375 | 20.816 | 13.029 | 17.171 | 9.970  | 15.734 |
| 9 | 0.3385 | 18.012 | 10.444 | 14.909 | 17.565 | 15.433 |
| 9 | 0.3395 | 15.193 | 9.293  | 12.659 | 14.491 | 11.555 |
| 9 | 0.3405 | 21.761 | 13.889 | 12.612 | 10.399 | 13.326 |
| 9 | 0.3415 | 14.812 | 9.836  | 11.894 | 6.548  | 21.890 |
| 9 | 0.3425 | 16.804 | 13.304 | 12.842 | 23.073 | 16.437 |
| 9 | 0.3435 | 26.443 | 16.930 | 13.251 | 5.929  | 21.368 |
| 9 | 0.3445 | 32.058 | 25.016 | 27.184 | 18.840 | 25.957 |
| 9 | 0.3455 | 9.045  | 5.625  | 8.322  | 7.707  | 14.408 |
| 9 | 0.3465 | 9.010  | 5.625  | 8.298  | 7.716  | 14.439 |
| 9 | 0.3475 | 10.033 | 12.255 | 11.859 | 7.421  | 21.860 |
| 9 | 0.3485 | 19.561 | 18.279 | 17.436 | 8.186  | 10.096 |
| 9 | 0.3495 | 13.210 | 16.956 | 11.311 | 15.118 | 9.697  |
| 9 | 0.3505 | 10.366 | 10.092 | 12.208 | 9.553  | 18.061 |
| 9 | 0.3515 | 17.172 | 13.432 | 12.401 | 15.976 | 24.305 |
| 9 | 0.3525 | 18.362 | 22.327 | 24.180 | 13.549 | 17.800 |
| 9 | 0.3535 | 14.222 | 12.591 | 13.571 | 13.680 | 10.103 |
| 9 | 0.3545 | 13.329 | 9.757  | 13.324 | 7.663  | 9.421  |
| 9 | 0.3555 | 11.915 | 11.878 | 8.005  | 14.628 | 16.128 |
| 9 | 0.3565 | 23.112 | 14.861 | 13.242 | 13.815 | 12.843 |
| 9 | 0.3575 | 15.638 | 16.005 | 12.790 | 10.626 | 9.912  |
| 9 | 0.3585 | 12.436 | 13.607 | 13.220 | 6.379  | 4.674  |
| 9 | 0.3595 | 7.233  | 4.993  | 5.370  | 9.598  | 9.021  |
| 9 | 0.3605 | 24.365 | 19.687 | 19.833 | 9.061  | 4.650  |
| 9 | 0.3615 | 15.379 | 13.937 | 19.543 | 17.837 | 7.314  |
| 9 | 0.3625 | 9.849  | 16.007 | 18.174 | 23.720 | 11.366 |
| 9 | 0.3635 | 15.989 | 15.240 | 20.194 | 26.402 | 11.773 |
| 9 | 0.3645 | 16.339 | 12.094 | 20.260 | 19.358 | 5.155  |
| 9 | 0.3655 | 16.542 | 14.987 | 12.490 | 11.385 | 6.092  |
| 9 | 0.3665 | 26.001 | 12.895 | 19.996 | 16.760 | 22.698 |
| 9 | 0.3675 | 24.573 | 13.978 | 24.270 | 6.027  | 11.951 |
| 9 | 0.3685 | 24.305 | 7.467  | 22.069 | 16.232 | 10.238 |
| 9 | 0.3695 | 9.629  | 7.646  | 8.586  | 13.477 | 12.095 |
| 9 | 0.3705 | 10.922 | 3.567  | 4.405  | 8.724  | 16.677 |
| 9 | 0.3715 | 28.541 | 14.867 | 18.370 | 8.422  | 12.682 |
| 9 | 0.3725 | 23.537 | 20.294 | 19.850 | 14.790 | 15.297 |
| 9 | 0.3735 | 18.337 | 12.493 | 16.545 | 7.987  | 10.246 |
| 9 | 0.3745 | 18.857 | 20.508 | 14.248 | 19.339 | 10.362 |
| 9 | 0.3755 | 21.082 | 14.661 | 16.031 | 15.441 | 10.085 |
| 9 | 0.3765 | 12.296 | 7.465  | 5.613  | 17.336 | 11.656 |
| 9 | 0.3775 | 27.156 | 19.166 | 20.521 | 15.734 | 20.043 |
| 9 | 0.3785 | 30.371 | 23.645 | 24.253 | 10.118 | 18.818 |
| 9 | 0.3795 | 20.817 | 18.316 | 14.768 | 11.382 | 15.953 |
| 9 | 0.3805 | 14.643 | 13.706 | 11.652 | 6.101  | 16.652 |
| 9 | 0.3815 | 19.791 | 18.214 | 17.041 | 10.450 | 10.021 |
| 9 | 0.3825 | 14.668 | 10.247 | 12.512 | 7.890  | 19.933 |
| 9 | 0.3835 | 11.635 | 11.062 | 11.925 | 16.787 | 14.947 |
| 9 | 0.3845 | 4.522  | 7.592  | 4.484  | 8.397  | 6.765  |

|   |        |        |        |        |        |        |
|---|--------|--------|--------|--------|--------|--------|
| 9 | 0.3855 | 19.886 | 17.143 | 18.194 | 12.499 | 10.547 |
| 9 | 0.3865 | 6.723  | 4.256  | 10.026 | 9.847  | 8.332  |
| 9 | 0.3875 | 6.545  | 13.273 | 10.620 | 11.046 | 6.358  |
| 9 | 0.3885 | 8.992  | 11.934 | 7.071  | 12.681 | 10.950 |
| 9 | 0.3895 | 9.804  | 6.002  | 9.262  | 4.128  | 6.747  |
| 9 | 0.3905 | 24.389 | 16.584 | 25.012 | 5.313  | 14.012 |
| 9 | 0.3915 | 13.944 | 9.668  | 13.843 | 7.936  | 5.990  |
| 9 | 0.3925 | 7.452  | 5.689  | 5.498  | 7.831  | 2.727  |
| 9 | 0.3935 | 14.454 | 18.639 | 12.784 | 10.040 | 4.851  |
| 9 | 0.3945 | 7.727  | 3.726  | 7.820  | 8.652  | 3.144  |
| 9 | 0.3955 | 13.921 | 11.801 | 9.309  | 15.244 | 6.632  |
| 9 | 0.3965 | 10.239 | 6.457  | 3.895  | 12.334 | 10.533 |
| 9 | 0.3975 | 14.437 | 10.170 | 9.896  | 7.709  | 12.601 |
| 9 | 0.3985 | 15.241 | 10.521 | 14.601 | 6.802  | 10.003 |
| 9 | 0.3995 | 13.545 | 9.625  | 10.806 | 7.876  | 7.075  |
| 9 | 0.4005 | 15.823 | 10.822 | 17.390 | 6.153  | 6.516  |
| 9 | 0.4015 | 10.084 | 6.782  | 10.087 | 9.192  | 15.875 |
| 9 | 0.4025 | 12.847 | 6.161  | 6.098  | 7.213  | 10.036 |
| 9 | 0.4035 | 13.835 | 12.261 | 15.461 | 6.023  | 13.736 |
| 9 | 0.4045 | 6.486  | 6.996  | 7.936  | 6.446  | 12.163 |
| 9 | 0.4055 | 20.012 | 19.004 | 21.124 | 6.862  | 5.213  |
| 9 | 0.4065 | 14.337 | 18.628 | 16.234 | 6.921  | 11.062 |
| 9 | 0.4075 | 11.389 | 7.003  | 7.838  | 4.641  | 11.754 |
| 9 | 0.4085 | 16.609 | 7.815  | 12.491 | 7.426  | 10.364 |
| 9 | 0.4095 | 19.428 | 17.392 | 15.011 | 10.835 | 7.959  |
| 9 | 0.4105 | 19.417 | 20.166 | 16.568 | 11.293 | 12.253 |
| 9 | 0.4115 | 7.460  | 6.654  | 9.892  | 7.257  | 9.527  |
| 9 | 0.4125 | 8.747  | 8.046  | 6.644  | 6.139  | 6.575  |
| 9 | 0.4135 | 14.798 | 12.535 | 12.403 | 4.887  | 6.583  |
| 9 | 0.4145 | 18.770 | 18.949 | 14.786 | 9.516  | 8.234  |
| 9 | 0.4155 | 21.097 | 16.109 | 14.654 | 6.023  | 11.093 |
| 9 | 0.4165 | 13.628 | 14.481 | 9.778  | 14.593 | 8.001  |
| 9 | 0.4175 | 14.010 | 12.945 | 15.002 | 5.477  | 13.958 |
| 9 | 0.4185 | 12.002 | 8.291  | 8.837  | 4.746  | 8.064  |
| 9 | 0.4195 | 23.834 | 18.874 | 18.005 | 11.267 | 9.288  |
| 9 | 0.4205 | 14.536 | 16.076 | 15.921 | 5.135  | 11.555 |
| 9 | 0.4215 | 17.949 | 25.394 | 20.260 | 10.597 | 7.971  |
| 9 | 0.4225 | 17.304 | 15.538 | 14.123 | 4.543  | 8.024  |
| 9 | 0.4235 | 16.206 | 26.597 | 16.669 | 10.894 | 10.780 |
| 9 | 0.4245 | 12.742 | 13.692 | 11.396 | 3.444  | 2.373  |
| 9 | 0.4255 | 12.886 | 13.071 | 11.569 | 4.420  | 11.159 |
| 9 | 0.4265 | 5.283  | 5.333  | 4.597  | 6.384  | 10.741 |
| 9 | 0.4275 | 10.256 | 12.261 | 10.470 | 9.986  | 4.136  |
| 9 | 0.4285 | 10.858 | 7.500  | 9.762  | 4.332  | 6.081  |
| 9 | 0.4295 | 9.915  | 7.243  | 12.421 | 2.904  | 6.380  |
| 9 | 0.4305 | 15.104 | 15.363 | 14.649 | 3.447  | 8.685  |
| 9 | 0.4315 | 22.305 | 21.979 | 22.127 | 6.302  | 8.238  |
| 9 | 0.4325 | 21.585 | 20.568 | 22.537 | 5.157  | 5.882  |
| 9 | 0.4335 | 15.161 | 17.113 | 16.715 | 6.041  | 7.958  |
| 9 | 0.4345 | 18.502 | 18.355 | 18.773 | 13.127 | 5.247  |



|   |        |        |        |        |        |        |
|---|--------|--------|--------|--------|--------|--------|
| 9 | 0.4355 | 16.877 | 20.697 | 15.992 | 14.598 | 7.432  |
| 9 | 0.4365 | 17.844 | 20.849 | 17.058 | 13.137 | 7.571  |
| 9 | 0.4375 | 16.230 | 18.116 | 17.217 | 12.563 | 10.454 |
| 9 | 0.4385 | 18.833 | 20.278 | 14.689 | 15.591 | 5.845  |
| 9 | 0.4395 | 16.042 | 14.021 | 17.455 | 10.040 | 6.881  |
| 9 | 0.4405 | 18.177 | 16.639 | 19.721 | 7.251  | 12.613 |
| 9 | 0.4415 | 14.064 | 15.471 | 12.410 | 18.628 | 11.333 |
| 9 | 0.4425 | 17.369 | 18.009 | 17.695 | 16.191 | 13.600 |
| 9 | 0.4435 | 25.265 | 22.350 | 24.072 | 8.264  | 6.612  |
| 9 | 0.4445 | 16.541 | 16.912 | 17.516 | 10.870 | 14.901 |
| 9 | 0.4455 | 16.962 | 22.795 | 21.482 | 12.725 | 7.650  |
| 9 | 0.4465 | 19.653 | 17.711 | 23.100 | 12.359 | 7.990  |
| 9 | 0.4475 | 19.647 | 17.701 | 23.077 | 12.366 | 8.003  |
| 9 | 0.4485 | 12.035 | 13.222 | 9.528  | 5.998  | 8.578  |
| 9 | 0.4495 | 11.344 | 12.728 | 12.696 | 4.358  | 11.250 |
| 9 | 0.4505 | 10.606 | 11.352 | 11.189 | 11.234 | 10.161 |
| 9 | 0.4515 | 15.690 | 22.479 | 15.680 | 10.820 | 10.511 |
| 9 | 0.4525 | 14.750 | 17.780 | 11.890 | 14.088 | 13.060 |
| 9 | 0.4535 | 12.185 | 14.131 | 8.866  | 9.003  | 13.813 |
| 9 | 0.4545 | 18.378 | 23.351 | 19.188 | 16.715 | 9.580  |
| 9 | 0.4555 | 8.447  | 10.649 | 12.864 | 9.989  | 11.339 |
| 9 | 0.4565 | 5.542  | 5.860  | 8.291  | 8.510  | 10.052 |
| 9 | 0.4575 | 11.939 | 14.101 | 8.802  | 13.315 | 10.031 |
| 9 | 0.4585 | 10.301 | 10.983 | 7.510  | 8.526  | 19.502 |
| 9 | 0.4595 | 11.938 | 15.247 | 9.241  | 10.289 | 18.213 |
| 9 | 0.4605 | 21.956 | 19.655 | 20.225 | 12.934 | 15.881 |
| 9 | 0.4615 | 20.015 | 21.947 | 15.278 | 13.586 | 11.553 |
| 9 | 0.4625 | 17.446 | 22.626 | 19.186 | 21.530 | 8.785  |
| 9 | 0.4635 | 21.041 | 27.286 | 19.995 | 24.141 | 16.178 |
| 9 | 0.4645 | 13.964 | 16.744 | 15.625 | 16.566 | 7.836  |
| 9 | 0.4655 | 19.349 | 17.833 | 19.757 | 11.221 | 17.069 |
| 9 | 0.4665 | 8.938  | 17.444 | 13.030 | 14.183 | 14.013 |
| 9 | 0.4675 | 14.128 | 13.684 | 11.304 | 20.845 | 8.038  |
| 9 | 0.4685 | 12.333 | 10.075 | 7.612  | 16.999 | 17.178 |
| 9 | 0.4695 | 21.569 | 24.410 | 18.499 | 17.422 | 12.167 |
| 9 | 0.4705 | 12.411 | 20.527 | 14.072 | 18.562 | 14.490 |
| 9 | 0.4715 | 8.506  | 14.581 | 13.144 | 22.309 | 11.149 |
| 9 | 0.4725 | 3.426  | 6.207  | 10.192 | 14.291 | 5.122  |
| 9 | 0.4735 | 6.308  | 11.911 | 12.446 | 9.181  | 14.277 |
| 9 | 0.4745 | 17.324 | 15.771 | 21.976 | 10.162 | 14.983 |
| 9 | 0.4755 | 18.792 | 14.765 | 19.316 | 9.016  | 6.515  |
| 9 | 0.4765 | 13.017 | 16.619 | 21.380 | 8.873  | 13.724 |
| 9 | 0.4775 | 6.746  | 10.240 | 10.248 | 11.343 | 14.468 |
| 9 | 0.4785 | 10.609 | 8.548  | 13.705 | 10.701 | 11.954 |
| 9 | 0.4795 | 6.005  | 2.713  | 2.122  | 9.337  | 14.200 |
| 9 | 0.4805 | 3.746  | 1.674  | 1.513  | 8.169  | 10.845 |
| 9 | 0.4815 | 5.748  | 5.041  | 5.467  | 7.865  | 15.761 |
| 9 | 0.4825 | 9.893  | 17.563 | 13.636 | 24.751 | 7.682  |
| 9 | 0.4835 | 10.675 | 13.434 | 11.328 | 13.970 | 13.088 |
| 9 | 0.4845 | 13.068 | 10.831 | 10.983 | 13.618 | 11.332 |

|   |        |        |        |        |        |        |
|---|--------|--------|--------|--------|--------|--------|
| 9 | 0.4855 | 13.487 | 10.847 | 15.280 | 11.919 | 8.008  |
| 9 | 0.4865 | 22.343 | 20.067 | 28.183 | 11.910 | 12.472 |
| 9 | 0.4875 | 16.669 | 19.323 | 17.558 | 15.380 | 15.474 |
| 9 | 0.4885 | 7.504  | 7.787  | 8.975  | 11.972 | 12.218 |
| 9 | 0.4895 | 4.991  | 10.218 | 5.721  | 7.591  | 8.185  |
| 9 | 0.4905 | 5.001  | 10.223 | 5.732  | 7.594  | 8.196  |
| 9 | 0.4915 | 5.540  | 10.622 | 5.316  | 16.139 | 5.498  |
| 9 | 0.4925 | 14.159 | 16.591 | 19.872 | 16.690 | 22.409 |
| 9 | 0.4935 | 18.517 | 20.818 | 25.306 | 22.048 | 18.690 |
| 9 | 0.4945 | 18.505 | 20.811 | 25.311 | 22.049 | 18.701 |
| 9 | 0.4955 | 20.051 | 14.478 | 16.569 | 25.951 | 17.321 |
| 9 | 0.4965 | 19.089 | 20.934 | 16.484 | 28.927 | 17.245 |
| 9 | 0.4975 | 10.209 | 13.198 | 16.701 | 17.481 | 11.358 |
| 9 | 0.4985 | 18.542 | 20.212 | 24.590 | 17.831 | 15.333 |
| 9 | 0.4995 | 22.672 | 16.389 | 24.843 | 20.283 | 13.836 |
| 9 | 0.5005 | 16.520 | 11.069 | 17.327 | 6.175  | 22.974 |
| 9 | 0.5015 | 10.343 | 11.243 | 13.058 | 15.978 | 19.623 |
| 9 | 0.5025 | 16.278 | 15.415 | 18.938 | 11.122 | 20.110 |
| 9 | 0.5035 | 16.253 | 15.423 | 19.076 | 11.165 | 20.052 |
| 9 | 0.5045 | 8.814  | 8.510  | 14.550 | 11.421 | 19.678 |
| 9 | 0.5055 | 10.944 | 5.140  | 11.467 | 8.982  | 19.680 |
| 9 | 0.5065 | 2.353  | 5.338  | 3.351  | 7.771  | 5.965  |
| 9 | 0.5075 | 10.273 | 16.049 | 11.764 | 13.422 | 8.606  |
| 9 | 0.5085 | 18.073 | 24.442 | 22.463 | 16.706 | 15.674 |
| 9 | 0.5095 | 16.535 | 17.934 | 19.109 | 6.613  | 13.232 |
| 9 | 0.5105 | 15.019 | 14.177 | 19.364 | 7.428  | 14.628 |
| 9 | 0.5115 | 12.052 | 12.445 | 13.275 | 9.943  | 19.532 |
| 9 | 0.5125 | 15.579 | 20.103 | 18.913 | 16.458 | 27.501 |
| 9 | 0.5135 | 20.172 | 14.151 | 13.298 | 6.544  | 24.622 |
| 9 | 0.5145 | 8.317  | 13.692 | 8.749  | 9.459  | 18.302 |
| 9 | 0.5155 | 9.395  | 10.523 | 10.378 | 10.330 | 8.395  |
| 9 | 0.5165 | 10.003 | 16.993 | 16.401 | 9.302  | 13.447 |
| 9 | 0.5175 | 8.912  | 5.291  | 6.633  | 14.291 | 14.531 |
| 9 | 0.5185 | 19.117 | 14.922 | 12.128 | 15.382 | 14.247 |
| 9 | 0.5195 | 14.112 | 8.805  | 15.389 | 7.810  | 10.198 |
| 9 | 0.5205 | 13.530 | 13.045 | 14.532 | 13.243 | 7.775  |
| 9 | 0.5215 | 10.309 | 10.917 | 12.819 | 12.987 | 12.343 |
| 9 | 0.5225 | 8.631  | 13.410 | 16.592 | 10.024 | 13.774 |
| 9 | 0.5235 | 4.604  | 14.327 | 11.245 | 15.110 | 17.243 |
| 9 | 0.5245 | 4.602  | 7.937  | 4.343  | 10.136 | 16.232 |
| 9 | 0.5255 | 7.338  | 6.878  | 5.590  | 9.738  | 15.391 |
| 9 | 0.5265 | 16.002 | 18.164 | 13.648 | 11.849 | 20.456 |
| 9 | 0.5275 | 28.760 | 28.805 | 24.996 | 6.014  | 18.415 |
| 9 | 0.5285 | 7.023  | 7.027  | 4.682  | 4.781  | 16.605 |
| 9 | 0.5295 | 6.702  | 10.368 | 14.445 | 10.747 | 16.643 |
| 9 | 0.5305 | 7.903  | 10.443 | 11.546 | 7.125  | 11.768 |
| 9 | 0.5315 | 14.893 | 9.767  | 13.011 | 2.384  | 8.111  |
| 9 | 0.5325 | 13.021 | 11.702 | 13.894 | 6.456  | 22.270 |
| 9 | 0.5335 | 11.852 | 11.737 | 12.582 | 6.464  | 11.404 |
| 9 | 0.5345 | 18.867 | 26.359 | 24.214 | 12.940 | 19.897 |

|   |        |        |        |        |        |        |
|---|--------|--------|--------|--------|--------|--------|
| 9 | 0.5355 | 17.991 | 16.996 | 22.530 | 8.006  | 13.494 |
| 9 | 0.5365 | 14.069 | 14.345 | 13.220 | 9.309  | 17.537 |
| 9 | 0.5375 | 18.346 | 14.351 | 13.124 | 5.374  | 12.567 |
| 9 | 0.5385 | 9.857  | 10.123 | 8.360  | 9.778  | 11.711 |
| 9 | 0.5395 | 13.803 | 15.770 | 16.424 | 10.218 | 9.234  |
| 9 | 0.5405 | 5.797  | 9.283  | 14.812 | 10.884 | 15.487 |
| 9 | 0.5415 | 18.135 | 18.554 | 14.674 | 5.564  | 16.719 |
| 9 | 0.5425 | 11.073 | 12.090 | 12.306 | 6.891  | 17.630 |
| 9 | 0.5435 | 15.623 | 20.124 | 20.116 | 7.189  | 14.603 |
| 9 | 0.5445 | 8.114  | 11.526 | 4.882  | 9.711  | 13.156 |
| 9 | 0.5455 | 16.117 | 11.320 | 15.320 | 13.258 | 20.628 |
| 9 | 0.5465 | 9.390  | 12.408 | 10.137 | 6.590  | 22.088 |
| 9 | 0.5475 | 12.453 | 10.859 | 13.184 | 4.385  | 11.841 |
| 9 | 0.5485 | 14.826 | 10.592 | 12.649 | 7.613  | 16.042 |
| 9 | 0.5495 | 13.578 | 12.790 | 12.675 | 5.065  | 11.257 |
| 9 | 0.5505 | 10.150 | 10.893 | 11.255 | 5.767  | 10.857 |
| 9 | 0.5515 | 17.801 | 24.626 | 13.480 | 13.524 | 14.017 |
| 9 | 0.5525 | 7.505  | 12.158 | 12.558 | 7.512  | 11.744 |
| 9 | 0.5535 | 11.253 | 19.927 | 16.751 | 12.204 | 13.436 |
| 9 | 0.5545 | 12.776 | 16.836 | 13.732 | 7.192  | 13.358 |
| 9 | 0.5555 | 7.774  | 12.915 | 9.654  | 22.902 | 19.782 |
| 9 | 0.5565 | 13.849 | 17.881 | 17.104 | 18.618 | 30.886 |
| 9 | 0.5575 | 9.342  | 15.333 | 13.680 | 14.440 | 21.713 |
| 9 | 0.5585 | 16.535 | 22.380 | 22.956 | 11.791 | 17.968 |
| 9 | 0.5595 | 5.780  | 8.507  | 11.775 | 16.611 | 20.183 |
| 9 | 0.5605 | 10.509 | 14.811 | 15.010 | 10.855 | 18.369 |
| 9 | 0.5615 | 13.893 | 12.282 | 10.758 | 16.144 | 18.137 |
| 9 | 0.5625 | 20.303 | 10.284 | 9.519  | 18.212 | 20.990 |
| 9 | 0.5635 | 11.746 | 19.862 | 15.130 | 13.780 | 25.205 |
| 9 | 0.5645 | 12.929 | 14.149 | 17.473 | 25.264 | 18.427 |
| 9 | 0.5655 | 7.342  | 9.801  | 6.716  | 9.731  | 18.649 |
| 9 | 0.5665 | 9.350  | 10.834 | 5.573  | 16.547 | 4.680  |
| 9 | 0.5675 | 18.546 | 26.256 | 20.116 | 22.291 | 18.596 |
| 9 | 0.5685 | 15.014 | 19.648 | 20.313 | 9.959  | 10.499 |
| 9 | 0.5695 | 14.963 | 19.585 | 20.183 | 10.213 | 10.481 |
| 9 | 0.5705 | 10.209 | 11.802 | 12.071 | 17.117 | 11.355 |
| 9 | 0.5715 | 13.470 | 21.701 | 16.319 | 20.358 | 16.001 |
| 9 | 0.5725 | 11.879 | 18.008 | 15.819 | 7.206  | 22.208 |
| 9 | 0.5735 | 15.394 | 14.696 | 17.808 | 7.839  | 19.471 |
| 9 | 0.5745 | 7.249  | 15.606 | 9.159  | 14.960 | 19.299 |
| 9 | 0.5755 | 7.247  | 12.295 | 9.371  | 14.713 | 15.218 |
| 9 | 0.5765 | 5.717  | 7.338  | 11.798 | 9.795  | 17.157 |
| 9 | 0.5775 | 12.396 | 18.429 | 15.698 | 20.068 | 18.418 |
| 9 | 0.5785 | 6.050  | 5.980  | 6.212  | 12.405 | 14.099 |
| 9 | 0.5795 | 10.253 | 9.950  | 10.029 | 10.417 | 9.433  |
| 9 | 0.5805 | 14.766 | 17.000 | 12.450 | 10.243 | 21.054 |
| 9 | 0.5815 | 5.875  | 5.368  | 2.582  | 3.960  | 19.391 |
| 9 | 0.5825 | 7.387  | 11.130 | 9.340  | 12.628 | 18.382 |
| 9 | 0.5835 | 9.529  | 13.660 | 14.426 | 11.443 | 16.153 |
| 9 | 0.5845 | 9.515  | 13.670 | 14.417 | 11.578 | 16.138 |

|   |        |        |        |        |        |        |
|---|--------|--------|--------|--------|--------|--------|
| 9 | 0.5855 | 7.318  | 8.004  | 8.966  | 15.049 | 11.653 |
| 9 | 0.5865 | 10.997 | 16.102 | 14.245 | 19.595 | 21.518 |
| 9 | 0.5875 | 9.528  | 15.831 | 10.001 | 39.353 | 21.189 |
| 9 | 0.5885 | 5.278  | 16.628 | 9.356  | 19.270 | 15.461 |
| 9 | 0.5895 | 9.162  | 17.384 | 11.104 | 16.824 | 11.651 |
| 9 | 0.5905 | 4.624  | 8.902  | 5.830  | 17.813 | 21.239 |
| 9 | 0.5915 | 11.801 | 7.268  | 6.897  | 13.910 | 29.526 |
| 9 | 0.5925 | 9.951  | 13.108 | 15.717 | 6.879  | 17.277 |
| 9 | 0.5935 | 13.079 | 17.308 | 9.185  | 17.924 | 12.888 |
| 9 | 0.5945 | 10.615 | 16.493 | 7.870  | 21.016 | 18.815 |
| 9 | 0.5955 | 2.616  | 9.311  | 6.928  | 17.823 | 23.256 |
| 9 | 0.5965 | 3.830  | 9.085  | 2.870  | 16.054 | 8.897  |
| 9 | 0.5975 | 8.429  | 13.774 | 7.221  | 14.456 | 9.621  |
| 9 | 0.5985 | 16.444 | 23.910 | 21.955 | 20.789 | 14.125 |
| 9 | 0.5995 | 13.251 | 14.457 | 17.327 | 7.892  | 13.269 |
| 9 | 0.6005 | 6.129  | 6.584  | 10.016 | 8.097  | 6.807  |
| 9 | 0.6015 | 9.035  | 12.773 | 12.340 | 17.351 | 19.078 |
| 9 | 0.6025 | 2.541  | 5.376  | 4.623  | 16.386 | 10.105 |
| 9 | 0.6035 | 7.638  | 11.636 | 5.893  | 9.533  | 9.761  |
| 9 | 0.6045 | 3.903  | 3.499  | 4.314  | 17.218 | 16.226 |
| 9 | 0.6055 | 2.623  | 3.484  | 2.094  | 13.528 | 13.607 |
| 9 | 0.6065 | 13.734 | 10.886 | 9.999  | 9.510  | 25.398 |
| 9 | 0.6075 | 9.638  | 10.278 | 8.652  | 8.970  | 25.631 |
| 9 | 0.6085 | 7.787  | 15.240 | 12.447 | 16.787 | 7.903  |
| 9 | 0.6095 | 4.573  | 10.999 | 5.767  | 17.407 | 9.837  |
| 9 | 0.6105 | 13.275 | 16.158 | 11.844 | 18.427 | 22.603 |
| 9 | 0.6115 | 5.928  | 6.736  | 4.696  | 13.093 | 13.955 |
| 9 | 0.6125 | 6.897  | 11.435 | 10.970 | 13.093 | 17.058 |
| 9 | 0.6135 | 11.524 | 18.740 | 15.396 | 9.751  | 10.092 |
| 9 | 0.6145 | 9.460  | 12.044 | 8.359  | 13.534 | 13.430 |
| 9 | 0.6155 | 6.789  | 13.165 | 11.951 | 14.754 | 10.593 |
| 9 | 0.6165 | 7.131  | 11.771 | 10.547 | 14.690 | 6.844  |
| 9 | 0.6175 | 4.654  | 4.946  | 9.483  | 9.622  | 10.930 |
| 9 | 0.6185 | 6.006  | 9.459  | 6.146  | 7.724  | 9.097  |
| 9 | 0.6195 | 10.473 | 15.723 | 9.180  | 15.652 | 17.304 |
| 9 | 0.6205 | 6.550  | 6.127  | 6.219  | 10.157 | 22.501 |
| 9 | 0.6215 | 3.899  | 4.573  | 5.001  | 9.303  | 14.939 |
| 9 | 0.6225 | 6.555  | 10.723 | 7.206  | 9.413  | 8.988  |
| 9 | 0.6235 | 9.283  | 23.013 | 13.505 | 16.005 | 12.784 |
| 9 | 0.6245 | 14.896 | 17.975 | 13.627 | 12.491 | 9.352  |
| 9 | 0.6255 | 9.149  | 11.911 | 10.543 | 16.592 | 4.609  |
| 9 | 0.6265 | 9.336  | 10.221 | 8.874  | 20.664 | 17.068 |
| 9 | 0.6275 | 8.445  | 9.818  | 9.112  | 11.439 | 10.336 |
| 9 | 0.6285 | 6.529  | 13.758 | 6.878  | 14.695 | 14.958 |
| 9 | 0.6295 | 8.351  | 14.433 | 6.944  | 13.758 | 21.004 |
| 9 | 0.6305 | 2.388  | 6.497  | 3.279  | 19.052 | 14.316 |
| 9 | 0.6315 | 3.283  | 6.166  | 2.029  | 8.378  | 13.870 |
| 9 | 0.6325 | 6.049  | 12.102 | 11.131 | 7.889  | 9.305  |
| 9 | 0.6335 | 11.796 | 19.931 | 18.338 | 22.308 | 12.642 |
| 9 | 0.6345 | 11.763 | 19.924 | 18.348 | 22.322 | 12.714 |

|   |        |        |        |        |        |        |
|---|--------|--------|--------|--------|--------|--------|
| 9 | 0.6355 | 5.193  | 8.814  | 9.133  | 6.423  | 6.592  |
| 9 | 0.6365 | 2.422  | 6.966  | 4.530  | 11.401 | 7.977  |
| 9 | 0.6375 | 9.564  | 13.412 | 9.541  | 18.840 | 13.721 |
| 9 | 0.6385 | 5.026  | 7.058  | 4.682  | 8.012  | 6.533  |
| 9 | 0.6395 | 5.731  | 9.580  | 7.689  | 10.528 | 18.122 |
| 9 | 0.6405 | 14.646 | 20.270 | 22.865 | 11.514 | 7.506  |
| 9 | 0.6415 | 11.857 | 21.403 | 15.910 | 26.411 | 14.279 |
| 9 | 0.6425 | 8.789  | 13.145 | 6.513  | 17.449 | 14.384 |
| 9 | 0.6435 | 17.096 | 17.511 | 12.050 | 16.242 | 16.201 |
| 9 | 0.6445 | 4.862  | 1.209  | 6.388  | 16.278 | 13.552 |
| 9 | 0.6455 | 9.786  | 20.806 | 15.012 | 13.785 | 10.784 |
| 9 | 0.6465 | 9.345  | 17.070 | 11.705 | 13.737 | 16.634 |
| 9 | 0.6475 | 14.197 | 14.885 | 12.451 | 17.290 | 24.342 |
| 9 | 0.6485 | 10.866 | 7.202  | 7.967  | 16.323 | 15.476 |
| 9 | 0.6495 | 12.787 | 5.861  | 7.045  | 5.729  | 15.694 |
| 9 | 0.6505 | 12.788 | 5.873  | 7.048  | 5.764  | 15.663 |
| 9 | 0.6515 | 6.894  | 4.129  | 9.290  | 8.624  | 13.176 |
| 9 | 0.6525 | 10.408 | 11.377 | 8.155  | 20.130 | 12.201 |
| 9 | 0.6535 | 16.426 | 26.466 | 17.187 | 18.391 | 21.986 |
| 9 | 0.6545 | 14.876 | 19.644 | 16.530 | 12.783 | 15.594 |
| 9 | 0.6555 | 11.521 | 9.863  | 7.999  | 20.970 | 15.678 |
| 9 | 0.6565 | 12.748 | 10.271 | 11.721 | 11.186 | 17.784 |
| 9 | 0.6575 | 8.300  | 3.578  | 5.570  | 12.001 | 15.268 |
| 9 | 0.6585 | 11.710 | 8.079  | 10.427 | 8.836  | 15.240 |
| 9 | 0.6595 | 13.432 | 11.486 | 9.330  | 10.042 | 12.449 |
| 9 | 0.6605 | 7.347  | 10.521 | 7.835  | 11.370 | 9.388  |
| 9 | 0.6615 | 4.819  | 5.000  | 6.374  | 13.430 | 8.512  |
| 9 | 0.6625 | 14.195 | 15.312 | 10.114 | 19.373 | 25.512 |
| 9 | 0.6635 | 6.503  | 4.517  | 6.186  | 20.528 | 19.586 |
| 9 | 0.6645 | 11.073 | 8.761  | 9.088  | 24.929 | 16.467 |
| 9 | 0.6655 | 6.922  | 20.594 | 7.806  | 29.117 | 13.041 |
| 9 | 0.6665 | 12.003 | 16.807 | 12.181 | 30.261 | 23.279 |
| 9 | 0.6675 | 10.956 | 17.067 | 15.921 | 21.907 | 6.310  |
| 9 | 0.6685 | 6.923  | 8.416  | 8.702  | 23.426 | 9.864  |
| 9 | 0.6695 | 3.725  | 3.754  | 3.704  | 12.281 | 7.089  |
| 9 | 0.6705 | 13.336 | 14.284 | 14.677 | 8.986  | 19.197 |
| 9 | 0.6715 | 16.517 | 15.795 | 10.855 | 21.551 | 26.133 |
| 9 | 0.6725 | 9.761  | 15.260 | 12.305 | 28.230 | 23.146 |
| 9 | 0.6735 | 11.013 | 11.894 | 12.471 | 16.721 | 27.640 |
| 9 | 0.6745 | 11.585 | 9.659  | 11.752 | 18.626 | 34.717 |
| 9 | 0.6755 | 11.382 | 9.338  | 6.803  | 21.368 | 18.440 |
| 9 | 0.6765 | 14.607 | 15.100 | 8.083  | 17.264 | 26.775 |
| 9 | 0.6775 | 10.967 | 7.860  | 8.312  | 21.559 | 27.017 |
| 9 | 0.6785 | 7.932  | 9.899  | 6.521  | 21.278 | 18.160 |
| 9 | 0.6795 | 10.158 | 15.586 | 6.597  | 25.851 | 19.564 |
| 9 | 0.6805 | 8.194  | 13.628 | 5.086  | 32.141 | 19.608 |
| 9 | 0.6815 | 18.208 | 15.295 | 11.321 | 8.411  | 21.111 |
| 9 | 0.6825 | 14.280 | 28.140 | 15.262 | 20.079 | 24.666 |
| 9 | 0.6835 | 17.647 | 23.019 | 20.146 | 11.732 | 25.909 |
| 9 | 0.6845 | 14.078 | 16.598 | 11.141 | 16.192 | 28.219 |

|   |        |        |        |        |        |        |
|---|--------|--------|--------|--------|--------|--------|
| 9 | 0.6855 | 26.715 | 25.147 | 22.713 | 16.511 | 36.002 |
| 9 | 0.6865 | 10.784 | 9.850  | 10.242 | 16.196 | 12.446 |
| 9 | 0.6875 | 14.065 | 12.574 | 11.479 | 21.883 | 24.946 |
| 9 | 0.6885 | 16.292 | 19.079 | 15.164 | 12.835 | 29.819 |
| 9 | 0.6895 | 16.126 | 19.415 | 15.211 | 8.618  | 20.885 |
| 9 | 0.6905 | 19.413 | 18.862 | 18.001 | 19.121 | 44.850 |
| 9 | 0.6915 | 14.096 | 18.082 | 14.515 | 6.859  | 15.545 |
| 9 | 0.6925 | 12.101 | 11.986 | 11.809 | 13.332 | 23.678 |
| 9 | 0.6935 | 16.108 | 17.030 | 17.564 | 9.505  | 25.147 |
| 9 | 0.6945 | 12.488 | 14.851 | 7.519  | 15.405 | 24.907 |
| 9 | 0.6955 | 4.972  | 7.055  | 5.130  | 12.966 | 20.627 |
| 9 | 0.6965 | 27.262 | 29.545 | 22.883 | 18.925 | 36.152 |
| 9 | 0.6975 | 23.757 | 20.810 | 20.798 | 13.954 | 26.038 |
| 9 | 0.6985 | 22.581 | 19.616 | 21.261 | 23.980 | 36.610 |
| 9 | 0.6995 | 8.292  | 14.607 | 10.953 | 23.006 | 20.577 |
| 9 | 0.7005 | 11.511 | 13.069 | 10.059 | 18.295 | 16.833 |
| 9 | 0.7015 | 15.528 | 21.534 | 14.815 | 23.811 | 35.367 |
| 9 | 0.7025 | 16.522 | 17.984 | 14.095 | 14.613 | 22.806 |
| 9 | 0.7035 | 16.503 | 21.168 | 9.802  | 20.001 | 32.913 |
| 9 | 0.7045 | 16.426 | 27.145 | 20.662 | 17.243 | 17.862 |
| 9 | 0.7055 | 11.255 | 13.795 | 8.585  | 12.927 | 32.172 |
| 9 | 0.7065 | 13.866 | 13.565 | 9.634  | 20.050 | 31.231 |
| 9 | 0.7075 | 8.673  | 7.731  | 8.966  | 13.998 | 26.958 |
| 9 | 0.7085 | 8.854  | 13.722 | 12.534 | 15.014 | 22.103 |
| 9 | 0.7095 | 14.343 | 15.148 | 11.429 | 12.992 | 22.750 |
| 9 | 0.7105 | 11.575 | 14.518 | 7.607  | 14.076 | 22.154 |
| 9 | 0.7115 | 8.082  | 9.199  | 7.463  | 11.818 | 20.215 |
| 9 | 0.7125 | 13.178 | 14.343 | 11.425 | 13.415 | 24.746 |
| 9 | 0.7135 | 10.239 | 13.281 | 11.541 | 9.999  | 17.856 |
| 9 | 0.7145 | 10.348 | 8.852  | 9.123  | 7.495  | 14.111 |
| 9 | 0.7155 | 10.049 | 7.657  | 8.910  | 9.567  | 12.594 |
| 9 | 0.7165 | 15.265 | 16.226 | 15.593 | 15.929 | 25.855 |
| 9 | 0.7175 | 13.158 | 11.832 | 8.706  | 20.860 | 22.474 |
| 9 | 0.7185 | 11.170 | 13.642 | 13.472 | 15.844 | 20.366 |
| 9 | 0.7195 | 14.930 | 14.693 | 12.175 | 21.095 | 18.422 |
| 9 | 0.7205 | 13.166 | 16.473 | 13.638 | 16.879 | 22.376 |
| 9 | 0.7215 | 13.450 | 9.629  | 14.322 | 21.351 | 30.689 |
| 9 | 0.7225 | 18.739 | 17.800 | 18.789 | 17.056 | 20.563 |
| 9 | 0.7235 | 11.974 | 18.575 | 13.073 | 14.414 | 12.976 |
| 9 | 0.7245 | 11.944 | 18.607 | 13.061 | 14.385 | 12.986 |
| 9 | 0.7255 | 13.549 | 16.447 | 16.286 | 17.310 | 23.337 |
| 9 | 0.7265 | 13.389 | 16.084 | 15.855 | 17.282 | 23.333 |
| 9 | 0.7275 | 18.860 | 20.528 | 13.016 | 17.249 | 20.813 |
| 9 | 0.7285 | 16.140 | 20.422 | 12.933 | 13.578 | 23.251 |
| 9 | 0.7295 | 11.590 | 20.250 | 15.117 | 16.230 | 22.496 |
| 9 | 0.7305 | 11.589 | 20.251 | 15.118 | 16.234 | 22.500 |
| 9 | 0.7315 | 8.671  | 16.719 | 10.960 | 9.551  | 12.847 |
| 9 | 0.7325 | 9.320  | 12.889 | 8.930  | 10.628 | 17.660 |
| 9 | 0.7335 | 15.370 | 25.285 | 10.025 | 15.864 | 15.173 |
| 9 | 0.7345 | 27.300 | 44.526 | 22.112 | 31.342 | 24.160 |

|   |        |        |        |        |        |        |
|---|--------|--------|--------|--------|--------|--------|
| 9 | 0.7355 | 10.294 | 18.706 | 11.458 | 24.794 | 26.821 |
| 9 | 0.7365 | 6.756  | 20.321 | 9.293  | 22.573 | 18.744 |
| 9 | 0.7375 | 7.157  | 14.370 | 6.869  | 19.597 | 21.021 |
| 9 | 0.7385 | 24.911 | 27.390 | 19.686 | 15.949 | 19.842 |
| 9 | 0.7395 | 16.280 | 28.162 | 15.359 | 14.863 | 16.311 |
| 9 | 0.7405 | 18.219 | 19.650 | 15.305 | 11.875 | 15.528 |
| 9 | 0.7415 | 7.434  | 11.516 | 7.913  | 17.781 | 9.101  |
| 9 | 0.7425 | 22.837 | 24.354 | 19.519 | 7.068  | 21.003 |
| 9 | 0.7435 | 11.998 | 12.620 | 9.773  | 18.811 | 36.355 |
| 9 | 0.7445 | 5.951  | 7.832  | 5.955  | 10.858 | 32.266 |
| 9 | 0.7455 | 8.558  | 25.728 | 12.114 | 24.816 | 16.276 |
| 9 | 0.7465 | 9.414  | 15.162 | 12.156 | 9.090  | 11.375 |
| 9 | 0.7475 | 10.360 | 12.546 | 11.651 | 5.101  | 12.497 |
| 9 | 0.7485 | 10.986 | 14.487 | 12.176 | 23.911 | 34.269 |
| 9 | 0.7495 | 13.160 | 20.509 | 19.604 | 13.188 | 21.697 |
| 9 | 0.7505 | 12.764 | 20.487 | 19.781 | 19.200 | 23.974 |
| 9 | 0.7515 | 10.665 | 17.467 | 16.458 | 15.036 | 13.954 |
| 9 | 0.7525 | 10.042 | 18.591 | 15.652 | 15.921 | 23.303 |
| 9 | 0.7535 | 8.025  | 15.469 | 14.736 | 16.289 | 26.241 |
| 9 | 0.7545 | 10.088 | 15.626 | 15.806 | 21.066 | 19.910 |
| 9 | 0.7555 | 16.501 | 29.556 | 17.023 | 27.141 | 23.495 |
| 9 | 0.7565 | 13.745 | 21.161 | 10.882 | 17.901 | 20.888 |
| 9 | 0.7575 | 16.403 | 24.662 | 10.644 | 28.623 | 27.110 |
| 9 | 0.7585 | 12.083 | 14.078 | 7.691  | 20.160 | 11.790 |
| 9 | 0.7595 | 29.240 | 40.828 | 35.880 | 22.949 | 13.884 |
| 9 | 0.7605 | 30.018 | 28.857 | 33.373 | 15.982 | 18.485 |
| 9 | 0.7615 | 2.206  | 4.351  | 6.985  | 18.676 | 12.501 |
| 9 | 0.7625 | 8.410  | 16.874 | 11.988 | 17.402 | 13.367 |
| 9 | 0.7635 | 13.097 | 22.589 | 17.071 | 19.420 | 7.491  |
| 9 | 0.7645 | 15.835 | 25.068 | 15.939 | 15.154 | 10.458 |
| 9 | 0.7655 | 14.428 | 19.200 | 11.900 | 12.079 | 27.321 |
| 9 | 0.7665 | 6.633  | 20.493 | 7.713  | 24.086 | 14.699 |
| 9 | 0.7675 | 4.726  | 19.143 | 4.942  | 36.586 | 20.221 |
| 9 | 0.7685 | 10.199 | 19.110 | 11.944 | 13.470 | 29.245 |
| 9 | 0.7695 | 12.208 | 16.799 | 13.321 | 16.032 | 33.086 |
| 9 | 0.7705 | 11.589 | 11.088 | 10.331 | 14.278 | 25.836 |
| 9 | 0.7715 | 11.562 | 11.103 | 10.327 | 14.268 | 25.825 |
| 9 | 0.7725 | 10.210 | 17.827 | 11.672 | 16.000 | 7.905  |
| 9 | 0.7735 | 23.483 | 37.022 | 27.876 | 11.353 | 15.753 |
| 9 | 0.7745 | 16.357 | 21.345 | 18.806 | 10.425 | 34.058 |
| 9 | 0.7755 | 17.852 | 29.441 | 17.387 | 27.650 | 21.781 |
| 9 | 0.7765 | 22.763 | 21.437 | 14.820 | 17.452 | 11.950 |
| 9 | 0.7775 | 12.514 | 15.925 | 7.229  | 17.917 | 16.509 |
| 9 | 0.7785 | 10.541 | 14.901 | 4.368  | 17.504 | 26.775 |
| 9 | 0.7795 | 7.410  | 7.217  | 5.605  | 16.089 | 12.638 |
| 9 | 0.7805 | 11.237 | 15.750 | 11.792 | 19.628 | 21.999 |
| 9 | 0.7815 | 4.044  | 16.794 | 6.040  | 19.912 | 20.997 |
| 9 | 0.7825 | 7.531  | 17.305 | 7.120  | 15.280 | 15.048 |
| 9 | 0.7835 | 15.024 | 25.286 | 14.433 | 18.932 | 17.767 |
| 9 | 0.7845 | 13.555 | 8.863  | 9.044  | 14.672 | 12.118 |

|   |        |        |        |        |        |        |
|---|--------|--------|--------|--------|--------|--------|
| 9 | 0.7855 | 15.185 | 23.386 | 16.676 | 17.864 | 12.477 |
| 9 | 0.7865 | 10.904 | 16.593 | 9.304  | 17.428 | 13.202 |
| 9 | 0.7875 | 18.127 | 27.691 | 18.843 | 18.475 | 14.972 |
| 9 | 0.7885 | 7.884  | 7.677  | 6.630  | 11.478 | 23.978 |
| 9 | 0.7895 | 14.810 | 16.597 | 19.506 | 13.128 | 19.103 |
| 9 | 0.7905 | 16.938 | 17.548 | 14.685 | 18.288 | 17.504 |
| 9 | 0.7915 | 11.348 | 11.491 | 8.987  | 9.419  | 13.999 |
| 9 | 0.7925 | 8.403  | 10.202 | 4.249  | 13.473 | 14.522 |
| 9 | 0.7935 | 11.113 | 14.224 | 9.900  | 23.763 | 13.576 |
| 9 | 0.7945 | 12.478 | 20.413 | 18.782 | 27.505 | 15.006 |
| 9 | 0.7955 | 10.242 | 8.933  | 11.331 | 13.671 | 11.172 |
| 9 | 0.7965 | 11.963 | 14.095 | 14.355 | 13.075 | 17.927 |
| 9 | 0.7975 | 3.283  | 8.410  | 3.848  | 19.571 | 11.615 |
| 9 | 0.7985 | 7.752  | 9.383  | 8.403  | 16.002 | 13.709 |
| 9 | 0.7995 | 6.159  | 9.307  | 5.908  | 20.493 | 7.550  |
| 9 | 0.8005 | 10.013 | 19.520 | 15.148 | 15.346 | 13.662 |
| 9 | 0.8015 | 16.409 | 20.948 | 18.283 | 21.570 | 19.553 |
| 9 | 0.8025 | 12.793 | 13.867 | 12.805 | 25.793 | 21.023 |
| 9 | 0.8035 | 19.461 | 23.080 | 21.384 | 19.049 | 10.532 |
| 9 | 0.8045 | 14.528 | 21.982 | 19.092 | 24.602 | 17.465 |
| 9 | 0.8055 | 10.485 | 21.738 | 13.189 | 20.550 | 18.570 |
| 9 | 0.8065 | 10.281 | 13.021 | 9.780  | 11.599 | 14.358 |
| 9 | 0.8075 | 17.331 | 10.040 | 13.794 | 7.524  | 20.105 |
| 9 | 0.8085 | 11.450 | 7.311  | 10.602 | 15.802 | 18.949 |
| 9 | 0.8095 | 10.927 | 9.923  | 12.231 | 6.873  | 10.570 |
| 9 | 0.8105 | 14.920 | 17.698 | 12.252 | 8.215  | 8.027  |
| 9 | 0.8115 | 9.760  | 16.889 | 11.634 | 8.167  | 12.817 |
| 9 | 0.8125 | 11.726 | 10.389 | 15.787 | 7.828  | 14.569 |
| 9 | 0.8135 | 13.910 | 14.724 | 14.176 | 7.756  | 17.051 |
| 9 | 0.8145 | 4.036  | 8.592  | 4.664  | 7.766  | 9.442  |
| 9 | 0.8155 | 8.570  | 20.384 | 16.365 | 16.973 | 18.039 |
| 9 | 0.8165 | 16.559 | 25.260 | 19.911 | 18.616 | 18.255 |
| 9 | 0.8175 | 11.617 | 13.170 | 12.749 | 7.511  | 11.308 |
| 9 | 0.8185 | 21.078 | 18.243 | 24.065 | 11.675 | 19.489 |
| 9 | 0.8195 | 10.980 | 17.573 | 12.004 | 8.159  | 12.467 |
| 9 | 0.8205 | 12.721 | 17.012 | 16.133 | 11.590 | 11.909 |
| 9 | 0.8215 | 12.292 | 14.387 | 13.684 | 7.549  | 10.047 |
| 9 | 0.8225 | 16.107 | 21.594 | 19.519 | 9.005  | 13.141 |
| 9 | 0.8235 | 15.507 | 23.660 | 17.737 | 11.793 | 10.733 |
| 9 | 0.8245 | 10.969 | 22.103 | 16.515 | 8.721  | 15.724 |
| 9 | 0.8255 | 9.094  | 12.549 | 17.383 | 12.967 | 11.753 |
| 9 | 0.8265 | 15.662 | 17.270 | 23.348 | 4.962  | 12.664 |
| 9 | 0.8275 | 14.863 | 17.861 | 17.042 | 26.409 | 15.144 |
| 9 | 0.8285 | 16.005 | 14.143 | 14.195 | 14.208 | 8.272  |
| 9 | 0.8295 | 12.036 | 8.511  | 10.810 | 11.516 | 10.269 |
| 9 | 0.8305 | 17.191 | 10.021 | 8.940  | 12.483 | 9.308  |
| 9 | 0.8315 | 25.282 | 22.278 | 26.245 | 13.059 | 14.935 |
| 9 | 0.8325 | 8.548  | 9.612  | 12.439 | 15.704 | 8.741  |
| 9 | 0.8335 | 11.645 | 9.185  | 12.194 | 13.988 | 5.436  |
| 9 | 0.8345 | 10.431 | 9.723  | 14.677 | 14.857 | 13.341 |



|   |        |        |        |        |        |        |
|---|--------|--------|--------|--------|--------|--------|
| 9 | 0.8355 | 10.595 | 12.039 | 13.091 | 11.397 | 6.575  |
| 9 | 0.8365 | 26.508 | 15.641 | 18.859 | 27.399 | 13.497 |
| 9 | 0.8375 | 25.824 | 19.395 | 27.174 | 17.834 | 8.310  |
| 9 | 0.8385 | 13.160 | 14.551 | 12.424 | 12.820 | 6.844  |
| 9 | 0.8395 | 12.116 | 12.610 | 14.716 | 9.196  | 9.891  |
| 9 | 0.8405 | 16.018 | 17.157 | 16.865 | 14.189 | 18.423 |
| 9 | 0.8415 | 13.657 | 15.708 | 16.945 | 15.232 | 19.191 |
| 9 | 0.8425 | 11.106 | 20.808 | 17.795 | 17.420 | 10.421 |
| 9 | 0.8435 | 10.040 | 9.725  | 9.867  | 13.561 | 9.144  |
| 9 | 0.8445 | 10.843 | 11.523 | 11.665 | 13.882 | 3.412  |
| 9 | 0.8455 | 5.947  | 11.514 | 6.206  | 12.696 | 7.014  |
| 9 | 0.8465 | 6.041  | 11.608 | 6.308  | 12.733 | 7.039  |
| 9 | 0.8475 | 15.395 | 13.031 | 12.848 | 10.384 | 11.676 |
| 9 | 0.8485 | 10.857 | 11.501 | 15.109 | 7.896  | 7.471  |
| 9 | 0.8495 | 18.424 | 24.201 | 24.014 | 17.865 | 11.639 |
| 9 | 0.8505 | 18.288 | 24.231 | 24.000 | 17.907 | 11.689 |
| 9 | 0.8515 | 17.051 | 19.757 | 22.609 | 10.610 | 8.194  |
| 9 | 0.8525 | 13.689 | 21.870 | 20.349 | 15.368 | 8.313  |
| 9 | 0.8535 | 21.423 | 25.755 | 22.641 | 11.713 | 5.299  |
| 9 | 0.8545 | 18.442 | 27.866 | 21.176 | 17.355 | 6.497  |
| 9 | 0.8555 | 12.125 | 20.313 | 9.756  | 14.485 | 8.316  |
| 9 | 0.8565 | 14.507 | 15.479 | 20.008 | 12.837 | 17.901 |
| 9 | 0.8575 | 7.888  | 11.780 | 10.680 | 17.063 | 13.530 |
| 9 | 0.8585 | 1.835  | 5.311  | 1.373  | 15.722 | 9.231  |
| 9 | 0.8595 | 1.836  | 5.311  | 1.373  | 15.722 | 9.225  |
| 9 | 0.8605 | 5.056  | 8.137  | 7.195  | 15.565 | 9.124  |
| 9 | 0.8615 | 10.490 | 17.222 | 14.200 | 11.566 | 8.720  |
| 9 | 0.8625 | 12.247 | 13.367 | 16.314 | 10.580 | 12.673 |
| 9 | 0.8635 | 18.133 | 15.652 | 17.824 | 10.029 | 9.938  |
| 9 | 0.8645 | 7.376  | 10.606 | 8.374  | 10.749 | 7.973  |
| 9 | 0.8655 | 5.734  | 6.494  | 10.656 | 11.279 | 9.683  |
| 9 | 0.8665 | 8.939  | 3.231  | 5.682  | 10.704 | 6.032  |
| 9 | 0.8675 | 12.871 | 7.511  | 10.083 | 9.887  | 3.987  |
| 9 | 0.8685 | 10.782 | 11.867 | 13.803 | 18.058 | 11.123 |
| 9 | 0.8695 | 14.321 | 10.980 | 6.216  | 17.604 | 18.382 |
| 9 | 0.8705 | 16.022 | 12.230 | 8.246  | 16.925 | 14.586 |
| 9 | 0.8715 | 5.740  | 5.223  | 3.970  | 10.270 | 4.867  |
| 9 | 0.8725 | 14.814 | 12.166 | 14.021 | 18.636 | 12.345 |
| 9 | 0.8735 | 18.954 | 14.612 | 17.019 | 9.161  | 8.323  |
| 9 | 0.8745 | 5.723  | 9.061  | 8.301  | 7.989  | 6.163  |
| 9 | 0.8755 | 8.195  | 11.147 | 11.619 | 16.778 | 10.134 |
| 9 | 0.8765 | 11.320 | 14.027 | 15.782 | 18.648 | 12.230 |
| 9 | 0.8775 | 10.624 | 7.083  | 12.336 | 13.537 | 11.821 |
| 9 | 0.8785 | 23.510 | 19.272 | 25.863 | 10.304 | 11.473 |
| 9 | 0.8795 | 4.114  | 4.745  | 3.920  | 9.772  | 4.700  |
| 9 | 0.8805 | 17.492 | 23.455 | 23.131 | 10.454 | 11.571 |
| 9 | 0.8815 | 13.502 | 24.235 | 21.663 | 23.575 | 27.841 |
| 9 | 0.8825 | 13.172 | 14.583 | 19.445 | 18.371 | 14.713 |
| 9 | 0.8835 | 21.174 | 24.779 | 19.359 | 10.315 | 19.439 |
| 9 | 0.8845 | 9.946  | 6.028  | 9.971  | 5.453  | 14.763 |

|    |        |        |        |        |        |        |
|----|--------|--------|--------|--------|--------|--------|
| 9  | 0.8855 | 11.963 | 7.812  | 10.738 | 15.833 | 12.732 |
| 9  | 0.8865 | 10.485 | 12.311 | 12.491 | 6.115  | 12.187 |
| 9  | 0.8875 | 11.863 | 11.817 | 9.774  | 7.471  | 18.058 |
| 9  | 0.8885 | 13.233 | 14.147 | 22.591 | 5.856  | 13.463 |
| 9  | 0.8895 | 14.783 | 13.309 | 13.116 | 7.765  | 15.164 |
| 9  | 0.8905 | 12.722 | 14.840 | 12.022 | 17.270 | 8.941  |
| 9  | 0.8915 | 29.899 | 31.226 | 30.999 | 17.737 | 11.481 |
| 9  | 0.8925 | 24.193 | 27.600 | 24.978 | 21.441 | 11.555 |
| 9  | 0.8935 | 13.176 | 13.157 | 14.062 | 13.210 | 17.091 |
| 9  | 0.8945 | 7.977  | 9.207  | 8.046  | 12.783 | 8.252  |
| 9  | 0.8955 | 19.333 | 17.888 | 21.300 | 15.430 | 7.050  |
| 9  | 0.8965 | 17.745 | 22.927 | 21.616 | 11.304 | 9.435  |
| 9  | 0.8975 | 10.025 | 11.529 | 17.600 | 10.640 | 8.714  |
| 9  | 0.8985 | 8.362  | 11.442 | 9.941  | 8.367  | 7.407  |
| 9  | 0.8995 | 13.924 | 19.340 | 16.352 | 8.002  | 7.149  |
| 9  | 0.9005 | 11.238 | 16.246 | 13.434 | 6.794  | 6.401  |
| 9  | 0.9015 | 6.848  | 12.633 | 9.439  | 7.318  | 2.704  |
| 9  | 0.9025 | 0.000  | 0.000  | 0.000  | 0.000  | 0.000  |
| 10 | 0.0027 | 0.000  | 0.000  | 0.000  | 0.000  | 0.000  |
| 10 | 0.0037 | 14.549 | 7.773  | 14.047 | 13.966 | 23.960 |
| 10 | 0.0047 | 8.058  | 12.374 | 10.995 | 14.067 | 21.692 |
| 10 | 0.0057 | 10.745 | 7.540  | 13.047 | 7.732  | 16.898 |
| 10 | 0.0067 | 16.589 | 9.566  | 14.969 | 14.876 | 22.922 |
| 10 | 0.0077 | 13.683 | 10.435 | 12.464 | 13.586 | 25.102 |
| 10 | 0.0087 | 11.574 | 9.809  | 12.179 | 9.825  | 24.589 |
| 10 | 0.0097 | 13.307 | 8.446  | 15.443 | 10.291 | 19.676 |
| 10 | 0.0107 | 20.887 | 9.733  | 14.862 | 12.296 | 29.134 |
| 10 | 0.0117 | 11.274 | 13.859 | 13.533 | 14.778 | 18.547 |
| 10 | 0.0127 | 10.887 | 3.860  | 8.643  | 14.084 | 11.598 |
| 10 | 0.0137 | 7.980  | 3.970  | 11.102 | 12.776 | 19.038 |
| 10 | 0.0147 | 9.775  | 11.995 | 9.631  | 6.890  | 18.666 |
| 10 | 0.0157 | 7.356  | 8.503  | 9.529  | 12.114 | 14.238 |
| 10 | 0.0167 | 7.645  | 10.727 | 8.588  | 7.185  | 8.188  |
| 10 | 0.0177 | 17.817 | 12.772 | 16.332 | 12.606 | 16.803 |
| 10 | 0.0187 | 14.365 | 14.468 | 11.276 | 9.255  | 10.819 |
| 10 | 0.0197 | 18.318 | 15.390 | 18.952 | 13.463 | 16.728 |
| 10 | 0.0207 | 12.188 | 13.056 | 19.221 | 10.379 | 25.335 |
| 10 | 0.0217 | 4.845  | 8.219  | 6.775  | 6.395  | 6.780  |
| 10 | 0.0227 | 3.054  | 5.557  | 8.306  | 11.855 | 10.123 |
| 10 | 0.0237 | 9.045  | 7.379  | 16.663 | 14.801 | 13.794 |
| 10 | 0.0247 | 27.005 | 17.801 | 30.076 | 20.472 | 12.066 |
| 10 | 0.0257 | 5.919  | 6.648  | 11.225 | 18.630 | 15.227 |
| 10 | 0.0267 | 5.832  | 6.396  | 6.803  | 19.073 | 8.694  |
| 10 | 0.0277 | 13.595 | 12.421 | 12.450 | 14.875 | 6.451  |
| 10 | 0.0287 | 14.332 | 7.016  | 12.848 | 15.056 | 14.520 |
| 10 | 0.0297 | 10.677 | 11.996 | 13.140 | 15.633 | 12.870 |
| 10 | 0.0307 | 20.356 | 14.796 | 16.839 | 12.331 | 16.114 |
| 10 | 0.0317 | 19.661 | 13.528 | 25.465 | 13.615 | 14.507 |
| 10 | 0.0327 | 14.871 | 4.551  | 10.617 | 12.813 | 25.023 |
| 10 | 0.0337 | 18.139 | 7.603  | 17.565 | 18.725 | 24.162 |

|    |        |        |        |        |        |        |
|----|--------|--------|--------|--------|--------|--------|
| 10 | 0.0347 | 11.739 | 7.916  | 9.392  | 15.860 | 17.939 |
| 10 | 0.0357 | 13.112 | 10.998 | 12.094 | 14.344 | 16.743 |
| 10 | 0.0367 | 13.093 | 14.602 | 14.586 | 21.426 | 25.269 |
| 10 | 0.0377 | 4.327  | 6.726  | 5.484  | 8.830  | 9.474  |
| 10 | 0.0387 | 21.306 | 22.731 | 24.250 | 12.676 | 7.470  |
| 10 | 0.0397 | 16.802 | 14.845 | 17.520 | 11.530 | 12.790 |
| 10 | 0.0407 | 13.226 | 11.840 | 16.485 | 19.181 | 10.058 |
| 10 | 0.0417 | 19.469 | 16.864 | 18.348 | 27.040 | 16.692 |
| 10 | 0.0427 | 20.660 | 9.172  | 19.097 | 18.899 | 18.739 |
| 10 | 0.0437 | 28.378 | 19.778 | 23.803 | 11.396 | 8.377  |
| 10 | 0.0447 | 18.376 | 20.948 | 26.694 | 18.462 | 12.044 |
| 10 | 0.0457 | 16.734 | 9.945  | 18.822 | 15.055 | 6.712  |
| 10 | 0.0467 | 21.449 | 20.930 | 24.168 | 13.537 | 18.241 |
| 10 | 0.0477 | 22.595 | 17.824 | 15.828 | 24.838 | 26.436 |
| 10 | 0.0487 | 31.463 | 32.656 | 41.513 | 20.228 | 14.097 |
| 10 | 0.0497 | 25.652 | 24.944 | 29.632 | 21.767 | 10.822 |
| 10 | 0.0507 | 21.371 | 20.537 | 24.743 | 17.091 | 13.137 |
| 10 | 0.0517 | 17.170 | 8.623  | 15.067 | 18.808 | 24.572 |
| 10 | 0.0527 | 15.286 | 9.167  | 14.993 | 24.741 | 24.353 |
| 10 | 0.0537 | 21.743 | 24.584 | 30.955 | 24.739 | 14.511 |
| 10 | 0.0547 | 15.246 | 19.822 | 18.413 | 24.205 | 18.287 |
| 10 | 0.0557 | 20.321 | 13.638 | 20.093 | 16.053 | 12.844 |
| 10 | 0.0567 | 21.085 | 13.238 | 11.382 | 19.320 | 12.096 |
| 10 | 0.0577 | 12.682 | 15.815 | 12.060 | 21.637 | 19.152 |
| 10 | 0.0587 | 14.554 | 15.306 | 18.300 | 20.073 | 14.914 |
| 10 | 0.0597 | 13.524 | 9.476  | 17.071 | 16.869 | 9.890  |
| 10 | 0.0607 | 15.680 | 21.763 | 26.078 | 14.619 | 7.935  |
| 10 | 0.0617 | 15.760 | 16.302 | 25.403 | 12.176 | 8.783  |
| 10 | 0.0627 | 25.726 | 25.167 | 32.151 | 18.821 | 16.948 |
| 10 | 0.0637 | 22.315 | 23.574 | 28.952 | 15.832 | 10.864 |
| 10 | 0.0647 | 20.712 | 21.512 | 26.035 | 8.670  | 9.007  |
| 10 | 0.0657 | 13.927 | 17.858 | 20.510 | 4.790  | 6.940  |
| 10 | 0.0667 | 9.870  | 11.680 | 12.098 | 10.569 | 13.678 |
| 10 | 0.0677 | 6.612  | 7.037  | 8.131  | 9.886  | 4.072  |
| 10 | 0.0687 | 12.173 | 12.304 | 12.630 | 14.344 | 15.347 |
| 10 | 0.0697 | 12.078 | 9.977  | 15.244 | 17.590 | 14.528 |
| 10 | 0.0707 | 12.695 | 9.472  | 12.414 | 9.657  | 14.983 |
| 10 | 0.0717 | 15.656 | 19.860 | 17.659 | 22.094 | 14.428 |
| 10 | 0.0727 | 17.313 | 19.836 | 21.604 | 12.176 | 14.355 |
| 10 | 0.0737 | 16.141 | 14.761 | 15.972 | 7.441  | 15.540 |
| 10 | 0.0747 | 14.764 | 14.735 | 10.946 | 17.463 | 23.065 |
| 10 | 0.0757 | 20.869 | 16.036 | 15.639 | 18.454 | 23.202 |
| 10 | 0.0767 | 10.489 | 14.188 | 11.833 | 11.821 | 22.293 |
| 10 | 0.0777 | 16.655 | 22.450 | 22.148 | 19.945 | 16.896 |
| 10 | 0.0787 | 10.072 | 4.079  | 8.769  | 13.060 | 11.536 |
| 10 | 0.0797 | 6.580  | 5.870  | 8.660  | 13.962 | 16.892 |
| 10 | 0.0807 | 8.809  | 9.624  | 12.454 | 11.647 | 15.253 |
| 10 | 0.0817 | 8.273  | 13.207 | 19.370 | 8.911  | 15.892 |
| 10 | 0.0827 | 10.368 | 9.222  | 10.683 | 19.404 | 21.303 |
| 10 | 0.0837 | 16.262 | 15.852 | 19.318 | 19.602 | 20.243 |

|    |        |        |        |        |        |        |
|----|--------|--------|--------|--------|--------|--------|
| 10 | 0.0847 | 7.966  | 13.786 | 14.772 | 19.780 | 14.240 |
| 10 | 0.0857 | 13.390 | 15.606 | 22.980 | 22.327 | 17.922 |
| 10 | 0.0867 | 5.315  | 10.403 | 8.860  | 19.158 | 18.099 |
| 10 | 0.0877 | 5.417  | 5.709  | 5.794  | 11.544 | 20.591 |
| 10 | 0.0887 | 9.066  | 9.856  | 10.907 | 17.137 | 20.370 |
| 10 | 0.0897 | 3.601  | 3.525  | 5.661  | 10.747 | 18.115 |
| 10 | 0.0907 | 7.459  | 5.406  | 4.901  | 3.714  | 22.552 |
| 10 | 0.0917 | 19.017 | 15.445 | 17.724 | 9.154  | 10.052 |
| 10 | 0.0927 | 14.908 | 12.796 | 14.511 | 14.062 | 18.607 |
| 10 | 0.0937 | 15.514 | 4.755  | 12.150 | 17.480 | 17.981 |
| 10 | 0.0947 | 15.764 | 11.896 | 17.456 | 27.616 | 11.974 |
| 10 | 0.0957 | 20.145 | 13.182 | 21.659 | 15.132 | 10.926 |
| 10 | 0.0967 | 17.681 | 17.375 | 21.654 | 11.554 | 13.756 |
| 10 | 0.0977 | 18.609 | 15.629 | 18.757 | 16.604 | 17.505 |
| 10 | 0.0987 | 10.683 | 8.590  | 10.592 | 11.128 | 7.618  |
| 10 | 0.0997 | 10.189 | 8.510  | 12.493 | 23.603 | 22.271 |
| 10 | 0.1007 | 7.714  | 10.731 | 16.187 | 20.495 | 19.762 |
| 10 | 0.1017 | 13.411 | 9.732  | 10.045 | 14.837 | 12.227 |
| 10 | 0.1027 | 11.967 | 5.525  | 7.718  | 12.708 | 10.833 |
| 10 | 0.1037 | 13.400 | 7.840  | 13.178 | 7.232  | 14.276 |
| 10 | 0.1047 | 19.647 | 9.995  | 14.260 | 19.358 | 17.035 |
| 10 | 0.1057 | 14.319 | 11.110 | 15.797 | 17.914 | 22.394 |
| 10 | 0.1067 | 14.496 | 11.427 | 15.766 | 16.544 | 9.343  |
| 10 | 0.1077 | 22.163 | 10.618 | 18.767 | 13.607 | 13.147 |
| 10 | 0.1087 | 9.781  | 8.025  | 4.446  | 12.668 | 10.687 |
| 10 | 0.1097 | 14.643 | 12.448 | 14.679 | 13.889 | 17.907 |
| 10 | 0.1107 | 14.874 | 10.749 | 15.675 | 9.490  | 11.354 |
| 10 | 0.1117 | 31.846 | 21.117 | 30.517 | 6.754  | 11.117 |
| 10 | 0.1127 | 13.831 | 10.084 | 14.755 | 6.218  | 7.598  |
| 10 | 0.1137 | 20.047 | 16.662 | 21.167 | 10.025 | 9.519  |
| 10 | 0.1147 | 12.918 | 9.809  | 14.273 | 6.713  | 4.788  |
| 10 | 0.1157 | 12.048 | 14.108 | 17.282 | 10.945 | 6.156  |
| 10 | 0.1167 | 18.814 | 14.156 | 25.666 | 14.267 | 9.964  |
| 10 | 0.1177 | 5.583  | 4.424  | 4.704  | 3.127  | 2.130  |
| 10 | 0.1187 | 11.705 | 6.530  | 10.268 | 9.350  | 5.920  |
| 10 | 0.1197 | 17.075 | 14.942 | 15.878 | 10.745 | 13.695 |
| 10 | 0.1207 | 9.560  | 9.684  | 8.333  | 6.966  | 11.687 |
| 10 | 0.1217 | 12.431 | 9.371  | 12.282 | 4.877  | 4.479  |
| 10 | 0.1227 | 12.208 | 7.750  | 10.349 | 7.302  | 5.212  |
| 10 | 0.1237 | 20.718 | 7.868  | 18.339 | 17.315 | 5.352  |
| 10 | 0.1247 | 12.419 | 3.357  | 7.490  | 9.228  | 6.018  |
| 10 | 0.1257 | 13.214 | 7.948  | 8.387  | 11.086 | 10.379 |
| 10 | 0.1267 | 7.362  | 5.683  | 9.085  | 10.106 | 16.626 |
| 10 | 0.1277 | 11.582 | 10.702 | 15.828 | 10.422 | 17.672 |
| 10 | 0.1287 | 9.453  | 11.598 | 14.344 | 13.551 | 9.549  |
| 10 | 0.1297 | 20.396 | 8.565  | 21.825 | 13.988 | 4.864  |
| 10 | 0.1307 | 18.148 | 6.737  | 18.360 | 17.406 | 1.835  |
| 10 | 0.1317 | 22.715 | 13.635 | 23.747 | 5.255  | 4.303  |
| 10 | 0.1327 | 18.618 | 11.483 | 17.723 | 9.760  | 4.160  |
| 10 | 0.1337 | 12.304 | 9.400  | 9.735  | 11.995 | 4.962  |

|    |        |        |        |        |        |        |
|----|--------|--------|--------|--------|--------|--------|
| 10 | 0.1347 | 22.755 | 24.429 | 27.108 | 8.685  | 5.944  |
| 10 | 0.1357 | 26.250 | 14.432 | 24.937 | 9.719  | 2.353  |
| 10 | 0.1367 | 10.432 | 10.270 | 14.404 | 12.209 | 13.112 |
| 10 | 0.1377 | 18.512 | 20.837 | 18.674 | 11.249 | 7.235  |
| 10 | 0.1387 | 15.299 | 13.595 | 15.137 | 10.138 | 13.287 |
| 10 | 0.1397 | 15.292 | 13.584 | 15.100 | 10.086 | 13.355 |
| 10 | 0.1407 | 11.814 | 7.668  | 14.482 | 9.511  | 13.384 |
| 10 | 0.1417 | 9.152  | 8.288  | 10.029 | 5.250  | 13.971 |
| 10 | 0.1427 | 29.296 | 19.975 | 25.233 | 6.368  | 8.725  |
| 10 | 0.1437 | 22.525 | 19.429 | 21.431 | 12.244 | 9.193  |
| 10 | 0.1447 | 19.756 | 9.989  | 15.284 | 11.008 | 17.639 |
| 10 | 0.1457 | 17.032 | 5.975  | 13.094 | 12.952 | 19.273 |
| 10 | 0.1467 | 7.879  | 8.585  | 11.617 | 14.407 | 10.815 |
| 10 | 0.1477 | 14.092 | 14.123 | 18.578 | 6.813  | 12.637 |
| 10 | 0.1487 | 13.862 | 16.206 | 19.908 | 15.334 | 15.970 |
| 10 | 0.1497 | 8.290  | 13.867 | 12.246 | 22.302 | 10.753 |
| 10 | 0.1507 | 24.710 | 24.165 | 27.478 | 11.463 | 21.948 |
| 10 | 0.1517 | 21.967 | 21.425 | 23.022 | 14.133 | 15.822 |
| 10 | 0.1527 | 21.854 | 19.117 | 26.213 | 19.418 | 18.910 |
| 10 | 0.1537 | 22.014 | 19.263 | 26.340 | 19.340 | 19.046 |
| 10 | 0.1547 | 14.574 | 12.740 | 10.529 | 21.734 | 21.058 |
| 10 | 0.1557 | 14.456 | 12.699 | 10.438 | 21.794 | 21.085 |
| 10 | 0.1567 | 16.242 | 11.188 | 15.717 | 13.409 | 13.605 |
| 10 | 0.1577 | 7.831  | 12.305 | 7.226  | 14.959 | 8.360  |
| 10 | 0.1587 | 19.254 | 21.060 | 15.199 | 20.914 | 11.633 |
| 10 | 0.1597 | 16.955 | 11.502 | 11.050 | 11.513 | 15.241 |
| 10 | 0.1607 | 10.089 | 13.240 | 11.317 | 10.513 | 15.190 |
| 10 | 0.1617 | 18.396 | 17.857 | 12.611 | 25.705 | 11.136 |
| 10 | 0.1627 | 19.227 | 24.020 | 17.475 | 26.434 | 13.319 |
| 10 | 0.1637 | 11.374 | 14.461 | 16.649 | 12.405 | 22.845 |
| 10 | 0.1647 | 14.032 | 11.828 | 12.963 | 20.270 | 25.369 |
| 10 | 0.1657 | 8.384  | 9.147  | 8.287  | 19.122 | 24.292 |
| 10 | 0.1667 | 7.499  | 11.518 | 7.506  | 21.127 | 24.369 |
| 10 | 0.1677 | 14.185 | 25.464 | 21.898 | 21.885 | 12.428 |
| 10 | 0.1687 | 9.921  | 20.488 | 19.209 | 23.498 | 13.052 |
| 10 | 0.1697 | 20.687 | 26.866 | 19.266 | 15.836 | 11.144 |
| 10 | 0.1707 | 26.144 | 27.025 | 23.150 | 24.017 | 26.153 |
| 10 | 0.1717 | 11.344 | 15.230 | 13.839 | 12.800 | 25.251 |
| 10 | 0.1727 | 8.934  | 7.864  | 6.491  | 13.464 | 8.364  |
| 10 | 0.1737 | 6.143  | 12.835 | 7.907  | 17.519 | 8.792  |
| 10 | 0.1747 | 6.440  | 12.019 | 10.597 | 18.447 | 7.326  |
| 10 | 0.1757 | 8.774  | 18.779 | 12.923 | 24.554 | 9.908  |
| 10 | 0.1767 | 8.218  | 9.301  | 13.165 | 7.574  | 11.804 |
| 10 | 0.1777 | 6.054  | 10.977 | 8.231  | 8.572  | 12.504 |
| 10 | 0.1787 | 8.938  | 14.263 | 11.094 | 13.003 | 17.599 |
| 10 | 0.1797 | 6.293  | 6.949  | 7.896  | 11.410 | 19.289 |
| 10 | 0.1807 | 4.994  | 6.841  | 2.927  | 10.646 | 21.047 |
| 10 | 0.1817 | 7.546  | 7.825  | 9.317  | 13.862 | 11.716 |
| 10 | 0.1827 | 7.540  | 9.842  | 9.978  | 15.173 | 11.843 |
| 10 | 0.1837 | 10.762 | 9.704  | 7.435  | 5.370  | 11.521 |

|    |        |        |        |        |        |        |
|----|--------|--------|--------|--------|--------|--------|
| 10 | 0.1847 | 10.157 | 9.211  | 7.436  | 7.368  | 10.764 |
| 10 | 0.1857 | 3.987  | 4.338  | 4.561  | 6.816  | 11.674 |
| 10 | 0.1867 | 2.689  | 7.756  | 2.410  | 9.226  | 15.774 |
| 10 | 0.1877 | 9.676  | 14.194 | 13.649 | 14.689 | 18.918 |
| 10 | 0.1887 | 10.466 | 13.689 | 9.160  | 15.219 | 18.528 |
| 10 | 0.1897 | 6.224  | 5.071  | 8.078  | 4.821  | 7.854  |
| 10 | 0.1907 | 10.506 | 12.345 | 13.560 | 6.310  | 7.172  |
| 10 | 0.1917 | 12.956 | 11.587 | 14.353 | 15.073 | 14.434 |
| 10 | 0.1927 | 18.864 | 10.666 | 13.494 | 11.416 | 9.710  |
| 10 | 0.1937 | 3.600  | 6.566  | 11.878 | 5.326  | 13.559 |
| 10 | 0.1947 | 8.533  | 7.776  | 9.576  | 8.732  | 10.157 |
| 10 | 0.1957 | 20.330 | 16.194 | 19.042 | 11.482 | 13.237 |
| 10 | 0.1967 | 18.034 | 14.871 | 18.665 | 11.391 | 20.433 |
| 10 | 0.1977 | 15.134 | 11.307 | 13.648 | 14.396 | 12.680 |
| 10 | 0.1987 | 7.392  | 5.284  | 6.497  | 11.082 | 11.490 |
| 10 | 0.1997 | 7.066  | 10.260 | 8.425  | 15.086 | 15.410 |
| 10 | 0.2007 | 15.542 | 9.463  | 10.046 | 10.993 | 17.613 |
| 10 | 0.2017 | 6.240  | 4.936  | 11.464 | 8.612  | 20.877 |
| 10 | 0.2027 | 6.599  | 6.291  | 9.681  | 3.328  | 12.786 |
| 10 | 0.2037 | 8.875  | 6.524  | 8.257  | 7.490  | 18.131 |
| 10 | 0.2047 | 4.794  | 6.554  | 7.973  | 7.795  | 11.103 |
| 10 | 0.2057 | 13.802 | 10.755 | 12.802 | 11.420 | 23.429 |
| 10 | 0.2067 | 16.657 | 14.902 | 17.777 | 13.089 | 13.854 |
| 10 | 0.2077 | 9.347  | 8.741  | 13.418 | 4.478  | 9.149  |
| 10 | 0.2087 | 9.343  | 8.744  | 13.411 | 4.456  | 9.158  |
| 10 | 0.2097 | 13.984 | 11.931 | 17.148 | 4.913  | 6.837  |
| 10 | 0.2107 | 7.885  | 12.025 | 12.072 | 9.172  | 18.103 |
| 10 | 0.2117 | 14.603 | 18.686 | 26.291 | 6.548  | 14.285 |
| 10 | 0.2127 | 5.306  | 7.960  | 10.398 | 5.709  | 2.462  |
| 10 | 0.2137 | 5.639  | 5.744  | 7.915  | 7.367  | 5.218  |
| 10 | 0.2147 | 7.311  | 3.882  | 6.240  | 5.233  | 15.809 |
| 10 | 0.2157 | 3.323  | 5.884  | 8.787  | 7.823  | 27.484 |
| 10 | 0.2167 | 6.627  | 13.235 | 10.677 | 9.709  | 14.673 |
| 10 | 0.2177 | 6.713  | 11.649 | 7.955  | 13.993 | 19.903 |
| 10 | 0.2187 | 1.319  | 5.785  | 3.838  | 12.474 | 9.502  |
| 10 | 0.2197 | 10.306 | 9.961  | 13.529 | 16.424 | 12.133 |
| 10 | 0.2207 | 7.513  | 14.959 | 15.530 | 13.819 | 20.671 |
| 10 | 0.2217 | 9.687  | 17.986 | 17.553 | 20.423 | 10.019 |
| 10 | 0.2227 | 6.982  | 10.286 | 10.346 | 4.641  | 7.528  |
| 10 | 0.2237 | 9.380  | 13.641 | 15.627 | 7.040  | 10.703 |
| 10 | 0.2247 | 10.350 | 9.723  | 13.885 | 8.722  | 9.855  |
| 10 | 0.2257 | 9.056  | 11.723 | 10.801 | 13.722 | 10.683 |
| 10 | 0.2267 | 10.529 | 17.940 | 13.819 | 23.239 | 22.829 |
| 10 | 0.2277 | 18.002 | 9.602  | 20.436 | 9.271  | 20.427 |
| 10 | 0.2287 | 13.950 | 9.029  | 14.497 | 11.484 | 21.012 |
| 10 | 0.2297 | 6.598  | 14.228 | 8.039  | 14.744 | 13.152 |
| 10 | 0.2307 | 25.205 | 14.209 | 19.354 | 19.570 | 20.298 |
| 10 | 0.2317 | 25.212 | 14.224 | 19.357 | 19.563 | 20.306 |
| 10 | 0.2327 | 20.909 | 19.046 | 23.486 | 15.813 | 16.037 |
| 10 | 0.2337 | 26.342 | 17.472 | 24.240 | 13.625 | 14.659 |

|    |        |        |        |        |        |        |
|----|--------|--------|--------|--------|--------|--------|
| 10 | 0.2347 | 16.185 | 10.367 | 15.318 | 6.906  | 9.685  |
| 10 | 0.2357 | 18.135 | 22.419 | 19.550 | 9.874  | 10.022 |
| 10 | 0.2367 | 18.107 | 22.388 | 19.533 | 9.878  | 9.999  |
| 10 | 0.2377 | 26.879 | 14.425 | 24.484 | 25.043 | 12.048 |
| 10 | 0.2387 | 26.674 | 14.051 | 25.138 | 21.888 | 13.103 |
| 10 | 0.2397 | 23.803 | 9.748  | 21.283 | 19.568 | 14.514 |
| 10 | 0.2407 | 8.761  | 6.937  | 18.151 | 5.353  | 11.355 |
| 10 | 0.2417 | 19.124 | 15.667 | 20.066 | 9.327  | 15.914 |
| 10 | 0.2427 | 5.219  | 6.448  | 6.068  | 8.132  | 11.754 |
| 10 | 0.2437 | 13.016 | 13.499 | 15.725 | 8.664  | 11.924 |
| 10 | 0.2447 | 28.883 | 24.406 | 33.313 | 16.956 | 6.630  |
| 10 | 0.2457 | 13.939 | 12.010 | 14.228 | 14.882 | 16.182 |
| 10 | 0.2467 | 14.999 | 16.773 | 17.045 | 7.506  | 6.747  |
| 10 | 0.2477 | 6.612  | 11.728 | 12.872 | 5.061  | 10.445 |
| 10 | 0.2487 | 7.030  | 7.124  | 9.378  | 4.210  | 11.410 |
| 10 | 0.2497 | 16.860 | 19.253 | 21.145 | 7.033  | 11.039 |
| 10 | 0.2507 | 7.988  | 5.764  | 6.889  | 11.506 | 17.267 |
| 10 | 0.2517 | 14.617 | 21.453 | 19.492 | 12.985 | 19.766 |
| 10 | 0.2527 | 20.849 | 20.302 | 22.957 | 12.962 | 19.875 |
| 10 | 0.2537 | 13.209 | 18.092 | 17.465 | 15.805 | 21.969 |
| 10 | 0.2547 | 14.381 | 10.471 | 14.151 | 10.123 | 21.443 |
| 10 | 0.2557 | 20.019 | 11.421 | 13.560 | 21.508 | 23.747 |
| 10 | 0.2567 | 17.773 | 12.383 | 14.827 | 25.557 | 21.834 |
| 10 | 0.2577 | 15.068 | 17.322 | 21.350 | 16.501 | 27.532 |
| 10 | 0.2587 | 11.685 | 16.002 | 20.871 | 8.217  | 17.210 |
| 10 | 0.2597 | 20.833 | 15.752 | 18.268 | 17.032 | 13.388 |
| 10 | 0.2607 | 18.428 | 15.852 | 15.435 | 29.363 | 19.563 |
| 10 | 0.2617 | 8.864  | 9.744  | 14.718 | 9.454  | 17.233 |
| 10 | 0.2627 | 14.166 | 16.543 | 19.814 | 13.059 | 21.393 |
| 10 | 0.2637 | 27.381 | 35.989 | 24.475 | 17.490 | 28.208 |
| 10 | 0.2647 | 13.115 | 10.335 | 13.048 | 6.996  | 8.768  |
| 10 | 0.2657 | 3.917  | 8.751  | 11.083 | 4.631  | 9.037  |
| 10 | 0.2667 | 9.583  | 8.171  | 10.277 | 7.486  | 11.022 |
| 10 | 0.2677 | 10.994 | 10.992 | 7.805  | 6.417  | 11.457 |
| 10 | 0.2687 | 3.017  | 5.149  | 5.642  | 10.307 | 10.527 |
| 10 | 0.2697 | 5.618  | 8.375  | 6.775  | 5.637  | 7.123  |
| 10 | 0.2707 | 10.182 | 7.411  | 5.551  | 9.310  | 12.469 |
| 10 | 0.2717 | 2.420  | 3.950  | 4.140  | 11.260 | 18.997 |
| 10 | 0.2727 | 6.209  | 9.551  | 10.808 | 9.859  | 18.102 |
| 10 | 0.2737 | 6.032  | 6.607  | 7.855  | 8.343  | 12.749 |
| 10 | 0.2747 | 1.622  | 4.344  | 3.168  | 8.226  | 7.502  |
| 10 | 0.2757 | 15.994 | 6.209  | 15.477 | 10.563 | 19.885 |
| 10 | 0.2767 | 9.023  | 6.142  | 12.626 | 8.637  | 18.334 |
| 10 | 0.2777 | 9.481  | 10.438 | 10.073 | 11.237 | 3.796  |
| 10 | 0.2787 | 9.762  | 7.901  | 7.263  | 11.994 | 6.879  |
| 10 | 0.2797 | 13.647 | 15.708 | 16.754 | 12.183 | 8.799  |
| 10 | 0.2807 | 20.140 | 19.905 | 19.779 | 20.835 | 12.389 |
| 10 | 0.2817 | 9.903  | 5.634  | 10.133 | 12.389 | 19.577 |
| 10 | 0.2827 | 12.173 | 9.996  | 11.507 | 5.657  | 16.661 |
| 10 | 0.2837 | 14.631 | 16.047 | 15.533 | 11.947 | 7.356  |

|    |        |        |        |        |        |        |
|----|--------|--------|--------|--------|--------|--------|
| 10 | 0.2847 | 13.101 | 12.065 | 11.097 | 15.030 | 19.530 |
| 10 | 0.2857 | 10.389 | 19.921 | 9.265  | 21.097 | 16.637 |
| 10 | 0.2867 | 12.466 | 24.491 | 20.729 | 23.474 | 21.266 |
| 10 | 0.2877 | 10.733 | 23.164 | 19.619 | 15.766 | 18.276 |
| 10 | 0.2887 | 7.091  | 12.698 | 16.381 | 12.623 | 14.285 |
| 10 | 0.2897 | 11.256 | 11.550 | 11.728 | 20.234 | 22.508 |
| 10 | 0.2907 | 6.040  | 7.462  | 6.570  | 12.005 | 7.704  |
| 10 | 0.2917 | 19.522 | 12.612 | 19.523 | 9.600  | 12.692 |
| 10 | 0.2927 | 12.312 | 15.715 | 17.379 | 6.486  | 12.273 |
| 10 | 0.2937 | 14.907 | 18.840 | 16.467 | 19.877 | 10.167 |
| 10 | 0.2947 | 11.310 | 13.655 | 13.951 | 24.544 | 22.189 |
| 10 | 0.2957 | 14.689 | 12.692 | 17.036 | 17.903 | 22.119 |
| 10 | 0.2967 | 15.952 | 13.220 | 15.109 | 11.913 | 11.286 |
| 10 | 0.2977 | 16.340 | 9.022  | 11.776 | 11.969 | 15.151 |
| 10 | 0.2987 | 17.021 | 10.766 | 10.994 | 13.860 | 14.309 |
| 10 | 0.2997 | 16.769 | 17.464 | 14.268 | 18.924 | 16.361 |
| 10 | 0.3007 | 17.761 | 19.384 | 19.360 | 19.612 | 8.021  |
| 10 | 0.3017 | 15.488 | 13.965 | 17.782 | 7.096  | 14.623 |
| 10 | 0.3027 | 7.567  | 6.188  | 6.010  | 3.647  | 6.675  |
| 10 | 0.3037 | 15.190 | 14.533 | 16.233 | 9.152  | 8.656  |
| 10 | 0.3047 | 16.917 | 11.267 | 13.082 | 11.671 | 5.944  |
| 10 | 0.3057 | 18.307 | 10.113 | 12.503 | 14.880 | 10.384 |
| 10 | 0.3067 | 7.578  | 11.389 | 9.147  | 17.593 | 13.911 |
| 10 | 0.3077 | 14.808 | 10.936 | 14.575 | 15.723 | 16.243 |
| 10 | 0.3087 | 8.667  | 12.925 | 16.925 | 13.106 | 16.193 |
| 10 | 0.3097 | 7.760  | 12.883 | 11.335 | 14.161 | 7.913  |
| 10 | 0.3107 | 12.198 | 16.724 | 22.516 | 4.681  | 9.989  |
| 10 | 0.3117 | 16.880 | 14.306 | 19.125 | 11.667 | 12.221 |
| 10 | 0.3127 | 21.036 | 23.409 | 27.236 | 9.234  | 9.178  |
| 10 | 0.3137 | 22.286 | 31.412 | 32.602 | 11.302 | 9.922  |
| 10 | 0.3147 | 14.023 | 16.591 | 15.863 | 4.599  | 5.525  |
| 10 | 0.3157 | 19.231 | 17.538 | 19.638 | 15.412 | 14.515 |
| 10 | 0.3167 | 12.904 | 16.457 | 18.008 | 10.356 | 17.169 |
| 10 | 0.3177 | 5.560  | 8.018  | 9.152  | 15.363 | 11.529 |
| 10 | 0.3187 | 11.974 | 15.191 | 18.236 | 14.269 | 16.570 |
| 10 | 0.3197 | 9.735  | 17.455 | 19.054 | 13.366 | 15.719 |
| 10 | 0.3207 | 9.227  | 11.412 | 13.172 | 6.456  | 16.135 |
| 10 | 0.3217 | 4.246  | 2.017  | 3.632  | 1.908  | 3.894  |
| 10 | 0.3227 | 11.458 | 8.608  | 13.310 | 10.286 | 10.716 |
| 10 | 0.3237 | 14.475 | 16.884 | 16.380 | 9.481  | 3.797  |
| 10 | 0.3247 | 12.727 | 5.605  | 11.397 | 8.674  | 17.452 |
| 10 | 0.3257 | 11.094 | 3.278  | 6.409  | 7.911  | 4.520  |
| 10 | 0.3267 | 16.955 | 12.278 | 20.500 | 9.549  | 6.197  |
| 10 | 0.3277 | 24.208 | 21.425 | 23.002 | 15.731 | 17.744 |
| 10 | 0.3287 | 11.383 | 9.534  | 9.451  | 0.752  | 12.351 |
| 10 | 0.3297 | 5.746  | 2.007  | 5.443  | 3.433  | 4.440  |
| 10 | 0.3307 | 9.157  | 6.722  | 7.511  | 10.407 | 17.836 |
| 10 | 0.3317 | 7.631  | 6.870  | 7.013  | 10.557 | 17.487 |
| 10 | 0.3327 | 10.251 | 13.058 | 14.191 | 13.550 | 16.900 |
| 10 | 0.3337 | 9.643  | 15.314 | 14.854 | 12.772 | 16.776 |



|    |        |        |        |        |        |        |
|----|--------|--------|--------|--------|--------|--------|
| 10 | 0.3347 | 7.597  | 4.819  | 12.045 | 4.676  | 6.744  |
| 10 | 0.3357 | 6.018  | 3.598  | 9.027  | 8.024  | 2.439  |
| 10 | 0.3367 | 12.263 | 13.245 | 18.667 | 12.085 | 6.270  |
| 10 | 0.3377 | 25.598 | 24.746 | 36.620 | 15.577 | 4.191  |
| 10 | 0.3387 | 25.556 | 24.753 | 36.623 | 15.559 | 4.192  |
| 10 | 0.3397 | 19.152 | 14.188 | 22.467 | 6.277  | 4.868  |
| 10 | 0.3407 | 16.360 | 15.912 | 14.579 | 7.524  | 5.008  |
| 10 | 0.3417 | 22.491 | 25.852 | 26.528 | 7.969  | 11.758 |
| 10 | 0.3427 | 9.396  | 8.853  | 11.618 | 16.166 | 17.486 |
| 10 | 0.3437 | 10.216 | 13.077 | 16.768 | 11.162 | 19.761 |
| 10 | 0.3447 | 7.490  | 13.863 | 13.223 | 19.399 | 12.248 |
| 10 | 0.3457 | 7.529  | 13.926 | 13.247 | 19.447 | 12.236 |
| 10 | 0.3467 | 14.382 | 9.796  | 16.303 | 16.073 | 11.681 |
| 10 | 0.3477 | 16.890 | 21.730 | 22.000 | 16.938 | 6.272  |
| 10 | 0.3487 | 14.198 | 16.055 | 12.722 | 19.122 | 20.131 |
| 10 | 0.3497 | 6.320  | 6.249  | 8.600  | 7.315  | 12.505 |
| 10 | 0.3507 | 4.612  | 6.374  | 5.170  | 11.503 | 15.851 |
| 10 | 0.3517 | 13.777 | 13.256 | 16.028 | 9.675  | 9.224  |
| 10 | 0.3527 | 15.387 | 11.268 | 14.717 | 7.643  | 11.357 |
| 10 | 0.3537 | 25.054 | 27.189 | 29.139 | 13.528 | 11.499 |
| 10 | 0.3547 | 28.902 | 26.267 | 29.607 | 12.644 | 13.250 |
| 10 | 0.3557 | 20.651 | 29.988 | 31.996 | 6.623  | 15.575 |
| 10 | 0.3567 | 14.005 | 19.425 | 26.902 | 7.159  | 23.408 |
| 10 | 0.3577 | 20.099 | 18.190 | 24.818 | 16.113 | 21.543 |
| 10 | 0.3587 | 16.823 | 14.867 | 21.569 | 16.799 | 19.861 |
| 10 | 0.3597 | 7.407  | 5.585  | 11.392 | 9.447  | 17.274 |
| 10 | 0.3607 | 17.637 | 24.426 | 26.920 | 11.150 | 13.277 |
| 10 | 0.3617 | 18.391 | 18.591 | 26.611 | 5.113  | 24.092 |
| 10 | 0.3627 | 12.063 | 14.030 | 14.385 | 5.452  | 11.766 |
| 10 | 0.3637 | 6.834  | 10.026 | 10.978 | 5.951  | 5.285  |
| 10 | 0.3647 | 8.849  | 11.162 | 9.767  | 10.223 | 8.562  |
| 10 | 0.3657 | 9.708  | 15.476 | 13.200 | 10.561 | 5.537  |
| 10 | 0.3667 | 23.751 | 25.095 | 22.937 | 15.828 | 17.318 |
| 10 | 0.3677 | 16.814 | 17.499 | 19.690 | 16.871 | 17.943 |
| 10 | 0.3687 | 14.105 | 13.575 | 15.500 | 11.986 | 15.643 |
| 10 | 0.3697 | 18.453 | 16.065 | 20.400 | 12.595 | 13.588 |
| 10 | 0.3707 | 27.943 | 26.432 | 22.713 | 12.982 | 19.345 |
| 10 | 0.3717 | 22.766 | 20.683 | 27.759 | 10.506 | 19.396 |
| 10 | 0.3727 | 22.817 | 16.093 | 25.497 | 10.251 | 19.510 |
| 10 | 0.3737 | 12.795 | 18.099 | 18.461 | 9.847  | 16.539 |
| 10 | 0.3747 | 12.305 | 17.209 | 15.662 | 10.698 | 16.003 |
| 10 | 0.3757 | 8.776  | 11.095 | 8.982  | 7.197  | 7.711  |
| 10 | 0.3767 | 4.427  | 2.571  | 5.489  | 9.186  | 6.783  |
| 10 | 0.3777 | 7.513  | 5.627  | 12.425 | 10.860 | 13.859 |
| 10 | 0.3787 | 14.971 | 14.203 | 22.558 | 9.490  | 11.088 |
| 10 | 0.3797 | 7.675  | 11.353 | 13.164 | 5.893  | 3.610  |
| 10 | 0.3807 | 4.630  | 4.533  | 4.831  | 8.509  | 3.375  |
| 10 | 0.3817 | 7.363  | 9.997  | 8.785  | 9.197  | 9.888  |
| 10 | 0.3827 | 8.375  | 9.638  | 9.209  | 8.693  | 13.744 |
| 10 | 0.3837 | 12.945 | 16.340 | 19.920 | 14.232 | 12.676 |

|    |        |        |        |        |        |        |
|----|--------|--------|--------|--------|--------|--------|
| 10 | 0.3847 | 14.880 | 22.298 | 19.323 | 10.012 | 5.234  |
| 10 | 0.3857 | 10.289 | 14.026 | 13.369 | 10.758 | 12.360 |
| 10 | 0.3867 | 16.309 | 11.996 | 18.399 | 7.594  | 13.054 |
| 10 | 0.3877 | 14.243 | 21.724 | 16.683 | 16.362 | 16.124 |
| 10 | 0.3887 | 18.605 | 24.970 | 22.433 | 14.058 | 25.630 |
| 10 | 0.3897 | 6.218  | 9.072  | 7.576  | 15.516 | 21.135 |
| 10 | 0.3907 | 6.268  | 5.977  | 6.149  | 7.018  | 4.882  |
| 10 | 0.3917 | 7.791  | 7.796  | 11.839 | 5.308  | 9.272  |
| 10 | 0.3927 | 10.710 | 14.606 | 18.568 | 15.557 | 24.298 |
| 10 | 0.3937 | 10.054 | 5.982  | 8.605  | 12.941 | 8.525  |
| 10 | 0.3947 | 5.792  | 3.370  | 4.706  | 8.307  | 12.139 |
| 10 | 0.3957 | 11.324 | 16.058 | 10.990 | 9.562  | 17.925 |
| 10 | 0.3967 | 12.627 | 14.853 | 14.550 | 7.625  | 11.739 |
| 10 | 0.3977 | 8.350  | 8.578  | 9.196  | 15.700 | 20.674 |
| 10 | 0.3987 | 3.178  | 7.649  | 9.159  | 12.152 | 16.651 |
| 10 | 0.3997 | 9.236  | 9.277  | 11.203 | 6.950  | 10.338 |
| 10 | 0.4007 | 18.219 | 17.284 | 19.845 | 9.799  | 22.446 |
| 10 | 0.4017 | 9.435  | 16.086 | 11.287 | 15.850 | 21.170 |
| 10 | 0.4027 | 14.458 | 18.176 | 19.111 | 19.452 | 18.509 |
| 10 | 0.4037 | 11.182 | 9.057  | 14.494 | 13.084 | 19.644 |
| 10 | 0.4047 | 12.525 | 17.988 | 23.131 | 8.458  | 19.431 |
| 10 | 0.4057 | 10.457 | 8.468  | 14.350 | 15.755 | 17.273 |
| 10 | 0.4067 | 11.716 | 11.145 | 18.093 | 13.974 | 18.723 |
| 10 | 0.4077 | 13.964 | 11.446 | 14.556 | 8.645  | 9.285  |
| 10 | 0.4087 | 21.839 | 19.430 | 23.087 | 19.722 | 19.641 |
| 10 | 0.4097 | 26.111 | 25.485 | 24.176 | 7.123  | 16.755 |
| 10 | 0.4107 | 21.241 | 10.395 | 15.537 | 9.412  | 17.090 |
| 10 | 0.4117 | 16.796 | 12.468 | 13.735 | 15.642 | 23.311 |
| 10 | 0.4127 | 4.104  | 5.646  | 5.201  | 5.173  | 13.885 |
| 10 | 0.4137 | 2.643  | 3.773  | 3.692  | 5.358  | 16.170 |
| 10 | 0.4147 | 1.982  | 2.776  | 3.077  | 3.376  | 11.597 |
| 10 | 0.4157 | 6.081  | 3.302  | 5.701  | 9.499  | 9.659  |
| 10 | 0.4167 | 4.884  | 4.487  | 6.707  | 10.884 | 12.958 |
| 10 | 0.4177 | 2.171  | 1.998  | 2.258  | 4.918  | 11.493 |
| 10 | 0.4187 | 7.839  | 5.691  | 7.959  | 12.215 | 17.809 |
| 10 | 0.4197 | 10.775 | 7.837  | 9.550  | 11.181 | 15.946 |
| 10 | 0.4207 | 11.588 | 3.191  | 10.808 | 6.926  | 6.007  |
| 10 | 0.4217 | 15.421 | 12.953 | 16.476 | 8.800  | 7.160  |
| 10 | 0.4227 | 17.656 | 22.025 | 20.166 | 13.628 | 15.189 |
| 10 | 0.4237 | 11.077 | 18.523 | 12.854 | 11.875 | 10.333 |
| 10 | 0.4247 | 3.687  | 3.961  | 3.444  | 5.317  | 4.896  |
| 10 | 0.4257 | 1.319  | 0.872  | 3.494  | 1.782  | 1.981  |
| 10 | 0.4267 | 6.600  | 4.732  | 10.525 | 4.929  | 8.348  |
| 10 | 0.4277 | 17.335 | 12.723 | 14.278 | 9.836  | 14.803 |
| 10 | 0.4287 | 16.164 | 16.492 | 21.076 | 8.081  | 16.384 |
| 10 | 0.4297 | 14.139 | 13.707 | 13.099 | 8.403  | 12.060 |
| 10 | 0.4307 | 7.946  | 11.094 | 14.616 | 7.073  | 16.974 |
| 10 | 0.4317 | 10.528 | 5.934  | 7.597  | 4.230  | 21.616 |
| 10 | 0.4327 | 10.263 | 10.441 | 10.711 | 3.389  | 16.755 |
| 10 | 0.4337 | 5.662  | 6.907  | 9.663  | 6.459  | 21.840 |

|    |        |        |        |        |        |        |
|----|--------|--------|--------|--------|--------|--------|
| 10 | 0.4347 | 7.517  | 16.855 | 17.354 | 12.686 | 28.830 |
| 10 | 0.4357 | 7.641  | 10.959 | 12.008 | 10.554 | 32.315 |
| 10 | 0.4367 | 8.251  | 15.968 | 15.076 | 7.547  | 22.488 |
| 10 | 0.4377 | 5.828  | 6.129  | 4.950  | 7.914  | 24.826 |
| 10 | 0.4387 | 8.076  | 11.135 | 5.659  | 18.114 | 25.192 |
| 10 | 0.4397 | 11.354 | 11.597 | 12.721 | 14.456 | 35.852 |
| 10 | 0.4407 | 6.608  | 7.512  | 8.924  | 15.026 | 28.408 |
| 10 | 0.4417 | 10.067 | 10.556 | 11.430 | 14.662 | 35.802 |
| 10 | 0.4427 | 5.317  | 3.387  | 6.358  | 6.551  | 9.046  |
| 10 | 0.4437 | 5.963  | 3.373  | 7.009  | 6.603  | 8.153  |
| 10 | 0.4447 | 7.326  | 8.779  | 6.557  | 9.380  | 4.251  |
| 10 | 0.4457 | 12.544 | 12.246 | 8.914  | 11.393 | 10.498 |
| 10 | 0.4467 | 11.068 | 21.732 | 20.936 | 10.480 | 13.778 |
| 10 | 0.4477 | 16.092 | 14.448 | 14.223 | 11.440 | 16.364 |
| 10 | 0.4487 | 21.464 | 16.651 | 14.606 | 9.512  | 24.642 |
| 10 | 0.4497 | 18.405 | 15.857 | 16.212 | 12.822 | 22.162 |
| 10 | 0.4507 | 11.898 | 18.675 | 14.684 | 13.272 | 32.329 |
| 10 | 0.4517 | 10.114 | 7.125  | 12.813 | 16.635 | 30.595 |
| 10 | 0.4527 | 13.629 | 12.602 | 11.022 | 10.111 | 24.094 |
| 10 | 0.4537 | 5.997  | 5.412  | 5.413  | 11.008 | 21.669 |
| 10 | 0.4547 | 5.997  | 4.720  | 5.947  | 9.784  | 10.495 |
| 10 | 0.4557 | 9.582  | 9.702  | 6.973  | 5.567  | 5.627  |
| 10 | 0.4567 | 34.825 | 31.919 | 26.273 | 7.900  | 10.243 |
| 10 | 0.4577 | 6.619  | 16.702 | 9.783  | 14.308 | 28.214 |
| 10 | 0.4587 | 14.927 | 32.242 | 18.671 | 20.010 | 19.107 |
| 10 | 0.4597 | 13.533 | 16.734 | 12.889 | 21.824 | 18.228 |
| 10 | 0.4607 | 7.807  | 6.375  | 6.970  | 12.886 | 13.915 |
| 10 | 0.4617 | 14.089 | 6.297  | 11.548 | 18.873 | 18.555 |
| 10 | 0.4627 | 13.623 | 11.941 | 9.895  | 15.655 | 29.702 |
| 10 | 0.4637 | 4.316  | 8.089  | 4.966  | 16.054 | 26.257 |
| 10 | 0.4647 | 8.361  | 8.541  | 6.834  | 13.800 | 24.285 |
| 10 | 0.4657 | 19.747 | 27.720 | 13.073 | 21.954 | 14.691 |
| 10 | 0.4667 | 15.484 | 11.066 | 10.044 | 18.201 | 26.732 |
| 10 | 0.4677 | 19.168 | 16.218 | 17.448 | 22.796 | 21.119 |
| 10 | 0.4687 | 5.486  | 4.705  | 6.511  | 27.188 | 27.222 |
| 10 | 0.4697 | 9.597  | 9.496  | 9.728  | 12.536 | 25.839 |
| 10 | 0.4707 | 11.578 | 7.136  | 11.583 | 7.138  | 19.847 |
| 10 | 0.4717 | 6.669  | 6.904  | 7.081  | 11.445 | 20.119 |
| 10 | 0.4727 | 18.956 | 23.310 | 16.406 | 6.661  | 20.264 |
| 10 | 0.4737 | 6.593  | 14.964 | 10.224 | 14.428 | 24.871 |
| 10 | 0.4747 | 11.227 | 11.765 | 10.450 | 3.909  | 8.400  |
| 10 | 0.4757 | 7.583  | 5.348  | 5.372  | 4.748  | 9.589  |
| 10 | 0.4767 | 6.474  | 5.452  | 5.077  | 3.332  | 4.455  |
| 10 | 0.4777 | 4.403  | 10.050 | 4.222  | 3.367  | 10.412 |
| 10 | 0.4787 | 10.702 | 20.105 | 10.890 | 11.453 | 23.003 |
| 10 | 0.4797 | 5.868  | 7.082  | 4.618  | 7.509  | 24.793 |
| 10 | 0.4807 | 7.701  | 7.035  | 5.933  | 6.756  | 24.328 |
| 10 | 0.4817 | 7.361  | 9.355  | 4.030  | 18.260 | 24.184 |
| 10 | 0.4827 | 10.922 | 9.356  | 7.931  | 21.857 | 30.019 |
| 10 | 0.4837 | 16.731 | 9.753  | 12.163 | 10.041 | 12.857 |

|    |        |        |        |        |        |        |
|----|--------|--------|--------|--------|--------|--------|
| 10 | 0.4847 | 14.402 | 9.161  | 12.924 | 4.650  | 17.428 |
| 10 | 0.4857 | 8.554  | 10.222 | 8.486  | 12.254 | 17.882 |
| 10 | 0.4867 | 9.554  | 7.375  | 6.636  | 14.084 | 32.349 |
| 10 | 0.4877 | 4.443  | 7.175  | 4.882  | 12.066 | 19.177 |
| 10 | 0.4887 | 12.756 | 20.891 | 15.351 | 12.411 | 20.020 |
| 10 | 0.4897 | 13.245 | 20.356 | 18.337 | 9.752  | 13.473 |
| 10 | 0.4907 | 23.721 | 14.776 | 13.646 | 3.531  | 16.388 |
| 10 | 0.4917 | 23.835 | 14.829 | 13.704 | 3.524  | 16.451 |
| 10 | 0.4927 | 12.134 | 4.941  | 7.808  | 6.766  | 13.091 |
| 10 | 0.4937 | 9.106  | 3.288  | 7.348  | 8.617  | 11.344 |
| 10 | 0.4947 | 3.572  | 1.785  | 3.069  | 3.316  | 4.835  |
| 10 | 0.4957 | 13.652 | 9.787  | 11.547 | 8.230  | 21.080 |
| 10 | 0.4967 | 9.846  | 11.224 | 8.859  | 16.517 | 27.937 |
| 10 | 0.4977 | 9.471  | 7.922  | 6.690  | 14.640 | 15.600 |
| 10 | 0.4987 | 3.878  | 7.935  | 3.929  | 9.815  | 10.774 |
| 10 | 0.4997 | 8.712  | 9.661  | 11.734 | 4.254  | 15.078 |
| 10 | 0.5007 | 3.306  | 5.242  | 2.640  | 15.561 | 25.536 |
| 10 | 0.5017 | 7.365  | 6.664  | 6.450  | 7.923  | 14.014 |
| 10 | 0.5027 | 6.646  | 5.460  | 5.988  | 6.551  | 7.893  |
| 10 | 0.5037 | 3.046  | 3.213  | 3.057  | 4.343  | 4.019  |
| 10 | 0.5047 | 5.857  | 9.086  | 10.574 | 9.795  | 21.818 |
| 10 | 0.5057 | 5.863  | 9.092  | 10.560 | 9.793  | 21.705 |
| 10 | 0.5067 | 4.717  | 9.620  | 4.571  | 14.036 | 18.725 |
| 10 | 0.5077 | 9.738  | 13.840 | 5.426  | 31.681 | 17.099 |
| 10 | 0.5087 | 5.751  | 7.956  | 3.908  | 18.354 | 21.619 |
| 10 | 0.5097 | 28.753 | 24.333 | 24.854 | 15.275 | 12.404 |
| 10 | 0.5107 | 13.886 | 8.994  | 12.631 | 7.305  | 11.253 |
| 10 | 0.5117 | 7.956  | 6.818  | 5.110  | 9.309  | 8.707  |
| 10 | 0.5127 | 11.150 | 8.059  | 6.160  | 9.779  | 12.748 |
| 10 | 0.5137 | 14.342 | 15.893 | 14.222 | 5.940  | 13.655 |
| 10 | 0.5147 | 5.982  | 10.339 | 9.564  | 16.430 | 19.967 |
| 10 | 0.5157 | 9.945  | 10.545 | 10.492 | 21.357 | 28.056 |
| 10 | 0.5167 | 9.409  | 9.259  | 6.254  | 10.410 | 20.401 |
| 10 | 0.5177 | 12.390 | 13.551 | 8.145  | 7.879  | 15.248 |
| 10 | 0.5187 | 23.767 | 20.305 | 18.495 | 13.139 | 14.753 |
| 10 | 0.5197 | 16.690 | 12.313 | 8.566  | 9.315  | 19.228 |
| 10 | 0.5207 | 19.117 | 19.479 | 12.890 | 6.146  | 9.871  |
| 10 | 0.5217 | 14.543 | 16.899 | 11.701 | 11.799 | 7.703  |
| 10 | 0.5227 | 13.532 | 22.047 | 10.332 | 19.100 | 19.811 |
| 10 | 0.5237 | 15.228 | 25.609 | 14.026 | 16.673 | 7.493  |
| 10 | 0.5247 | 25.365 | 26.241 | 15.957 | 13.390 | 16.356 |
| 10 | 0.5257 | 25.401 | 26.212 | 15.929 | 13.394 | 16.392 |
| 10 | 0.5267 | 17.805 | 21.808 | 16.422 | 9.160  | 17.786 |
| 10 | 0.5277 | 8.858  | 11.472 | 13.659 | 15.905 | 13.281 |
| 10 | 0.5287 | 8.870  | 11.365 | 13.499 | 15.818 | 12.908 |
| 10 | 0.5297 | 6.194  | 8.953  | 11.576 | 14.528 | 15.023 |
| 10 | 0.5307 | 6.265  | 14.237 | 14.136 | 9.347  | 10.792 |
| 10 | 0.5317 | 6.265  | 14.229 | 14.133 | 9.351  | 10.790 |
| 10 | 0.5327 | 14.123 | 15.681 | 17.137 | 13.944 | 19.128 |
| 10 | 0.5337 | 15.309 | 13.970 | 15.758 | 10.228 | 7.613  |

|    |        |        |        |        |        |        |
|----|--------|--------|--------|--------|--------|--------|
| 10 | 0.5347 | 15.317 | 13.941 | 15.817 | 10.209 | 7.575  |
| 10 | 0.5357 | 15.324 | 13.912 | 15.876 | 10.189 | 7.537  |
| 10 | 0.5367 | 12.182 | 19.209 | 12.822 | 10.806 | 7.304  |
| 10 | 0.5377 | 12.385 | 20.915 | 12.258 | 14.637 | 19.254 |
| 10 | 0.5387 | 11.949 | 9.560  | 9.401  | 2.674  | 3.126  |
| 10 | 0.5397 | 17.030 | 22.283 | 14.344 | 4.690  | 14.151 |
| 10 | 0.5407 | 24.848 | 21.919 | 19.727 | 12.260 | 26.780 |
| 10 | 0.5417 | 21.721 | 27.845 | 22.246 | 11.361 | 27.958 |
| 10 | 0.5427 | 18.315 | 29.913 | 18.950 | 22.431 | 36.718 |
| 10 | 0.5437 | 17.228 | 34.787 | 19.032 | 23.084 | 34.918 |
| 10 | 0.5447 | 13.980 | 21.578 | 16.081 | 10.276 | 10.847 |
| 10 | 0.5457 | 14.987 | 16.076 | 21.055 | 7.060  | 14.151 |
| 10 | 0.5467 | 14.987 | 16.074 | 21.052 | 7.061  | 14.167 |
| 10 | 0.5477 | 13.408 | 19.827 | 11.007 | 4.860  | 17.737 |
| 10 | 0.5487 | 12.945 | 15.929 | 6.045  | 16.864 | 17.995 |
| 10 | 0.5497 | 13.773 | 12.661 | 9.601  | 5.353  | 8.042  |
| 10 | 0.5507 | 13.938 | 21.405 | 10.965 | 19.421 | 19.449 |
| 10 | 0.5517 | 4.869  | 18.334 | 13.223 | 18.504 | 14.083 |
| 10 | 0.5527 | 11.982 | 18.577 | 13.278 | 9.984  | 21.684 |
| 10 | 0.5537 | 15.886 | 17.850 | 16.206 | 10.882 | 14.698 |
| 10 | 0.5547 | 5.058  | 5.679  | 10.678 | 13.324 | 11.691 |
| 10 | 0.5557 | 6.349  | 13.029 | 8.134  | 15.040 | 13.442 |
| 10 | 0.5567 | 9.592  | 19.892 | 13.213 | 11.488 | 13.305 |
| 10 | 0.5577 | 9.762  | 15.635 | 8.346  | 6.747  | 20.673 |
| 10 | 0.5587 | 6.496  | 3.170  | 2.813  | 7.529  | 14.822 |
| 10 | 0.5597 | 7.478  | 4.433  | 3.614  | 8.644  | 16.379 |
| 10 | 0.5607 | 9.705  | 14.008 | 8.319  | 5.935  | 12.213 |
| 10 | 0.5617 | 9.197  | 8.693  | 6.337  | 5.779  | 13.604 |
| 10 | 0.5627 | 3.775  | 4.964  | 8.360  | 3.579  | 13.936 |
| 10 | 0.5637 | 9.003  | 12.022 | 11.165 | 4.255  | 7.119  |
| 10 | 0.5647 | 6.233  | 5.941  | 3.977  | 4.056  | 5.365  |
| 10 | 0.5657 | 5.938  | 3.883  | 4.046  | 2.914  | 4.350  |
| 10 | 0.5667 | 9.654  | 6.845  | 8.380  | 9.371  | 11.113 |
| 10 | 0.5677 | 19.666 | 14.120 | 17.213 | 5.499  | 19.950 |
| 10 | 0.5687 | 21.617 | 22.432 | 27.532 | 10.721 | 23.664 |
| 10 | 0.5697 | 21.627 | 22.399 | 27.418 | 10.652 | 23.612 |
| 10 | 0.5707 | 7.639  | 13.263 | 11.059 | 11.538 | 33.101 |
| 10 | 0.5717 | 7.662  | 13.140 | 10.956 | 11.491 | 32.961 |
| 10 | 0.5727 | 7.419  | 16.520 | 7.125  | 8.003  | 26.148 |
| 10 | 0.5737 | 13.778 | 11.308 | 12.328 | 5.411  | 7.299  |
| 10 | 0.5747 | 15.639 | 22.359 | 13.189 | 11.397 | 28.768 |
| 10 | 0.5757 | 12.928 | 19.437 | 12.002 | 18.947 | 30.057 |
| 10 | 0.5767 | 11.677 | 7.159  | 9.437  | 12.648 | 20.237 |
| 10 | 0.5777 | 14.300 | 16.285 | 12.528 | 13.053 | 13.823 |
| 10 | 0.5787 | 13.359 | 17.049 | 16.383 | 11.023 | 10.141 |
| 10 | 0.5797 | 16.593 | 23.130 | 23.414 | 10.042 | 19.855 |
| 10 | 0.5807 | 12.862 | 7.095  | 10.613 | 10.612 | 17.696 |
| 10 | 0.5817 | 12.998 | 7.180  | 10.740 | 10.604 | 17.556 |
| 10 | 0.5827 | 8.636  | 9.274  | 8.475  | 17.180 | 10.179 |
| 10 | 0.5837 | 8.613  | 9.231  | 8.436  | 17.176 | 10.147 |

|    |        |        |        |        |        |        |
|----|--------|--------|--------|--------|--------|--------|
| 10 | 0.5847 | 10.978 | 8.670  | 11.030 | 11.343 | 22.661 |
| 10 | 0.5857 | 12.536 | 7.908  | 11.835 | 15.870 | 21.887 |
| 10 | 0.5867 | 17.842 | 16.814 | 16.146 | 10.636 | 25.771 |
| 10 | 0.5877 | 14.393 | 8.771  | 17.953 | 14.855 | 16.872 |
| 10 | 0.5887 | 20.666 | 24.871 | 24.276 | 12.565 | 32.362 |
| 10 | 0.5897 | 10.153 | 9.696  | 8.361  | 10.621 | 11.444 |
| 10 | 0.5907 | 8.514  | 9.447  | 9.317  | 24.540 | 21.977 |
| 10 | 0.5917 | 8.879  | 12.525 | 9.560  | 15.636 | 28.899 |
| 10 | 0.5927 | 14.765 | 17.390 | 15.408 | 19.881 | 24.028 |
| 10 | 0.5937 | 14.983 | 15.358 | 16.881 | 18.721 | 20.603 |
| 10 | 0.5947 | 4.321  | 5.686  | 8.958  | 8.389  | 8.666  |
| 10 | 0.5957 | 6.167  | 11.532 | 5.535  | 8.134  | 16.792 |
| 10 | 0.5967 | 16.458 | 13.967 | 11.494 | 8.425  | 18.664 |
| 10 | 0.5977 | 7.775  | 9.459  | 10.591 | 13.868 | 10.817 |
| 10 | 0.5987 | 7.787  | 6.368  | 11.138 | 15.979 | 4.133  |
| 10 | 0.5997 | 8.358  | 7.589  | 6.691  | 20.534 | 15.075 |
| 10 | 0.6007 | 16.444 | 14.609 | 17.717 | 20.078 | 10.261 |
| 10 | 0.6017 | 6.592  | 15.859 | 10.588 | 12.261 | 12.574 |
| 10 | 0.6027 | 12.759 | 15.286 | 14.601 | 23.498 | 17.795 |
| 10 | 0.6037 | 14.187 | 11.962 | 14.702 | 6.923  | 14.486 |
| 10 | 0.6047 | 16.500 | 11.272 | 17.035 | 5.580  | 12.999 |
| 10 | 0.6057 | 18.736 | 17.900 | 24.927 | 5.749  | 17.002 |
| 10 | 0.6067 | 5.280  | 9.115  | 6.292  | 15.132 | 5.813  |
| 10 | 0.6077 | 9.204  | 13.934 | 12.302 | 22.653 | 9.125  |
| 10 | 0.6087 | 9.155  | 10.295 | 11.741 | 15.585 | 21.789 |
| 10 | 0.6097 | 16.333 | 20.428 | 17.964 | 11.188 | 13.741 |
| 10 | 0.6107 | 10.197 | 8.303  | 15.180 | 12.313 | 9.619  |
| 10 | 0.6117 | 13.150 | 9.645  | 12.897 | 5.347  | 13.742 |
| 10 | 0.6127 | 20.029 | 18.378 | 25.626 | 7.604  | 18.246 |
| 10 | 0.6137 | 18.250 | 14.949 | 22.425 | 8.329  | 17.125 |
| 10 | 0.6147 | 14.931 | 11.702 | 14.431 | 9.199  | 21.576 |
| 10 | 0.6157 | 11.694 | 12.923 | 20.258 | 15.891 | 18.350 |
| 10 | 0.6167 | 8.129  | 10.031 | 17.591 | 11.025 | 26.003 |
| 10 | 0.6177 | 8.186  | 10.135 | 17.717 | 11.019 | 25.976 |
| 10 | 0.6187 | 9.064  | 11.262 | 14.097 | 6.075  | 9.911  |
| 10 | 0.6197 | 14.907 | 12.268 | 12.013 | 9.901  | 10.952 |
| 10 | 0.6207 | 24.738 | 16.012 | 25.404 | 9.740  | 12.095 |
| 10 | 0.6217 | 22.602 | 14.718 | 18.768 | 12.812 | 18.036 |
| 10 | 0.6227 | 13.741 | 12.186 | 20.260 | 13.692 | 34.933 |
| 10 | 0.6237 | 9.277  | 14.896 | 18.635 | 6.614  | 9.066  |
| 10 | 0.6247 | 12.979 | 12.556 | 14.896 | 13.795 | 11.161 |
| 10 | 0.6257 | 9.847  | 9.736  | 13.546 | 8.892  | 11.769 |
| 10 | 0.6267 | 13.190 | 9.986  | 15.405 | 9.842  | 14.357 |
| 10 | 0.6277 | 11.957 | 8.144  | 16.628 | 18.691 | 7.721  |
| 10 | 0.6287 | 13.430 | 6.122  | 16.928 | 14.233 | 15.866 |
| 10 | 0.6297 | 9.357  | 8.649  | 11.505 | 13.800 | 18.748 |
| 10 | 0.6307 | 7.393  | 7.077  | 8.479  | 4.777  | 12.552 |
| 10 | 0.6317 | 18.449 | 22.649 | 18.171 | 12.183 | 17.617 |
| 10 | 0.6327 | 8.691  | 6.495  | 7.831  | 10.381 | 8.346  |
| 10 | 0.6337 | 12.550 | 11.092 | 12.448 | 2.742  | 6.647  |

|    |        |        |        |        |        |        |
|----|--------|--------|--------|--------|--------|--------|
| 10 | 0.6347 | 7.995  | 6.249  | 5.614  | 10.619 | 8.734  |
| 10 | 0.6357 | 9.822  | 9.786  | 18.750 | 10.346 | 13.294 |
| 10 | 0.6367 | 12.487 | 9.009  | 17.623 | 13.386 | 13.584 |
| 10 | 0.6377 | 9.509  | 14.776 | 10.601 | 17.382 | 12.480 |
| 10 | 0.6387 | 18.399 | 21.133 | 23.045 | 11.377 | 12.803 |
| 10 | 0.6397 | 8.437  | 10.311 | 15.877 | 11.175 | 12.782 |
| 10 | 0.6407 | 11.572 | 18.661 | 14.753 | 16.970 | 21.032 |
| 10 | 0.6417 | 6.531  | 12.230 | 6.462  | 10.405 | 18.922 |
| 10 | 0.6427 | 12.252 | 21.268 | 14.107 | 10.324 | 24.685 |
| 10 | 0.6437 | 9.070  | 11.607 | 13.415 | 16.044 | 18.397 |
| 10 | 0.6447 | 9.242  | 13.024 | 12.624 | 13.139 | 9.035  |
| 10 | 0.6457 | 17.126 | 12.695 | 21.524 | 5.966  | 14.129 |
| 10 | 0.6467 | 13.367 | 13.797 | 21.826 | 10.491 | 7.427  |
| 10 | 0.6477 | 14.516 | 18.804 | 17.697 | 7.180  | 8.069  |
| 10 | 0.6487 | 9.551  | 16.852 | 13.123 | 26.638 | 18.197 |
| 10 | 0.6497 | 11.698 | 12.536 | 12.084 | 17.166 | 6.761  |
| 10 | 0.6507 | 7.067  | 9.166  | 5.411  | 13.534 | 10.141 |
| 10 | 0.6517 | 16.774 | 15.087 | 15.980 | 7.469  | 7.680  |
| 10 | 0.6527 | 12.338 | 12.601 | 16.848 | 4.053  | 22.562 |
| 10 | 0.6537 | 9.382  | 10.072 | 16.040 | 10.072 | 28.961 |
| 10 | 0.6547 | 5.365  | 10.191 | 8.787  | 13.751 | 24.717 |
| 10 | 0.6557 | 8.336  | 11.760 | 12.899 | 10.994 | 9.548  |
| 10 | 0.6567 | 9.577  | 4.646  | 12.279 | 7.422  | 2.147  |
| 10 | 0.6577 | 11.728 | 10.545 | 13.221 | 17.085 | 14.650 |
| 10 | 0.6587 | 14.271 | 16.394 | 17.350 | 14.208 | 9.269  |
| 10 | 0.6597 | 10.414 | 14.089 | 11.866 | 25.233 | 9.623  |
| 10 | 0.6607 | 8.329  | 13.128 | 9.034  | 10.126 | 11.115 |
| 10 | 0.6617 | 18.890 | 18.105 | 17.117 | 11.813 | 33.114 |
| 10 | 0.6627 | 15.945 | 11.892 | 11.852 | 8.351  | 17.362 |
| 10 | 0.6637 | 9.282  | 8.109  | 7.310  | 10.424 | 14.811 |
| 10 | 0.6647 | 9.296  | 8.135  | 7.349  | 10.478 | 14.770 |
| 10 | 0.6657 | 21.428 | 11.916 | 20.595 | 12.610 | 19.702 |
| 10 | 0.6667 | 20.525 | 12.407 | 20.922 | 9.149  | 6.422  |
| 10 | 0.6677 | 19.062 | 8.306  | 16.335 | 11.782 | 8.278  |
| 10 | 0.6687 | 10.149 | 12.096 | 9.107  | 20.513 | 9.856  |
| 10 | 0.6697 | 12.775 | 18.519 | 22.248 | 17.391 | 17.771 |
| 10 | 0.6707 | 12.773 | 18.528 | 22.262 | 17.264 | 17.681 |
| 10 | 0.6717 | 13.118 | 13.092 | 10.568 | 16.031 | 26.538 |
| 10 | 0.6727 | 15.567 | 18.676 | 15.203 | 21.427 | 26.116 |
| 10 | 0.6737 | 14.025 | 10.467 | 12.818 | 13.291 | 19.201 |
| 10 | 0.6747 | 20.494 | 6.665  | 13.977 | 12.452 | 24.114 |
| 10 | 0.6757 | 10.670 | 10.726 | 10.700 | 16.098 | 21.731 |
| 10 | 0.6767 | 11.087 | 18.791 | 14.174 | 23.440 | 12.227 |
| 10 | 0.6777 | 12.387 | 13.982 | 10.916 | 7.220  | 13.060 |
| 10 | 0.6787 | 12.564 | 11.655 | 13.304 | 7.150  | 6.389  |
| 10 | 0.6797 | 13.221 | 6.992  | 10.642 | 9.410  | 10.368 |
| 10 | 0.6807 | 14.551 | 11.064 | 6.505  | 16.151 | 24.329 |
| 10 | 0.6817 | 9.610  | 11.580 | 8.498  | 23.291 | 29.366 |
| 10 | 0.6827 | 12.653 | 13.226 | 10.723 | 24.994 | 26.858 |
| 10 | 0.6837 | 17.557 | 13.459 | 16.046 | 11.876 | 11.762 |

|    |        |        |        |        |        |        |
|----|--------|--------|--------|--------|--------|--------|
| 10 | 0.6847 | 15.770 | 14.819 | 17.229 | 8.896  | 4.998  |
| 10 | 0.6857 | 10.984 | 12.470 | 10.728 | 11.334 | 23.511 |
| 10 | 0.6867 | 7.559  | 5.815  | 4.910  | 5.129  | 25.904 |
| 10 | 0.6877 | 14.754 | 13.439 | 8.306  | 12.034 | 23.695 |
| 10 | 0.6887 | 16.450 | 15.100 | 13.343 | 18.597 | 15.177 |
| 10 | 0.6897 | 10.729 | 12.904 | 7.673  | 15.125 | 10.503 |
| 10 | 0.6907 | 6.625  | 9.067  | 10.249 | 5.118  | 6.228  |
| 10 | 0.6917 | 3.588  | 3.987  | 4.603  | 4.701  | 1.789  |
| 10 | 0.6927 | 14.837 | 13.639 | 10.365 | 7.586  | 8.603  |
| 10 | 0.6937 | 10.980 | 7.839  | 6.971  | 14.356 | 17.321 |
| 10 | 0.6947 | 11.932 | 13.137 | 12.718 | 14.599 | 17.589 |
| 10 | 0.6957 | 16.943 | 11.956 | 12.530 | 11.503 | 18.916 |
| 10 | 0.6967 | 10.609 | 7.434  | 9.460  | 12.510 | 11.489 |
| 10 | 0.6977 | 12.356 | 8.601  | 6.505  | 13.138 | 11.093 |
| 10 | 0.6987 | 12.190 | 7.985  | 20.544 | 10.540 | 16.123 |
| 10 | 0.6997 | 17.628 | 17.440 | 20.680 | 16.216 | 19.364 |
| 10 | 0.7007 | 18.224 | 15.104 | 20.329 | 15.216 | 20.922 |
| 10 | 0.7017 | 28.542 | 11.413 | 12.830 | 19.475 | 23.152 |
| 10 | 0.7027 | 5.281  | 6.232  | 6.315  | 19.993 | 13.025 |
| 10 | 0.7037 | 5.240  | 12.240 | 6.279  | 17.238 | 8.518  |
| 10 | 0.7047 | 5.824  | 8.660  | 2.428  | 24.559 | 12.371 |
| 10 | 0.7057 | 11.716 | 12.556 | 7.113  | 9.668  | 15.803 |
| 10 | 0.7067 | 9.238  | 9.450  | 7.399  | 16.027 | 12.476 |
| 10 | 0.7077 | 6.359  | 11.465 | 8.386  | 17.529 | 15.962 |
| 10 | 0.7087 | 19.989 | 10.262 | 9.211  | 7.832  | 12.078 |
| 10 | 0.7097 | 29.586 | 11.780 | 17.975 | 18.035 | 16.086 |
| 10 | 0.7107 | 12.854 | 7.779  | 6.691  | 19.670 | 18.636 |
| 10 | 0.7117 | 9.130  | 9.949  | 10.869 | 4.872  | 15.571 |
| 10 | 0.7127 | 5.932  | 7.063  | 6.869  | 5.257  | 8.862  |
| 10 | 0.7137 | 22.544 | 15.738 | 23.609 | 8.826  | 21.246 |
| 10 | 0.7147 | 20.221 | 16.312 | 21.168 | 7.753  | 6.454  |
| 10 | 0.7157 | 14.316 | 23.662 | 18.813 | 11.955 | 19.159 |
| 10 | 0.7167 | 6.911  | 4.616  | 7.220  | 14.157 | 22.093 |
| 10 | 0.7177 | 16.076 | 19.729 | 18.770 | 7.241  | 14.893 |
| 10 | 0.7187 | 16.150 | 19.739 | 18.806 | 7.276  | 14.915 |
| 10 | 0.7197 | 16.491 | 16.414 | 19.318 | 10.433 | 17.510 |
| 10 | 0.7207 | 16.572 | 13.402 | 11.780 | 6.040  | 7.450  |
| 10 | 0.7217 | 9.556  | 7.904  | 8.848  | 6.910  | 13.857 |
| 10 | 0.7227 | 21.568 | 7.305  | 17.886 | 16.247 | 21.035 |
| 10 | 0.7237 | 10.986 | 8.063  | 10.469 | 17.087 | 8.313  |
| 10 | 0.7247 | 8.939  | 13.837 | 11.678 | 6.893  | 16.250 |
| 10 | 0.7257 | 7.764  | 8.223  | 7.705  | 10.288 | 30.418 |
| 10 | 0.7267 | 9.932  | 5.963  | 7.020  | 10.171 | 17.015 |
| 10 | 0.7277 | 9.243  | 5.045  | 4.636  | 11.011 | 12.532 |
| 10 | 0.7287 | 8.982  | 14.386 | 12.569 | 14.740 | 18.547 |
| 10 | 0.7297 | 21.425 | 14.750 | 14.900 | 14.207 | 19.808 |
| 10 | 0.7307 | 12.187 | 9.282  | 14.373 | 5.459  | 30.087 |
| 10 | 0.7317 | 11.390 | 12.653 | 13.311 | 6.951  | 13.345 |
| 10 | 0.7327 | 17.131 | 10.562 | 13.010 | 10.555 | 17.431 |
| 10 | 0.7337 | 17.122 | 20.568 | 24.080 | 10.845 | 26.494 |



|    |        |        |        |        |        |        |
|----|--------|--------|--------|--------|--------|--------|
| 10 | 0.7347 | 16.704 | 9.537  | 18.683 | 4.666  | 22.006 |
| 10 | 0.7357 | 9.636  | 2.040  | 3.681  | 5.581  | 23.382 |
| 10 | 0.7367 | 25.336 | 12.520 | 13.009 | 11.260 | 21.548 |
| 10 | 0.7377 | 12.310 | 3.936  | 4.698  | 9.125  | 13.281 |
| 10 | 0.7387 | 16.314 | 10.786 | 12.307 | 7.411  | 10.780 |
| 10 | 0.7397 | 14.044 | 9.446  | 8.192  | 5.795  | 14.092 |
| 10 | 0.7407 | 21.125 | 12.520 | 13.486 | 11.508 | 26.630 |
| 10 | 0.7417 | 16.585 | 8.073  | 16.414 | 9.095  | 24.279 |
| 10 | 0.7427 | 14.882 | 9.167  | 9.719  | 18.776 | 34.983 |
| 10 | 0.7437 | 15.131 | 12.443 | 13.120 | 14.354 | 21.153 |
| 10 | 0.7447 | 11.593 | 9.439  | 15.269 | 9.593  | 25.375 |
| 10 | 0.7457 | 12.260 | 5.369  | 6.357  | 7.399  | 11.647 |
| 10 | 0.7467 | 16.275 | 5.774  | 7.336  | 13.276 | 15.896 |
| 10 | 0.7477 | 9.872  | 3.109  | 5.771  | 12.822 | 35.716 |
| 10 | 0.7487 | 5.945  | 1.855  | 3.138  | 4.591  | 13.316 |
| 10 | 0.7497 | 14.615 | 7.799  | 12.177 | 15.964 | 24.189 |
| 10 | 0.7507 | 7.467  | 4.003  | 4.721  | 11.694 | 18.102 |
| 10 | 0.7517 | 13.235 | 17.733 | 10.228 | 18.355 | 23.681 |
| 10 | 0.7527 | 10.794 | 10.911 | 9.616  | 14.728 | 19.841 |
| 10 | 0.7537 | 13.811 | 11.948 | 13.454 | 6.249  | 11.251 |
| 10 | 0.7547 | 5.784  | 8.787  | 8.261  | 6.804  | 8.437  |
| 10 | 0.7557 | 9.653  | 15.067 | 9.359  | 11.935 | 13.163 |
| 10 | 0.7567 | 9.374  | 9.658  | 10.548 | 10.420 | 12.182 |
| 10 | 0.7577 | 24.817 | 17.341 | 20.313 | 12.000 | 16.127 |
| 10 | 0.7587 | 22.563 | 16.880 | 15.682 | 13.071 | 20.412 |
| 10 | 0.7597 | 9.232  | 8.292  | 9.697  | 9.745  | 12.090 |
| 10 | 0.7607 | 15.954 | 13.163 | 10.204 | 21.806 | 18.071 |
| 10 | 0.7617 | 22.834 | 18.426 | 11.555 | 8.092  | 8.345  |
| 10 | 0.7627 | 16.201 | 18.221 | 20.635 | 22.516 | 12.459 |
| 10 | 0.7637 | 15.191 | 7.446  | 9.793  | 6.580  | 12.937 |
| 10 | 0.7647 | 6.337  | 5.363  | 4.467  | 6.677  | 18.596 |
| 10 | 0.7657 | 5.273  | 11.326 | 5.099  | 24.670 | 22.934 |
| 10 | 0.7667 | 18.449 | 5.778  | 11.106 | 19.245 | 18.097 |
| 10 | 0.7677 | 22.990 | 23.090 | 19.320 | 14.629 | 24.215 |
| 10 | 0.7687 | 28.589 | 21.361 | 23.126 | 17.646 | 16.029 |
| 10 | 0.7697 | 7.378  | 9.932  | 5.897  | 21.457 | 17.926 |
| 10 | 0.7707 | 21.609 | 25.697 | 15.641 | 21.805 | 19.453 |
| 10 | 0.7717 | 11.034 | 13.527 | 9.269  | 16.863 | 18.994 |
| 10 | 0.7727 | 7.181  | 6.091  | 5.838  | 8.060  | 7.949  |
| 10 | 0.7737 | 17.502 | 13.129 | 19.164 | 16.661 | 13.841 |
| 10 | 0.7747 | 38.455 | 32.031 | 37.788 | 12.071 | 15.907 |
| 10 | 0.7757 | 29.318 | 29.574 | 29.225 | 11.242 | 15.579 |
| 10 | 0.7767 | 16.533 | 17.170 | 16.798 | 11.097 | 17.568 |
| 10 | 0.7777 | 17.074 | 16.510 | 16.541 | 10.340 | 24.123 |
| 10 | 0.7787 | 20.877 | 21.757 | 20.173 | 9.214  | 18.656 |
| 10 | 0.7797 | 22.180 | 22.162 | 19.884 | 13.569 | 10.886 |
| 10 | 0.7807 | 27.902 | 22.189 | 17.930 | 22.764 | 20.352 |
| 10 | 0.7817 | 21.651 | 16.750 | 19.836 | 23.649 | 9.795  |
| 10 | 0.7827 | 21.584 | 16.741 | 19.789 | 23.521 | 9.739  |
| 10 | 0.7837 | 17.770 | 15.232 | 14.089 | 8.485  | 15.664 |

|    |        |        |        |        |        |        |
|----|--------|--------|--------|--------|--------|--------|
| 10 | 0.7847 | 5.086  | 5.206  | 3.945  | 13.783 | 10.746 |
| 10 | 0.7857 | 5.157  | 6.204  | 4.382  | 8.524  | 12.075 |
| 10 | 0.7867 | 9.784  | 9.465  | 5.841  | 8.648  | 21.581 |
| 10 | 0.7877 | 17.944 | 11.657 | 11.595 | 16.217 | 30.599 |
| 10 | 0.7887 | 25.377 | 15.964 | 16.696 | 16.050 | 24.911 |
| 10 | 0.7897 | 25.375 | 15.970 | 16.704 | 15.991 | 24.913 |
| 10 | 0.7907 | 21.191 | 23.944 | 19.779 | 14.866 | 16.245 |
| 10 | 0.7917 | 7.856  | 15.202 | 10.200 | 17.912 | 15.999 |
| 10 | 0.7927 | 11.607 | 9.581  | 11.859 | 7.565  | 10.777 |
| 10 | 0.7937 | 26.236 | 24.122 | 16.137 | 24.825 | 20.701 |
| 10 | 0.7947 | 18.176 | 17.944 | 14.728 | 13.681 | 12.860 |
| 10 | 0.7957 | 7.608  | 9.713  | 7.726  | 16.170 | 14.470 |
| 10 | 0.7967 | 2.573  | 4.469  | 3.391  | 13.887 | 19.142 |
| 10 | 0.7977 | 9.784  | 7.206  | 10.636 | 7.469  | 25.169 |
| 10 | 0.7987 | 17.116 | 17.071 | 20.256 | 14.384 | 10.047 |
| 10 | 0.7997 | 23.380 | 14.975 | 16.125 | 12.628 | 14.092 |
| 10 | 0.8007 | 10.090 | 13.272 | 12.951 | 13.963 | 8.435  |
| 10 | 0.8017 | 14.122 | 16.348 | 13.692 | 11.491 | 17.757 |
| 10 | 0.8027 | 16.725 | 13.769 | 15.239 | 7.696  | 12.516 |
| 10 | 0.8037 | 16.290 | 17.012 | 9.493  | 12.897 | 17.845 |
| 10 | 0.8047 | 14.950 | 15.442 | 13.184 | 7.021  | 15.324 |
| 10 | 0.8057 | 13.794 | 18.727 | 12.647 | 13.689 | 20.002 |
| 10 | 0.8067 | 5.012  | 6.575  | 4.454  | 6.732  | 6.107  |
| 10 | 0.8077 | 8.576  | 7.510  | 13.005 | 15.949 | 11.905 |
| 10 | 0.8087 | 4.311  | 6.212  | 5.513  | 13.424 | 4.409  |
| 10 | 0.8097 | 6.638  | 6.088  | 5.246  | 5.348  | 5.783  |
| 10 | 0.8107 | 12.279 | 12.092 | 10.958 | 10.129 | 11.522 |
| 10 | 0.8117 | 16.840 | 16.646 | 14.323 | 14.920 | 15.815 |
| 10 | 0.8127 | 16.922 | 19.293 | 17.170 | 14.663 | 16.001 |
| 10 | 0.8137 | 11.906 | 10.070 | 11.945 | 8.953  | 15.969 |
| 10 | 0.8147 | 4.524  | 12.562 | 8.166  | 13.067 | 9.762  |
| 10 | 0.8157 | 7.949  | 8.710  | 9.949  | 5.650  | 8.037  |
| 10 | 0.8167 | 13.521 | 9.494  | 11.360 | 14.015 | 31.760 |
| 10 | 0.8177 | 11.988 | 8.164  | 13.515 | 6.534  | 12.406 |
| 10 | 0.8187 | 17.756 | 14.183 | 17.100 | 10.865 | 14.156 |
| 10 | 0.8197 | 10.673 | 8.175  | 7.723  | 11.088 | 15.557 |
| 10 | 0.8207 | 6.718  | 5.760  | 8.645  | 13.856 | 12.087 |
| 10 | 0.8217 | 6.698  | 5.727  | 8.656  | 13.855 | 12.027 |
| 10 | 0.8227 | 7.622  | 9.070  | 7.669  | 10.363 | 20.491 |
| 10 | 0.8237 | 8.163  | 8.893  | 12.630 | 19.641 | 23.813 |
| 10 | 0.8247 | 8.148  | 8.889  | 12.611 | 19.606 | 23.796 |
| 10 | 0.8257 | 4.808  | 2.239  | 6.414  | 9.169  | 9.919  |
| 10 | 0.8267 | 12.895 | 8.401  | 12.898 | 3.199  | 9.380  |
| 10 | 0.8277 | 5.091  | 9.147  | 9.174  | 13.463 | 8.510  |
| 10 | 0.8287 | 11.899 | 15.804 | 13.504 | 21.973 | 12.285 |
| 10 | 0.8297 | 8.785  | 6.622  | 6.559  | 14.425 | 18.312 |
| 10 | 0.8307 | 6.201  | 4.914  | 6.057  | 13.166 | 12.968 |
| 10 | 0.8317 | 8.601  | 10.192 | 11.164 | 20.462 | 19.360 |
| 10 | 0.8327 | 12.700 | 8.518  | 12.686 | 13.449 | 19.384 |
| 10 | 0.8337 | 5.497  | 7.503  | 5.010  | 12.416 | 9.416  |

|    |        |        |        |        |        |        |
|----|--------|--------|--------|--------|--------|--------|
| 10 | 0.8347 | 10.053 | 16.075 | 12.008 | 10.714 | 19.192 |
| 10 | 0.8357 | 10.413 | 12.075 | 12.802 | 12.891 | 16.009 |
| 10 | 0.8367 | 8.110  | 16.913 | 11.331 | 22.318 | 9.960  |
| 10 | 0.8377 | 12.132 | 18.350 | 21.678 | 17.115 | 9.029  |
| 10 | 0.8387 | 11.437 | 12.378 | 10.306 | 16.785 | 11.992 |
| 10 | 0.8397 | 18.920 | 15.085 | 15.212 | 13.990 | 16.711 |
| 10 | 0.8407 | 8.605  | 9.987  | 11.157 | 14.520 | 27.020 |
| 10 | 0.8417 | 10.991 | 16.984 | 14.219 | 19.218 | 25.572 |
| 10 | 0.8427 | 14.684 | 11.881 | 12.466 | 19.507 | 19.194 |
| 10 | 0.8437 | 13.318 | 9.948  | 11.815 | 13.936 | 18.230 |
| 10 | 0.8447 | 14.808 | 11.550 | 11.674 | 8.236  | 23.177 |
| 10 | 0.8457 | 18.025 | 9.943  | 9.026  | 11.017 | 16.954 |
| 10 | 0.8467 | 11.087 | 6.630  | 5.686  | 10.828 | 17.076 |
| 10 | 0.8477 | 14.544 | 13.403 | 9.345  | 15.743 | 15.956 |
| 10 | 0.8487 | 14.507 | 13.365 | 11.053 | 21.502 | 12.747 |
| 10 | 0.8497 | 8.149  | 9.635  | 7.147  | 16.681 | 13.099 |
| 10 | 0.8507 | 21.328 | 14.155 | 19.094 | 23.227 | 12.308 |
| 10 | 0.8517 | 23.419 | 12.993 | 19.162 | 20.368 | 14.043 |
| 10 | 0.8527 | 24.072 | 14.035 | 22.667 | 18.999 | 13.018 |
| 10 | 0.8537 | 18.054 | 9.162  | 17.256 | 16.795 | 16.396 |
| 10 | 0.8547 | 17.060 | 14.046 | 11.715 | 19.484 | 12.668 |
| 10 | 0.8557 | 24.756 | 26.122 | 20.010 | 21.167 | 22.875 |
| 10 | 0.8567 | 18.420 | 13.127 | 11.587 | 24.973 | 29.373 |
| 10 | 0.8577 | 10.002 | 10.539 | 5.419  | 14.322 | 32.358 |
| 10 | 0.8587 | 15.469 | 8.770  | 11.286 | 14.675 | 28.529 |
| 10 | 0.8597 | 21.558 | 13.042 | 12.201 | 21.870 | 22.805 |
| 10 | 0.8607 | 22.343 | 14.369 | 14.253 | 17.264 | 20.631 |
| 10 | 0.8617 | 26.404 | 19.810 | 23.645 | 9.677  | 11.030 |
| 10 | 0.8627 | 16.629 | 22.714 | 13.736 | 13.214 | 21.287 |
| 10 | 0.8637 | 9.856  | 13.276 | 10.330 | 10.128 | 13.029 |
| 10 | 0.8647 | 26.231 | 22.729 | 19.932 | 19.605 | 20.304 |
| 10 | 0.8657 | 19.417 | 18.607 | 14.257 | 26.353 | 21.255 |
| 10 | 0.8667 | 19.402 | 13.721 | 15.154 | 27.183 | 29.622 |
| 10 | 0.8677 | 20.848 | 16.711 | 16.145 | 24.898 | 33.670 |
| 10 | 0.8687 | 16.759 | 20.617 | 11.280 | 36.014 | 24.873 |
| 10 | 0.8697 | 22.600 | 22.597 | 16.860 | 23.742 | 22.763 |
| 10 | 0.8707 | 30.763 | 28.183 | 23.214 | 22.556 | 17.335 |
| 10 | 0.8717 | 17.120 | 19.160 | 21.848 | 25.537 | 18.688 |
| 10 | 0.8727 | 12.756 | 26.761 | 15.397 | 31.851 | 34.161 |
| 10 | 0.8737 | 21.748 | 23.579 | 12.950 | 36.661 | 32.266 |
| 10 | 0.8747 | 27.237 | 30.200 | 19.194 | 33.864 | 29.627 |
| 10 | 0.8757 | 16.738 | 12.107 | 11.396 | 27.903 | 43.932 |
| 10 | 0.8767 | 24.717 | 14.968 | 17.262 | 16.032 | 13.253 |
| 10 | 0.8777 | 39.310 | 20.166 | 28.703 | 25.349 | 20.450 |
| 10 | 0.8787 | 10.029 | 11.092 | 9.243  | 21.889 | 26.355 |
| 10 | 0.8797 | 16.317 | 13.668 | 12.715 | 17.688 | 12.430 |
| 10 | 0.8807 | 7.166  | 5.290  | 11.022 | 4.906  | 4.266  |
| 10 | 0.8817 | 10.490 | 8.397  | 10.147 | 17.049 | 14.526 |
| 10 | 0.8827 | 7.058  | 5.179  | 7.152  | 8.620  | 11.403 |
| 10 | 0.8837 | 12.437 | 10.017 | 12.160 | 12.455 | 25.828 |

|    |        |        |        |        |        |        |
|----|--------|--------|--------|--------|--------|--------|
| 10 | 0.8847 | 10.932 | 9.097  | 10.816 | 10.964 | 26.623 |
| 10 | 0.8857 | 8.637  | 6.888  | 8.919  | 3.594  | 6.489  |
| 10 | 0.8867 | 5.905  | 9.465  | 6.496  | 6.182  | 10.000 |
| 10 | 0.8877 | 6.933  | 14.586 | 8.832  | 21.493 | 24.947 |
| 10 | 0.8887 | 12.336 | 15.588 | 12.635 | 23.721 | 28.595 |
| 10 | 0.8897 | 21.562 | 6.697  | 14.338 | 22.801 | 10.743 |
| 10 | 0.8907 | 19.087 | 5.673  | 11.575 | 24.520 | 13.576 |
| 10 | 0.8917 | 21.157 | 12.189 | 17.581 | 13.132 | 23.902 |
| 10 | 0.8927 | 23.640 | 15.141 | 18.189 | 12.968 | 23.595 |
| 10 | 0.8937 | 20.136 | 11.648 | 12.991 | 14.479 | 23.714 |
| 10 | 0.8947 | 16.395 | 15.915 | 18.322 | 11.111 | 19.088 |
| 10 | 0.8957 | 21.467 | 12.907 | 16.470 | 16.452 | 13.548 |
| 10 | 0.8967 | 17.251 | 10.292 | 9.168  | 12.726 | 13.746 |
| 10 | 0.8977 | 23.749 | 11.860 | 16.487 | 23.509 | 16.271 |
| 10 | 0.8987 | 13.050 | 17.608 | 16.237 | 21.114 | 21.968 |
| 10 | 0.8997 | 14.841 | 14.052 | 15.834 | 17.713 | 14.116 |
| 10 | 0.9007 | 14.844 | 14.043 | 15.817 | 17.712 | 14.108 |
| 10 | 0.9017 | 13.507 | 13.734 | 10.840 | 12.122 | 13.288 |
| 10 | 0.9027 | 9.504  | 6.746  | 4.201  | 26.866 | 13.946 |
| 10 | 0.9037 | 24.157 | 15.662 | 18.863 | 20.646 | 27.021 |
| 10 | 0.9047 | 24.457 | 19.557 | 19.156 | 16.026 | 18.441 |
| 10 | 0.9057 | 15.548 | 11.142 | 14.901 | 21.006 | 16.109 |
| 10 | 0.9067 | 15.153 | 9.706  | 16.285 | 8.882  | 12.215 |
| 10 | 0.9077 | 13.979 | 7.295  | 13.512 | 11.670 | 7.655  |
| 10 | 0.9087 | 13.947 | 7.282  | 13.538 | 11.724 | 7.606  |
| 10 | 0.9097 | 5.440  | 9.890  | 7.149  | 16.314 | 9.880  |
| 10 | 0.9107 | 11.633 | 11.550 | 10.563 | 14.982 | 17.055 |
| 10 | 0.9117 | 21.604 | 20.598 | 20.220 | 16.599 | 10.666 |
| 10 | 0.9127 | 7.227  | 8.817  | 10.985 | 11.837 | 13.719 |
| 10 | 0.9137 | 13.951 | 14.737 | 14.605 | 15.689 | 17.992 |
| 10 | 0.9147 | 17.962 | 16.384 | 17.813 | 15.531 | 15.186 |
| 10 | 0.9157 | 18.549 | 9.062  | 17.244 | 13.521 | 11.563 |
| 10 | 0.9167 | 10.462 | 11.893 | 10.433 | 10.934 | 11.843 |
| 10 | 0.9177 | 11.354 | 13.460 | 12.563 | 14.221 | 8.243  |
| 10 | 0.9187 | 8.577  | 11.960 | 6.939  | 15.847 | 6.511  |
| 10 | 0.9197 | 7.246  | 17.080 | 11.187 | 14.956 | 6.681  |
| 10 | 0.9207 | 16.271 | 26.968 | 22.292 | 14.531 | 15.311 |
| 10 | 0.9217 | 13.033 | 16.517 | 19.658 | 4.731  | 13.380 |
| 10 | 0.9227 | 5.451  | 6.639  | 6.831  | 8.566  | 8.204  |
| 10 | 0.9237 | 11.443 | 12.768 | 14.702 | 13.585 | 17.838 |
| 10 | 0.9247 | 18.618 | 12.071 | 9.081  | 21.862 | 15.508 |
| 10 | 0.9257 | 34.179 | 26.364 | 35.814 | 14.203 | 11.131 |
| 10 | 0.9267 | 34.186 | 26.365 | 35.811 | 14.164 | 11.139 |
| 10 | 0.9277 | 18.138 | 18.214 | 16.202 | 5.633  | 9.433  |
| 10 | 0.9287 | 13.670 | 20.399 | 15.101 | 16.243 | 12.033 |
| 10 | 0.9297 | 13.816 | 23.860 | 18.355 | 19.079 | 9.909  |
| 10 | 0.9307 | 12.147 | 22.844 | 15.481 | 19.921 | 8.214  |
| 10 | 0.9317 | 14.235 | 16.166 | 16.958 | 16.748 | 8.589  |
| 10 | 0.9327 | 5.466  | 9.291  | 8.132  | 3.915  | 12.170 |
| 10 | 0.9337 | 6.995  | 11.563 | 12.002 | 13.362 | 7.497  |

|    |        |        |        |        |        |        |
|----|--------|--------|--------|--------|--------|--------|
| 10 | 0.9347 | 9.019  | 14.235 | 10.908 | 12.828 | 11.524 |
| 10 | 0.9357 | 5.287  | 6.835  | 7.951  | 14.367 | 7.409  |
| 10 | 0.9367 | 9.530  | 11.638 | 10.391 | 18.561 | 21.404 |
| 10 | 0.9377 | 11.459 | 11.684 | 10.061 | 12.772 | 12.252 |
| 10 | 0.9387 | 12.024 | 9.426  | 9.071  | 16.174 | 11.767 |
| 10 | 0.9397 | 14.649 | 15.763 | 15.036 | 17.074 | 24.169 |
| 10 | 0.9407 | 15.106 | 9.621  | 9.904  | 17.788 | 14.743 |
| 10 | 0.9417 | 20.025 | 19.461 | 16.470 | 14.913 | 13.629 |
| 10 | 0.9427 | 10.907 | 12.901 | 9.406  | 13.654 | 12.740 |
| 10 | 0.9437 | 17.562 | 12.508 | 9.116  | 14.880 | 15.384 |
| 10 | 0.9447 | 21.445 | 31.843 | 21.212 | 26.484 | 16.925 |
| 10 | 0.9457 | 20.036 | 21.732 | 14.215 | 21.770 | 9.198  |
| 10 | 0.9467 | 9.306  | 12.335 | 8.675  | 15.870 | 18.930 |
| 10 | 0.9477 | 17.605 | 15.878 | 17.140 | 8.896  | 23.666 |
| 10 | 0.9487 | 11.856 | 17.770 | 18.402 | 14.149 | 14.090 |
| 10 | 0.9497 | 9.466  | 23.917 | 13.753 | 19.818 | 6.201  |
| 10 | 0.9507 | 41.472 | 35.529 | 23.587 | 26.382 | 22.265 |
| 10 | 0.9517 | 17.507 | 26.418 | 22.088 | 26.084 | 15.222 |
| 10 | 0.9527 | 7.958  | 12.839 | 12.057 | 23.335 | 11.991 |
| 10 | 0.9537 | 10.629 | 11.976 | 9.090  | 16.958 | 11.798 |
| 10 | 0.9547 | 5.964  | 6.211  | 5.897  | 17.122 | 17.445 |
| 10 | 0.9557 | 16.174 | 32.056 | 20.598 | 24.555 | 16.512 |
| 10 | 0.9567 | 8.269  | 10.814 | 6.039  | 32.602 | 21.138 |
| 10 | 0.9577 | 11.359 | 15.735 | 10.223 | 16.317 | 18.578 |
| 10 | 0.9587 | 12.419 | 10.569 | 13.734 | 12.392 | 15.919 |
| 10 | 0.9597 | 21.350 | 20.479 | 20.057 | 21.938 | 10.194 |
| 10 | 0.9607 | 28.734 | 21.630 | 18.487 | 18.892 | 17.234 |
| 10 | 0.9617 | 18.843 | 18.129 | 14.860 | 20.225 | 12.124 |
| 10 | 0.9627 | 19.452 | 14.575 | 10.775 | 21.191 | 11.373 |
| 10 | 0.9637 | 12.238 | 8.966  | 4.037  | 17.130 | 11.481 |
| 10 | 0.9647 | 12.783 | 12.223 | 9.076  | 24.801 | 21.163 |
| 10 | 0.9657 | 12.500 | 19.514 | 14.061 | 17.834 | 22.752 |
| 10 | 0.9667 | 19.612 | 28.096 | 10.392 | 22.130 | 16.561 |
| 10 | 0.9677 | 11.128 | 17.800 | 15.954 | 20.295 | 16.596 |
| 10 | 0.9687 | 8.051  | 10.767 | 5.008  | 19.298 | 19.084 |
| 10 | 0.9697 | 34.869 | 20.974 | 19.410 | 13.028 | 18.506 |
| 10 | 0.9707 | 18.603 | 17.472 | 14.721 | 13.487 | 19.232 |
| 10 | 0.9717 | 15.740 | 23.964 | 12.504 | 24.412 | 13.573 |
| 10 | 0.9727 | 9.511  | 17.582 | 7.220  | 16.262 | 14.910 |
| 10 | 0.9737 | 15.782 | 22.733 | 15.910 | 23.722 | 21.035 |
| 10 | 0.9747 | 16.518 | 18.947 | 22.280 | 16.551 | 20.814 |
| 10 | 0.9757 | 8.609  | 16.286 | 7.405  | 21.498 | 28.263 |
| 10 | 0.9767 | 9.186  | 14.602 | 12.773 | 14.811 | 12.805 |
| 10 | 0.9777 | 13.592 | 19.657 | 10.860 | 15.606 | 13.129 |
| 10 | 0.9787 | 9.638  | 17.892 | 11.767 | 14.593 | 7.402  |
| 10 | 0.9797 | 11.182 | 21.310 | 11.958 | 19.869 | 12.394 |
| 10 | 0.9807 | 9.770  | 19.675 | 12.963 | 26.980 | 11.397 |
| 10 | 0.9817 | 11.665 | 14.777 | 15.353 | 15.093 | 21.919 |
| 10 | 0.9827 | 9.606  | 15.767 | 13.177 | 21.026 | 14.535 |
| 10 | 0.9837 | 12.460 | 17.649 | 10.345 | 21.343 | 25.728 |

|    |        |        |        |        |        |        |
|----|--------|--------|--------|--------|--------|--------|
| 10 | 0.9847 | 6.286  | 15.918 | 11.005 | 14.797 | 12.898 |
| 10 | 0.9857 | 5.393  | 12.605 | 10.089 | 17.891 | 15.304 |
| 10 | 0.9867 | 2.814  | 6.161  | 5.682  | 13.622 | 19.610 |
| 10 | 0.9877 | 10.123 | 9.862  | 7.154  | 11.363 | 12.691 |
| 10 | 0.9887 | 6.892  | 17.859 | 9.939  | 16.736 | 8.925  |
| 10 | 0.9897 | 0.000  | 0.000  | 0.000  | 0.000  | 0.000  |
| 11 | 0.0020 | 0.000  | 0.000  | 0.000  | 0.000  | 0.000  |
| 11 | 0.0030 | 6.164  | 5.229  | 7.360  | 4.997  | 9.739  |
| 11 | 0.0040 | 13.844 | 7.676  | 11.278 | 13.218 | 19.586 |
| 11 | 0.0050 | 10.230 | 8.648  | 9.066  | 5.601  | 13.438 |
| 11 | 0.0060 | 12.425 | 8.286  | 12.347 | 7.377  | 10.684 |
| 11 | 0.0070 | 19.110 | 10.845 | 15.420 | 8.281  | 15.528 |
| 11 | 0.0080 | 9.451  | 4.367  | 4.142  | 7.694  | 12.903 |
| 11 | 0.0090 | 9.473  | 5.772  | 9.354  | 9.263  | 13.495 |
| 11 | 0.0100 | 11.850 | 9.677  | 19.125 | 13.412 | 10.278 |
| 11 | 0.0110 | 7.240  | 9.763  | 12.536 | 13.790 | 34.930 |
| 11 | 0.0120 | 9.375  | 12.322 | 15.840 | 12.576 | 17.308 |
| 11 | 0.0130 | 12.489 | 13.779 | 10.774 | 10.466 | 5.540  |
| 11 | 0.0140 | 14.454 | 9.059  | 11.786 | 6.785  | 5.495  |
| 11 | 0.0150 | 14.450 | 9.039  | 11.788 | 6.736  | 5.453  |
| 11 | 0.0160 | 11.239 | 6.756  | 8.482  | 11.919 | 8.120  |
| 11 | 0.0170 | 9.429  | 11.363 | 10.226 | 11.574 | 12.395 |
| 11 | 0.0180 | 15.297 | 21.267 | 17.303 | 22.816 | 20.182 |
| 11 | 0.0190 | 12.827 | 9.848  | 10.305 | 10.928 | 11.229 |
| 11 | 0.0200 | 9.043  | 10.196 | 11.144 | 16.547 | 16.712 |
| 11 | 0.0210 | 11.866 | 15.791 | 13.219 | 20.915 | 13.266 |
| 11 | 0.0220 | 11.419 | 9.735  | 8.514  | 16.901 | 11.749 |
| 11 | 0.0230 | 8.468  | 15.670 | 17.624 | 6.059  | 6.396  |
| 11 | 0.0240 | 12.314 | 9.913  | 17.534 | 6.695  | 10.152 |
| 11 | 0.0250 | 13.250 | 10.372 | 18.401 | 11.857 | 8.923  |
| 11 | 0.0260 | 17.597 | 18.959 | 20.305 | 11.691 | 19.428 |
| 11 | 0.0270 | 9.539  | 12.543 | 11.652 | 17.973 | 15.980 |
| 11 | 0.0280 | 11.811 | 7.153  | 9.017  | 5.134  | 7.574  |
| 11 | 0.0290 | 13.927 | 10.045 | 11.952 | 5.725  | 7.849  |
| 11 | 0.0300 | 31.396 | 14.257 | 23.151 | 12.843 | 7.953  |
| 11 | 0.0310 | 34.220 | 17.275 | 30.964 | 14.363 | 15.963 |
| 11 | 0.0320 | 17.495 | 11.249 | 13.234 | 8.359  | 13.519 |
| 11 | 0.0330 | 13.266 | 5.355  | 3.730  | 18.122 | 17.055 |
| 11 | 0.0340 | 11.860 | 7.696  | 6.023  | 14.386 | 16.483 |
| 11 | 0.0350 | 3.270  | 7.380  | 3.551  | 8.054  | 5.875  |
| 11 | 0.0360 | 3.280  | 7.410  | 3.552  | 7.965  | 5.847  |
| 11 | 0.0370 | 2.765  | 2.585  | 1.815  | 5.737  | 3.227  |
| 11 | 0.0380 | 6.230  | 9.704  | 12.850 | 13.385 | 13.607 |
| 11 | 0.0390 | 11.140 | 17.132 | 18.795 | 13.773 | 9.000  |
| 11 | 0.0400 | 12.743 | 12.193 | 19.825 | 8.262  | 16.159 |
| 11 | 0.0410 | 10.292 | 14.751 | 18.658 | 12.384 | 15.124 |
| 11 | 0.0420 | 9.696  | 9.611  | 9.396  | 12.866 | 9.911  |
| 11 | 0.0430 | 13.969 | 17.194 | 19.608 | 16.838 | 16.606 |
| 11 | 0.0440 | 11.002 | 20.537 | 22.008 | 7.956  | 11.229 |
| 11 | 0.0450 | 8.788  | 13.397 | 11.939 | 16.639 | 13.187 |

|    |        |        |        |        |        |        |
|----|--------|--------|--------|--------|--------|--------|
| 11 | 0.0460 | 4.889  | 8.441  | 8.915  | 8.121  | 8.583  |
| 11 | 0.0470 | 8.552  | 9.343  | 13.498 | 10.904 | 15.235 |
| 11 | 0.0480 | 9.261  | 7.133  | 7.198  | 7.165  | 13.693 |
| 11 | 0.0490 | 10.430 | 11.341 | 11.079 | 7.709  | 4.964  |
| 11 | 0.0500 | 4.167  | 10.915 | 10.909 | 19.575 | 16.273 |
| 11 | 0.0510 | 4.459  | 8.337  | 10.017 | 13.115 | 17.307 |
| 11 | 0.0520 | 10.674 | 11.854 | 11.705 | 9.794  | 11.529 |
| 11 | 0.0530 | 8.592  | 10.027 | 9.994  | 14.078 | 18.644 |
| 11 | 0.0540 | 11.496 | 7.358  | 10.471 | 12.818 | 17.869 |
| 11 | 0.0550 | 8.528  | 5.049  | 6.693  | 10.861 | 27.334 |
| 11 | 0.0560 | 9.483  | 11.120 | 8.944  | 13.548 | 11.309 |
| 11 | 0.0570 | 9.406  | 6.834  | 8.298  | 12.589 | 12.858 |
| 11 | 0.0580 | 8.228  | 4.665  | 7.456  | 12.791 | 21.693 |
| 11 | 0.0590 | 2.759  | 3.781  | 4.780  | 12.277 | 17.171 |
| 11 | 0.0600 | 5.808  | 6.437  | 7.338  | 9.593  | 16.732 |
| 11 | 0.0610 | 10.526 | 14.581 | 13.015 | 7.196  | 9.921  |
| 11 | 0.0620 | 4.257  | 6.409  | 5.942  | 7.656  | 11.075 |
| 11 | 0.0630 | 2.970  | 5.078  | 6.961  | 10.124 | 20.321 |
| 11 | 0.0640 | 4.542  | 5.140  | 5.033  | 10.339 | 8.963  |
| 11 | 0.0650 | 7.372  | 5.429  | 7.678  | 7.402  | 14.780 |
| 11 | 0.0660 | 10.492 | 11.832 | 12.067 | 11.053 | 11.234 |
| 11 | 0.0670 | 9.171  | 6.251  | 7.034  | 11.533 | 10.814 |
| 11 | 0.0680 | 5.163  | 8.227  | 4.569  | 9.683  | 13.596 |
| 11 | 0.0690 | 3.161  | 3.651  | 3.071  | 1.067  | 6.964  |
| 11 | 0.0700 | 3.614  | 13.398 | 8.614  | 11.203 | 14.411 |
| 11 | 0.0710 | 4.148  | 10.856 | 5.779  | 13.405 | 20.490 |
| 11 | 0.0720 | 5.441  | 11.631 | 7.611  | 11.503 | 16.499 |
| 11 | 0.0730 | 13.207 | 10.904 | 13.671 | 5.827  | 11.933 |
| 11 | 0.0740 | 4.258  | 4.909  | 5.260  | 9.679  | 9.102  |
| 11 | 0.0750 | 7.940  | 14.452 | 10.193 | 16.353 | 10.700 |
| 11 | 0.0760 | 4.264  | 10.062 | 4.947  | 8.038  | 9.321  |
| 11 | 0.0770 | 10.506 | 17.338 | 9.048  | 13.248 | 24.476 |
| 11 | 0.0780 | 8.588  | 7.375  | 7.303  | 5.956  | 12.019 |
| 11 | 0.0790 | 4.084  | 4.620  | 3.194  | 4.793  | 9.579  |
| 11 | 0.0800 | 8.707  | 13.152 | 12.016 | 15.137 | 16.079 |
| 11 | 0.0810 | 12.974 | 15.679 | 14.330 | 15.446 | 9.593  |
| 11 | 0.0820 | 9.811  | 11.450 | 12.632 | 5.930  | 17.535 |
| 11 | 0.0830 | 8.893  | 15.049 | 11.325 | 12.851 | 17.949 |
| 11 | 0.0840 | 12.824 | 21.115 | 12.013 | 14.540 | 4.471  |
| 11 | 0.0850 | 7.837  | 12.989 | 10.217 | 11.100 | 5.304  |
| 11 | 0.0860 | 8.137  | 12.525 | 9.235  | 11.765 | 4.177  |
| 11 | 0.0870 | 11.230 | 26.036 | 19.466 | 26.992 | 14.006 |
| 11 | 0.0880 | 10.547 | 17.205 | 15.976 | 28.526 | 14.518 |
| 11 | 0.0890 | 12.098 | 13.174 | 21.077 | 23.128 | 14.943 |
| 11 | 0.0900 | 11.116 | 11.098 | 13.046 | 11.728 | 19.105 |
| 11 | 0.0910 | 11.576 | 13.499 | 16.079 | 10.079 | 19.313 |
| 11 | 0.0920 | 13.406 | 12.406 | 21.964 | 13.941 | 19.995 |
| 11 | 0.0930 | 13.197 | 11.950 | 16.495 | 18.521 | 11.671 |
| 11 | 0.0940 | 10.745 | 23.030 | 18.226 | 20.528 | 13.198 |
| 11 | 0.0950 | 14.803 | 18.418 | 18.392 | 20.103 | 7.942  |

|    |        |        |        |        |        |        |
|----|--------|--------|--------|--------|--------|--------|
| 11 | 0.0960 | 10.074 | 13.863 | 14.241 | 19.466 | 11.239 |
| 11 | 0.0970 | 9.439  | 17.794 | 11.092 | 14.153 | 11.679 |
| 11 | 0.0980 | 11.572 | 16.805 | 12.172 | 15.814 | 13.636 |
| 11 | 0.0990 | 3.136  | 5.113  | 5.543  | 10.649 | 12.787 |
| 11 | 0.1000 | 5.178  | 4.755  | 6.586  | 3.339  | 13.488 |
| 11 | 0.1010 | 5.844  | 7.501  | 6.927  | 4.339  | 5.778  |
| 11 | 0.1020 | 9.069  | 8.828  | 10.577 | 5.852  | 13.678 |
| 11 | 0.1030 | 12.108 | 16.283 | 12.369 | 12.138 | 24.935 |
| 11 | 0.1040 | 10.969 | 21.656 | 12.283 | 19.940 | 21.272 |
| 11 | 0.1050 | 6.397  | 14.481 | 10.449 | 13.953 | 19.116 |
| 11 | 0.1060 | 8.999  | 9.808  | 12.401 | 7.611  | 12.146 |
| 11 | 0.1070 | 11.012 | 10.655 | 10.572 | 8.916  | 19.019 |
| 11 | 0.1080 | 8.328  | 11.741 | 7.065  | 4.657  | 3.140  |
| 11 | 0.1090 | 3.579  | 8.687  | 7.497  | 6.261  | 7.347  |
| 11 | 0.1100 | 9.247  | 13.906 | 11.391 | 12.722 | 9.688  |
| 11 | 0.1110 | 5.200  | 8.063  | 4.791  | 12.353 | 12.169 |
| 11 | 0.1120 | 14.186 | 12.733 | 14.423 | 9.622  | 15.157 |
| 11 | 0.1130 | 11.603 | 11.776 | 7.710  | 30.537 | 18.746 |
| 11 | 0.1140 | 8.029  | 8.793  | 8.722  | 25.853 | 19.600 |
| 11 | 0.1150 | 0.960  | 4.985  | 5.278  | 9.477  | 6.017  |
| 11 | 0.1160 | 0.955  | 4.041  | 4.512  | 8.640  | 9.551  |
| 11 | 0.1170 | 2.858  | 3.666  | 3.294  | 9.602  | 5.765  |
| 11 | 0.1180 | 7.857  | 8.395  | 8.302  | 6.889  | 9.251  |
| 11 | 0.1190 | 14.717 | 12.136 | 14.969 | 9.309  | 14.015 |
| 11 | 0.1200 | 15.652 | 16.607 | 11.300 | 8.338  | 21.038 |
| 11 | 0.1210 | 6.438  | 14.723 | 8.156  | 10.380 | 6.303  |
| 11 | 0.1220 | 7.602  | 13.087 | 8.583  | 11.096 | 8.740  |
| 11 | 0.1230 | 7.705  | 9.652  | 9.545  | 8.148  | 4.222  |
| 11 | 0.1240 | 8.789  | 11.394 | 9.482  | 9.823  | 8.137  |
| 11 | 0.1250 | 9.148  | 10.174 | 11.424 | 11.007 | 14.647 |
| 11 | 0.1260 | 8.627  | 16.197 | 13.606 | 15.815 | 8.457  |
| 11 | 0.1270 | 6.329  | 9.865  | 12.214 | 11.602 | 19.506 |
| 11 | 0.1280 | 13.789 | 13.155 | 13.893 | 5.603  | 16.668 |
| 11 | 0.1290 | 3.505  | 2.469  | 6.007  | 11.307 | 16.582 |
| 11 | 0.1300 | 8.171  | 5.351  | 6.099  | 13.553 | 9.807  |
| 11 | 0.1310 | 12.249 | 12.371 | 16.151 | 12.307 | 12.000 |
| 11 | 0.1320 | 9.385  | 11.931 | 15.014 | 7.465  | 27.082 |
| 11 | 0.1330 | 9.522  | 11.985 | 15.172 | 7.410  | 27.090 |
| 11 | 0.1340 | 10.074 | 11.081 | 11.938 | 19.463 | 12.974 |
| 11 | 0.1350 | 9.632  | 12.920 | 11.100 | 18.249 | 15.181 |
| 11 | 0.1360 | 10.129 | 8.205  | 14.303 | 11.163 | 17.452 |
| 11 | 0.1370 | 6.183  | 11.926 | 11.574 | 10.063 | 15.102 |
| 11 | 0.1380 | 4.978  | 12.540 | 10.783 | 13.352 | 15.909 |
| 11 | 0.1390 | 8.749  | 8.983  | 12.626 | 9.577  | 11.202 |
| 11 | 0.1400 | 8.918  | 9.094  | 12.864 | 9.444  | 11.178 |
| 11 | 0.1410 | 11.601 | 8.751  | 13.854 | 8.134  | 6.310  |
| 11 | 0.1420 | 18.288 | 12.785 | 17.025 | 7.247  | 14.868 |
| 11 | 0.1430 | 18.063 | 13.326 | 15.437 | 17.706 | 10.082 |
| 11 | 0.1440 | 7.961  | 6.036  | 5.598  | 4.887  | 3.795  |
| 11 | 0.1450 | 10.164 | 11.290 | 10.217 | 13.695 | 14.623 |



|    |        |        |        |        |        |        |
|----|--------|--------|--------|--------|--------|--------|
| 11 | 0.1460 | 9.628  | 11.407 | 12.764 | 9.582  | 8.514  |
| 11 | 0.1470 | 5.745  | 11.218 | 6.552  | 7.171  | 5.686  |
| 11 | 0.1480 | 6.444  | 7.932  | 6.821  | 4.728  | 5.808  |
| 11 | 0.1490 | 6.783  | 7.824  | 8.868  | 4.702  | 9.190  |
| 11 | 0.1500 | 7.634  | 7.456  | 7.473  | 6.578  | 9.375  |
| 11 | 0.1510 | 2.328  | 1.376  | 3.438  | 2.770  | 3.096  |
| 11 | 0.1520 | 10.450 | 13.764 | 20.632 | 9.583  | 10.669 |
| 11 | 0.1530 | 6.944  | 8.805  | 8.490  | 14.356 | 8.524  |
| 11 | 0.1540 | 19.367 | 21.551 | 28.042 | 7.842  | 8.582  |
| 11 | 0.1550 | 13.921 | 22.896 | 16.279 | 12.871 | 11.508 |
| 11 | 0.1560 | 19.264 | 13.502 | 19.218 | 19.321 | 8.109  |
| 11 | 0.1570 | 5.319  | 9.961  | 7.909  | 5.152  | 4.570  |
| 11 | 0.1580 | 5.430  | 8.758  | 10.470 | 4.369  | 8.956  |
| 11 | 0.1590 | 5.216  | 9.644  | 9.078  | 8.571  | 9.309  |
| 11 | 0.1600 | 7.703  | 9.553  | 11.179 | 15.706 | 11.496 |
| 11 | 0.1610 | 5.054  | 6.088  | 11.193 | 13.697 | 6.404  |
| 11 | 0.1620 | 6.042  | 11.577 | 10.136 | 15.611 | 6.707  |
| 11 | 0.1630 | 9.331  | 10.289 | 13.835 | 9.631  | 11.449 |
| 11 | 0.1640 | 8.795  | 8.966  | 8.663  | 10.892 | 16.374 |
| 11 | 0.1650 | 7.999  | 6.031  | 7.393  | 5.083  | 12.504 |
| 11 | 0.1660 | 4.057  | 4.826  | 10.184 | 14.467 | 7.079  |
| 11 | 0.1670 | 9.038  | 13.579 | 14.653 | 12.376 | 15.345 |
| 11 | 0.1680 | 11.398 | 20.248 | 20.724 | 17.576 | 20.001 |
| 11 | 0.1690 | 20.542 | 18.953 | 23.305 | 12.881 | 6.592  |
| 11 | 0.1700 | 27.859 | 21.678 | 20.311 | 10.710 | 16.815 |
| 11 | 0.1710 | 11.070 | 11.053 | 12.655 | 14.646 | 10.748 |
| 11 | 0.1720 | 13.792 | 12.119 | 16.118 | 16.989 | 9.192  |
| 11 | 0.1730 | 6.484  | 8.395  | 13.690 | 12.373 | 7.203  |
| 11 | 0.1740 | 6.633  | 11.503 | 12.999 | 13.645 | 8.158  |
| 11 | 0.1750 | 6.669  | 7.560  | 10.064 | 5.363  | 7.674  |
| 11 | 0.1760 | 28.779 | 18.316 | 23.180 | 10.924 | 5.906  |
| 11 | 0.1770 | 8.133  | 6.057  | 7.191  | 8.819  | 7.437  |
| 11 | 0.1780 | 4.344  | 5.631  | 8.010  | 6.952  | 9.849  |
| 11 | 0.1790 | 6.012  | 4.855  | 9.869  | 8.015  | 14.833 |
| 11 | 0.1800 | 6.094  | 5.390  | 10.096 | 11.246 | 13.128 |
| 11 | 0.1810 | 4.720  | 3.972  | 8.188  | 10.076 | 21.140 |
| 11 | 0.1820 | 2.452  | 2.284  | 5.191  | 3.514  | 5.245  |
| 11 | 0.1830 | 24.635 | 10.600 | 21.696 | 7.690  | 9.744  |
| 11 | 0.1840 | 10.118 | 14.404 | 14.462 | 12.225 | 17.134 |
| 11 | 0.1850 | 7.867  | 9.088  | 7.298  | 11.347 | 17.944 |
| 11 | 0.1860 | 6.084  | 7.046  | 7.113  | 14.060 | 7.155  |
| 11 | 0.1870 | 7.104  | 9.714  | 8.289  | 10.886 | 6.878  |
| 11 | 0.1880 | 12.032 | 10.597 | 10.636 | 10.277 | 13.408 |
| 11 | 0.1890 | 15.495 | 11.497 | 12.868 | 18.161 | 18.111 |
| 11 | 0.1900 | 6.556  | 6.744  | 9.907  | 18.849 | 16.119 |
| 11 | 0.1910 | 6.567  | 8.883  | 10.435 | 7.408  | 21.737 |
| 11 | 0.1920 | 7.289  | 6.172  | 5.785  | 7.920  | 19.645 |
| 11 | 0.1930 | 8.907  | 6.807  | 7.477  | 7.380  | 8.239  |
| 11 | 0.1940 | 8.565  | 9.648  | 5.305  | 15.011 | 13.367 |
| 11 | 0.1950 | 4.001  | 7.398  | 6.177  | 15.192 | 9.750  |

|    |        |        |        |        |        |        |
|----|--------|--------|--------|--------|--------|--------|
| 11 | 0.1960 | 15.434 | 10.995 | 11.889 | 8.088  | 26.441 |
| 11 | 0.1970 | 6.726  | 6.199  | 5.902  | 21.127 | 21.348 |
| 11 | 0.1980 | 9.125  | 14.244 | 12.593 | 26.738 | 21.647 |
| 11 | 0.1990 | 7.007  | 11.787 | 6.920  | 25.420 | 25.953 |
| 11 | 0.2000 | 7.325  | 17.829 | 9.233  | 26.491 | 18.376 |
| 11 | 0.2010 | 20.291 | 7.806  | 14.883 | 18.448 | 19.793 |
| 11 | 0.2020 | 8.573  | 9.932  | 7.675  | 14.201 | 19.910 |
| 11 | 0.2030 | 11.372 | 16.229 | 12.287 | 21.407 | 14.444 |
| 11 | 0.2040 | 7.293  | 11.974 | 8.334  | 22.750 | 25.497 |
| 11 | 0.2050 | 3.059  | 3.301  | 2.881  | 16.592 | 11.628 |
| 11 | 0.2060 | 7.309  | 7.689  | 4.220  | 20.557 | 21.932 |
| 11 | 0.2070 | 5.359  | 5.904  | 3.752  | 13.090 | 21.862 |
| 11 | 0.2080 | 11.667 | 7.579  | 8.151  | 11.510 | 12.837 |
| 11 | 0.2090 | 11.586 | 7.160  | 7.558  | 11.316 | 14.048 |
| 11 | 0.2100 | 7.621  | 7.912  | 3.866  | 13.812 | 19.013 |
| 11 | 0.2110 | 13.991 | 14.131 | 6.674  | 10.071 | 20.958 |
| 11 | 0.2120 | 9.334  | 9.983  | 4.860  | 17.020 | 30.715 |
| 11 | 0.2130 | 13.071 | 17.014 | 12.706 | 19.547 | 22.884 |
| 11 | 0.2140 | 11.484 | 14.759 | 14.407 | 17.647 | 17.974 |
| 11 | 0.2150 | 10.455 | 11.308 | 7.891  | 17.482 | 12.996 |
| 11 | 0.2160 | 15.084 | 9.692  | 8.480  | 21.222 | 16.056 |
| 11 | 0.2170 | 9.332  | 9.568  | 8.231  | 13.853 | 15.093 |
| 11 | 0.2180 | 7.668  | 7.151  | 9.060  | 7.741  | 12.785 |
| 11 | 0.2190 | 9.785  | 9.325  | 8.351  | 14.042 | 22.449 |
| 11 | 0.2200 | 14.727 | 8.640  | 11.327 | 7.397  | 21.819 |
| 11 | 0.2210 | 14.024 | 9.758  | 6.988  | 18.084 | 17.368 |
| 11 | 0.2220 | 7.208  | 7.979  | 6.355  | 17.570 | 18.744 |
| 11 | 0.2230 | 19.091 | 10.115 | 12.413 | 19.219 | 24.864 |
| 11 | 0.2240 | 18.848 | 9.442  | 14.194 | 16.124 | 26.166 |
| 11 | 0.2250 | 17.606 | 17.936 | 17.812 | 11.399 | 15.411 |
| 11 | 0.2260 | 17.278 | 13.110 | 18.267 | 15.404 | 23.857 |
| 11 | 0.2270 | 13.919 | 10.907 | 11.377 | 5.948  | 21.725 |
| 11 | 0.2280 | 15.020 | 10.355 | 12.789 | 15.833 | 21.521 |
| 11 | 0.2290 | 20.307 | 18.074 | 22.908 | 8.897  | 20.780 |
| 11 | 0.2300 | 8.296  | 4.874  | 9.142  | 12.162 | 15.337 |
| 11 | 0.2310 | 16.094 | 5.087  | 7.315  | 15.373 | 24.142 |
| 11 | 0.2320 | 9.895  | 13.109 | 7.615  | 15.441 | 15.623 |
| 11 | 0.2330 | 19.884 | 9.355  | 16.607 | 11.719 | 13.552 |
| 11 | 0.2340 | 20.050 | 11.707 | 16.328 | 13.135 | 9.854  |
| 11 | 0.2350 | 9.518  | 15.149 | 13.975 | 17.242 | 10.340 |
| 11 | 0.2360 | 14.361 | 9.493  | 15.210 | 8.568  | 9.474  |
| 11 | 0.2370 | 11.949 | 10.022 | 10.310 | 7.459  | 14.897 |
| 11 | 0.2380 | 14.195 | 11.930 | 9.448  | 15.124 | 15.656 |
| 11 | 0.2390 | 18.747 | 15.321 | 14.352 | 11.579 | 23.389 |
| 11 | 0.2400 | 22.870 | 17.844 | 19.233 | 9.978  | 25.951 |
| 11 | 0.2410 | 11.641 | 9.330  | 12.657 | 6.291  | 18.536 |
| 11 | 0.2420 | 20.027 | 14.715 | 10.756 | 11.320 | 16.118 |
| 11 | 0.2430 | 6.659  | 7.106  | 12.439 | 2.409  | 5.450  |
| 11 | 0.2440 | 8.069  | 12.329 | 12.654 | 14.067 | 14.018 |
| 11 | 0.2450 | 7.354  | 8.179  | 8.268  | 9.982  | 12.336 |

|    |        |        |        |        |        |        |
|----|--------|--------|--------|--------|--------|--------|
| 11 | 0.2460 | 8.796  | 9.587  | 10.999 | 9.328  | 9.154  |
| 11 | 0.2470 | 13.615 | 8.494  | 10.922 | 5.380  | 11.666 |
| 11 | 0.2480 | 15.866 | 10.377 | 12.667 | 6.226  | 16.742 |
| 11 | 0.2490 | 18.500 | 13.540 | 16.908 | 14.026 | 11.288 |
| 11 | 0.2500 | 12.134 | 9.906  | 13.044 | 12.167 | 18.079 |
| 11 | 0.2510 | 14.035 | 8.435  | 10.162 | 10.632 | 18.289 |
| 11 | 0.2520 | 20.024 | 19.865 | 14.608 | 11.067 | 28.217 |
| 11 | 0.2530 | 7.716  | 6.795  | 8.581  | 4.446  | 4.505  |
| 11 | 0.2540 | 11.341 | 7.490  | 12.395 | 5.488  | 4.447  |
| 11 | 0.2550 | 11.663 | 8.726  | 6.189  | 6.028  | 10.948 |
| 11 | 0.2560 | 16.565 | 15.745 | 16.262 | 9.714  | 20.334 |
| 11 | 0.2570 | 8.995  | 14.647 | 11.455 | 12.516 | 15.208 |
| 11 | 0.2580 | 4.991  | 9.788  | 7.980  | 12.764 | 12.479 |
| 11 | 0.2590 | 14.962 | 20.638 | 13.728 | 8.721  | 23.995 |
| 11 | 0.2600 | 10.698 | 14.333 | 14.881 | 9.304  | 16.598 |
| 11 | 0.2610 | 21.107 | 14.333 | 13.887 | 16.990 | 20.131 |
| 11 | 0.2620 | 15.745 | 12.941 | 11.189 | 10.393 | 19.686 |
| 11 | 0.2630 | 18.413 | 20.190 | 19.038 | 12.554 | 15.707 |
| 11 | 0.2640 | 9.626  | 13.504 | 12.340 | 4.731  | 2.893  |
| 11 | 0.2650 | 12.153 | 13.970 | 14.662 | 12.543 | 6.025  |
| 11 | 0.2660 | 9.956  | 5.905  | 8.549  | 17.309 | 7.498  |
| 11 | 0.2670 | 3.657  | 10.962 | 4.123  | 17.001 | 10.052 |
| 11 | 0.2680 | 5.321  | 9.161  | 4.956  | 11.423 | 10.177 |
| 11 | 0.2690 | 14.974 | 14.197 | 14.276 | 10.515 | 21.637 |
| 11 | 0.2700 | 14.397 | 19.608 | 19.470 | 6.001  | 23.203 |
| 11 | 0.2710 | 15.051 | 13.328 | 9.554  | 7.889  | 17.394 |
| 11 | 0.2720 | 4.815  | 9.090  | 11.231 | 9.901  | 16.063 |
| 11 | 0.2730 | 8.007  | 15.319 | 12.896 | 17.643 | 14.717 |
| 11 | 0.2740 | 7.299  | 10.852 | 9.255  | 15.260 | 18.356 |
| 11 | 0.2750 | 12.190 | 20.652 | 14.338 | 20.702 | 31.470 |
| 11 | 0.2760 | 10.322 | 14.239 | 9.690  | 17.593 | 17.140 |
| 11 | 0.2770 | 8.168  | 10.834 | 9.643  | 10.104 | 12.869 |
| 11 | 0.2780 | 9.575  | 10.209 | 9.087  | 18.744 | 18.780 |
| 11 | 0.2790 | 9.726  | 14.040 | 11.850 | 14.741 | 9.027  |
| 11 | 0.2800 | 13.199 | 20.227 | 15.169 | 12.312 | 11.150 |
| 11 | 0.2810 | 15.074 | 15.249 | 14.393 | 6.562  | 20.172 |
| 11 | 0.2820 | 14.166 | 10.736 | 16.515 | 19.266 | 12.324 |
| 11 | 0.2830 | 12.186 | 13.717 | 14.487 | 9.386  | 16.013 |
| 11 | 0.2840 | 9.331  | 7.998  | 13.536 | 8.120  | 10.876 |
| 11 | 0.2850 | 12.894 | 12.848 | 17.876 | 14.969 | 26.411 |
| 11 | 0.2860 | 5.948  | 6.334  | 7.035  | 5.694  | 14.975 |
| 11 | 0.2870 | 8.674  | 13.162 | 10.214 | 5.210  | 13.151 |
| 11 | 0.2880 | 4.601  | 6.804  | 5.004  | 5.797  | 5.763  |
| 11 | 0.2890 | 13.135 | 13.344 | 10.694 | 11.883 | 13.858 |
| 11 | 0.2900 | 20.814 | 23.425 | 20.798 | 20.791 | 23.053 |
| 11 | 0.2910 | 18.945 | 14.329 | 20.384 | 8.669  | 18.090 |
| 11 | 0.2920 | 17.010 | 19.033 | 17.643 | 10.037 | 19.895 |
| 11 | 0.2930 | 10.116 | 14.845 | 12.612 | 25.237 | 31.163 |
| 11 | 0.2940 | 12.968 | 12.544 | 16.097 | 19.385 | 28.710 |
| 11 | 0.2950 | 13.578 | 11.565 | 13.039 | 9.333  | 23.960 |

|    |        |        |        |        |        |        |
|----|--------|--------|--------|--------|--------|--------|
| 11 | 0.2960 | 3.313  | 3.983  | 3.916  | 5.065  | 16.676 |
| 11 | 0.2970 | 7.550  | 6.169  | 5.889  | 11.308 | 23.891 |
| 11 | 0.2980 | 15.240 | 14.788 | 16.507 | 15.115 | 29.581 |
| 11 | 0.2990 | 14.603 | 14.397 | 14.514 | 11.409 | 12.968 |
| 11 | 0.3000 | 6.803  | 9.596  | 10.382 | 10.936 | 20.994 |
| 11 | 0.3010 | 14.648 | 15.437 | 16.861 | 12.299 | 19.411 |
| 11 | 0.3020 | 14.922 | 13.190 | 12.408 | 11.190 | 14.709 |
| 11 | 0.3030 | 17.508 | 18.141 | 20.169 | 6.375  | 17.282 |
| 11 | 0.3040 | 16.001 | 15.434 | 17.654 | 8.141  | 14.088 |
| 11 | 0.3050 | 18.725 | 24.051 | 23.451 | 13.589 | 12.477 |
| 11 | 0.3060 | 19.176 | 15.169 | 17.692 | 8.827  | 7.262  |
| 11 | 0.3070 | 8.958  | 9.019  | 8.433  | 5.802  | 11.187 |
| 11 | 0.3080 | 10.756 | 7.475  | 10.075 | 15.352 | 10.207 |
| 11 | 0.3090 | 14.894 | 17.119 | 18.287 | 10.234 | 10.436 |
| 11 | 0.3100 | 19.477 | 26.058 | 21.739 | 13.299 | 14.685 |
| 11 | 0.3110 | 21.862 | 17.691 | 19.510 | 7.653  | 6.749  |
| 11 | 0.3120 | 17.519 | 15.805 | 16.986 | 19.654 | 7.833  |
| 11 | 0.3130 | 16.838 | 19.344 | 20.599 | 9.798  | 7.377  |
| 11 | 0.3140 | 15.121 | 21.472 | 20.907 | 8.354  | 7.162  |
| 11 | 0.3150 | 6.282  | 9.953  | 4.498  | 12.164 | 10.548 |
| 11 | 0.3160 | 4.599  | 8.856  | 7.367  | 8.232  | 6.244  |
| 11 | 0.3170 | 13.087 | 9.744  | 13.602 | 3.544  | 2.294  |
| 11 | 0.3180 | 18.683 | 12.782 | 13.767 | 7.458  | 10.897 |
| 11 | 0.3190 | 10.762 | 8.460  | 7.692  | 19.983 | 9.720  |
| 11 | 0.3200 | 10.129 | 8.596  | 10.645 | 9.779  | 15.488 |
| 11 | 0.3210 | 12.753 | 18.280 | 13.543 | 9.224  | 22.713 |
| 11 | 0.3220 | 15.834 | 16.565 | 14.958 | 8.787  | 19.613 |
| 11 | 0.3230 | 6.123  | 8.054  | 9.836  | 9.038  | 8.936  |
| 11 | 0.3240 | 12.925 | 11.651 | 10.714 | 10.017 | 11.872 |
| 11 | 0.3250 | 16.499 | 15.030 | 13.321 | 7.725  | 20.065 |
| 11 | 0.3260 | 18.288 | 9.503  | 12.297 | 16.076 | 13.435 |
| 11 | 0.3270 | 11.843 | 10.052 | 10.917 | 7.035  | 8.545  |
| 11 | 0.3280 | 4.620  | 3.844  | 5.461  | 6.652  | 10.375 |
| 11 | 0.3290 | 12.349 | 11.096 | 12.881 | 6.798  | 12.219 |
| 11 | 0.3300 | 12.439 | 16.722 | 14.410 | 15.380 | 14.837 |
| 11 | 0.3310 | 14.634 | 20.668 | 11.517 | 9.676  | 10.149 |
| 11 | 0.3320 | 7.449  | 11.605 | 11.207 | 11.071 | 12.681 |
| 11 | 0.3330 | 11.320 | 16.334 | 14.000 | 13.840 | 12.974 |
| 11 | 0.3340 | 14.911 | 14.869 | 12.826 | 11.277 | 14.458 |
| 11 | 0.3350 | 16.047 | 14.960 | 13.936 | 12.941 | 13.983 |
| 11 | 0.3360 | 9.089  | 7.383  | 11.484 | 13.494 | 12.240 |
| 11 | 0.3370 | 10.398 | 10.572 | 10.850 | 4.822  | 7.285  |
| 11 | 0.3380 | 11.638 | 14.371 | 13.569 | 11.662 | 17.467 |
| 11 | 0.3390 | 9.128  | 14.745 | 11.576 | 11.326 | 19.167 |
| 11 | 0.3400 | 21.660 | 26.176 | 24.044 | 8.456  | 13.368 |
| 11 | 0.3410 | 10.110 | 16.582 | 15.522 | 10.060 | 4.833  |
| 11 | 0.3420 | 9.484  | 11.701 | 9.382  | 3.810  | 2.110  |
| 11 | 0.3430 | 7.831  | 10.858 | 7.222  | 9.634  | 14.372 |
| 11 | 0.3440 | 13.238 | 12.937 | 12.523 | 9.594  | 14.571 |
| 11 | 0.3450 | 13.883 | 12.593 | 15.454 | 15.285 | 13.604 |

|    |        |        |        |        |        |        |
|----|--------|--------|--------|--------|--------|--------|
| 11 | 0.3460 | 29.523 | 25.717 | 27.147 | 12.579 | 17.135 |
| 11 | 0.3470 | 17.164 | 9.831  | 12.907 | 12.788 | 5.654  |
| 11 | 0.3480 | 35.076 | 20.256 | 26.066 | 7.652  | 12.673 |
| 11 | 0.3490 | 8.834  | 12.894 | 14.254 | 6.815  | 7.118  |
| 11 | 0.3500 | 15.762 | 11.668 | 21.657 | 13.537 | 7.051  |
| 11 | 0.3510 | 13.415 | 7.412  | 16.127 | 9.880  | 10.709 |
| 11 | 0.3520 | 26.223 | 21.109 | 30.838 | 10.786 | 4.880  |
| 11 | 0.3530 | 18.817 | 12.032 | 14.967 | 10.185 | 9.079  |
| 11 | 0.3540 | 29.901 | 20.294 | 18.348 | 11.071 | 18.520 |
| 11 | 0.3550 | 24.868 | 14.843 | 27.319 | 10.610 | 13.386 |
| 11 | 0.3560 | 9.282  | 14.132 | 17.556 | 10.153 | 11.707 |
| 11 | 0.3570 | 21.530 | 13.994 | 18.503 | 10.103 | 28.622 |
| 11 | 0.3580 | 10.796 | 15.536 | 17.161 | 14.530 | 15.609 |
| 11 | 0.3590 | 8.923  | 14.308 | 12.432 | 13.552 | 5.116  |
| 11 | 0.3600 | 21.044 | 25.630 | 25.765 | 22.924 | 10.777 |
| 11 | 0.3610 | 16.412 | 16.969 | 22.510 | 11.586 | 19.618 |
| 11 | 0.3620 | 20.789 | 9.994  | 21.122 | 18.637 | 18.647 |
| 11 | 0.3630 | 15.948 | 12.191 | 20.580 | 13.448 | 6.998  |
| 11 | 0.3640 | 28.163 | 24.243 | 31.075 | 12.825 | 19.778 |
| 11 | 0.3650 | 24.321 | 20.488 | 15.502 | 15.094 | 22.483 |
| 11 | 0.3660 | 27.876 | 19.319 | 22.505 | 16.982 | 18.231 |
| 11 | 0.3670 | 18.913 | 15.632 | 20.959 | 13.527 | 12.850 |
| 11 | 0.3680 | 9.990  | 8.221  | 13.433 | 7.727  | 9.651  |
| 11 | 0.3690 | 14.919 | 11.920 | 15.698 | 16.674 | 18.532 |
| 11 | 0.3700 | 26.946 | 15.047 | 22.760 | 19.027 | 27.748 |
| 11 | 0.3710 | 19.201 | 13.679 | 20.145 | 20.251 | 17.103 |
| 11 | 0.3720 | 12.523 | 15.320 | 20.069 | 10.878 | 13.138 |
| 11 | 0.3730 | 21.458 | 19.923 | 18.714 | 15.187 | 17.371 |
| 11 | 0.3740 | 11.824 | 7.520  | 7.555  | 15.564 | 13.694 |
| 11 | 0.3750 | 10.850 | 12.801 | 12.434 | 5.183  | 2.372  |
| 11 | 0.3760 | 13.636 | 10.990 | 14.299 | 9.440  | 4.502  |
| 11 | 0.3770 | 17.402 | 8.275  | 16.768 | 9.842  | 8.623  |
| 11 | 0.3780 | 7.400  | 6.974  | 13.776 | 5.510  | 4.576  |
| 11 | 0.3790 | 5.596  | 6.865  | 12.300 | 0.261  | 3.781  |
| 11 | 0.3800 | 8.865  | 9.307  | 17.408 | 1.259  | 11.180 |
| 11 | 0.3810 | 8.982  | 15.434 | 17.387 | 4.206  | 12.874 |
| 11 | 0.3820 | 6.262  | 9.460  | 7.062  | 4.335  | 8.555  |
| 11 | 0.3830 | 6.258  | 9.453  | 7.059  | 4.334  | 8.571  |
| 11 | 0.3840 | 11.043 | 14.532 | 18.969 | 5.841  | 10.783 |
| 11 | 0.3850 | 13.874 | 20.746 | 20.610 | 17.452 | 12.579 |
| 11 | 0.3860 | 24.357 | 26.550 | 30.280 | 11.532 | 15.055 |
| 11 | 0.3870 | 11.260 | 10.107 | 15.068 | 8.563  | 13.169 |
| 11 | 0.3880 | 12.960 | 10.762 | 16.949 | 11.850 | 4.325  |
| 11 | 0.3890 | 17.068 | 18.322 | 16.107 | 27.539 | 8.783  |
| 11 | 0.3900 | 12.339 | 17.598 | 14.262 | 15.331 | 6.424  |
| 11 | 0.3910 | 5.291  | 10.572 | 9.726  | 12.195 | 10.403 |
| 11 | 0.3920 | 17.328 | 17.616 | 20.125 | 16.315 | 14.916 |
| 11 | 0.3930 | 19.157 | 22.182 | 27.000 | 11.267 | 18.184 |
| 11 | 0.3940 | 9.005  | 7.374  | 7.994  | 12.703 | 5.272  |
| 11 | 0.3950 | 8.983  | 12.777 | 8.235  | 13.951 | 7.026  |

|    |        |        |        |        |        |        |
|----|--------|--------|--------|--------|--------|--------|
| 11 | 0.3960 | 7.410  | 11.132 | 9.781  | 13.263 | 15.846 |
| 11 | 0.3970 | 14.695 | 10.938 | 13.885 | 15.081 | 9.823  |
| 11 | 0.3980 | 10.976 | 8.383  | 13.531 | 14.106 | 9.329  |
| 11 | 0.3990 | 31.639 | 24.858 | 30.408 | 13.395 | 15.524 |
| 11 | 0.4000 | 14.902 | 14.956 | 17.815 | 8.385  | 14.456 |
| 11 | 0.4010 | 8.248  | 12.841 | 7.563  | 12.789 | 15.250 |
| 11 | 0.4020 | 6.850  | 8.788  | 5.773  | 17.767 | 7.900  |
| 11 | 0.4030 | 5.793  | 2.859  | 1.798  | 11.160 | 11.027 |
| 11 | 0.4040 | 9.730  | 9.676  | 6.735  | 24.613 | 16.266 |
| 11 | 0.4050 | 9.713  | 9.679  | 6.713  | 24.601 | 16.298 |
| 11 | 0.4060 | 28.412 | 21.995 | 25.499 | 10.267 | 8.463  |
| 11 | 0.4070 | 11.124 | 14.158 | 13.124 | 6.890  | 15.926 |
| 11 | 0.4080 | 13.987 | 18.722 | 15.953 | 10.399 | 20.380 |
| 11 | 0.4090 | 20.047 | 24.667 | 26.083 | 10.111 | 17.012 |
| 11 | 0.4100 | 15.144 | 15.475 | 16.121 | 9.646  | 11.930 |
| 11 | 0.4110 | 24.803 | 22.910 | 27.398 | 19.231 | 13.963 |
| 11 | 0.4120 | 13.231 | 10.141 | 15.660 | 15.475 | 9.106  |
| 11 | 0.4130 | 13.101 | 12.406 | 15.611 | 14.813 | 7.879  |
| 11 | 0.4140 | 18.890 | 15.317 | 15.301 | 10.643 | 9.573  |
| 11 | 0.4150 | 27.939 | 23.200 | 26.321 | 3.411  | 8.478  |
| 11 | 0.4160 | 22.199 | 16.869 | 23.293 | 10.061 | 12.019 |
| 11 | 0.4170 | 11.506 | 19.634 | 16.423 | 10.341 | 17.551 |
| 11 | 0.4180 | 16.969 | 18.834 | 19.361 | 11.264 | 14.991 |
| 11 | 0.4190 | 19.481 | 14.808 | 17.469 | 30.369 | 14.215 |
| 11 | 0.4200 | 25.444 | 16.018 | 23.694 | 16.058 | 15.609 |
| 11 | 0.4210 | 21.098 | 12.069 | 17.515 | 9.520  | 18.482 |
| 11 | 0.4220 | 18.822 | 28.139 | 21.246 | 21.391 | 17.301 |
| 11 | 0.4230 | 30.471 | 23.534 | 20.434 | 7.346  | 15.091 |
| 11 | 0.4240 | 21.590 | 21.843 | 21.919 | 9.009  | 20.887 |
| 11 | 0.4250 | 19.785 | 19.323 | 20.587 | 10.726 | 16.305 |
| 11 | 0.4260 | 21.650 | 21.003 | 28.827 | 12.640 | 15.823 |
| 11 | 0.4270 | 20.754 | 26.509 | 25.934 | 15.646 | 24.663 |
| 11 | 0.4280 | 20.800 | 17.533 | 17.654 | 19.383 | 25.534 |
| 11 | 0.4290 | 20.742 | 18.011 | 14.277 | 11.316 | 11.341 |
| 11 | 0.4300 | 27.814 | 18.594 | 19.796 | 12.484 | 17.265 |
| 11 | 0.4310 | 7.759  | 12.680 | 9.192  | 11.504 | 7.998  |
| 11 | 0.4320 | 10.745 | 13.908 | 14.577 | 12.533 | 4.062  |
| 11 | 0.4330 | 20.127 | 20.669 | 22.799 | 20.218 | 12.315 |
| 11 | 0.4340 | 25.861 | 22.346 | 21.716 | 26.772 | 17.174 |
| 11 | 0.4350 | 24.803 | 25.131 | 25.961 | 20.436 | 19.868 |
| 11 | 0.4360 | 20.368 | 21.726 | 21.013 | 19.442 | 16.713 |
| 11 | 0.4370 | 13.994 | 16.722 | 19.909 | 2.393  | 15.542 |
| 11 | 0.4380 | 23.216 | 21.804 | 28.199 | 6.192  | 15.705 |
| 11 | 0.4390 | 19.252 | 19.325 | 22.469 | 15.388 | 11.966 |
| 11 | 0.4400 | 14.476 | 17.861 | 15.715 | 14.255 | 16.372 |
| 11 | 0.4410 | 13.002 | 19.520 | 16.429 | 12.126 | 19.920 |
| 11 | 0.4420 | 20.787 | 20.283 | 19.838 | 16.932 | 23.743 |
| 11 | 0.4430 | 12.675 | 11.662 | 14.733 | 4.972  | 8.876  |
| 11 | 0.4440 | 16.888 | 16.343 | 15.654 | 15.387 | 11.049 |
| 11 | 0.4450 | 12.522 | 22.509 | 11.603 | 30.361 | 14.433 |

|    |        |        |        |        |        |        |
|----|--------|--------|--------|--------|--------|--------|
| 11 | 0.4460 | 16.789 | 29.998 | 20.415 | 24.057 | 18.913 |
| 11 | 0.4470 | 22.625 | 24.285 | 28.494 | 13.214 | 8.907  |
| 11 | 0.4480 | 15.413 | 16.726 | 18.269 | 7.180  | 10.112 |
| 11 | 0.4490 | 17.705 | 18.533 | 13.869 | 11.143 | 13.119 |
| 11 | 0.4500 | 15.409 | 17.294 | 18.543 | 12.491 | 18.044 |
| 11 | 0.4510 | 8.924  | 9.410  | 10.424 | 22.056 | 24.070 |
| 11 | 0.4520 | 17.417 | 14.523 | 11.401 | 11.035 | 16.482 |
| 11 | 0.4530 | 19.464 | 16.190 | 16.146 | 17.376 | 18.509 |
| 11 | 0.4540 | 20.378 | 28.906 | 23.988 | 14.140 | 15.049 |
| 11 | 0.4550 | 15.910 | 12.982 | 9.730  | 9.751  | 22.450 |
| 11 | 0.4560 | 15.311 | 5.517  | 12.479 | 12.594 | 9.168  |
| 11 | 0.4570 | 21.331 | 26.213 | 22.748 | 11.115 | 10.617 |
| 11 | 0.4580 | 17.248 | 15.395 | 18.259 | 11.129 | 4.244  |
| 11 | 0.4590 | 26.939 | 19.297 | 31.647 | 13.673 | 12.621 |
| 11 | 0.4600 | 18.079 | 21.965 | 21.105 | 6.723  | 9.669  |
| 11 | 0.4610 | 25.963 | 14.903 | 22.895 | 10.314 | 7.749  |
| 11 | 0.4620 | 6.882  | 6.773  | 9.861  | 7.256  | 7.130  |
| 11 | 0.4630 | 8.920  | 6.847  | 14.420 | 15.373 | 8.393  |
| 11 | 0.4640 | 18.437 | 8.496  | 17.144 | 19.093 | 20.046 |
| 11 | 0.4650 | 10.037 | 9.495  | 17.698 | 3.250  | 8.242  |
| 11 | 0.4660 | 11.967 | 14.204 | 18.345 | 10.365 | 10.841 |
| 11 | 0.4670 | 6.158  | 7.350  | 11.806 | 6.314  | 5.438  |
| 11 | 0.4680 | 6.819  | 5.442  | 9.233  | 4.172  | 11.469 |
| 11 | 0.4690 | 16.937 | 9.991  | 11.962 | 10.784 | 9.941  |
| 11 | 0.4700 | 13.850 | 19.446 | 19.702 | 13.401 | 11.886 |
| 11 | 0.4710 | 7.811  | 6.158  | 6.871  | 12.334 | 12.237 |
| 11 | 0.4720 | 10.394 | 14.117 | 14.315 | 27.284 | 24.496 |
| 11 | 0.4730 | 10.409 | 14.086 | 14.310 | 27.220 | 24.534 |
| 11 | 0.4740 | 10.425 | 14.060 | 14.304 | 27.179 | 24.568 |
| 11 | 0.4750 | 11.255 | 9.470  | 13.330 | 21.246 | 9.127  |
| 11 | 0.4760 | 9.312  | 8.515  | 12.741 | 9.655  | 10.541 |
| 11 | 0.4770 | 9.192  | 6.213  | 5.737  | 8.393  | 16.004 |
| 11 | 0.4780 | 4.855  | 4.748  | 3.269  | 4.198  | 3.893  |
| 11 | 0.4790 | 8.017  | 7.223  | 8.181  | 5.774  | 7.289  |
| 11 | 0.4800 | 11.401 | 7.547  | 12.867 | 19.617 | 7.448  |
| 11 | 0.4810 | 8.247  | 12.410 | 12.572 | 20.121 | 19.597 |
| 11 | 0.4820 | 3.316  | 12.765 | 8.858  | 14.563 | 14.331 |
| 11 | 0.4830 | 6.720  | 11.217 | 11.859 | 14.569 | 22.417 |
| 11 | 0.4840 | 8.165  | 13.225 | 16.119 | 6.037  | 15.329 |
| 11 | 0.4850 | 7.297  | 8.733  | 8.584  | 14.184 | 20.997 |
| 11 | 0.4860 | 2.071  | 3.333  | 1.103  | 10.716 | 7.918  |
| 11 | 0.4870 | 7.978  | 8.510  | 8.775  | 6.978  | 18.849 |
| 11 | 0.4880 | 4.926  | 3.570  | 6.865  | 7.147  | 10.580 |
| 11 | 0.4890 | 4.520  | 3.607  | 9.297  | 4.681  | 6.297  |
| 11 | 0.4900 | 7.212  | 4.102  | 5.989  | 4.639  | 7.032  |
| 11 | 0.4910 | 15.039 | 14.843 | 18.711 | 15.485 | 24.785 |
| 11 | 0.4920 | 6.495  | 5.074  | 7.386  | 12.074 | 18.547 |
| 11 | 0.4930 | 2.940  | 2.223  | 1.916  | 3.318  | 15.612 |
| 11 | 0.4940 | 2.667  | 2.371  | 3.390  | 8.495  | 7.663  |
| 11 | 0.4950 | 9.882  | 12.404 | 10.626 | 19.752 | 21.962 |

|    |        |        |        |        |        |        |
|----|--------|--------|--------|--------|--------|--------|
| 11 | 0.4960 | 10.699 | 13.266 | 14.080 | 11.015 | 21.319 |
| 11 | 0.4970 | 13.153 | 11.457 | 14.841 | 13.287 | 16.678 |
| 11 | 0.4980 | 9.992  | 14.526 | 4.873  | 12.316 | 20.855 |
| 11 | 0.4990 | 13.251 | 14.166 | 14.078 | 11.568 | 20.519 |
| 11 | 0.5000 | 15.940 | 14.695 | 15.682 | 5.237  | 16.281 |
| 11 | 0.5010 | 14.922 | 15.546 | 14.808 | 15.443 | 10.152 |
| 11 | 0.5020 | 10.287 | 13.881 | 12.570 | 11.027 | 13.532 |
| 11 | 0.5030 | 8.842  | 9.256  | 9.078  | 9.232  | 15.718 |
| 11 | 0.5040 | 12.090 | 7.615  | 18.799 | 10.701 | 7.467  |
| 11 | 0.5050 | 12.450 | 6.382  | 9.691  | 9.133  | 8.840  |
| 11 | 0.5060 | 18.131 | 12.006 | 12.295 | 12.260 | 12.831 |
| 11 | 0.5070 | 8.924  | 6.647  | 11.243 | 12.019 | 10.463 |
| 11 | 0.5080 | 6.288  | 8.793  | 12.054 | 11.030 | 8.344  |
| 11 | 0.5090 | 2.208  | 7.774  | 8.054  | 7.571  | 11.017 |
| 11 | 0.5100 | 6.321  | 6.640  | 10.673 | 8.862  | 13.621 |
| 11 | 0.5110 | 6.520  | 3.518  | 15.301 | 9.105  | 14.743 |
| 11 | 0.5120 | 9.275  | 11.785 | 15.629 | 8.887  | 17.680 |
| 11 | 0.5130 | 5.116  | 8.210  | 7.074  | 2.954  | 11.101 |
| 11 | 0.5140 | 3.292  | 13.751 | 3.573  | 8.822  | 9.871  |
| 11 | 0.5150 | 3.056  | 8.518  | 8.489  | 8.711  | 22.219 |
| 11 | 0.5160 | 7.900  | 12.240 | 12.088 | 8.823  | 15.277 |
| 11 | 0.5170 | 9.913  | 8.145  | 15.037 | 4.220  | 16.152 |
| 11 | 0.5180 | 4.740  | 4.531  | 9.328  | 2.936  | 11.104 |
| 11 | 0.5190 | 10.341 | 14.438 | 11.403 | 14.577 | 19.610 |
| 11 | 0.5200 | 3.357  | 4.828  | 2.557  | 5.486  | 6.384  |
| 11 | 0.5210 | 6.287  | 7.709  | 10.493 | 5.754  | 9.162  |
| 11 | 0.5220 | 7.272  | 7.151  | 7.354  | 10.406 | 15.250 |
| 11 | 0.5230 | 7.272  | 7.150  | 7.353  | 10.416 | 15.250 |
| 11 | 0.5240 | 3.898  | 5.690  | 6.689  | 9.092  | 24.128 |
| 11 | 0.5250 | 9.143  | 15.554 | 13.667 | 10.873 | 21.880 |
| 11 | 0.5260 | 7.092  | 6.917  | 14.248 | 17.415 | 17.680 |
| 11 | 0.5270 | 15.391 | 17.284 | 16.774 | 21.971 | 13.330 |
| 11 | 0.5280 | 18.620 | 17.308 | 20.828 | 9.739  | 20.479 |
| 11 | 0.5290 | 14.721 | 15.937 | 19.822 | 6.083  | 18.413 |
| 11 | 0.5300 | 12.759 | 15.624 | 12.554 | 13.613 | 19.161 |
| 11 | 0.5310 | 11.862 | 8.071  | 11.250 | 16.356 | 15.469 |
| 11 | 0.5320 | 10.527 | 6.462  | 10.628 | 6.343  | 14.945 |
| 11 | 0.5330 | 8.941  | 7.761  | 12.103 | 4.444  | 18.239 |
| 11 | 0.5340 | 16.280 | 13.021 | 16.013 | 12.596 | 24.646 |
| 11 | 0.5350 | 7.852  | 12.424 | 6.253  | 26.905 | 23.383 |
| 11 | 0.5360 | 8.350  | 7.936  | 10.847 | 11.268 | 17.093 |
| 11 | 0.5370 | 11.877 | 10.091 | 12.694 | 17.521 | 14.845 |
| 11 | 0.5380 | 8.252  | 11.138 | 9.231  | 15.755 | 19.144 |
| 11 | 0.5390 | 23.025 | 17.338 | 12.724 | 19.479 | 21.621 |
| 11 | 0.5400 | 11.876 | 20.143 | 14.991 | 16.235 | 13.691 |
| 11 | 0.5410 | 22.947 | 24.701 | 22.083 | 9.689  | 8.987  |
| 11 | 0.5420 | 6.331  | 5.539  | 15.535 | 9.729  | 7.269  |
| 11 | 0.5430 | 22.235 | 15.306 | 22.922 | 9.903  | 10.737 |
| 11 | 0.5440 | 17.650 | 17.524 | 14.667 | 22.979 | 13.967 |
| 11 | 0.5450 | 18.278 | 12.658 | 11.651 | 4.411  | 19.986 |



|    |        |        |        |        |        |        |
|----|--------|--------|--------|--------|--------|--------|
| 11 | 0.5460 | 11.850 | 18.482 | 15.899 | 17.333 | 20.036 |
| 11 | 0.5470 | 8.684  | 10.226 | 7.913  | 12.460 | 18.186 |
| 11 | 0.5480 | 10.005 | 12.712 | 13.474 | 9.739  | 16.959 |
| 11 | 0.5490 | 11.932 | 15.886 | 14.952 | 7.321  | 19.661 |
| 11 | 0.5500 | 10.601 | 12.097 | 10.963 | 11.838 | 19.122 |
| 11 | 0.5510 | 10.848 | 13.569 | 18.542 | 10.002 | 14.179 |
| 11 | 0.5520 | 12.133 | 11.874 | 13.958 | 12.692 | 12.967 |
| 11 | 0.5530 | 20.644 | 15.078 | 27.599 | 18.342 | 20.415 |
| 11 | 0.5540 | 31.699 | 21.458 | 34.760 | 8.322  | 16.116 |
| 11 | 0.5550 | 16.400 | 14.297 | 17.772 | 12.973 | 8.516  |
| 11 | 0.5560 | 18.289 | 17.824 | 20.058 | 8.686  | 14.984 |
| 11 | 0.5570 | 13.381 | 17.863 | 15.397 | 19.608 | 16.092 |
| 11 | 0.5580 | 25.277 | 11.343 | 24.543 | 19.257 | 13.658 |
| 11 | 0.5590 | 21.159 | 10.784 | 25.823 | 23.495 | 12.218 |
| 11 | 0.5600 | 13.380 | 7.173  | 13.100 | 23.835 | 6.301  |
| 11 | 0.5610 | 5.455  | 8.050  | 6.944  | 8.924  | 12.807 |
| 11 | 0.5620 | 17.863 | 13.059 | 13.198 | 7.952  | 22.173 |
| 11 | 0.5630 | 11.579 | 10.168 | 9.996  | 14.101 | 19.341 |
| 11 | 0.5640 | 10.242 | 6.771  | 12.552 | 12.260 | 10.672 |
| 11 | 0.5650 | 9.966  | 5.296  | 11.000 | 9.139  | 7.877  |
| 11 | 0.5660 | 10.086 | 8.533  | 11.204 | 9.715  | 15.154 |
| 11 | 0.5670 | 18.162 | 15.897 | 21.080 | 16.453 | 17.568 |
| 11 | 0.5680 | 10.802 | 11.382 | 12.384 | 12.574 | 19.732 |
| 11 | 0.5690 | 15.980 | 13.605 | 13.169 | 12.959 | 11.638 |
| 11 | 0.5700 | 9.737  | 12.313 | 13.067 | 6.948  | 7.428  |
| 11 | 0.5710 | 14.001 | 12.805 | 16.509 | 11.077 | 14.820 |
| 11 | 0.5720 | 32.540 | 27.723 | 28.842 | 17.969 | 24.822 |
| 11 | 0.5730 | 26.037 | 24.655 | 28.415 | 13.639 | 14.505 |
| 11 | 0.5740 | 15.621 | 15.778 | 15.836 | 12.676 | 15.927 |
| 11 | 0.5750 | 16.012 | 14.383 | 14.354 | 6.131  | 18.466 |
| 11 | 0.5760 | 7.654  | 9.543  | 11.867 | 7.358  | 16.051 |
| 11 | 0.5770 | 11.631 | 14.362 | 13.194 | 13.455 | 11.692 |
| 11 | 0.5780 | 21.723 | 21.018 | 19.835 | 18.182 | 14.596 |
| 11 | 0.5790 | 10.955 | 13.109 | 11.770 | 10.155 | 6.330  |
| 11 | 0.5800 | 4.521  | 3.963  | 5.358  | 13.815 | 14.043 |
| 11 | 0.5810 | 12.513 | 13.611 | 8.541  | 14.586 | 13.909 |
| 11 | 0.5820 | 14.376 | 14.387 | 11.108 | 14.537 | 15.221 |
| 11 | 0.5830 | 17.400 | 20.840 | 12.085 | 12.569 | 16.536 |
| 11 | 0.5840 | 14.948 | 14.493 | 10.020 | 10.415 | 15.384 |
| 11 | 0.5850 | 5.648  | 9.705  | 12.114 | 20.057 | 21.429 |
| 11 | 0.5860 | 6.628  | 5.885  | 10.881 | 19.801 | 20.623 |
| 11 | 0.5870 | 5.346  | 5.735  | 8.255  | 10.589 | 14.834 |
| 11 | 0.5880 | 11.863 | 13.538 | 21.750 | 9.101  | 7.740  |
| 11 | 0.5890 | 7.897  | 7.726  | 9.495  | 7.736  | 5.749  |
| 11 | 0.5900 | 10.774 | 8.247  | 12.198 | 9.656  | 10.517 |
| 11 | 0.5910 | 12.526 | 7.660  | 15.192 | 7.070  | 13.161 |
| 11 | 0.5920 | 13.834 | 10.254 | 14.477 | 13.486 | 10.011 |
| 11 | 0.5930 | 2.808  | 5.848  | 5.453  | 17.364 | 15.925 |
| 11 | 0.5940 | 11.992 | 5.346  | 8.036  | 26.540 | 16.016 |
| 11 | 0.5950 | 3.961  | 6.523  | 5.234  | 6.699  | 8.977  |

|    |        |        |        |        |        |        |
|----|--------|--------|--------|--------|--------|--------|
| 11 | 0.5960 | 12.463 | 12.559 | 15.018 | 11.478 | 4.672  |
| 11 | 0.5970 | 8.053  | 6.456  | 7.803  | 12.415 | 12.858 |
| 11 | 0.5980 | 7.627  | 7.122  | 9.641  | 23.171 | 18.428 |
| 11 | 0.5990 | 18.740 | 25.673 | 24.544 | 19.408 | 19.310 |
| 11 | 0.6000 | 11.819 | 14.155 | 17.061 | 10.773 | 13.297 |
| 11 | 0.6010 | 17.322 | 19.091 | 18.469 | 7.659  | 13.517 |
| 11 | 0.6020 | 22.909 | 22.726 | 25.300 | 7.786  | 14.593 |
| 11 | 0.6030 | 17.228 | 19.453 | 16.725 | 15.528 | 19.929 |
| 11 | 0.6040 | 15.006 | 16.309 | 15.425 | 9.839  | 15.623 |
| 11 | 0.6050 | 3.305  | 2.339  | 5.050  | 1.815  | 4.424  |
| 11 | 0.6060 | 3.285  | 2.196  | 5.007  | 2.281  | 4.829  |
| 11 | 0.6070 | 5.721  | 5.639  | 8.091  | 9.881  | 6.916  |
| 11 | 0.6080 | 3.970  | 8.538  | 4.242  | 15.969 | 6.379  |
| 11 | 0.6090 | 7.867  | 7.382  | 8.500  | 21.756 | 18.869 |
| 11 | 0.6100 | 7.629  | 6.331  | 9.245  | 11.944 | 12.060 |
| 11 | 0.6110 | 1.450  | 4.543  | 2.042  | 12.514 | 13.023 |
| 11 | 0.6120 | 6.047  | 5.317  | 10.843 | 16.909 | 11.971 |
| 11 | 0.6130 | 6.662  | 6.447  | 8.163  | 6.072  | 13.680 |
| 11 | 0.6140 | 9.106  | 8.749  | 9.526  | 13.176 | 8.566  |
| 11 | 0.6150 | 11.980 | 8.473  | 16.050 | 11.440 | 12.381 |
| 11 | 0.6160 | 8.868  | 10.627 | 8.293  | 8.523  | 12.268 |
| 11 | 0.6170 | 6.540  | 11.228 | 8.249  | 13.931 | 9.854  |
| 11 | 0.6180 | 6.538  | 11.228 | 8.246  | 13.882 | 9.845  |
| 11 | 0.6190 | 4.661  | 6.632  | 11.600 | 12.158 | 12.050 |
| 11 | 0.6200 | 9.289  | 10.134 | 13.653 | 12.762 | 12.792 |
| 11 | 0.6210 | 9.089  | 8.809  | 15.788 | 12.048 | 16.301 |
| 11 | 0.6220 | 11.953 | 8.434  | 13.524 | 17.851 | 18.407 |
| 11 | 0.6230 | 18.217 | 10.876 | 13.554 | 15.135 | 14.088 |
| 11 | 0.6240 | 12.779 | 11.260 | 7.727  | 9.673  | 14.863 |
| 11 | 0.6250 | 18.590 | 9.411  | 12.308 | 11.879 | 21.971 |
| 11 | 0.6260 | 18.648 | 15.982 | 13.895 | 13.012 | 17.479 |
| 11 | 0.6270 | 19.235 | 17.197 | 15.455 | 11.074 | 19.061 |
| 11 | 0.6280 | 14.409 | 10.755 | 13.517 | 22.391 | 17.770 |
| 11 | 0.6290 | 12.469 | 10.318 | 10.075 | 9.881  | 15.590 |
| 11 | 0.6300 | 10.952 | 12.696 | 12.651 | 11.408 | 19.190 |
| 11 | 0.6310 | 9.225  | 8.496  | 9.164  | 10.944 | 11.630 |
| 11 | 0.6320 | 4.160  | 5.979  | 5.731  | 7.340  | 12.118 |
| 11 | 0.6330 | 4.888  | 10.162 | 12.627 | 14.265 | 20.901 |
| 11 | 0.6340 | 4.569  | 3.511  | 7.418  | 16.432 | 21.113 |
| 11 | 0.6350 | 1.795  | 1.817  | 3.567  | 9.554  | 13.744 |
| 11 | 0.6360 | 5.109  | 4.242  | 4.199  | 15.774 | 16.066 |
| 11 | 0.6370 | 8.405  | 7.411  | 7.214  | 11.408 | 25.999 |
| 11 | 0.6380 | 9.721  | 8.550  | 8.151  | 9.286  | 16.726 |
| 11 | 0.6390 | 5.952  | 7.081  | 8.666  | 6.818  | 11.050 |
| 11 | 0.6400 | 4.026  | 4.288  | 4.481  | 3.794  | 11.167 |
| 11 | 0.6410 | 6.770  | 8.249  | 15.306 | 7.922  | 14.954 |
| 11 | 0.6420 | 7.944  | 5.289  | 9.122  | 10.389 | 15.922 |
| 11 | 0.6430 | 8.998  | 11.252 | 13.027 | 7.560  | 14.072 |
| 11 | 0.6440 | 8.081  | 4.886  | 10.279 | 10.662 | 8.059  |
| 11 | 0.6450 | 10.370 | 6.659  | 9.582  | 12.139 | 19.140 |

|    |        |        |        |        |        |        |
|----|--------|--------|--------|--------|--------|--------|
| 11 | 0.6460 | 9.484  | 8.924  | 8.870  | 15.484 | 21.437 |
| 11 | 0.6470 | 13.623 | 15.721 | 16.932 | 23.098 | 11.734 |
| 11 | 0.6480 | 12.203 | 13.480 | 9.564  | 22.410 | 20.072 |
| 11 | 0.6490 | 10.651 | 6.326  | 14.787 | 12.313 | 10.831 |
| 11 | 0.6500 | 17.121 | 10.624 | 19.339 | 20.545 | 8.319  |
| 11 | 0.6510 | 9.408  | 7.414  | 12.178 | 5.675  | 20.115 |
| 11 | 0.6520 | 10.212 | 5.472  | 12.929 | 16.491 | 18.296 |
| 11 | 0.6530 | 7.022  | 10.912 | 16.936 | 7.496  | 16.825 |
| 11 | 0.6540 | 6.942  | 10.721 | 16.747 | 7.411  | 16.766 |
| 11 | 0.6550 | 8.730  | 15.923 | 18.264 | 7.799  | 20.138 |
| 11 | 0.6560 | 13.337 | 15.782 | 15.056 | 11.494 | 23.259 |
| 11 | 0.6570 | 16.576 | 11.538 | 9.530  | 18.942 | 21.375 |
| 11 | 0.6580 | 10.095 | 8.549  | 7.498  | 12.019 | 10.604 |
| 11 | 0.6590 | 16.476 | 15.053 | 17.502 | 18.818 | 25.229 |
| 11 | 0.6600 | 15.091 | 10.915 | 16.116 | 12.955 | 21.314 |
| 11 | 0.6610 | 8.665  | 8.203  | 12.296 | 8.657  | 21.351 |
| 11 | 0.6620 | 11.895 | 15.809 | 10.852 | 12.118 | 15.302 |
| 11 | 0.6630 | 12.915 | 10.844 | 12.925 | 10.750 | 8.806  |
| 11 | 0.6640 | 9.090  | 8.510  | 9.101  | 8.629  | 9.170  |
| 11 | 0.6650 | 5.988  | 2.691  | 3.846  | 5.776  | 10.344 |
| 11 | 0.6660 | 11.522 | 8.289  | 9.961  | 12.370 | 10.831 |
| 11 | 0.6670 | 7.503  | 4.285  | 8.117  | 5.373  | 6.466  |
| 11 | 0.6680 | 23.752 | 19.222 | 20.495 | 13.150 | 9.724  |
| 11 | 0.6690 | 17.403 | 15.922 | 17.817 | 7.603  | 11.819 |
| 11 | 0.6700 | 15.119 | 9.588  | 15.393 | 9.217  | 11.380 |
| 11 | 0.6710 | 13.289 | 9.474  | 21.558 | 11.786 | 14.210 |
| 11 | 0.6720 | 8.539  | 5.937  | 11.446 | 11.720 | 10.115 |
| 11 | 0.6730 | 17.332 | 13.869 | 22.613 | 17.917 | 19.197 |
| 11 | 0.6740 | 14.489 | 13.259 | 14.756 | 8.625  | 11.094 |
| 11 | 0.6750 | 18.827 | 9.799  | 22.405 | 10.181 | 12.219 |
| 11 | 0.6760 | 8.495  | 4.296  | 11.534 | 7.825  | 9.974  |
| 11 | 0.6770 | 10.999 | 12.071 | 13.259 | 11.383 | 10.116 |
| 11 | 0.6780 | 10.961 | 16.157 | 15.558 | 13.517 | 12.926 |
| 11 | 0.6790 | 9.480  | 6.627  | 9.235  | 10.919 | 10.574 |
| 11 | 0.6800 | 18.646 | 15.279 | 17.802 | 13.995 | 10.424 |
| 11 | 0.6810 | 7.743  | 10.310 | 7.774  | 9.873  | 19.541 |
| 11 | 0.6820 | 4.861  | 7.840  | 5.192  | 10.634 | 12.855 |
| 11 | 0.6830 | 11.510 | 11.904 | 13.217 | 9.761  | 15.524 |
| 11 | 0.6840 | 7.693  | 9.460  | 7.694  | 9.862  | 12.746 |
| 11 | 0.6850 | 14.337 | 13.172 | 13.529 | 13.871 | 17.357 |
| 11 | 0.6860 | 13.320 | 10.763 | 16.494 | 16.705 | 19.977 |
| 11 | 0.6870 | 12.386 | 7.783  | 19.105 | 4.805  | 10.509 |
| 11 | 0.6880 | 6.555  | 5.967  | 7.628  | 5.794  | 14.769 |
| 11 | 0.6890 | 2.737  | 2.355  | 1.500  | 7.926  | 7.193  |
| 11 | 0.6900 | 19.087 | 20.020 | 17.011 | 17.464 | 13.709 |
| 11 | 0.6910 | 13.546 | 6.141  | 9.499  | 17.613 | 14.357 |
| 11 | 0.6920 | 13.976 | 9.862  | 13.517 | 14.962 | 14.359 |
| 11 | 0.6930 | 14.569 | 16.056 | 17.776 | 5.336  | 12.655 |
| 11 | 0.6940 | 16.909 | 17.930 | 18.524 | 6.863  | 15.432 |
| 11 | 0.6950 | 1.999  | 1.709  | 1.353  | 5.227  | 6.423  |

|    |        |        |        |        |        |        |
|----|--------|--------|--------|--------|--------|--------|
| 11 | 0.6960 | 5.462  | 4.792  | 4.896  | 5.317  | 10.206 |
| 11 | 0.6970 | 5.885  | 5.411  | 5.789  | 12.399 | 9.737  |
| 11 | 0.6980 | 10.176 | 7.520  | 10.867 | 16.951 | 10.629 |
| 11 | 0.6990 | 12.975 | 14.477 | 11.880 | 14.495 | 10.822 |
| 11 | 0.7000 | 15.468 | 11.483 | 17.377 | 11.370 | 18.938 |
| 11 | 0.7010 | 18.512 | 19.146 | 22.922 | 4.781  | 7.614  |
| 11 | 0.7020 | 14.864 | 14.886 | 16.623 | 13.668 | 18.042 |
| 11 | 0.7030 | 6.780  | 9.892  | 7.410  | 12.881 | 12.580 |
| 11 | 0.7040 | 5.064  | 4.678  | 5.560  | 8.505  | 6.403  |
| 11 | 0.7050 | 4.765  | 5.749  | 7.428  | 4.049  | 4.715  |
| 11 | 0.7060 | 7.359  | 8.776  | 10.393 | 4.850  | 6.207  |
| 11 | 0.7070 | 12.450 | 13.743 | 18.256 | 12.725 | 13.707 |
| 11 | 0.7080 | 9.172  | 8.865  | 14.594 | 8.810  | 11.127 |
| 11 | 0.7090 | 0.690  | 1.382  | 0.852  | 2.844  | 1.319  |
| 11 | 0.7100 | 8.352  | 7.568  | 9.636  | 5.252  | 2.419  |
| 11 | 0.7110 | 9.624  | 6.532  | 8.932  | 3.509  | 3.252  |
| 11 | 0.7120 | 12.990 | 9.723  | 7.357  | 8.134  | 6.931  |
| 11 | 0.7130 | 22.524 | 19.674 | 26.284 | 14.654 | 9.457  |
| 11 | 0.7140 | 9.735  | 6.972  | 11.771 | 9.221  | 8.711  |
| 11 | 0.7150 | 19.549 | 16.326 | 13.001 | 10.472 | 8.246  |
| 11 | 0.7160 | 9.056  | 11.696 | 15.689 | 6.439  | 2.534  |
| 11 | 0.7170 | 8.821  | 7.978  | 10.573 | 6.909  | 5.728  |
| 11 | 0.7180 | 6.797  | 4.067  | 8.958  | 4.730  | 11.810 |
| 11 | 0.7190 | 16.468 | 14.099 | 20.994 | 16.009 | 11.907 |
| 11 | 0.7200 | 13.674 | 9.523  | 18.892 | 8.802  | 8.576  |
| 11 | 0.7210 | 18.154 | 11.917 | 14.871 | 16.394 | 19.038 |
| 11 | 0.7220 | 8.660  | 3.259  | 6.459  | 7.031  | 5.456  |
| 11 | 0.7230 | 3.889  | 4.528  | 4.676  | 3.807  | 9.330  |
| 11 | 0.7240 | 15.660 | 12.675 | 13.778 | 11.840 | 8.373  |
| 11 | 0.7250 | 17.678 | 21.245 | 21.648 | 16.590 | 9.150  |
| 11 | 0.7260 | 5.101  | 4.109  | 5.283  | 5.399  | 7.004  |
| 11 | 0.7270 | 18.101 | 17.221 | 21.072 | 8.179  | 10.725 |
| 11 | 0.7280 | 19.258 | 17.291 | 11.513 | 24.875 | 14.779 |
| 11 | 0.7290 | 25.560 | 20.422 | 23.984 | 17.634 | 11.557 |
| 11 | 0.7300 | 13.808 | 8.729  | 11.971 | 20.797 | 9.757  |
| 11 | 0.7310 | 13.795 | 8.746  | 11.968 | 20.862 | 9.762  |
| 11 | 0.7320 | 5.018  | 4.236  | 7.997  | 11.920 | 9.513  |
| 11 | 0.7330 | 8.308  | 2.880  | 12.953 | 7.854  | 7.833  |
| 11 | 0.7340 | 5.687  | 7.504  | 11.558 | 7.430  | 9.054  |
| 11 | 0.7350 | 11.462 | 12.683 | 13.550 | 20.127 | 11.630 |
| 11 | 0.7360 | 7.698  | 8.974  | 8.213  | 18.574 | 11.101 |
| 11 | 0.7370 | 7.096  | 8.619  | 5.986  | 16.617 | 8.693  |
| 11 | 0.7380 | 6.125  | 13.831 | 11.518 | 12.353 | 2.927  |
| 11 | 0.7390 | 5.107  | 6.753  | 4.635  | 11.479 | 5.450  |
| 11 | 0.7400 | 12.488 | 6.350  | 11.084 | 12.826 | 6.473  |
| 11 | 0.7410 | 10.651 | 7.342  | 7.938  | 6.409  | 10.411 |
| 11 | 0.7420 | 13.293 | 9.962  | 13.239 | 10.340 | 6.184  |
| 11 | 0.7430 | 12.468 | 12.835 | 13.724 | 27.424 | 6.900  |
| 11 | 0.7440 | 13.787 | 8.634  | 12.023 | 17.642 | 9.518  |
| 11 | 0.7450 | 20.244 | 12.364 | 14.384 | 15.340 | 14.851 |

|    |        |        |        |        |        |        |
|----|--------|--------|--------|--------|--------|--------|
| 11 | 0.7460 | 8.474  | 7.369  | 10.716 | 19.044 | 12.844 |
| 11 | 0.7470 | 13.032 | 11.450 | 11.643 | 12.793 | 10.654 |
| 11 | 0.7480 | 16.267 | 6.286  | 11.008 | 10.901 | 7.838  |
| 11 | 0.7490 | 14.857 | 10.852 | 10.954 | 21.007 | 9.263  |
| 11 | 0.7500 | 7.316  | 8.266  | 10.083 | 16.868 | 6.386  |
| 11 | 0.7510 | 13.518 | 5.712  | 17.011 | 16.751 | 13.147 |
| 11 | 0.7520 | 19.488 | 15.492 | 23.645 | 7.032  | 5.861  |
| 11 | 0.7530 | 23.582 | 15.434 | 19.988 | 13.178 | 6.273  |
| 11 | 0.7540 | 7.990  | 6.843  | 7.358  | 18.907 | 5.824  |
| 11 | 0.7550 | 9.773  | 5.694  | 6.077  | 8.225  | 7.790  |
| 11 | 0.7560 | 13.183 | 10.668 | 13.052 | 14.783 | 10.804 |
| 11 | 0.7570 | 8.935  | 10.469 | 14.694 | 12.638 | 11.335 |
| 11 | 0.7580 | 12.236 | 8.842  | 14.959 | 11.866 | 15.102 |
| 11 | 0.7590 | 12.419 | 9.185  | 14.033 | 10.552 | 11.516 |
| 11 | 0.7600 | 15.049 | 11.246 | 16.053 | 7.248  | 14.191 |
| 11 | 0.7610 | 16.878 | 12.955 | 15.235 | 11.249 | 8.929  |
| 11 | 0.7620 | 17.984 | 16.841 | 21.517 | 19.614 | 9.445  |
| 11 | 0.7630 | 17.796 | 13.279 | 17.635 | 5.099  | 4.527  |
| 11 | 0.7640 | 9.636  | 15.188 | 14.277 | 15.086 | 8.775  |
| 11 | 0.7650 | 21.660 | 25.371 | 30.414 | 8.100  | 5.713  |
| 11 | 0.7660 | 14.502 | 19.996 | 18.583 | 17.915 | 12.517 |
| 11 | 0.7670 | 14.067 | 19.959 | 18.290 | 17.981 | 12.149 |
| 11 | 0.7680 | 17.138 | 19.955 | 18.175 | 19.728 | 10.181 |
| 11 | 0.7690 | 25.869 | 24.751 | 28.860 | 17.111 | 6.852  |
| 11 | 0.7700 | 15.492 | 15.031 | 23.295 | 14.574 | 9.034  |
| 11 | 0.7710 | 24.538 | 9.706  | 21.904 | 23.410 | 4.841  |
| 11 | 0.7720 | 12.283 | 10.597 | 12.555 | 9.701  | 17.209 |
| 11 | 0.7730 | 9.498  | 10.175 | 10.556 | 18.680 | 11.903 |
| 11 | 0.7740 | 4.063  | 4.604  | 4.379  | 10.515 | 8.330  |
| 11 | 0.7750 | 13.796 | 9.740  | 18.381 | 14.546 | 5.643  |
| 11 | 0.7760 | 19.130 | 17.267 | 28.373 | 21.676 | 12.765 |
| 11 | 0.7770 | 9.200  | 5.277  | 12.078 | 17.640 | 12.137 |
| 11 | 0.7780 | 11.006 | 4.446  | 11.387 | 15.200 | 6.457  |
| 11 | 0.7790 | 12.976 | 10.070 | 13.000 | 15.433 | 11.104 |
| 11 | 0.7800 | 26.820 | 13.206 | 19.818 | 11.603 | 17.910 |
| 11 | 0.7810 | 14.427 | 13.483 | 15.218 | 7.374  | 19.999 |
| 11 | 0.7820 | 15.506 | 11.904 | 17.918 | 15.837 | 6.648  |
| 11 | 0.7830 | 13.394 | 13.468 | 13.783 | 23.667 | 11.571 |
| 11 | 0.7840 | 11.485 | 14.617 | 14.705 | 15.260 | 9.270  |
| 11 | 0.7850 | 7.460  | 5.199  | 5.236  | 13.716 | 9.189  |
| 11 | 0.7860 | 14.451 | 14.010 | 18.625 | 13.963 | 8.384  |
| 11 | 0.7870 | 14.298 | 15.754 | 18.496 | 20.847 | 22.278 |
| 11 | 0.7880 | 11.012 | 14.395 | 16.108 | 9.552  | 9.846  |
| 11 | 0.7890 | 20.309 | 27.000 | 25.696 | 11.214 | 11.896 |
| 11 | 0.7900 | 17.449 | 27.935 | 27.010 | 6.608  | 8.164  |
| 11 | 0.7910 | 19.959 | 32.543 | 27.829 | 21.451 | 16.963 |
| 11 | 0.7920 | 14.863 | 23.389 | 19.836 | 24.947 | 24.379 |
| 11 | 0.7930 | 13.225 | 7.948  | 12.847 | 13.221 | 19.853 |
| 11 | 0.7940 | 17.389 | 9.705  | 17.479 | 21.778 | 26.715 |
| 11 | 0.7950 | 7.654  | 10.657 | 9.913  | 17.828 | 17.969 |

|    |        |        |        |        |        |        |
|----|--------|--------|--------|--------|--------|--------|
| 11 | 0.7960 | 9.860  | 14.336 | 10.261 | 18.779 | 14.840 |
| 11 | 0.7970 | 15.356 | 22.200 | 23.880 | 12.649 | 11.221 |
| 11 | 0.7980 | 15.027 | 18.170 | 15.597 | 14.671 | 9.858  |
| 11 | 0.7990 | 17.208 | 16.110 | 15.756 | 15.982 | 22.370 |
| 11 | 0.8000 | 14.861 | 16.192 | 16.437 | 14.064 | 16.650 |
| 11 | 0.8010 | 14.833 | 16.157 | 16.506 | 14.058 | 16.567 |
| 11 | 0.8020 | 17.572 | 19.357 | 18.903 | 15.134 | 17.007 |
| 11 | 0.8030 | 12.253 | 15.474 | 16.606 | 14.932 | 10.387 |
| 11 | 0.8040 | 13.832 | 15.136 | 14.433 | 13.640 | 11.885 |
| 11 | 0.8050 | 13.811 | 10.675 | 14.500 | 19.409 | 12.337 |
| 11 | 0.8060 | 7.604  | 7.064  | 6.974  | 8.029  | 4.003  |
| 11 | 0.8070 | 9.966  | 7.811  | 7.741  | 6.883  | 1.331  |
| 11 | 0.8080 | 25.329 | 26.644 | 27.988 | 17.701 | 13.959 |
| 11 | 0.8090 | 21.078 | 19.847 | 22.635 | 16.677 | 14.374 |
| 11 | 0.8100 | 26.426 | 33.458 | 31.354 | 10.876 | 11.185 |
| 11 | 0.8110 | 11.872 | 14.666 | 15.826 | 13.291 | 10.804 |
| 11 | 0.8120 | 11.872 | 14.639 | 15.808 | 13.244 | 10.777 |
| 11 | 0.8130 | 17.044 | 20.481 | 14.686 | 18.107 | 11.393 |
| 11 | 0.8140 | 14.729 | 9.619  | 17.437 | 14.939 | 13.718 |
| 11 | 0.8150 | 13.017 | 8.168  | 11.012 | 8.990  | 12.321 |
| 11 | 0.8160 | 12.116 | 13.235 | 14.710 | 15.700 | 10.792 |
| 11 | 0.8170 | 12.166 | 12.352 | 14.914 | 6.646  | 6.840  |
| 11 | 0.8180 | 10.271 | 6.553  | 9.509  | 9.150  | 8.443  |
| 11 | 0.8190 | 13.159 | 9.041  | 15.972 | 4.610  | 5.138  |
| 11 | 0.8200 | 9.285  | 10.946 | 8.885  | 9.367  | 12.958 |
| 11 | 0.8210 | 11.267 | 9.242  | 8.957  | 13.363 | 14.831 |
| 11 | 0.8220 | 14.447 | 14.940 | 13.114 | 16.864 | 15.860 |
| 11 | 0.8230 | 16.269 | 25.944 | 18.803 | 17.255 | 17.240 |
| 11 | 0.8240 | 20.688 | 17.746 | 16.275 | 22.161 | 16.655 |
| 11 | 0.8250 | 21.626 | 15.955 | 22.848 | 12.339 | 5.676  |
| 11 | 0.8260 | 21.724 | 16.017 | 22.871 | 12.414 | 5.596  |
| 11 | 0.8270 | 18.023 | 17.404 | 22.762 | 13.721 | 12.659 |
| 11 | 0.8280 | 12.981 | 14.477 | 16.130 | 15.030 | 8.725  |
| 11 | 0.8290 | 18.927 | 14.145 | 19.716 | 9.484  | 9.107  |
| 11 | 0.8300 | 17.207 | 12.492 | 15.833 | 11.078 | 2.079  |
| 11 | 0.8310 | 22.681 | 16.420 | 18.836 | 20.505 | 10.623 |
| 11 | 0.8320 | 12.247 | 12.201 | 10.489 | 15.652 | 7.406  |
| 11 | 0.8330 | 13.890 | 11.364 | 9.369  | 8.376  | 9.672  |
| 11 | 0.8340 | 14.922 | 6.189  | 14.379 | 9.196  | 6.591  |
| 11 | 0.8350 | 12.504 | 7.238  | 10.186 | 4.191  | 7.027  |
| 11 | 0.8360 | 7.664  | 5.170  | 8.152  | 10.653 | 4.897  |
| 11 | 0.8370 | 8.280  | 10.507 | 10.051 | 11.963 | 8.609  |
| 11 | 0.8380 | 16.115 | 15.382 | 13.949 | 28.801 | 14.390 |
| 11 | 0.8390 | 10.791 | 9.617  | 7.359  | 19.561 | 23.881 |
| 11 | 0.8400 | 11.529 | 11.864 | 13.277 | 15.124 | 12.586 |
| 11 | 0.8410 | 6.055  | 7.498  | 6.125  | 10.730 | 19.498 |
| 11 | 0.8420 | 10.420 | 6.830  | 8.137  | 13.970 | 17.216 |
| 11 | 0.8430 | 14.044 | 12.104 | 15.303 | 24.546 | 13.876 |
| 11 | 0.8440 | 17.562 | 9.551  | 15.321 | 17.119 | 5.437  |
| 11 | 0.8450 | 19.326 | 20.378 | 17.787 | 23.911 | 12.839 |

|    |        |        |        |        |        |        |
|----|--------|--------|--------|--------|--------|--------|
| 11 | 0.8460 | 11.506 | 8.555  | 12.714 | 5.985  | 6.329  |
| 11 | 0.8470 | 28.323 | 14.639 | 23.894 | 5.859  | 4.361  |
| 11 | 0.8480 | 25.123 | 12.518 | 23.002 | 5.291  | 7.573  |
| 11 | 0.8490 | 18.218 | 12.204 | 18.128 | 6.109  | 6.123  |
| 11 | 0.8500 | 16.381 | 8.246  | 14.340 | 19.711 | 9.431  |
| 11 | 0.8510 | 22.598 | 14.871 | 20.512 | 12.826 | 8.189  |
| 11 | 0.8520 | 13.130 | 10.922 | 16.146 | 15.069 | 20.879 |
| 11 | 0.8530 | 5.561  | 4.951  | 4.366  | 6.078  | 4.791  |
| 11 | 0.8540 | 20.623 | 14.474 | 15.368 | 11.772 | 8.510  |
| 11 | 0.8550 | 14.187 | 16.450 | 15.923 | 14.403 | 14.489 |
| 11 | 0.8560 | 19.285 | 11.477 | 14.424 | 10.605 | 18.125 |
| 11 | 0.8570 | 12.668 | 11.186 | 16.526 | 4.094  | 17.415 |
| 11 | 0.8580 | 21.543 | 13.719 | 20.674 | 10.598 | 20.267 |
| 11 | 0.8590 | 14.899 | 17.715 | 19.722 | 16.938 | 20.754 |
| 11 | 0.8600 | 8.662  | 6.139  | 7.195  | 11.366 | 18.594 |
| 11 | 0.8610 | 15.987 | 5.351  | 10.474 | 11.044 | 19.613 |
| 11 | 0.8620 | 16.736 | 7.042  | 9.535  | 14.192 | 13.618 |
| 11 | 0.8630 | 7.076  | 5.193  | 3.754  | 16.260 | 10.643 |
| 11 | 0.8640 | 8.600  | 6.354  | 9.687  | 10.723 | 11.720 |
| 11 | 0.8650 | 9.646  | 9.795  | 14.756 | 8.700  | 14.188 |
| 11 | 0.8660 | 5.549  | 3.418  | 4.218  | 9.676  | 5.521  |
| 11 | 0.8670 | 3.562  | 2.563  | 5.193  | 10.885 | 2.693  |
| 11 | 0.8680 | 4.739  | 6.381  | 8.007  | 6.244  | 6.358  |
| 11 | 0.8690 | 8.918  | 10.518 | 6.307  | 8.058  | 5.894  |
| 11 | 0.8700 | 7.827  | 7.539  | 4.484  | 17.617 | 9.216  |
| 11 | 0.8710 | 7.790  | 7.538  | 4.472  | 17.628 | 9.098  |
| 11 | 0.8720 | 13.567 | 8.880  | 14.882 | 18.421 | 16.790 |
| 11 | 0.8730 | 5.763  | 6.592  | 7.807  | 8.721  | 9.036  |
| 11 | 0.8740 | 5.389  | 6.258  | 5.017  | 14.368 | 5.954  |
| 11 | 0.8750 | 5.825  | 12.885 | 7.688  | 25.182 | 10.315 |
| 11 | 0.8760 | 5.790  | 12.766 | 7.545  | 25.285 | 10.514 |
| 11 | 0.8770 | 13.463 | 5.122  | 6.889  | 5.487  | 10.759 |
| 11 | 0.8780 | 4.912  | 3.807  | 3.438  | 15.578 | 16.106 |
| 11 | 0.8790 | 21.863 | 17.865 | 25.067 | 17.584 | 8.845  |
| 11 | 0.8800 | 21.693 | 17.799 | 25.053 | 17.454 | 8.889  |
| 11 | 0.8810 | 16.591 | 12.878 | 11.458 | 31.596 | 21.395 |
| 11 | 0.8820 | 5.490  | 9.828  | 7.971  | 22.188 | 11.177 |
| 11 | 0.8830 | 8.049  | 8.118  | 10.024 | 20.556 | 11.095 |
| 11 | 0.8840 | 16.542 | 7.871  | 11.798 | 14.916 | 7.644  |
| 11 | 0.8850 | 11.873 | 7.804  | 10.021 | 12.769 | 7.949  |
| 11 | 0.8860 | 9.786  | 7.072  | 10.537 | 18.431 | 9.188  |
| 11 | 0.8870 | 21.311 | 11.768 | 16.996 | 12.259 | 17.686 |
| 11 | 0.8880 | 12.197 | 13.450 | 10.826 | 8.706  | 14.240 |
| 11 | 0.8890 | 17.510 | 13.647 | 13.217 | 9.450  | 8.738  |
| 11 | 0.8900 | 15.283 | 15.573 | 14.183 | 16.375 | 9.776  |
| 11 | 0.8910 | 13.585 | 13.410 | 13.829 | 16.113 | 12.928 |
| 11 | 0.8920 | 10.883 | 8.200  | 6.074  | 13.714 | 14.514 |
| 11 | 0.8930 | 6.099  | 10.738 | 5.856  | 24.940 | 11.759 |
| 11 | 0.8940 | 6.311  | 13.008 | 3.961  | 22.636 | 18.678 |
| 11 | 0.8950 | 10.422 | 16.278 | 10.508 | 19.433 | 10.147 |

|    |        |        |        |        |        |        |
|----|--------|--------|--------|--------|--------|--------|
| 11 | 0.8960 | 12.636 | 13.551 | 12.441 | 15.778 | 12.610 |
| 11 | 0.8970 | 16.312 | 16.269 | 18.102 | 19.581 | 16.885 |
| 11 | 0.8980 | 17.326 | 21.283 | 18.809 | 17.955 | 19.930 |
| 11 | 0.8990 | 10.672 | 10.699 | 10.356 | 11.683 | 14.605 |
| 11 | 0.9000 | 7.470  | 13.521 | 10.558 | 13.735 | 15.776 |
| 11 | 0.9010 | 11.292 | 14.971 | 13.886 | 14.391 | 10.031 |
| 11 | 0.9020 | 10.549 | 17.451 | 12.482 | 21.743 | 11.031 |
| 11 | 0.9030 | 7.354  | 13.045 | 8.685  | 24.217 | 10.790 |
| 11 | 0.9040 | 9.329  | 12.345 | 12.257 | 22.478 | 13.257 |
| 11 | 0.9050 | 18.426 | 20.371 | 22.266 | 25.950 | 8.629  |
| 11 | 0.9060 | 14.415 | 12.636 | 9.997  | 18.920 | 12.700 |
| 11 | 0.9070 | 8.652  | 11.196 | 11.693 | 14.322 | 15.937 |
| 11 | 0.9080 | 20.633 | 16.586 | 19.510 | 17.871 | 23.699 |
| 11 | 0.9090 | 21.349 | 15.842 | 21.470 | 17.787 | 15.212 |
| 11 | 0.9100 | 6.679  | 7.648  | 9.351  | 15.908 | 6.941  |
| 11 | 0.9110 | 14.499 | 12.308 | 13.210 | 20.563 | 5.384  |
| 11 | 0.9120 | 20.521 | 17.291 | 15.778 | 15.862 | 26.018 |
| 11 | 0.9130 | 15.914 | 15.334 | 13.388 | 28.230 | 22.109 |
| 11 | 0.9140 | 14.545 | 15.125 | 10.764 | 21.559 | 22.529 |
| 11 | 0.9150 | 18.625 | 17.503 | 18.854 | 24.995 | 23.959 |
| 11 | 0.9160 | 17.214 | 10.641 | 10.663 | 20.823 | 10.413 |
| 11 | 0.9170 | 13.606 | 13.349 | 14.772 | 21.019 | 7.949  |
| 11 | 0.9180 | 10.780 | 8.901  | 11.080 | 18.192 | 4.428  |
| 11 | 0.9190 | 13.445 | 14.017 | 14.192 | 18.159 | 23.044 |
| 11 | 0.9200 | 16.193 | 17.872 | 17.106 | 20.975 | 15.467 |
| 11 | 0.9210 | 15.492 | 19.031 | 18.375 | 22.525 | 16.100 |
| 11 | 0.9220 | 10.526 | 13.821 | 13.691 | 23.829 | 18.467 |
| 11 | 0.9230 | 7.322  | 14.639 | 7.113  | 21.659 | 15.767 |
| 11 | 0.9240 | 21.299 | 21.820 | 21.680 | 19.670 | 15.191 |
| 11 | 0.9250 | 7.572  | 9.258  | 4.624  | 8.639  | 9.138  |
| 11 | 0.9260 | 5.356  | 11.497 | 9.195  | 14.578 | 5.368  |
| 11 | 0.9270 | 2.104  | 5.578  | 1.125  | 4.753  | 7.403  |
| 11 | 0.9280 | 3.489  | 5.226  | 2.665  | 7.161  | 7.680  |
| 11 | 0.9290 | 9.658  | 16.242 | 9.424  | 15.082 | 10.577 |
| 11 | 0.9300 | 9.822  | 10.538 | 5.515  | 18.758 | 17.534 |
| 11 | 0.9310 | 11.939 | 11.037 | 13.947 | 23.664 | 15.978 |
| 11 | 0.9320 | 3.441  | 7.335  | 5.125  | 10.954 | 3.607  |
| 11 | 0.9330 | 6.822  | 7.885  | 6.644  | 8.446  | 8.359  |
| 11 | 0.9340 | 4.234  | 4.871  | 5.747  | 10.243 | 9.120  |
| 11 | 0.9350 | 8.999  | 9.290  | 13.165 | 16.814 | 13.988 |
| 11 | 0.9360 | 8.443  | 6.848  | 4.915  | 9.017  | 6.122  |
| 11 | 0.9370 | 14.117 | 11.627 | 8.741  | 24.630 | 7.363  |
| 11 | 0.9380 | 12.988 | 11.057 | 5.550  | 23.162 | 18.729 |
| 11 | 0.9390 | 10.701 | 5.693  | 5.786  | 18.058 | 22.050 |
| 11 | 0.9400 | 14.372 | 7.443  | 7.581  | 6.835  | 10.112 |
| 11 | 0.9410 | 6.700  | 12.548 | 7.888  | 5.954  | 0.879  |
| 11 | 0.9420 | 7.996  | 8.684  | 6.712  | 12.645 | 15.009 |
| 11 | 0.9430 | 14.027 | 15.473 | 10.955 | 14.966 | 11.604 |
| 11 | 0.9440 | 13.124 | 18.724 | 15.739 | 12.321 | 13.327 |
| 11 | 0.9450 | 7.299  | 4.466  | 2.959  | 11.981 | 10.733 |



|    |        |        |        |        |        |        |
|----|--------|--------|--------|--------|--------|--------|
| 11 | 0.9460 | 8.975  | 11.042 | 8.867  | 14.615 | 11.070 |
| 11 | 0.9470 | 12.687 | 13.834 | 11.248 | 18.912 | 18.942 |
| 11 | 0.9480 | 12.507 | 15.616 | 10.471 | 31.491 | 9.361  |
| 11 | 0.9490 | 14.338 | 9.861  | 12.778 | 16.509 | 10.481 |
| 11 | 0.9500 | 13.542 | 17.349 | 11.004 | 15.250 | 16.133 |
| 11 | 0.9510 | 8.097  | 14.968 | 8.820  | 13.641 | 6.003  |
| 11 | 0.9520 | 7.398  | 13.453 | 4.957  | 18.086 | 8.135  |
| 11 | 0.9530 | 16.427 | 20.180 | 14.002 | 22.448 | 6.340  |
| 11 | 0.9540 | 15.582 | 15.309 | 13.623 | 14.799 | 18.445 |
| 11 | 0.9550 | 14.351 | 9.374  | 18.033 | 19.813 | 17.802 |
| 11 | 0.9560 | 26.163 | 20.977 | 27.725 | 17.764 | 28.237 |
| 11 | 0.9570 | 32.168 | 18.715 | 34.589 | 20.285 | 8.495  |
| 11 | 0.9580 | 32.123 | 18.714 | 34.510 | 20.178 | 8.405  |
| 11 | 0.9590 | 23.209 | 15.672 | 21.547 | 26.396 | 29.084 |
| 11 | 0.9600 | 27.791 | 23.355 | 17.320 | 16.165 | 23.903 |
| 11 | 0.9610 | 14.949 | 15.675 | 13.037 | 14.150 | 16.445 |
| 11 | 0.9620 | 13.805 | 15.336 | 16.445 | 14.171 | 18.646 |
| 11 | 0.9630 | 12.792 | 13.733 | 7.638  | 9.811  | 15.089 |
| 11 | 0.9640 | 23.752 | 16.805 | 24.480 | 23.745 | 8.099  |
| 11 | 0.9650 | 3.247  | 12.832 | 6.189  | 20.531 | 9.185  |
| 11 | 0.9660 | 11.040 | 19.322 | 13.007 | 14.981 | 9.208  |
| 11 | 0.9670 | 13.921 | 25.362 | 16.664 | 15.206 | 10.720 |
| 11 | 0.9680 | 10.830 | 14.425 | 9.662  | 16.653 | 19.968 |
| 11 | 0.9690 | 10.839 | 14.418 | 9.602  | 16.673 | 19.703 |
| 11 | 0.9700 | 6.593  | 7.946  | 6.242  | 7.203  | 13.878 |
| 11 | 0.9710 | 9.769  | 13.716 | 11.700 | 22.198 | 25.580 |
| 11 | 0.9720 | 17.167 | 19.797 | 16.768 | 21.416 | 14.402 |
| 11 | 0.9730 | 16.873 | 20.017 | 20.483 | 30.537 | 15.686 |
| 11 | 0.9740 | 4.593  | 9.321  | 4.502  | 17.512 | 22.949 |
| 11 | 0.9750 | 4.436  | 8.096  | 2.738  | 20.009 | 22.968 |
| 11 | 0.9760 | 4.534  | 5.206  | 2.525  | 12.007 | 10.194 |
| 11 | 0.9770 | 3.996  | 9.273  | 5.414  | 16.384 | 21.183 |
| 11 | 0.9780 | 9.601  | 13.459 | 14.842 | 14.787 | 18.499 |
| 11 | 0.9790 | 12.401 | 21.135 | 19.048 | 21.866 | 14.547 |
| 11 | 0.9800 | 16.723 | 19.003 | 19.016 | 33.890 | 19.325 |
| 11 | 0.9810 | 15.541 | 22.439 | 16.658 | 23.510 | 21.251 |
| 11 | 0.9820 | 20.428 | 23.942 | 20.440 | 13.407 | 27.448 |
| 11 | 0.9830 | 27.699 | 29.025 | 23.171 | 17.253 | 23.434 |
| 11 | 0.9840 | 26.722 | 31.650 | 27.387 | 21.102 | 13.608 |
| 11 | 0.9850 | 13.986 | 12.633 | 11.352 | 19.939 | 22.422 |
| 11 | 0.9860 | 13.059 | 9.794  | 9.291  | 15.408 | 7.782  |
| 11 | 0.9870 | 26.429 | 21.195 | 26.982 | 11.351 | 16.914 |
| 11 | 0.9880 | 18.815 | 21.605 | 18.140 | 14.104 | 16.163 |
| 11 | 0.9890 | 20.872 | 30.609 | 27.049 | 16.095 | 10.334 |
| 11 | 0.9900 | 20.586 | 26.772 | 23.951 | 16.031 | 7.975  |
| 11 | 0.9910 | 13.505 | 19.902 | 13.441 | 21.086 | 17.488 |
| 11 | 0.9920 | 11.502 | 15.074 | 13.626 | 13.838 | 14.730 |
| 11 | 0.9930 | 9.348  | 14.390 | 16.913 | 21.804 | 27.701 |
| 11 | 0.9940 | 14.167 | 14.290 | 14.265 | 21.153 | 17.765 |
| 11 | 0.9950 | 16.206 | 22.522 | 13.932 | 16.370 | 25.752 |

|    |        |        |        |        |        |        |
|----|--------|--------|--------|--------|--------|--------|
| 11 | 0.9960 | 15.545 | 21.813 | 19.979 | 17.064 | 17.888 |
| 11 | 0.9970 | 21.305 | 21.560 | 20.820 | 18.927 | 24.804 |
| 11 | 0.9980 | 28.765 | 31.998 | 25.229 | 22.000 | 24.772 |
| 11 | 0.9990 | 10.210 | 14.986 | 15.861 | 16.116 | 36.621 |
| 11 | 1.0000 | 15.301 | 17.169 | 15.694 | 13.692 | 15.332 |
| 11 | 1.0010 | 13.404 | 22.596 | 12.123 | 18.589 | 13.478 |
| 11 | 1.0020 | 13.379 | 15.954 | 9.957  | 11.543 | 20.270 |
| 11 | 1.0030 | 21.353 | 16.268 | 14.980 | 15.009 | 25.023 |
| 11 | 1.0040 | 10.392 | 14.028 | 7.733  | 16.411 | 16.613 |
| 11 | 1.0050 | 9.415  | 16.732 | 9.369  | 15.124 | 12.863 |
| 11 | 1.0060 | 9.523  | 19.564 | 9.689  | 26.250 | 16.565 |
| 11 | 1.0070 | 17.915 | 17.754 | 15.125 | 16.071 | 15.792 |
| 11 | 1.0080 | 8.001  | 12.724 | 12.147 | 9.543  | 9.691  |
| 11 | 1.0090 | 19.718 | 16.719 | 18.221 | 21.811 | 8.694  |
| 11 | 1.0100 | 11.149 | 12.281 | 10.053 | 12.863 | 8.435  |
| 11 | 1.0110 | 6.500  | 13.723 | 8.032  | 16.792 | 11.838 |
| 11 | 1.0120 | 5.323  | 9.283  | 7.232  | 10.408 | 13.643 |
| 11 | 1.0130 | 7.404  | 12.014 | 10.200 | 22.879 | 12.366 |
| 11 | 1.0140 | 10.527 | 14.343 | 13.326 | 18.586 | 8.969  |
| 11 | 1.0150 | 9.102  | 12.930 | 13.500 | 17.931 | 14.502 |
| 11 | 1.0160 | 10.044 | 13.053 | 17.249 | 12.418 | 16.649 |
| 11 | 1.0170 | 11.993 | 9.249  | 8.434  | 16.738 | 22.773 |
| 11 | 1.0180 | 23.382 | 18.132 | 19.626 | 19.811 | 19.204 |
| 11 | 1.0190 | 14.131 | 11.601 | 12.164 | 20.098 | 22.629 |
| 11 | 1.0200 | 14.410 | 13.778 | 16.922 | 13.331 | 16.456 |
| 11 | 1.0210 | 15.947 | 19.885 | 21.427 | 12.671 | 12.979 |
| 11 | 1.0220 | 12.987 | 13.313 | 12.342 | 17.076 | 18.109 |
| 11 | 1.0230 | 12.933 | 13.223 | 12.315 | 16.996 | 18.171 |
| 11 | 1.0240 | 12.880 | 13.134 | 12.293 | 16.913 | 18.229 |
| 11 | 1.0250 | 3.907  | 12.472 | 5.491  | 22.576 | 20.455 |
| 11 | 1.0260 | 13.561 | 18.878 | 9.059  | 21.648 | 14.834 |
| 11 | 1.0270 | 16.438 | 25.365 | 14.976 | 20.943 | 13.772 |
| 11 | 1.0280 | 10.154 | 12.382 | 7.094  | 15.801 | 19.490 |
| 11 | 1.0290 | 13.392 | 22.433 | 13.598 | 15.677 | 16.726 |
| 11 | 1.0300 | 21.633 | 24.185 | 19.220 | 15.695 | 21.940 |
| 11 | 1.0310 | 18.465 | 14.344 | 17.351 | 16.901 | 11.349 |
| 11 | 1.0320 | 12.490 | 13.171 | 7.128  | 12.859 | 5.618  |
| 11 | 1.0330 | 12.388 | 14.656 | 9.453  | 17.862 | 7.488  |
| 11 | 1.0340 | 10.586 | 15.168 | 11.688 | 13.911 | 13.333 |
| 11 | 1.0350 | 12.333 | 10.139 | 17.194 | 10.343 | 18.444 |
| 11 | 1.0360 | 11.585 | 12.675 | 13.028 | 18.510 | 18.909 |
| 11 | 1.0370 | 16.769 | 11.779 | 14.585 | 9.984  | 13.824 |
| 11 | 1.0380 | 16.796 | 11.524 | 14.608 | 10.007 | 13.955 |
| 11 | 1.0390 | 8.914  | 8.826  | 6.794  | 16.740 | 18.368 |
| 11 | 1.0400 | 21.268 | 19.822 | 17.481 | 16.969 | 14.005 |
| 11 | 1.0410 | 18.112 | 23.152 | 21.425 | 19.462 | 16.559 |
| 11 | 1.0420 | 18.480 | 24.938 | 18.649 | 12.128 | 11.340 |
| 11 | 1.0430 | 19.539 | 26.797 | 16.473 | 8.023  | 14.203 |
| 11 | 1.0440 | 8.535  | 10.319 | 6.404  | 24.992 | 14.396 |
| 11 | 1.0450 | 8.124  | 4.872  | 5.138  | 16.320 | 13.039 |

|    |        |        |        |        |        |        |
|----|--------|--------|--------|--------|--------|--------|
| 11 | 1.0460 | 8.761  | 10.657 | 12.497 | 21.997 | 10.425 |
| 11 | 1.0470 | 8.683  | 8.705  | 7.328  | 9.662  | 8.129  |
| 11 | 1.0480 | 8.047  | 9.188  | 7.391  | 10.694 | 8.383  |
| 11 | 1.0490 | 3.923  | 10.395 | 6.262  | 13.853 | 13.204 |
| 11 | 1.0500 | 12.723 | 22.472 | 18.278 | 19.473 | 16.576 |
| 11 | 1.0510 | 17.175 | 16.486 | 11.100 | 12.397 | 15.291 |
| 11 | 1.0520 | 23.898 | 21.781 | 20.776 | 12.658 | 25.186 |
| 11 | 1.0530 | 0.000  | 0.000  | 0.000  | 0.000  | 0.000  |
| 12 | 0.0001 | 0.000  | 0.000  | 0.000  | 0.000  | 0.000  |
| 12 | 0.0011 | 11.601 | 11.778 | 10.832 | 23.181 | 25.505 |
| 12 | 0.0021 | 9.025  | 7.242  | 6.798  | 20.293 | 16.772 |
| 12 | 0.0031 | 9.824  | 13.628 | 13.667 | 26.090 | 13.966 |
| 12 | 0.0041 | 8.790  | 5.811  | 11.721 | 20.734 | 23.538 |
| 12 | 0.0051 | 10.563 | 7.376  | 7.450  | 9.383  | 10.884 |
| 12 | 0.0061 | 20.918 | 14.813 | 19.079 | 14.997 | 16.117 |
| 12 | 0.0071 | 21.433 | 8.633  | 16.053 | 14.674 | 7.882  |
| 12 | 0.0081 | 14.481 | 8.331  | 12.874 | 17.483 | 11.200 |
| 12 | 0.0091 | 19.307 | 17.911 | 14.710 | 20.338 | 14.118 |
| 12 | 0.0101 | 21.579 | 16.103 | 15.279 | 18.083 | 9.718  |
| 12 | 0.0111 | 11.501 | 12.297 | 10.925 | 13.843 | 3.110  |
| 12 | 0.0121 | 3.600  | 2.326  | 3.281  | 4.375  | 2.039  |
| 12 | 0.0131 | 10.538 | 6.340  | 10.013 | 18.082 | 10.747 |
| 12 | 0.0141 | 21.947 | 10.502 | 16.418 | 20.397 | 16.336 |
| 12 | 0.0151 | 19.714 | 19.950 | 9.223  | 20.884 | 18.844 |
| 12 | 0.0161 | 19.840 | 24.584 | 15.836 | 26.871 | 18.211 |
| 12 | 0.0171 | 13.244 | 15.651 | 9.366  | 27.183 | 12.827 |
| 12 | 0.0181 | 15.782 | 20.869 | 13.426 | 35.785 | 17.662 |
| 12 | 0.0191 | 13.333 | 14.525 | 12.410 | 23.502 | 20.860 |
| 12 | 0.0201 | 17.909 | 17.335 | 14.460 | 25.231 | 15.123 |
| 12 | 0.0211 | 19.555 | 17.691 | 10.702 | 20.529 | 16.488 |
| 12 | 0.0221 | 15.808 | 17.882 | 11.340 | 19.019 | 15.278 |
| 12 | 0.0231 | 9.856  | 20.448 | 9.710  | 25.813 | 15.467 |
| 12 | 0.0241 | 14.572 | 17.282 | 13.164 | 12.564 | 18.373 |
| 12 | 0.0251 | 15.416 | 14.957 | 13.882 | 17.395 | 8.250  |
| 12 | 0.0261 | 4.852  | 8.547  | 9.411  | 15.645 | 5.510  |
| 12 | 0.0271 | 9.267  | 15.236 | 13.201 | 9.336  | 4.344  |
| 12 | 0.0281 | 13.601 | 15.867 | 12.961 | 15.977 | 14.954 |
| 12 | 0.0291 | 9.416  | 21.651 | 12.421 | 26.667 | 15.223 |
| 12 | 0.0301 | 7.910  | 10.042 | 13.492 | 16.962 | 16.064 |
| 12 | 0.0311 | 6.216  | 5.115  | 8.144  | 13.078 | 11.590 |
| 12 | 0.0321 | 18.574 | 15.914 | 17.978 | 15.728 | 24.506 |
| 12 | 0.0331 | 10.064 | 14.127 | 14.337 | 22.458 | 8.641  |
| 12 | 0.0341 | 11.953 | 7.467  | 10.773 | 14.241 | 15.336 |
| 12 | 0.0351 | 12.376 | 11.197 | 10.434 | 20.054 | 10.228 |
| 12 | 0.0361 | 12.873 | 10.822 | 12.141 | 11.411 | 18.183 |
| 12 | 0.0371 | 27.417 | 16.194 | 14.327 | 27.395 | 18.203 |
| 12 | 0.0381 | 19.965 | 12.583 | 15.201 | 21.410 | 18.223 |
| 12 | 0.0391 | 9.545  | 7.237  | 6.986  | 13.858 | 15.147 |
| 12 | 0.0401 | 10.965 | 10.753 | 6.513  | 22.370 | 9.542  |
| 12 | 0.0411 | 8.563  | 16.784 | 10.710 | 28.509 | 9.084  |

|    |        |        |        |        |        |        |
|----|--------|--------|--------|--------|--------|--------|
| 12 | 0.0421 | 31.210 | 24.987 | 25.665 | 13.775 | 17.023 |
| 12 | 0.0431 | 10.342 | 13.398 | 9.966  | 23.045 | 15.771 |
| 12 | 0.0441 | 14.639 | 29.331 | 16.779 | 23.049 | 15.596 |
| 12 | 0.0451 | 16.360 | 18.333 | 14.727 | 21.614 | 16.432 |
| 12 | 0.0461 | 21.459 | 18.320 | 15.723 | 13.464 | 11.537 |
| 12 | 0.0471 | 19.843 | 10.416 | 15.043 | 12.533 | 17.406 |
| 12 | 0.0481 | 12.669 | 10.290 | 10.426 | 21.086 | 17.118 |
| 12 | 0.0491 | 18.003 | 22.250 | 13.419 | 19.829 | 15.038 |
| 12 | 0.0501 | 13.187 | 17.349 | 11.503 | 16.680 | 13.397 |
| 12 | 0.0511 | 7.012  | 8.022  | 4.817  | 9.109  | 13.157 |
| 12 | 0.0521 | 13.661 | 10.993 | 9.033  | 22.735 | 11.027 |
| 12 | 0.0531 | 11.708 | 14.074 | 10.336 | 17.786 | 14.074 |
| 12 | 0.0541 | 15.396 | 8.699  | 13.762 | 14.003 | 13.854 |
| 12 | 0.0551 | 12.555 | 11.037 | 14.540 | 12.975 | 17.637 |
| 12 | 0.0561 | 10.271 | 12.475 | 13.240 | 14.524 | 12.505 |
| 12 | 0.0571 | 10.215 | 12.443 | 13.178 | 14.492 | 12.555 |
| 12 | 0.0581 | 10.166 | 12.417 | 13.116 | 14.460 | 12.604 |
| 12 | 0.0591 | 8.175  | 8.410  | 8.184  | 10.882 | 10.946 |
| 12 | 0.0601 | 12.670 | 15.098 | 10.794 | 19.250 | 14.134 |
| 12 | 0.0611 | 13.818 | 19.679 | 13.970 | 19.418 | 12.924 |
| 12 | 0.0621 | 13.896 | 19.797 | 14.085 | 19.468 | 12.881 |
| 12 | 0.0631 | 15.512 | 17.287 | 21.556 | 35.235 | 12.598 |
| 12 | 0.0641 | 18.372 | 18.058 | 24.752 | 29.610 | 13.037 |
| 12 | 0.0651 | 13.360 | 10.927 | 7.918  | 21.852 | 13.563 |
| 12 | 0.0661 | 9.964  | 10.585 | 10.238 | 24.153 | 19.694 |
| 12 | 0.0671 | 11.152 | 14.618 | 10.322 | 27.713 | 15.483 |
| 12 | 0.0681 | 20.835 | 17.287 | 16.309 | 26.502 | 22.255 |
| 12 | 0.0691 | 8.272  | 14.674 | 8.274  | 23.099 | 22.617 |
| 12 | 0.0701 | 13.602 | 11.099 | 14.974 | 21.117 | 29.687 |
| 12 | 0.0711 | 6.066  | 8.139  | 13.247 | 15.913 | 22.124 |
| 12 | 0.0721 | 14.543 | 17.233 | 19.659 | 22.528 | 27.200 |
| 12 | 0.0731 | 21.086 | 21.768 | 24.753 | 17.953 | 19.495 |
| 12 | 0.0741 | 12.554 | 13.259 | 14.337 | 20.982 | 13.301 |
| 12 | 0.0751 | 9.586  | 9.127  | 8.159  | 24.683 | 7.926  |
| 12 | 0.0761 | 15.776 | 16.177 | 9.914  | 8.947  | 15.270 |
| 12 | 0.0771 | 13.718 | 8.534  | 10.261 | 29.742 | 14.970 |
| 12 | 0.0781 | 13.558 | 7.671  | 19.195 | 16.267 | 17.087 |
| 12 | 0.0791 | 18.094 | 14.839 | 29.925 | 14.317 | 18.940 |
| 12 | 0.0801 | 13.472 | 8.346  | 11.804 | 21.631 | 13.667 |
| 12 | 0.0811 | 8.044  | 7.009  | 8.449  | 23.207 | 14.331 |
| 12 | 0.0821 | 16.315 | 18.134 | 18.248 | 25.534 | 5.302  |
| 12 | 0.0831 | 19.837 | 17.270 | 17.542 | 24.112 | 23.170 |
| 12 | 0.0841 | 19.003 | 23.274 | 18.797 | 23.256 | 18.007 |
| 12 | 0.0851 | 17.175 | 29.987 | 22.705 | 22.585 | 19.208 |
| 12 | 0.0861 | 25.482 | 31.192 | 24.226 | 24.252 | 7.760  |
| 12 | 0.0871 | 20.673 | 24.308 | 20.645 | 39.979 | 21.145 |
| 12 | 0.0881 | 11.219 | 12.227 | 13.192 | 34.509 | 12.299 |
| 12 | 0.0891 | 14.036 | 14.567 | 16.388 | 31.666 | 17.723 |
| 12 | 0.0901 | 4.602  | 8.137  | 5.217  | 15.903 | 6.946  |
| 12 | 0.0911 | 12.553 | 19.061 | 15.164 | 22.229 | 13.483 |

|    |        |        |        |        |        |        |
|----|--------|--------|--------|--------|--------|--------|
| 12 | 0.0921 | 21.180 | 27.114 | 26.767 | 22.382 | 15.042 |
| 12 | 0.0931 | 21.561 | 20.345 | 20.996 | 26.791 | 7.643  |
| 12 | 0.0941 | 17.696 | 26.479 | 22.606 | 22.586 | 24.222 |
| 12 | 0.0951 | 18.575 | 18.481 | 19.446 | 8.253  | 16.583 |
| 12 | 0.0961 | 15.334 | 19.442 | 16.516 | 19.683 | 16.909 |
| 12 | 0.0971 | 7.470  | 18.555 | 10.438 | 29.938 | 9.704  |
| 12 | 0.0981 | 7.139  | 13.203 | 5.948  | 16.281 | 6.309  |
| 12 | 0.0991 | 25.780 | 16.412 | 16.814 | 24.187 | 18.391 |
| 12 | 0.1001 | 11.410 | 15.803 | 12.139 | 31.844 | 10.947 |
| 12 | 0.1011 | 10.386 | 13.143 | 12.289 | 27.686 | 22.001 |
| 12 | 0.1021 | 10.316 | 10.559 | 15.986 | 16.539 | 16.541 |
| 12 | 0.1031 | 20.332 | 10.682 | 17.576 | 25.181 | 12.142 |
| 12 | 0.1041 | 17.487 | 16.226 | 13.745 | 11.056 | 10.817 |
| 12 | 0.1051 | 22.681 | 11.667 | 27.452 | 23.953 | 17.806 |
| 12 | 0.1061 | 9.709  | 13.565 | 14.055 | 31.179 | 14.190 |
| 12 | 0.1071 | 12.293 | 21.258 | 18.782 | 12.782 | 16.176 |
| 12 | 0.1081 | 18.106 | 24.064 | 20.081 | 20.972 | 20.024 |
| 12 | 0.1091 | 10.343 | 16.515 | 10.495 | 29.127 | 15.820 |
| 12 | 0.1101 | 10.147 | 15.946 | 8.423  | 30.310 | 18.380 |
| 12 | 0.1111 | 17.409 | 17.292 | 13.622 | 30.290 | 13.066 |
| 12 | 0.1121 | 16.239 | 13.937 | 13.226 | 30.773 | 21.650 |
| 12 | 0.1131 | 13.532 | 18.356 | 11.754 | 29.018 | 16.852 |
| 12 | 0.1141 | 16.690 | 12.363 | 14.813 | 20.127 | 21.693 |
| 12 | 0.1151 | 14.811 | 8.998  | 9.833  | 22.496 | 21.304 |
| 12 | 0.1161 | 9.620  | 13.113 | 12.610 | 9.255  | 16.026 |
| 12 | 0.1171 | 21.736 | 24.336 | 25.086 | 17.875 | 11.688 |
| 12 | 0.1181 | 14.245 | 21.639 | 12.075 | 16.683 | 19.638 |
| 12 | 0.1191 | 15.368 | 22.458 | 14.890 | 19.352 | 19.265 |
| 12 | 0.1201 | 21.624 | 27.158 | 22.355 | 21.580 | 14.729 |
| 12 | 0.1211 | 17.055 | 25.812 | 18.767 | 32.012 | 8.500  |
| 12 | 0.1221 | 19.458 | 15.350 | 19.149 | 26.228 | 15.238 |
| 12 | 0.1231 | 14.075 | 18.570 | 16.769 | 21.714 | 9.376  |
| 12 | 0.1241 | 12.977 | 21.895 | 15.931 | 22.306 | 10.285 |
| 12 | 0.1251 | 12.553 | 17.882 | 12.211 | 20.067 | 8.390  |
| 12 | 0.1261 | 16.929 | 10.410 | 13.487 | 25.180 | 10.791 |
| 12 | 0.1271 | 16.563 | 16.029 | 13.328 | 28.978 | 22.082 |
| 12 | 0.1281 | 12.434 | 14.318 | 10.977 | 20.671 | 15.447 |
| 12 | 0.1291 | 17.895 | 20.923 | 16.887 | 16.078 | 10.211 |
| 12 | 0.1301 | 30.535 | 26.042 | 20.129 | 22.417 | 15.224 |
| 12 | 0.1311 | 16.194 | 22.287 | 18.076 | 20.248 | 11.125 |
| 12 | 0.1321 | 28.310 | 33.955 | 32.919 | 22.328 | 16.744 |
| 12 | 0.1331 | 33.133 | 26.367 | 28.542 | 22.218 | 11.258 |
| 12 | 0.1341 | 40.616 | 44.679 | 41.871 | 24.929 | 17.169 |
| 12 | 0.1351 | 26.335 | 26.088 | 23.951 | 26.679 | 18.874 |
| 12 | 0.1361 | 25.425 | 16.255 | 21.041 | 22.780 | 17.152 |
| 12 | 0.1371 | 19.146 | 16.317 | 16.836 | 16.803 | 10.691 |
| 12 | 0.1381 | 11.624 | 9.030  | 5.728  | 18.871 | 13.692 |
| 12 | 0.1391 | 20.466 | 28.570 | 19.294 | 12.628 | 4.372  |
| 12 | 0.1401 | 23.908 | 33.870 | 22.947 | 8.699  | 13.741 |
| 12 | 0.1411 | 27.344 | 41.633 | 32.816 | 10.352 | 15.897 |

|    |        |        |        |        |        |        |
|----|--------|--------|--------|--------|--------|--------|
| 12 | 0.1421 | 26.500 | 30.948 | 27.565 | 28.814 | 15.846 |
| 12 | 0.1431 | 26.861 | 29.610 | 25.570 | 26.675 | 22.049 |
| 12 | 0.1441 | 20.829 | 21.281 | 17.381 | 21.476 | 36.453 |
| 12 | 0.1451 | 17.923 | 11.048 | 13.046 | 17.025 | 21.922 |
| 12 | 0.1461 | 11.391 | 17.149 | 13.919 | 19.603 | 16.935 |
| 12 | 0.1471 | 23.569 | 24.549 | 22.744 | 15.214 | 21.446 |
| 12 | 0.1481 | 23.951 | 26.602 | 19.793 | 21.628 | 18.060 |
| 12 | 0.1491 | 28.624 | 34.410 | 32.922 | 27.445 | 13.972 |
| 12 | 0.1501 | 37.502 | 48.984 | 33.023 | 23.544 | 29.971 |
| 12 | 0.1511 | 36.257 | 32.555 | 28.009 | 16.573 | 26.011 |
| 12 | 0.1521 | 18.685 | 13.981 | 9.794  | 20.574 | 10.223 |
| 12 | 0.1531 | 20.841 | 19.522 | 21.407 | 17.903 | 7.932  |
| 12 | 0.1541 | 34.977 | 28.824 | 24.244 | 29.238 | 16.242 |
| 12 | 0.1551 | 9.639  | 21.269 | 10.260 | 24.667 | 14.584 |
| 12 | 0.1561 | 17.643 | 23.358 | 15.569 | 16.661 | 9.598  |
| 12 | 0.1571 | 20.105 | 15.899 | 20.433 | 22.119 | 16.897 |
| 12 | 0.1581 | 15.063 | 18.746 | 18.989 | 24.556 | 9.783  |
| 12 | 0.1591 | 14.240 | 23.343 | 17.927 | 16.702 | 11.489 |
| 12 | 0.1601 | 12.692 | 15.368 | 12.681 | 10.950 | 5.474  |
| 12 | 0.1611 | 14.871 | 22.122 | 18.583 | 14.428 | 11.983 |
| 12 | 0.1621 | 22.579 | 29.394 | 25.223 | 19.604 | 16.446 |
| 12 | 0.1631 | 18.435 | 24.833 | 21.574 | 20.489 | 14.046 |
| 12 | 0.1641 | 18.664 | 21.892 | 19.319 | 15.738 | 11.463 |
| 12 | 0.1651 | 26.377 | 33.257 | 27.393 | 19.109 | 21.614 |
| 12 | 0.1661 | 21.941 | 20.121 | 21.955 | 18.986 | 15.218 |
| 12 | 0.1671 | 22.544 | 18.927 | 20.894 | 18.956 | 16.078 |
| 12 | 0.1681 | 18.621 | 20.090 | 18.309 | 6.232  | 17.108 |
| 12 | 0.1691 | 19.055 | 18.829 | 21.566 | 9.798  | 7.587  |
| 12 | 0.1701 | 17.218 | 31.568 | 20.012 | 20.215 | 13.308 |
| 12 | 0.1711 | 29.405 | 34.816 | 35.601 | 18.447 | 22.127 |
| 12 | 0.1721 | 16.965 | 18.399 | 19.631 | 12.750 | 13.500 |
| 12 | 0.1731 | 16.726 | 15.795 | 16.188 | 17.428 | 12.011 |
| 12 | 0.1741 | 11.985 | 12.711 | 9.973  | 15.089 | 17.438 |
| 12 | 0.1751 | 13.079 | 19.304 | 14.212 | 16.807 | 16.498 |
| 12 | 0.1761 | 14.964 | 24.631 | 18.718 | 13.034 | 12.730 |
| 12 | 0.1771 | 12.891 | 21.338 | 18.974 | 13.032 | 13.090 |
| 12 | 0.1781 | 13.513 | 17.560 | 20.519 | 8.450  | 5.200  |
| 12 | 0.1791 | 7.980  | 13.795 | 10.433 | 14.969 | 7.350  |
| 12 | 0.1801 | 7.420  | 10.596 | 8.057  | 12.545 | 6.313  |
| 12 | 0.1811 | 13.577 | 15.742 | 12.183 | 17.962 | 15.843 |
| 12 | 0.1821 | 6.870  | 15.783 | 12.097 | 12.851 | 3.348  |
| 12 | 0.1831 | 9.788  | 16.937 | 15.608 | 9.594  | 5.205  |
| 12 | 0.1841 | 10.313 | 17.113 | 13.832 | 14.667 | 14.003 |
| 12 | 0.1851 | 15.073 | 24.016 | 18.780 | 17.692 | 14.439 |
| 12 | 0.1861 | 22.539 | 22.653 | 16.041 | 10.029 | 12.823 |
| 12 | 0.1871 | 11.976 | 13.558 | 9.856  | 22.025 | 18.164 |
| 12 | 0.1881 | 11.109 | 14.058 | 10.021 | 22.034 | 18.777 |
| 12 | 0.1891 | 30.253 | 43.879 | 29.760 | 23.571 | 21.936 |
| 12 | 0.1901 | 10.537 | 12.346 | 13.973 | 9.174  | 7.864  |
| 12 | 0.1911 | 15.905 | 16.163 | 16.491 | 10.785 | 8.823  |

|    |        |        |        |        |        |        |
|----|--------|--------|--------|--------|--------|--------|
| 12 | 0.1921 | 27.036 | 31.641 | 30.692 | 18.294 | 18.879 |
| 12 | 0.1931 | 22.808 | 20.510 | 24.831 | 16.646 | 22.868 |
| 12 | 0.1941 | 14.000 | 29.188 | 16.427 | 24.140 | 14.812 |
| 12 | 0.1951 | 12.056 | 19.878 | 13.651 | 24.148 | 12.645 |
| 12 | 0.1961 | 9.572  | 8.513  | 7.807  | 7.980  | 11.056 |
| 12 | 0.1971 | 5.408  | 17.989 | 5.989  | 16.002 | 9.528  |
| 12 | 0.1981 | 20.288 | 17.555 | 16.428 | 17.627 | 18.576 |
| 12 | 0.1991 | 9.186  | 16.790 | 12.256 | 34.159 | 19.121 |
| 12 | 0.2001 | 11.796 | 19.638 | 15.679 | 31.689 | 17.699 |
| 12 | 0.2011 | 13.851 | 16.276 | 11.957 | 37.091 | 11.684 |
| 12 | 0.2021 | 13.754 | 18.306 | 14.777 | 34.468 | 7.306  |
| 12 | 0.2031 | 7.988  | 6.175  | 7.122  | 13.709 | 14.560 |
| 12 | 0.2041 | 8.656  | 6.710  | 9.279  | 12.505 | 18.823 |
| 12 | 0.2051 | 10.936 | 14.093 | 14.705 | 7.693  | 10.022 |
| 12 | 0.2061 | 9.375  | 18.765 | 14.249 | 14.284 | 11.464 |
| 12 | 0.2071 | 6.993  | 17.159 | 14.326 | 20.261 | 17.512 |
| 12 | 0.2081 | 16.494 | 19.421 | 15.984 | 19.302 | 31.352 |
| 12 | 0.2091 | 9.332  | 15.005 | 10.012 | 33.662 | 21.283 |
| 12 | 0.2101 | 17.453 | 15.544 | 15.730 | 15.093 | 7.401  |
| 12 | 0.2111 | 16.583 | 18.611 | 18.683 | 8.158  | 12.335 |
| 12 | 0.2121 | 12.029 | 17.388 | 11.156 | 17.919 | 11.516 |
| 12 | 0.2131 | 9.019  | 14.618 | 11.049 | 20.021 | 11.777 |
| 12 | 0.2141 | 10.484 | 17.124 | 8.366  | 9.734  | 12.392 |
| 12 | 0.2151 | 9.958  | 15.943 | 7.463  | 13.095 | 15.351 |
| 12 | 0.2161 | 14.675 | 15.052 | 11.225 | 18.822 | 22.748 |
| 12 | 0.2171 | 25.588 | 19.837 | 22.004 | 17.110 | 20.584 |
| 12 | 0.2181 | 9.480  | 15.365 | 10.774 | 22.061 | 22.186 |
| 12 | 0.2191 | 12.946 | 17.070 | 15.001 | 16.606 | 18.838 |
| 12 | 0.2201 | 11.243 | 17.194 | 12.994 | 17.746 | 19.767 |
| 12 | 0.2211 | 13.029 | 9.990  | 10.602 | 9.754  | 12.864 |
| 12 | 0.2221 | 16.441 | 12.894 | 11.368 | 16.231 | 21.706 |
| 12 | 0.2231 | 7.400  | 6.999  | 6.107  | 12.179 | 18.312 |
| 12 | 0.2241 | 9.334  | 9.567  | 9.322  | 6.057  | 14.553 |
| 12 | 0.2251 | 12.365 | 12.845 | 11.573 | 12.308 | 12.302 |
| 12 | 0.2261 | 8.299  | 15.658 | 8.800  | 12.632 | 11.082 |
| 12 | 0.2271 | 16.502 | 19.025 | 13.260 | 18.733 | 15.201 |
| 12 | 0.2281 | 13.397 | 23.898 | 15.174 | 29.546 | 18.452 |
| 12 | 0.2291 | 6.438  | 14.645 | 9.695  | 27.615 | 19.140 |
| 12 | 0.2301 | 6.644  | 9.271  | 6.912  | 13.957 | 14.410 |
| 12 | 0.2311 | 12.416 | 15.186 | 13.161 | 18.926 | 9.352  |
| 12 | 0.2321 | 12.068 | 16.280 | 13.201 | 12.894 | 8.445  |
| 12 | 0.2331 | 13.449 | 20.265 | 14.865 | 18.359 | 17.019 |
| 12 | 0.2341 | 10.140 | 18.370 | 11.949 | 15.270 | 20.974 |
| 12 | 0.2351 | 5.990  | 10.393 | 6.095  | 11.902 | 17.998 |
| 12 | 0.2361 | 3.522  | 7.014  | 5.442  | 6.322  | 7.287  |
| 12 | 0.2371 | 1.895  | 4.848  | 1.016  | 7.038  | 2.581  |
| 12 | 0.2381 | 5.976  | 10.287 | 5.937  | 12.818 | 17.145 |
| 12 | 0.2391 | 3.083  | 6.037  | 2.267  | 4.898  | 1.589  |
| 12 | 0.2401 | 3.500  | 9.617  | 3.058  | 6.871  | 2.379  |
| 12 | 0.2411 | 2.345  | 8.698  | 3.352  | 10.382 | 2.472  |

|    |        |        |        |        |        |        |
|----|--------|--------|--------|--------|--------|--------|
| 12 | 0.2421 | 13.266 | 11.403 | 13.253 | 10.157 | 7.485  |
| 12 | 0.2431 | 6.623  | 7.414  | 8.561  | 9.090  | 12.550 |
| 12 | 0.2441 | 22.709 | 34.290 | 19.367 | 13.517 | 20.579 |
| 12 | 0.2451 | 12.090 | 8.534  | 9.224  | 13.875 | 11.831 |
| 12 | 0.2461 | 20.734 | 26.934 | 21.004 | 23.748 | 9.435  |
| 12 | 0.2471 | 14.793 | 19.336 | 21.348 | 15.776 | 9.955  |
| 12 | 0.2481 | 18.429 | 17.686 | 20.768 | 14.182 | 16.714 |
| 12 | 0.2491 | 7.327  | 9.854  | 5.737  | 14.934 | 13.121 |
| 12 | 0.2501 | 14.403 | 12.466 | 18.100 | 11.920 | 27.095 |
| 12 | 0.2511 | 14.464 | 20.911 | 20.832 | 22.206 | 10.497 |
| 12 | 0.2521 | 9.885  | 17.144 | 15.319 | 15.607 | 12.243 |
| 12 | 0.2531 | 16.068 | 10.810 | 13.520 | 7.141  | 12.858 |
| 12 | 0.2541 | 2.944  | 5.320  | 2.891  | 1.662  | 3.083  |
| 12 | 0.2551 | 7.602  | 7.669  | 8.877  | 2.938  | 8.430  |
| 12 | 0.2561 | 15.948 | 16.532 | 17.126 | 12.364 | 7.538  |
| 12 | 0.2571 | 12.914 | 8.436  | 15.016 | 13.142 | 11.956 |
| 12 | 0.2581 | 23.164 | 17.883 | 18.498 | 9.896  | 10.086 |
| 12 | 0.2591 | 14.350 | 8.162  | 7.354  | 10.730 | 10.179 |
| 12 | 0.2601 | 12.062 | 17.453 | 13.915 | 14.176 | 14.863 |
| 12 | 0.2611 | 10.921 | 11.828 | 12.665 | 16.135 | 25.826 |
| 12 | 0.2621 | 12.769 | 15.242 | 14.289 | 7.705  | 9.337  |
| 12 | 0.2631 | 8.532  | 8.961  | 9.233  | 12.496 | 9.350  |
| 12 | 0.2641 | 9.171  | 10.028 | 8.678  | 11.868 | 15.460 |
| 12 | 0.2651 | 5.457  | 7.463  | 3.080  | 16.068 | 10.510 |
| 12 | 0.2661 | 14.459 | 19.402 | 12.888 | 11.396 | 7.886  |
| 12 | 0.2671 | 13.435 | 13.931 | 16.263 | 11.102 | 9.475  |
| 12 | 0.2681 | 9.808  | 16.017 | 13.204 | 17.942 | 18.040 |
| 12 | 0.2691 | 12.357 | 16.655 | 12.154 | 22.062 | 15.564 |
| 12 | 0.2701 | 12.911 | 20.266 | 11.210 | 23.832 | 19.560 |
| 12 | 0.2711 | 14.745 | 7.608  | 11.257 | 12.903 | 16.995 |
| 12 | 0.2721 | 13.818 | 6.500  | 9.904  | 13.028 | 16.730 |
| 12 | 0.2731 | 20.883 | 16.185 | 15.136 | 10.342 | 14.389 |
| 12 | 0.2741 | 9.812  | 12.310 | 9.169  | 10.169 | 10.277 |
| 12 | 0.2751 | 12.925 | 7.800  | 12.367 | 14.765 | 10.183 |
| 12 | 0.2761 | 14.902 | 25.309 | 20.454 | 26.722 | 16.079 |
| 12 | 0.2771 | 28.847 | 17.152 | 21.440 | 22.559 | 7.802  |
| 12 | 0.2781 | 17.234 | 16.156 | 12.614 | 16.439 | 15.966 |
| 12 | 0.2791 | 11.955 | 14.047 | 13.100 | 15.556 | 15.589 |
| 12 | 0.2801 | 8.808  | 5.889  | 6.580  | 14.085 | 8.211  |
| 12 | 0.2811 | 36.027 | 15.083 | 20.848 | 6.992  | 9.281  |
| 12 | 0.2821 | 5.725  | 9.211  | 10.271 | 6.035  | 15.147 |
| 12 | 0.2831 | 6.590  | 5.986  | 6.956  | 11.298 | 6.897  |
| 12 | 0.2841 | 6.655  | 5.962  | 6.850  | 11.310 | 6.874  |
| 12 | 0.2851 | 17.225 | 9.423  | 12.645 | 14.859 | 11.913 |
| 12 | 0.2861 | 23.268 | 14.517 | 14.450 | 20.538 | 9.744  |
| 12 | 0.2871 | 19.119 | 10.699 | 12.576 | 19.731 | 12.493 |
| 12 | 0.2881 | 23.276 | 14.673 | 16.451 | 15.767 | 15.412 |
| 12 | 0.2891 | 21.258 | 11.321 | 11.411 | 14.090 | 16.896 |
| 12 | 0.2901 | 4.823  | 1.854  | 4.479  | 12.426 | 12.577 |
| 12 | 0.2911 | 15.701 | 15.369 | 16.538 | 16.364 | 23.637 |



|    |        |        |        |        |        |        |
|----|--------|--------|--------|--------|--------|--------|
| 12 | 0.2921 | 12.142 | 12.544 | 7.249  | 23.973 | 15.771 |
| 12 | 0.2931 | 12.038 | 13.539 | 11.472 | 20.658 | 17.328 |
| 12 | 0.2941 | 27.737 | 20.147 | 12.828 | 16.267 | 20.687 |
| 12 | 0.2951 | 10.865 | 5.982  | 10.182 | 4.767  | 12.083 |
| 12 | 0.2961 | 10.460 | 9.830  | 11.235 | 5.605  | 7.878  |
| 12 | 0.2971 | 11.650 | 11.681 | 11.855 | 19.002 | 12.564 |
| 12 | 0.2981 | 9.434  | 9.492  | 6.147  | 17.053 | 21.311 |
| 12 | 0.2991 | 6.686  | 16.903 | 8.172  | 26.284 | 16.531 |
| 12 | 0.3001 | 17.542 | 14.462 | 11.183 | 13.088 | 12.703 |
| 12 | 0.3011 | 18.673 | 11.063 | 12.427 | 14.731 | 19.622 |
| 12 | 0.3021 | 17.677 | 21.878 | 14.950 | 14.832 | 7.260  |
| 12 | 0.3031 | 10.019 | 7.006  | 8.012  | 16.891 | 11.063 |
| 12 | 0.3041 | 8.916  | 13.364 | 10.431 | 24.111 | 16.675 |
| 12 | 0.3051 | 12.666 | 7.982  | 11.396 | 26.257 | 17.013 |
| 12 | 0.3061 | 20.663 | 14.530 | 13.072 | 25.476 | 12.679 |
| 12 | 0.3071 | 22.513 | 8.558  | 11.056 | 20.270 | 21.967 |
| 12 | 0.3081 | 22.596 | 17.139 | 13.167 | 23.838 | 25.045 |
| 12 | 0.3091 | 31.580 | 25.703 | 18.054 | 19.169 | 19.570 |
| 12 | 0.3101 | 18.414 | 15.457 | 12.642 | 20.737 | 14.055 |
| 12 | 0.3111 | 9.530  | 15.882 | 8.979  | 21.837 | 13.135 |
| 12 | 0.3121 | 13.675 | 9.253  | 12.667 | 21.048 | 16.368 |
| 12 | 0.3131 | 15.414 | 14.559 | 16.550 | 12.563 | 14.952 |
| 12 | 0.3141 | 12.759 | 12.726 | 11.323 | 20.953 | 15.644 |
| 12 | 0.3151 | 16.192 | 14.889 | 11.456 | 10.048 | 13.560 |
| 12 | 0.3161 | 23.611 | 13.882 | 15.312 | 6.124  | 14.467 |
| 12 | 0.3171 | 17.357 | 15.216 | 9.950  | 15.789 | 10.698 |
| 12 | 0.3181 | 18.095 | 17.026 | 12.188 | 19.712 | 10.505 |
| 12 | 0.3191 | 14.631 | 11.653 | 8.191  | 15.965 | 18.690 |
| 12 | 0.3201 | 11.055 | 5.181  | 6.824  | 16.385 | 21.225 |
| 12 | 0.3211 | 16.633 | 16.010 | 16.023 | 14.876 | 16.188 |
| 12 | 0.3221 | 19.437 | 20.975 | 16.596 | 18.764 | 35.552 |
| 12 | 0.3231 | 19.047 | 18.334 | 15.897 | 10.710 | 13.770 |
| 12 | 0.3241 | 12.052 | 12.341 | 11.729 | 10.461 | 9.863  |
| 12 | 0.3251 | 3.600  | 5.244  | 4.904  | 12.058 | 7.623  |
| 12 | 0.3261 | 13.798 | 18.332 | 9.753  | 16.552 | 12.839 |
| 12 | 0.3271 | 10.649 | 11.563 | 13.123 | 17.075 | 14.117 |
| 12 | 0.3281 | 12.801 | 12.141 | 14.177 | 22.087 | 18.810 |
| 12 | 0.3291 | 13.497 | 12.107 | 10.967 | 16.345 | 15.509 |
| 12 | 0.3301 | 32.806 | 22.445 | 24.378 | 20.489 | 19.469 |
| 12 | 0.3311 | 24.294 | 20.146 | 16.835 | 16.656 | 17.829 |
| 12 | 0.3321 | 8.721  | 7.561  | 5.735  | 13.674 | 10.421 |
| 12 | 0.3331 | 5.092  | 4.234  | 4.216  | 7.454  | 7.970  |
| 12 | 0.3341 | 13.421 | 15.932 | 12.304 | 19.369 | 18.982 |
| 12 | 0.3351 | 19.342 | 20.190 | 20.778 | 8.964  | 13.544 |
| 12 | 0.3361 | 8.219  | 4.007  | 6.664  | 3.902  | 7.501  |
| 12 | 0.3371 | 8.622  | 10.267 | 6.606  | 8.377  | 6.015  |
| 12 | 0.3381 | 15.493 | 19.293 | 10.391 | 15.492 | 16.241 |
| 12 | 0.3391 | 7.499  | 5.976  | 6.447  | 9.682  | 10.047 |
| 12 | 0.3401 | 11.180 | 11.845 | 6.276  | 14.473 | 8.499  |
| 12 | 0.3411 | 7.803  | 8.291  | 5.300  | 14.840 | 5.719  |

|    |        |        |        |        |        |        |
|----|--------|--------|--------|--------|--------|--------|
| 12 | 0.3421 | 11.825 | 12.481 | 9.985  | 12.724 | 9.058  |
| 12 | 0.3431 | 3.398  | 0.620  | 1.962  | 6.542  | 4.828  |
| 12 | 0.3441 | 6.109  | 6.227  | 4.262  | 8.075  | 7.078  |
| 12 | 0.3451 | 15.160 | 9.902  | 13.547 | 14.832 | 21.410 |
| 12 | 0.3461 | 16.168 | 10.539 | 16.200 | 12.499 | 13.299 |
| 12 | 0.3471 | 9.757  | 10.712 | 12.229 | 2.452  | 4.349  |
| 12 | 0.3481 | 23.345 | 15.290 | 18.130 | 13.120 | 21.164 |
| 12 | 0.3491 | 16.805 | 15.209 | 9.606  | 14.499 | 18.123 |
| 12 | 0.3501 | 19.634 | 24.904 | 16.319 | 13.117 | 17.063 |
| 12 | 0.3511 | 12.306 | 13.060 | 12.890 | 7.180  | 3.479  |
| 12 | 0.3521 | 9.102  | 7.287  | 8.083  | 14.045 | 10.368 |
| 12 | 0.3531 | 7.737  | 4.868  | 7.166  | 15.059 | 14.089 |
| 12 | 0.3541 | 7.570  | 5.756  | 7.248  | 20.148 | 9.126  |
| 12 | 0.3551 | 9.716  | 5.124  | 9.532  | 24.450 | 8.855  |
| 12 | 0.3561 | 5.306  | 10.947 | 7.842  | 16.460 | 8.940  |
| 12 | 0.3571 | 11.884 | 8.384  | 12.547 | 20.217 | 9.126  |
| 12 | 0.3581 | 11.703 | 7.773  | 12.048 | 15.357 | 8.808  |
| 12 | 0.3591 | 13.076 | 12.811 | 12.928 | 18.055 | 7.048  |
| 12 | 0.3601 | 16.097 | 10.009 | 9.853  | 28.229 | 25.123 |
| 12 | 0.3611 | 16.730 | 10.715 | 10.024 | 10.476 | 8.068  |
| 12 | 0.3621 | 13.357 | 4.493  | 7.391  | 12.823 | 9.472  |
| 12 | 0.3631 | 7.142  | 5.571  | 4.314  | 13.669 | 10.953 |
| 12 | 0.3641 | 8.989  | 8.785  | 10.359 | 4.951  | 5.359  |
| 12 | 0.3651 | 13.223 | 9.756  | 11.439 | 12.961 | 14.572 |
| 12 | 0.3661 | 8.796  | 7.090  | 8.215  | 8.034  | 12.411 |
| 12 | 0.3671 | 10.844 | 16.638 | 10.129 | 11.697 | 6.988  |
| 12 | 0.3681 | 12.754 | 12.552 | 13.219 | 15.473 | 5.885  |
| 12 | 0.3691 | 14.734 | 8.350  | 17.356 | 18.713 | 11.238 |
| 12 | 0.3701 | 6.040  | 5.180  | 8.122  | 3.861  | 4.117  |
| 12 | 0.3711 | 14.134 | 8.054  | 11.704 | 22.137 | 17.468 |
| 12 | 0.3721 | 18.247 | 8.550  | 10.198 | 19.555 | 19.941 |
| 12 | 0.3731 | 6.799  | 4.760  | 3.295  | 12.669 | 8.243  |
| 12 | 0.3741 | 2.589  | 2.225  | 2.768  | 14.054 | 6.244  |
| 12 | 0.3751 | 9.513  | 9.204  | 11.421 | 23.027 | 17.401 |
| 12 | 0.3761 | 17.046 | 12.049 | 12.372 | 14.432 | 16.773 |
| 12 | 0.3771 | 13.157 | 19.981 | 13.640 | 24.378 | 13.119 |
| 12 | 0.3781 | 12.475 | 13.589 | 13.378 | 18.235 | 21.009 |
| 12 | 0.3791 | 18.621 | 14.547 | 13.537 | 16.820 | 9.522  |
| 12 | 0.3801 | 11.474 | 7.396  | 13.015 | 16.382 | 11.338 |
| 12 | 0.3811 | 17.468 | 16.506 | 15.150 | 18.865 | 18.856 |
| 12 | 0.3821 | 18.067 | 16.574 | 15.437 | 31.209 | 20.935 |
| 12 | 0.3831 | 18.578 | 20.308 | 16.263 | 15.836 | 17.997 |
| 12 | 0.3841 | 12.782 | 12.288 | 8.951  | 19.883 | 22.569 |
| 12 | 0.3851 | 12.421 | 15.949 | 10.181 | 27.786 | 22.334 |
| 12 | 0.3861 | 11.891 | 13.827 | 11.232 | 21.867 | 15.782 |
| 12 | 0.3871 | 3.600  | 6.280  | 6.040  | 4.360  | 13.017 |
| 12 | 0.3881 | 6.160  | 3.157  | 5.829  | 6.547  | 9.993  |
| 12 | 0.3891 | 14.141 | 7.533  | 12.556 | 21.162 | 21.297 |
| 12 | 0.3901 | 9.441  | 5.886  | 9.447  | 14.204 | 7.588  |
| 12 | 0.3911 | 14.346 | 17.810 | 15.949 | 14.405 | 8.655  |

|    |        |        |        |        |        |        |
|----|--------|--------|--------|--------|--------|--------|
| 12 | 0.3921 | 10.574 | 8.019  | 6.849  | 18.784 | 15.730 |
| 12 | 0.3931 | 4.533  | 7.192  | 5.279  | 13.692 | 11.905 |
| 12 | 0.3941 | 6.186  | 6.162  | 6.931  | 14.812 | 8.737  |
| 12 | 0.3951 | 6.069  | 6.297  | 7.852  | 15.571 | 7.911  |
| 12 | 0.3961 | 7.067  | 7.095  | 6.549  | 18.977 | 11.866 |
| 12 | 0.3971 | 4.499  | 7.164  | 4.652  | 23.975 | 8.881  |
| 12 | 0.3981 | 8.973  | 7.265  | 5.896  | 26.698 | 12.734 |
| 12 | 0.3991 | 7.287  | 8.388  | 4.769  | 10.584 | 6.722  |
| 12 | 0.4001 | 10.294 | 14.862 | 10.327 | 15.395 | 15.303 |
| 12 | 0.4011 | 6.093  | 9.520  | 4.364  | 11.714 | 9.375  |
| 12 | 0.4021 | 5.806  | 7.623  | 5.120  | 7.116  | 10.896 |
| 12 | 0.4031 | 6.396  | 7.263  | 4.014  | 6.550  | 13.698 |
| 12 | 0.4041 | 3.178  | 5.738  | 4.436  | 6.490  | 6.877  |
| 12 | 0.4051 | 2.885  | 4.514  | 3.923  | 6.347  | 4.641  |
| 12 | 0.4061 | 11.069 | 7.808  | 7.947  | 8.503  | 9.215  |
| 12 | 0.4071 | 9.612  | 9.161  | 10.579 | 12.354 | 12.222 |
| 12 | 0.4081 | 20.854 | 14.476 | 20.029 | 12.324 | 12.130 |
| 12 | 0.4091 | 21.843 | 13.254 | 19.223 | 18.287 | 19.938 |
| 12 | 0.4101 | 22.350 | 13.345 | 19.448 | 18.052 | 19.584 |
| 12 | 0.4111 | 21.974 | 13.281 | 19.126 | 17.395 | 19.045 |
| 12 | 0.4121 | 18.587 | 14.286 | 12.258 | 10.766 | 18.655 |
| 12 | 0.4131 | 17.947 | 14.286 | 12.286 | 10.779 | 18.637 |
| 12 | 0.4141 | 13.855 | 17.965 | 16.264 | 14.424 | 15.533 |
| 12 | 0.4151 | 10.763 | 18.397 | 12.232 | 15.722 | 18.429 |
| 12 | 0.4161 | 8.641  | 9.308  | 13.219 | 14.795 | 10.778 |
| 12 | 0.4171 | 15.898 | 10.615 | 19.661 | 12.063 | 24.539 |
| 12 | 0.4181 | 10.525 | 10.133 | 7.874  | 10.500 | 21.721 |
| 12 | 0.4191 | 6.370  | 8.277  | 7.956  | 8.134  | 9.928  |
| 12 | 0.4201 | 12.267 | 15.257 | 17.196 | 7.293  | 11.174 |
| 12 | 0.4211 | 11.136 | 12.819 | 13.822 | 14.244 | 7.251  |
| 12 | 0.4221 | 16.759 | 16.616 | 14.196 | 11.087 | 9.211  |
| 12 | 0.4231 | 10.315 | 12.854 | 6.808  | 16.992 | 14.449 |
| 12 | 0.4241 | 8.574  | 11.692 | 5.806  | 10.059 | 13.625 |
| 12 | 0.4251 | 12.954 | 16.965 | 16.988 | 16.677 | 17.876 |
| 12 | 0.4261 | 14.016 | 16.684 | 13.292 | 11.712 | 13.301 |
| 12 | 0.4271 | 9.993  | 8.784  | 7.429  | 14.593 | 16.893 |
| 12 | 0.4281 | 10.111 | 11.485 | 10.285 | 17.662 | 23.599 |
| 12 | 0.4291 | 10.145 | 11.107 | 11.922 | 14.582 | 23.378 |
| 12 | 0.4301 | 7.026  | 10.649 | 10.882 | 25.329 | 25.730 |
| 12 | 0.4311 | 16.638 | 16.110 | 13.048 | 23.508 | 13.703 |
| 12 | 0.4321 | 18.534 | 19.593 | 19.232 | 15.628 | 10.676 |
| 12 | 0.4331 | 14.116 | 13.818 | 17.106 | 13.539 | 6.342  |
| 12 | 0.4341 | 11.918 | 19.761 | 12.345 | 22.957 | 16.391 |
| 12 | 0.4351 | 9.813  | 14.417 | 9.108  | 11.010 | 4.691  |
| 12 | 0.4361 | 10.834 | 8.763  | 7.928  | 12.461 | 13.813 |
| 12 | 0.4371 | 15.410 | 13.143 | 13.987 | 14.214 | 15.339 |
| 12 | 0.4381 | 16.908 | 12.640 | 9.246  | 16.010 | 18.139 |
| 12 | 0.4391 | 5.838  | 7.067  | 10.563 | 10.879 | 13.695 |
| 12 | 0.4401 | 11.000 | 4.944  | 6.996  | 23.335 | 16.101 |
| 12 | 0.4411 | 13.909 | 8.918  | 10.660 | 14.526 | 10.608 |

|    |        |        |        |        |        |        |
|----|--------|--------|--------|--------|--------|--------|
| 12 | 0.4421 | 13.639 | 11.551 | 13.096 | 12.058 | 9.256  |
| 12 | 0.4431 | 13.882 | 16.126 | 14.046 | 17.873 | 16.563 |
| 12 | 0.4441 | 16.389 | 11.344 | 10.287 | 8.526  | 18.212 |
| 12 | 0.4451 | 11.232 | 4.535  | 3.975  | 12.018 | 18.654 |
| 12 | 0.4461 | 8.021  | 6.030  | 6.223  | 11.970 | 14.040 |
| 12 | 0.4471 | 20.041 | 22.852 | 18.535 | 10.876 | 20.031 |
| 12 | 0.4481 | 11.437 | 10.815 | 12.244 | 5.756  | 9.187  |
| 12 | 0.4491 | 10.100 | 13.218 | 14.992 | 13.183 | 26.090 |
| 12 | 0.4501 | 12.307 | 14.056 | 14.612 | 9.136  | 11.727 |
| 12 | 0.4511 | 24.524 | 27.966 | 28.124 | 14.991 | 21.107 |
| 12 | 0.4521 | 15.265 | 20.123 | 16.094 | 10.905 | 10.204 |
| 12 | 0.4531 | 21.354 | 22.994 | 13.750 | 10.476 | 6.671  |
| 12 | 0.4541 | 7.554  | 12.410 | 5.739  | 12.546 | 9.459  |
| 12 | 0.4551 | 8.302  | 9.218  | 6.415  | 10.543 | 12.537 |
| 12 | 0.4561 | 13.928 | 12.484 | 10.544 | 8.052  | 6.908  |
| 12 | 0.4571 | 10.072 | 12.402 | 10.789 | 16.033 | 22.252 |
| 12 | 0.4581 | 9.464  | 15.502 | 13.107 | 15.316 | 22.366 |
| 12 | 0.4591 | 15.143 | 20.493 | 11.826 | 11.771 | 12.363 |
| 12 | 0.4601 | 17.135 | 16.396 | 12.180 | 12.600 | 13.958 |
| 12 | 0.4611 | 17.187 | 22.570 | 16.106 | 6.401  | 16.831 |
| 12 | 0.4621 | 21.954 | 20.259 | 21.761 | 14.183 | 21.526 |
| 12 | 0.4631 | 9.886  | 18.280 | 12.163 | 17.758 | 13.439 |
| 12 | 0.4641 | 14.614 | 8.385  | 12.782 | 16.114 | 24.463 |
| 12 | 0.4651 | 12.769 | 10.902 | 8.644  | 8.370  | 22.072 |
| 12 | 0.4661 | 20.428 | 23.844 | 21.666 | 15.078 | 16.185 |
| 12 | 0.4671 | 10.298 | 17.102 | 10.015 | 20.963 | 20.401 |
| 12 | 0.4681 | 26.534 | 22.271 | 23.664 | 9.043  | 15.806 |
| 12 | 0.4691 | 26.723 | 27.285 | 25.884 | 11.583 | 14.620 |
| 12 | 0.4701 | 16.841 | 17.066 | 22.090 | 8.851  | 8.959  |
| 12 | 0.4711 | 18.757 | 19.999 | 17.034 | 6.560  | 11.696 |
| 12 | 0.4721 | 9.761  | 21.358 | 12.920 | 14.658 | 17.977 |
| 12 | 0.4731 | 10.112 | 21.694 | 16.983 | 10.852 | 13.448 |
| 12 | 0.4741 | 9.947  | 11.473 | 12.546 | 10.543 | 11.557 |
| 12 | 0.4751 | 7.424  | 9.229  | 8.114  | 10.276 | 12.140 |
| 12 | 0.4761 | 8.767  | 8.118  | 8.024  | 12.834 | 8.169  |
| 12 | 0.4771 | 8.079  | 5.202  | 7.479  | 10.699 | 7.760  |
| 12 | 0.4781 | 11.773 | 6.371  | 9.320  | 6.571  | 10.631 |
| 12 | 0.4791 | 19.517 | 15.814 | 12.587 | 7.063  | 9.326  |
| 12 | 0.4801 | 2.310  | 3.286  | 2.304  | 4.030  | 8.669  |
| 12 | 0.4811 | 5.724  | 10.355 | 8.444  | 18.506 | 24.488 |
| 12 | 0.4821 | 18.767 | 24.179 | 20.225 | 23.162 | 13.014 |
| 12 | 0.4831 | 10.688 | 15.119 | 11.950 | 10.726 | 18.579 |
| 12 | 0.4841 | 16.822 | 10.501 | 12.533 | 9.910  | 16.154 |
| 12 | 0.4851 | 22.275 | 24.055 | 18.461 | 14.804 | 19.514 |
| 12 | 0.4861 | 13.173 | 10.007 | 9.974  | 13.696 | 15.542 |
| 12 | 0.4871 | 8.901  | 6.939  | 8.484  | 9.151  | 8.185  |
| 12 | 0.4881 | 19.077 | 8.047  | 12.673 | 14.402 | 22.090 |
| 12 | 0.4891 | 12.679 | 13.185 | 8.715  | 15.023 | 20.065 |
| 12 | 0.4901 | 17.267 | 16.447 | 14.920 | 10.838 | 9.167  |
| 12 | 0.4911 | 21.940 | 20.201 | 17.097 | 7.845  | 13.231 |

|    |        |        |        |        |        |        |
|----|--------|--------|--------|--------|--------|--------|
| 12 | 0.4921 | 14.320 | 16.538 | 16.874 | 7.862  | 13.464 |
| 12 | 0.4931 | 17.299 | 22.335 | 19.314 | 10.282 | 19.207 |
| 12 | 0.4941 | 23.024 | 27.187 | 20.211 | 18.448 | 18.456 |
| 12 | 0.4951 | 28.263 | 22.616 | 27.326 | 13.667 | 9.657  |
| 12 | 0.4961 | 14.932 | 13.860 | 17.421 | 3.601  | 10.818 |
| 12 | 0.4971 | 20.496 | 20.924 | 14.012 | 16.106 | 10.563 |
| 12 | 0.4981 | 25.040 | 19.465 | 17.821 | 6.048  | 23.675 |
| 12 | 0.4991 | 13.028 | 10.582 | 9.718  | 10.554 | 17.092 |
| 12 | 0.5001 | 15.268 | 12.369 | 11.128 | 9.234  | 14.712 |
| 12 | 0.5011 | 22.555 | 23.131 | 15.096 | 12.446 | 13.548 |
| 12 | 0.5021 | 29.415 | 21.745 | 16.930 | 11.525 | 20.978 |
| 12 | 0.5031 | 15.324 | 12.124 | 11.039 | 13.617 | 4.487  |
| 12 | 0.5041 | 10.504 | 10.848 | 9.599  | 18.807 | 15.106 |
| 12 | 0.5051 | 19.699 | 12.102 | 7.623  | 12.291 | 17.146 |
| 12 | 0.5061 | 19.368 | 12.078 | 7.656  | 12.527 | 16.607 |
| 12 | 0.5071 | 15.314 | 6.950  | 7.708  | 8.876  | 14.815 |
| 12 | 0.5081 | 20.198 | 10.739 | 13.838 | 16.804 | 21.434 |
| 12 | 0.5091 | 8.072  | 3.337  | 9.198  | 10.978 | 14.454 |
| 12 | 0.5101 | 16.095 | 10.165 | 12.269 | 16.616 | 12.004 |
| 12 | 0.5111 | 18.346 | 15.185 | 14.473 | 16.428 | 14.623 |
| 12 | 0.5121 | 23.802 | 12.928 | 17.257 | 10.126 | 8.555  |
| 12 | 0.5131 | 12.328 | 8.567  | 7.780  | 9.211  | 16.268 |
| 12 | 0.5141 | 13.618 | 7.046  | 10.898 | 8.981  | 22.009 |
| 12 | 0.5151 | 14.390 | 11.545 | 11.717 | 18.851 | 17.843 |
| 12 | 0.5161 | 17.977 | 10.349 | 11.721 | 13.049 | 16.200 |
| 12 | 0.5171 | 12.823 | 10.918 | 10.195 | 7.908  | 3.668  |
| 12 | 0.5181 | 6.897  | 5.392  | 5.905  | 6.333  | 8.218  |
| 12 | 0.5191 | 12.515 | 9.252  | 10.271 | 17.086 | 9.066  |
| 12 | 0.5201 | 15.863 | 9.057  | 11.105 | 12.499 | 12.539 |
| 12 | 0.5211 | 11.867 | 10.146 | 13.395 | 8.812  | 12.884 |
| 12 | 0.5221 | 12.028 | 11.505 | 14.641 | 8.770  | 13.145 |
| 12 | 0.5231 | 11.433 | 10.774 | 10.315 | 7.809  | 14.688 |
| 12 | 0.5241 | 7.774  | 10.379 | 5.512  | 19.266 | 9.955  |
| 12 | 0.5251 | 9.283  | 5.433  | 10.602 | 14.321 | 19.300 |
| 12 | 0.5261 | 9.405  | 5.873  | 7.934  | 11.637 | 8.032  |
| 12 | 0.5271 | 8.686  | 7.675  | 8.408  | 13.930 | 6.058  |
| 12 | 0.5281 | 8.980  | 11.621 | 8.832  | 13.421 | 10.621 |
| 12 | 0.5291 | 9.967  | 12.401 | 5.966  | 6.256  | 8.548  |
| 12 | 0.5301 | 18.180 | 16.602 | 15.090 | 8.226  | 9.683  |
| 12 | 0.5311 | 7.695  | 11.051 | 8.894  | 8.202  | 10.559 |
| 12 | 0.5321 | 7.696  | 9.503  | 7.087  | 10.770 | 9.370  |
| 12 | 0.5331 | 8.567  | 11.019 | 7.041  | 12.878 | 7.083  |
| 12 | 0.5341 | 8.633  | 13.688 | 6.453  | 8.608  | 5.330  |
| 12 | 0.5351 | 7.381  | 10.573 | 7.129  | 10.683 | 13.749 |
| 12 | 0.5361 | 6.585  | 5.858  | 4.635  | 14.353 | 10.078 |
| 12 | 0.5371 | 9.061  | 9.827  | 6.241  | 18.026 | 6.368  |
| 12 | 0.5381 | 10.254 | 9.392  | 11.114 | 6.195  | 5.307  |
| 12 | 0.5391 | 9.949  | 7.229  | 4.820  | 21.470 | 23.711 |
| 12 | 0.5401 | 11.519 | 13.107 | 9.590  | 12.702 | 8.990  |
| 12 | 0.5411 | 30.674 | 20.014 | 22.945 | 9.913  | 10.372 |

|    |        |        |        |        |        |        |
|----|--------|--------|--------|--------|--------|--------|
| 12 | 0.5421 | 19.900 | 13.723 | 17.918 | 12.391 | 6.279  |
| 12 | 0.5431 | 28.281 | 18.291 | 20.203 | 9.576  | 18.614 |
| 12 | 0.5441 | 18.072 | 12.071 | 12.686 | 13.333 | 13.081 |
| 12 | 0.5451 | 13.959 | 11.978 | 12.163 | 8.591  | 9.915  |
| 12 | 0.5461 | 14.222 | 19.835 | 14.487 | 24.884 | 16.489 |
| 12 | 0.5471 | 16.575 | 12.692 | 9.603  | 15.925 | 15.148 |
| 12 | 0.5481 | 22.595 | 21.616 | 21.669 | 16.194 | 15.497 |
| 12 | 0.5491 | 17.515 | 12.444 | 12.601 | 13.685 | 19.637 |
| 12 | 0.5501 | 17.483 | 10.952 | 10.311 | 16.745 | 14.849 |
| 12 | 0.5511 | 11.616 | 12.615 | 13.249 | 15.252 | 8.094  |
| 12 | 0.5521 | 13.753 | 14.509 | 10.390 | 8.282  | 5.602  |
| 12 | 0.5531 | 18.815 | 18.318 | 11.914 | 23.267 | 20.149 |
| 12 | 0.5541 | 12.308 | 10.361 | 10.536 | 20.263 | 13.350 |
| 12 | 0.5551 | 18.835 | 14.256 | 15.942 | 31.590 | 22.139 |
| 12 | 0.5561 | 21.363 | 29.168 | 25.521 | 16.974 | 9.187  |
| 12 | 0.5571 | 16.475 | 18.764 | 13.790 | 7.021  | 15.491 |
| 12 | 0.5581 | 11.309 | 11.883 | 10.419 | 8.592  | 9.727  |
| 12 | 0.5591 | 10.928 | 19.184 | 12.603 | 19.941 | 12.824 |
| 12 | 0.5601 | 26.980 | 30.169 | 19.087 | 19.832 | 16.472 |
| 12 | 0.5611 | 18.199 | 13.280 | 13.367 | 16.139 | 14.918 |
| 12 | 0.5621 | 8.094  | 4.803  | 3.478  | 9.245  | 13.473 |
| 12 | 0.5631 | 6.196  | 1.054  | 1.485  | 5.745  | 17.276 |
| 12 | 0.5641 | 13.578 | 13.859 | 14.254 | 14.869 | 19.518 |
| 12 | 0.5651 | 17.776 | 14.960 | 18.068 | 12.912 | 11.447 |
| 12 | 0.5661 | 15.965 | 13.270 | 13.719 | 8.852  | 8.838  |
| 12 | 0.5671 | 18.417 | 18.157 | 14.151 | 8.942  | 12.285 |
| 12 | 0.5681 | 12.836 | 12.051 | 11.720 | 8.550  | 8.511  |
| 12 | 0.5691 | 11.338 | 9.112  | 10.727 | 18.581 | 11.067 |
| 12 | 0.5701 | 14.358 | 13.818 | 15.083 | 8.785  | 16.564 |
| 12 | 0.5711 | 8.193  | 8.986  | 8.929  | 7.185  | 3.418  |
| 12 | 0.5721 | 12.944 | 16.755 | 13.376 | 10.586 | 10.458 |
| 12 | 0.5731 | 15.657 | 10.727 | 13.534 | 13.280 | 13.677 |
| 12 | 0.5741 | 11.852 | 12.022 | 9.669  | 10.696 | 10.459 |
| 12 | 0.5751 | 18.051 | 20.471 | 10.492 | 10.868 | 12.926 |
| 12 | 0.5761 | 17.398 | 12.140 | 10.463 | 7.155  | 17.235 |
| 12 | 0.5771 | 11.957 | 6.768  | 4.122  | 6.804  | 16.346 |
| 12 | 0.5781 | 7.085  | 2.352  | 2.190  | 12.781 | 11.008 |
| 12 | 0.5791 | 13.532 | 19.734 | 14.899 | 19.354 | 7.078  |
| 12 | 0.5801 | 14.832 | 18.217 | 12.604 | 14.359 | 14.046 |
| 12 | 0.5811 | 16.831 | 20.250 | 15.350 | 12.379 | 11.389 |
| 12 | 0.5821 | 10.532 | 11.689 | 8.366  | 11.776 | 11.958 |
| 12 | 0.5831 | 11.889 | 12.553 | 10.576 | 15.903 | 14.954 |
| 12 | 0.5841 | 28.702 | 25.396 | 21.404 | 13.841 | 11.511 |
| 12 | 0.5851 | 18.550 | 12.538 | 18.656 | 9.352  | 7.730  |
| 12 | 0.5861 | 14.347 | 13.383 | 14.620 | 17.335 | 16.106 |
| 12 | 0.5871 | 16.028 | 14.623 | 16.529 | 17.297 | 16.094 |
| 12 | 0.5881 | 11.313 | 10.649 | 10.544 | 4.402  | 16.972 |
| 12 | 0.5891 | 12.980 | 14.350 | 11.065 | 8.610  | 11.029 |
| 12 | 0.5901 | 13.236 | 9.951  | 14.701 | 10.183 | 13.018 |
| 12 | 0.5911 | 20.194 | 20.118 | 23.384 | 10.589 | 18.794 |

|    |        |        |        |        |        |        |
|----|--------|--------|--------|--------|--------|--------|
| 12 | 0.5921 | 22.329 | 19.840 | 26.906 | 7.863  | 10.816 |
| 12 | 0.5931 | 11.910 | 13.981 | 19.986 | 7.663  | 14.918 |
| 12 | 0.5941 | 17.909 | 17.304 | 24.520 | 7.797  | 12.769 |
| 12 | 0.5951 | 13.206 | 11.304 | 14.746 | 6.790  | 7.432  |
| 12 | 0.5961 | 17.378 | 17.113 | 15.785 | 12.473 | 5.637  |
| 12 | 0.5971 | 21.344 | 17.446 | 16.579 | 14.253 | 14.515 |
| 12 | 0.5981 | 21.419 | 16.920 | 16.202 | 14.561 | 14.937 |
| 12 | 0.5991 | 9.291  | 16.519 | 16.369 | 14.577 | 8.797  |
| 12 | 0.6001 | 12.348 | 18.175 | 17.712 | 14.282 | 10.163 |
| 12 | 0.6011 | 12.241 | 16.834 | 17.886 | 13.489 | 6.485  |
| 12 | 0.6021 | 14.719 | 17.848 | 17.289 | 14.818 | 7.822  |
| 12 | 0.6031 | 21.057 | 20.606 | 23.116 | 14.863 | 4.742  |
| 12 | 0.6041 | 24.863 | 17.737 | 21.646 | 14.270 | 4.719  |
| 12 | 0.6051 | 24.914 | 17.915 | 21.700 | 14.238 | 4.746  |
| 12 | 0.6061 | 15.419 | 10.585 | 12.038 | 13.176 | 8.065  |
| 12 | 0.6071 | 22.765 | 21.319 | 19.618 | 11.951 | 3.537  |
| 12 | 0.6081 | 14.934 | 18.256 | 18.489 | 15.000 | 12.952 |
| 12 | 0.6091 | 14.296 | 22.633 | 18.037 | 20.146 | 17.308 |
| 12 | 0.6101 | 30.468 | 33.539 | 36.246 | 15.155 | 8.283  |
| 12 | 0.6111 | 19.193 | 24.151 | 30.999 | 12.794 | 2.870  |
| 12 | 0.6121 | 22.214 | 19.841 | 29.179 | 8.659  | 4.614  |
| 12 | 0.6131 | 17.611 | 17.162 | 24.646 | 15.059 | 6.958  |
| 12 | 0.6141 | 26.290 | 25.469 | 30.294 | 9.605  | 14.636 |
| 12 | 0.6151 | 22.006 | 19.672 | 25.302 | 5.445  | 7.020  |
| 12 | 0.6161 | 13.492 | 11.494 | 19.717 | 12.745 | 21.801 |
| 12 | 0.6171 | 22.772 | 27.298 | 25.910 | 9.114  | 11.722 |
| 12 | 0.6181 | 23.426 | 28.997 | 26.460 | 8.565  | 12.733 |
| 12 | 0.6191 | 17.271 | 14.097 | 17.214 | 5.713  | 10.723 |
| 12 | 0.6201 | 22.818 | 15.461 | 21.037 | 14.234 | 6.322  |
| 12 | 0.6211 | 20.476 | 14.412 | 21.637 | 12.287 | 13.483 |
| 12 | 0.6221 | 18.065 | 19.186 | 23.436 | 10.674 | 17.838 |
| 12 | 0.6231 | 13.577 | 17.464 | 21.012 | 7.151  | 8.517  |
| 12 | 0.6241 | 12.263 | 11.145 | 15.096 | 6.171  | 12.334 |
| 12 | 0.6251 | 22.879 | 21.900 | 32.783 | 17.457 | 16.234 |
| 12 | 0.6261 | 24.098 | 20.330 | 27.105 | 22.356 | 13.189 |
| 12 | 0.6271 | 26.764 | 18.114 | 24.627 | 9.433  | 10.352 |
| 12 | 0.6281 | 15.771 | 20.228 | 16.503 | 10.832 | 9.794  |
| 12 | 0.6291 | 10.746 | 17.269 | 11.060 | 15.999 | 10.802 |
| 12 | 0.6301 | 12.496 | 11.262 | 13.065 | 16.156 | 15.026 |
| 12 | 0.6311 | 14.983 | 17.908 | 22.641 | 13.765 | 20.731 |
| 12 | 0.6321 | 14.994 | 14.637 | 22.348 | 15.417 | 17.512 |
| 12 | 0.6331 | 14.593 | 14.015 | 20.219 | 10.916 | 10.063 |
| 12 | 0.6341 | 8.773  | 11.911 | 11.749 | 14.416 | 14.140 |
| 12 | 0.6351 | 7.458  | 8.714  | 12.442 | 4.852  | 11.471 |
| 12 | 0.6361 | 19.502 | 26.433 | 19.745 | 7.566  | 28.730 |
| 12 | 0.6371 | 15.640 | 21.947 | 18.640 | 11.844 | 22.196 |
| 12 | 0.6381 | 9.791  | 15.407 | 15.393 | 7.690  | 19.056 |
| 12 | 0.6391 | 7.988  | 8.953  | 14.403 | 4.151  | 10.111 |
| 12 | 0.6401 | 7.178  | 11.845 | 13.180 | 7.905  | 17.079 |
| 12 | 0.6411 | 16.922 | 14.435 | 20.378 | 5.505  | 12.092 |

|    |        |        |        |        |        |        |
|----|--------|--------|--------|--------|--------|--------|
| 12 | 0.6421 | 13.869 | 16.893 | 15.775 | 5.972  | 14.493 |
| 12 | 0.6431 | 9.659  | 11.326 | 11.336 | 8.716  | 16.360 |
| 12 | 0.6441 | 3.503  | 5.287  | 6.357  | 12.992 | 6.180  |
| 12 | 0.6451 | 13.553 | 14.068 | 15.138 | 12.803 | 5.151  |
| 12 | 0.6461 | 12.520 | 11.241 | 16.359 | 10.146 | 22.305 |
| 12 | 0.6471 | 11.504 | 17.613 | 14.501 | 5.832  | 16.544 |
| 12 | 0.6481 | 16.608 | 20.742 | 21.510 | 13.037 | 17.991 |
| 12 | 0.6491 | 13.226 | 10.950 | 18.311 | 8.410  | 11.110 |
| 12 | 0.6501 | 15.290 | 15.482 | 16.757 | 14.863 | 25.290 |
| 12 | 0.6511 | 12.224 | 13.926 | 15.262 | 8.855  | 8.599  |
| 12 | 0.6521 | 7.136  | 8.213  | 9.362  | 6.869  | 8.224  |
| 12 | 0.6531 | 9.948  | 8.588  | 12.914 | 8.770  | 4.555  |
| 12 | 0.6541 | 15.881 | 10.168 | 16.323 | 17.475 | 17.915 |
| 12 | 0.6551 | 9.782  | 16.360 | 15.580 | 14.710 | 10.782 |
| 12 | 0.6561 | 16.595 | 13.315 | 20.869 | 15.899 | 12.533 |
| 12 | 0.6571 | 12.993 | 12.384 | 14.338 | 8.141  | 19.507 |
| 12 | 0.6581 | 8.538  | 10.581 | 14.502 | 8.316  | 16.986 |
| 12 | 0.6591 | 8.615  | 10.954 | 8.031  | 4.135  | 8.018  |
| 12 | 0.6601 | 7.511  | 9.102  | 9.004  | 8.462  | 15.683 |
| 12 | 0.6611 | 6.024  | 8.006  | 4.205  | 11.460 | 20.692 |
| 12 | 0.6621 | 21.689 | 10.953 | 16.141 | 14.389 | 19.743 |
| 12 | 0.6631 | 26.562 | 17.821 | 26.012 | 20.619 | 12.855 |
| 12 | 0.6641 | 29.548 | 23.867 | 28.595 | 10.161 | 14.613 |
| 12 | 0.6651 | 18.391 | 15.545 | 16.563 | 8.141  | 17.866 |
| 12 | 0.6661 | 20.961 | 15.877 | 22.716 | 8.359  | 16.187 |
| 12 | 0.6671 | 7.814  | 11.293 | 13.075 | 7.849  | 13.857 |
| 12 | 0.6681 | 10.689 | 17.520 | 13.514 | 14.473 | 17.082 |
| 12 | 0.6691 | 19.593 | 15.021 | 14.478 | 21.154 | 19.613 |
| 12 | 0.6701 | 15.845 | 13.894 | 14.405 | 7.380  | 12.260 |
| 12 | 0.6711 | 13.787 | 16.311 | 15.961 | 8.907  | 18.422 |
| 12 | 0.6721 | 12.875 | 18.478 | 15.241 | 16.636 | 23.739 |
| 12 | 0.6731 | 20.186 | 13.701 | 15.186 | 7.291  | 20.758 |
| 12 | 0.6741 | 11.675 | 12.978 | 11.279 | 7.594  | 12.763 |
| 12 | 0.6751 | 10.001 | 10.796 | 12.868 | 8.586  | 17.275 |
| 12 | 0.6761 | 9.351  | 14.565 | 13.269 | 15.723 | 22.560 |
| 12 | 0.6771 | 9.120  | 14.060 | 12.770 | 15.463 | 22.331 |
| 12 | 0.6781 | 8.918  | 13.559 | 12.284 | 15.214 | 22.094 |
| 12 | 0.6791 | 8.747  | 13.071 | 11.819 | 14.981 | 21.854 |
| 12 | 0.6801 | 8.611  | 12.603 | 11.384 | 14.768 | 21.616 |
| 12 | 0.6811 | 8.511  | 12.161 | 10.984 | 14.577 | 21.382 |
| 12 | 0.6821 | 8.446  | 11.750 | 10.624 | 14.412 | 21.156 |
| 12 | 0.6831 | 26.875 | 25.823 | 28.478 | 12.113 | 17.320 |
| 12 | 0.6841 | 12.220 | 12.502 | 14.510 | 11.328 | 7.249  |
| 12 | 0.6851 | 0.576  | 1.363  | 0.168  | 1.863  | 0.339  |
| 12 | 0.6861 | 8.679  | 10.157 | 7.787  | 9.489  | 14.334 |
| 12 | 0.6871 | 13.663 | 14.933 | 11.411 | 11.819 | 12.443 |
| 12 | 0.6881 | 15.654 | 10.298 | 15.242 | 11.595 | 11.383 |
| 12 | 0.6891 | 12.412 | 10.805 | 16.466 | 12.438 | 29.847 |
| 12 | 0.6901 | 8.833  | 11.676 | 14.430 | 9.224  | 12.485 |
| 12 | 0.6911 | 10.152 | 13.568 | 15.898 | 12.959 | 9.804  |



|    |        |        |        |        |        |        |
|----|--------|--------|--------|--------|--------|--------|
| 12 | 0.6921 | 17.619 | 23.706 | 26.181 | 20.945 | 22.199 |
| 12 | 0.6931 | 12.153 | 17.221 | 19.020 | 13.399 | 13.548 |
| 12 | 0.6941 | 4.223  | 11.898 | 12.075 | 4.189  | 18.021 |
| 12 | 0.6951 | 10.217 | 18.839 | 20.738 | 7.866  | 11.614 |
| 12 | 0.6961 | 11.531 | 12.470 | 15.222 | 15.567 | 14.099 |
| 12 | 0.6971 | 14.476 | 18.101 | 12.994 | 12.919 | 8.884  |
| 12 | 0.6981 | 11.874 | 12.321 | 11.332 | 11.035 | 15.659 |
| 12 | 0.6991 | 15.164 | 19.451 | 16.937 | 11.940 | 15.716 |
| 12 | 0.7001 | 10.461 | 18.356 | 16.135 | 18.313 | 8.125  |
| 12 | 0.7011 | 5.501  | 8.717  | 7.402  | 15.461 | 10.610 |
| 12 | 0.7021 | 13.788 | 20.338 | 22.814 | 16.670 | 12.790 |
| 12 | 0.7031 | 13.800 | 19.175 | 20.867 | 21.133 | 12.914 |
| 12 | 0.7041 | 8.109  | 8.541  | 9.602  | 13.699 | 12.675 |
| 12 | 0.7051 | 16.878 | 26.588 | 16.771 | 16.444 | 9.529  |
| 12 | 0.7061 | 12.918 | 22.047 | 18.846 | 16.285 | 16.609 |
| 12 | 0.7071 | 19.735 | 20.539 | 22.842 | 15.376 | 16.762 |
| 12 | 0.7081 | 30.592 | 25.773 | 28.700 | 14.871 | 15.380 |
| 12 | 0.7091 | 21.433 | 31.826 | 29.613 | 14.935 | 18.942 |
| 12 | 0.7101 | 18.700 | 20.713 | 20.457 | 23.215 | 20.220 |
| 12 | 0.7111 | 16.048 | 27.816 | 26.287 | 22.042 | 17.445 |
| 12 | 0.7121 | 17.125 | 16.662 | 15.997 | 20.248 | 15.039 |
| 12 | 0.7131 | 19.112 | 16.303 | 20.715 | 7.548  | 17.972 |
| 12 | 0.7141 | 22.688 | 23.549 | 26.527 | 11.892 | 11.567 |
| 12 | 0.7151 | 22.865 | 20.243 | 20.184 | 19.018 | 26.023 |
| 12 | 0.7161 | 17.900 | 18.418 | 16.184 | 11.415 | 14.892 |
| 12 | 0.7171 | 11.066 | 12.633 | 15.607 | 15.402 | 9.593  |
| 12 | 0.7181 | 19.040 | 29.409 | 26.180 | 22.075 | 17.471 |
| 12 | 0.7191 | 21.766 | 23.172 | 24.464 | 9.964  | 13.309 |
| 12 | 0.7201 | 24.353 | 18.980 | 17.973 | 13.568 | 10.259 |
| 12 | 0.7211 | 17.201 | 13.357 | 16.967 | 8.095  | 13.854 |
| 12 | 0.7221 | 10.902 | 5.634  | 11.753 | 11.807 | 22.859 |
| 12 | 0.7231 | 8.249  | 7.494  | 8.123  | 7.929  | 6.240  |
| 12 | 0.7241 | 19.799 | 7.780  | 13.612 | 6.983  | 14.048 |
| 12 | 0.7251 | 29.319 | 19.854 | 20.100 | 6.576  | 10.561 |
| 12 | 0.7261 | 14.840 | 17.738 | 13.633 | 6.624  | 13.944 |
| 12 | 0.7271 | 21.657 | 29.276 | 17.985 | 11.141 | 15.630 |
| 12 | 0.7281 | 24.450 | 31.889 | 25.983 | 10.773 | 22.131 |
| 12 | 0.7291 | 26.553 | 25.920 | 22.668 | 9.694  | 13.274 |
| 12 | 0.7301 | 29.280 | 30.188 | 31.315 | 11.498 | 17.928 |
| 12 | 0.7311 | 32.589 | 25.119 | 33.729 | 15.001 | 12.130 |
| 12 | 0.7321 | 15.010 | 13.879 | 17.040 | 17.235 | 11.726 |
| 12 | 0.7331 | 18.286 | 11.852 | 10.397 | 4.113  | 9.784  |
| 12 | 0.7341 | 13.606 | 26.064 | 18.923 | 19.072 | 9.099  |
| 12 | 0.7351 | 14.751 | 21.030 | 12.605 | 17.396 | 12.766 |
| 12 | 0.7361 | 15.099 | 17.531 | 13.981 | 10.948 | 10.982 |
| 12 | 0.7371 | 32.408 | 19.155 | 15.447 | 8.364  | 14.696 |
| 12 | 0.7381 | 11.902 | 14.653 | 8.909  | 18.903 | 7.930  |
| 12 | 0.7391 | 4.066  | 13.693 | 9.545  | 9.800  | 15.385 |
| 12 | 0.7401 | 12.788 | 13.705 | 9.024  | 8.452  | 19.091 |
| 12 | 0.7411 | 10.479 | 9.613  | 7.278  | 4.943  | 22.129 |

|    |        |        |        |        |        |        |
|----|--------|--------|--------|--------|--------|--------|
| 12 | 0.7421 | 16.007 | 13.852 | 13.312 | 11.238 | 16.073 |
| 12 | 0.7431 | 9.612  | 7.854  | 10.218 | 7.108  | 15.357 |
| 12 | 0.7441 | 12.041 | 17.725 | 15.885 | 2.300  | 12.074 |
| 12 | 0.7451 | 12.801 | 15.735 | 12.201 | 4.828  | 14.120 |
| 12 | 0.7461 | 21.749 | 20.361 | 17.222 | 7.446  | 20.617 |
| 12 | 0.7471 | 18.294 | 15.370 | 12.784 | 7.934  | 19.569 |
| 12 | 0.7481 | 18.097 | 15.037 | 12.691 | 8.010  | 19.549 |
| 12 | 0.7491 | 3.336  | 4.420  | 5.318  | 7.499  | 9.020  |
| 12 | 0.7501 | 6.473  | 7.205  | 8.896  | 7.236  | 10.448 |
| 12 | 0.7511 | 18.572 | 25.336 | 15.295 | 15.825 | 23.417 |
| 12 | 0.7521 | 9.272  | 11.589 | 9.489  | 11.823 | 22.298 |
| 12 | 0.7531 | 21.420 | 16.404 | 15.074 | 15.614 | 20.864 |
| 12 | 0.7541 | 26.051 | 22.553 | 31.806 | 10.877 | 27.893 |
| 12 | 0.7551 | 22.272 | 16.460 | 20.908 | 12.077 | 16.043 |
| 12 | 0.7561 | 13.172 | 12.650 | 17.227 | 13.828 | 25.565 |
| 12 | 0.7571 | 11.582 | 6.511  | 10.130 | 17.058 | 19.881 |
| 12 | 0.7581 | 9.835  | 5.078  | 10.525 | 7.046  | 18.715 |
| 12 | 0.7591 | 7.357  | 10.729 | 6.397  | 13.533 | 15.048 |
| 12 | 0.7601 | 25.312 | 16.176 | 16.535 | 5.795  | 18.525 |
| 12 | 0.7611 | 18.218 | 19.979 | 24.852 | 9.014  | 24.167 |
| 12 | 0.7621 | 8.124  | 9.303  | 15.582 | 6.415  | 14.809 |
| 12 | 0.7631 | 17.199 | 9.708  | 11.379 | 15.783 | 25.077 |
| 12 | 0.7641 | 15.654 | 20.595 | 21.279 | 16.052 | 7.899  |
| 12 | 0.7651 | 16.357 | 19.022 | 19.423 | 23.924 | 14.632 |
| 12 | 0.7661 | 8.971  | 11.379 | 13.196 | 6.968  | 10.919 |
| 12 | 0.7671 | 13.907 | 10.771 | 12.420 | 22.162 | 15.402 |
| 12 | 0.7681 | 19.680 | 8.246  | 9.119  | 28.852 | 25.949 |
| 12 | 0.7691 | 5.936  | 9.786  | 6.489  | 15.936 | 15.536 |
| 12 | 0.7701 | 9.788  | 13.816 | 9.335  | 10.840 | 14.176 |
| 12 | 0.7711 | 7.811  | 13.635 | 7.967  | 16.470 | 13.158 |
| 12 | 0.7721 | 9.675  | 13.193 | 11.090 | 15.474 | 16.931 |
| 12 | 0.7731 | 6.663  | 7.044  | 8.531  | 7.126  | 15.630 |
| 12 | 0.7741 | 12.763 | 16.814 | 11.924 | 15.473 | 16.232 |
| 12 | 0.7751 | 23.779 | 17.871 | 20.185 | 16.042 | 14.874 |
| 12 | 0.7761 | 12.131 | 10.139 | 10.681 | 9.251  | 23.351 |
| 12 | 0.7771 | 9.854  | 14.019 | 5.511  | 12.206 | 21.492 |
| 12 | 0.7781 | 11.997 | 21.669 | 14.908 | 17.087 | 5.714  |
| 12 | 0.7791 | 8.818  | 10.799 | 10.956 | 17.410 | 13.214 |
| 12 | 0.7801 | 10.423 | 11.885 | 10.613 | 13.471 | 9.506  |
| 12 | 0.7811 | 10.834 | 18.693 | 17.450 | 17.512 | 13.196 |
| 12 | 0.7821 | 11.026 | 15.522 | 9.231  | 11.155 | 13.968 |
| 12 | 0.7831 | 13.009 | 15.618 | 12.411 | 10.225 | 23.904 |
| 12 | 0.7841 | 26.491 | 24.867 | 26.003 | 16.432 | 21.117 |
| 12 | 0.7851 | 18.007 | 17.911 | 17.712 | 24.215 | 22.245 |
| 12 | 0.7861 | 12.606 | 14.523 | 9.085  | 13.369 | 13.573 |
| 12 | 0.7871 | 19.216 | 20.264 | 15.753 | 18.356 | 25.142 |
| 12 | 0.7881 | 15.028 | 19.063 | 18.322 | 12.423 | 11.143 |
| 12 | 0.7891 | 13.341 | 12.592 | 14.712 | 13.164 | 14.488 |
| 12 | 0.7901 | 12.728 | 21.474 | 18.698 | 10.265 | 18.889 |
| 12 | 0.7911 | 12.565 | 21.313 | 15.385 | 22.497 | 19.997 |

|    |        |        |        |        |        |        |
|----|--------|--------|--------|--------|--------|--------|
| 12 | 0.7921 | 9.632  | 8.565  | 9.000  | 10.162 | 15.685 |
| 12 | 0.7931 | 18.094 | 15.729 | 19.553 | 9.855  | 16.992 |
| 12 | 0.7941 | 13.860 | 27.608 | 16.721 | 17.301 | 24.511 |
| 12 | 0.7951 | 17.420 | 23.148 | 17.767 | 24.919 | 22.462 |
| 12 | 0.7961 | 14.058 | 30.443 | 20.655 | 23.385 | 30.119 |
| 12 | 0.7971 | 17.048 | 23.865 | 18.449 | 15.341 | 17.754 |
| 12 | 0.7981 | 17.157 | 17.559 | 16.171 | 6.736  | 19.723 |
| 12 | 0.7991 | 8.659  | 16.935 | 11.670 | 15.054 | 13.276 |
| 12 | 0.8001 | 8.372  | 11.824 | 6.724  | 21.797 | 16.837 |
| 12 | 0.8011 | 13.644 | 23.508 | 13.881 | 23.813 | 21.899 |
| 12 | 0.8021 | 10.316 | 15.615 | 11.466 | 19.228 | 22.481 |
| 12 | 0.8031 | 8.455  | 15.521 | 7.469  | 17.793 | 18.701 |
| 12 | 0.8041 | 10.441 | 17.165 | 9.947  | 24.290 | 14.418 |
| 12 | 0.8051 | 15.332 | 22.191 | 16.517 | 26.327 | 23.473 |
| 12 | 0.8061 | 11.754 | 20.248 | 14.564 | 22.395 | 14.572 |
| 12 | 0.8071 | 8.088  | 26.352 | 22.022 | 24.096 | 20.360 |
| 12 | 0.8081 | 16.061 | 12.407 | 13.333 | 14.136 | 17.959 |
| 12 | 0.8091 | 4.804  | 5.858  | 5.609  | 12.774 | 5.241  |
| 12 | 0.8101 | 11.266 | 22.862 | 10.197 | 24.683 | 15.848 |
| 12 | 0.8111 | 10.724 | 21.482 | 8.812  | 23.471 | 14.614 |
| 12 | 0.8121 | 16.378 | 11.445 | 21.486 | 16.942 | 8.726  |
| 12 | 0.8131 | 9.191  | 15.025 | 16.259 | 16.077 | 15.034 |
| 12 | 0.8141 | 11.905 | 17.839 | 11.216 | 24.481 | 12.045 |
| 12 | 0.8151 | 13.075 | 13.090 | 14.266 | 23.290 | 12.346 |
| 12 | 0.8161 | 13.374 | 8.595  | 16.858 | 20.425 | 11.982 |
| 12 | 0.8171 | 12.086 | 7.564  | 11.510 | 14.422 | 19.003 |
| 12 | 0.8181 | 11.743 | 20.131 | 11.067 | 14.121 | 10.412 |
| 12 | 0.8191 | 3.018  | 4.785  | 4.776  | 20.692 | 5.807  |
| 12 | 0.8201 | 8.341  | 7.964  | 9.292  | 16.045 | 7.465  |
| 12 | 0.8211 | 6.709  | 6.371  | 6.022  | 16.374 | 4.641  |
| 12 | 0.8221 | 11.419 | 21.163 | 13.202 | 27.783 | 7.263  |
| 12 | 0.8231 | 12.943 | 14.005 | 16.145 | 15.785 | 8.824  |
| 12 | 0.8241 | 2.514  | 5.755  | 8.253  | 11.163 | 3.936  |
| 12 | 0.8251 | 0.000  | 0.000  | 0.000  | 0.000  | 0.000  |
| 13 | 0.0014 | 0.000  | 0.000  | 0.000  | 0.000  | 0.000  |
| 13 | 0.0024 | 9.824  | 8.985  | 8.546  | 7.372  | 10.548 |
| 13 | 0.0034 | 12.348 | 7.686  | 6.001  | 19.472 | 10.842 |
| 13 | 0.0044 | 18.218 | 22.031 | 12.058 | 19.209 | 13.737 |
| 13 | 0.0054 | 14.476 | 12.169 | 9.047  | 11.115 | 11.601 |
| 13 | 0.0064 | 16.833 | 16.446 | 17.432 | 17.826 | 16.012 |
| 13 | 0.0074 | 15.500 | 19.416 | 13.108 | 18.347 | 16.593 |
| 13 | 0.0084 | 18.100 | 20.371 | 17.570 | 15.667 | 11.535 |
| 13 | 0.0094 | 18.472 | 19.592 | 15.052 | 18.849 | 10.432 |
| 13 | 0.0104 | 18.053 | 21.693 | 15.005 | 13.507 | 19.392 |
| 13 | 0.0114 | 22.011 | 30.156 | 24.710 | 22.406 | 17.072 |
| 13 | 0.0124 | 16.704 | 28.253 | 19.592 | 25.413 | 12.056 |
| 13 | 0.0134 | 16.725 | 20.087 | 15.762 | 19.664 | 10.130 |
| 13 | 0.0144 | 16.218 | 16.814 | 11.570 | 21.672 | 8.643  |
| 13 | 0.0154 | 12.435 | 17.110 | 9.404  | 18.806 | 16.744 |
| 13 | 0.0164 | 11.180 | 15.167 | 10.307 | 9.273  | 3.089  |

|    |        |        |        |        |        |        |
|----|--------|--------|--------|--------|--------|--------|
| 13 | 0.0174 | 7.883  | 12.347 | 9.502  | 8.853  | 10.263 |
| 13 | 0.0184 | 12.301 | 19.096 | 11.797 | 18.330 | 11.003 |
| 13 | 0.0194 | 10.821 | 13.791 | 9.058  | 16.590 | 11.504 |
| 13 | 0.0204 | 11.654 | 11.592 | 6.092  | 14.817 | 8.347  |
| 13 | 0.0214 | 11.551 | 11.460 | 6.080  | 14.765 | 8.198  |
| 13 | 0.0224 | 12.105 | 11.961 | 6.009  | 17.322 | 9.922  |
| 13 | 0.0234 | 13.710 | 11.891 | 6.627  | 11.994 | 24.587 |
| 13 | 0.0244 | 15.887 | 16.223 | 13.612 | 12.334 | 10.144 |
| 13 | 0.0254 | 22.495 | 30.521 | 18.015 | 22.287 | 6.035  |
| 13 | 0.0264 | 15.952 | 17.947 | 18.753 | 14.657 | 14.818 |
| 13 | 0.0274 | 9.904  | 13.249 | 7.346  | 17.741 | 13.399 |
| 13 | 0.0284 | 13.612 | 9.786  | 11.425 | 11.296 | 8.922  |
| 13 | 0.0294 | 11.186 | 14.059 | 10.977 | 4.825  | 10.092 |
| 13 | 0.0304 | 13.526 | 20.306 | 12.226 | 8.817  | 7.408  |
| 13 | 0.0314 | 15.727 | 20.710 | 12.822 | 14.642 | 10.751 |
| 13 | 0.0324 | 15.826 | 22.224 | 11.968 | 15.417 | 18.314 |
| 13 | 0.0334 | 19.840 | 22.428 | 14.566 | 16.423 | 15.630 |
| 13 | 0.0344 | 14.790 | 11.886 | 9.777  | 9.281  | 12.304 |
| 13 | 0.0354 | 11.804 | 14.832 | 10.826 | 13.375 | 16.295 |
| 13 | 0.0364 | 16.610 | 13.930 | 14.325 | 26.342 | 29.994 |
| 13 | 0.0374 | 24.362 | 24.026 | 22.407 | 14.135 | 14.623 |
| 13 | 0.0384 | 19.355 | 22.215 | 18.506 | 12.979 | 20.514 |
| 13 | 0.0394 | 16.414 | 13.233 | 10.242 | 8.838  | 8.360  |
| 13 | 0.0404 | 9.990  | 8.672  | 12.130 | 10.077 | 11.462 |
| 13 | 0.0414 | 14.204 | 11.670 | 14.329 | 12.031 | 7.195  |
| 13 | 0.0424 | 22.095 | 21.122 | 20.975 | 18.382 | 14.485 |
| 13 | 0.0434 | 9.069  | 9.821  | 8.516  | 12.715 | 17.795 |
| 13 | 0.0444 | 10.633 | 11.399 | 8.686  | 11.100 | 9.562  |
| 13 | 0.0454 | 10.169 | 10.640 | 8.249  | 11.619 | 9.794  |
| 13 | 0.0464 | 18.957 | 22.565 | 17.409 | 11.642 | 10.411 |
| 13 | 0.0474 | 12.011 | 13.002 | 8.528  | 13.746 | 14.814 |
| 13 | 0.0484 | 12.185 | 16.821 | 16.072 | 7.448  | 8.647  |
| 13 | 0.0494 | 14.745 | 16.704 | 15.173 | 10.652 | 16.865 |
| 13 | 0.0504 | 4.306  | 7.655  | 6.454  | 14.099 | 16.255 |
| 13 | 0.0514 | 3.580  | 5.700  | 10.945 | 17.194 | 16.589 |
| 13 | 0.0524 | 5.353  | 4.891  | 9.807  | 9.479  | 13.690 |
| 13 | 0.0534 | 17.180 | 15.480 | 11.817 | 12.980 | 20.763 |
| 13 | 0.0544 | 16.748 | 12.452 | 11.461 | 16.363 | 24.571 |
| 13 | 0.0554 | 9.452  | 10.792 | 13.072 | 6.352  | 12.880 |
| 13 | 0.0564 | 17.737 | 25.184 | 19.323 | 16.406 | 14.078 |
| 13 | 0.0574 | 14.143 | 10.942 | 14.948 | 15.925 | 10.242 |
| 13 | 0.0584 | 12.782 | 5.895  | 13.650 | 11.804 | 15.612 |
| 13 | 0.0594 | 14.566 | 11.561 | 13.132 | 6.370  | 17.119 |
| 13 | 0.0604 | 14.589 | 11.566 | 13.099 | 6.333  | 17.160 |
| 13 | 0.0614 | 14.016 | 23.575 | 23.896 | 20.832 | 20.243 |
| 13 | 0.0624 | 30.623 | 13.347 | 23.304 | 10.160 | 20.746 |
| 13 | 0.0634 | 20.877 | 17.058 | 22.616 | 13.165 | 11.561 |
| 13 | 0.0644 | 12.888 | 9.811  | 14.560 | 10.206 | 8.397  |
| 13 | 0.0654 | 4.111  | 10.017 | 7.789  | 10.893 | 10.492 |
| 13 | 0.0664 | 7.832  | 5.649  | 8.975  | 12.305 | 10.495 |

|    |        |        |        |        |        |        |
|----|--------|--------|--------|--------|--------|--------|
| 13 | 0.0674 | 13.284 | 18.655 | 16.350 | 15.091 | 9.774  |
| 13 | 0.0684 | 15.440 | 14.480 | 15.079 | 11.800 | 6.206  |
| 13 | 0.0694 | 10.625 | 10.086 | 7.900  | 11.406 | 16.204 |
| 13 | 0.0704 | 8.059  | 9.019  | 14.007 | 8.265  | 12.292 |
| 13 | 0.0714 | 10.292 | 8.584  | 10.950 | 8.075  | 2.885  |
| 13 | 0.0724 | 10.280 | 17.329 | 14.555 | 8.323  | 6.975  |
| 13 | 0.0734 | 12.138 | 18.276 | 15.355 | 6.854  | 4.811  |
| 13 | 0.0744 | 23.148 | 26.325 | 31.395 | 14.381 | 10.591 |
| 13 | 0.0754 | 23.089 | 26.233 | 31.339 | 14.325 | 10.535 |
| 13 | 0.0764 | 10.433 | 15.158 | 12.944 | 13.676 | 10.245 |
| 13 | 0.0774 | 8.920  | 15.149 | 11.244 | 12.237 | 12.400 |
| 13 | 0.0784 | 14.556 | 17.822 | 21.859 | 10.711 | 10.909 |
| 13 | 0.0794 | 8.366  | 9.875  | 10.080 | 10.388 | 9.236  |
| 13 | 0.0804 | 11.219 | 6.785  | 10.454 | 7.298  | 4.149  |
| 13 | 0.0814 | 9.647  | 13.123 | 9.989  | 15.321 | 8.740  |
| 13 | 0.0824 | 10.302 | 11.518 | 9.185  | 10.424 | 11.354 |
| 13 | 0.0834 | 9.715  | 14.639 | 11.432 | 11.680 | 8.322  |
| 13 | 0.0844 | 15.111 | 8.815  | 16.885 | 15.642 | 16.694 |
| 13 | 0.0854 | 7.739  | 9.608  | 12.552 | 12.541 | 9.130  |
| 13 | 0.0864 | 11.133 | 7.119  | 11.538 | 11.417 | 9.686  |
| 13 | 0.0874 | 16.318 | 25.911 | 21.715 | 16.698 | 9.066  |
| 13 | 0.0884 | 7.787  | 5.343  | 7.889  | 10.789 | 7.371  |
| 13 | 0.0894 | 15.850 | 10.956 | 15.474 | 8.876  | 6.534  |
| 13 | 0.0904 | 12.641 | 9.154  | 13.904 | 20.020 | 15.053 |
| 13 | 0.0914 | 7.443  | 7.944  | 11.174 | 18.289 | 12.197 |
| 13 | 0.0924 | 9.883  | 9.626  | 8.817  | 15.997 | 13.257 |
| 13 | 0.0934 | 12.261 | 23.229 | 14.301 | 13.990 | 11.612 |
| 13 | 0.0944 | 8.638  | 20.376 | 11.308 | 19.401 | 10.245 |
| 13 | 0.0954 | 7.476  | 7.762  | 7.086  | 12.137 | 4.671  |
| 13 | 0.0964 | 7.552  | 7.066  | 9.496  | 11.159 | 14.725 |
| 13 | 0.0974 | 11.412 | 12.469 | 11.693 | 13.611 | 12.483 |
| 13 | 0.0984 | 19.928 | 11.711 | 16.651 | 19.777 | 14.821 |
| 13 | 0.0994 | 19.904 | 12.265 | 20.831 | 14.808 | 8.136  |
| 13 | 0.1004 | 12.514 | 4.373  | 11.591 | 8.931  | 6.746  |
| 13 | 0.1014 | 15.261 | 5.778  | 10.198 | 12.487 | 14.681 |
| 13 | 0.1024 | 13.897 | 10.171 | 15.612 | 7.162  | 6.259  |
| 13 | 0.1034 | 15.130 | 13.472 | 14.854 | 9.513  | 11.211 |
| 13 | 0.1044 | 12.819 | 14.585 | 14.937 | 12.921 | 7.038  |
| 13 | 0.1054 | 14.034 | 13.496 | 12.874 | 5.896  | 4.287  |
| 13 | 0.1064 | 8.194  | 3.815  | 6.373  | 7.659  | 5.898  |
| 13 | 0.1074 | 12.212 | 14.969 | 13.414 | 6.331  | 5.112  |
| 13 | 0.1084 | 18.091 | 19.410 | 18.523 | 18.804 | 11.473 |
| 13 | 0.1094 | 14.302 | 21.111 | 19.131 | 15.780 | 11.496 |
| 13 | 0.1104 | 12.738 | 8.882  | 9.776  | 10.011 | 11.393 |
| 13 | 0.1114 | 12.324 | 9.174  | 7.197  | 21.193 | 19.127 |
| 13 | 0.1124 | 14.377 | 13.850 | 13.351 | 9.634  | 9.116  |
| 13 | 0.1134 | 15.958 | 19.845 | 12.663 | 9.755  | 17.354 |
| 13 | 0.1144 | 27.704 | 24.802 | 35.532 | 14.173 | 12.158 |
| 13 | 0.1154 | 25.552 | 20.586 | 27.435 | 13.525 | 10.967 |
| 13 | 0.1164 | 11.793 | 13.723 | 9.639  | 17.159 | 3.643  |

|    |        |        |        |        |        |        |
|----|--------|--------|--------|--------|--------|--------|
| 13 | 0.1174 | 20.220 | 20.039 | 27.332 | 7.922  | 12.210 |
| 13 | 0.1184 | 17.601 | 26.394 | 22.923 | 16.110 | 8.738  |
| 13 | 0.1194 | 15.708 | 11.555 | 16.990 | 14.952 | 6.090  |
| 13 | 0.1204 | 20.465 | 21.197 | 23.956 | 7.588  | 7.963  |
| 13 | 0.1214 | 18.696 | 21.778 | 21.699 | 7.440  | 17.026 |
| 13 | 0.1224 | 28.563 | 26.486 | 24.016 | 7.440  | 15.217 |
| 13 | 0.1234 | 18.042 | 17.576 | 11.834 | 8.612  | 13.731 |
| 13 | 0.1244 | 17.389 | 15.617 | 11.304 | 5.539  | 21.232 |
| 13 | 0.1254 | 19.932 | 20.622 | 22.332 | 10.796 | 18.987 |
| 13 | 0.1264 | 23.504 | 19.297 | 32.592 | 9.190  | 18.005 |
| 13 | 0.1274 | 8.183  | 2.673  | 8.356  | 5.447  | 6.172  |
| 13 | 0.1284 | 5.265  | 7.321  | 8.078  | 5.344  | 17.998 |
| 13 | 0.1294 | 9.814  | 4.827  | 7.001  | 2.470  | 11.541 |
| 13 | 0.1304 | 31.695 | 20.875 | 25.703 | 4.609  | 15.766 |
| 13 | 0.1314 | 36.526 | 26.932 | 39.574 | 8.061  | 9.685  |
| 13 | 0.1324 | 25.378 | 28.145 | 35.238 | 8.116  | 9.298  |
| 13 | 0.1334 | 15.110 | 14.571 | 15.172 | 9.263  | 14.225 |
| 13 | 0.1344 | 16.988 | 12.825 | 12.764 | 8.098  | 9.951  |
| 13 | 0.1354 | 4.724  | 4.975  | 1.782  | 8.821  | 7.473  |
| 13 | 0.1364 | 8.161  | 6.697  | 7.023  | 16.778 | 10.824 |
| 13 | 0.1374 | 11.587 | 6.101  | 15.149 | 12.061 | 11.357 |
| 13 | 0.1384 | 8.647  | 4.950  | 9.857  | 17.715 | 11.678 |
| 13 | 0.1394 | 8.714  | 4.967  | 9.861  | 17.737 | 11.743 |
| 13 | 0.1404 | 9.324  | 10.275 | 9.259  | 18.393 | 12.955 |
| 13 | 0.1414 | 9.389  | 8.240  | 7.907  | 9.117  | 11.007 |
| 13 | 0.1424 | 9.432  | 8.224  | 7.873  | 9.082  | 11.141 |
| 13 | 0.1434 | 8.373  | 9.432  | 10.893 | 14.829 | 16.018 |
| 13 | 0.1444 | 8.423  | 9.470  | 10.951 | 14.918 | 16.022 |
| 13 | 0.1454 | 7.719  | 8.632  | 5.864  | 21.888 | 11.508 |
| 13 | 0.1464 | 7.742  | 8.631  | 5.895  | 21.952 | 11.488 |
| 13 | 0.1474 | 11.885 | 7.354  | 8.993  | 13.986 | 13.998 |
| 13 | 0.1484 | 18.863 | 14.129 | 19.221 | 8.085  | 16.231 |
| 13 | 0.1494 | 17.213 | 21.454 | 25.697 | 16.555 | 17.494 |
| 13 | 0.1504 | 11.910 | 14.594 | 8.887  | 19.272 | 10.502 |
| 13 | 0.1514 | 15.979 | 9.374  | 11.036 | 10.985 | 16.378 |
| 13 | 0.1524 | 13.183 | 17.582 | 15.157 | 11.370 | 9.022  |
| 13 | 0.1534 | 16.665 | 19.408 | 18.147 | 10.151 | 7.059  |
| 13 | 0.1544 | 27.924 | 28.035 | 29.189 | 12.655 | 8.691  |
| 13 | 0.1554 | 10.889 | 12.432 | 10.413 | 9.591  | 5.439  |
| 13 | 0.1564 | 4.410  | 5.659  | 4.984  | 3.436  | 5.068  |
| 13 | 0.1574 | 7.664  | 7.158  | 6.749  | 5.671  | 6.068  |
| 13 | 0.1584 | 16.866 | 18.934 | 17.004 | 11.084 | 15.143 |
| 13 | 0.1594 | 15.267 | 8.685  | 12.618 | 11.323 | 11.252 |
| 13 | 0.1604 | 12.919 | 15.266 | 13.827 | 18.699 | 9.596  |
| 13 | 0.1614 | 24.971 | 22.810 | 23.750 | 11.733 | 24.168 |
| 13 | 0.1624 | 8.916  | 10.983 | 7.506  | 6.780  | 9.340  |
| 13 | 0.1634 | 13.644 | 19.007 | 14.188 | 8.606  | 5.188  |
| 13 | 0.1644 | 13.574 | 18.943 | 14.090 | 8.643  | 5.183  |
| 13 | 0.1654 | 13.521 | 18.893 | 14.009 | 8.681  | 5.178  |
| 13 | 0.1664 | 17.121 | 9.395  | 15.283 | 14.418 | 15.900 |

|    |        |        |        |        |        |        |
|----|--------|--------|--------|--------|--------|--------|
| 13 | 0.1674 | 21.553 | 13.504 | 14.377 | 14.492 | 35.459 |
| 13 | 0.1684 | 20.362 | 5.464  | 10.001 | 13.187 | 26.853 |
| 13 | 0.1694 | 7.860  | 8.954  | 7.680  | 6.475  | 18.675 |
| 13 | 0.1704 | 14.208 | 9.831  | 11.008 | 20.661 | 14.295 |
| 13 | 0.1714 | 15.003 | 9.533  | 13.870 | 9.937  | 13.276 |
| 13 | 0.1724 | 16.097 | 12.719 | 15.181 | 20.553 | 10.991 |
| 13 | 0.1734 | 18.736 | 13.293 | 17.779 | 10.292 | 21.861 |
| 13 | 0.1744 | 19.344 | 16.941 | 14.183 | 11.320 | 27.166 |
| 13 | 0.1754 | 9.051  | 15.060 | 12.108 | 20.580 | 7.262  |
| 13 | 0.1764 | 16.343 | 13.560 | 18.567 | 14.820 | 13.955 |
| 13 | 0.1774 | 9.942  | 10.618 | 7.220  | 14.841 | 17.891 |
| 13 | 0.1784 | 13.638 | 9.605  | 8.602  | 13.291 | 27.097 |
| 13 | 0.1794 | 9.582  | 12.468 | 8.284  | 32.734 | 20.557 |
| 13 | 0.1804 | 16.398 | 16.190 | 16.981 | 14.445 | 20.354 |
| 13 | 0.1814 | 12.689 | 10.988 | 14.603 | 19.209 | 21.508 |
| 13 | 0.1824 | 15.942 | 18.731 | 16.418 | 27.117 | 21.891 |
| 13 | 0.1834 | 14.897 | 9.182  | 13.170 | 11.616 | 15.050 |
| 13 | 0.1844 | 8.952  | 15.294 | 9.663  | 14.115 | 5.822  |
| 13 | 0.1854 | 25.555 | 17.443 | 25.691 | 11.846 | 10.807 |
| 13 | 0.1864 | 20.865 | 17.046 | 16.363 | 15.241 | 18.476 |
| 13 | 0.1874 | 19.611 | 17.019 | 16.369 | 19.104 | 18.438 |
| 13 | 0.1884 | 23.687 | 17.514 | 17.337 | 31.711 | 16.481 |
| 13 | 0.1894 | 14.035 | 12.049 | 13.982 | 22.200 | 20.056 |
| 13 | 0.1904 | 12.883 | 8.812  | 12.551 | 18.475 | 16.247 |
| 13 | 0.1914 | 12.475 | 19.739 | 11.832 | 31.462 | 18.403 |
| 13 | 0.1924 | 10.221 | 20.460 | 13.999 | 32.004 | 14.864 |
| 13 | 0.1934 | 15.854 | 11.525 | 16.615 | 40.060 | 26.461 |
| 13 | 0.1944 | 15.541 | 9.587  | 18.494 | 23.822 | 30.675 |
| 13 | 0.1954 | 6.100  | 10.687 | 10.398 | 19.018 | 29.463 |
| 13 | 0.1964 | 17.140 | 13.859 | 19.370 | 14.708 | 19.574 |
| 13 | 0.1974 | 14.446 | 16.015 | 21.558 | 20.001 | 20.112 |
| 13 | 0.1984 | 17.626 | 22.485 | 19.955 | 29.063 | 31.963 |
| 13 | 0.1994 | 9.824  | 21.281 | 11.795 | 31.881 | 23.394 |
| 13 | 0.2004 | 11.299 | 8.236  | 15.854 | 21.313 | 17.651 |
| 13 | 0.2014 | 8.296  | 11.889 | 11.388 | 18.401 | 26.097 |
| 13 | 0.2024 | 14.896 | 18.962 | 19.034 | 28.825 | 14.254 |
| 13 | 0.2034 | 10.818 | 16.011 | 11.263 | 23.626 | 12.200 |
| 13 | 0.2044 | 11.747 | 13.633 | 11.818 | 11.374 | 14.837 |
| 13 | 0.2054 | 2.233  | 6.297  | 2.640  | 22.934 | 14.649 |
| 13 | 0.2064 | 2.787  | 6.900  | 4.277  | 26.434 | 22.194 |
| 13 | 0.2074 | 10.583 | 6.055  | 4.788  | 26.568 | 28.708 |
| 13 | 0.2084 | 10.447 | 11.162 | 10.948 | 18.205 | 12.058 |
| 13 | 0.2094 | 7.937  | 13.976 | 10.401 | 17.394 | 5.721  |
| 13 | 0.2104 | 15.049 | 15.474 | 13.522 | 23.453 | 13.773 |
| 13 | 0.2114 | 20.007 | 18.089 | 16.022 | 25.689 | 18.451 |
| 13 | 0.2124 | 21.949 | 20.144 | 26.628 | 12.709 | 14.961 |
| 13 | 0.2134 | 25.517 | 19.685 | 26.432 | 15.374 | 15.769 |
| 13 | 0.2144 | 15.512 | 18.902 | 19.805 | 22.685 | 22.679 |
| 13 | 0.2154 | 8.947  | 6.879  | 6.625  | 17.134 | 16.372 |
| 13 | 0.2164 | 5.719  | 4.922  | 5.082  | 11.672 | 12.909 |

|    |        |        |        |        |        |        |
|----|--------|--------|--------|--------|--------|--------|
| 13 | 0.2174 | 7.080  | 10.568 | 9.554  | 3.018  | 9.491  |
| 13 | 0.2184 | 11.620 | 12.929 | 11.167 | 9.329  | 12.463 |
| 13 | 0.2194 | 22.577 | 20.745 | 17.995 | 15.882 | 14.314 |
| 13 | 0.2204 | 21.042 | 20.516 | 18.100 | 32.673 | 25.265 |
| 13 | 0.2214 | 21.107 | 20.510 | 18.119 | 32.544 | 25.134 |
| 13 | 0.2224 | 12.779 | 11.630 | 9.964  | 25.157 | 11.982 |
| 13 | 0.2234 | 17.767 | 15.202 | 20.064 | 26.279 | 16.822 |
| 13 | 0.2244 | 19.005 | 12.812 | 19.644 | 16.947 | 10.877 |
| 13 | 0.2254 | 12.728 | 14.462 | 16.781 | 23.596 | 19.507 |
| 13 | 0.2264 | 13.513 | 16.730 | 18.477 | 14.580 | 14.753 |
| 13 | 0.2274 | 13.554 | 14.304 | 16.833 | 10.660 | 9.756  |
| 13 | 0.2284 | 14.870 | 18.119 | 21.720 | 11.187 | 13.588 |
| 13 | 0.2294 | 8.705  | 11.218 | 14.084 | 14.925 | 13.324 |
| 13 | 0.2304 | 21.352 | 16.533 | 22.343 | 16.628 | 14.469 |
| 13 | 0.2314 | 27.025 | 16.793 | 22.608 | 16.453 | 26.685 |
| 13 | 0.2324 | 14.977 | 14.129 | 13.552 | 26.208 | 22.561 |
| 13 | 0.2334 | 10.030 | 16.644 | 19.102 | 16.247 | 16.709 |
| 13 | 0.2344 | 17.613 | 10.167 | 15.726 | 3.946  | 8.331  |
| 13 | 0.2354 | 13.622 | 10.995 | 11.558 | 16.644 | 24.234 |
| 13 | 0.2364 | 12.843 | 10.088 | 10.123 | 18.352 | 16.608 |
| 13 | 0.2374 | 25.469 | 21.027 | 23.899 | 24.310 | 14.364 |
| 13 | 0.2384 | 11.663 | 8.165  | 11.397 | 17.720 | 20.458 |
| 13 | 0.2394 | 14.646 | 13.514 | 13.522 | 17.722 | 10.547 |
| 13 | 0.2404 | 14.680 | 15.898 | 14.659 | 24.131 | 11.088 |
| 13 | 0.2414 | 15.836 | 11.731 | 15.792 | 25.402 | 19.096 |
| 13 | 0.2424 | 14.118 | 8.499  | 14.564 | 25.451 | 18.707 |
| 13 | 0.2434 | 9.289  | 3.902  | 11.567 | 10.771 | 10.869 |
| 13 | 0.2444 | 13.289 | 7.269  | 12.739 | 8.820  | 12.745 |
| 13 | 0.2454 | 14.143 | 12.684 | 11.310 | 14.138 | 7.254  |
| 13 | 0.2464 | 10.837 | 9.929  | 11.130 | 10.268 | 8.666  |
| 13 | 0.2474 | 11.878 | 10.933 | 13.228 | 11.259 | 8.359  |
| 13 | 0.2484 | 8.303  | 9.157  | 3.892  | 20.505 | 7.279  |
| 13 | 0.2494 | 15.122 | 15.861 | 12.222 | 30.461 | 24.002 |
| 13 | 0.2504 | 12.111 | 12.622 | 12.485 | 19.970 | 11.625 |
| 13 | 0.2514 | 2.296  | 2.843  | 4.080  | 15.587 | 8.537  |
| 13 | 0.2524 | 4.917  | 6.554  | 6.575  | 19.368 | 14.284 |
| 13 | 0.2534 | 10.166 | 8.506  | 10.485 | 15.231 | 17.884 |
| 13 | 0.2544 | 8.826  | 10.274 | 7.140  | 16.429 | 14.567 |
| 13 | 0.2554 | 5.782  | 7.839  | 7.398  | 24.919 | 8.922  |
| 13 | 0.2564 | 4.611  | 6.439  | 6.591  | 10.338 | 8.928  |
| 13 | 0.2574 | 12.399 | 11.544 | 12.399 | 22.085 | 15.954 |
| 13 | 0.2584 | 19.594 | 16.692 | 21.107 | 21.450 | 13.316 |
| 13 | 0.2594 | 19.569 | 14.354 | 13.380 | 19.280 | 16.660 |
| 13 | 0.2604 | 11.521 | 6.602  | 12.188 | 23.126 | 15.908 |
| 13 | 0.2614 | 8.974  | 8.493  | 9.223  | 18.393 | 23.911 |
| 13 | 0.2624 | 12.271 | 3.884  | 10.449 | 12.392 | 13.409 |
| 13 | 0.2634 | 16.041 | 9.948  | 14.483 | 11.918 | 12.943 |
| 13 | 0.2644 | 7.460  | 4.117  | 7.389  | 13.068 | 9.432  |
| 13 | 0.2654 | 13.368 | 10.470 | 12.187 | 22.326 | 20.506 |
| 13 | 0.2664 | 11.108 | 12.589 | 11.714 | 26.330 | 10.048 |



|    |        |        |        |        |        |        |
|----|--------|--------|--------|--------|--------|--------|
| 13 | 0.2674 | 9.025  | 8.302  | 9.790  | 22.520 | 11.623 |
| 13 | 0.2684 | 4.841  | 12.824 | 6.708  | 21.179 | 11.239 |
| 13 | 0.2694 | 5.098  | 11.831 | 5.044  | 23.299 | 15.764 |
| 13 | 0.2704 | 13.122 | 15.434 | 12.635 | 24.057 | 17.499 |
| 13 | 0.2714 | 9.471  | 15.318 | 11.923 | 28.994 | 21.360 |
| 13 | 0.2724 | 13.132 | 11.293 | 10.114 | 32.389 | 13.490 |
| 13 | 0.2734 | 8.593  | 9.190  | 5.910  | 25.072 | 13.712 |
| 13 | 0.2744 | 6.886  | 7.501  | 6.056  | 21.165 | 15.088 |
| 13 | 0.2754 | 7.760  | 5.886  | 7.183  | 11.024 | 16.347 |
| 13 | 0.2764 | 9.543  | 11.364 | 9.832  | 16.112 | 5.393  |
| 13 | 0.2774 | 11.574 | 13.688 | 14.595 | 12.996 | 11.676 |
| 13 | 0.2784 | 5.013  | 8.039  | 5.399  | 14.901 | 11.864 |
| 13 | 0.2794 | 6.142  | 8.722  | 6.051  | 16.373 | 10.543 |
| 13 | 0.2804 | 11.445 | 11.423 | 13.286 | 18.229 | 24.027 |
| 13 | 0.2814 | 1.691  | 6.030  | 4.205  | 14.006 | 9.440  |
| 13 | 0.2824 | 1.255  | 8.454  | 4.542  | 13.243 | 5.216  |
| 13 | 0.2834 | 11.061 | 21.734 | 16.172 | 20.356 | 6.737  |
| 13 | 0.2844 | 13.619 | 26.648 | 16.326 | 23.503 | 10.085 |
| 13 | 0.2854 | 10.112 | 14.393 | 9.749  | 18.730 | 6.566  |
| 13 | 0.2864 | 17.823 | 18.205 | 25.424 | 26.122 | 7.224  |
| 13 | 0.2874 | 18.342 | 14.233 | 23.092 | 17.308 | 9.576  |
| 13 | 0.2884 | 7.320  | 9.083  | 9.562  | 19.682 | 4.670  |
| 13 | 0.2894 | 7.717  | 11.747 | 11.928 | 29.959 | 3.553  |
| 13 | 0.2904 | 4.688  | 10.939 | 4.737  | 19.771 | 6.946  |
| 13 | 0.2914 | 6.819  | 4.730  | 8.159  | 20.131 | 8.336  |
| 13 | 0.2924 | 8.307  | 5.197  | 9.062  | 18.474 | 7.159  |
| 13 | 0.2934 | 7.758  | 6.001  | 7.110  | 14.954 | 11.594 |
| 13 | 0.2944 | 7.436  | 3.337  | 5.014  | 8.464  | 9.754  |
| 13 | 0.2954 | 9.277  | 9.835  | 11.339 | 13.109 | 10.833 |
| 13 | 0.2964 | 9.770  | 15.952 | 15.743 | 18.881 | 7.868  |
| 13 | 0.2974 | 19.039 | 16.620 | 22.491 | 11.856 | 12.345 |
| 13 | 0.2984 | 17.340 | 19.818 | 13.848 | 25.138 | 13.940 |
| 13 | 0.2994 | 11.774 | 13.654 | 11.951 | 24.580 | 11.763 |
| 13 | 0.3004 | 9.249  | 14.272 | 10.957 | 25.374 | 11.011 |
| 13 | 0.3014 | 10.515 | 18.087 | 13.745 | 33.208 | 12.038 |
| 13 | 0.3024 | 7.227  | 13.333 | 7.865  | 27.626 | 15.630 |
| 13 | 0.3034 | 5.345  | 7.223  | 4.227  | 18.708 | 5.266  |
| 13 | 0.3044 | 7.258  | 11.129 | 8.782  | 12.329 | 7.452  |
| 13 | 0.3054 | 2.979  | 6.693  | 3.266  | 12.861 | 2.871  |
| 13 | 0.3064 | 3.503  | 3.120  | 3.415  | 6.817  | 2.491  |
| 13 | 0.3074 | 1.845  | 1.282  | 3.580  | 1.957  | 2.230  |
| 13 | 0.3084 | 9.951  | 10.251 | 6.235  | 21.631 | 13.232 |
| 13 | 0.3094 | 8.015  | 7.247  | 5.928  | 12.457 | 2.205  |
| 13 | 0.3104 | 10.811 | 3.466  | 6.503  | 17.162 | 16.530 |
| 13 | 0.3114 | 6.958  | 14.607 | 10.565 | 37.626 | 18.325 |
| 13 | 0.3124 | 12.153 | 14.633 | 13.456 | 37.151 | 17.547 |
| 13 | 0.3134 | 9.863  | 9.521  | 10.616 | 20.272 | 9.989  |
| 13 | 0.3144 | 6.535  | 7.486  | 6.799  | 17.291 | 11.186 |
| 13 | 0.3154 | 10.304 | 8.966  | 8.545  | 30.715 | 11.114 |
| 13 | 0.3164 | 8.702  | 8.327  | 10.308 | 18.537 | 6.148  |

|    |        |        |        |        |        |        |
|----|--------|--------|--------|--------|--------|--------|
| 13 | 0.3174 | 6.965  | 6.229  | 10.102 | 16.497 | 10.490 |
| 13 | 0.3184 | 17.834 | 16.435 | 19.475 | 12.908 | 13.028 |
| 13 | 0.3194 | 12.780 | 12.846 | 10.964 | 17.611 | 9.331  |
| 13 | 0.3204 | 21.693 | 13.653 | 19.708 | 12.870 | 14.820 |
| 13 | 0.3214 | 23.705 | 20.592 | 24.115 | 23.643 | 14.188 |
| 13 | 0.3224 | 18.462 | 17.763 | 12.397 | 27.710 | 11.045 |
| 13 | 0.3234 | 14.122 | 11.569 | 11.600 | 24.666 | 9.348  |
| 13 | 0.3244 | 20.159 | 13.118 | 18.063 | 20.180 | 15.432 |
| 13 | 0.3254 | 15.400 | 11.813 | 9.077  | 7.582  | 6.550  |
| 13 | 0.3264 | 9.824  | 7.094  | 9.154  | 9.093  | 4.474  |
| 13 | 0.3274 | 11.541 | 16.212 | 15.268 | 8.458  | 9.855  |
| 13 | 0.3284 | 18.185 | 20.761 | 21.962 | 14.332 | 8.928  |
| 13 | 0.3294 | 18.190 | 20.793 | 22.051 | 14.345 | 8.938  |
| 13 | 0.3304 | 17.062 | 16.988 | 15.828 | 21.968 | 16.480 |
| 13 | 0.3314 | 15.453 | 14.775 | 16.895 | 25.248 | 9.079  |
| 13 | 0.3324 | 13.182 | 11.538 | 14.368 | 14.436 | 11.028 |
| 13 | 0.3334 | 14.945 | 14.047 | 17.493 | 11.447 | 6.456  |
| 13 | 0.3344 | 16.849 | 12.356 | 23.927 | 13.746 | 11.269 |
| 13 | 0.3354 | 14.007 | 12.756 | 14.443 | 12.905 | 14.384 |
| 13 | 0.3364 | 7.424  | 7.080  | 12.556 | 13.374 | 13.052 |
| 13 | 0.3374 | 10.212 | 13.478 | 12.365 | 22.815 | 11.463 |
| 13 | 0.3384 | 12.636 | 10.991 | 13.547 | 19.488 | 12.575 |
| 13 | 0.3394 | 19.606 | 19.476 | 20.241 | 12.333 | 10.782 |
| 13 | 0.3404 | 17.091 | 14.600 | 29.108 | 17.447 | 11.974 |
| 13 | 0.3414 | 17.104 | 14.608 | 29.118 | 17.462 | 11.972 |
| 13 | 0.3424 | 14.310 | 7.477  | 17.480 | 16.045 | 11.224 |
| 13 | 0.3434 | 8.936  | 13.493 | 12.845 | 19.900 | 9.802  |
| 13 | 0.3444 | 8.885  | 13.634 | 12.667 | 20.124 | 9.701  |
| 13 | 0.3454 | 11.546 | 12.929 | 12.225 | 17.817 | 12.725 |
| 13 | 0.3464 | 8.817  | 6.185  | 11.270 | 14.617 | 9.666  |
| 13 | 0.3474 | 13.408 | 7.588  | 15.370 | 21.406 | 9.765  |
| 13 | 0.3484 | 31.481 | 13.274 | 27.477 | 21.125 | 11.712 |
| 13 | 0.3494 | 22.144 | 17.546 | 26.102 | 11.653 | 10.421 |
| 13 | 0.3504 | 16.818 | 13.073 | 26.033 | 12.799 | 12.631 |
| 13 | 0.3514 | 16.664 | 12.915 | 25.858 | 12.758 | 12.697 |
| 13 | 0.3524 | 12.246 | 17.598 | 11.027 | 11.562 | 16.597 |
| 13 | 0.3534 | 12.709 | 7.610  | 13.399 | 14.988 | 27.108 |
| 13 | 0.3544 | 12.713 | 7.614  | 13.401 | 14.968 | 27.083 |
| 13 | 0.3554 | 16.999 | 9.312  | 22.196 | 31.140 | 9.691  |
| 13 | 0.3564 | 21.770 | 10.029 | 22.174 | 21.236 | 19.013 |
| 13 | 0.3574 | 11.289 | 8.168  | 10.950 | 9.530  | 11.646 |
| 13 | 0.3584 | 8.758  | 8.256  | 10.952 | 19.957 | 13.856 |
| 13 | 0.3594 | 8.740  | 8.428  | 11.049 | 20.098 | 13.859 |
| 13 | 0.3604 | 9.271  | 5.766  | 6.026  | 16.803 | 6.821  |
| 13 | 0.3614 | 13.417 | 9.378  | 10.691 | 15.268 | 22.271 |
| 13 | 0.3624 | 13.072 | 8.371  | 9.569  | 19.243 | 32.762 |
| 13 | 0.3634 | 17.300 | 13.731 | 18.913 | 33.617 | 20.513 |
| 13 | 0.3644 | 19.048 | 11.936 | 16.150 | 22.328 | 16.826 |
| 13 | 0.3654 | 20.066 | 10.202 | 20.474 | 31.928 | 15.704 |
| 13 | 0.3664 | 20.992 | 11.541 | 18.272 | 20.077 | 10.362 |

|    |        |        |        |        |        |        |
|----|--------|--------|--------|--------|--------|--------|
| 13 | 0.3674 | 13.973 | 4.287  | 13.094 | 19.154 | 11.090 |
| 13 | 0.3684 | 13.810 | 8.382  | 12.006 | 28.233 | 20.008 |
| 13 | 0.3694 | 23.306 | 8.853  | 19.988 | 31.372 | 42.935 |
| 13 | 0.3704 | 12.402 | 7.833  | 14.565 | 22.459 | 32.925 |
| 13 | 0.3714 | 10.561 | 8.464  | 16.344 | 17.361 | 10.327 |
| 13 | 0.3724 | 13.207 | 8.457  | 17.974 | 22.753 | 15.273 |
| 13 | 0.3734 | 10.527 | 11.793 | 14.482 | 14.627 | 24.911 |
| 13 | 0.3744 | 21.630 | 18.575 | 21.877 | 14.043 | 6.363  |
| 13 | 0.3754 | 22.570 | 9.883  | 15.369 | 26.331 | 31.798 |
| 13 | 0.3764 | 16.890 | 17.462 | 13.660 | 23.854 | 14.644 |
| 13 | 0.3774 | 15.030 | 10.551 | 15.774 | 15.774 | 22.145 |
| 13 | 0.3784 | 21.097 | 10.051 | 16.371 | 34.527 | 31.303 |
| 13 | 0.3794 | 24.416 | 13.100 | 23.444 | 16.382 | 15.586 |
| 13 | 0.3804 | 22.851 | 18.430 | 25.304 | 19.038 | 14.658 |
| 13 | 0.3814 | 12.915 | 11.604 | 18.007 | 16.680 | 12.710 |
| 13 | 0.3824 | 17.426 | 12.009 | 18.652 | 22.612 | 17.538 |
| 13 | 0.3834 | 17.216 | 15.936 | 19.452 | 19.558 | 12.638 |
| 13 | 0.3844 | 13.769 | 13.625 | 15.940 | 20.270 | 16.248 |
| 13 | 0.3854 | 13.444 | 12.368 | 16.280 | 25.173 | 16.482 |
| 13 | 0.3864 | 15.561 | 6.361  | 13.968 | 14.995 | 14.513 |
| 13 | 0.3874 | 7.508  | 10.282 | 11.558 | 18.332 | 18.585 |
| 13 | 0.3884 | 10.577 | 11.056 | 18.015 | 19.547 | 20.761 |
| 13 | 0.3894 | 23.362 | 10.943 | 27.981 | 18.431 | 8.677  |
| 13 | 0.3904 | 18.914 | 14.557 | 15.811 | 9.477  | 10.884 |
| 13 | 0.3914 | 6.515  | 3.355  | 6.141  | 6.063  | 4.902  |
| 13 | 0.3924 | 24.142 | 14.577 | 20.459 | 22.293 | 4.407  |
| 13 | 0.3934 | 23.392 | 14.733 | 11.408 | 34.579 | 14.247 |
| 13 | 0.3944 | 7.488  | 8.068  | 6.066  | 28.922 | 16.948 |
| 13 | 0.3954 | 11.361 | 6.732  | 8.400  | 27.487 | 29.169 |
| 13 | 0.3964 | 11.319 | 8.662  | 11.252 | 16.252 | 19.072 |
| 13 | 0.3974 | 7.932  | 6.138  | 5.224  | 19.741 | 18.165 |
| 13 | 0.3984 | 16.496 | 10.161 | 14.859 | 14.937 | 22.867 |
| 13 | 0.3994 | 17.391 | 7.833  | 12.148 | 22.779 | 30.678 |
| 13 | 0.4004 | 15.402 | 6.944  | 15.220 | 15.009 | 24.345 |
| 13 | 0.4014 | 14.091 | 9.900  | 13.842 | 26.295 | 22.818 |
| 13 | 0.4024 | 13.519 | 8.899  | 16.320 | 8.559  | 23.807 |
| 13 | 0.4034 | 16.129 | 8.204  | 9.853  | 26.763 | 17.240 |
| 13 | 0.4044 | 12.164 | 7.157  | 6.569  | 19.908 | 15.219 |
| 13 | 0.4054 | 2.609  | 7.429  | 3.905  | 17.927 | 12.461 |
| 13 | 0.4064 | 3.096  | 10.560 | 3.027  | 21.704 | 7.701  |
| 13 | 0.4074 | 12.394 | 9.852  | 8.552  | 5.096  | 16.900 |
| 13 | 0.4084 | 10.503 | 6.306  | 6.662  | 24.772 | 21.872 |
| 13 | 0.4094 | 11.191 | 6.222  | 12.141 | 24.046 | 20.950 |
| 13 | 0.4104 | 17.222 | 3.443  | 12.203 | 18.544 | 23.497 |
| 13 | 0.4114 | 6.256  | 1.369  | 5.148  | 7.470  | 11.964 |
| 13 | 0.4124 | 10.847 | 7.339  | 9.783  | 22.602 | 16.503 |
| 13 | 0.4134 | 9.892  | 11.549 | 10.301 | 13.707 | 15.090 |
| 13 | 0.4144 | 2.677  | 6.617  | 5.624  | 8.437  | 11.588 |
| 13 | 0.4154 | 14.419 | 8.144  | 10.607 | 24.109 | 17.018 |
| 13 | 0.4164 | 28.584 | 18.821 | 22.906 | 29.814 | 18.139 |

|    |        |        |        |        |        |        |
|----|--------|--------|--------|--------|--------|--------|
| 13 | 0.4174 | 12.030 | 9.216  | 12.842 | 11.325 | 14.504 |
| 13 | 0.4184 | 16.498 | 13.312 | 17.214 | 14.159 | 15.508 |
| 13 | 0.4194 | 9.188  | 10.746 | 9.259  | 7.331  | 6.856  |
| 13 | 0.4204 | 7.750  | 8.111  | 7.094  | 22.964 | 20.082 |
| 13 | 0.4214 | 21.996 | 6.628  | 13.461 | 15.759 | 19.960 |
| 13 | 0.4224 | 8.656  | 12.013 | 9.412  | 12.758 | 23.465 |
| 13 | 0.4234 | 23.783 | 16.725 | 16.386 | 25.302 | 34.277 |
| 13 | 0.4244 | 10.052 | 7.244  | 8.784  | 17.712 | 23.092 |
| 13 | 0.4254 | 7.509  | 4.347  | 7.975  | 16.585 | 21.014 |
| 13 | 0.4264 | 11.985 | 10.089 | 12.109 | 9.904  | 25.477 |
| 13 | 0.4274 | 4.318  | 1.678  | 4.782  | 6.640  | 19.520 |
| 13 | 0.4284 | 6.666  | 6.239  | 7.870  | 6.892  | 15.607 |
| 13 | 0.4294 | 15.028 | 12.582 | 10.071 | 18.845 | 24.519 |
| 13 | 0.4304 | 30.577 | 13.714 | 16.459 | 15.558 | 17.684 |
| 13 | 0.4314 | 23.923 | 11.733 | 13.716 | 13.904 | 17.816 |
| 13 | 0.4324 | 8.243  | 7.079  | 8.255  | 7.127  | 16.603 |
| 13 | 0.4334 | 12.820 | 9.308  | 13.746 | 13.411 | 19.829 |
| 13 | 0.4344 | 19.992 | 12.757 | 14.088 | 10.265 | 21.350 |
| 13 | 0.4354 | 10.495 | 9.485  | 8.411  | 19.422 | 29.144 |
| 13 | 0.4364 | 14.411 | 6.612  | 9.228  | 28.850 | 22.618 |
| 13 | 0.4374 | 23.419 | 8.805  | 12.240 | 22.752 | 30.044 |
| 13 | 0.4384 | 23.463 | 16.660 | 19.989 | 15.222 | 15.314 |
| 13 | 0.4394 | 19.269 | 20.112 | 20.083 | 11.367 | 6.361  |
| 13 | 0.4404 | 19.937 | 13.584 | 14.185 | 11.801 | 6.430  |
| 13 | 0.4414 | 12.206 | 13.985 | 11.393 | 13.854 | 1.957  |
| 13 | 0.4424 | 16.063 | 7.932  | 10.070 | 6.817  | 11.701 |
| 13 | 0.4434 | 13.455 | 5.124  | 10.584 | 10.921 | 14.024 |
| 13 | 0.4444 | 18.166 | 9.045  | 15.454 | 9.435  | 8.333  |
| 13 | 0.4454 | 11.847 | 9.493  | 13.817 | 6.888  | 6.427  |
| 13 | 0.4464 | 7.119  | 2.001  | 5.067  | 4.843  | 3.708  |
| 13 | 0.4474 | 3.734  | 2.807  | 0.838  | 11.068 | 5.568  |
| 13 | 0.4484 | 9.847  | 6.486  | 3.804  | 7.673  | 5.889  |
| 13 | 0.4494 | 7.834  | 4.468  | 3.313  | 4.514  | 5.669  |
| 13 | 0.4504 | 3.774  | 4.820  | 3.311  | 9.552  | 11.214 |
| 13 | 0.4514 | 11.176 | 5.702  | 7.926  | 15.061 | 19.781 |
| 13 | 0.4524 | 3.158  | 3.356  | 3.005  | 1.019  | 1.530  |
| 13 | 0.4534 | 13.298 | 10.094 | 9.991  | 10.088 | 4.574  |
| 13 | 0.4544 | 10.412 | 10.905 | 8.441  | 10.469 | 4.473  |
| 13 | 0.4554 | 5.798  | 3.328  | 5.578  | 9.193  | 7.021  |
| 13 | 0.4564 | 11.838 | 7.418  | 10.142 | 10.692 | 14.020 |
| 13 | 0.4574 | 6.556  | 8.337  | 11.177 | 4.511  | 9.904  |
| 13 | 0.4584 | 7.315  | 4.580  | 6.885  | 6.681  | 5.104  |
| 13 | 0.4594 | 12.085 | 10.535 | 15.035 | 11.358 | 12.073 |
| 13 | 0.4604 | 5.058  | 8.341  | 6.233  | 6.103  | 4.839  |
| 13 | 0.4614 | 8.749  | 9.738  | 8.206  | 12.418 | 15.347 |
| 13 | 0.4624 | 8.277  | 11.103 | 8.458  | 12.363 | 11.151 |
| 13 | 0.4634 | 13.298 | 11.874 | 9.569  | 19.659 | 16.292 |
| 13 | 0.4644 | 11.818 | 7.312  | 9.323  | 11.328 | 8.461  |
| 13 | 0.4654 | 9.030  | 10.289 | 11.512 | 2.562  | 7.593  |
| 13 | 0.4664 | 21.645 | 20.391 | 20.628 | 11.748 | 9.857  |

|    |        |        |        |        |        |        |
|----|--------|--------|--------|--------|--------|--------|
| 13 | 0.4674 | 13.520 | 14.211 | 15.517 | 11.518 | 16.435 |
| 13 | 0.4684 | 19.913 | 8.694  | 15.799 | 16.402 | 12.517 |
| 13 | 0.4694 | 12.067 | 4.730  | 7.605  | 12.928 | 24.022 |
| 13 | 0.4704 | 12.071 | 4.746  | 7.613  | 12.918 | 24.028 |
| 13 | 0.4714 | 7.353  | 2.811  | 7.336  | 5.346  | 15.820 |
| 13 | 0.4724 | 7.912  | 4.808  | 5.188  | 9.964  | 10.990 |
| 13 | 0.4734 | 9.114  | 3.579  | 10.387 | 10.417 | 10.701 |
| 13 | 0.4744 | 2.486  | 1.399  | 1.526  | 1.896  | 7.703  |
| 13 | 0.4754 | 7.548  | 3.237  | 7.064  | 8.456  | 13.031 |
| 13 | 0.4764 | 13.920 | 6.149  | 8.836  | 13.769 | 18.644 |
| 13 | 0.4774 | 4.003  | 3.774  | 5.118  | 7.692  | 5.272  |
| 13 | 0.4784 | 6.010  | 10.133 | 5.360  | 18.075 | 6.652  |
| 13 | 0.4794 | 9.362  | 12.121 | 6.763  | 20.590 | 13.138 |
| 13 | 0.4804 | 6.832  | 5.054  | 6.710  | 12.538 | 13.980 |
| 13 | 0.4814 | 4.287  | 3.977  | 4.611  | 12.926 | 10.388 |
| 13 | 0.4824 | 7.048  | 4.024  | 4.949  | 10.565 | 16.937 |
| 13 | 0.4834 | 7.556  | 8.644  | 9.662  | 13.571 | 13.430 |
| 13 | 0.4844 | 9.999  | 7.675  | 9.578  | 12.850 | 5.766  |
| 13 | 0.4854 | 12.837 | 5.328  | 9.365  | 6.361  | 13.028 |
| 13 | 0.4864 | 13.666 | 12.854 | 8.823  | 17.958 | 16.428 |
| 13 | 0.4874 | 6.573  | 11.323 | 6.787  | 15.547 | 14.319 |
| 13 | 0.4884 | 14.119 | 11.872 | 11.316 | 19.251 | 21.565 |
| 13 | 0.4894 | 6.462  | 9.468  | 5.647  | 10.497 | 6.142  |
| 13 | 0.4904 | 5.691  | 7.344  | 6.227  | 9.584  | 15.494 |
| 13 | 0.4914 | 8.662  | 9.943  | 8.099  | 10.422 | 15.987 |
| 13 | 0.4924 | 11.682 | 9.451  | 11.418 | 15.317 | 12.171 |
| 13 | 0.4934 | 6.134  | 6.845  | 6.271  | 11.081 | 6.684  |
| 13 | 0.4944 | 4.225  | 8.239  | 5.633  | 6.821  | 9.067  |
| 13 | 0.4954 | 7.084  | 7.628  | 5.043  | 5.195  | 3.912  |
| 13 | 0.4964 | 15.395 | 8.109  | 8.467  | 13.224 | 9.867  |
| 13 | 0.4974 | 13.100 | 7.575  | 7.786  | 8.157  | 4.323  |
| 13 | 0.4984 | 6.776  | 9.257  | 9.965  | 7.874  | 5.789  |
| 13 | 0.4994 | 5.970  | 9.299  | 9.192  | 5.902  | 9.365  |
| 13 | 0.5004 | 9.280  | 11.725 | 11.116 | 9.425  | 10.019 |
| 13 | 0.5014 | 4.640  | 5.144  | 6.551  | 3.436  | 6.062  |
| 13 | 0.5024 | 4.069  | 5.010  | 4.900  | 5.284  | 2.962  |
| 13 | 0.5034 | 7.367  | 10.209 | 7.615  | 6.981  | 8.847  |
| 13 | 0.5044 | 2.624  | 4.377  | 2.541  | 5.320  | 8.124  |
| 13 | 0.5054 | 2.160  | 6.957  | 3.650  | 6.131  | 4.680  |
| 13 | 0.5064 | 1.627  | 5.795  | 3.611  | 11.313 | 7.509  |
| 13 | 0.5074 | 6.567  | 15.190 | 7.065  | 15.805 | 8.865  |
| 13 | 0.5084 | 11.036 | 9.712  | 8.245  | 13.361 | 18.189 |
| 13 | 0.5094 | 11.979 | 9.784  | 8.292  | 9.765  | 13.249 |
| 13 | 0.5104 | 17.109 | 15.192 | 14.096 | 6.407  | 15.702 |
| 13 | 0.5114 | 11.004 | 19.391 | 16.047 | 6.829  | 10.222 |
| 13 | 0.5124 | 12.016 | 6.930  | 10.000 | 14.452 | 15.751 |
| 13 | 0.5134 | 8.793  | 5.724  | 12.240 | 8.940  | 10.455 |
| 13 | 0.5144 | 3.630  | 2.184  | 5.181  | 1.537  | 10.236 |
| 13 | 0.5154 | 9.771  | 10.588 | 11.656 | 6.900  | 11.663 |
| 13 | 0.5164 | 6.253  | 8.098  | 6.094  | 12.481 | 11.029 |

|    |        |        |        |        |        |        |
|----|--------|--------|--------|--------|--------|--------|
| 13 | 0.5174 | 8.580  | 6.865  | 10.118 | 10.918 | 6.489  |
| 13 | 0.5184 | 6.310  | 5.696  | 11.086 | 4.645  | 14.429 |
| 13 | 0.5194 | 26.653 | 22.287 | 32.275 | 5.545  | 19.949 |
| 13 | 0.5204 | 26.664 | 22.315 | 32.278 | 5.423  | 20.011 |
| 13 | 0.5214 | 15.251 | 16.403 | 26.222 | 9.878  | 24.323 |
| 13 | 0.5224 | 15.217 | 16.379 | 26.163 | 9.885  | 24.301 |
| 13 | 0.5234 | 10.530 | 8.158  | 13.827 | 10.607 | 18.310 |
| 13 | 0.5244 | 10.343 | 8.827  | 10.728 | 12.831 | 13.981 |
| 13 | 0.5254 | 6.064  | 7.117  | 10.702 | 10.125 | 11.215 |
| 13 | 0.5264 | 8.112  | 5.609  | 9.456  | 7.221  | 19.149 |
| 13 | 0.5274 | 12.501 | 7.981  | 4.914  | 8.118  | 19.333 |
| 13 | 0.5284 | 9.118  | 8.097  | 5.100  | 5.039  | 12.106 |
| 13 | 0.5294 | 10.369 | 3.686  | 10.691 | 11.690 | 20.638 |
| 13 | 0.5304 | 6.447  | 4.279  | 4.726  | 23.618 | 15.431 |
| 13 | 0.5314 | 11.414 | 5.128  | 14.572 | 12.810 | 21.983 |
| 13 | 0.5324 | 9.660  | 11.938 | 13.767 | 11.541 | 10.725 |
| 13 | 0.5334 | 9.091  | 9.414  | 13.592 | 6.064  | 9.368  |
| 13 | 0.5344 | 10.595 | 6.714  | 5.027  | 15.096 | 24.381 |
| 13 | 0.5354 | 11.801 | 13.017 | 8.940  | 8.488  | 18.208 |
| 13 | 0.5364 | 16.237 | 12.332 | 18.860 | 11.017 | 25.594 |
| 13 | 0.5374 | 16.282 | 12.360 | 18.938 | 10.894 | 25.492 |
| 13 | 0.5384 | 13.532 | 9.544  | 13.030 | 4.342  | 6.796  |
| 13 | 0.5394 | 16.320 | 9.393  | 10.404 | 7.125  | 11.763 |
| 13 | 0.5404 | 23.010 | 13.320 | 17.429 | 15.182 | 12.587 |
| 13 | 0.5414 | 8.633  | 3.308  | 5.713  | 5.753  | 11.568 |
| 13 | 0.5424 | 10.059 | 7.100  | 13.226 | 11.878 | 17.725 |
| 13 | 0.5434 | 9.989  | 5.009  | 8.566  | 10.773 | 28.824 |
| 13 | 0.5444 | 10.550 | 5.181  | 7.561  | 11.962 | 25.482 |
| 13 | 0.5454 | 4.627  | 3.948  | 6.015  | 8.345  | 19.238 |
| 13 | 0.5464 | 6.315  | 7.767  | 7.284  | 16.223 | 25.272 |
| 13 | 0.5474 | 7.526  | 8.070  | 6.292  | 28.397 | 21.326 |
| 13 | 0.5484 | 14.894 | 17.897 | 13.111 | 23.500 | 26.983 |
| 13 | 0.5494 | 9.825  | 6.852  | 9.127  | 17.352 | 28.002 |
| 13 | 0.5504 | 4.467  | 4.749  | 4.662  | 7.299  | 2.954  |
| 13 | 0.5514 | 1.446  | 1.812  | 1.179  | 10.626 | 1.239  |
| 13 | 0.5524 | 1.372  | 2.090  | 2.838  | 8.595  | 3.048  |
| 13 | 0.5534 | 7.773  | 14.094 | 12.545 | 7.232  | 15.140 |
| 13 | 0.5544 | 13.353 | 11.471 | 10.940 | 18.351 | 18.997 |
| 13 | 0.5554 | 8.149  | 6.907  | 7.621  | 15.511 | 15.676 |
| 13 | 0.5564 | 8.206  | 6.932  | 7.639  | 15.475 | 15.582 |
| 13 | 0.5574 | 12.687 | 10.087 | 6.765  | 20.744 | 24.520 |
| 13 | 0.5584 | 9.968  | 13.262 | 10.519 | 19.280 | 23.133 |
| 13 | 0.5594 | 21.097 | 18.672 | 20.306 | 13.971 | 17.182 |
| 13 | 0.5604 | 21.205 | 11.190 | 10.400 | 17.641 | 31.894 |
| 13 | 0.5614 | 10.826 | 14.209 | 12.092 | 10.093 | 12.471 |
| 13 | 0.5624 | 8.123  | 15.131 | 10.940 | 8.366  | 13.139 |
| 13 | 0.5634 | 8.099  | 15.296 | 8.483  | 17.036 | 11.309 |
| 13 | 0.5644 | 6.012  | 12.785 | 6.118  | 23.368 | 5.877  |
| 13 | 0.5654 | 12.603 | 11.226 | 11.468 | 14.204 | 17.612 |
| 13 | 0.5664 | 25.101 | 15.933 | 12.265 | 26.269 | 32.049 |

|    |        |        |        |        |        |        |
|----|--------|--------|--------|--------|--------|--------|
| 13 | 0.5674 | 12.811 | 14.567 | 6.784  | 4.635  | 13.909 |
| 13 | 0.5684 | 10.149 | 7.181  | 6.579  | 13.192 | 19.338 |
| 13 | 0.5694 | 15.052 | 10.853 | 10.704 | 8.536  | 14.275 |
| 13 | 0.5704 | 16.352 | 14.475 | 13.719 | 11.492 | 13.755 |
| 13 | 0.5714 | 4.124  | 10.128 | 4.012  | 22.929 | 24.550 |
| 13 | 0.5724 | 7.862  | 11.428 | 6.120  | 21.870 | 17.621 |
| 13 | 0.5734 | 5.722  | 12.569 | 7.810  | 11.686 | 10.255 |
| 13 | 0.5744 | 4.746  | 10.676 | 6.668  | 11.811 | 10.644 |
| 13 | 0.5754 | 6.871  | 15.088 | 8.101  | 13.634 | 9.885  |
| 13 | 0.5764 | 3.401  | 6.414  | 3.323  | 6.888  | 10.360 |
| 13 | 0.5774 | 6.224  | 16.805 | 7.819  | 10.313 | 15.586 |
| 13 | 0.5784 | 12.093 | 10.059 | 11.078 | 5.317  | 18.677 |
| 13 | 0.5794 | 4.392  | 8.090  | 5.812  | 13.089 | 15.630 |
| 13 | 0.5804 | 11.377 | 12.884 | 14.553 | 21.247 | 19.660 |
| 13 | 0.5814 | 13.186 | 13.224 | 15.668 | 19.831 | 21.857 |
| 13 | 0.5824 | 12.707 | 14.251 | 17.738 | 3.316  | 9.754  |
| 13 | 0.5834 | 7.023  | 8.052  | 5.854  | 5.810  | 19.345 |
| 13 | 0.5844 | 11.078 | 5.805  | 6.796  | 14.195 | 16.854 |
| 13 | 0.5854 | 7.316  | 9.652  | 4.368  | 21.128 | 19.011 |
| 13 | 0.5864 | 11.434 | 13.060 | 8.128  | 19.806 | 20.444 |
| 13 | 0.5874 | 17.219 | 13.405 | 11.592 | 23.547 | 13.863 |
| 13 | 0.5884 | 17.176 | 13.428 | 11.574 | 23.488 | 13.850 |
| 13 | 0.5894 | 22.171 | 8.487  | 13.875 | 30.081 | 17.662 |
| 13 | 0.5904 | 19.643 | 5.760  | 13.082 | 28.208 | 18.473 |
| 13 | 0.5914 | 18.094 | 8.162  | 11.294 | 10.869 | 16.225 |
| 13 | 0.5924 | 3.506  | 6.602  | 5.067  | 12.601 | 15.170 |
| 13 | 0.5934 | 7.151  | 3.931  | 4.682  | 13.840 | 18.171 |
| 13 | 0.5944 | 5.747  | 9.591  | 5.996  | 13.562 | 17.667 |
| 13 | 0.5954 | 7.846  | 21.612 | 11.112 | 24.451 | 15.277 |
| 13 | 0.5964 | 8.445  | 14.016 | 9.719  | 18.703 | 11.279 |
| 13 | 0.5974 | 1.877  | 7.000  | 2.884  | 17.379 | 14.000 |
| 13 | 0.5984 | 4.173  | 8.672  | 3.920  | 13.881 | 14.482 |
| 13 | 0.5994 | 4.962  | 6.129  | 5.699  | 13.619 | 6.561  |
| 13 | 0.6004 | 2.303  | 6.880  | 4.686  | 7.692  | 9.759  |
| 13 | 0.6014 | 3.710  | 10.313 | 4.850  | 14.265 | 22.241 |
| 13 | 0.6024 | 5.990  | 10.030 | 10.080 | 10.930 | 14.197 |
| 13 | 0.6034 | 13.883 | 18.937 | 14.064 | 8.872  | 13.602 |
| 13 | 0.6044 | 10.382 | 14.193 | 13.948 | 7.647  | 17.525 |
| 13 | 0.6054 | 10.371 | 14.193 | 14.000 | 7.626  | 17.783 |
| 13 | 0.6064 | 9.250  | 9.870  | 12.425 | 6.206  | 11.809 |
| 13 | 0.6074 | 8.019  | 8.500  | 9.205  | 14.534 | 11.821 |
| 13 | 0.6084 | 8.000  | 8.525  | 9.212  | 14.570 | 11.823 |
| 13 | 0.6094 | 7.349  | 6.897  | 9.731  | 8.555  | 8.804  |
| 13 | 0.6104 | 1.373  | 3.062  | 1.814  | 6.844  | 6.597  |
| 13 | 0.6114 | 3.018  | 6.175  | 4.578  | 10.585 | 13.537 |
| 13 | 0.6124 | 2.737  | 5.216  | 1.354  | 11.628 | 14.214 |
| 13 | 0.6134 | 5.956  | 8.350  | 5.430  | 11.282 | 12.170 |
| 13 | 0.6144 | 5.721  | 8.910  | 5.552  | 17.432 | 13.756 |
| 13 | 0.6154 | 4.474  | 2.547  | 2.575  | 1.756  | 8.709  |
| 13 | 0.6164 | 4.956  | 2.971  | 3.955  | 2.771  | 11.422 |

|    |        |        |        |        |        |        |
|----|--------|--------|--------|--------|--------|--------|
| 13 | 0.6174 | 4.967  | 2.979  | 3.976  | 2.779  | 11.393 |
| 13 | 0.6184 | 4.979  | 2.986  | 3.996  | 2.788  | 11.364 |
| 13 | 0.6194 | 3.069  | 3.515  | 2.984  | 4.396  | 8.490  |
| 13 | 0.6204 | 10.549 | 9.926  | 12.024 | 19.919 | 16.038 |
| 13 | 0.6214 | 7.510  | 11.933 | 9.609  | 13.729 | 13.925 |
| 13 | 0.6224 | 5.405  | 12.624 | 9.232  | 22.554 | 23.976 |
| 13 | 0.6234 | 3.740  | 4.455  | 4.064  | 13.499 | 16.268 |
| 13 | 0.6244 | 4.074  | 12.549 | 7.794  | 9.108  | 9.464  |
| 13 | 0.6254 | 12.003 | 22.698 | 15.140 | 30.745 | 25.673 |
| 13 | 0.6264 | 8.765  | 22.340 | 11.987 | 25.934 | 17.747 |
| 13 | 0.6274 | 8.565  | 22.229 | 12.018 | 26.034 | 17.810 |
| 13 | 0.6284 | 1.997  | 6.628  | 5.127  | 16.876 | 11.065 |
| 13 | 0.6294 | 2.776  | 10.488 | 6.374  | 7.153  | 10.842 |
| 13 | 0.6304 | 5.469  | 11.775 | 8.039  | 12.191 | 14.692 |
| 13 | 0.6314 | 8.618  | 10.710 | 7.009  | 15.346 | 20.213 |
| 13 | 0.6324 | 13.663 | 23.727 | 14.629 | 31.113 | 23.477 |
| 13 | 0.6334 | 15.458 | 22.902 | 23.213 | 18.709 | 22.219 |
| 13 | 0.6344 | 8.250  | 12.199 | 12.610 | 16.128 | 25.627 |
| 13 | 0.6354 | 9.715  | 10.855 | 7.915  | 9.835  | 16.399 |
| 13 | 0.6364 | 16.760 | 17.623 | 17.308 | 10.240 | 14.733 |
| 13 | 0.6374 | 16.812 | 17.664 | 17.349 | 10.215 | 14.736 |
| 13 | 0.6384 | 11.156 | 11.498 | 7.374  | 9.854  | 11.187 |
| 13 | 0.6394 | 10.953 | 14.564 | 9.281  | 14.791 | 17.177 |
| 13 | 0.6404 | 10.970 | 14.607 | 9.301  | 14.813 | 17.175 |
| 13 | 0.6414 | 8.226  | 12.323 | 7.258  | 11.594 | 5.460  |
| 13 | 0.6424 | 13.286 | 20.560 | 12.954 | 16.925 | 16.270 |
| 13 | 0.6434 | 13.235 | 20.523 | 12.937 | 16.860 | 16.269 |
| 13 | 0.6444 | 11.226 | 14.833 | 13.158 | 11.938 | 13.597 |
| 13 | 0.6454 | 10.030 | 16.119 | 8.645  | 8.179  | 11.665 |
| 13 | 0.6464 | 10.393 | 13.470 | 9.693  | 5.953  | 9.647  |
| 13 | 0.6474 | 14.717 | 12.606 | 13.087 | 11.032 | 9.210  |
| 13 | 0.6484 | 16.566 | 17.669 | 13.105 | 9.388  | 8.835  |
| 13 | 0.6494 | 14.941 | 20.218 | 15.040 | 8.654  | 12.123 |
| 13 | 0.6504 | 16.096 | 23.927 | 16.780 | 9.827  | 10.689 |
| 13 | 0.6514 | 17.922 | 23.237 | 24.673 | 9.129  | 8.221  |
| 13 | 0.6524 | 13.954 | 17.624 | 17.214 | 8.535  | 5.175  |
| 13 | 0.6534 | 13.714 | 11.888 | 14.296 | 6.833  | 4.369  |
| 13 | 0.6544 | 13.719 | 11.901 | 14.298 | 6.853  | 4.385  |
| 13 | 0.6554 | 8.234  | 9.152  | 8.090  | 5.501  | 5.708  |
| 13 | 0.6564 | 7.952  | 13.848 | 9.961  | 10.121 | 6.162  |
| 13 | 0.6574 | 7.980  | 9.311  | 10.181 | 6.545  | 7.433  |
| 13 | 0.6584 | 8.115  | 9.822  | 9.849  | 9.729  | 9.833  |
| 13 | 0.6594 | 11.883 | 15.702 | 14.646 | 16.992 | 6.472  |
| 13 | 0.6604 | 20.643 | 19.599 | 23.468 | 11.284 | 7.688  |
| 13 | 0.6614 | 20.597 | 19.481 | 21.564 | 9.607  | 11.323 |
| 13 | 0.6624 | 16.538 | 14.710 | 17.986 | 19.795 | 14.322 |
| 13 | 0.6634 | 22.215 | 11.663 | 19.434 | 13.839 | 23.888 |
| 13 | 0.6644 | 13.052 | 10.404 | 11.757 | 16.375 | 20.251 |
| 13 | 0.6654 | 10.242 | 5.471  | 8.418  | 17.786 | 19.237 |
| 13 | 0.6664 | 13.417 | 8.670  | 11.380 | 14.847 | 12.977 |



|    |        |        |        |        |        |        |
|----|--------|--------|--------|--------|--------|--------|
| 13 | 0.6674 | 11.316 | 8.266  | 8.060  | 19.706 | 16.226 |
| 13 | 0.6684 | 11.809 | 6.142  | 9.307  | 13.576 | 7.581  |
| 13 | 0.6694 | 14.609 | 14.161 | 14.584 | 27.581 | 23.889 |
| 13 | 0.6704 | 11.051 | 12.650 | 10.472 | 14.801 | 21.319 |
| 13 | 0.6714 | 11.049 | 13.555 | 14.512 | 19.240 | 6.721  |
| 13 | 0.6724 | 14.638 | 18.535 | 20.562 | 18.659 | 20.392 |
| 13 | 0.6734 | 9.605  | 21.949 | 16.152 | 25.103 | 23.488 |
| 13 | 0.6744 | 9.746  | 19.164 | 11.329 | 27.670 | 22.302 |
| 13 | 0.6754 | 13.328 | 14.918 | 18.078 | 13.930 | 15.787 |
| 13 | 0.6764 | 10.555 | 19.082 | 16.152 | 22.220 | 11.103 |
| 13 | 0.6774 | 10.174 | 19.217 | 14.736 | 18.475 | 23.029 |
| 13 | 0.6784 | 5.028  | 2.161  | 4.261  | 5.384  | 17.679 |
| 13 | 0.6794 | 7.879  | 4.373  | 7.786  | 10.398 | 8.311  |
| 13 | 0.6804 | 4.424  | 6.938  | 10.319 | 16.580 | 9.249  |
| 13 | 0.6814 | 8.010  | 8.861  | 15.899 | 13.001 | 11.061 |
| 13 | 0.6824 | 17.438 | 17.833 | 19.623 | 14.449 | 19.335 |
| 13 | 0.6834 | 15.543 | 15.860 | 16.258 | 9.111  | 13.094 |
| 13 | 0.6844 | 6.635  | 20.305 | 14.330 | 20.942 | 15.287 |
| 13 | 0.6854 | 8.668  | 15.487 | 14.344 | 14.245 | 9.585  |
| 13 | 0.6864 | 12.205 | 13.804 | 20.751 | 13.479 | 14.876 |
| 13 | 0.6874 | 16.064 | 16.695 | 25.780 | 17.132 | 6.071  |
| 13 | 0.6884 | 16.283 | 11.405 | 10.920 | 23.203 | 10.781 |
| 13 | 0.6894 | 15.760 | 15.986 | 13.076 | 21.251 | 21.285 |
| 13 | 0.6904 | 12.791 | 21.874 | 19.106 | 23.219 | 17.134 |
| 13 | 0.6914 | 11.942 | 10.610 | 9.026  | 11.553 | 13.792 |
| 13 | 0.6924 | 4.155  | 6.322  | 4.270  | 14.515 | 11.034 |
| 13 | 0.6934 | 11.780 | 15.349 | 18.260 | 17.614 | 9.811  |
| 13 | 0.6944 | 15.565 | 13.652 | 17.805 | 23.708 | 20.172 |
| 13 | 0.6954 | 9.546  | 5.510  | 7.813  | 22.912 | 11.416 |
| 13 | 0.6964 | 8.786  | 7.539  | 10.516 | 20.309 | 8.178  |
| 13 | 0.6974 | 12.243 | 13.626 | 8.482  | 20.573 | 8.897  |
| 13 | 0.6984 | 18.022 | 13.204 | 8.906  | 12.847 | 12.512 |
| 13 | 0.6994 | 14.529 | 15.777 | 18.509 | 8.557  | 17.229 |
| 13 | 0.7004 | 14.877 | 18.423 | 21.563 | 21.075 | 20.073 |
| 13 | 0.7014 | 11.168 | 15.845 | 14.023 | 22.241 | 8.487  |
| 13 | 0.7024 | 15.793 | 8.554  | 13.678 | 29.020 | 15.154 |
| 13 | 0.7034 | 22.430 | 14.001 | 19.676 | 10.387 | 16.343 |
| 13 | 0.7044 | 24.500 | 19.909 | 20.696 | 18.156 | 20.747 |
| 13 | 0.7054 | 25.263 | 14.320 | 26.338 | 19.195 | 15.202 |
| 13 | 0.7064 | 29.322 | 15.664 | 29.642 | 28.670 | 14.064 |
| 13 | 0.7074 | 19.780 | 16.193 | 20.762 | 10.168 | 10.745 |
| 13 | 0.7084 | 17.747 | 11.006 | 18.690 | 10.878 | 13.101 |
| 13 | 0.7094 | 4.962  | 6.933  | 9.283  | 18.395 | 9.971  |
| 13 | 0.7104 | 4.440  | 5.621  | 7.604  | 12.198 | 8.010  |
| 13 | 0.7114 | 9.034  | 10.398 | 11.045 | 16.145 | 10.288 |
| 13 | 0.7124 | 12.851 | 11.558 | 16.213 | 18.287 | 19.566 |
| 13 | 0.7134 | 8.390  | 7.042  | 10.882 | 15.325 | 18.707 |
| 13 | 0.7144 | 10.909 | 6.904  | 9.643  | 7.884  | 11.923 |
| 13 | 0.7154 | 12.118 | 11.486 | 10.769 | 8.226  | 13.693 |
| 13 | 0.7164 | 7.391  | 14.235 | 10.800 | 15.579 | 21.444 |

|    |        |        |        |        |        |        |
|----|--------|--------|--------|--------|--------|--------|
| 13 | 0.7174 | 7.388  | 11.282 | 8.695  | 17.551 | 22.868 |
| 13 | 0.7184 | 16.367 | 18.497 | 21.173 | 18.953 | 16.813 |
| 13 | 0.7194 | 10.012 | 20.591 | 14.389 | 14.088 | 9.275  |
| 13 | 0.7204 | 15.068 | 20.853 | 16.610 | 8.982  | 6.650  |
| 13 | 0.7214 | 6.595  | 9.138  | 6.907  | 5.580  | 7.545  |
| 13 | 0.7224 | 10.998 | 12.020 | 8.335  | 7.008  | 6.017  |
| 13 | 0.7234 | 8.576  | 14.232 | 8.965  | 15.208 | 12.239 |
| 13 | 0.7244 | 10.918 | 22.429 | 14.229 | 13.773 | 12.672 |
| 13 | 0.7254 | 11.952 | 17.415 | 16.506 | 8.634  | 21.797 |
| 13 | 0.7264 | 12.018 | 14.714 | 14.787 | 11.780 | 19.145 |
| 13 | 0.7274 | 19.451 | 24.293 | 15.489 | 11.006 | 21.404 |
| 13 | 0.7284 | 12.513 | 16.413 | 10.717 | 12.807 | 27.884 |
| 13 | 0.7294 | 7.171  | 6.098  | 5.883  | 9.972  | 10.354 |
| 13 | 0.7304 | 8.072  | 4.369  | 11.755 | 9.304  | 18.629 |
| 13 | 0.7314 | 10.021 | 6.658  | 13.262 | 14.855 | 22.380 |
| 13 | 0.7324 | 15.390 | 18.008 | 15.768 | 17.400 | 16.745 |
| 13 | 0.7334 | 9.603  | 8.603  | 9.003  | 8.556  | 6.534  |
| 13 | 0.7344 | 3.817  | 6.664  | 6.800  | 7.619  | 4.992  |
| 13 | 0.7354 | 19.506 | 17.356 | 19.437 | 9.493  | 3.757  |
| 13 | 0.7364 | 10.518 | 7.942  | 9.577  | 9.568  | 17.028 |
| 13 | 0.7374 | 17.765 | 13.866 | 17.657 | 8.273  | 10.783 |
| 13 | 0.7384 | 8.370  | 8.560  | 11.579 | 14.859 | 19.709 |
| 13 | 0.7394 | 8.377  | 10.578 | 8.842  | 20.486 | 16.535 |
| 13 | 0.7404 | 12.826 | 11.451 | 9.164  | 19.966 | 14.395 |
| 13 | 0.7414 | 8.654  | 9.257  | 10.094 | 5.196  | 5.859  |
| 13 | 0.7424 | 8.571  | 10.296 | 14.369 | 28.261 | 11.876 |
| 13 | 0.7434 | 26.065 | 14.105 | 22.043 | 18.541 | 12.607 |
| 13 | 0.7444 | 11.666 | 26.859 | 14.218 | 12.710 | 8.093  |
| 13 | 0.7454 | 11.297 | 12.526 | 10.152 | 13.945 | 24.221 |
| 13 | 0.7464 | 11.227 | 17.347 | 18.794 | 9.638  | 15.793 |
| 13 | 0.7474 | 14.213 | 13.066 | 15.638 | 17.336 | 11.386 |
| 13 | 0.7484 | 18.850 | 16.128 | 21.155 | 23.528 | 23.117 |
| 13 | 0.7494 | 16.110 | 25.779 | 25.088 | 18.294 | 13.832 |
| 13 | 0.7504 | 11.730 | 20.153 | 17.602 | 20.889 | 13.292 |
| 13 | 0.7514 | 10.299 | 26.798 | 15.979 | 14.427 | 8.409  |
| 13 | 0.7524 | 6.138  | 17.963 | 10.606 | 15.445 | 7.374  |
| 13 | 0.7534 | 8.804  | 25.806 | 12.740 | 35.722 | 10.530 |
| 13 | 0.7544 | 7.695  | 15.245 | 14.353 | 18.009 | 7.804  |
| 13 | 0.7554 | 16.279 | 23.921 | 20.567 | 13.965 | 8.423  |
| 13 | 0.7564 | 17.327 | 20.271 | 18.514 | 32.852 | 13.034 |
| 13 | 0.7574 | 22.040 | 21.558 | 18.463 | 15.530 | 21.316 |
| 13 | 0.7584 | 21.941 | 22.900 | 21.638 | 27.076 | 16.051 |
| 13 | 0.7594 | 18.048 | 12.543 | 12.802 | 20.627 | 19.056 |
| 13 | 0.7604 | 22.833 | 14.741 | 19.899 | 13.503 | 10.249 |
| 13 | 0.7614 | 31.018 | 22.913 | 25.878 | 11.609 | 24.763 |
| 13 | 0.7624 | 16.756 | 29.117 | 22.282 | 15.578 | 21.812 |
| 13 | 0.7634 | 12.968 | 23.924 | 17.419 | 8.076  | 6.144  |
| 13 | 0.7644 | 11.078 | 18.383 | 9.271  | 11.098 | 13.656 |
| 13 | 0.7654 | 23.071 | 19.240 | 14.876 | 12.766 | 21.362 |
| 13 | 0.7664 | 5.751  | 5.102  | 7.355  | 9.788  | 7.552  |

|    |        |        |        |        |        |        |
|----|--------|--------|--------|--------|--------|--------|
| 13 | 0.7674 | 17.223 | 26.618 | 22.582 | 17.777 | 13.741 |
| 13 | 0.7684 | 29.926 | 19.517 | 29.825 | 19.520 | 12.067 |
| 13 | 0.7694 | 22.248 | 20.648 | 20.013 | 12.510 | 13.556 |
| 13 | 0.7704 | 16.800 | 19.106 | 24.905 | 17.898 | 18.732 |
| 13 | 0.7714 | 14.307 | 19.811 | 19.305 | 17.366 | 16.280 |
| 13 | 0.7724 | 22.306 | 25.388 | 21.024 | 6.589  | 19.713 |
| 13 | 0.7734 | 7.906  | 14.120 | 12.100 | 18.152 | 22.920 |
| 13 | 0.7744 | 14.057 | 20.912 | 12.409 | 23.539 | 12.624 |
| 13 | 0.7754 | 23.614 | 29.467 | 25.951 | 21.236 | 13.208 |
| 13 | 0.7764 | 10.600 | 8.179  | 10.614 | 12.654 | 12.815 |
| 13 | 0.7774 | 17.482 | 24.427 | 12.300 | 27.528 | 21.253 |
| 13 | 0.7784 | 9.872  | 10.872 | 11.243 | 18.220 | 12.259 |
| 13 | 0.7794 | 20.625 | 23.857 | 18.628 | 12.268 | 16.896 |
| 13 | 0.7804 | 39.640 | 31.209 | 35.433 | 15.685 | 19.416 |
| 13 | 0.7814 | 22.409 | 32.411 | 20.445 | 15.200 | 19.249 |
| 13 | 0.7824 | 31.241 | 26.137 | 19.600 | 10.994 | 19.796 |
| 13 | 0.7834 | 28.697 | 34.750 | 31.151 | 11.158 | 13.848 |
| 13 | 0.7844 | 37.149 | 50.104 | 37.223 | 18.213 | 13.938 |
| 13 | 0.7854 | 19.504 | 20.351 | 13.669 | 13.587 | 21.448 |
| 13 | 0.7864 | 24.230 | 26.376 | 20.655 | 17.437 | 19.710 |
| 13 | 0.7874 | 19.249 | 21.218 | 19.016 | 10.948 | 12.509 |
| 13 | 0.7884 | 13.025 | 25.613 | 19.453 | 28.483 | 19.523 |
| 13 | 0.7894 | 17.141 | 25.386 | 15.772 | 17.929 | 29.730 |
| 13 | 0.7904 | 8.097  | 14.251 | 10.720 | 20.232 | 20.418 |
| 13 | 0.7914 | 11.937 | 15.703 | 14.539 | 13.993 | 14.341 |
| 13 | 0.7924 | 8.346  | 11.167 | 8.397  | 16.189 | 18.403 |
| 13 | 0.7934 | 9.434  | 15.813 | 12.124 | 10.631 | 12.722 |
| 13 | 0.7944 | 11.224 | 20.758 | 14.599 | 16.132 | 13.258 |
| 13 | 0.7954 | 15.177 | 22.158 | 18.290 | 15.213 | 24.093 |
| 13 | 0.7964 | 11.529 | 15.467 | 12.173 | 10.078 | 13.124 |
| 13 | 0.7974 | 7.993  | 8.809  | 9.020  | 13.895 | 10.136 |
| 13 | 0.7984 | 15.351 | 18.083 | 11.166 | 15.138 | 20.979 |
| 13 | 0.7994 | 16.589 | 12.743 | 11.791 | 13.199 | 20.544 |
| 13 | 0.8004 | 9.737  | 10.030 | 13.391 | 15.350 | 13.746 |
| 13 | 0.8014 | 17.481 | 26.346 | 23.002 | 10.203 | 17.001 |
| 13 | 0.8024 | 12.382 | 12.989 | 11.337 | 3.045  | 6.750  |
| 13 | 0.8034 | 8.174  | 14.785 | 10.401 | 8.662  | 13.673 |
| 13 | 0.8044 | 8.307  | 8.475  | 11.559 | 8.445  | 30.913 |
| 13 | 0.8054 | 11.827 | 14.579 | 14.070 | 6.134  | 8.550  |
| 13 | 0.8064 | 0.000  | 0.000  | 0.000  | 0.000  | 0.000  |
| 14 | 0.0010 | 0.000  | 0.000  | 0.000  | 0.000  | 0.000  |
| 14 | 0.0020 | 0.000  | 0.000  | 0.000  | 0.000  | 0.000  |
| 14 | 0.0030 | 15.201 | 4.514  | 12.064 | 23.444 | 15.772 |
| 14 | 0.0040 | 20.099 | 10.276 | 13.047 | 37.218 | 21.423 |
| 14 | 0.0050 | 16.914 | 10.363 | 7.741  | 15.146 | 12.731 |
| 14 | 0.0060 | 22.429 | 15.841 | 8.909  | 23.199 | 22.886 |
| 14 | 0.0070 | 18.491 | 15.651 | 13.182 | 26.707 | 17.774 |
| 14 | 0.0080 | 34.657 | 25.179 | 28.736 | 17.832 | 27.083 |
| 14 | 0.0090 | 12.819 | 10.379 | 8.539  | 8.930  | 16.871 |
| 14 | 0.0100 | 24.618 | 12.746 | 20.235 | 42.698 | 21.683 |

|    |        |        |        |        |        |        |
|----|--------|--------|--------|--------|--------|--------|
| 14 | 0.0110 | 16.221 | 16.051 | 14.699 | 31.997 | 12.568 |
| 14 | 0.0120 | 20.841 | 16.735 | 11.961 | 24.860 | 16.709 |
| 14 | 0.0130 | 21.907 | 17.946 | 13.427 | 21.440 | 22.125 |
| 14 | 0.0140 | 17.930 | 13.755 | 11.743 | 29.424 | 6.388  |
| 14 | 0.0150 | 19.181 | 12.282 | 13.463 | 31.616 | 16.314 |
| 14 | 0.0160 | 12.721 | 14.109 | 5.733  | 27.397 | 8.326  |
| 14 | 0.0170 | 31.615 | 15.610 | 20.231 | 21.159 | 18.501 |
| 14 | 0.0180 | 16.859 | 17.919 | 8.814  | 31.233 | 12.848 |
| 14 | 0.0190 | 32.214 | 16.063 | 15.846 | 44.702 | 33.457 |
| 14 | 0.0200 | 26.438 | 12.371 | 10.969 | 35.766 | 17.069 |
| 14 | 0.0210 | 22.276 | 19.758 | 6.929  | 37.490 | 21.701 |
| 14 | 0.0220 | 18.471 | 17.561 | 9.515  | 31.909 | 19.286 |
| 14 | 0.0230 | 26.438 | 15.081 | 14.712 | 26.499 | 15.200 |
| 14 | 0.0240 | 25.505 | 13.093 | 13.155 | 30.843 | 18.704 |
| 14 | 0.0250 | 18.949 | 13.661 | 7.724  | 39.013 | 20.740 |
| 14 | 0.0260 | 21.077 | 11.652 | 7.657  | 24.735 | 20.269 |
| 14 | 0.0270 | 13.783 | 11.243 | 9.317  | 20.884 | 16.281 |
| 14 | 0.0280 | 19.238 | 18.161 | 15.893 | 33.714 | 17.595 |
| 14 | 0.0290 | 20.215 | 14.300 | 9.472  | 19.892 | 12.394 |
| 14 | 0.0300 | 22.051 | 15.386 | 12.480 | 34.515 | 15.240 |
| 14 | 0.0310 | 14.326 | 9.548  | 5.071  | 14.535 | 9.434  |
| 14 | 0.0320 | 20.450 | 14.211 | 13.848 | 14.279 | 12.922 |
| 14 | 0.0330 | 32.498 | 17.618 | 16.946 | 26.998 | 15.634 |
| 14 | 0.0340 | 15.864 | 16.144 | 13.341 | 25.293 | 10.633 |
| 14 | 0.0350 | 12.169 | 14.269 | 9.563  | 24.317 | 6.660  |
| 14 | 0.0360 | 11.312 | 17.238 | 16.759 | 15.726 | 13.528 |
| 14 | 0.0370 | 13.149 | 21.031 | 14.007 | 35.167 | 27.261 |
| 14 | 0.0380 | 5.458  | 9.202  | 4.210  | 26.560 | 13.037 |
| 14 | 0.0390 | 12.269 | 12.462 | 14.411 | 29.225 | 22.349 |
| 14 | 0.0400 | 17.566 | 13.762 | 15.571 | 31.549 | 20.248 |
| 14 | 0.0410 | 5.921  | 12.171 | 8.751  | 29.503 | 11.641 |
| 14 | 0.0420 | 15.168 | 18.960 | 13.377 | 35.104 | 14.239 |
| 14 | 0.0430 | 11.583 | 15.629 | 9.190  | 19.965 | 17.890 |
| 14 | 0.0440 | 10.821 | 11.536 | 9.272  | 23.614 | 9.278  |
| 14 | 0.0450 | 15.148 | 11.855 | 10.030 | 28.042 | 15.180 |
| 14 | 0.0460 | 10.971 | 7.277  | 10.403 | 12.736 | 18.102 |
| 14 | 0.0470 | 9.267  | 10.200 | 15.199 | 24.050 | 10.952 |
| 14 | 0.0480 | 8.069  | 5.917  | 6.906  | 15.319 | 14.221 |
| 14 | 0.0490 | 21.906 | 14.095 | 17.532 | 12.667 | 11.839 |
| 14 | 0.0500 | 13.990 | 6.081  | 13.714 | 35.889 | 15.393 |
| 14 | 0.0510 | 8.756  | 12.412 | 8.625  | 38.519 | 26.643 |
| 14 | 0.0520 | 22.376 | 12.123 | 8.934  | 55.976 | 35.246 |
| 14 | 0.0530 | 11.315 | 14.014 | 16.842 | 42.518 | 24.443 |
| 14 | 0.0540 | 13.395 | 15.554 | 14.608 | 24.714 | 16.097 |
| 14 | 0.0550 | 27.523 | 13.328 | 25.922 | 38.590 | 24.296 |
| 14 | 0.0560 | 15.190 | 5.498  | 10.769 | 26.826 | 18.574 |
| 14 | 0.0570 | 19.627 | 21.689 | 16.919 | 21.132 | 14.528 |
| 14 | 0.0580 | 23.469 | 21.171 | 19.338 | 41.540 | 17.052 |
| 14 | 0.0590 | 13.776 | 12.983 | 9.588  | 53.082 | 14.916 |
| 14 | 0.0600 | 21.055 | 14.865 | 16.307 | 49.504 | 31.770 |

|    |        |        |        |        |         |        |
|----|--------|--------|--------|--------|---------|--------|
| 14 | 0.0610 | 39.837 | 20.203 | 26.228 | 46.726  | 37.893 |
| 14 | 0.0620 | 34.528 | 9.615  | 18.271 | 45.743  | 27.704 |
| 14 | 0.0630 | 16.259 | 14.599 | 12.743 | 26.362  | 16.804 |
| 14 | 0.0640 | 3.579  | 4.657  | 4.214  | 6.060   | 5.880  |
| 14 | 0.0650 | 15.880 | 11.111 | 12.071 | 35.539  | 10.978 |
| 14 | 0.0660 | 15.742 | 10.489 | 12.109 | 23.423  | 8.320  |
| 14 | 0.0670 | 13.354 | 10.910 | 15.136 | 23.943  | 12.323 |
| 14 | 0.0680 | 13.725 | 10.233 | 7.428  | 38.249  | 16.815 |
| 14 | 0.0690 | 7.615  | 5.328  | 5.943  | 10.290  | 13.298 |
| 14 | 0.0700 | 10.187 | 6.729  | 12.723 | 16.273  | 8.922  |
| 14 | 0.0710 | 7.690  | 7.314  | 10.334 | 7.922   | 9.228  |
| 14 | 0.0720 | 10.838 | 5.689  | 7.420  | 23.144  | 12.340 |
| 14 | 0.0730 | 23.330 | 10.170 | 18.142 | 41.825  | 17.348 |
| 14 | 0.0740 | 31.435 | 18.991 | 22.738 | 40.647  | 22.501 |
| 14 | 0.0750 | 26.938 | 25.653 | 24.175 | 57.612  | 34.977 |
| 14 | 0.0760 | 20.257 | 12.846 | 18.672 | 33.118  | 30.440 |
| 14 | 0.0770 | 18.609 | 17.206 | 13.986 | 44.779  | 17.237 |
| 14 | 0.0780 | 21.499 | 7.023  | 17.967 | 43.621  | 18.644 |
| 14 | 0.0790 | 12.655 | 7.426  | 10.900 | 14.639  | 5.896  |
| 14 | 0.0800 | 14.381 | 8.878  | 12.642 | 21.992  | 14.297 |
| 14 | 0.0810 | 15.143 | 7.562  | 14.555 | 38.919  | 9.974  |
| 14 | 0.0820 | 21.579 | 5.532  | 16.429 | 46.283  | 9.619  |
| 14 | 0.0830 | 26.384 | 12.590 | 21.515 | 47.575  | 29.559 |
| 14 | 0.0840 | 23.009 | 16.561 | 22.368 | 47.561  | 29.117 |
| 14 | 0.0850 | 7.406  | 7.464  | 8.759  | 38.291  | 24.278 |
| 14 | 0.0860 | 8.431  | 11.748 | 8.788  | 27.651  | 6.790  |
| 14 | 0.0870 | 16.544 | 19.897 | 15.349 | 67.463  | 31.112 |
| 14 | 0.0880 | 7.576  | 12.598 | 6.589  | 32.766  | 14.862 |
| 14 | 0.0890 | 19.329 | 9.894  | 14.336 | 9.163   | 20.011 |
| 14 | 0.0900 | 10.658 | 9.873  | 14.298 | 47.940  | 25.211 |
| 14 | 0.0910 | 17.200 | 20.789 | 16.641 | 55.734  | 11.676 |
| 14 | 0.0920 | 17.238 | 16.560 | 10.314 | 53.484  | 27.251 |
| 14 | 0.0930 | 16.236 | 21.028 | 16.388 | 26.160  | 21.235 |
| 14 | 0.0940 | 11.225 | 13.126 | 14.773 | 18.854  | 15.173 |
| 14 | 0.0950 | 10.170 | 17.550 | 10.112 | 39.271  | 13.183 |
| 14 | 0.0960 | 10.607 | 9.233  | 10.460 | 41.608  | 24.546 |
| 14 | 0.0970 | 13.801 | 13.749 | 15.473 | 26.626  | 19.533 |
| 14 | 0.0980 | 21.323 | 19.176 | 22.899 | 41.429  | 16.463 |
| 14 | 0.0990 | 9.307  | 12.449 | 9.150  | 50.092  | 43.037 |
| 14 | 0.1000 | 17.729 | 16.483 | 19.959 | 80.997  | 39.101 |
| 14 | 0.1010 | 14.981 | 13.729 | 19.659 | 68.543  | 16.398 |
| 14 | 0.1020 | 19.600 | 25.002 | 17.826 | 83.775  | 23.620 |
| 14 | 0.1030 | 12.420 | 14.990 | 10.953 | 25.537  | 31.765 |
| 14 | 0.1040 | 9.152  | 10.779 | 8.748  | 25.222  | 15.689 |
| 14 | 0.1050 | 13.758 | 8.758  | 13.018 | 37.204  | 17.160 |
| 14 | 0.1060 | 5.451  | 16.513 | 6.402  | 84.887  | 17.496 |
| 14 | 0.1070 | 7.562  | 17.471 | 10.286 | 104.211 | 23.440 |
| 14 | 0.1080 | 7.581  | 17.815 | 10.211 | 105.327 | 23.477 |
| 14 | 0.1090 | 7.578  | 18.058 | 10.106 | 105.465 | 23.507 |
| 14 | 0.1100 | 15.275 | 13.848 | 14.271 | 73.570  | 21.435 |

|    |        |        |        |        |         |        |
|----|--------|--------|--------|--------|---------|--------|
| 14 | 0.1110 | 18.426 | 19.967 | 17.817 | 74.102  | 17.081 |
| 14 | 0.1120 | 20.660 | 25.703 | 23.610 | 79.377  | 21.655 |
| 14 | 0.1130 | 11.079 | 8.649  | 18.061 | 32.399  | 12.593 |
| 14 | 0.1140 | 16.809 | 23.539 | 21.089 | 27.357  | 32.153 |
| 14 | 0.1150 | 19.205 | 30.761 | 17.911 | 112.050 | 31.061 |
| 14 | 0.1160 | 11.003 | 26.447 | 13.765 | 78.296  | 19.282 |
| 14 | 0.1170 | 16.490 | 27.922 | 21.180 | 60.805  | 17.535 |
| 14 | 0.1180 | 34.971 | 29.626 | 32.705 | 62.478  | 31.059 |
| 14 | 0.1190 | 17.747 | 16.872 | 17.563 | 61.921  | 32.852 |
| 14 | 0.1200 | 24.747 | 17.807 | 27.493 | 83.564  | 19.937 |
| 14 | 0.1210 | 22.043 | 22.101 | 21.255 | 100.040 | 27.042 |
| 14 | 0.1220 | 31.330 | 22.632 | 27.701 | 79.324  | 29.608 |
| 14 | 0.1230 | 31.412 | 22.813 | 27.901 | 79.552  | 29.602 |
| 14 | 0.1240 | 26.581 | 27.703 | 26.712 | 72.329  | 26.285 |
| 14 | 0.1250 | 9.507  | 23.054 | 10.439 | 38.812  | 25.321 |
| 14 | 0.1260 | 13.849 | 22.424 | 12.336 | 48.968  | 31.837 |
| 14 | 0.1270 | 13.827 | 22.437 | 12.345 | 49.112  | 31.795 |
| 14 | 0.1280 | 9.372  | 16.672 | 12.520 | 36.616  | 20.196 |
| 14 | 0.1290 | 10.329 | 19.499 | 12.121 | 31.050  | 16.837 |
| 14 | 0.1300 | 13.525 | 19.095 | 18.068 | 47.509  | 37.791 |
| 14 | 0.1310 | 17.125 | 27.838 | 19.116 | 48.402  | 34.718 |
| 14 | 0.1320 | 14.716 | 16.180 | 17.879 | 19.982  | 21.122 |
| 14 | 0.1330 | 12.317 | 18.790 | 18.715 | 35.433  | 24.205 |
| 14 | 0.1340 | 21.381 | 18.989 | 16.672 | 67.182  | 38.504 |
| 14 | 0.1350 | 0.931  | 17.587 | 1.607  | 51.917  | 11.042 |
| 14 | 0.1360 | 23.654 | 18.410 | 20.000 | 69.598  | 23.199 |
| 14 | 0.1370 | 21.750 | 20.646 | 20.872 | 35.019  | 31.516 |
| 14 | 0.1380 | 42.120 | 30.530 | 32.567 | 74.817  | 35.073 |
| 14 | 0.1390 | 27.336 | 24.813 | 33.410 | 43.861  | 28.513 |
| 14 | 0.1400 | 16.754 | 35.180 | 21.931 | 64.065  | 22.582 |
| 14 | 0.1410 | 15.527 | 22.102 | 18.881 | 49.268  | 2.771  |
| 14 | 0.1420 | 14.866 | 22.402 | 18.535 | 77.877  | 17.080 |
| 14 | 0.1430 | 16.318 | 17.800 | 12.225 | 62.507  | 30.289 |
| 14 | 0.1440 | 13.463 | 17.020 | 12.402 | 56.673  | 29.506 |
| 14 | 0.1450 | 41.313 | 29.085 | 28.197 | 86.702  | 38.675 |
| 14 | 0.1460 | 34.245 | 24.855 | 22.564 | 55.750  | 40.930 |
| 14 | 0.1470 | 38.631 | 44.720 | 32.159 | 38.947  | 27.184 |
| 14 | 0.1480 | 16.646 | 22.647 | 12.361 | 44.811  | 36.760 |
| 14 | 0.1490 | 24.133 | 34.055 | 16.792 | 63.418  | 41.888 |
| 14 | 0.1500 | 24.732 | 22.462 | 19.974 | 73.380  | 30.068 |
| 14 | 0.1510 | 14.224 | 18.637 | 20.999 | 52.846  | 36.790 |
| 14 | 0.1520 | 15.715 | 20.944 | 15.337 | 40.787  | 11.096 |
| 14 | 0.1530 | 24.911 | 32.427 | 21.900 | 71.388  | 23.015 |
| 14 | 0.1540 | 7.265  | 13.962 | 4.935  | 40.521  | 14.361 |
| 14 | 0.1550 | 13.535 | 18.537 | 16.050 | 65.051  | 25.274 |
| 14 | 0.1560 | 16.445 | 23.153 | 16.861 | 77.987  | 17.896 |
| 14 | 0.1570 | 19.521 | 23.486 | 18.504 | 30.553  | 25.264 |
| 14 | 0.1580 | 6.606  | 8.677  | 9.408  | 12.383  | 10.599 |
| 14 | 0.1590 | 20.889 | 16.053 | 20.911 | 29.055  | 16.755 |
| 14 | 0.1600 | 15.778 | 18.271 | 20.211 | 25.898  | 14.466 |

|    |        |        |        |        |        |        |
|----|--------|--------|--------|--------|--------|--------|
| 14 | 0.1610 | 14.144 | 21.790 | 19.809 | 23.747 | 13.910 |
| 14 | 0.1620 | 16.226 | 20.607 | 24.360 | 60.120 | 22.582 |
| 14 | 0.1630 | 12.215 | 23.944 | 27.926 | 50.520 | 26.527 |
| 14 | 0.1640 | 12.356 | 16.837 | 13.990 | 47.073 | 32.634 |
| 14 | 0.1650 | 25.417 | 27.286 | 22.895 | 34.908 | 17.218 |
| 14 | 0.1660 | 19.907 | 29.451 | 15.954 | 35.068 | 16.824 |
| 14 | 0.1670 | 19.355 | 31.269 | 15.112 | 45.544 | 20.409 |
| 14 | 0.1680 | 20.117 | 30.785 | 17.182 | 51.358 | 22.095 |
| 14 | 0.1690 | 25.929 | 18.650 | 30.405 | 16.574 | 15.388 |
| 14 | 0.1700 | 19.442 | 19.629 | 17.474 | 53.244 | 19.978 |
| 14 | 0.1710 | 25.315 | 15.741 | 24.926 | 18.967 | 18.539 |
| 14 | 0.1720 | 22.575 | 15.210 | 23.780 | 37.885 | 41.492 |
| 14 | 0.1730 | 22.546 | 15.191 | 23.882 | 37.677 | 41.231 |
| 14 | 0.1740 | 23.534 | 23.458 | 23.745 | 36.859 | 30.325 |
| 14 | 0.1750 | 16.695 | 16.656 | 13.427 | 42.377 | 28.879 |
| 14 | 0.1760 | 21.486 | 18.561 | 15.803 | 38.438 | 27.753 |
| 14 | 0.1770 | 18.140 | 24.088 | 28.628 | 25.741 | 19.297 |
| 14 | 0.1780 | 18.514 | 19.940 | 21.462 | 9.895  | 17.104 |
| 14 | 0.1790 | 9.319  | 12.251 | 12.518 | 30.852 | 13.149 |
| 14 | 0.1800 | 14.928 | 6.973  | 16.032 | 33.262 | 9.797  |
| 14 | 0.1810 | 21.571 | 13.079 | 20.892 | 31.107 | 12.674 |
| 14 | 0.1820 | 15.416 | 9.712  | 19.665 | 23.800 | 27.481 |
| 14 | 0.1830 | 7.739  | 17.113 | 8.454  | 47.269 | 21.906 |
| 14 | 0.1840 | 20.363 | 19.250 | 23.254 | 28.817 | 18.033 |
| 14 | 0.1850 | 15.047 | 12.465 | 13.304 | 36.043 | 13.568 |
| 14 | 0.1860 | 20.127 | 21.599 | 17.664 | 25.225 | 10.370 |
| 14 | 0.1870 | 12.390 | 18.536 | 11.113 | 27.014 | 24.137 |
| 14 | 0.1880 | 11.828 | 21.310 | 19.183 | 22.874 | 30.310 |
| 14 | 0.1890 | 14.717 | 13.091 | 13.266 | 22.470 | 19.246 |
| 14 | 0.1900 | 14.120 | 16.406 | 11.327 | 37.363 | 41.469 |
| 14 | 0.1910 | 18.917 | 18.734 | 13.549 | 42.615 | 37.101 |
| 14 | 0.1920 | 19.620 | 8.497  | 12.488 | 15.275 | 11.153 |
| 14 | 0.1930 | 19.269 | 21.590 | 20.046 | 46.057 | 30.144 |
| 14 | 0.1940 | 19.543 | 19.862 | 20.057 | 42.031 | 28.469 |
| 14 | 0.1950 | 9.418  | 12.630 | 12.430 | 22.147 | 17.437 |
| 14 | 0.1960 | 20.140 | 12.717 | 16.237 | 19.684 | 18.155 |
| 14 | 0.1970 | 9.416  | 4.726  | 11.339 | 19.199 | 10.931 |
| 14 | 0.1980 | 24.726 | 18.882 | 21.286 | 17.797 | 22.315 |
| 14 | 0.1990 | 16.659 | 19.927 | 13.462 | 39.039 | 28.274 |
| 14 | 0.2000 | 9.718  | 21.892 | 14.166 | 44.356 | 19.383 |
| 14 | 0.2010 | 8.157  | 18.404 | 12.162 | 45.532 | 15.688 |
| 14 | 0.2020 | 32.959 | 25.329 | 28.613 | 25.106 | 20.872 |
| 14 | 0.2030 | 13.020 | 19.962 | 11.270 | 29.611 | 19.085 |
| 14 | 0.2040 | 16.893 | 19.951 | 16.259 | 31.919 | 33.965 |
| 14 | 0.2050 | 17.585 | 17.362 | 14.956 | 34.809 | 19.242 |
| 14 | 0.2060 | 5.883  | 15.914 | 7.775  | 31.365 | 16.559 |
| 14 | 0.2070 | 19.686 | 13.716 | 14.001 | 16.030 | 9.655  |
| 14 | 0.2080 | 19.085 | 15.775 | 15.926 | 24.670 | 10.487 |
| 14 | 0.2090 | 6.553  | 17.516 | 11.116 | 33.916 | 8.871  |
| 14 | 0.2100 | 8.235  | 8.677  | 5.545  | 22.916 | 17.603 |

|    |        |        |        |        |        |        |
|----|--------|--------|--------|--------|--------|--------|
| 14 | 0.2110 | 14.470 | 16.239 | 19.885 | 22.075 | 9.885  |
| 14 | 0.2120 | 14.446 | 13.291 | 16.863 | 20.286 | 13.330 |
| 14 | 0.2130 | 9.222  | 11.355 | 14.256 | 29.451 | 20.295 |
| 14 | 0.2140 | 5.124  | 7.241  | 6.798  | 21.844 | 9.319  |
| 14 | 0.2150 | 17.253 | 16.499 | 14.052 | 35.457 | 9.333  |
| 14 | 0.2160 | 15.440 | 17.635 | 14.806 | 23.603 | 8.424  |
| 14 | 0.2170 | 8.601  | 8.914  | 9.631  | 19.605 | 19.301 |
| 14 | 0.2180 | 7.237  | 8.459  | 10.127 | 16.883 | 8.819  |
| 14 | 0.2190 | 10.599 | 9.154  | 10.717 | 22.832 | 10.234 |
| 14 | 0.2200 | 6.170  | 20.426 | 10.323 | 28.105 | 13.119 |
| 14 | 0.2210 | 8.862  | 14.968 | 9.462  | 18.115 | 15.796 |
| 14 | 0.2220 | 11.366 | 17.014 | 15.592 | 14.963 | 9.831  |
| 14 | 0.2230 | 9.481  | 15.567 | 12.604 | 16.871 | 15.052 |
| 14 | 0.2240 | 11.662 | 15.466 | 11.914 | 14.024 | 9.502  |
| 14 | 0.2250 | 9.513  | 13.886 | 15.364 | 21.153 | 11.002 |
| 14 | 0.2260 | 10.729 | 12.121 | 15.860 | 16.160 | 9.584  |
| 14 | 0.2270 | 8.530  | 14.890 | 10.247 | 28.987 | 10.732 |
| 14 | 0.2280 | 9.481  | 10.517 | 6.680  | 22.056 | 16.180 |
| 14 | 0.2290 | 11.386 | 16.772 | 16.210 | 24.694 | 7.840  |
| 14 | 0.2300 | 24.395 | 19.002 | 22.856 | 14.318 | 18.741 |
| 14 | 0.2310 | 10.221 | 11.744 | 9.047  | 18.482 | 7.886  |
| 14 | 0.2320 | 11.573 | 14.442 | 14.553 | 20.522 | 20.772 |
| 14 | 0.2330 | 13.135 | 22.568 | 19.363 | 23.194 | 17.107 |
| 14 | 0.2340 | 13.843 | 28.417 | 23.136 | 27.184 | 23.166 |
| 14 | 0.2350 | 13.116 | 15.963 | 19.352 | 17.059 | 19.016 |
| 14 | 0.2360 | 6.862  | 13.460 | 10.314 | 22.650 | 10.257 |
| 14 | 0.2370 | 9.076  | 17.661 | 16.556 | 29.388 | 12.554 |
| 14 | 0.2380 | 16.072 | 24.573 | 16.618 | 33.517 | 12.154 |
| 14 | 0.2390 | 17.782 | 19.327 | 19.268 | 30.826 | 7.912  |
| 14 | 0.2400 | 11.213 | 10.375 | 12.869 | 9.006  | 18.880 |
| 14 | 0.2410 | 11.394 | 20.054 | 18.523 | 22.992 | 38.637 |
| 14 | 0.2420 | 14.207 | 18.899 | 14.897 | 26.389 | 12.965 |
| 14 | 0.2430 | 14.222 | 18.935 | 14.913 | 26.379 | 12.976 |
| 14 | 0.2440 | 16.180 | 19.224 | 10.917 | 17.010 | 13.770 |
| 14 | 0.2450 | 16.879 | 28.904 | 17.537 | 25.100 | 10.291 |
| 14 | 0.2460 | 23.635 | 24.323 | 26.430 | 24.518 | 21.449 |
| 14 | 0.2470 | 16.394 | 21.400 | 16.105 | 27.145 | 19.021 |
| 14 | 0.2480 | 11.342 | 17.680 | 12.932 | 33.761 | 17.013 |
| 14 | 0.2490 | 18.195 | 25.464 | 22.909 | 19.489 | 20.761 |
| 14 | 0.2500 | 11.089 | 16.398 | 10.963 | 27.472 | 16.337 |
| 14 | 0.2510 | 21.784 | 28.015 | 23.061 | 22.192 | 18.039 |
| 14 | 0.2520 | 22.039 | 24.905 | 24.540 | 11.081 | 9.387  |
| 14 | 0.2530 | 15.911 | 15.599 | 12.504 | 15.183 | 19.733 |
| 14 | 0.2540 | 12.197 | 18.001 | 18.339 | 13.112 | 12.472 |
| 14 | 0.2550 | 9.731  | 8.657  | 10.009 | 9.839  | 11.302 |
| 14 | 0.2560 | 12.050 | 8.606  | 8.558  | 17.008 | 8.214  |
| 14 | 0.2570 | 21.594 | 14.175 | 17.537 | 18.529 | 14.765 |
| 14 | 0.2580 | 21.592 | 14.212 | 17.560 | 18.499 | 14.715 |
| 14 | 0.2590 | 15.837 | 11.821 | 10.952 | 23.199 | 17.630 |
| 14 | 0.2600 | 8.494  | 16.506 | 9.891  | 21.736 | 7.504  |



|    |        |        |        |        |        |        |
|----|--------|--------|--------|--------|--------|--------|
| 14 | 0.2610 | 7.366  | 11.092 | 10.418 | 12.172 | 6.291  |
| 14 | 0.2620 | 16.584 | 9.097  | 11.644 | 12.797 | 5.634  |
| 14 | 0.2630 | 16.167 | 21.592 | 11.139 | 27.267 | 15.490 |
| 14 | 0.2640 | 21.329 | 12.843 | 15.709 | 17.398 | 18.153 |
| 14 | 0.2650 | 12.335 | 8.232  | 6.811  | 12.691 | 10.878 |
| 14 | 0.2660 | 7.166  | 18.188 | 12.319 | 14.932 | 14.955 |
| 14 | 0.2670 | 29.551 | 20.026 | 22.021 | 22.743 | 22.054 |
| 14 | 0.2680 | 12.697 | 17.328 | 15.527 | 7.909  | 10.558 |
| 14 | 0.2690 | 24.275 | 25.645 | 18.911 | 32.116 | 13.865 |
| 14 | 0.2700 | 23.089 | 16.210 | 19.410 | 20.028 | 11.968 |
| 14 | 0.2710 | 16.403 | 7.117  | 11.193 | 14.302 | 7.617  |
| 14 | 0.2720 | 13.692 | 16.327 | 18.835 | 19.959 | 4.607  |
| 14 | 0.2730 | 15.751 | 21.501 | 16.582 | 21.335 | 9.166  |
| 14 | 0.2740 | 22.667 | 36.271 | 26.023 | 18.274 | 14.754 |
| 14 | 0.2750 | 19.300 | 16.144 | 18.282 | 19.779 | 12.923 |
| 14 | 0.2760 | 21.650 | 26.964 | 27.481 | 25.569 | 14.822 |
| 14 | 0.2770 | 22.952 | 14.907 | 15.800 | 17.259 | 18.052 |
| 14 | 0.2780 | 19.809 | 20.341 | 11.861 | 24.799 | 14.994 |
| 14 | 0.2790 | 12.497 | 12.142 | 16.658 | 14.618 | 15.337 |
| 14 | 0.2800 | 18.433 | 12.506 | 20.011 | 9.532  | 13.910 |
| 14 | 0.2810 | 7.912  | 8.332  | 11.195 | 13.787 | 11.847 |
| 14 | 0.2820 | 12.051 | 8.344  | 12.676 | 7.153  | 17.588 |
| 14 | 0.2830 | 13.974 | 14.001 | 13.951 | 15.894 | 13.316 |
| 14 | 0.2840 | 12.295 | 5.578  | 8.481  | 11.539 | 19.392 |
| 14 | 0.2850 | 19.767 | 13.079 | 15.511 | 8.376  | 10.786 |
| 14 | 0.2860 | 11.442 | 12.937 | 11.935 | 14.697 | 14.126 |
| 14 | 0.2870 | 11.892 | 14.194 | 6.858  | 28.516 | 22.742 |
| 14 | 0.2880 | 7.192  | 16.065 | 15.120 | 19.861 | 14.419 |
| 14 | 0.2890 | 8.597  | 11.102 | 7.209  | 15.748 | 14.924 |
| 14 | 0.2900 | 12.790 | 14.113 | 11.229 | 12.343 | 25.044 |
| 14 | 0.2910 | 11.562 | 17.325 | 12.971 | 23.267 | 23.359 |
| 14 | 0.2920 | 26.070 | 27.085 | 17.980 | 21.316 | 17.623 |
| 14 | 0.2930 | 18.003 | 14.031 | 16.514 | 10.368 | 17.097 |
| 14 | 0.2940 | 20.456 | 13.056 | 25.211 | 14.620 | 11.402 |
| 14 | 0.2950 | 14.023 | 13.737 | 15.949 | 18.225 | 14.767 |
| 14 | 0.2960 | 12.568 | 12.298 | 17.137 | 9.912  | 7.561  |
| 14 | 0.2970 | 7.849  | 9.981  | 11.849 | 11.225 | 15.771 |
| 14 | 0.2980 | 15.015 | 7.878  | 6.902  | 12.427 | 12.199 |
| 14 | 0.2990 | 14.887 | 7.826  | 6.837  | 12.475 | 12.023 |
| 14 | 0.3000 | 9.424  | 6.344  | 7.263  | 16.619 | 8.590  |
| 14 | 0.3010 | 11.909 | 11.402 | 16.964 | 15.573 | 3.209  |
| 14 | 0.3020 | 24.628 | 15.985 | 22.613 | 18.783 | 12.462 |
| 14 | 0.3030 | 16.945 | 9.001  | 11.734 | 14.951 | 19.047 |
| 14 | 0.3040 | 19.497 | 14.153 | 18.616 | 24.629 | 15.747 |
| 14 | 0.3050 | 5.308  | 8.431  | 5.794  | 14.774 | 20.097 |
| 14 | 0.3060 | 9.524  | 7.705  | 8.571  | 15.926 | 12.499 |
| 14 | 0.3070 | 13.434 | 10.648 | 13.500 | 9.944  | 6.755  |
| 14 | 0.3080 | 20.959 | 19.366 | 19.574 | 14.434 | 13.703 |
| 14 | 0.3090 | 14.776 | 16.233 | 17.986 | 10.292 | 14.458 |
| 14 | 0.3100 | 15.108 | 15.880 | 14.251 | 10.764 | 22.668 |

|    |        |        |        |        |        |        |
|----|--------|--------|--------|--------|--------|--------|
| 14 | 0.3110 | 19.663 | 27.462 | 16.563 | 11.605 | 22.364 |
| 14 | 0.3120 | 27.432 | 34.263 | 25.224 | 18.303 | 12.817 |
| 14 | 0.3130 | 11.711 | 24.003 | 22.302 | 21.360 | 13.661 |
| 14 | 0.3140 | 15.739 | 17.564 | 16.467 | 25.977 | 15.274 |
| 14 | 0.3150 | 18.460 | 19.537 | 11.854 | 19.976 | 11.277 |
| 14 | 0.3160 | 7.385  | 8.659  | 6.426  | 5.578  | 13.789 |
| 14 | 0.3170 | 3.794  | 7.052  | 6.937  | 8.220  | 6.568  |
| 14 | 0.3180 | 23.546 | 19.042 | 22.316 | 28.349 | 16.288 |
| 14 | 0.3190 | 21.355 | 31.545 | 31.159 | 28.648 | 21.867 |
| 14 | 0.3200 | 21.356 | 31.569 | 31.110 | 28.677 | 21.860 |
| 14 | 0.3210 | 17.673 | 25.155 | 16.725 | 29.831 | 26.064 |
| 14 | 0.3220 | 16.496 | 28.194 | 19.923 | 32.241 | 15.443 |
| 14 | 0.3230 | 14.276 | 21.474 | 13.773 | 29.369 | 16.584 |
| 14 | 0.3240 | 15.726 | 15.201 | 14.666 | 22.992 | 27.041 |
| 14 | 0.3250 | 16.561 | 11.590 | 13.446 | 18.403 | 10.495 |
| 14 | 0.3260 | 3.691  | 3.773  | 1.097  | 10.702 | 4.646  |
| 14 | 0.3270 | 10.297 | 18.626 | 14.415 | 11.338 | 19.617 |
| 14 | 0.3280 | 17.262 | 19.587 | 17.447 | 18.334 | 22.094 |
| 14 | 0.3290 | 24.043 | 26.137 | 14.197 | 23.944 | 19.886 |
| 14 | 0.3300 | 9.415  | 16.896 | 10.001 | 20.204 | 12.271 |
| 14 | 0.3310 | 5.187  | 13.042 | 7.500  | 30.658 | 12.566 |
| 14 | 0.3320 | 8.306  | 8.514  | 10.523 | 9.500  | 7.857  |
| 14 | 0.3330 | 6.559  | 7.347  | 5.496  | 6.680  | 7.495  |
| 14 | 0.3340 | 11.390 | 10.706 | 8.670  | 9.892  | 14.675 |
| 14 | 0.3350 | 20.439 | 18.746 | 11.360 | 11.112 | 28.363 |
| 14 | 0.3360 | 12.780 | 27.566 | 14.452 | 34.892 | 14.963 |
| 14 | 0.3370 | 13.320 | 15.733 | 14.801 | 10.606 | 27.462 |
| 14 | 0.3380 | 3.903  | 3.382  | 3.031  | 11.402 | 25.476 |
| 14 | 0.3390 | 18.259 | 17.365 | 14.296 | 4.101  | 20.790 |
| 14 | 0.3400 | 23.506 | 31.187 | 19.276 | 16.518 | 12.731 |
| 14 | 0.3410 | 18.479 | 17.992 | 12.955 | 15.588 | 22.711 |
| 14 | 0.3420 | 5.215  | 6.875  | 3.406  | 12.851 | 8.633  |
| 14 | 0.3430 | 12.327 | 14.191 | 4.366  | 16.318 | 12.682 |
| 14 | 0.3440 | 12.330 | 14.274 | 4.321  | 16.515 | 12.542 |
| 14 | 0.3450 | 12.922 | 14.524 | 8.352  | 15.237 | 11.616 |
| 14 | 0.3460 | 13.903 | 17.541 | 14.177 | 18.529 | 25.695 |
| 14 | 0.3470 | 14.168 | 23.496 | 17.414 | 24.103 | 16.707 |
| 14 | 0.3480 | 14.256 | 23.437 | 17.523 | 24.092 | 16.615 |
| 14 | 0.3490 | 11.863 | 10.183 | 12.054 | 13.572 | 23.190 |
| 14 | 0.3500 | 26.303 | 22.579 | 22.022 | 25.891 | 16.321 |
| 14 | 0.3510 | 14.118 | 12.932 | 16.281 | 14.677 | 7.836  |
| 14 | 0.3520 | 16.946 | 15.983 | 15.833 | 12.335 | 14.523 |
| 14 | 0.3530 | 17.234 | 14.621 | 18.129 | 9.107  | 29.086 |
| 14 | 0.3540 | 19.309 | 21.501 | 20.220 | 18.467 | 12.108 |
| 14 | 0.3550 | 23.655 | 20.430 | 25.614 | 18.670 | 12.574 |
| 14 | 0.3560 | 29.845 | 23.837 | 29.761 | 14.515 | 26.551 |
| 14 | 0.3570 | 20.154 | 13.215 | 17.835 | 7.587  | 6.607  |
| 14 | 0.3580 | 7.773  | 9.138  | 10.108 | 11.113 | 9.268  |
| 14 | 0.3590 | 18.544 | 27.640 | 16.838 | 29.201 | 23.998 |
| 14 | 0.3600 | 18.397 | 20.058 | 14.073 | 25.200 | 5.363  |

|    |        |        |        |        |        |        |
|----|--------|--------|--------|--------|--------|--------|
| 14 | 0.3610 | 24.327 | 17.514 | 17.885 | 12.787 | 32.540 |
| 14 | 0.3620 | 20.272 | 14.958 | 14.783 | 15.595 | 29.457 |
| 14 | 0.3630 | 15.394 | 21.294 | 13.641 | 22.173 | 18.342 |
| 14 | 0.3640 | 9.618  | 11.449 | 12.584 | 22.289 | 15.444 |
| 14 | 0.3650 | 11.014 | 12.296 | 11.218 | 11.792 | 17.928 |
| 14 | 0.3660 | 8.186  | 11.033 | 12.940 | 11.889 | 14.505 |
| 14 | 0.3670 | 25.405 | 36.528 | 26.413 | 20.519 | 22.277 |
| 14 | 0.3680 | 9.170  | 22.844 | 14.191 | 17.456 | 8.406  |
| 14 | 0.3690 | 14.136 | 21.087 | 21.908 | 16.055 | 6.918  |
| 14 | 0.3700 | 14.319 | 21.209 | 19.668 | 18.103 | 6.459  |
| 14 | 0.3710 | 19.883 | 15.053 | 17.123 | 11.319 | 9.158  |
| 14 | 0.3720 | 22.582 | 22.326 | 21.143 | 14.948 | 9.583  |
| 14 | 0.3730 | 16.923 | 15.038 | 17.899 | 15.889 | 18.417 |
| 14 | 0.3740 | 17.514 | 15.935 | 15.877 | 13.726 | 24.307 |
| 14 | 0.3750 | 7.979  | 7.376  | 6.929  | 13.633 | 22.063 |
| 14 | 0.3760 | 13.180 | 20.940 | 19.225 | 23.208 | 6.986  |
| 14 | 0.3770 | 20.769 | 28.282 | 24.872 | 19.979 | 15.432 |
| 14 | 0.3780 | 22.088 | 22.739 | 22.058 | 18.055 | 15.076 |
| 14 | 0.3790 | 15.868 | 25.576 | 18.975 | 22.577 | 6.764  |
| 14 | 0.3800 | 20.024 | 13.813 | 15.147 | 13.090 | 12.116 |
| 14 | 0.3810 | 12.130 | 8.431  | 8.185  | 10.635 | 17.912 |
| 14 | 0.3820 | 16.086 | 23.612 | 11.191 | 20.319 | 10.955 |
| 14 | 0.3830 | 28.644 | 16.667 | 23.961 | 11.010 | 16.273 |
| 14 | 0.3840 | 19.453 | 23.916 | 17.960 | 19.437 | 10.872 |
| 14 | 0.3850 | 17.332 | 18.475 | 14.041 | 15.557 | 11.041 |
| 14 | 0.3860 | 17.357 | 18.559 | 14.080 | 15.605 | 11.034 |
| 14 | 0.3870 | 18.685 | 17.598 | 10.867 | 17.045 | 21.731 |
| 14 | 0.3880 | 27.223 | 18.057 | 17.631 | 14.136 | 17.714 |
| 14 | 0.3890 | 12.027 | 12.327 | 12.000 | 23.569 | 12.519 |
| 14 | 0.3900 | 16.997 | 18.622 | 18.375 | 24.121 | 18.374 |
| 14 | 0.3910 | 22.821 | 27.588 | 23.086 | 14.527 | 11.183 |
| 14 | 0.3920 | 16.549 | 14.104 | 13.122 | 12.390 | 6.096  |
| 14 | 0.3930 | 25.495 | 17.566 | 25.696 | 8.179  | 16.085 |
| 14 | 0.3940 | 15.299 | 6.417  | 12.441 | 12.904 | 14.083 |
| 14 | 0.3950 | 6.269  | 8.211  | 8.678  | 7.383  | 16.841 |
| 14 | 0.3960 | 8.257  | 7.760  | 5.541  | 21.385 | 30.689 |
| 14 | 0.3970 | 18.510 | 13.801 | 13.616 | 19.523 | 33.077 |
| 14 | 0.3980 | 21.804 | 17.670 | 21.032 | 16.398 | 13.137 |
| 14 | 0.3990 | 11.996 | 11.057 | 10.687 | 11.087 | 12.579 |
| 14 | 0.4000 | 8.797  | 9.158  | 10.107 | 6.459  | 14.518 |
| 14 | 0.4010 | 13.535 | 16.183 | 14.150 | 15.464 | 12.894 |
| 14 | 0.4020 | 6.098  | 5.139  | 7.833  | 6.274  | 4.613  |
| 14 | 0.4030 | 18.622 | 10.207 | 13.448 | 7.959  | 18.625 |
| 14 | 0.4040 | 14.815 | 13.714 | 13.316 | 7.865  | 21.298 |
| 14 | 0.4050 | 9.659  | 16.316 | 18.404 | 12.106 | 14.022 |
| 14 | 0.4060 | 12.619 | 14.285 | 18.399 | 5.305  | 10.339 |
| 14 | 0.4070 | 12.094 | 15.588 | 17.198 | 8.078  | 11.723 |
| 14 | 0.4080 | 8.104  | 13.053 | 15.181 | 12.232 | 31.602 |
| 14 | 0.4090 | 12.206 | 14.751 | 15.422 | 13.565 | 16.812 |
| 14 | 0.4100 | 12.581 | 11.005 | 18.249 | 16.969 | 19.369 |

|    |        |        |        |        |        |        |
|----|--------|--------|--------|--------|--------|--------|
| 14 | 0.4110 | 11.024 | 8.303  | 10.707 | 18.341 | 16.077 |
| 14 | 0.4120 | 13.694 | 8.873  | 12.707 | 11.182 | 13.232 |
| 14 | 0.4130 | 19.428 | 13.344 | 17.936 | 21.609 | 15.743 |
| 14 | 0.4140 | 7.444  | 7.047  | 9.484  | 3.475  | 9.345  |
| 14 | 0.4150 | 14.568 | 16.654 | 18.202 | 21.447 | 18.386 |
| 14 | 0.4160 | 9.303  | 5.570  | 7.183  | 10.033 | 17.588 |
| 14 | 0.4170 | 22.605 | 11.453 | 14.730 | 16.046 | 15.933 |
| 14 | 0.4180 | 16.996 | 10.867 | 9.615  | 8.730  | 14.728 |
| 14 | 0.4190 | 16.924 | 10.997 | 9.700  | 8.742  | 14.790 |
| 14 | 0.4200 | 7.570  | 8.009  | 6.478  | 7.149  | 4.210  |
| 14 | 0.4210 | 15.513 | 10.889 | 12.963 | 19.086 | 24.120 |
| 14 | 0.4220 | 13.064 | 11.720 | 10.677 | 12.864 | 10.681 |
| 14 | 0.4230 | 6.830  | 9.361  | 8.134  | 8.848  | 9.533  |
| 14 | 0.4240 | 13.591 | 8.772  | 10.646 | 15.244 | 6.576  |
| 14 | 0.4250 | 13.507 | 10.149 | 9.039  | 20.930 | 16.514 |
| 14 | 0.4260 | 14.767 | 10.903 | 11.053 | 19.494 | 17.039 |
| 14 | 0.4270 | 5.945  | 11.755 | 7.143  | 15.542 | 14.332 |
| 14 | 0.4280 | 18.189 | 15.675 | 13.913 | 19.946 | 19.070 |
| 14 | 0.4290 | 15.257 | 19.019 | 10.580 | 17.715 | 22.229 |
| 14 | 0.4300 | 7.585  | 12.351 | 7.803  | 11.386 | 11.651 |
| 14 | 0.4310 | 17.450 | 8.423  | 10.006 | 14.935 | 21.541 |
| 14 | 0.4320 | 15.283 | 16.242 | 15.190 | 13.264 | 12.724 |
| 14 | 0.4330 | 7.785  | 9.112  | 6.382  | 11.653 | 11.384 |
| 14 | 0.4340 | 13.855 | 15.541 | 11.501 | 7.258  | 16.008 |
| 14 | 0.4350 | 19.910 | 13.010 | 10.953 | 10.167 | 31.578 |
| 14 | 0.4360 | 22.425 | 13.775 | 15.744 | 23.395 | 19.001 |
| 14 | 0.4370 | 18.186 | 11.111 | 14.074 | 13.703 | 17.943 |
| 14 | 0.4380 | 16.986 | 11.419 | 12.229 | 17.091 | 23.949 |
| 14 | 0.4390 | 11.186 | 19.567 | 11.314 | 11.567 | 9.070  |
| 14 | 0.4400 | 5.878  | 16.822 | 9.662  | 14.979 | 18.098 |
| 14 | 0.4410 | 11.218 | 10.072 | 11.145 | 13.781 | 19.310 |
| 14 | 0.4420 | 12.559 | 12.354 | 11.727 | 16.115 | 7.225  |
| 14 | 0.4430 | 21.434 | 24.774 | 18.191 | 26.189 | 9.860  |
| 14 | 0.4440 | 13.288 | 13.524 | 11.135 | 9.801  | 10.185 |
| 14 | 0.4450 | 20.302 | 13.519 | 13.706 | 12.333 | 6.557  |
| 14 | 0.4460 | 26.620 | 22.434 | 20.191 | 9.888  | 8.260  |
| 14 | 0.4470 | 26.659 | 22.364 | 20.216 | 9.759  | 8.144  |
| 14 | 0.4480 | 8.041  | 14.561 | 7.748  | 22.759 | 20.436 |
| 14 | 0.4490 | 5.853  | 10.941 | 10.236 | 17.245 | 10.675 |
| 14 | 0.4500 | 5.931  | 6.812  | 4.966  | 17.359 | 11.365 |
| 14 | 0.4510 | 8.583  | 8.432  | 7.604  | 16.090 | 21.092 |
| 14 | 0.4520 | 10.985 | 15.013 | 7.152  | 17.957 | 23.252 |
| 14 | 0.4530 | 16.168 | 19.025 | 15.890 | 17.721 | 13.390 |
| 14 | 0.4540 | 15.907 | 21.549 | 18.956 | 20.875 | 13.498 |
| 14 | 0.4550 | 19.599 | 15.531 | 20.458 | 9.853  | 6.208  |
| 14 | 0.4560 | 22.803 | 19.470 | 20.553 | 22.864 | 13.699 |
| 14 | 0.4570 | 16.713 | 20.867 | 11.123 | 9.076  | 11.097 |
| 14 | 0.4580 | 17.776 | 22.022 | 11.851 | 9.015  | 11.837 |
| 14 | 0.4590 | 19.628 | 19.407 | 12.838 | 15.876 | 20.580 |
| 14 | 0.4600 | 14.616 | 16.953 | 15.427 | 14.947 | 15.489 |

|    |        |        |        |        |        |        |
|----|--------|--------|--------|--------|--------|--------|
| 14 | 0.4610 | 18.437 | 17.507 | 19.659 | 15.704 | 12.312 |
| 14 | 0.4620 | 25.607 | 19.841 | 23.833 | 7.745  | 11.875 |
| 14 | 0.4630 | 19.480 | 28.632 | 24.148 | 22.621 | 20.950 |
| 14 | 0.4640 | 22.422 | 27.001 | 27.133 | 12.445 | 14.757 |
| 14 | 0.4650 | 22.123 | 16.820 | 16.110 | 17.619 | 15.901 |
| 14 | 0.4660 | 17.429 | 19.651 | 14.182 | 18.172 | 15.446 |
| 14 | 0.4670 | 9.965  | 11.717 | 9.361  | 15.345 | 16.349 |
| 14 | 0.4680 | 25.006 | 23.924 | 16.603 | 12.006 | 12.925 |
| 14 | 0.4690 | 20.964 | 25.868 | 17.739 | 10.752 | 16.245 |
| 14 | 0.4700 | 29.186 | 31.793 | 21.468 | 19.114 | 20.172 |
| 14 | 0.4710 | 18.505 | 26.911 | 20.729 | 18.451 | 13.163 |
| 14 | 0.4720 | 16.947 | 27.467 | 15.687 | 19.075 | 13.792 |
| 14 | 0.4730 | 5.631  | 9.693  | 5.687  | 22.331 | 16.889 |
| 14 | 0.4740 | 12.307 | 10.981 | 8.700  | 13.849 | 7.967  |
| 14 | 0.4750 | 11.981 | 5.332  | 7.482  | 9.632  | 8.226  |
| 14 | 0.4760 | 14.406 | 8.878  | 10.454 | 5.750  | 13.677 |
| 14 | 0.4770 | 5.266  | 9.701  | 5.148  | 7.591  | 10.374 |
| 14 | 0.4780 | 7.270  | 8.928  | 6.552  | 5.150  | 11.353 |
| 14 | 0.4790 | 21.809 | 23.070 | 23.978 | 12.971 | 10.904 |
| 14 | 0.4800 | 19.942 | 25.942 | 23.512 | 14.528 | 9.294  |
| 14 | 0.4810 | 19.189 | 25.192 | 23.435 | 16.295 | 18.958 |
| 14 | 0.4820 | 15.208 | 19.460 | 18.116 | 11.419 | 19.181 |
| 14 | 0.4830 | 14.717 | 22.617 | 13.731 | 10.813 | 16.966 |
| 14 | 0.4840 | 20.054 | 15.310 | 18.153 | 9.955  | 13.841 |
| 14 | 0.4850 | 6.500  | 4.209  | 5.710  | 6.060  | 10.053 |
| 14 | 0.4860 | 13.048 | 16.433 | 12.965 | 14.269 | 7.192  |
| 14 | 0.4870 | 21.380 | 25.295 | 21.956 | 16.346 | 12.820 |
| 14 | 0.4880 | 19.506 | 22.071 | 14.480 | 23.770 | 25.172 |
| 14 | 0.4890 | 13.477 | 11.926 | 11.142 | 15.292 | 17.358 |
| 14 | 0.4900 | 17.176 | 20.019 | 23.318 | 8.945  | 11.567 |
| 14 | 0.4910 | 21.196 | 18.790 | 22.755 | 6.639  | 16.323 |
| 14 | 0.4920 | 21.540 | 19.583 | 23.270 | 13.412 | 20.132 |
| 14 | 0.4930 | 17.113 | 11.696 | 19.178 | 19.223 | 19.182 |
| 14 | 0.4940 | 7.745  | 13.332 | 13.545 | 12.509 | 9.935  |
| 14 | 0.4950 | 19.208 | 14.975 | 22.663 | 5.958  | 9.765  |
| 14 | 0.4960 | 17.192 | 14.288 | 18.611 | 7.895  | 14.485 |
| 14 | 0.4970 | 18.853 | 18.567 | 18.982 | 17.862 | 9.626  |
| 14 | 0.4980 | 15.529 | 19.919 | 24.147 | 16.219 | 18.077 |
| 14 | 0.4990 | 13.135 | 13.419 | 12.473 | 19.536 | 14.879 |
| 14 | 0.5000 | 15.814 | 17.009 | 16.741 | 12.612 | 21.990 |
| 14 | 0.5010 | 9.050  | 8.766  | 11.137 | 15.223 | 7.776  |
| 14 | 0.5020 | 11.096 | 11.894 | 14.130 | 12.483 | 13.724 |
| 14 | 0.5030 | 15.125 | 16.573 | 10.010 | 14.044 | 12.950 |
| 14 | 0.5040 | 14.774 | 11.020 | 14.223 | 17.004 | 9.216  |
| 14 | 0.5050 | 13.807 | 11.007 | 11.874 | 16.095 | 21.720 |
| 14 | 0.5060 | 16.959 | 22.660 | 15.461 | 6.787  | 16.075 |
| 14 | 0.5070 | 19.378 | 21.198 | 16.647 | 11.739 | 15.631 |
| 14 | 0.5080 | 16.920 | 25.056 | 19.693 | 19.469 | 15.665 |
| 14 | 0.5090 | 6.518  | 10.520 | 6.710  | 17.635 | 23.322 |
| 14 | 0.5100 | 18.950 | 14.666 | 16.646 | 18.540 | 17.740 |

|    |        |        |        |        |        |        |
|----|--------|--------|--------|--------|--------|--------|
| 14 | 0.5110 | 20.852 | 19.103 | 15.295 | 12.118 | 14.466 |
| 14 | 0.5120 | 17.745 | 13.107 | 14.084 | 14.193 | 24.552 |
| 14 | 0.5130 | 19.285 | 19.797 | 13.711 | 17.262 | 22.276 |
| 14 | 0.5140 | 13.944 | 13.970 | 19.528 | 16.702 | 18.775 |
| 14 | 0.5150 | 15.833 | 12.058 | 16.933 | 16.603 | 19.253 |
| 14 | 0.5160 | 17.939 | 20.624 | 22.620 | 26.710 | 16.227 |
| 14 | 0.5170 | 16.039 | 17.604 | 18.158 | 30.109 | 14.250 |
| 14 | 0.5180 | 9.389  | 20.523 | 11.642 | 23.309 | 6.531  |
| 14 | 0.5190 | 23.064 | 29.788 | 19.796 | 17.437 | 7.685  |
| 14 | 0.5200 | 21.265 | 23.093 | 18.817 | 18.179 | 12.001 |
| 14 | 0.5210 | 16.520 | 21.390 | 15.910 | 23.246 | 16.162 |
| 14 | 0.5220 | 19.796 | 25.722 | 18.919 | 13.299 | 13.682 |
| 14 | 0.5230 | 12.011 | 13.600 | 14.510 | 20.522 | 12.982 |
| 14 | 0.5240 | 15.871 | 11.216 | 15.032 | 17.449 | 11.645 |
| 14 | 0.5250 | 30.279 | 15.901 | 31.865 | 23.153 | 9.211  |
| 14 | 0.5260 | 24.432 | 16.822 | 21.001 | 23.059 | 7.037  |
| 14 | 0.5270 | 21.609 | 14.508 | 17.490 | 10.041 | 19.830 |
| 14 | 0.5280 | 14.357 | 12.374 | 13.352 | 13.007 | 19.291 |
| 14 | 0.5290 | 11.249 | 14.350 | 11.692 | 17.262 | 10.849 |
| 14 | 0.5300 | 11.203 | 6.123  | 11.454 | 16.308 | 7.243  |
| 14 | 0.5310 | 24.035 | 23.829 | 19.360 | 18.949 | 20.819 |
| 14 | 0.5320 | 21.074 | 20.925 | 17.376 | 18.638 | 22.822 |
| 14 | 0.5330 | 6.317  | 10.166 | 6.118  | 18.355 | 18.779 |
| 14 | 0.5340 | 7.283  | 7.970  | 8.278  | 14.944 | 14.932 |
| 14 | 0.5350 | 24.764 | 22.756 | 17.233 | 19.894 | 16.543 |
| 14 | 0.5360 | 7.342  | 9.522  | 12.594 | 10.137 | 14.178 |
| 14 | 0.5370 | 11.906 | 16.166 | 17.671 | 9.578  | 8.254  |
| 14 | 0.5380 | 26.013 | 23.767 | 22.188 | 13.392 | 15.136 |
| 14 | 0.5390 | 6.906  | 14.609 | 14.095 | 11.486 | 12.340 |
| 14 | 0.5400 | 11.532 | 13.586 | 14.164 | 13.570 | 21.134 |
| 14 | 0.5410 | 13.222 | 12.961 | 15.371 | 18.592 | 18.674 |
| 14 | 0.5420 | 12.627 | 11.935 | 14.856 | 17.969 | 18.728 |
| 14 | 0.5430 | 10.526 | 16.025 | 14.388 | 19.471 | 12.075 |
| 14 | 0.5440 | 17.968 | 13.655 | 11.014 | 12.465 | 16.376 |
| 14 | 0.5450 | 5.668  | 10.367 | 8.449  | 16.849 | 16.520 |
| 14 | 0.5460 | 13.364 | 18.693 | 9.832  | 14.852 | 17.340 |
| 14 | 0.5470 | 25.466 | 27.265 | 22.661 | 16.199 | 19.897 |
| 14 | 0.5480 | 8.028  | 12.728 | 8.879  | 17.123 | 11.161 |
| 14 | 0.5490 | 8.367  | 16.260 | 10.275 | 14.611 | 8.052  |
| 14 | 0.5500 | 8.913  | 16.335 | 11.824 | 20.460 | 18.976 |
| 14 | 0.5510 | 16.613 | 22.643 | 17.789 | 20.303 | 21.589 |
| 14 | 0.5520 | 18.935 | 16.757 | 17.206 | 12.476 | 12.365 |
| 14 | 0.5530 | 11.382 | 15.529 | 10.354 | 13.561 | 14.625 |
| 14 | 0.5540 | 16.715 | 20.048 | 12.583 | 12.832 | 17.953 |
| 14 | 0.5550 | 20.449 | 29.365 | 23.854 | 21.506 | 17.432 |
| 14 | 0.5560 | 21.466 | 30.565 | 24.693 | 22.171 | 16.721 |
| 14 | 0.5570 | 16.445 | 26.468 | 19.021 | 16.448 | 15.785 |
| 14 | 0.5580 | 7.544  | 13.313 | 9.123  | 6.546  | 7.354  |
| 14 | 0.5590 | 11.674 | 14.702 | 14.371 | 15.284 | 14.136 |
| 14 | 0.5600 | 22.544 | 19.444 | 19.379 | 19.076 | 16.275 |

|    |        |        |        |        |        |        |
|----|--------|--------|--------|--------|--------|--------|
| 14 | 0.5610 | 10.412 | 11.446 | 11.479 | 17.995 | 21.697 |
| 14 | 0.5620 | 11.236 | 16.578 | 15.236 | 8.651  | 9.596  |
| 14 | 0.5630 | 9.634  | 18.309 | 12.783 | 20.438 | 7.239  |
| 14 | 0.5640 | 12.849 | 20.113 | 12.807 | 21.110 | 20.276 |
| 14 | 0.5650 | 19.522 | 28.216 | 19.214 | 24.374 | 22.911 |
| 14 | 0.5660 | 15.631 | 19.647 | 14.826 | 19.332 | 15.991 |
| 14 | 0.5670 | 9.815  | 14.317 | 13.110 | 6.001  | 7.490  |
| 14 | 0.5680 | 22.658 | 31.310 | 15.683 | 16.684 | 15.111 |
| 14 | 0.5690 | 17.718 | 26.736 | 21.677 | 20.537 | 22.465 |
| 14 | 0.5700 | 8.480  | 16.919 | 14.156 | 21.003 | 20.688 |
| 14 | 0.5710 | 6.323  | 10.435 | 10.061 | 21.126 | 14.238 |
| 14 | 0.5720 | 9.196  | 11.928 | 9.689  | 26.415 | 16.975 |
| 14 | 0.5730 | 9.186  | 11.077 | 9.869  | 15.823 | 21.656 |
| 14 | 0.5740 | 10.773 | 11.551 | 9.172  | 13.872 | 17.044 |
| 14 | 0.5750 | 25.642 | 38.008 | 28.383 | 20.627 | 12.072 |
| 14 | 0.5760 | 14.660 | 21.502 | 18.902 | 13.455 | 7.740  |
| 14 | 0.5770 | 12.355 | 21.791 | 20.873 | 16.647 | 6.649  |
| 14 | 0.5780 | 20.258 | 26.261 | 23.694 | 11.909 | 8.031  |
| 14 | 0.5790 | 14.950 | 24.457 | 20.591 | 11.167 | 12.624 |
| 14 | 0.5800 | 8.233  | 16.025 | 14.719 | 15.464 | 16.508 |
| 14 | 0.5810 | 8.083  | 15.003 | 14.560 | 20.624 | 17.549 |
| 14 | 0.5820 | 29.290 | 31.245 | 25.231 | 19.498 | 12.921 |
| 14 | 0.5830 | 20.295 | 9.315  | 11.149 | 16.826 | 9.281  |
| 14 | 0.5840 | 17.194 | 22.772 | 13.448 | 16.363 | 11.979 |
| 14 | 0.5850 | 10.149 | 17.987 | 13.829 | 8.694  | 12.140 |
| 14 | 0.5860 | 5.858  | 11.783 | 6.610  | 9.167  | 11.723 |
| 14 | 0.5870 | 8.822  | 13.255 | 7.319  | 10.197 | 11.345 |
| 14 | 0.5880 | 14.904 | 15.454 | 12.487 | 6.749  | 12.307 |
| 14 | 0.5890 | 17.881 | 17.989 | 14.178 | 5.593  | 9.744  |
| 14 | 0.5900 | 19.477 | 23.038 | 16.527 | 3.539  | 6.263  |
| 14 | 0.5910 | 23.014 | 27.029 | 20.967 | 12.778 | 12.724 |
| 14 | 0.5920 | 17.565 | 15.897 | 12.329 | 13.366 | 14.753 |
| 14 | 0.5930 | 14.241 | 6.706  | 10.925 | 14.242 | 12.622 |
| 14 | 0.5940 | 10.353 | 14.381 | 9.424  | 25.900 | 8.644  |
| 14 | 0.5950 | 25.828 | 22.291 | 19.995 | 12.805 | 11.504 |
| 14 | 0.5960 | 14.863 | 21.615 | 16.239 | 20.359 | 4.680  |
| 14 | 0.5970 | 21.007 | 24.718 | 19.387 | 23.675 | 11.007 |
| 14 | 0.5980 | 16.922 | 11.020 | 12.663 | 12.336 | 19.173 |
| 14 | 0.5990 | 15.486 | 12.564 | 11.567 | 17.256 | 16.606 |
| 14 | 0.6000 | 20.965 | 18.074 | 12.527 | 13.809 | 17.743 |
| 14 | 0.6010 | 14.842 | 16.409 | 14.701 | 11.668 | 9.944  |
| 14 | 0.6020 | 12.355 | 15.403 | 10.901 | 18.478 | 15.986 |
| 14 | 0.6030 | 19.240 | 17.982 | 15.532 | 12.724 | 10.378 |
| 14 | 0.6040 | 17.660 | 10.504 | 15.046 | 18.290 | 15.298 |
| 14 | 0.6050 | 10.591 | 8.348  | 6.259  | 14.987 | 15.678 |
| 14 | 0.6060 | 9.714  | 11.917 | 6.906  | 13.833 | 14.711 |
| 14 | 0.6070 | 11.570 | 13.288 | 10.213 | 19.722 | 14.610 |
| 14 | 0.6080 | 8.350  | 19.161 | 14.483 | 19.275 | 4.346  |
| 14 | 0.6090 | 8.220  | 16.969 | 13.940 | 14.732 | 8.959  |
| 14 | 0.6100 | 6.497  | 9.263  | 8.784  | 15.410 | 6.869  |

|    |        |        |        |        |        |        |
|----|--------|--------|--------|--------|--------|--------|
| 14 | 0.6110 | 8.650  | 10.171 | 8.834  | 14.557 | 10.909 |
| 14 | 0.6120 | 6.920  | 7.623  | 6.425  | 23.580 | 14.329 |
| 14 | 0.6130 | 16.590 | 18.427 | 14.211 | 20.413 | 16.558 |
| 14 | 0.6140 | 18.825 | 7.001  | 12.165 | 17.058 | 16.092 |
| 14 | 0.6150 | 11.614 | 8.818  | 8.675  | 10.388 | 16.378 |
| 14 | 0.6160 | 14.230 | 13.289 | 12.231 | 7.852  | 8.119  |
| 14 | 0.6170 | 9.261  | 7.067  | 7.414  | 4.265  | 6.429  |
| 14 | 0.6180 | 6.929  | 7.957  | 6.556  | 6.043  | 11.098 |
| 14 | 0.6190 | 6.930  | 7.952  | 6.555  | 6.043  | 11.098 |
| 14 | 0.6200 | 15.458 | 14.329 | 10.411 | 4.304  | 10.046 |
| 14 | 0.6210 | 13.302 | 7.930  | 9.516  | 6.988  | 9.095  |
| 14 | 0.6220 | 10.737 | 5.745  | 6.742  | 3.180  | 8.107  |
| 14 | 0.6230 | 7.815  | 3.841  | 5.124  | 7.134  | 10.824 |
| 14 | 0.6240 | 11.414 | 6.667  | 5.826  | 9.494  | 8.591  |
| 14 | 0.6250 | 11.468 | 11.284 | 9.123  | 8.691  | 5.573  |
| 14 | 0.6260 | 7.104  | 9.191  | 7.656  | 7.291  | 4.003  |
| 14 | 0.6270 | 12.253 | 15.544 | 14.256 | 27.760 | 20.926 |
| 14 | 0.6280 | 20.844 | 13.959 | 16.354 | 20.387 | 16.176 |
| 14 | 0.6290 | 7.428  | 5.969  | 6.163  | 17.081 | 13.910 |
| 14 | 0.6300 | 16.159 | 16.409 | 12.882 | 12.284 | 10.169 |
| 14 | 0.6310 | 15.810 | 19.343 | 13.720 | 10.950 | 11.343 |
| 14 | 0.6320 | 11.752 | 8.648  | 9.918  | 8.234  | 4.076  |
| 14 | 0.6330 | 6.927  | 13.143 | 8.026  | 13.770 | 13.725 |
| 14 | 0.6340 | 10.825 | 12.218 | 10.139 | 9.032  | 8.575  |
| 14 | 0.6350 | 12.247 | 13.633 | 12.731 | 15.644 | 22.556 |
| 14 | 0.6360 | 16.307 | 10.849 | 12.071 | 21.008 | 15.848 |
| 14 | 0.6370 | 9.821  | 12.480 | 11.772 | 12.593 | 7.021  |
| 14 | 0.6380 | 5.749  | 7.774  | 8.968  | 5.418  | 14.085 |
| 14 | 0.6390 | 11.762 | 12.482 | 12.528 | 9.735  | 14.342 |
| 14 | 0.6400 | 11.504 | 9.025  | 11.214 | 8.333  | 19.106 |
| 14 | 0.6410 | 17.018 | 19.931 | 17.346 | 16.187 | 21.682 |
| 14 | 0.6420 | 17.628 | 19.438 | 12.705 | 16.420 | 20.657 |
| 14 | 0.6430 | 12.292 | 11.651 | 9.129  | 11.117 | 18.396 |
| 14 | 0.6440 | 4.882  | 5.449  | 4.483  | 13.282 | 14.715 |
| 14 | 0.6450 | 12.015 | 8.462  | 10.808 | 11.754 | 19.565 |
| 14 | 0.6460 | 15.329 | 8.137  | 9.295  | 11.089 | 24.792 |
| 14 | 0.6470 | 15.467 | 8.386  | 9.370  | 11.173 | 26.155 |
| 14 | 0.6480 | 26.028 | 14.428 | 19.958 | 11.559 | 26.476 |
| 14 | 0.6490 | 15.778 | 19.151 | 14.053 | 25.989 | 24.977 |
| 14 | 0.6500 | 14.742 | 22.936 | 16.401 | 24.476 | 20.970 |
| 14 | 0.6510 | 13.496 | 14.197 | 14.306 | 16.138 | 15.569 |
| 14 | 0.6520 | 6.120  | 6.599  | 4.916  | 9.468  | 9.727  |
| 14 | 0.6530 | 19.135 | 14.771 | 14.848 | 11.264 | 13.425 |
| 14 | 0.6540 | 10.539 | 10.112 | 9.093  | 4.015  | 10.027 |
| 14 | 0.6550 | 10.080 | 10.099 | 8.094  | 13.670 | 13.319 |
| 14 | 0.6560 | 13.374 | 10.078 | 12.154 | 15.637 | 18.728 |
| 14 | 0.6570 | 8.850  | 13.508 | 5.280  | 22.106 | 17.370 |
| 14 | 0.6580 | 8.324  | 9.399  | 5.741  | 4.518  | 6.791  |
| 14 | 0.6590 | 24.419 | 30.574 | 26.621 | 29.674 | 23.252 |
| 14 | 0.6600 | 7.605  | 6.879  | 6.465  | 11.403 | 13.771 |



|    |        |        |        |        |        |        |
|----|--------|--------|--------|--------|--------|--------|
| 14 | 0.6610 | 14.359 | 8.522  | 9.092  | 12.190 | 24.257 |
| 14 | 0.6620 | 4.462  | 2.778  | 5.597  | 7.058  | 15.989 |
| 14 | 0.6630 | 4.639  | 3.675  | 6.603  | 10.561 | 13.127 |
| 14 | 0.6640 | 15.524 | 12.152 | 7.313  | 13.800 | 15.961 |
| 14 | 0.6650 | 9.543  | 7.027  | 7.085  | 9.101  | 14.943 |
| 14 | 0.6660 | 7.895  | 8.157  | 6.443  | 10.797 | 10.966 |
| 14 | 0.6670 | 11.952 | 4.393  | 6.102  | 8.667  | 15.270 |
| 14 | 0.6680 | 7.907  | 11.097 | 6.184  | 23.272 | 19.484 |
| 14 | 0.6690 | 15.357 | 12.025 | 8.934  | 14.437 | 19.502 |
| 14 | 0.6700 | 5.276  | 5.826  | 4.429  | 3.340  | 14.116 |
| 14 | 0.6710 | 3.041  | 3.826  | 1.538  | 5.065  | 9.895  |
| 14 | 0.6720 | 18.584 | 7.580  | 9.290  | 7.861  | 7.991  |
| 14 | 0.6730 | 2.296  | 4.219  | 3.415  | 0.888  | 7.009  |
| 14 | 0.6740 | 1.069  | 2.412  | 2.074  | 0.462  | 1.847  |
| 14 | 0.6750 | 5.735  | 5.116  | 4.943  | 3.232  | 3.738  |
| 14 | 0.6760 | 7.548  | 4.731  | 4.098  | 6.245  | 12.485 |
| 14 | 0.6770 | 12.124 | 7.471  | 6.477  | 7.291  | 20.686 |
| 14 | 0.6780 | 10.821 | 8.457  | 5.034  | 7.135  | 20.360 |
| 14 | 0.6790 | 7.920  | 7.256  | 4.323  | 13.444 | 5.040  |
| 14 | 0.6800 | 8.506  | 10.192 | 12.298 | 19.145 | 10.542 |
| 14 | 0.6810 | 7.859  | 11.374 | 13.275 | 8.239  | 11.246 |
| 14 | 0.6820 | 12.866 | 15.521 | 15.081 | 8.433  | 5.085  |
| 14 | 0.6830 | 21.674 | 17.476 | 17.294 | 16.733 | 6.212  |
| 14 | 0.6840 | 18.962 | 7.821  | 12.643 | 11.641 | 6.583  |
| 14 | 0.6850 | 21.491 | 17.540 | 18.153 | 14.410 | 11.146 |
| 14 | 0.6860 | 14.939 | 17.027 | 15.131 | 16.184 | 15.195 |
| 14 | 0.6870 | 14.902 | 16.995 | 15.085 | 16.182 | 15.141 |
| 14 | 0.6880 | 18.284 | 13.800 | 12.561 | 17.342 | 18.777 |
| 14 | 0.6890 | 6.893  | 12.005 | 7.342  | 17.963 | 13.741 |
| 14 | 0.6900 | 10.507 | 12.577 | 12.264 | 19.418 | 16.065 |
| 14 | 0.6910 | 12.299 | 16.585 | 12.580 | 18.597 | 15.999 |
| 14 | 0.6920 | 17.204 | 15.502 | 13.777 | 13.822 | 21.681 |
| 14 | 0.6930 | 11.973 | 10.045 | 11.232 | 10.366 | 23.383 |
| 14 | 0.6940 | 18.891 | 16.121 | 18.382 | 15.382 | 29.501 |
| 14 | 0.6950 | 7.829  | 8.315  | 5.429  | 18.548 | 14.782 |
| 14 | 0.6960 | 7.014  | 8.190  | 7.634  | 14.512 | 8.210  |
| 14 | 0.6970 | 2.209  | 5.192  | 3.863  | 13.245 | 6.003  |
| 14 | 0.6980 | 6.242  | 10.423 | 6.600  | 14.315 | 6.044  |
| 14 | 0.6990 | 7.631  | 5.873  | 6.465  | 3.302  | 6.772  |
| 14 | 0.7000 | 13.222 | 15.093 | 15.025 | 8.529  | 15.463 |
| 14 | 0.7010 | 11.779 | 14.854 | 13.268 | 15.846 | 14.586 |
| 14 | 0.7020 | 11.666 | 13.334 | 11.130 | 19.419 | 19.686 |
| 14 | 0.7030 | 16.367 | 10.223 | 13.152 | 12.464 | 18.817 |
| 14 | 0.7040 | 24.504 | 23.553 | 18.785 | 20.836 | 29.600 |
| 14 | 0.7050 | 4.422  | 3.761  | 4.620  | 6.087  | 6.297  |
| 14 | 0.7060 | 6.587  | 9.127  | 7.399  | 8.661  | 12.391 |
| 14 | 0.7070 | 15.046 | 10.305 | 13.788 | 6.938  | 12.994 |
| 14 | 0.7080 | 7.822  | 5.500  | 10.952 | 14.147 | 15.320 |
| 14 | 0.7090 | 9.609  | 4.889  | 10.089 | 23.286 | 14.939 |
| 14 | 0.7100 | 6.929  | 6.422  | 11.110 | 9.909  | 18.504 |

|    |        |        |        |        |        |        |
|----|--------|--------|--------|--------|--------|--------|
| 14 | 0.7110 | 4.906  | 6.209  | 5.374  | 12.664 | 15.222 |
| 14 | 0.7120 | 7.089  | 13.538 | 11.645 | 12.362 | 6.353  |
| 14 | 0.7130 | 9.105  | 8.674  | 11.641 | 7.686  | 10.898 |
| 14 | 0.7140 | 12.559 | 12.761 | 12.090 | 17.669 | 29.098 |
| 14 | 0.7150 | 13.977 | 12.577 | 14.451 | 12.597 | 23.302 |
| 14 | 0.7160 | 11.424 | 12.858 | 18.807 | 14.848 | 10.886 |
| 14 | 0.7170 | 12.765 | 12.692 | 13.728 | 11.363 | 17.390 |
| 14 | 0.7180 | 16.722 | 16.261 | 14.524 | 7.222  | 23.327 |
| 14 | 0.7190 | 12.367 | 20.578 | 18.599 | 9.338  | 13.992 |
| 14 | 0.7200 | 5.388  | 9.215  | 9.119  | 8.997  | 10.928 |
| 14 | 0.7210 | 14.359 | 15.576 | 13.248 | 10.521 | 13.748 |
| 14 | 0.7220 | 11.495 | 10.092 | 8.550  | 9.782  | 20.357 |
| 14 | 0.7230 | 10.916 | 9.128  | 12.263 | 15.305 | 18.584 |
| 14 | 0.7240 | 15.248 | 12.162 | 11.353 | 14.844 | 10.589 |
| 14 | 0.7250 | 25.386 | 14.766 | 15.267 | 8.151  | 21.770 |
| 14 | 0.7260 | 18.822 | 17.586 | 12.654 | 10.175 | 17.578 |
| 14 | 0.7270 | 27.829 | 14.625 | 14.369 | 11.128 | 25.007 |
| 14 | 0.7280 | 35.329 | 35.002 | 29.139 | 13.573 | 11.361 |
| 14 | 0.7290 | 24.936 | 27.224 | 21.849 | 10.761 | 20.604 |
| 14 | 0.7300 | 15.766 | 15.501 | 18.172 | 6.462  | 11.523 |
| 14 | 0.7310 | 12.038 | 12.246 | 15.038 | 6.981  | 17.520 |
| 14 | 0.7320 | 13.834 | 12.403 | 15.339 | 12.127 | 17.732 |
| 14 | 0.7330 | 18.032 | 13.286 | 17.230 | 16.177 | 24.554 |
| 14 | 0.7340 | 9.470  | 8.661  | 11.168 | 12.086 | 14.919 |
| 14 | 0.7350 | 9.716  | 11.490 | 9.843  | 10.377 | 14.190 |
| 14 | 0.7360 | 15.196 | 13.889 | 12.410 | 12.829 | 22.768 |
| 14 | 0.7370 | 15.211 | 12.428 | 12.824 | 13.136 | 20.171 |
| 14 | 0.7380 | 12.552 | 12.803 | 11.138 | 6.770  | 7.461  |
| 14 | 0.7390 | 10.636 | 10.393 | 11.170 | 16.492 | 10.347 |
| 14 | 0.7400 | 17.135 | 12.500 | 16.357 | 20.517 | 17.435 |
| 14 | 0.7410 | 18.708 | 15.867 | 20.806 | 15.624 | 12.224 |
| 14 | 0.7420 | 4.427  | 10.157 | 4.986  | 10.208 | 12.575 |
| 14 | 0.7430 | 15.208 | 11.427 | 13.592 | 18.501 | 13.795 |
| 14 | 0.7440 | 18.854 | 11.699 | 19.587 | 13.494 | 12.653 |
| 14 | 0.7450 | 5.710  | 4.767  | 5.143  | 3.488  | 12.440 |
| 14 | 0.7460 | 15.390 | 15.589 | 11.726 | 15.310 | 29.315 |
| 14 | 0.7470 | 9.341  | 11.900 | 8.044  | 14.653 | 21.759 |
| 14 | 0.7480 | 9.586  | 10.342 | 8.158  | 11.803 | 24.002 |
| 14 | 0.7490 | 9.490  | 9.050  | 13.972 | 8.305  | 11.638 |
| 14 | 0.7500 | 2.555  | 5.145  | 7.138  | 7.532  | 20.007 |
| 14 | 0.7510 | 15.413 | 11.901 | 13.542 | 4.503  | 15.573 |
| 14 | 0.7520 | 6.624  | 3.404  | 3.856  | 3.505  | 11.929 |
| 14 | 0.7530 | 2.343  | 3.431  | 4.624  | 10.859 | 7.859  |
| 14 | 0.7540 | 1.451  | 1.318  | 3.444  | 3.236  | 4.415  |
| 14 | 0.7550 | 5.894  | 3.763  | 8.129  | 3.933  | 4.148  |
| 14 | 0.7560 | 14.260 | 13.636 | 12.782 | 11.153 | 11.745 |
| 14 | 0.7570 | 21.571 | 21.944 | 24.172 | 9.635  | 13.158 |
| 14 | 0.7580 | 7.195  | 5.443  | 5.252  | 8.526  | 16.065 |
| 14 | 0.7590 | 21.679 | 15.367 | 14.372 | 13.270 | 16.762 |
| 14 | 0.7600 | 28.036 | 30.043 | 15.188 | 15.440 | 19.142 |

|    |        |        |        |        |        |        |
|----|--------|--------|--------|--------|--------|--------|
| 14 | 0.7610 | 23.025 | 22.092 | 13.257 | 8.904  | 17.067 |
| 14 | 0.7620 | 20.628 | 17.548 | 12.367 | 19.240 | 26.117 |
| 14 | 0.7630 | 14.206 | 11.924 | 9.292  | 21.365 | 27.301 |
| 14 | 0.7640 | 6.206  | 7.646  | 4.659  | 13.767 | 19.547 |
| 14 | 0.7650 | 15.143 | 13.177 | 9.771  | 13.045 | 23.133 |
| 14 | 0.7660 | 17.488 | 13.255 | 15.221 | 14.520 | 12.253 |
| 14 | 0.7670 | 23.174 | 18.547 | 19.316 | 21.168 | 28.703 |
| 14 | 0.7680 | 16.617 | 14.475 | 11.697 | 28.497 | 32.296 |
| 14 | 0.7690 | 14.168 | 16.232 | 18.040 | 18.028 | 25.790 |
| 14 | 0.7700 | 15.080 | 13.227 | 15.373 | 11.128 | 22.293 |
| 14 | 0.7710 | 16.930 | 12.203 | 12.432 | 15.180 | 30.607 |
| 14 | 0.7720 | 10.012 | 3.906  | 3.166  | 12.622 | 24.136 |
| 14 | 0.7730 | 12.073 | 8.627  | 9.895  | 19.047 | 22.134 |
| 14 | 0.7740 | 16.069 | 10.293 | 12.390 | 13.773 | 39.760 |
| 14 | 0.7750 | 11.515 | 17.994 | 10.868 | 22.424 | 33.557 |
| 14 | 0.7760 | 12.428 | 11.945 | 10.653 | 10.085 | 13.425 |
| 14 | 0.7770 | 10.570 | 5.216  | 9.693  | 7.518  | 14.965 |
| 14 | 0.7780 | 10.707 | 12.107 | 15.855 | 13.735 | 28.069 |
| 14 | 0.7790 | 8.940  | 12.144 | 12.425 | 11.040 | 27.072 |
| 14 | 0.7800 | 8.969  | 11.946 | 12.221 | 11.113 | 27.192 |
| 14 | 0.7810 | 12.794 | 12.815 | 17.437 | 14.680 | 25.320 |
| 14 | 0.7820 | 13.220 | 9.393  | 19.345 | 11.708 | 14.308 |
| 14 | 0.7830 | 17.191 | 11.769 | 18.165 | 9.492  | 26.417 |
| 14 | 0.7840 | 10.087 | 5.949  | 13.994 | 19.182 | 12.940 |
| 14 | 0.7850 | 7.349  | 6.843  | 11.281 | 14.024 | 19.409 |
| 14 | 0.7860 | 7.492  | 5.280  | 8.668  | 10.172 | 14.688 |
| 14 | 0.7870 | 9.312  | 11.610 | 12.664 | 17.835 | 21.733 |
| 14 | 0.7880 | 15.737 | 12.565 | 15.534 | 21.725 | 22.913 |
| 14 | 0.7890 | 15.234 | 14.929 | 12.548 | 17.002 | 35.495 |
| 14 | 0.7900 | 9.549  | 8.450  | 7.649  | 15.523 | 22.517 |
| 14 | 0.7910 | 6.594  | 7.108  | 7.451  | 26.771 | 25.416 |
| 14 | 0.7920 | 12.053 | 8.606  | 9.673  | 23.041 | 16.543 |
| 14 | 0.7930 | 28.223 | 20.596 | 19.460 | 17.105 | 23.711 |
| 14 | 0.7940 | 24.739 | 16.993 | 23.452 | 8.726  | 14.171 |
| 14 | 0.7950 | 15.480 | 13.596 | 15.418 | 3.452  | 13.392 |
| 14 | 0.7960 | 20.101 | 10.085 | 13.944 | 12.721 | 21.280 |
| 14 | 0.7970 | 18.757 | 13.024 | 18.216 | 24.894 | 32.992 |
| 14 | 0.7980 | 16.363 | 11.610 | 16.629 | 11.422 | 8.984  |
| 14 | 0.7990 | 8.924  | 9.972  | 8.689  | 22.038 | 16.676 |
| 14 | 0.8000 | 18.748 | 14.107 | 15.260 | 21.507 | 23.661 |
| 14 | 0.8010 | 13.069 | 10.005 | 12.296 | 12.679 | 19.787 |
| 14 | 0.8020 | 25.733 | 17.570 | 17.762 | 7.042  | 17.819 |
| 14 | 0.8030 | 26.373 | 16.081 | 18.287 | 7.024  | 17.250 |
| 14 | 0.8040 | 20.085 | 6.490  | 19.505 | 14.432 | 28.847 |
| 14 | 0.8050 | 10.227 | 8.918  | 11.689 | 14.330 | 34.774 |
| 14 | 0.8060 | 7.644  | 5.955  | 5.801  | 12.769 | 15.791 |
| 14 | 0.8070 | 9.389  | 6.462  | 8.552  | 9.914  | 14.308 |
| 14 | 0.8080 | 9.553  | 8.881  | 14.401 | 9.917  | 10.630 |
| 14 | 0.8090 | 11.580 | 7.965  | 9.053  | 11.269 | 7.110  |
| 14 | 0.8100 | 17.026 | 18.610 | 17.819 | 12.738 | 9.968  |

|    |        |        |        |        |        |        |
|----|--------|--------|--------|--------|--------|--------|
| 14 | 0.8110 | 21.908 | 19.304 | 17.955 | 15.281 | 11.184 |
| 14 | 0.8120 | 11.614 | 10.541 | 12.093 | 11.700 | 9.675  |
| 14 | 0.8130 | 13.645 | 5.978  | 11.622 | 12.198 | 12.136 |
| 14 | 0.8140 | 9.477  | 8.863  | 10.166 | 21.121 | 30.003 |
| 14 | 0.8150 | 10.366 | 7.605  | 11.074 | 11.848 | 14.734 |
| 14 | 0.8160 | 6.807  | 5.553  | 7.067  | 6.872  | 12.793 |
| 14 | 0.8170 | 14.908 | 14.437 | 15.125 | 6.938  | 14.759 |
| 14 | 0.8180 | 10.683 | 8.432  | 8.481  | 9.977  | 24.579 |
| 14 | 0.8190 | 10.661 | 8.883  | 9.509  | 12.953 | 21.471 |
| 14 | 0.8200 | 9.638  | 8.183  | 16.478 | 10.453 | 22.206 |
| 14 | 0.8210 | 9.566  | 11.528 | 12.261 | 22.515 | 17.097 |
| 14 | 0.8220 | 15.422 | 10.141 | 16.090 | 17.749 | 17.681 |
| 14 | 0.8230 | 17.400 | 20.053 | 20.133 | 15.916 | 15.947 |
| 14 | 0.8240 | 10.134 | 13.458 | 15.391 | 20.761 | 15.224 |
| 14 | 0.8250 | 8.863  | 11.359 | 11.679 | 16.862 | 16.573 |
| 14 | 0.8260 | 13.654 | 12.406 | 18.626 | 8.229  | 17.989 |
| 14 | 0.8270 | 10.943 | 13.418 | 12.091 | 22.808 | 20.497 |
| 14 | 0.8280 | 11.202 | 13.370 | 13.210 | 21.774 | 22.967 |
| 14 | 0.8290 | 22.122 | 19.855 | 18.810 | 26.029 | 31.198 |
| 14 | 0.8300 | 2.471  | 2.111  | 2.706  | 5.614  | 18.169 |
| 14 | 0.8310 | 12.013 | 10.750 | 7.624  | 9.143  | 12.012 |
| 14 | 0.8320 | 12.242 | 10.142 | 16.159 | 6.757  | 16.251 |
| 14 | 0.8330 | 8.711  | 9.001  | 13.895 | 7.726  | 4.301  |
| 14 | 0.8340 | 18.353 | 10.557 | 21.463 | 24.802 | 7.521  |
| 14 | 0.8350 | 19.966 | 12.623 | 20.065 | 16.433 | 16.626 |
| 14 | 0.8360 | 9.545  | 10.514 | 10.567 | 15.370 | 15.917 |
| 14 | 0.8370 | 6.362  | 8.857  | 7.651  | 15.361 | 18.202 |
| 14 | 0.8380 | 7.556  | 14.382 | 9.564  | 17.538 | 22.256 |
| 14 | 0.8390 | 16.720 | 22.153 | 22.074 | 7.554  | 14.509 |
| 14 | 0.8400 | 17.157 | 20.540 | 21.449 | 9.579  | 10.058 |
| 14 | 0.8410 | 12.526 | 11.774 | 22.235 | 21.387 | 16.610 |
| 14 | 0.8420 | 12.242 | 8.658  | 15.904 | 9.018  | 23.165 |
| 14 | 0.8430 | 8.814  | 7.305  | 8.349  | 20.162 | 17.004 |
| 14 | 0.8440 | 7.482  | 6.964  | 7.870  | 20.240 | 20.802 |
| 14 | 0.8450 | 14.781 | 12.402 | 18.128 | 17.166 | 34.230 |
| 14 | 0.8460 | 10.620 | 8.488  | 10.274 | 15.930 | 16.794 |
| 14 | 0.8470 | 12.164 | 12.812 | 10.556 | 21.072 | 34.022 |
| 14 | 0.8480 | 7.682  | 7.085  | 11.205 | 9.502  | 7.475  |
| 14 | 0.8490 | 10.747 | 7.944  | 9.375  | 7.286  | 9.443  |
| 14 | 0.8500 | 10.175 | 11.673 | 12.158 | 8.719  | 15.202 |
| 14 | 0.8510 | 15.031 | 14.050 | 16.935 | 16.772 | 22.738 |
| 14 | 0.8520 | 11.908 | 12.034 | 7.238  | 23.620 | 29.199 |
| 14 | 0.8530 | 10.861 | 11.793 | 11.686 | 26.673 | 35.195 |
| 14 | 0.8540 | 17.941 | 20.437 | 16.413 | 11.644 | 17.938 |
| 14 | 0.8550 | 8.582  | 8.983  | 11.617 | 17.627 | 21.314 |
| 14 | 0.8560 | 3.916  | 5.832  | 5.856  | 11.034 | 21.241 |
| 14 | 0.8570 | 11.811 | 15.874 | 14.608 | 12.924 | 20.918 |
| 14 | 0.8580 | 6.924  | 5.200  | 6.330  | 10.404 | 22.749 |
| 14 | 0.8590 | 15.546 | 14.886 | 14.145 | 15.059 | 24.323 |
| 14 | 0.8600 | 14.822 | 15.897 | 11.663 | 14.021 | 16.432 |

|    |        |        |        |        |        |        |
|----|--------|--------|--------|--------|--------|--------|
| 14 | 0.8610 | 10.540 | 7.921  | 7.151  | 12.758 | 15.820 |
| 14 | 0.8620 | 17.942 | 13.506 | 11.485 | 16.770 | 17.647 |
| 14 | 0.8630 | 11.170 | 8.527  | 12.056 | 5.711  | 19.093 |
| 14 | 0.8640 | 18.232 | 13.253 | 18.342 | 12.851 | 21.487 |
| 14 | 0.8650 | 4.166  | 4.081  | 5.085  | 8.872  | 6.110  |
| 14 | 0.8660 | 11.621 | 9.037  | 13.789 | 4.688  | 5.082  |
| 14 | 0.8670 | 16.263 | 15.460 | 17.063 | 12.479 | 18.044 |
| 14 | 0.8680 | 13.401 | 14.200 | 12.732 | 14.598 | 12.978 |
| 14 | 0.8690 | 9.599  | 13.076 | 13.666 | 18.609 | 30.938 |
| 14 | 0.8700 | 9.571  | 12.551 | 12.684 | 15.573 | 15.827 |
| 14 | 0.8710 | 17.013 | 13.532 | 16.940 | 16.239 | 8.020  |
| 14 | 0.8720 | 8.260  | 9.200  | 13.115 | 10.192 | 14.033 |
| 14 | 0.8730 | 4.803  | 11.066 | 11.798 | 18.811 | 15.169 |
| 14 | 0.8740 | 6.367  | 13.171 | 8.197  | 16.610 | 12.400 |
| 14 | 0.8750 | 4.464  | 10.847 | 6.815  | 13.072 | 15.568 |
| 14 | 0.8760 | 4.531  | 9.014  | 3.592  | 8.494  | 3.874  |
| 14 | 0.8770 | 12.082 | 14.096 | 14.705 | 16.291 | 12.407 |
| 14 | 0.8780 | 11.293 | 11.771 | 13.032 | 9.507  | 13.520 |
| 14 | 0.8790 | 11.892 | 15.131 | 16.401 | 19.672 | 15.580 |
| 14 | 0.8800 | 10.097 | 14.551 | 8.999  | 16.323 | 18.209 |
| 14 | 0.8810 | 16.451 | 26.079 | 17.605 | 16.954 | 14.401 |
| 14 | 0.8820 | 11.721 | 26.542 | 17.912 | 15.437 | 11.181 |
| 14 | 0.8830 | 7.645  | 11.932 | 14.345 | 10.661 | 9.672  |
| 14 | 0.8840 | 17.584 | 7.855  | 12.566 | 13.388 | 9.240  |
| 14 | 0.8850 | 10.830 | 10.291 | 13.188 | 18.041 | 17.830 |
| 14 | 0.8860 | 9.600  | 13.804 | 15.593 | 15.165 | 10.354 |
| 14 | 0.8870 | 9.941  | 10.596 | 14.958 | 9.106  | 15.458 |
| 14 | 0.8880 | 9.024  | 12.100 | 12.698 | 23.344 | 8.892  |
| 14 | 0.8890 | 8.951  | 12.171 | 12.782 | 23.394 | 8.912  |
| 14 | 0.8900 | 12.627 | 22.499 | 24.261 | 25.317 | 16.911 |
| 14 | 0.8910 | 14.398 | 14.779 | 21.141 | 13.802 | 21.240 |
| 14 | 0.8920 | 12.312 | 15.425 | 23.365 | 14.021 | 23.614 |
| 14 | 0.8930 | 13.747 | 10.623 | 18.207 | 17.526 | 16.112 |
| 14 | 0.8940 | 14.161 | 11.202 | 18.950 | 17.588 | 16.111 |
| 14 | 0.8950 | 20.691 | 16.807 | 23.502 | 9.734  | 24.140 |
| 14 | 0.8960 | 14.430 | 18.457 | 20.010 | 10.891 | 14.532 |
| 14 | 0.8970 | 14.225 | 19.927 | 18.231 | 8.728  | 13.050 |
| 14 | 0.8980 | 12.922 | 14.401 | 15.977 | 12.848 | 13.210 |
| 14 | 0.8990 | 14.129 | 17.750 | 17.067 | 14.600 | 5.241  |
| 14 | 0.9000 | 14.063 | 17.591 | 17.058 | 14.716 | 5.198  |
| 14 | 0.9010 | 15.770 | 13.216 | 22.849 | 7.636  | 12.705 |
| 14 | 0.9020 | 25.261 | 30.152 | 35.458 | 16.198 | 19.281 |
| 14 | 0.9030 | 13.421 | 15.983 | 14.156 | 16.611 | 18.778 |
| 14 | 0.9040 | 8.312  | 12.073 | 10.683 | 11.458 | 6.822  |
| 14 | 0.9050 | 5.548  | 5.632  | 4.145  | 7.386  | 14.366 |
| 14 | 0.9060 | 8.170  | 7.575  | 9.342  | 6.136  | 8.183  |
| 14 | 0.9070 | 15.848 | 10.455 | 11.777 | 8.992  | 17.614 |
| 14 | 0.9080 | 19.953 | 11.051 | 20.198 | 10.813 | 8.432  |
| 14 | 0.9090 | 14.049 | 13.660 | 10.649 | 10.949 | 20.090 |
| 14 | 0.9100 | 17.001 | 16.048 | 13.535 | 10.063 | 20.137 |

|    |        |        |        |        |        |        |
|----|--------|--------|--------|--------|--------|--------|
| 14 | 0.9110 | 12.601 | 11.720 | 11.763 | 6.776  | 22.637 |
| 14 | 0.9120 | 10.367 | 11.013 | 7.462  | 18.515 | 20.227 |
| 14 | 0.9130 | 14.703 | 12.576 | 9.716  | 13.631 | 9.092  |
| 14 | 0.9140 | 15.830 | 11.999 | 11.513 | 10.646 | 13.832 |
| 14 | 0.9150 | 19.384 | 18.525 | 16.929 | 4.999  | 14.559 |
| 14 | 0.9160 | 12.948 | 10.825 | 15.334 | 14.827 | 12.412 |
| 14 | 0.9170 | 10.899 | 15.830 | 16.792 | 15.165 | 15.695 |
| 14 | 0.9180 | 9.275  | 13.314 | 6.934  | 10.044 | 8.711  |
| 14 | 0.9190 | 17.212 | 17.828 | 12.110 | 8.237  | 13.606 |
| 14 | 0.9200 | 10.899 | 16.494 | 13.767 | 21.645 | 9.670  |
| 14 | 0.9210 | 5.029  | 8.517  | 5.765  | 11.243 | 5.637  |
| 14 | 0.9220 | 6.814  | 7.449  | 8.880  | 9.067  | 15.870 |
| 14 | 0.9230 | 0.000  | 0.000  | 0.000  | 0.000  | 0.000  |
| 15 | 0.0000 | 0.000  | 0.000  | 0.000  | 0.000  | 0.000  |
| 15 | 0.0010 | 0.000  | 0.000  | 0.000  | 0.000  | 0.000  |
| 15 | 0.0020 | 12.678 | 7.204  | 9.779  | 18.661 | 25.662 |
| 15 | 0.0030 | 12.664 | 7.155  | 9.771  | 18.608 | 25.523 |
| 15 | 0.0040 | 12.652 | 7.114  | 9.765  | 18.557 | 25.376 |
| 15 | 0.0050 | 3.132  | 3.207  | 7.376  | 9.500  | 13.366 |
| 15 | 0.0060 | 3.184  | 3.165  | 7.442  | 9.392  | 13.289 |
| 15 | 0.0070 | 3.237  | 3.130  | 7.510  | 9.284  | 13.215 |
| 15 | 0.0080 | 5.550  | 9.587  | 9.839  | 13.152 | 14.111 |
| 15 | 0.0090 | 5.552  | 9.587  | 9.846  | 13.146 | 14.085 |
| 15 | 0.0100 | 6.711  | 5.058  | 6.940  | 16.414 | 16.403 |
| 15 | 0.0110 | 6.622  | 5.046  | 6.902  | 16.375 | 16.446 |
| 15 | 0.0120 | 9.318  | 8.215  | 5.416  | 19.321 | 19.227 |
| 15 | 0.0130 | 7.884  | 7.418  | 12.982 | 10.802 | 15.483 |
| 15 | 0.0140 | 7.756  | 6.618  | 8.228  | 10.451 | 17.937 |
| 15 | 0.0150 | 7.763  | 6.677  | 8.188  | 10.570 | 17.853 |
| 15 | 0.0160 | 10.716 | 9.740  | 10.304 | 14.518 | 15.007 |
| 15 | 0.0170 | 13.062 | 12.812 | 11.224 | 19.770 | 26.696 |
| 15 | 0.0180 | 23.388 | 16.330 | 14.002 | 18.097 | 28.186 |
| 15 | 0.0190 | 15.229 | 15.387 | 12.726 | 19.855 | 19.656 |
| 15 | 0.0200 | 14.267 | 19.869 | 16.861 | 26.310 | 14.790 |
| 15 | 0.0210 | 14.280 | 19.846 | 17.122 | 26.158 | 14.961 |
| 15 | 0.0220 | 11.807 | 12.306 | 14.904 | 11.726 | 22.993 |
| 15 | 0.0230 | 7.525  | 9.514  | 13.558 | 7.691  | 17.716 |
| 15 | 0.0240 | 7.466  | 5.296  | 7.947  | 10.485 | 10.257 |
| 15 | 0.0250 | 16.309 | 6.983  | 13.108 | 16.583 | 12.870 |
| 15 | 0.0260 | 3.876  | 6.623  | 6.312  | 16.102 | 11.255 |
| 15 | 0.0270 | 16.924 | 13.050 | 13.818 | 20.889 | 20.625 |
| 15 | 0.0280 | 6.563  | 10.416 | 11.480 | 16.113 | 15.867 |
| 15 | 0.0290 | 12.152 | 13.304 | 12.258 | 12.462 | 20.067 |
| 15 | 0.0300 | 11.135 | 8.239  | 5.444  | 21.996 | 28.121 |
| 15 | 0.0310 | 5.765  | 9.285  | 7.550  | 10.082 | 16.473 |
| 15 | 0.0320 | 7.850  | 12.283 | 14.971 | 15.962 | 18.718 |
| 15 | 0.0330 | 6.069  | 9.892  | 10.816 | 12.662 | 26.000 |
| 15 | 0.0340 | 25.994 | 15.618 | 23.426 | 26.747 | 18.387 |
| 15 | 0.0350 | 13.602 | 12.760 | 15.430 | 20.624 | 13.713 |
| 15 | 0.0360 | 8.357  | 10.218 | 10.368 | 15.573 | 11.993 |

|    |        |        |        |        |        |        |
|----|--------|--------|--------|--------|--------|--------|
| 15 | 0.0370 | 5.057  | 7.051  | 6.854  | 13.158 | 11.326 |
| 15 | 0.0380 | 4.985  | 6.396  | 5.096  | 18.222 | 17.279 |
| 15 | 0.0390 | 5.508  | 6.150  | 5.730  | 10.196 | 15.843 |
| 15 | 0.0400 | 13.272 | 12.279 | 13.726 | 17.532 | 13.672 |
| 15 | 0.0410 | 10.349 | 14.791 | 18.448 | 16.353 | 18.618 |
| 15 | 0.0420 | 7.993  | 13.982 | 14.833 | 13.043 | 16.841 |
| 15 | 0.0430 | 6.234  | 7.430  | 12.156 | 12.480 | 20.885 |
| 15 | 0.0440 | 9.736  | 13.218 | 14.495 | 15.432 | 20.075 |
| 15 | 0.0450 | 9.510  | 12.990 | 13.943 | 15.476 | 19.759 |
| 15 | 0.0460 | 9.246  | 11.957 | 10.847 | 16.098 | 27.737 |
| 15 | 0.0470 | 11.649 | 11.350 | 13.465 | 16.979 | 28.338 |
| 15 | 0.0480 | 18.535 | 22.824 | 16.304 | 24.836 | 25.915 |
| 15 | 0.0490 | 16.147 | 14.897 | 17.738 | 30.023 | 27.729 |
| 15 | 0.0500 | 11.354 | 9.654  | 10.388 | 13.142 | 19.591 |
| 15 | 0.0510 | 11.397 | 7.439  | 13.449 | 24.362 | 19.329 |
| 15 | 0.0520 | 19.190 | 9.631  | 20.495 | 21.055 | 15.801 |
| 15 | 0.0530 | 12.256 | 6.049  | 11.091 | 18.625 | 22.679 |
| 15 | 0.0540 | 11.491 | 7.391  | 10.298 | 22.437 | 15.649 |
| 15 | 0.0550 | 11.918 | 8.095  | 14.159 | 25.998 | 11.651 |
| 15 | 0.0560 | 11.935 | 8.104  | 14.136 | 26.173 | 11.714 |
| 15 | 0.0570 | 9.783  | 14.934 | 8.131  | 26.931 | 13.428 |
| 15 | 0.0580 | 10.564 | 11.709 | 13.316 | 18.458 | 16.427 |
| 15 | 0.0590 | 4.154  | 5.519  | 5.220  | 15.261 | 8.951  |
| 15 | 0.0600 | 5.868  | 6.452  | 5.442  | 12.944 | 13.065 |
| 15 | 0.0610 | 12.127 | 14.049 | 15.503 | 11.734 | 14.686 |
| 15 | 0.0620 | 8.498  | 6.364  | 9.053  | 8.027  | 14.589 |
| 15 | 0.0630 | 10.555 | 8.736  | 12.985 | 13.336 | 16.822 |
| 15 | 0.0640 | 8.748  | 12.002 | 10.564 | 17.969 | 18.209 |
| 15 | 0.0650 | 18.156 | 16.168 | 16.297 | 15.088 | 30.377 |
| 15 | 0.0660 | 23.760 | 21.627 | 19.590 | 29.094 | 29.877 |
| 15 | 0.0670 | 17.203 | 13.167 | 19.518 | 24.411 | 16.724 |
| 15 | 0.0680 | 15.299 | 8.798  | 12.478 | 16.401 | 18.140 |
| 15 | 0.0690 | 14.548 | 9.756  | 10.771 | 12.297 | 22.710 |
| 15 | 0.0700 | 33.179 | 28.043 | 34.249 | 21.082 | 24.121 |
| 15 | 0.0710 | 18.227 | 22.644 | 22.767 | 22.318 | 31.086 |
| 15 | 0.0720 | 20.233 | 21.086 | 24.769 | 28.983 | 27.461 |
| 15 | 0.0730 | 11.384 | 13.235 | 19.394 | 20.248 | 31.198 |
| 15 | 0.0740 | 11.264 | 13.196 | 19.407 | 19.574 | 31.028 |
| 15 | 0.0750 | 13.788 | 16.818 | 14.649 | 21.639 | 17.574 |
| 15 | 0.0760 | 11.344 | 18.821 | 16.789 | 20.288 | 26.823 |
| 15 | 0.0770 | 22.655 | 17.340 | 20.519 | 21.022 | 26.509 |
| 15 | 0.0780 | 23.980 | 24.786 | 23.991 | 20.591 | 32.757 |
| 15 | 0.0790 | 21.732 | 24.509 | 23.471 | 29.289 | 31.129 |
| 15 | 0.0800 | 15.207 | 13.747 | 16.769 | 19.655 | 20.991 |
| 15 | 0.0810 | 15.542 | 19.129 | 19.415 | 17.110 | 23.836 |
| 15 | 0.0820 | 25.948 | 15.697 | 19.511 | 17.031 | 30.907 |
| 15 | 0.0830 | 20.518 | 8.511  | 15.914 | 16.054 | 35.761 |
| 15 | 0.0840 | 15.976 | 8.071  | 14.158 | 13.789 | 20.390 |
| 15 | 0.0850 | 10.517 | 10.196 | 10.222 | 19.074 | 20.573 |
| 15 | 0.0860 | 15.460 | 6.292  | 15.124 | 5.820  | 12.159 |

|    |        |        |        |        |        |        |
|----|--------|--------|--------|--------|--------|--------|
| 15 | 0.0870 | 18.687 | 7.024  | 16.505 | 8.029  | 12.574 |
| 15 | 0.0880 | 8.071  | 9.922  | 10.240 | 11.808 | 18.425 |
| 15 | 0.0890 | 27.803 | 16.254 | 24.538 | 6.416  | 12.663 |
| 15 | 0.0900 | 23.913 | 12.380 | 20.564 | 15.478 | 13.710 |
| 15 | 0.0910 | 17.420 | 9.414  | 19.230 | 6.142  | 10.699 |
| 15 | 0.0920 | 19.664 | 12.306 | 15.604 | 5.819  | 5.250  |
| 15 | 0.0930 | 6.267  | 6.955  | 9.018  | 6.426  | 4.982  |
| 15 | 0.0940 | 13.471 | 7.723  | 16.636 | 4.594  | 3.648  |
| 15 | 0.0950 | 17.891 | 11.394 | 18.756 | 14.185 | 14.936 |
| 15 | 0.0960 | 16.578 | 6.106  | 12.505 | 9.676  | 23.521 |
| 15 | 0.0970 | 19.024 | 15.741 | 15.050 | 14.968 | 16.457 |
| 15 | 0.0980 | 16.400 | 19.427 | 13.312 | 27.786 | 16.629 |
| 15 | 0.0990 | 15.473 | 11.572 | 14.107 | 19.559 | 17.599 |
| 15 | 0.1000 | 14.863 | 13.038 | 12.323 | 29.779 | 22.919 |
| 15 | 0.1010 | 18.374 | 8.936  | 12.240 | 8.922  | 9.386  |
| 15 | 0.1020 | 16.587 | 8.427  | 11.105 | 20.318 | 15.355 |
| 15 | 0.1030 | 9.564  | 8.689  | 9.423  | 11.917 | 16.917 |
| 15 | 0.1040 | 20.457 | 14.937 | 14.255 | 15.271 | 12.416 |
| 15 | 0.1050 | 10.234 | 9.373  | 13.646 | 9.443  | 14.610 |
| 15 | 0.1060 | 14.005 | 14.427 | 17.250 | 18.585 | 10.486 |
| 15 | 0.1070 | 15.653 | 13.975 | 23.121 | 16.750 | 15.300 |
| 15 | 0.1080 | 21.808 | 14.854 | 24.699 | 9.847  | 16.872 |
| 15 | 0.1090 | 20.367 | 15.693 | 23.819 | 11.673 | 25.139 |
| 15 | 0.1100 | 17.127 | 9.932  | 11.656 | 15.021 | 10.833 |
| 15 | 0.1110 | 9.199  | 8.787  | 5.789  | 16.114 | 17.393 |
| 15 | 0.1120 | 8.350  | 5.735  | 6.591  | 26.672 | 19.874 |
| 15 | 0.1130 | 4.475  | 6.680  | 9.275  | 18.734 | 20.612 |
| 15 | 0.1140 | 6.307  | 8.886  | 13.152 | 17.392 | 21.940 |
| 15 | 0.1150 | 5.490  | 6.279  | 6.496  | 18.021 | 26.730 |
| 15 | 0.1160 | 16.149 | 12.364 | 17.021 | 22.265 | 18.679 |
| 15 | 0.1170 | 16.217 | 12.399 | 17.026 | 22.177 | 18.686 |
| 15 | 0.1180 | 16.275 | 12.428 | 17.017 | 22.087 | 18.693 |
| 15 | 0.1190 | 10.009 | 7.395  | 11.137 | 19.673 | 15.618 |
| 15 | 0.1200 | 14.960 | 16.462 | 11.640 | 25.089 | 29.486 |
| 15 | 0.1210 | 17.577 | 18.229 | 15.009 | 17.565 | 28.529 |
| 15 | 0.1220 | 11.832 | 13.065 | 14.341 | 16.089 | 34.092 |
| 15 | 0.1230 | 8.926  | 8.706  | 10.607 | 15.978 | 22.655 |
| 15 | 0.1240 | 10.812 | 13.483 | 16.659 | 22.924 | 30.042 |
| 15 | 0.1250 | 19.651 | 15.345 | 20.007 | 19.769 | 24.889 |
| 15 | 0.1260 | 11.247 | 9.585  | 11.898 | 14.448 | 32.479 |
| 15 | 0.1270 | 13.897 | 9.298  | 15.415 | 14.851 | 28.753 |
| 15 | 0.1280 | 13.392 | 5.628  | 9.380  | 13.777 | 34.199 |
| 15 | 0.1290 | 13.404 | 9.133  | 18.123 | 11.597 | 24.492 |
| 15 | 0.1300 | 17.241 | 15.010 | 19.719 | 14.572 | 25.472 |
| 15 | 0.1310 | 19.109 | 15.073 | 21.694 | 11.606 | 19.277 |
| 15 | 0.1320 | 16.061 | 21.572 | 18.796 | 23.293 | 28.086 |
| 15 | 0.1330 | 16.103 | 19.318 | 13.592 | 13.676 | 23.847 |
| 15 | 0.1340 | 15.098 | 16.238 | 8.956  | 18.017 | 19.770 |
| 15 | 0.1350 | 9.299  | 7.141  | 7.600  | 12.105 | 17.510 |
| 15 | 0.1360 | 22.049 | 20.578 | 25.879 | 9.415  | 20.418 |



|    |        |        |        |        |        |        |
|----|--------|--------|--------|--------|--------|--------|
| 15 | 0.1370 | 15.844 | 14.438 | 18.793 | 16.575 | 13.258 |
| 15 | 0.1380 | 18.971 | 11.060 | 14.576 | 18.317 | 22.714 |
| 15 | 0.1390 | 13.901 | 13.149 | 11.989 | 20.744 | 27.320 |
| 15 | 0.1400 | 13.030 | 15.645 | 14.815 | 11.921 | 10.769 |
| 15 | 0.1410 | 19.981 | 8.704  | 16.204 | 22.605 | 13.173 |
| 15 | 0.1420 | 15.993 | 13.110 | 13.512 | 20.918 | 25.977 |
| 15 | 0.1430 | 13.115 | 12.297 | 14.481 | 19.332 | 24.536 |
| 15 | 0.1440 | 12.809 | 10.324 | 11.807 | 12.634 | 6.139  |
| 15 | 0.1450 | 23.245 | 11.889 | 15.886 | 17.614 | 12.818 |
| 15 | 0.1460 | 23.244 | 11.890 | 15.886 | 17.610 | 12.810 |
| 15 | 0.1470 | 8.766  | 13.783 | 7.764  | 9.713  | 10.734 |
| 15 | 0.1480 | 7.391  | 11.391 | 6.472  | 9.988  | 6.124  |
| 15 | 0.1490 | 7.575  | 6.017  | 5.332  | 9.942  | 6.903  |
| 15 | 0.1500 | 13.055 | 6.869  | 8.237  | 11.460 | 9.542  |
| 15 | 0.1510 | 13.096 | 6.901  | 8.281  | 11.421 | 9.503  |
| 15 | 0.1520 | 13.117 | 10.660 | 11.388 | 12.799 | 26.068 |
| 15 | 0.1530 | 13.089 | 10.658 | 11.388 | 12.822 | 26.077 |
| 15 | 0.1540 | 6.680  | 6.419  | 7.531  | 20.563 | 20.280 |
| 15 | 0.1550 | 3.047  | 3.675  | 7.035  | 15.733 | 11.680 |
| 15 | 0.1560 | 7.099  | 4.327  | 8.173  | 12.165 | 16.131 |
| 15 | 0.1570 | 29.248 | 25.946 | 28.422 | 10.027 | 13.790 |
| 15 | 0.1580 | 19.373 | 16.895 | 23.872 | 16.038 | 17.511 |
| 15 | 0.1590 | 10.358 | 6.374  | 15.570 | 13.029 | 18.531 |
| 15 | 0.1600 | 17.347 | 16.825 | 15.587 | 17.342 | 23.276 |
| 15 | 0.1610 | 12.692 | 7.772  | 6.534  | 16.379 | 25.194 |
| 15 | 0.1620 | 13.466 | 13.412 | 6.834  | 15.705 | 17.672 |
| 15 | 0.1630 | 1.195  | 2.699  | 4.841  | 4.261  | 9.609  |
| 15 | 0.1640 | 21.227 | 26.139 | 23.307 | 14.886 | 14.549 |
| 15 | 0.1650 | 14.649 | 16.576 | 12.908 | 17.749 | 21.746 |
| 15 | 0.1660 | 10.010 | 13.027 | 10.911 | 13.373 | 21.963 |
| 15 | 0.1670 | 9.861  | 10.114 | 13.450 | 8.406  | 11.241 |
| 15 | 0.1680 | 13.551 | 12.683 | 11.681 | 13.683 | 20.817 |
| 15 | 0.1690 | 6.413  | 9.009  | 8.170  | 18.945 | 11.289 |
| 15 | 0.1700 | 18.818 | 18.703 | 18.945 | 18.342 | 21.537 |
| 15 | 0.1710 | 17.188 | 13.997 | 15.348 | 10.033 | 12.187 |
| 15 | 0.1720 | 17.141 | 14.026 | 15.170 | 10.139 | 12.093 |
| 15 | 0.1730 | 11.217 | 12.206 | 12.298 | 12.582 | 20.404 |
| 15 | 0.1740 | 11.118 | 6.252  | 8.150  | 16.784 | 19.101 |
| 15 | 0.1750 | 17.757 | 14.262 | 15.856 | 22.333 | 16.740 |
| 15 | 0.1760 | 9.593  | 11.284 | 7.664  | 17.386 | 13.481 |
| 15 | 0.1770 | 7.748  | 8.323  | 8.968  | 19.020 | 13.682 |
| 15 | 0.1780 | 13.334 | 15.725 | 12.923 | 21.398 | 17.646 |
| 15 | 0.1790 | 22.755 | 15.454 | 20.954 | 17.795 | 20.165 |
| 15 | 0.1800 | 22.473 | 21.218 | 22.020 | 20.538 | 27.790 |
| 15 | 0.1810 | 10.147 | 11.767 | 14.539 | 21.641 | 25.552 |
| 15 | 0.1820 | 18.996 | 17.722 | 20.266 | 15.846 | 24.416 |
| 15 | 0.1830 | 6.368  | 6.656  | 6.834  | 8.602  | 7.451  |
| 15 | 0.1840 | 10.615 | 12.627 | 8.819  | 14.660 | 14.901 |
| 15 | 0.1850 | 11.605 | 9.510  | 10.462 | 12.826 | 13.076 |
| 15 | 0.1860 | 10.743 | 9.909  | 10.354 | 22.489 | 13.126 |

|    |        |        |        |        |        |        |
|----|--------|--------|--------|--------|--------|--------|
| 15 | 0.1870 | 10.711 | 9.761  | 10.401 | 18.571 | 18.085 |
| 15 | 0.1880 | 13.858 | 11.884 | 13.734 | 16.106 | 13.277 |
| 15 | 0.1890 | 11.028 | 11.971 | 11.535 | 13.038 | 21.587 |
| 15 | 0.1900 | 9.012  | 7.441  | 6.185  | 12.727 | 14.588 |
| 15 | 0.1910 | 14.836 | 8.658  | 7.187  | 12.790 | 16.937 |
| 15 | 0.1920 | 15.705 | 18.588 | 10.425 | 15.467 | 8.692  |
| 15 | 0.1930 | 14.496 | 11.071 | 14.409 | 18.752 | 12.913 |
| 15 | 0.1940 | 8.531  | 8.678  | 8.841  | 18.523 | 12.439 |
| 15 | 0.1950 | 5.989  | 6.542  | 6.326  | 19.051 | 10.619 |
| 15 | 0.1960 | 9.232  | 11.840 | 8.949  | 22.809 | 19.967 |
| 15 | 0.1970 | 9.441  | 14.417 | 11.238 | 16.188 | 20.081 |
| 15 | 0.1980 | 14.432 | 15.860 | 13.560 | 13.841 | 11.216 |
| 15 | 0.1990 | 10.513 | 10.633 | 10.342 | 12.414 | 18.876 |
| 15 | 0.2000 | 6.509  | 9.715  | 7.847  | 10.056 | 11.783 |
| 15 | 0.2010 | 7.881  | 12.757 | 18.156 | 12.976 | 16.080 |
| 15 | 0.2020 | 8.359  | 8.432  | 7.413  | 9.716  | 9.452  |
| 15 | 0.2030 | 8.378  | 8.471  | 7.415  | 9.729  | 9.481  |
| 15 | 0.2040 | 7.003  | 5.875  | 5.621  | 8.947  | 20.528 |
| 15 | 0.2050 | 5.975  | 6.676  | 5.072  | 12.360 | 16.391 |
| 15 | 0.2060 | 6.904  | 10.468 | 8.613  | 15.203 | 15.090 |
| 15 | 0.2070 | 8.809  | 11.846 | 10.104 | 14.629 | 10.649 |
| 15 | 0.2080 | 21.935 | 16.614 | 13.814 | 20.550 | 18.825 |
| 15 | 0.2090 | 9.359  | 9.029  | 8.220  | 14.413 | 17.603 |
| 15 | 0.2100 | 8.776  | 13.986 | 11.894 | 14.246 | 9.103  |
| 15 | 0.2110 | 6.060  | 8.202  | 9.670  | 20.314 | 16.468 |
| 15 | 0.2120 | 14.840 | 7.092  | 8.352  | 7.898  | 10.821 |
| 15 | 0.2130 | 16.739 | 12.287 | 11.173 | 8.586  | 8.579  |
| 15 | 0.2140 | 15.290 | 18.408 | 9.860  | 24.194 | 11.879 |
| 15 | 0.2150 | 13.586 | 9.362  | 9.585  | 15.976 | 16.868 |
| 15 | 0.2160 | 9.271  | 15.382 | 12.210 | 14.301 | 16.316 |
| 15 | 0.2170 | 14.414 | 13.333 | 10.366 | 24.147 | 21.861 |
| 15 | 0.2180 | 16.283 | 13.170 | 12.298 | 16.970 | 16.709 |
| 15 | 0.2190 | 14.717 | 20.460 | 12.963 | 29.440 | 9.350  |
| 15 | 0.2200 | 17.741 | 12.845 | 10.985 | 15.339 | 12.906 |
| 15 | 0.2210 | 12.790 | 7.970  | 8.688  | 21.439 | 16.634 |
| 15 | 0.2220 | 16.636 | 18.409 | 15.238 | 23.071 | 20.288 |
| 15 | 0.2230 | 12.486 | 18.765 | 11.490 | 17.880 | 9.687  |
| 15 | 0.2240 | 19.464 | 23.676 | 16.925 | 15.183 | 11.193 |
| 15 | 0.2250 | 13.427 | 22.203 | 13.156 | 24.097 | 10.128 |
| 15 | 0.2260 | 21.296 | 28.086 | 18.247 | 21.410 | 11.288 |
| 15 | 0.2270 | 14.925 | 14.628 | 11.025 | 21.952 | 9.292  |
| 15 | 0.2280 | 14.812 | 9.505  | 8.212  | 23.373 | 9.627  |
| 15 | 0.2290 | 17.202 | 20.444 | 15.680 | 24.322 | 13.114 |
| 15 | 0.2300 | 13.972 | 21.263 | 16.641 | 33.384 | 12.035 |
| 15 | 0.2310 | 17.524 | 18.151 | 18.837 | 18.691 | 12.923 |
| 15 | 0.2320 | 13.429 | 17.631 | 14.480 | 22.404 | 14.388 |
| 15 | 0.2330 | 10.829 | 12.953 | 10.124 | 15.752 | 18.457 |
| 15 | 0.2340 | 7.652  | 6.323  | 3.082  | 12.478 | 15.036 |
| 15 | 0.2350 | 12.447 | 16.807 | 11.680 | 31.236 | 10.703 |
| 15 | 0.2360 | 14.554 | 22.182 | 12.404 | 30.756 | 13.128 |

|    |        |        |        |        |        |        |
|----|--------|--------|--------|--------|--------|--------|
| 15 | 0.2370 | 11.402 | 18.188 | 13.202 | 26.541 | 8.623  |
| 15 | 0.2380 | 18.995 | 16.804 | 15.539 | 17.265 | 5.904  |
| 15 | 0.2390 | 18.461 | 11.784 | 10.725 | 22.767 | 14.783 |
| 15 | 0.2400 | 9.230  | 11.454 | 3.422  | 28.913 | 18.627 |
| 15 | 0.2410 | 7.537  | 12.248 | 7.572  | 17.444 | 18.335 |
| 15 | 0.2420 | 22.157 | 17.000 | 15.384 | 25.580 | 20.875 |
| 15 | 0.2430 | 19.958 | 19.325 | 16.764 | 31.790 | 13.500 |
| 15 | 0.2440 | 13.999 | 12.366 | 11.126 | 29.072 | 19.008 |
| 15 | 0.2450 | 18.119 | 19.302 | 14.487 | 15.008 | 10.012 |
| 15 | 0.2460 | 14.474 | 10.813 | 10.194 | 19.127 | 27.110 |
| 15 | 0.2470 | 14.493 | 10.793 | 10.185 | 18.905 | 26.937 |
| 15 | 0.2480 | 5.920  | 11.545 | 7.910  | 13.249 | 19.437 |
| 15 | 0.2490 | 21.603 | 16.556 | 15.174 | 25.072 | 24.071 |
| 15 | 0.2500 | 18.294 | 11.714 | 12.665 | 19.764 | 16.424 |
| 15 | 0.2510 | 23.732 | 14.922 | 16.071 | 13.721 | 15.847 |
| 15 | 0.2520 | 3.762  | 3.473  | 3.080  | 8.493  | 12.993 |
| 15 | 0.2530 | 10.098 | 14.334 | 8.349  | 17.477 | 15.014 |
| 15 | 0.2540 | 14.301 | 15.966 | 10.572 | 22.845 | 19.144 |
| 15 | 0.2550 | 14.121 | 9.581  | 8.580  | 16.959 | 13.451 |
| 15 | 0.2560 | 15.366 | 13.285 | 12.947 | 17.959 | 20.821 |
| 15 | 0.2570 | 22.281 | 14.305 | 13.419 | 17.606 | 11.182 |
| 15 | 0.2580 | 25.067 | 16.103 | 10.745 | 17.383 | 25.008 |
| 15 | 0.2590 | 12.464 | 16.279 | 10.553 | 25.162 | 23.154 |
| 15 | 0.2600 | 9.131  | 10.615 | 5.403  | 23.263 | 17.891 |
| 15 | 0.2610 | 18.775 | 17.682 | 14.326 | 24.136 | 25.145 |
| 15 | 0.2620 | 10.924 | 18.518 | 12.192 | 27.317 | 14.637 |
| 15 | 0.2630 | 13.804 | 13.828 | 8.734  | 19.257 | 13.625 |
| 15 | 0.2640 | 22.034 | 19.626 | 13.773 | 17.800 | 12.072 |
| 15 | 0.2650 | 14.947 | 15.970 | 10.345 | 19.180 | 12.639 |
| 15 | 0.2660 | 12.490 | 24.772 | 10.336 | 24.070 | 14.691 |
| 15 | 0.2670 | 19.990 | 18.261 | 9.300  | 21.051 | 15.667 |
| 15 | 0.2680 | 15.670 | 17.922 | 11.539 | 18.700 | 13.171 |
| 15 | 0.2690 | 12.741 | 13.517 | 10.681 | 31.464 | 28.838 |
| 15 | 0.2700 | 10.989 | 15.370 | 13.910 | 11.585 | 26.197 |
| 15 | 0.2710 | 7.968  | 9.490  | 7.114  | 6.452  | 8.171  |
| 15 | 0.2720 | 18.580 | 10.031 | 10.929 | 20.378 | 28.441 |
| 15 | 0.2730 | 17.234 | 10.001 | 8.870  | 24.307 | 22.201 |
| 15 | 0.2740 | 17.232 | 10.001 | 8.874  | 24.308 | 22.202 |
| 15 | 0.2750 | 17.231 | 10.002 | 8.877  | 24.310 | 22.203 |
| 15 | 0.2760 | 14.462 | 9.363  | 9.611  | 12.951 | 16.106 |
| 15 | 0.2770 | 27.961 | 21.361 | 14.907 | 19.513 | 14.473 |
| 15 | 0.2780 | 16.810 | 10.092 | 10.173 | 20.056 | 13.195 |
| 15 | 0.2790 | 13.962 | 17.429 | 15.606 | 32.781 | 21.052 |
| 15 | 0.2800 | 18.355 | 10.092 | 13.482 | 19.059 | 27.094 |
| 15 | 0.2810 | 19.527 | 13.497 | 12.723 | 27.069 | 20.491 |
| 15 | 0.2820 | 26.588 | 23.798 | 17.735 | 34.484 | 23.763 |
| 15 | 0.2830 | 21.414 | 15.302 | 16.312 | 21.135 | 25.858 |
| 15 | 0.2840 | 11.534 | 6.964  | 5.265  | 12.104 | 18.989 |
| 15 | 0.2850 | 19.818 | 24.323 | 14.672 | 18.285 | 17.062 |
| 15 | 0.2860 | 11.493 | 18.014 | 9.762  | 22.121 | 15.428 |

|    |        |        |        |        |        |        |
|----|--------|--------|--------|--------|--------|--------|
| 15 | 0.2870 | 15.574 | 20.406 | 12.009 | 21.746 | 15.365 |
| 15 | 0.2880 | 11.397 | 16.293 | 13.027 | 16.330 | 14.177 |
| 15 | 0.2890 | 23.733 | 23.676 | 21.825 | 10.808 | 16.697 |
| 15 | 0.2900 | 27.868 | 22.245 | 25.288 | 9.157  | 11.343 |
| 15 | 0.2910 | 17.117 | 18.610 | 15.296 | 18.093 | 10.333 |
| 15 | 0.2920 | 33.337 | 28.061 | 27.333 | 13.453 | 26.815 |
| 15 | 0.2930 | 11.383 | 11.869 | 8.025  | 6.747  | 12.415 |
| 15 | 0.2940 | 11.751 | 19.990 | 12.697 | 21.003 | 12.227 |
| 15 | 0.2950 | 11.857 | 22.987 | 13.486 | 21.625 | 14.674 |
| 15 | 0.2960 | 35.361 | 34.077 | 26.704 | 18.201 | 15.997 |
| 15 | 0.2970 | 19.028 | 23.682 | 16.095 | 9.767  | 5.434  |
| 15 | 0.2980 | 37.420 | 45.078 | 32.617 | 17.363 | 9.071  |
| 15 | 0.2990 | 18.029 | 28.130 | 20.243 | 24.014 | 11.887 |
| 15 | 0.3000 | 20.253 | 22.805 | 17.842 | 19.734 | 14.133 |
| 15 | 0.3010 | 20.596 | 26.388 | 26.313 | 19.081 | 9.070  |
| 15 | 0.3020 | 12.423 | 12.637 | 16.888 | 18.432 | 14.896 |
| 15 | 0.3030 | 10.564 | 19.089 | 13.574 | 18.455 | 11.704 |
| 15 | 0.3040 | 8.692  | 13.501 | 11.278 | 11.140 | 9.060  |
| 15 | 0.3050 | 9.613  | 15.646 | 13.019 | 11.197 | 8.230  |
| 15 | 0.3060 | 23.422 | 24.175 | 14.578 | 26.851 | 20.666 |
| 15 | 0.3070 | 23.696 | 16.048 | 13.817 | 6.692  | 8.612  |
| 15 | 0.3080 | 8.253  | 9.903  | 10.068 | 12.776 | 8.674  |
| 15 | 0.3090 | 10.403 | 7.510  | 7.554  | 13.295 | 13.552 |
| 15 | 0.3100 | 14.501 | 12.907 | 14.185 | 10.895 | 7.294  |
| 15 | 0.3110 | 18.751 | 18.717 | 20.578 | 7.640  | 6.394  |
| 15 | 0.3120 | 14.589 | 15.180 | 14.026 | 15.137 | 9.412  |
| 15 | 0.3130 | 12.644 | 15.079 | 9.493  | 24.112 | 12.496 |
| 15 | 0.3140 | 17.213 | 17.651 | 20.824 | 19.408 | 9.480  |
| 15 | 0.3150 | 13.763 | 16.480 | 17.116 | 23.441 | 16.050 |
| 15 | 0.3160 | 4.272  | 10.244 | 6.315  | 12.928 | 6.294  |
| 15 | 0.3170 | 11.490 | 12.844 | 13.604 | 14.437 | 9.995  |
| 15 | 0.3180 | 12.697 | 21.047 | 14.303 | 29.158 | 11.377 |
| 15 | 0.3190 | 3.196  | 4.988  | 3.976  | 2.796  | 3.888  |
| 15 | 0.3200 | 2.878  | 4.035  | 5.033  | 6.454  | 12.654 |
| 15 | 0.3210 | 14.416 | 15.033 | 10.455 | 13.644 | 17.750 |
| 15 | 0.3220 | 15.511 | 18.170 | 15.897 | 20.228 | 17.639 |
| 15 | 0.3230 | 9.906  | 19.490 | 10.802 | 16.780 | 11.973 |
| 15 | 0.3240 | 12.015 | 9.845  | 13.869 | 9.477  | 16.550 |
| 15 | 0.3250 | 16.102 | 26.737 | 19.403 | 34.802 | 17.285 |
| 15 | 0.3260 | 18.775 | 25.628 | 17.320 | 18.348 | 19.452 |
| 15 | 0.3270 | 15.518 | 21.965 | 18.795 | 16.292 | 17.238 |
| 15 | 0.3280 | 9.649  | 18.024 | 13.667 | 13.646 | 10.628 |
| 15 | 0.3290 | 10.898 | 19.949 | 14.818 | 21.857 | 14.157 |
| 15 | 0.3300 | 9.771  | 16.782 | 9.804  | 17.955 | 10.632 |
| 15 | 0.3310 | 9.742  | 8.717  | 8.521  | 13.673 | 8.017  |
| 15 | 0.3320 | 8.656  | 6.748  | 9.658  | 14.273 | 7.462  |
| 15 | 0.3330 | 15.878 | 7.810  | 11.172 | 16.081 | 5.085  |
| 15 | 0.3340 | 11.999 | 13.359 | 16.015 | 17.402 | 12.259 |
| 15 | 0.3350 | 10.965 | 9.880  | 13.897 | 21.107 | 13.991 |
| 15 | 0.3360 | 13.757 | 4.595  | 11.345 | 15.559 | 10.253 |

|    |        |        |        |        |        |        |
|----|--------|--------|--------|--------|--------|--------|
| 15 | 0.3370 | 7.107  | 11.729 | 13.676 | 14.612 | 3.646  |
| 15 | 0.3380 | 18.611 | 20.444 | 23.631 | 13.623 | 11.832 |
| 15 | 0.3390 | 19.281 | 13.963 | 18.168 | 23.584 | 21.788 |
| 15 | 0.3400 | 11.525 | 7.109  | 11.705 | 21.145 | 19.712 |
| 15 | 0.3410 | 6.249  | 5.101  | 7.185  | 13.168 | 7.474  |
| 15 | 0.3420 | 7.125  | 11.430 | 8.582  | 16.407 | 9.499  |
| 15 | 0.3430 | 8.246  | 13.591 | 7.924  | 14.561 | 10.731 |
| 15 | 0.3440 | 9.979  | 12.165 | 9.214  | 15.186 | 14.802 |
| 15 | 0.3450 | 15.146 | 16.501 | 12.794 | 20.403 | 8.834  |
| 15 | 0.3460 | 16.281 | 23.882 | 15.189 | 13.714 | 7.190  |
| 15 | 0.3470 | 12.070 | 17.089 | 13.336 | 15.841 | 19.259 |
| 15 | 0.3480 | 9.615  | 15.963 | 13.354 | 15.872 | 10.711 |
| 15 | 0.3490 | 21.720 | 22.508 | 25.584 | 10.081 | 8.596  |
| 15 | 0.3500 | 10.885 | 14.769 | 13.233 | 4.679  | 10.654 |
| 15 | 0.3510 | 14.000 | 14.191 | 17.583 | 22.227 | 15.028 |
| 15 | 0.3520 | 14.922 | 21.362 | 12.926 | 27.473 | 17.568 |
| 15 | 0.3530 | 17.416 | 19.730 | 22.771 | 21.017 | 15.818 |
| 15 | 0.3540 | 13.194 | 18.960 | 16.118 | 22.163 | 20.596 |
| 15 | 0.3550 | 23.806 | 30.824 | 21.890 | 21.081 | 15.343 |
| 15 | 0.3560 | 23.789 | 30.784 | 21.840 | 21.035 | 15.360 |
| 15 | 0.3570 | 18.473 | 28.264 | 19.942 | 16.769 | 16.804 |
| 15 | 0.3580 | 14.868 | 12.972 | 19.292 | 12.899 | 14.393 |
| 15 | 0.3590 | 25.616 | 26.509 | 31.754 | 14.815 | 23.941 |
| 15 | 0.3600 | 20.348 | 29.769 | 23.987 | 28.251 | 25.798 |
| 15 | 0.3610 | 5.105  | 6.131  | 4.124  | 18.913 | 6.777  |
| 15 | 0.3620 | 11.916 | 9.008  | 10.516 | 13.869 | 9.065  |
| 15 | 0.3630 | 7.097  | 5.224  | 4.935  | 8.662  | 5.459  |
| 15 | 0.3640 | 9.935  | 9.353  | 10.491 | 15.615 | 13.054 |
| 15 | 0.3650 | 14.764 | 28.092 | 22.526 | 26.620 | 9.046  |
| 15 | 0.3660 | 8.854  | 22.919 | 14.293 | 14.098 | 8.964  |
| 15 | 0.3670 | 13.214 | 14.397 | 17.492 | 16.607 | 14.094 |
| 15 | 0.3680 | 12.057 | 19.459 | 16.904 | 20.744 | 15.310 |
| 15 | 0.3690 | 3.767  | 3.361  | 3.936  | 7.240  | 7.309  |
| 15 | 0.3700 | 8.779  | 4.218  | 5.304  | 10.508 | 7.692  |
| 15 | 0.3710 | 5.693  | 9.562  | 6.655  | 10.296 | 6.270  |
| 15 | 0.3720 | 8.663  | 8.980  | 9.356  | 16.026 | 4.856  |
| 15 | 0.3730 | 3.871  | 9.507  | 5.276  | 14.340 | 5.767  |
| 15 | 0.3740 | 6.360  | 12.591 | 7.187  | 22.532 | 10.557 |
| 15 | 0.3750 | 9.397  | 13.631 | 8.849  | 18.269 | 9.879  |
| 15 | 0.3760 | 18.417 | 12.838 | 15.041 | 18.470 | 9.737  |
| 15 | 0.3770 | 17.903 | 22.367 | 17.001 | 29.328 | 15.779 |
| 15 | 0.3780 | 14.630 | 18.784 | 11.062 | 28.607 | 9.324  |
| 15 | 0.3790 | 24.505 | 26.505 | 27.381 | 21.244 | 6.894  |
| 15 | 0.3800 | 17.424 | 24.150 | 20.488 | 18.389 | 15.669 |
| 15 | 0.3810 | 18.213 | 23.474 | 21.452 | 26.899 | 23.185 |
| 15 | 0.3820 | 18.734 | 21.267 | 21.586 | 18.870 | 13.588 |
| 15 | 0.3830 | 13.459 | 20.564 | 15.667 | 10.136 | 6.137  |
| 15 | 0.3840 | 11.716 | 24.571 | 17.051 | 25.368 | 10.808 |
| 15 | 0.3850 | 10.990 | 16.511 | 12.549 | 12.494 | 10.199 |
| 15 | 0.3860 | 10.894 | 16.381 | 12.419 | 12.512 | 10.262 |

|    |        |        |        |        |        |        |
|----|--------|--------|--------|--------|--------|--------|
| 15 | 0.3870 | 10.616 | 11.359 | 11.296 | 20.635 | 13.700 |
| 15 | 0.3880 | 13.681 | 9.150  | 10.811 | 9.054  | 4.446  |
| 15 | 0.3890 | 10.861 | 7.041  | 8.101  | 9.140  | 12.463 |
| 15 | 0.3900 | 9.640  | 11.490 | 7.750  | 10.282 | 13.276 |
| 15 | 0.3910 | 9.328  | 18.619 | 13.448 | 8.743  | 2.690  |
| 15 | 0.3920 | 6.686  | 13.920 | 8.384  | 18.022 | 12.774 |
| 15 | 0.3930 | 8.592  | 15.447 | 7.283  | 19.912 | 20.504 |
| 15 | 0.3940 | 10.804 | 18.821 | 11.936 | 15.074 | 19.401 |
| 15 | 0.3950 | 17.875 | 19.970 | 16.555 | 16.334 | 11.522 |
| 15 | 0.3960 | 22.472 | 24.522 | 30.382 | 31.851 | 16.732 |
| 15 | 0.3970 | 12.665 | 27.314 | 22.167 | 19.460 | 11.921 |
| 15 | 0.3980 | 13.234 | 25.886 | 17.958 | 25.920 | 15.299 |
| 15 | 0.3990 | 17.176 | 28.606 | 21.278 | 23.370 | 10.268 |
| 15 | 0.4000 | 10.091 | 10.468 | 9.632  | 11.863 | 12.672 |
| 15 | 0.4010 | 6.936  | 11.630 | 8.749  | 13.254 | 8.900  |
| 15 | 0.4020 | 10.691 | 24.483 | 20.158 | 25.202 | 13.502 |
| 15 | 0.4030 | 8.188  | 9.240  | 7.286  | 20.700 | 14.457 |
| 15 | 0.4040 | 5.661  | 8.077  | 9.726  | 10.310 | 13.104 |
| 15 | 0.4050 | 5.632  | 6.923  | 8.496  | 9.377  | 8.528  |
| 15 | 0.4060 | 5.251  | 12.479 | 13.337 | 23.696 | 13.127 |
| 15 | 0.4070 | 5.171  | 14.269 | 11.883 | 21.018 | 9.292  |
| 15 | 0.4080 | 2.635  | 8.523  | 4.688  | 10.197 | 4.172  |
| 15 | 0.4090 | 4.578  | 2.880  | 5.044  | 13.453 | 5.971  |
| 15 | 0.4100 | 17.488 | 20.499 | 17.222 | 13.021 | 11.055 |
| 15 | 0.4110 | 11.666 | 21.733 | 19.960 | 15.544 | 14.143 |
| 15 | 0.4120 | 8.282  | 10.943 | 10.303 | 18.090 | 19.088 |
| 15 | 0.4130 | 10.812 | 7.722  | 4.930  | 15.290 | 16.649 |
| 15 | 0.4140 | 8.884  | 4.530  | 3.377  | 4.531  | 15.646 |
| 15 | 0.4150 | 11.029 | 15.281 | 11.696 | 3.507  | 14.344 |
| 15 | 0.4160 | 8.613  | 14.077 | 11.699 | 3.530  | 7.372  |
| 15 | 0.4170 | 8.615  | 14.079 | 11.705 | 3.530  | 7.373  |
| 15 | 0.4180 | 12.098 | 15.818 | 14.892 | 19.441 | 17.091 |
| 15 | 0.4190 | 16.381 | 19.874 | 16.516 | 19.194 | 14.679 |
| 15 | 0.4200 | 12.380 | 14.300 | 15.247 | 9.186  | 8.590  |
| 15 | 0.4210 | 13.823 | 17.592 | 12.125 | 12.656 | 9.273  |
| 15 | 0.4220 | 13.705 | 18.747 | 14.711 | 8.079  | 10.298 |
| 15 | 0.4230 | 20.377 | 20.909 | 19.490 | 14.274 | 17.578 |
| 15 | 0.4240 | 16.579 | 21.575 | 17.127 | 19.396 | 19.751 |
| 15 | 0.4250 | 14.168 | 15.289 | 8.072  | 14.173 | 19.657 |
| 15 | 0.4260 | 10.785 | 16.763 | 10.530 | 13.567 | 16.076 |
| 15 | 0.4270 | 12.111 | 19.002 | 12.883 | 12.313 | 16.041 |
| 15 | 0.4280 | 21.456 | 20.284 | 15.966 | 7.004  | 17.316 |
| 15 | 0.4290 | 17.775 | 20.612 | 12.754 | 13.258 | 15.828 |
| 15 | 0.4300 | 14.117 | 17.578 | 11.336 | 14.325 | 11.259 |
| 15 | 0.4310 | 14.221 | 17.581 | 11.342 | 14.353 | 11.220 |
| 15 | 0.4320 | 11.845 | 11.120 | 9.787  | 14.387 | 14.979 |
| 15 | 0.4330 | 6.320  | 5.761  | 3.831  | 12.520 | 8.862  |
| 15 | 0.4340 | 9.641  | 13.438 | 5.241  | 22.301 | 11.682 |
| 15 | 0.4350 | 8.892  | 8.555  | 4.279  | 19.235 | 13.491 |
| 15 | 0.4360 | 11.217 | 14.379 | 6.740  | 17.643 | 18.628 |

|    |        |        |        |        |        |        |
|----|--------|--------|--------|--------|--------|--------|
| 15 | 0.4370 | 18.741 | 14.778 | 19.224 | 20.706 | 15.792 |
| 15 | 0.4380 | 15.962 | 12.572 | 11.082 | 19.124 | 17.219 |
| 15 | 0.4390 | 13.014 | 10.655 | 6.771  | 17.647 | 19.014 |
| 15 | 0.4400 | 16.915 | 15.402 | 11.229 | 11.039 | 19.837 |
| 15 | 0.4410 | 16.910 | 15.386 | 11.217 | 11.045 | 19.838 |
| 15 | 0.4420 | 16.904 | 15.368 | 11.204 | 11.049 | 19.839 |
| 15 | 0.4430 | 16.898 | 15.349 | 11.191 | 11.053 | 19.840 |
| 15 | 0.4440 | 16.891 | 15.328 | 11.177 | 11.055 | 19.841 |
| 15 | 0.4450 | 10.405 | 12.049 | 7.343  | 9.169  | 15.975 |
| 15 | 0.4460 | 16.858 | 22.356 | 14.702 | 17.179 | 16.173 |
| 15 | 0.4470 | 29.935 | 28.530 | 24.911 | 16.674 | 12.767 |
| 15 | 0.4480 | 8.066  | 13.809 | 8.535  | 19.584 | 9.708  |
| 15 | 0.4490 | 13.992 | 19.807 | 12.695 | 15.118 | 11.480 |
| 15 | 0.4500 | 29.032 | 17.418 | 19.930 | 18.342 | 8.913  |
| 15 | 0.4510 | 14.202 | 12.403 | 7.445  | 9.462  | 12.532 |
| 15 | 0.4520 | 18.263 | 19.497 | 9.315  | 15.375 | 14.107 |
| 15 | 0.4530 | 7.323  | 8.459  | 5.592  | 15.339 | 25.805 |
| 15 | 0.4540 | 11.545 | 16.340 | 7.314  | 23.545 | 24.028 |
| 15 | 0.4550 | 13.737 | 24.343 | 14.618 | 20.374 | 17.792 |
| 15 | 0.4560 | 11.062 | 16.401 | 12.445 | 10.384 | 18.326 |
| 15 | 0.4570 | 16.672 | 20.695 | 17.952 | 19.222 | 16.862 |
| 15 | 0.4580 | 22.090 | 23.816 | 25.245 | 18.935 | 19.321 |
| 15 | 0.4590 | 12.075 | 19.100 | 20.331 | 9.796  | 15.582 |
| 15 | 0.4600 | 12.124 | 19.100 | 20.371 | 9.765  | 15.608 |
| 15 | 0.4610 | 4.600  | 15.064 | 6.524  | 14.632 | 11.855 |
| 15 | 0.4620 | 13.439 | 8.787  | 10.698 | 3.991  | 11.731 |
| 15 | 0.4630 | 13.528 | 8.960  | 10.803 | 4.073  | 11.620 |
| 15 | 0.4640 | 17.121 | 18.111 | 14.633 | 13.908 | 9.112  |
| 15 | 0.4650 | 11.703 | 14.409 | 12.921 | 9.320  | 10.964 |
| 15 | 0.4660 | 22.086 | 26.959 | 18.586 | 15.196 | 10.587 |
| 15 | 0.4670 | 19.015 | 27.807 | 19.353 | 12.764 | 11.787 |
| 15 | 0.4680 | 7.019  | 13.914 | 10.569 | 20.867 | 18.418 |
| 15 | 0.4690 | 7.255  | 11.692 | 7.281  | 23.646 | 20.433 |
| 15 | 0.4700 | 12.938 | 9.976  | 8.977  | 13.830 | 12.259 |
| 15 | 0.4710 | 18.885 | 15.662 | 15.073 | 9.741  | 9.337  |
| 15 | 0.4720 | 14.305 | 17.256 | 13.394 | 21.474 | 16.579 |
| 15 | 0.4730 | 16.152 | 10.833 | 10.679 | 18.707 | 11.138 |
| 15 | 0.4740 | 15.236 | 17.212 | 14.645 | 11.475 | 8.697  |
| 15 | 0.4750 | 10.381 | 10.361 | 9.964  | 18.940 | 14.926 |
| 15 | 0.4760 | 16.975 | 12.524 | 12.440 | 26.531 | 20.372 |
| 15 | 0.4770 | 14.820 | 16.395 | 14.707 | 30.040 | 18.423 |
| 15 | 0.4780 | 14.862 | 16.385 | 14.734 | 29.961 | 18.574 |
| 15 | 0.4790 | 10.294 | 17.247 | 12.247 | 21.505 | 11.999 |
| 15 | 0.4800 | 10.322 | 17.266 | 12.280 | 21.505 | 11.990 |
| 15 | 0.4810 | 3.962  | 2.933  | 8.877  | 10.196 | 20.730 |
| 15 | 0.4820 | 23.138 | 24.728 | 22.276 | 14.767 | 9.771  |
| 15 | 0.4830 | 10.671 | 15.948 | 7.611  | 14.258 | 23.364 |
| 15 | 0.4840 | 14.805 | 9.354  | 9.788  | 11.694 | 11.346 |
| 15 | 0.4850 | 18.746 | 8.529  | 14.050 | 11.715 | 8.996  |
| 15 | 0.4860 | 16.427 | 16.139 | 20.748 | 9.614  | 11.197 |

|    |        |        |        |        |        |        |
|----|--------|--------|--------|--------|--------|--------|
| 15 | 0.4870 | 8.232  | 11.172 | 12.343 | 21.738 | 14.831 |
| 15 | 0.4880 | 10.340 | 15.930 | 17.600 | 16.841 | 4.875  |
| 15 | 0.4890 | 25.453 | 18.325 | 23.565 | 16.476 | 10.561 |
| 15 | 0.4900 | 25.454 | 18.326 | 23.569 | 16.479 | 10.562 |
| 15 | 0.4910 | 6.320  | 6.020  | 6.053  | 0.601  | 5.256  |
| 15 | 0.4920 | 18.397 | 15.311 | 16.038 | 5.548  | 8.140  |
| 15 | 0.4930 | 39.406 | 21.252 | 20.218 | 15.130 | 10.755 |
| 15 | 0.4940 | 25.027 | 19.604 | 18.284 | 11.075 | 9.817  |
| 15 | 0.4950 | 26.887 | 11.033 | 8.752  | 9.372  | 8.128  |
| 15 | 0.4960 | 6.015  | 6.907  | 3.548  | 5.993  | 2.109  |
| 15 | 0.4970 | 23.429 | 18.402 | 20.851 | 16.357 | 4.942  |
| 15 | 0.4980 | 20.811 | 21.128 | 19.880 | 21.839 | 8.260  |
| 15 | 0.4990 | 21.710 | 25.541 | 27.868 | 8.134  | 6.592  |
| 15 | 0.5000 | 5.479  | 6.413  | 5.379  | 8.184  | 5.452  |
| 15 | 0.5010 | 43.096 | 34.359 | 34.418 | 5.752  | 5.053  |
| 15 | 0.5020 | 13.728 | 16.674 | 18.263 | 7.827  | 7.843  |
| 15 | 0.5030 | 37.730 | 37.140 | 28.497 | 15.886 | 9.564  |
| 15 | 0.5040 | 19.504 | 17.341 | 13.142 | 12.422 | 9.579  |
| 15 | 0.5050 | 13.446 | 23.391 | 10.179 | 15.051 | 11.774 |
| 15 | 0.5060 | 14.373 | 24.823 | 16.637 | 10.328 | 13.670 |
| 15 | 0.5070 | 9.464  | 15.674 | 13.979 | 6.187  | 10.893 |
| 15 | 0.5080 | 14.438 | 17.231 | 18.022 | 7.756  | 13.987 |
| 15 | 0.5090 | 12.792 | 16.311 | 14.723 | 11.260 | 14.426 |
| 15 | 0.5100 | 16.370 | 15.090 | 15.037 | 14.366 | 18.879 |
| 15 | 0.5110 | 21.775 | 24.828 | 19.119 | 18.052 | 8.749  |
| 15 | 0.5120 | 12.713 | 24.790 | 21.768 | 13.930 | 18.076 |
| 15 | 0.5130 | 6.244  | 16.190 | 14.856 | 10.836 | 16.723 |
| 15 | 0.5140 | 15.777 | 16.387 | 8.809  | 6.957  | 8.884  |
| 15 | 0.5150 | 6.581  | 12.996 | 7.034  | 9.759  | 5.216  |
| 15 | 0.5160 | 19.028 | 13.823 | 17.624 | 7.182  | 10.002 |
| 15 | 0.5170 | 12.709 | 16.645 | 16.128 | 13.506 | 17.009 |
| 15 | 0.5180 | 11.876 | 16.372 | 12.464 | 11.406 | 7.478  |
| 15 | 0.5190 | 14.057 | 7.932  | 10.717 | 7.035  | 5.869  |
| 15 | 0.5200 | 14.793 | 15.523 | 16.092 | 16.359 | 14.306 |
| 15 | 0.5210 | 12.055 | 17.933 | 14.834 | 15.918 | 10.968 |
| 15 | 0.5220 | 28.415 | 27.018 | 22.049 | 7.992  | 6.010  |
| 15 | 0.5230 | 22.886 | 21.509 | 20.835 | 13.811 | 12.534 |
| 15 | 0.5240 | 7.973  | 9.133  | 12.064 | 12.835 | 14.162 |
| 15 | 0.5250 | 12.131 | 11.785 | 7.654  | 7.045  | 5.701  |
| 15 | 0.5260 | 14.410 | 18.052 | 16.469 | 8.640  | 6.888  |
| 15 | 0.5270 | 14.240 | 12.986 | 14.944 | 11.854 | 13.914 |
| 15 | 0.5280 | 17.356 | 16.307 | 14.711 | 21.055 | 8.571  |
| 15 | 0.5290 | 14.557 | 6.202  | 12.898 | 8.648  | 13.423 |
| 15 | 0.5300 | 15.842 | 11.326 | 12.209 | 10.624 | 11.702 |
| 15 | 0.5310 | 13.334 | 9.636  | 10.663 | 15.801 | 15.122 |
| 15 | 0.5320 | 14.963 | 11.705 | 10.919 | 20.827 | 18.565 |
| 15 | 0.5330 | 10.866 | 9.732  | 11.432 | 16.911 | 13.909 |
| 15 | 0.5340 | 24.801 | 25.897 | 18.879 | 15.413 | 15.174 |
| 15 | 0.5350 | 26.314 | 21.631 | 20.483 | 14.141 | 9.391  |
| 15 | 0.5360 | 11.236 | 14.026 | 12.388 | 14.103 | 7.670  |



|    |        |        |        |        |        |        |
|----|--------|--------|--------|--------|--------|--------|
| 15 | 0.5370 | 15.726 | 18.944 | 13.159 | 14.188 | 9.873  |
| 15 | 0.5380 | 35.311 | 27.550 | 29.385 | 18.769 | 19.888 |
| 15 | 0.5390 | 16.531 | 17.726 | 19.071 | 16.880 | 19.518 |
| 15 | 0.5400 | 18.412 | 12.463 | 12.649 | 12.086 | 15.173 |
| 15 | 0.5410 | 22.055 | 19.617 | 22.024 | 14.397 | 24.491 |
| 15 | 0.5420 | 30.969 | 21.267 | 21.726 | 17.218 | 25.008 |
| 15 | 0.5430 | 28.255 | 23.191 | 28.862 | 19.818 | 18.837 |
| 15 | 0.5440 | 53.194 | 40.958 | 46.485 | 18.795 | 17.816 |
| 15 | 0.5450 | 25.972 | 20.488 | 19.754 | 11.204 | 10.635 |
| 15 | 0.5460 | 11.538 | 5.654  | 12.132 | 8.283  | 17.936 |
| 15 | 0.5470 | 19.606 | 9.103  | 17.873 | 9.219  | 17.239 |
| 15 | 0.5480 | 43.772 | 30.622 | 35.642 | 28.229 | 21.640 |
| 15 | 0.5490 | 32.766 | 28.556 | 31.701 | 25.482 | 13.045 |
| 15 | 0.5500 | 24.032 | 12.593 | 21.484 | 16.694 | 12.507 |
| 15 | 0.5510 | 24.193 | 23.574 | 28.345 | 18.082 | 26.698 |
| 15 | 0.5520 | 29.402 | 21.624 | 31.068 | 20.275 | 13.884 |
| 15 | 0.5530 | 22.228 | 14.039 | 23.962 | 13.309 | 7.138  |
| 15 | 0.5540 | 9.020  | 7.237  | 10.104 | 13.816 | 9.471  |
| 15 | 0.5550 | 13.243 | 9.670  | 13.628 | 15.809 | 7.714  |
| 15 | 0.5560 | 16.560 | 11.377 | 15.157 | 18.639 | 15.278 |
| 15 | 0.5570 | 33.401 | 24.760 | 26.933 | 30.025 | 22.505 |
| 15 | 0.5580 | 24.391 | 15.791 | 21.267 | 22.680 | 23.029 |
| 15 | 0.5590 | 8.759  | 9.656  | 11.390 | 19.493 | 16.738 |
| 15 | 0.5600 | 15.108 | 17.643 | 19.118 | 19.225 | 24.520 |
| 15 | 0.5610 | 35.140 | 25.917 | 31.746 | 19.541 | 30.545 |
| 15 | 0.5620 | 24.533 | 17.515 | 23.914 | 27.641 | 29.728 |
| 15 | 0.5630 | 23.767 | 16.237 | 14.592 | 6.486  | 26.138 |
| 15 | 0.5640 | 23.446 | 17.434 | 15.641 | 19.205 | 30.776 |
| 15 | 0.5650 | 35.918 | 26.702 | 32.136 | 22.015 | 22.248 |
| 15 | 0.5660 | 25.843 | 21.817 | 30.721 | 12.968 | 16.341 |
| 15 | 0.5670 | 23.660 | 16.829 | 23.575 | 12.473 | 16.466 |
| 15 | 0.5680 | 33.551 | 22.973 | 33.685 | 8.950  | 14.987 |
| 15 | 0.5690 | 34.483 | 21.113 | 25.081 | 5.936  | 24.748 |
| 15 | 0.5700 | 20.007 | 21.365 | 18.097 | 15.165 | 13.756 |
| 15 | 0.5710 | 20.163 | 16.259 | 16.707 | 16.352 | 20.277 |
| 15 | 0.5720 | 28.787 | 17.978 | 28.308 | 19.138 | 26.218 |
| 15 | 0.5730 | 20.135 | 16.795 | 20.159 | 10.107 | 14.630 |
| 15 | 0.5740 | 30.519 | 29.721 | 34.387 | 28.758 | 24.330 |
| 15 | 0.5750 | 30.108 | 28.677 | 32.355 | 33.430 | 20.474 |
| 15 | 0.5760 | 31.820 | 23.075 | 20.959 | 24.277 | 15.288 |
| 15 | 0.5770 | 31.944 | 25.097 | 22.147 | 10.159 | 14.867 |
| 15 | 0.5780 | 48.303 | 23.138 | 33.188 | 23.421 | 18.463 |
| 15 | 0.5790 | 39.823 | 27.346 | 30.624 | 22.148 | 19.159 |
| 15 | 0.5800 | 34.783 | 21.347 | 29.263 | 24.181 | 27.263 |
| 15 | 0.5810 | 39.839 | 26.786 | 38.060 | 10.504 | 19.574 |
| 15 | 0.5820 | 34.421 | 15.238 | 24.967 | 14.648 | 13.636 |
| 15 | 0.5830 | 38.704 | 19.028 | 27.483 | 8.672  | 19.142 |
| 15 | 0.5840 | 13.742 | 12.120 | 10.503 | 21.138 | 20.085 |
| 15 | 0.5850 | 23.623 | 15.351 | 15.465 | 20.901 | 9.449  |
| 15 | 0.5860 | 22.870 | 15.777 | 16.525 | 26.330 | 17.116 |

|    |        |        |        |        |        |        |
|----|--------|--------|--------|--------|--------|--------|
| 15 | 0.5870 | 12.829 | 15.643 | 13.948 | 18.901 | 21.903 |
| 15 | 0.5880 | 19.036 | 21.758 | 21.521 | 5.747  | 5.427  |
| 15 | 0.5890 | 32.290 | 20.448 | 26.391 | 1.786  | 6.241  |
| 15 | 0.5900 | 17.198 | 12.035 | 15.157 | 14.589 | 19.271 |
| 15 | 0.5910 | 15.950 | 17.179 | 14.366 | 18.691 | 16.698 |
| 15 | 0.5920 | 15.147 | 16.734 | 14.789 | 12.027 | 8.618  |
| 15 | 0.5930 | 7.109  | 15.898 | 11.113 | 15.555 | 9.438  |
| 15 | 0.5940 | 7.584  | 9.615  | 9.203  | 14.559 | 12.637 |
| 15 | 0.5950 | 4.233  | 8.075  | 7.670  | 8.039  | 17.335 |
| 15 | 0.5960 | 14.250 | 16.180 | 17.288 | 24.501 | 9.744  |
| 15 | 0.5970 | 13.800 | 13.633 | 9.633  | 11.670 | 11.060 |
| 15 | 0.5980 | 17.889 | 16.888 | 16.079 | 10.394 | 16.034 |
| 15 | 0.5990 | 23.012 | 23.475 | 20.832 | 29.621 | 17.756 |
| 15 | 0.6000 | 12.144 | 8.345  | 9.817  | 12.469 | 10.880 |
| 15 | 0.6010 | 14.308 | 14.191 | 14.130 | 15.441 | 12.721 |
| 15 | 0.6020 | 21.298 | 22.079 | 19.985 | 19.320 | 14.436 |
| 15 | 0.6030 | 26.104 | 27.861 | 25.721 | 19.605 | 13.209 |
| 15 | 0.6040 | 13.147 | 9.844  | 11.687 | 4.677  | 10.306 |
| 15 | 0.6050 | 5.838  | 8.251  | 4.503  | 15.756 | 13.343 |
| 15 | 0.6060 | 16.286 | 18.801 | 18.141 | 16.928 | 10.773 |
| 15 | 0.6070 | 10.594 | 11.355 | 6.988  | 25.371 | 13.271 |
| 15 | 0.6080 | 24.932 | 31.901 | 25.682 | 27.099 | 11.526 |
| 15 | 0.6090 | 23.005 | 23.262 | 18.119 | 18.889 | 20.016 |
| 15 | 0.6100 | 26.979 | 31.811 | 24.247 | 22.069 | 18.320 |
| 15 | 0.6110 | 21.806 | 26.606 | 25.000 | 15.348 | 17.514 |
| 15 | 0.6120 | 17.149 | 11.901 | 18.011 | 16.483 | 6.751  |
| 15 | 0.6130 | 16.153 | 7.100  | 8.526  | 10.639 | 7.379  |
| 15 | 0.6140 | 22.717 | 7.998  | 13.039 | 12.052 | 16.829 |
| 15 | 0.6150 | 9.815  | 3.947  | 8.760  | 9.388  | 14.566 |
| 15 | 0.6160 | 9.759  | 4.221  | 9.698  | 14.554 | 14.871 |
| 15 | 0.6170 | 28.878 | 17.345 | 25.138 | 28.347 | 16.276 |
| 15 | 0.6180 | 41.568 | 24.439 | 38.322 | 24.494 | 7.368  |
| 15 | 0.6190 | 16.361 | 15.333 | 17.096 | 14.776 | 13.266 |
| 15 | 0.6200 | 28.844 | 11.692 | 18.263 | 21.407 | 20.265 |
| 15 | 0.6210 | 12.955 | 20.771 | 14.918 | 25.157 | 16.750 |
| 15 | 0.6220 | 33.662 | 22.292 | 28.082 | 18.458 | 8.805  |
| 15 | 0.6230 | 11.296 | 15.151 | 7.950  | 25.380 | 9.227  |
| 15 | 0.6240 | 14.205 | 12.583 | 13.507 | 16.686 | 7.101  |
| 15 | 0.6250 | 28.318 | 16.787 | 23.248 | 21.866 | 18.396 |
| 15 | 0.6260 | 26.513 | 19.523 | 20.185 | 12.405 | 18.208 |
| 15 | 0.6270 | 24.019 | 23.717 | 16.838 | 19.757 | 14.077 |
| 15 | 0.6280 | 14.741 | 17.134 | 10.200 | 10.678 | 8.789  |
| 15 | 0.6290 | 23.366 | 17.488 | 16.557 | 11.609 | 19.460 |
| 15 | 0.6300 | 8.995  | 14.547 | 11.023 | 9.970  | 13.266 |
| 15 | 0.6310 | 11.829 | 17.523 | 11.635 | 10.090 | 8.413  |
| 15 | 0.6320 | 22.760 | 22.318 | 19.622 | 15.001 | 19.211 |
| 15 | 0.6330 | 20.935 | 15.116 | 15.709 | 2.290  | 3.779  |
| 15 | 0.6340 | 13.128 | 15.041 | 14.504 | 8.658  | 8.490  |
| 15 | 0.6350 | 15.129 | 16.770 | 18.999 | 12.939 | 4.333  |
| 15 | 0.6360 | 15.322 | 23.183 | 15.205 | 12.046 | 3.871  |

|    |        |        |        |        |        |        |
|----|--------|--------|--------|--------|--------|--------|
| 15 | 0.6370 | 18.989 | 18.529 | 14.346 | 22.439 | 14.581 |
| 15 | 0.6380 | 21.861 | 15.405 | 20.370 | 4.104  | 6.950  |
| 15 | 0.6390 | 17.278 | 12.598 | 15.786 | 7.921  | 13.530 |
| 15 | 0.6400 | 16.099 | 15.072 | 12.908 | 16.719 | 21.531 |
| 15 | 0.6410 | 11.245 | 18.566 | 17.718 | 18.927 | 9.309  |
| 15 | 0.6420 | 13.442 | 15.116 | 10.462 | 20.705 | 19.617 |
| 15 | 0.6430 | 14.963 | 12.190 | 10.100 | 16.622 | 16.584 |
| 15 | 0.6440 | 23.970 | 29.879 | 25.326 | 15.505 | 13.428 |
| 15 | 0.6450 | 26.492 | 19.114 | 24.911 | 13.286 | 11.266 |
| 15 | 0.6460 | 11.919 | 23.160 | 23.860 | 15.600 | 11.732 |
| 15 | 0.6470 | 9.288  | 16.769 | 8.574  | 12.224 | 17.188 |
| 15 | 0.6480 | 10.189 | 13.701 | 12.256 | 10.594 | 10.863 |
| 15 | 0.6490 | 9.499  | 7.882  | 9.568  | 10.321 | 13.671 |
| 15 | 0.6500 | 12.775 | 7.229  | 10.165 | 10.697 | 15.081 |
| 15 | 0.6510 | 22.042 | 15.038 | 13.614 | 14.419 | 7.794  |
| 15 | 0.6520 | 6.501  | 4.311  | 5.332  | 11.538 | 6.833  |
| 15 | 0.6530 | 5.951  | 8.718  | 7.214  | 13.276 | 8.591  |
| 15 | 0.6540 | 15.945 | 10.679 | 14.369 | 12.250 | 5.494  |
| 15 | 0.6550 | 15.932 | 10.583 | 14.288 | 12.234 | 5.495  |
| 15 | 0.6560 | 7.578  | 7.329  | 7.902  | 6.866  | 4.729  |
| 15 | 0.6570 | 6.122  | 5.431  | 4.744  | 8.648  | 8.416  |
| 15 | 0.6580 | 17.429 | 18.204 | 13.963 | 8.206  | 9.582  |
| 15 | 0.6590 | 4.303  | 7.696  | 6.674  | 11.124 | 5.445  |
| 15 | 0.6600 | 3.716  | 7.206  | 5.212  | 15.717 | 17.939 |
| 15 | 0.6610 | 10.535 | 9.570  | 9.074  | 12.470 | 18.186 |
| 15 | 0.6620 | 22.077 | 10.156 | 16.125 | 8.899  | 14.042 |
| 15 | 0.6630 | 18.659 | 14.166 | 17.040 | 23.793 | 18.581 |
| 15 | 0.6640 | 13.763 | 5.215  | 7.538  | 10.555 | 16.235 |
| 15 | 0.6650 | 9.631  | 5.739  | 9.116  | 6.553  | 11.008 |
| 15 | 0.6660 | 16.802 | 13.535 | 15.733 | 7.648  | 15.186 |
| 15 | 0.6670 | 21.930 | 13.266 | 22.100 | 11.666 | 12.174 |
| 15 | 0.6680 | 12.851 | 13.285 | 13.554 | 9.568  | 11.851 |
| 15 | 0.6690 | 16.971 | 13.243 | 21.015 | 17.353 | 10.723 |
| 15 | 0.6700 | 23.685 | 19.823 | 26.139 | 11.022 | 13.098 |
| 15 | 0.6710 | 7.734  | 4.655  | 6.427  | 3.271  | 8.624  |
| 15 | 0.6720 | 8.191  | 4.778  | 6.914  | 7.990  | 9.127  |
| 15 | 0.6730 | 40.594 | 36.930 | 36.486 | 16.126 | 18.363 |
| 15 | 0.6740 | 25.492 | 24.356 | 20.780 | 12.263 | 16.859 |
| 15 | 0.6750 | 20.368 | 29.019 | 25.367 | 15.088 | 10.451 |
| 15 | 0.6760 | 10.274 | 15.458 | 14.595 | 17.272 | 9.136  |
| 15 | 0.6770 | 7.344  | 12.409 | 10.531 | 6.518  | 17.633 |
| 15 | 0.6780 | 6.710  | 8.644  | 4.309  | 12.082 | 9.938  |
| 15 | 0.6790 | 18.932 | 19.577 | 19.028 | 11.297 | 8.291  |
| 15 | 0.6800 | 17.104 | 24.156 | 16.296 | 27.168 | 20.501 |
| 15 | 0.6810 | 14.359 | 18.232 | 20.112 | 19.029 | 25.122 |
| 15 | 0.6820 | 21.309 | 26.539 | 25.926 | 15.894 | 21.999 |
| 15 | 0.6830 | 23.918 | 28.036 | 21.980 | 13.766 | 4.771  |
| 15 | 0.6840 | 16.362 | 14.906 | 19.080 | 7.721  | 11.614 |
| 15 | 0.6850 | 15.143 | 16.833 | 18.156 | 15.579 | 13.389 |
| 15 | 0.6860 | 26.869 | 26.364 | 28.409 | 13.143 | 15.109 |

|    |        |        |        |        |        |        |
|----|--------|--------|--------|--------|--------|--------|
| 15 | 0.6870 | 23.043 | 27.081 | 23.097 | 11.128 | 13.242 |
| 15 | 0.6880 | 13.563 | 14.366 | 12.842 | 13.813 | 23.571 |
| 15 | 0.6890 | 12.014 | 11.613 | 10.682 | 7.302  | 6.797  |
| 15 | 0.6900 | 26.264 | 24.517 | 25.823 | 12.159 | 18.835 |
| 15 | 0.6910 | 20.142 | 14.638 | 20.446 | 11.476 | 5.960  |
| 15 | 0.6920 | 22.098 | 14.951 | 21.051 | 12.228 | 16.587 |
| 15 | 0.6930 | 16.130 | 16.622 | 18.865 | 5.748  | 11.631 |
| 15 | 0.6940 | 13.630 | 8.695  | 9.321  | 15.589 | 18.829 |
| 15 | 0.6950 | 34.264 | 35.753 | 31.349 | 13.234 | 8.729  |
| 15 | 0.6960 | 16.428 | 21.596 | 13.350 | 18.954 | 14.674 |
| 15 | 0.6970 | 21.643 | 21.142 | 18.854 | 12.966 | 16.566 |
| 15 | 0.6980 | 26.855 | 18.132 | 15.188 | 19.635 | 21.067 |
| 15 | 0.6990 | 17.159 | 12.589 | 14.730 | 9.151  | 29.917 |
| 15 | 0.7000 | 18.467 | 12.119 | 11.196 | 16.307 | 27.285 |
| 15 | 0.7010 | 10.337 | 8.521  | 12.002 | 26.414 | 15.884 |
| 15 | 0.7020 | 11.144 | 8.888  | 11.066 | 23.013 | 11.829 |
| 15 | 0.7030 | 11.294 | 10.174 | 12.137 | 10.682 | 5.214  |
| 15 | 0.7040 | 21.996 | 17.455 | 14.918 | 11.054 | 7.439  |
| 15 | 0.7050 | 18.273 | 14.522 | 19.744 | 20.435 | 8.509  |
| 15 | 0.7060 | 17.584 | 13.128 | 19.472 | 18.304 | 11.481 |
| 15 | 0.7070 | 16.824 | 16.867 | 23.929 | 19.264 | 24.873 |
| 15 | 0.7080 | 15.076 | 12.460 | 15.278 | 17.656 | 22.289 |
| 15 | 0.7090 | 13.999 | 10.211 | 10.752 | 20.663 | 14.303 |
| 15 | 0.7100 | 18.123 | 12.799 | 16.111 | 18.611 | 10.345 |
| 15 | 0.7110 | 7.095  | 6.076  | 5.089  | 9.909  | 9.752  |
| 15 | 0.7120 | 16.424 | 18.469 | 14.832 | 20.936 | 12.180 |
| 15 | 0.7130 | 13.969 | 17.113 | 16.931 | 7.103  | 8.306  |
| 15 | 0.7140 | 28.401 | 21.166 | 25.270 | 5.937  | 11.328 |
| 15 | 0.7150 | 14.855 | 16.594 | 13.254 | 17.389 | 13.338 |
| 15 | 0.7160 | 18.352 | 19.433 | 20.575 | 21.895 | 17.202 |
| 15 | 0.7170 | 27.743 | 18.188 | 26.844 | 18.381 | 13.403 |
| 15 | 0.7180 | 12.445 | 20.201 | 16.148 | 13.780 | 10.577 |
| 15 | 0.7190 | 15.884 | 16.653 | 16.773 | 21.620 | 16.982 |
| 15 | 0.7200 | 13.788 | 20.244 | 20.408 | 17.594 | 11.033 |
| 15 | 0.7210 | 18.833 | 17.040 | 22.184 | 14.825 | 7.002  |
| 15 | 0.7220 | 20.970 | 20.641 | 24.402 | 15.654 | 8.562  |
| 15 | 0.7230 | 12.831 | 13.040 | 12.042 | 13.152 | 8.797  |
| 15 | 0.7240 | 10.729 | 9.458  | 6.673  | 14.319 | 11.632 |
| 15 | 0.7250 | 11.115 | 11.724 | 11.719 | 23.504 | 19.869 |
| 15 | 0.7260 | 17.571 | 16.688 | 19.459 | 26.585 | 20.455 |
| 15 | 0.7270 | 14.621 | 19.835 | 19.370 | 19.102 | 17.654 |
| 15 | 0.7280 | 21.295 | 14.742 | 20.873 | 4.761  | 4.215  |
| 15 | 0.7290 | 7.493  | 11.686 | 5.760  | 20.799 | 12.369 |
| 15 | 0.7300 | 7.743  | 16.312 | 13.569 | 14.220 | 12.105 |
| 15 | 0.7310 | 12.780 | 18.004 | 18.100 | 11.234 | 10.147 |
| 15 | 0.7320 | 15.439 | 24.571 | 19.105 | 11.177 | 11.946 |
| 15 | 0.7330 | 8.505  | 14.533 | 8.867  | 19.494 | 9.085  |
| 15 | 0.7340 | 13.745 | 17.973 | 13.477 | 18.781 | 16.426 |
| 15 | 0.7350 | 10.386 | 8.567  | 6.777  | 10.970 | 11.523 |
| 15 | 0.7360 | 10.093 | 10.058 | 11.713 | 13.308 | 16.039 |

|    |        |        |        |        |        |        |
|----|--------|--------|--------|--------|--------|--------|
| 15 | 0.7370 | 16.911 | 17.009 | 17.243 | 7.942  | 13.264 |
| 15 | 0.7380 | 10.544 | 16.174 | 14.820 | 14.544 | 18.182 |
| 15 | 0.7390 | 21.478 | 21.333 | 20.958 | 21.617 | 14.636 |
| 15 | 0.7400 | 26.518 | 28.254 | 28.224 | 21.686 | 11.739 |
| 15 | 0.7410 | 21.449 | 27.370 | 18.441 | 27.396 | 14.398 |
| 15 | 0.7420 | 29.229 | 31.499 | 27.072 | 27.354 | 26.180 |
| 15 | 0.7430 | 19.741 | 29.371 | 20.919 | 15.815 | 14.719 |
| 15 | 0.7440 | 21.600 | 37.177 | 20.598 | 38.147 | 22.868 |
| 15 | 0.7450 | 23.187 | 31.868 | 26.506 | 27.077 | 10.637 |
| 15 | 0.7460 | 28.534 | 39.880 | 32.181 | 21.616 | 7.625  |
| 15 | 0.7470 | 20.704 | 24.641 | 28.652 | 29.990 | 20.881 |
| 15 | 0.7480 | 20.457 | 24.284 | 28.606 | 29.717 | 20.861 |
| 15 | 0.7490 | 32.311 | 38.273 | 35.375 | 27.378 | 19.016 |
| 15 | 0.7500 | 25.624 | 20.163 | 21.167 | 32.990 | 32.597 |
| 15 | 0.7510 | 25.755 | 19.897 | 21.438 | 32.677 | 32.737 |
| 15 | 0.7520 | 13.088 | 12.603 | 11.191 | 43.342 | 20.619 |
| 15 | 0.7530 | 18.894 | 14.393 | 10.754 | 29.923 | 12.488 |
| 15 | 0.7540 | 18.851 | 14.373 | 10.688 | 29.605 | 12.569 |
| 15 | 0.7550 | 24.100 | 14.115 | 14.062 | 32.389 | 19.711 |
| 15 | 0.7560 | 20.371 | 18.148 | 20.525 | 20.721 | 14.373 |
| 15 | 0.7570 | 16.523 | 15.442 | 16.059 | 22.650 | 9.731  |
| 15 | 0.7580 | 15.235 | 13.285 | 15.601 | 16.496 | 16.857 |
| 15 | 0.7590 | 12.742 | 20.445 | 13.423 | 28.398 | 15.563 |
| 15 | 0.7600 | 5.279  | 15.706 | 9.255  | 31.161 | 23.099 |
| 15 | 0.7610 | 13.014 | 18.542 | 10.303 | 29.971 | 28.671 |
| 15 | 0.7620 | 8.390  | 7.794  | 10.006 | 15.981 | 12.044 |
| 15 | 0.7630 | 7.796  | 9.640  | 7.298  | 21.494 | 10.083 |
| 15 | 0.7640 | 7.732  | 9.554  | 7.191  | 21.063 | 9.922  |
| 15 | 0.7650 | 8.026  | 4.099  | 7.006  | 10.921 | 13.768 |
| 15 | 0.7660 | 8.454  | 6.957  | 6.064  | 7.317  | 13.109 |
| 15 | 0.7670 | 11.727 | 18.155 | 12.478 | 21.710 | 15.672 |
| 15 | 0.7680 | 15.617 | 16.827 | 19.090 | 16.665 | 18.749 |
| 15 | 0.7690 | 12.388 | 10.554 | 10.880 | 13.784 | 10.623 |
| 15 | 0.7700 | 36.788 | 32.382 | 31.634 | 14.033 | 17.333 |
| 15 | 0.7710 | 17.781 | 15.009 | 18.867 | 12.820 | 11.985 |
| 15 | 0.7720 | 18.282 | 13.620 | 11.935 | 16.499 | 14.258 |
| 15 | 0.7730 | 19.007 | 11.775 | 10.409 | 16.033 | 27.834 |
| 15 | 0.7740 | 25.899 | 19.564 | 13.802 | 15.952 | 24.728 |
| 15 | 0.7750 | 19.033 | 24.020 | 16.521 | 19.716 | 12.309 |
| 15 | 0.7760 | 10.191 | 13.505 | 17.933 | 10.257 | 13.210 |
| 15 | 0.7770 | 12.861 | 14.697 | 11.326 | 10.163 | 22.095 |
| 15 | 0.7780 | 13.273 | 20.056 | 14.357 | 11.046 | 22.087 |
| 15 | 0.7790 | 24.018 | 26.266 | 27.699 | 12.647 | 24.693 |
| 15 | 0.7800 | 12.914 | 14.708 | 17.805 | 12.988 | 17.739 |
| 15 | 0.7810 | 16.833 | 23.963 | 21.876 | 12.742 | 13.773 |
| 15 | 0.7820 | 21.171 | 33.165 | 27.234 | 13.297 | 9.025  |
| 15 | 0.7830 | 21.459 | 18.206 | 20.071 | 15.118 | 11.133 |
| 15 | 0.7840 | 9.330  | 11.142 | 12.121 | 9.796  | 7.526  |
| 15 | 0.7850 | 8.645  | 9.144  | 11.843 | 9.965  | 19.330 |
| 15 | 0.7860 | 17.997 | 11.657 | 15.374 | 3.338  | 11.179 |

|    |        |        |        |        |        |        |
|----|--------|--------|--------|--------|--------|--------|
| 15 | 0.7870 | 11.187 | 12.128 | 9.403  | 6.740  | 12.899 |
| 15 | 0.7880 | 14.564 | 16.036 | 12.743 | 7.870  | 11.002 |
| 15 | 0.7890 | 12.541 | 15.804 | 13.932 | 18.733 | 37.777 |
| 15 | 0.7900 | 0.000  | 0.000  | 0.000  | 0.000  | 0.000  |
| 16 | 0.0009 | 0.000  | 0.000  | 0.000  | 0.000  | 0.000  |
| 16 | 0.0019 | 19.504 | 16.946 | 20.450 | 9.001  | 20.320 |
| 16 | 0.0029 | 17.884 | 19.729 | 22.523 | 14.893 | 15.311 |
| 16 | 0.0039 | 21.608 | 29.626 | 29.680 | 14.942 | 20.522 |
| 16 | 0.0049 | 12.421 | 15.977 | 11.022 | 16.333 | 30.607 |
| 16 | 0.0059 | 25.159 | 24.481 | 23.591 | 6.104  | 29.021 |
| 16 | 0.0069 | 27.377 | 26.105 | 20.258 | 20.119 | 23.667 |
| 16 | 0.0079 | 30.240 | 29.873 | 31.015 | 24.209 | 21.030 |
| 16 | 0.0089 | 38.247 | 20.190 | 33.921 | 21.306 | 33.223 |
| 16 | 0.0099 | 21.306 | 16.692 | 21.688 | 13.910 | 25.227 |
| 16 | 0.0109 | 31.009 | 24.857 | 33.603 | 5.599  | 9.792  |
| 16 | 0.0119 | 33.878 | 27.143 | 26.592 | 17.047 | 32.033 |
| 16 | 0.0129 | 27.693 | 30.005 | 32.688 | 20.289 | 9.494  |
| 16 | 0.0139 | 30.846 | 32.705 | 33.796 | 8.542  | 12.658 |
| 16 | 0.0149 | 15.729 | 18.872 | 15.017 | 13.009 | 34.224 |
| 16 | 0.0159 | 15.882 | 20.137 | 20.662 | 22.641 | 38.727 |
| 16 | 0.0169 | 17.840 | 9.773  | 10.448 | 15.584 | 34.520 |
| 16 | 0.0179 | 15.808 | 10.183 | 18.144 | 20.038 | 31.613 |
| 16 | 0.0189 | 14.462 | 14.623 | 16.173 | 7.620  | 20.359 |
| 16 | 0.0199 | 16.194 | 18.522 | 17.829 | 17.274 | 24.201 |
| 16 | 0.0209 | 24.333 | 28.446 | 29.627 | 14.572 | 30.580 |
| 16 | 0.0219 | 27.009 | 38.852 | 33.020 | 24.676 | 15.851 |
| 16 | 0.0229 | 4.722  | 8.700  | 11.697 | 12.693 | 13.764 |
| 16 | 0.0239 | 8.332  | 18.577 | 13.517 | 14.429 | 13.885 |
| 16 | 0.0249 | 9.374  | 12.203 | 8.443  | 14.131 | 11.940 |
| 16 | 0.0259 | 13.484 | 14.604 | 11.178 | 11.330 | 18.778 |
| 16 | 0.0269 | 22.545 | 23.982 | 32.301 | 7.039  | 14.439 |
| 16 | 0.0279 | 24.166 | 29.588 | 31.596 | 11.133 | 12.814 |
| 16 | 0.0289 | 18.916 | 24.371 | 20.519 | 10.462 | 24.628 |
| 16 | 0.0299 | 19.151 | 20.137 | 24.843 | 24.180 | 23.648 |
| 16 | 0.0309 | 19.918 | 19.229 | 27.213 | 18.294 | 20.176 |
| 16 | 0.0319 | 17.464 | 14.339 | 15.921 | 14.127 | 16.777 |
| 16 | 0.0329 | 24.421 | 16.512 | 12.278 | 12.405 | 12.060 |
| 16 | 0.0339 | 17.004 | 19.963 | 15.139 | 11.231 | 10.587 |
| 16 | 0.0349 | 16.830 | 12.399 | 18.427 | 11.705 | 22.057 |
| 16 | 0.0359 | 12.199 | 16.916 | 14.925 | 17.849 | 13.741 |
| 16 | 0.0369 | 9.390  | 17.794 | 12.180 | 24.888 | 20.839 |
| 16 | 0.0379 | 16.274 | 19.464 | 20.625 | 19.547 | 24.407 |
| 16 | 0.0389 | 13.982 | 19.988 | 18.608 | 20.079 | 21.848 |
| 16 | 0.0399 | 12.077 | 9.875  | 12.436 | 21.070 | 23.466 |
| 16 | 0.0409 | 17.447 | 13.387 | 18.894 | 27.796 | 27.434 |
| 16 | 0.0419 | 9.341  | 19.572 | 10.973 | 24.914 | 17.901 |
| 16 | 0.0429 | 19.244 | 11.170 | 15.782 | 14.752 | 19.305 |
| 16 | 0.0439 | 19.192 | 11.094 | 15.853 | 14.668 | 19.466 |
| 16 | 0.0449 | 24.849 | 21.179 | 17.718 | 21.747 | 21.651 |
| 16 | 0.0459 | 8.818  | 13.704 | 9.847  | 21.670 | 16.229 |

|    |        |        |        |        |        |        |
|----|--------|--------|--------|--------|--------|--------|
| 16 | 0.0469 | 14.242 | 13.653 | 16.533 | 13.634 | 12.924 |
| 16 | 0.0479 | 11.986 | 14.219 | 10.911 | 17.061 | 14.136 |
| 16 | 0.0489 | 10.944 | 18.334 | 15.558 | 18.226 | 20.501 |
| 16 | 0.0499 | 14.422 | 20.816 | 17.689 | 20.798 | 15.917 |
| 16 | 0.0509 | 14.929 | 20.484 | 17.665 | 20.637 | 15.745 |
| 16 | 0.0519 | 15.807 | 15.157 | 17.013 | 24.757 | 22.128 |
| 16 | 0.0529 | 10.698 | 11.991 | 11.746 | 12.869 | 10.275 |
| 16 | 0.0539 | 8.562  | 11.070 | 15.044 | 5.906  | 5.499  |
| 16 | 0.0549 | 14.428 | 15.935 | 13.573 | 23.498 | 18.337 |
| 16 | 0.0559 | 15.019 | 12.679 | 14.985 | 19.403 | 13.631 |
| 16 | 0.0569 | 11.123 | 11.899 | 10.215 | 23.717 | 9.849  |
| 16 | 0.0579 | 17.016 | 14.179 | 16.508 | 23.115 | 11.969 |
| 16 | 0.0589 | 11.790 | 9.368  | 8.632  | 18.868 | 14.767 |
| 16 | 0.0599 | 11.284 | 13.186 | 11.906 | 13.507 | 13.300 |
| 16 | 0.0609 | 22.282 | 22.633 | 17.378 | 15.219 | 16.446 |
| 16 | 0.0619 | 23.168 | 23.259 | 19.972 | 12.857 | 15.946 |
| 16 | 0.0629 | 16.969 | 17.757 | 15.689 | 12.603 | 12.822 |
| 16 | 0.0639 | 11.431 | 11.970 | 12.464 | 21.286 | 21.796 |
| 16 | 0.0649 | 16.640 | 17.349 | 17.136 | 18.072 | 11.145 |
| 16 | 0.0659 | 21.897 | 27.030 | 21.324 | 10.880 | 24.050 |
| 16 | 0.0669 | 11.482 | 10.369 | 11.862 | 9.962  | 10.478 |
| 16 | 0.0679 | 19.715 | 10.712 | 17.472 | 12.698 | 11.664 |
| 16 | 0.0689 | 9.895  | 8.434  | 12.087 | 10.057 | 11.275 |
| 16 | 0.0699 | 16.861 | 13.567 | 10.155 | 10.769 | 17.812 |
| 16 | 0.0709 | 10.073 | 13.901 | 6.791  | 15.734 | 17.984 |
| 16 | 0.0719 | 9.554  | 11.928 | 6.674  | 26.170 | 13.323 |
| 16 | 0.0729 | 19.570 | 20.763 | 18.269 | 26.550 | 17.797 |
| 16 | 0.0739 | 20.868 | 21.434 | 18.537 | 21.348 | 12.745 |
| 16 | 0.0749 | 31.163 | 17.020 | 26.223 | 17.485 | 9.507  |
| 16 | 0.0759 | 21.858 | 16.115 | 15.844 | 13.015 | 9.848  |
| 16 | 0.0769 | 20.858 | 25.246 | 14.496 | 15.015 | 7.207  |
| 16 | 0.0779 | 17.918 | 16.644 | 15.660 | 23.089 | 14.255 |
| 16 | 0.0789 | 17.538 | 17.635 | 16.394 | 22.965 | 17.103 |
| 16 | 0.0799 | 13.282 | 9.335  | 16.293 | 19.809 | 5.402  |
| 16 | 0.0809 | 10.679 | 8.373  | 11.643 | 9.929  | 16.539 |
| 16 | 0.0819 | 8.958  | 8.233  | 11.716 | 9.086  | 17.220 |
| 16 | 0.0829 | 12.537 | 12.272 | 13.555 | 28.566 | 22.991 |
| 16 | 0.0839 | 18.440 | 18.905 | 15.413 | 20.313 | 17.007 |
| 16 | 0.0849 | 29.382 | 21.009 | 20.904 | 21.852 | 19.481 |
| 16 | 0.0859 | 20.273 | 21.733 | 19.612 | 23.329 | 15.581 |
| 16 | 0.0869 | 17.381 | 20.962 | 16.777 | 18.515 | 15.927 |
| 16 | 0.0879 | 10.455 | 13.502 | 20.071 | 11.096 | 18.471 |
| 16 | 0.0889 | 18.941 | 21.341 | 17.267 | 17.294 | 33.937 |
| 16 | 0.0899 | 10.294 | 9.367  | 13.613 | 17.016 | 22.001 |
| 16 | 0.0909 | 13.529 | 11.865 | 17.078 | 17.762 | 15.381 |
| 16 | 0.0919 | 24.238 | 22.167 | 29.663 | 18.100 | 27.053 |
| 16 | 0.0929 | 18.234 | 9.663  | 13.898 | 19.945 | 18.142 |
| 16 | 0.0939 | 24.089 | 25.456 | 26.039 | 24.341 | 29.053 |
| 16 | 0.0949 | 15.639 | 19.831 | 16.844 | 14.776 | 17.153 |
| 16 | 0.0959 | 16.164 | 15.361 | 12.009 | 15.057 | 17.775 |

|    |        |        |        |        |        |        |
|----|--------|--------|--------|--------|--------|--------|
| 16 | 0.0969 | 14.753 | 17.069 | 16.030 | 18.571 | 11.348 |
| 16 | 0.0979 | 20.888 | 17.697 | 25.904 | 12.621 | 15.591 |
| 16 | 0.0989 | 9.531  | 9.203  | 14.050 | 8.044  | 9.637  |
| 16 | 0.0999 | 6.687  | 8.064  | 7.580  | 12.104 | 10.525 |
| 16 | 0.1009 | 12.190 | 11.646 | 16.551 | 8.030  | 18.111 |
| 16 | 0.1019 | 14.814 | 17.039 | 21.975 | 25.403 | 13.630 |
| 16 | 0.1029 | 19.918 | 13.270 | 20.324 | 21.136 | 13.962 |
| 16 | 0.1039 | 14.991 | 18.726 | 20.055 | 16.236 | 16.703 |
| 16 | 0.1049 | 15.433 | 26.992 | 25.974 | 20.196 | 9.771  |
| 16 | 0.1059 | 13.239 | 18.504 | 12.409 | 15.316 | 12.840 |
| 16 | 0.1069 | 13.619 | 18.704 | 12.686 | 15.749 | 12.668 |
| 16 | 0.1079 | 18.231 | 16.497 | 18.790 | 8.603  | 15.191 |
| 16 | 0.1089 | 15.986 | 18.538 | 16.530 | 20.421 | 25.172 |
| 16 | 0.1099 | 13.781 | 21.637 | 13.987 | 24.235 | 14.062 |
| 16 | 0.1109 | 21.754 | 29.507 | 24.915 | 30.482 | 18.022 |
| 16 | 0.1119 | 22.284 | 29.676 | 28.497 | 13.944 | 14.893 |
| 16 | 0.1129 | 20.632 | 23.277 | 18.653 | 31.255 | 13.601 |
| 16 | 0.1139 | 15.807 | 31.627 | 15.362 | 31.112 | 9.229  |
| 16 | 0.1149 | 31.917 | 33.285 | 27.371 | 28.716 | 23.954 |
| 16 | 0.1159 | 22.652 | 31.521 | 18.369 | 17.097 | 13.375 |
| 16 | 0.1169 | 19.314 | 24.646 | 19.429 | 23.001 | 11.483 |
| 16 | 0.1179 | 23.936 | 24.500 | 26.467 | 18.776 | 9.991  |
| 16 | 0.1189 | 8.738  | 17.935 | 11.100 | 28.966 | 4.797  |
| 16 | 0.1199 | 25.518 | 26.246 | 16.516 | 29.325 | 7.138  |
| 16 | 0.1209 | 16.759 | 20.955 | 20.806 | 10.535 | 10.542 |
| 16 | 0.1219 | 20.838 | 25.105 | 16.897 | 8.857  | 9.648  |
| 16 | 0.1229 | 19.475 | 12.988 | 14.224 | 14.233 | 5.957  |
| 16 | 0.1239 | 5.068  | 6.073  | 4.980  | 22.334 | 7.257  |
| 16 | 0.1249 | 33.516 | 31.196 | 28.279 | 16.181 | 11.358 |
| 16 | 0.1259 | 13.880 | 11.873 | 11.881 | 8.680  | 9.697  |
| 16 | 0.1269 | 11.898 | 15.023 | 11.356 | 10.854 | 13.986 |
| 16 | 0.1279 | 12.131 | 14.687 | 9.398  | 14.058 | 13.247 |
| 16 | 0.1289 | 18.204 | 22.724 | 19.212 | 14.910 | 22.737 |
| 16 | 0.1299 | 32.304 | 24.406 | 30.189 | 16.023 | 11.512 |
| 16 | 0.1309 | 20.374 | 20.208 | 24.147 | 18.424 | 10.487 |
| 16 | 0.1319 | 19.374 | 13.885 | 17.651 | 9.867  | 14.152 |
| 16 | 0.1329 | 12.156 | 21.845 | 15.085 | 12.740 | 20.136 |
| 16 | 0.1339 | 14.627 | 17.325 | 17.234 | 16.905 | 6.916  |
| 16 | 0.1349 | 14.685 | 17.498 | 17.322 | 17.046 | 7.003  |
| 16 | 0.1359 | 17.313 | 22.303 | 18.193 | 22.270 | 13.076 |
| 16 | 0.1369 | 10.959 | 10.999 | 11.288 | 14.932 | 9.463  |
| 16 | 0.1379 | 7.037  | 12.523 | 6.742  | 25.998 | 13.910 |
| 16 | 0.1389 | 12.178 | 16.984 | 14.929 | 20.080 | 16.236 |
| 16 | 0.1399 | 12.738 | 6.919  | 8.994  | 17.020 | 6.229  |
| 16 | 0.1409 | 11.613 | 6.652  | 8.631  | 19.708 | 7.062  |
| 16 | 0.1419 | 18.069 | 16.498 | 16.312 | 17.585 | 13.122 |
| 16 | 0.1429 | 33.924 | 22.061 | 27.231 | 24.160 | 13.246 |
| 16 | 0.1439 | 19.798 | 13.443 | 13.773 | 16.251 | 17.851 |
| 16 | 0.1449 | 17.332 | 16.260 | 17.125 | 14.322 | 16.340 |
| 16 | 0.1459 | 12.723 | 18.118 | 14.463 | 17.696 | 11.194 |



|    |        |        |        |        |        |        |
|----|--------|--------|--------|--------|--------|--------|
| 16 | 0.1469 | 10.459 | 20.436 | 13.213 | 17.832 | 13.497 |
| 16 | 0.1479 | 21.185 | 23.678 | 21.411 | 18.065 | 19.080 |
| 16 | 0.1489 | 9.586  | 19.307 | 12.591 | 14.744 | 11.101 |
| 16 | 0.1499 | 30.295 | 20.331 | 14.459 | 18.492 | 16.440 |
| 16 | 0.1509 | 33.002 | 18.261 | 14.923 | 10.588 | 14.671 |
| 16 | 0.1519 | 14.378 | 15.080 | 12.195 | 12.242 | 22.203 |
| 16 | 0.1529 | 14.977 | 9.790  | 12.685 | 10.960 | 17.419 |
| 16 | 0.1539 | 11.436 | 17.028 | 14.008 | 14.552 | 20.480 |
| 16 | 0.1549 | 17.559 | 26.746 | 19.808 | 29.240 | 21.283 |
| 16 | 0.1559 | 23.355 | 27.680 | 24.615 | 10.555 | 8.537  |
| 16 | 0.1569 | 14.151 | 13.868 | 14.164 | 21.131 | 14.880 |
| 16 | 0.1579 | 26.349 | 28.625 | 30.328 | 13.841 | 6.913  |
| 16 | 0.1589 | 27.510 | 29.823 | 29.211 | 12.062 | 7.831  |
| 16 | 0.1599 | 13.727 | 16.770 | 13.754 | 17.281 | 10.693 |
| 16 | 0.1609 | 23.528 | 23.055 | 19.027 | 24.831 | 12.374 |
| 16 | 0.1619 | 12.013 | 12.090 | 8.946  | 13.244 | 13.861 |
| 16 | 0.1629 | 23.642 | 12.329 | 20.330 | 14.527 | 15.641 |
| 16 | 0.1639 | 26.010 | 23.160 | 23.275 | 17.789 | 14.896 |
| 16 | 0.1649 | 17.095 | 28.528 | 17.791 | 15.980 | 17.765 |
| 16 | 0.1659 | 20.143 | 9.708  | 14.272 | 16.368 | 19.982 |
| 16 | 0.1669 | 11.143 | 6.863  | 10.154 | 11.396 | 13.686 |
| 16 | 0.1679 | 21.855 | 17.313 | 18.631 | 16.446 | 10.289 |
| 16 | 0.1689 | 23.029 | 16.443 | 21.676 | 12.837 | 8.959  |
| 16 | 0.1699 | 26.855 | 14.967 | 14.273 | 19.021 | 11.060 |
| 16 | 0.1709 | 24.931 | 17.763 | 19.001 | 21.342 | 22.374 |
| 16 | 0.1719 | 25.758 | 28.483 | 20.613 | 12.365 | 11.078 |
| 16 | 0.1729 | 21.991 | 16.042 | 16.162 | 23.477 | 20.497 |
| 16 | 0.1739 | 25.058 | 19.398 | 17.012 | 14.474 | 15.572 |
| 16 | 0.1749 | 28.070 | 17.497 | 21.238 | 9.257  | 11.221 |
| 16 | 0.1759 | 24.767 | 21.214 | 23.089 | 13.403 | 18.542 |
| 16 | 0.1769 | 12.083 | 15.485 | 15.333 | 16.269 | 13.294 |
| 16 | 0.1779 | 15.469 | 13.488 | 13.975 | 12.623 | 10.163 |
| 16 | 0.1789 | 7.495  | 12.796 | 8.338  | 16.807 | 7.198  |
| 16 | 0.1799 | 12.693 | 13.872 | 10.251 | 16.393 | 8.123  |
| 16 | 0.1809 | 43.158 | 30.843 | 31.268 | 16.800 | 10.756 |
| 16 | 0.1819 | 17.329 | 17.395 | 20.329 | 17.274 | 11.076 |
| 16 | 0.1829 | 29.000 | 28.869 | 21.940 | 22.454 | 11.779 |
| 16 | 0.1839 | 15.264 | 18.627 | 12.334 | 13.924 | 11.165 |
| 16 | 0.1849 | 28.880 | 25.716 | 20.682 | 13.038 | 7.415  |
| 16 | 0.1859 | 38.171 | 30.939 | 22.318 | 21.275 | 20.697 |
| 16 | 0.1869 | 14.514 | 17.459 | 12.671 | 16.404 | 10.673 |
| 16 | 0.1879 | 14.483 | 17.383 | 12.496 | 16.234 | 10.859 |
| 16 | 0.1889 | 14.590 | 15.069 | 14.848 | 12.488 | 9.517  |
| 16 | 0.1899 | 9.294  | 20.483 | 12.938 | 12.521 | 6.954  |
| 16 | 0.1909 | 17.853 | 15.831 | 14.521 | 7.067  | 10.960 |
| 16 | 0.1919 | 15.297 | 11.941 | 10.787 | 11.760 | 14.092 |
| 16 | 0.1929 | 16.604 | 7.367  | 12.171 | 21.953 | 20.782 |
| 16 | 0.1939 | 19.162 | 18.293 | 19.238 | 18.213 | 10.128 |
| 16 | 0.1949 | 20.119 | 27.832 | 18.947 | 16.822 | 5.046  |
| 16 | 0.1959 | 13.061 | 21.497 | 15.632 | 18.379 | 10.833 |

|    |        |        |        |        |        |        |
|----|--------|--------|--------|--------|--------|--------|
| 16 | 0.1969 | 17.073 | 15.698 | 16.244 | 16.548 | 9.959  |
| 16 | 0.1979 | 14.963 | 10.708 | 10.937 | 14.312 | 10.037 |
| 16 | 0.1989 | 20.347 | 10.446 | 14.179 | 19.201 | 8.500  |
| 16 | 0.1999 | 22.622 | 17.057 | 16.134 | 10.855 | 8.650  |
| 16 | 0.2009 | 13.782 | 18.115 | 16.141 | 13.515 | 5.451  |
| 16 | 0.2019 | 16.660 | 17.028 | 15.248 | 15.449 | 8.094  |
| 16 | 0.2029 | 15.514 | 20.967 | 15.323 | 25.555 | 13.357 |
| 16 | 0.2039 | 8.744  | 16.042 | 11.983 | 26.199 | 10.291 |
| 16 | 0.2049 | 15.633 | 13.293 | 15.938 | 15.272 | 10.581 |
| 16 | 0.2059 | 11.347 | 21.129 | 13.956 | 21.812 | 10.315 |
| 16 | 0.2069 | 11.780 | 19.156 | 13.071 | 21.989 | 9.885  |
| 16 | 0.2079 | 15.047 | 21.392 | 13.611 | 23.610 | 12.387 |
| 16 | 0.2089 | 16.233 | 11.421 | 15.135 | 14.273 | 14.615 |
| 16 | 0.2099 | 13.676 | 16.848 | 10.090 | 15.001 | 12.574 |
| 16 | 0.2109 | 5.536  | 10.184 | 6.756  | 25.419 | 16.885 |
| 16 | 0.2119 | 10.248 | 18.998 | 17.854 | 15.964 | 11.309 |
| 16 | 0.2129 | 6.003  | 10.780 | 7.019  | 12.582 | 13.006 |
| 16 | 0.2139 | 11.238 | 17.484 | 13.112 | 11.279 | 17.869 |
| 16 | 0.2149 | 10.551 | 17.501 | 9.841  | 18.200 | 16.086 |
| 16 | 0.2159 | 29.716 | 24.544 | 26.251 | 13.052 | 23.589 |
| 16 | 0.2169 | 17.479 | 13.018 | 11.715 | 14.786 | 10.593 |
| 16 | 0.2179 | 15.611 | 16.809 | 12.343 | 17.131 | 3.003  |
| 16 | 0.2189 | 5.753  | 10.109 | 7.273  | 7.906  | 3.035  |
| 16 | 0.2199 | 11.401 | 19.293 | 14.088 | 15.894 | 5.851  |
| 16 | 0.2209 | 13.656 | 20.509 | 12.295 | 14.251 | 9.974  |
| 16 | 0.2219 | 11.686 | 18.941 | 10.992 | 10.848 | 10.683 |
| 16 | 0.2229 | 4.838  | 10.638 | 4.752  | 9.176  | 6.477  |
| 16 | 0.2239 | 7.190  | 9.527  | 6.408  | 13.426 | 5.441  |
| 16 | 0.2249 | 7.111  | 9.756  | 6.458  | 13.873 | 5.205  |
| 16 | 0.2259 | 10.533 | 17.408 | 15.343 | 17.652 | 4.084  |
| 16 | 0.2269 | 13.433 | 18.119 | 14.778 | 17.549 | 8.226  |
| 16 | 0.2279 | 14.373 | 12.251 | 13.952 | 10.630 | 9.951  |
| 16 | 0.2289 | 4.960  | 5.078  | 3.983  | 5.807  | 4.339  |
| 16 | 0.2299 | 11.344 | 15.719 | 12.195 | 16.480 | 6.075  |
| 16 | 0.2309 | 12.446 | 18.781 | 15.393 | 14.536 | 9.729  |
| 16 | 0.2319 | 13.760 | 22.645 | 14.478 | 27.219 | 10.098 |
| 16 | 0.2329 | 18.656 | 26.194 | 23.978 | 16.870 | 6.195  |
| 16 | 0.2339 | 20.263 | 28.174 | 27.001 | 17.349 | 6.297  |
| 16 | 0.2349 | 14.403 | 28.069 | 19.736 | 20.948 | 6.193  |
| 16 | 0.2359 | 11.551 | 16.092 | 13.572 | 12.637 | 14.270 |
| 16 | 0.2369 | 8.589  | 14.216 | 9.809  | 17.578 | 5.316  |
| 16 | 0.2379 | 16.799 | 13.326 | 16.690 | 15.367 | 15.958 |
| 16 | 0.2389 | 21.460 | 28.423 | 23.769 | 12.971 | 10.479 |
| 16 | 0.2399 | 16.498 | 10.506 | 14.807 | 13.032 | 13.513 |
| 16 | 0.2409 | 8.361  | 11.018 | 12.079 | 5.967  | 8.382  |
| 16 | 0.2419 | 11.271 | 16.317 | 17.147 | 13.227 | 18.765 |
| 16 | 0.2429 | 20.131 | 19.763 | 17.173 | 14.724 | 10.311 |
| 16 | 0.2439 | 13.627 | 17.045 | 13.950 | 13.844 | 9.467  |
| 16 | 0.2449 | 10.651 | 16.469 | 12.095 | 12.867 | 7.803  |
| 16 | 0.2459 | 11.890 | 18.021 | 12.117 | 14.987 | 5.911  |

|    |        |        |        |        |        |        |
|----|--------|--------|--------|--------|--------|--------|
| 16 | 0.2469 | 19.427 | 23.498 | 23.705 | 11.704 | 8.701  |
| 16 | 0.2479 | 17.103 | 16.934 | 17.902 | 9.529  | 7.761  |
| 16 | 0.2489 | 9.841  | 9.102  | 12.522 | 8.400  | 5.421  |
| 16 | 0.2499 | 11.407 | 11.253 | 8.173  | 16.408 | 14.961 |
| 16 | 0.2509 | 16.594 | 16.723 | 16.582 | 24.492 | 5.940  |
| 16 | 0.2519 | 12.364 | 21.463 | 16.589 | 21.474 | 3.708  |
| 16 | 0.2529 | 2.036  | 13.570 | 7.832  | 12.236 | 9.317  |
| 16 | 0.2539 | 21.130 | 27.303 | 22.607 | 16.935 | 8.298  |
| 16 | 0.2549 | 20.863 | 30.408 | 22.256 | 24.619 | 6.905  |
| 16 | 0.2559 | 13.952 | 10.807 | 10.793 | 9.707  | 13.605 |
| 16 | 0.2569 | 12.255 | 19.169 | 11.992 | 18.110 | 21.392 |
| 16 | 0.2579 | 20.034 | 22.879 | 21.977 | 9.601  | 12.651 |
| 16 | 0.2589 | 12.999 | 18.776 | 14.255 | 17.010 | 15.224 |
| 16 | 0.2599 | 19.913 | 26.293 | 22.467 | 12.076 | 6.470  |
| 16 | 0.2609 | 13.227 | 17.683 | 11.340 | 9.869  | 13.047 |
| 16 | 0.2619 | 11.030 | 20.398 | 15.027 | 18.548 | 12.741 |
| 16 | 0.2629 | 12.309 | 24.916 | 16.005 | 14.790 | 18.022 |
| 16 | 0.2639 | 8.631  | 12.525 | 6.768  | 11.670 | 4.611  |
| 16 | 0.2649 | 6.445  | 14.462 | 10.655 | 17.173 | 7.371  |
| 16 | 0.2659 | 10.013 | 7.982  | 7.353  | 6.622  | 12.745 |
| 16 | 0.2669 | 10.880 | 18.955 | 9.639  | 13.639 | 9.250  |
| 16 | 0.2679 | 18.862 | 13.044 | 16.678 | 10.377 | 13.102 |
| 16 | 0.2689 | 6.523  | 6.007  | 9.645  | 7.033  | 7.656  |
| 16 | 0.2699 | 10.398 | 14.842 | 13.337 | 15.719 | 2.697  |
| 16 | 0.2709 | 13.020 | 13.183 | 12.038 | 9.780  | 10.187 |
| 16 | 0.2719 | 16.740 | 9.571  | 10.606 | 9.539  | 8.916  |
| 16 | 0.2729 | 19.008 | 22.932 | 14.916 | 13.910 | 5.036  |
| 16 | 0.2739 | 14.152 | 15.317 | 13.220 | 22.145 | 11.313 |
| 16 | 0.2749 | 15.956 | 15.763 | 19.565 | 8.990  | 1.766  |
| 16 | 0.2759 | 15.516 | 24.018 | 18.193 | 10.031 | 14.311 |
| 16 | 0.2769 | 14.105 | 10.491 | 16.923 | 9.753  | 9.294  |
| 16 | 0.2779 | 7.786  | 24.995 | 14.481 | 20.968 | 12.346 |
| 16 | 0.2789 | 13.124 | 26.507 | 18.418 | 19.776 | 7.615  |
| 16 | 0.2799 | 18.700 | 29.379 | 21.726 | 10.504 | 12.030 |
| 16 | 0.2809 | 28.055 | 25.186 | 19.537 | 7.422  | 12.800 |
| 16 | 0.2819 | 13.122 | 16.593 | 16.196 | 13.087 | 5.184  |
| 16 | 0.2829 | 13.062 | 9.925  | 11.275 | 12.488 | 12.519 |
| 16 | 0.2839 | 8.552  | 21.739 | 13.369 | 18.038 | 10.732 |
| 16 | 0.2849 | 18.806 | 28.970 | 19.708 | 24.657 | 14.421 |
| 16 | 0.2859 | 24.254 | 26.260 | 19.093 | 9.944  | 8.968  |
| 16 | 0.2869 | 12.495 | 21.738 | 15.398 | 12.093 | 8.691  |
| 16 | 0.2879 | 9.550  | 19.165 | 12.276 | 14.117 | 9.282  |
| 16 | 0.2889 | 8.740  | 19.147 | 10.230 | 20.212 | 15.505 |
| 16 | 0.2899 | 14.596 | 24.766 | 13.469 | 25.087 | 9.717  |
| 16 | 0.2909 | 18.325 | 21.929 | 19.785 | 14.573 | 3.437  |
| 16 | 0.2919 | 19.903 | 16.479 | 17.482 | 17.494 | 7.981  |
| 16 | 0.2929 | 31.575 | 24.535 | 27.160 | 22.639 | 10.184 |
| 16 | 0.2939 | 10.192 | 26.782 | 13.812 | 13.762 | 6.665  |
| 16 | 0.2949 | 13.110 | 14.808 | 12.548 | 4.320  | 12.813 |
| 16 | 0.2959 | 12.761 | 26.068 | 18.935 | 16.430 | 10.495 |

|    |        |        |        |        |        |        |
|----|--------|--------|--------|--------|--------|--------|
| 16 | 0.2969 | 25.289 | 36.595 | 32.470 | 9.423  | 13.989 |
| 16 | 0.2979 | 14.645 | 21.276 | 11.189 | 16.388 | 11.875 |
| 16 | 0.2989 | 15.535 | 25.374 | 11.519 | 14.460 | 9.201  |
| 16 | 0.2999 | 9.622  | 19.945 | 10.455 | 12.829 | 8.368  |
| 16 | 0.3009 | 11.466 | 23.089 | 12.885 | 9.179  | 8.770  |
| 16 | 0.3019 | 7.502  | 14.356 | 12.282 | 11.970 | 4.547  |
| 16 | 0.3029 | 12.752 | 21.078 | 15.271 | 10.608 | 6.553  |
| 16 | 0.3039 | 14.945 | 15.124 | 17.317 | 14.337 | 10.115 |
| 16 | 0.3049 | 11.170 | 14.574 | 12.711 | 12.312 | 8.704  |
| 16 | 0.3059 | 10.943 | 17.604 | 7.665  | 14.433 | 8.022  |
| 16 | 0.3069 | 12.090 | 13.815 | 7.598  | 9.252  | 6.986  |
| 16 | 0.3079 | 14.597 | 19.904 | 15.934 | 12.471 | 8.907  |
| 16 | 0.3089 | 14.513 | 19.854 | 13.962 | 11.164 | 8.792  |
| 16 | 0.3099 | 13.682 | 19.542 | 13.174 | 11.286 | 8.899  |
| 16 | 0.3109 | 11.120 | 17.420 | 11.561 | 7.059  | 7.068  |
| 16 | 0.3119 | 8.056  | 8.112  | 4.385  | 7.491  | 6.229  |
| 16 | 0.3129 | 10.251 | 11.192 | 6.219  | 13.690 | 11.202 |
| 16 | 0.3139 | 18.286 | 18.690 | 13.792 | 10.450 | 8.735  |
| 16 | 0.3149 | 14.373 | 15.382 | 13.856 | 12.606 | 10.518 |
| 16 | 0.3159 | 19.215 | 18.579 | 17.939 | 11.513 | 13.443 |
| 16 | 0.3169 | 10.601 | 15.071 | 10.173 | 12.022 | 6.017  |
| 16 | 0.3179 | 14.255 | 28.298 | 19.166 | 11.633 | 6.689  |
| 16 | 0.3189 | 13.160 | 20.524 | 13.670 | 16.577 | 10.242 |
| 16 | 0.3199 | 12.083 | 14.688 | 14.249 | 10.373 | 12.678 |
| 16 | 0.3209 | 14.916 | 16.756 | 17.516 | 10.114 | 12.929 |
| 16 | 0.3219 | 14.085 | 15.417 | 7.743  | 20.533 | 13.036 |
| 16 | 0.3229 | 19.070 | 22.945 | 14.263 | 17.534 | 9.318  |
| 16 | 0.3239 | 18.988 | 22.904 | 14.274 | 17.532 | 9.283  |
| 16 | 0.3249 | 16.130 | 12.265 | 8.981  | 17.045 | 9.052  |
| 16 | 0.3259 | 16.410 | 15.933 | 10.680 | 13.545 | 11.344 |
| 16 | 0.3269 | 14.506 | 16.995 | 10.672 | 13.874 | 14.804 |
| 16 | 0.3279 | 5.983  | 7.490  | 3.542  | 11.023 | 9.450  |
| 16 | 0.3289 | 3.853  | 8.378  | 7.645  | 16.665 | 14.483 |
| 16 | 0.3299 | 15.506 | 12.051 | 14.758 | 6.316  | 5.058  |
| 16 | 0.3309 | 22.117 | 28.314 | 23.133 | 6.290  | 6.746  |
| 16 | 0.3319 | 27.779 | 22.134 | 18.897 | 14.348 | 14.047 |
| 16 | 0.3329 | 17.188 | 14.085 | 16.235 | 23.289 | 11.565 |
| 16 | 0.3339 | 12.774 | 25.091 | 14.633 | 22.857 | 4.008  |
| 16 | 0.3349 | 19.773 | 26.120 | 20.976 | 13.825 | 14.479 |
| 16 | 0.3359 | 9.575  | 6.683  | 8.803  | 10.742 | 12.016 |
| 16 | 0.3369 | 16.796 | 24.323 | 20.803 | 7.290  | 16.092 |
| 16 | 0.3379 | 18.687 | 29.977 | 22.018 | 10.138 | 18.961 |
| 16 | 0.3389 | 23.183 | 25.403 | 24.937 | 16.440 | 17.859 |
| 16 | 0.3399 | 18.260 | 26.136 | 23.896 | 14.494 | 20.850 |
| 16 | 0.3409 | 18.673 | 22.619 | 20.378 | 12.624 | 13.199 |
| 16 | 0.3419 | 11.109 | 11.320 | 10.986 | 11.309 | 12.670 |
| 16 | 0.3429 | 14.466 | 15.457 | 18.909 | 15.428 | 12.694 |
| 16 | 0.3439 | 16.762 | 19.780 | 20.581 | 17.241 | 14.067 |
| 16 | 0.3449 | 15.795 | 18.426 | 19.822 | 11.961 | 12.346 |
| 16 | 0.3459 | 12.010 | 10.049 | 14.006 | 9.462  | 17.492 |

|    |        |        |        |        |        |        |
|----|--------|--------|--------|--------|--------|--------|
| 16 | 0.3469 | 11.010 | 15.667 | 17.336 | 7.840  | 11.916 |
| 16 | 0.3479 | 17.501 | 19.601 | 20.014 | 9.125  | 25.113 |
| 16 | 0.3489 | 10.325 | 12.411 | 11.279 | 13.792 | 13.495 |
| 16 | 0.3499 | 15.862 | 19.499 | 18.018 | 13.125 | 13.767 |
| 16 | 0.3509 | 12.677 | 12.628 | 15.018 | 5.070  | 16.699 |
| 16 | 0.3519 | 12.176 | 14.096 | 13.598 | 11.896 | 16.215 |
| 16 | 0.3529 | 16.832 | 15.677 | 19.008 | 5.445  | 12.632 |
| 16 | 0.3539 | 13.616 | 15.276 | 17.899 | 14.566 | 11.145 |
| 16 | 0.3549 | 16.566 | 17.101 | 24.694 | 7.459  | 15.710 |
| 16 | 0.3559 | 15.415 | 15.311 | 20.740 | 7.838  | 21.376 |
| 16 | 0.3569 | 14.351 | 10.464 | 13.893 | 17.582 | 8.325  |
| 16 | 0.3579 | 11.485 | 24.482 | 14.325 | 25.389 | 19.817 |
| 16 | 0.3589 | 15.969 | 20.991 | 15.240 | 16.148 | 12.936 |
| 16 | 0.3599 | 11.745 | 18.620 | 17.362 | 12.590 | 15.657 |
| 16 | 0.3609 | 9.840  | 10.332 | 13.038 | 9.441  | 5.846  |
| 16 | 0.3619 | 9.714  | 17.336 | 15.229 | 10.164 | 5.397  |
| 16 | 0.3629 | 13.606 | 18.984 | 21.724 | 7.971  | 8.329  |
| 16 | 0.3639 | 13.343 | 20.133 | 22.296 | 8.977  | 9.917  |
| 16 | 0.3649 | 7.272  | 21.872 | 15.673 | 14.135 | 7.888  |
| 16 | 0.3659 | 12.456 | 26.197 | 20.283 | 17.793 | 11.053 |
| 16 | 0.3669 | 14.509 | 25.953 | 22.240 | 16.235 | 8.226  |
| 16 | 0.3679 | 16.679 | 21.716 | 22.532 | 9.835  | 15.432 |
| 16 | 0.3689 | 17.734 | 24.511 | 27.533 | 10.908 | 12.879 |
| 16 | 0.3699 | 11.504 | 14.715 | 10.851 | 8.866  | 8.688  |
| 16 | 0.3709 | 4.688  | 16.396 | 11.977 | 7.515  | 8.419  |
| 16 | 0.3719 | 16.750 | 14.933 | 13.377 | 13.994 | 4.363  |
| 16 | 0.3729 | 20.098 | 21.498 | 25.980 | 11.988 | 13.719 |
| 16 | 0.3739 | 10.218 | 18.990 | 14.272 | 12.836 | 12.679 |
| 16 | 0.3749 | 7.835  | 15.410 | 13.930 | 23.897 | 11.182 |
| 16 | 0.3759 | 16.754 | 15.088 | 17.589 | 6.651  | 11.788 |
| 16 | 0.3769 | 11.850 | 7.639  | 10.294 | 11.234 | 17.134 |
| 16 | 0.3779 | 7.763  | 5.801  | 10.426 | 10.610 | 18.950 |
| 16 | 0.3789 | 7.260  | 10.284 | 10.126 | 12.800 | 15.400 |
| 16 | 0.3799 | 8.039  | 15.475 | 12.239 | 20.452 | 14.798 |
| 16 | 0.3809 | 8.562  | 15.964 | 13.241 | 9.585  | 10.932 |
| 16 | 0.3819 | 13.123 | 20.114 | 13.794 | 12.800 | 13.969 |
| 16 | 0.3829 | 11.263 | 21.111 | 14.734 | 14.725 | 14.328 |
| 16 | 0.3839 | 8.832  | 20.982 | 14.763 | 22.378 | 28.270 |
| 16 | 0.3849 | 15.157 | 20.666 | 14.523 | 37.529 | 16.051 |
| 16 | 0.3859 | 14.057 | 15.626 | 14.777 | 15.728 | 7.589  |
| 16 | 0.3869 | 14.897 | 11.983 | 17.845 | 7.972  | 13.229 |
| 16 | 0.3879 | 8.777  | 9.200  | 15.997 | 6.345  | 14.020 |
| 16 | 0.3889 | 14.918 | 17.515 | 18.111 | 20.945 | 11.549 |
| 16 | 0.3899 | 20.688 | 20.000 | 21.145 | 14.453 | 5.503  |
| 16 | 0.3909 | 10.676 | 22.299 | 23.392 | 11.856 | 19.062 |
| 16 | 0.3919 | 8.031  | 11.761 | 16.800 | 9.363  | 15.241 |
| 16 | 0.3929 | 15.888 | 17.904 | 27.044 | 6.860  | 23.673 |
| 16 | 0.3939 | 9.997  | 13.277 | 18.391 | 11.684 | 18.403 |
| 16 | 0.3949 | 7.034  | 15.433 | 15.170 | 15.621 | 12.222 |
| 16 | 0.3959 | 5.455  | 9.154  | 9.133  | 19.438 | 27.690 |

|    |        |        |        |        |        |        |
|----|--------|--------|--------|--------|--------|--------|
| 16 | 0.3969 | 5.990  | 14.075 | 13.218 | 13.785 | 17.098 |
| 16 | 0.3979 | 8.035  | 8.554  | 7.060  | 17.477 | 18.905 |
| 16 | 0.3989 | 4.970  | 15.388 | 7.612  | 9.221  | 3.320  |
| 16 | 0.3999 | 4.993  | 15.403 | 7.603  | 9.231  | 3.336  |
| 16 | 0.4009 | 4.204  | 15.825 | 5.979  | 13.126 | 2.172  |
| 16 | 0.4019 | 10.515 | 22.859 | 12.310 | 14.812 | 7.409  |
| 16 | 0.4029 | 11.778 | 22.274 | 14.452 | 12.539 | 8.979  |
| 16 | 0.4039 | 10.011 | 12.113 | 12.103 | 9.351  | 13.435 |
| 16 | 0.4049 | 10.210 | 12.392 | 12.132 | 9.149  | 13.408 |
| 16 | 0.4059 | 9.844  | 10.328 | 12.015 | 12.468 | 18.674 |
| 16 | 0.4069 | 5.765  | 2.693  | 5.222  | 3.007  | 17.515 |
| 16 | 0.4079 | 2.094  | 6.833  | 5.770  | 9.831  | 11.520 |
| 16 | 0.4089 | 18.392 | 8.880  | 19.425 | 22.525 | 14.502 |
| 16 | 0.4099 | 13.108 | 10.781 | 17.704 | 18.498 | 18.059 |
| 16 | 0.4109 | 6.157  | 10.593 | 12.579 | 7.956  | 22.406 |
| 16 | 0.4119 | 4.295  | 9.071  | 9.045  | 5.799  | 13.966 |
| 16 | 0.4129 | 6.635  | 9.971  | 11.193 | 12.664 | 17.039 |
| 16 | 0.4139 | 9.973  | 11.070 | 11.643 | 8.785  | 15.677 |
| 16 | 0.4149 | 10.622 | 14.875 | 16.584 | 10.092 | 11.736 |
| 16 | 0.4159 | 7.832  | 10.387 | 12.173 | 9.612  | 8.493  |
| 16 | 0.4169 | 10.523 | 15.762 | 14.678 | 13.783 | 5.551  |
| 16 | 0.4179 | 8.931  | 14.765 | 11.670 | 10.276 | 16.386 |
| 16 | 0.4189 | 6.185  | 8.645  | 7.420  | 7.669  | 18.703 |
| 16 | 0.4199 | 7.961  | 8.816  | 9.667  | 4.746  | 7.678  |
| 16 | 0.4209 | 9.117  | 13.088 | 18.236 | 14.976 | 11.203 |
| 16 | 0.4219 | 6.448  | 9.247  | 12.445 | 11.922 | 5.777  |
| 16 | 0.4229 | 0.857  | 3.629  | 5.047  | 5.467  | 2.593  |
| 16 | 0.4239 | 0.141  | 3.604  | 2.697  | 3.865  | 3.291  |
| 16 | 0.4249 | 9.175  | 14.177 | 12.706 | 8.626  | 7.274  |
| 16 | 0.4259 | 4.234  | 6.444  | 4.177  | 14.312 | 13.069 |
| 16 | 0.4269 | 5.246  | 13.884 | 11.261 | 13.584 | 21.510 |
| 16 | 0.4279 | 21.281 | 18.545 | 25.090 | 14.843 | 11.952 |
| 16 | 0.4289 | 7.224  | 18.860 | 16.360 | 10.479 | 5.811  |
| 16 | 0.4299 | 16.138 | 8.347  | 12.981 | 11.852 | 9.459  |
| 16 | 0.4309 | 17.741 | 8.198  | 16.452 | 13.156 | 20.240 |
| 16 | 0.4319 | 19.679 | 9.033  | 15.536 | 12.473 | 13.517 |
| 16 | 0.4329 | 20.433 | 10.621 | 16.330 | 21.926 | 15.847 |
| 16 | 0.4339 | 10.719 | 12.284 | 10.115 | 16.881 | 14.780 |
| 16 | 0.4349 | 3.780  | 10.599 | 7.621  | 17.228 | 12.918 |
| 16 | 0.4359 | 5.227  | 8.928  | 10.915 | 9.371  | 10.547 |
| 16 | 0.4369 | 20.748 | 21.202 | 23.577 | 16.927 | 19.697 |
| 16 | 0.4379 | 7.719  | 8.056  | 9.165  | 22.130 | 28.600 |
| 16 | 0.4389 | 8.591  | 7.573  | 12.598 | 16.269 | 13.757 |
| 16 | 0.4399 | 8.813  | 9.655  | 14.612 | 13.479 | 12.589 |
| 16 | 0.4409 | 4.939  | 7.682  | 6.577  | 6.907  | 7.367  |
| 16 | 0.4419 | 7.192  | 10.040 | 9.270  | 6.380  | 12.364 |
| 16 | 0.4429 | 7.140  | 9.925  | 8.525  | 5.618  | 4.739  |
| 16 | 0.4439 | 8.525  | 9.965  | 7.912  | 10.185 | 7.057  |
| 16 | 0.4449 | 8.904  | 10.231 | 8.118  | 10.087 | 7.251  |
| 16 | 0.4459 | 3.452  | 6.193  | 3.236  | 5.981  | 5.939  |

|    |        |        |        |        |        |        |
|----|--------|--------|--------|--------|--------|--------|
| 16 | 0.4469 | 1.735  | 2.900  | 0.314  | 2.698  | 8.428  |
| 16 | 0.4479 | 6.080  | 6.860  | 5.473  | 6.237  | 11.481 |
| 16 | 0.4489 | 6.255  | 10.946 | 4.569  | 14.068 | 19.478 |
| 16 | 0.4499 | 8.279  | 10.110 | 11.992 | 16.064 | 23.932 |
| 16 | 0.4509 | 3.534  | 6.612  | 6.886  | 10.648 | 20.955 |
| 16 | 0.4519 | 10.836 | 15.587 | 13.588 | 20.336 | 14.433 |
| 16 | 0.4529 | 7.203  | 14.168 | 11.765 | 10.733 | 14.122 |
| 16 | 0.4539 | 8.505  | 16.080 | 11.348 | 7.806  | 8.754  |
| 16 | 0.4549 | 7.041  | 14.420 | 10.888 | 8.948  | 7.589  |
| 16 | 0.4559 | 10.991 | 13.027 | 10.579 | 16.691 | 12.716 |
| 16 | 0.4569 | 13.278 | 10.741 | 13.729 | 11.162 | 18.249 |
| 16 | 0.4579 | 7.213  | 9.509  | 8.679  | 8.378  | 22.121 |
| 16 | 0.4589 | 12.589 | 22.290 | 16.829 | 10.590 | 9.954  |
| 16 | 0.4599 | 10.818 | 16.287 | 15.194 | 14.544 | 12.535 |
| 16 | 0.4609 | 14.182 | 19.650 | 19.836 | 17.600 | 14.137 |
| 16 | 0.4619 | 8.124  | 12.640 | 9.876  | 12.351 | 11.104 |
| 16 | 0.4629 | 10.785 | 16.709 | 13.272 | 16.750 | 19.572 |
| 16 | 0.4639 | 10.667 | 17.073 | 12.971 | 13.452 | 19.306 |
| 16 | 0.4649 | 20.411 | 22.616 | 20.823 | 21.093 | 20.596 |
| 16 | 0.4659 | 8.956  | 17.981 | 10.392 | 12.187 | 6.628  |
| 16 | 0.4669 | 12.169 | 17.972 | 10.037 | 12.236 | 12.411 |
| 16 | 0.4679 | 7.053  | 15.552 | 8.909  | 19.553 | 6.644  |
| 16 | 0.4689 | 11.417 | 12.543 | 10.102 | 18.352 | 3.317  |
| 16 | 0.4699 | 11.318 | 12.149 | 9.905  | 18.124 | 3.321  |
| 16 | 0.4709 | 6.432  | 10.767 | 7.322  | 8.691  | 3.141  |
| 16 | 0.4719 | 6.379  | 10.531 | 5.812  | 9.969  | 6.483  |
| 16 | 0.4729 | 16.510 | 14.429 | 14.157 | 24.016 | 17.520 |
| 16 | 0.4739 | 18.642 | 14.561 | 15.004 | 11.687 | 16.361 |
| 16 | 0.4749 | 9.614  | 14.602 | 8.038  | 10.143 | 14.332 |
| 16 | 0.4759 | 9.552  | 14.012 | 7.574  | 10.002 | 14.160 |
| 16 | 0.4769 | 10.149 | 19.576 | 11.411 | 20.090 | 12.270 |
| 16 | 0.4779 | 11.557 | 11.822 | 8.292  | 17.218 | 20.895 |
| 16 | 0.4789 | 5.975  | 11.353 | 4.871  | 8.272  | 9.157  |
| 16 | 0.4799 | 5.747  | 7.476  | 4.063  | 10.156 | 14.125 |
| 16 | 0.4809 | 5.408  | 4.376  | 2.107  | 2.861  | 9.427  |
| 16 | 0.4819 | 12.953 | 8.653  | 14.903 | 12.603 | 6.622  |
| 16 | 0.4829 | 4.754  | 9.726  | 6.424  | 15.035 | 7.513  |
| 16 | 0.4839 | 4.782  | 9.707  | 4.611  | 13.394 | 11.247 |
| 16 | 0.4849 | 3.321  | 9.635  | 4.150  | 12.864 | 5.728  |
| 16 | 0.4859 | 5.300  | 11.167 | 5.995  | 18.925 | 5.132  |
| 16 | 0.4869 | 7.268  | 12.009 | 7.551  | 22.133 | 11.397 |
| 16 | 0.4879 | 11.310 | 14.010 | 12.118 | 24.137 | 20.291 |
| 16 | 0.4889 | 6.609  | 7.873  | 4.470  | 18.405 | 18.332 |
| 16 | 0.4899 | 10.920 | 9.146  | 8.692  | 24.326 | 13.041 |
| 16 | 0.4909 | 6.021  | 6.819  | 5.803  | 16.648 | 9.291  |
| 16 | 0.4919 | 6.185  | 6.802  | 5.973  | 16.694 | 9.057  |
| 16 | 0.4929 | 4.101  | 10.836 | 6.468  | 11.941 | 2.103  |
| 16 | 0.4939 | 9.985  | 9.834  | 10.834 | 18.915 | 2.676  |
| 16 | 0.4949 | 10.514 | 14.049 | 8.157  | 16.832 | 3.227  |
| 16 | 0.4959 | 10.636 | 14.046 | 8.190  | 16.798 | 3.133  |

|    |        |        |        |        |        |        |
|----|--------|--------|--------|--------|--------|--------|
| 16 | 0.4969 | 8.292  | 10.693 | 7.000  | 12.983 | 8.653  |
| 16 | 0.4979 | 6.213  | 8.306  | 8.742  | 10.763 | 3.994  |
| 16 | 0.4989 | 5.966  | 6.485  | 3.040  | 15.191 | 12.095 |
| 16 | 0.4999 | 18.208 | 14.465 | 14.383 | 19.987 | 16.293 |
| 16 | 0.5009 | 12.573 | 10.689 | 12.548 | 21.156 | 8.490  |
| 16 | 0.5019 | 15.141 | 19.235 | 10.946 | 26.489 | 19.072 |
| 16 | 0.5029 | 17.705 | 18.933 | 9.806  | 28.069 | 19.396 |
| 16 | 0.5039 | 6.404  | 14.695 | 12.730 | 22.261 | 13.234 |
| 16 | 0.5049 | 9.421  | 9.801  | 11.353 | 18.100 | 11.294 |
| 16 | 0.5059 | 9.967  | 15.400 | 12.258 | 18.976 | 10.998 |
| 16 | 0.5069 | 7.431  | 10.628 | 8.102  | 18.372 | 10.526 |
| 16 | 0.5079 | 7.971  | 6.418  | 7.634  | 4.888  | 9.965  |
| 16 | 0.5089 | 4.712  | 5.953  | 6.261  | 17.859 | 9.181  |
| 16 | 0.5099 | 11.448 | 13.449 | 9.109  | 16.887 | 16.580 |
| 16 | 0.5109 | 16.610 | 14.823 | 9.624  | 25.770 | 20.374 |
| 16 | 0.5119 | 8.767  | 5.954  | 8.105  | 17.241 | 21.724 |
| 16 | 0.5129 | 12.364 | 13.577 | 9.476  | 15.482 | 7.597  |
| 16 | 0.5139 | 10.687 | 4.368  | 8.154  | 7.515  | 10.505 |
| 16 | 0.5149 | 8.266  | 6.992  | 6.550  | 15.819 | 16.866 |
| 16 | 0.5159 | 17.351 | 16.046 | 9.840  | 25.366 | 23.760 |
| 16 | 0.5169 | 21.458 | 16.360 | 15.886 | 23.965 | 14.539 |
| 16 | 0.5179 | 10.149 | 6.981  | 4.516  | 13.504 | 5.340  |
| 16 | 0.5189 | 9.557  | 11.278 | 7.472  | 12.558 | 7.890  |
| 16 | 0.5199 | 18.325 | 19.255 | 17.255 | 16.567 | 12.325 |
| 16 | 0.5209 | 13.780 | 14.014 | 10.361 | 22.716 | 13.613 |
| 16 | 0.5219 | 5.126  | 9.972  | 5.673  | 21.096 | 11.977 |
| 16 | 0.5229 | 15.872 | 13.765 | 15.906 | 15.569 | 10.677 |
| 16 | 0.5239 | 8.616  | 6.923  | 8.663  | 7.111  | 8.509  |
| 16 | 0.5249 | 10.413 | 6.290  | 9.374  | 15.431 | 12.569 |
| 16 | 0.5259 | 10.814 | 9.989  | 10.427 | 11.222 | 10.772 |
| 16 | 0.5269 | 9.543  | 7.948  | 12.395 | 14.395 | 7.307  |
| 16 | 0.5279 | 26.351 | 14.163 | 17.575 | 23.989 | 8.894  |
| 16 | 0.5289 | 8.067  | 7.438  | 8.364  | 16.718 | 12.953 |
| 16 | 0.5299 | 5.811  | 6.156  | 6.172  | 12.668 | 10.513 |
| 16 | 0.5309 | 7.691  | 9.376  | 11.900 | 19.194 | 9.206  |
| 16 | 0.5319 | 4.984  | 5.783  | 5.157  | 12.553 | 2.229  |
| 16 | 0.5329 | 13.444 | 10.781 | 7.603  | 7.762  | 3.521  |
| 16 | 0.5339 | 10.743 | 6.314  | 8.220  | 7.935  | 6.243  |
| 16 | 0.5349 | 5.326  | 5.188  | 2.280  | 10.020 | 6.228  |
| 16 | 0.5359 | 15.194 | 14.426 | 14.010 | 15.837 | 23.621 |
| 16 | 0.5369 | 17.879 | 15.495 | 11.284 | 11.647 | 7.654  |
| 16 | 0.5379 | 22.599 | 21.531 | 14.807 | 16.499 | 9.972  |
| 16 | 0.5389 | 19.166 | 16.674 | 9.774  | 18.576 | 7.628  |
| 16 | 0.5399 | 7.638  | 12.553 | 6.950  | 21.059 | 12.631 |
| 16 | 0.5409 | 20.318 | 19.943 | 9.703  | 10.138 | 11.450 |
| 16 | 0.5419 | 12.717 | 10.581 | 10.734 | 31.206 | 18.806 |
| 16 | 0.5429 | 17.166 | 11.245 | 11.416 | 27.940 | 21.650 |
| 16 | 0.5439 | 13.054 | 8.727  | 8.426  | 18.310 | 23.715 |
| 16 | 0.5449 | 23.064 | 15.449 | 20.047 | 7.129  | 12.024 |
| 16 | 0.5459 | 17.161 | 17.256 | 14.598 | 16.702 | 8.127  |



|    |        |        |        |        |        |        |
|----|--------|--------|--------|--------|--------|--------|
| 16 | 0.5469 | 27.323 | 20.047 | 28.349 | 13.016 | 11.908 |
| 16 | 0.5479 | 14.448 | 14.547 | 12.258 | 15.454 | 26.210 |
| 16 | 0.5489 | 10.257 | 15.347 | 8.419  | 13.668 | 21.896 |
| 16 | 0.5499 | 14.287 | 13.879 | 15.352 | 15.842 | 16.231 |
| 16 | 0.5509 | 9.139  | 9.083  | 6.615  | 3.248  | 8.292  |
| 16 | 0.5519 | 8.689  | 7.754  | 7.767  | 6.029  | 8.181  |
| 16 | 0.5529 | 8.063  | 7.896  | 10.786 | 12.298 | 6.384  |
| 16 | 0.5539 | 13.001 | 14.063 | 11.865 | 12.571 | 3.286  |
| 16 | 0.5549 | 15.216 | 5.868  | 10.299 | 13.850 | 7.635  |
| 16 | 0.5559 | 14.127 | 15.318 | 8.635  | 9.482  | 13.896 |
| 16 | 0.5569 | 16.239 | 14.029 | 14.931 | 10.485 | 7.625  |
| 16 | 0.5579 | 25.934 | 21.755 | 25.664 | 9.162  | 9.087  |
| 16 | 0.5589 | 21.530 | 19.790 | 17.414 | 19.638 | 21.212 |
| 16 | 0.5599 | 10.193 | 11.784 | 8.120  | 11.982 | 10.863 |
| 16 | 0.5609 | 13.346 | 14.406 | 12.122 | 13.687 | 3.929  |
| 16 | 0.5619 | 12.594 | 15.104 | 11.383 | 15.080 | 12.443 |
| 16 | 0.5629 | 14.079 | 9.706  | 9.281  | 14.675 | 9.791  |
| 16 | 0.5639 | 14.503 | 12.784 | 14.745 | 16.108 | 14.357 |
| 16 | 0.5649 | 8.240  | 12.089 | 9.640  | 16.129 | 24.650 |
| 16 | 0.5659 | 7.980  | 11.625 | 9.243  | 15.643 | 24.631 |
| 16 | 0.5669 | 19.397 | 15.509 | 17.466 | 20.216 | 15.037 |
| 16 | 0.5679 | 10.364 | 12.086 | 8.505  | 10.220 | 11.572 |
| 16 | 0.5689 | 13.804 | 11.793 | 7.682  | 15.288 | 21.436 |
| 16 | 0.5699 | 15.632 | 7.256  | 14.253 | 12.406 | 20.137 |
| 16 | 0.5709 | 16.441 | 14.564 | 15.542 | 16.277 | 13.183 |
| 16 | 0.5719 | 21.682 | 12.701 | 13.004 | 12.492 | 9.969  |
| 16 | 0.5729 | 18.163 | 14.795 | 13.193 | 10.079 | 10.777 |
| 16 | 0.5739 | 16.920 | 10.976 | 10.660 | 14.951 | 15.038 |
| 16 | 0.5749 | 21.617 | 12.245 | 15.753 | 11.922 | 14.985 |
| 16 | 0.5759 | 11.586 | 5.460  | 7.025  | 6.911  | 6.684  |
| 16 | 0.5769 | 11.034 | 8.914  | 11.789 | 3.652  | 6.377  |
| 16 | 0.5779 | 10.477 | 8.200  | 7.033  | 5.868  | 4.493  |
| 16 | 0.5789 | 13.016 | 5.177  | 7.711  | 5.387  | 12.927 |
| 16 | 0.5799 | 17.986 | 14.059 | 15.677 | 17.874 | 15.189 |
| 16 | 0.5809 | 17.988 | 14.091 | 15.691 | 17.828 | 15.114 |
| 16 | 0.5819 | 16.981 | 12.268 | 13.088 | 11.566 | 12.342 |
| 16 | 0.5829 | 20.608 | 11.307 | 11.415 | 11.743 | 10.451 |
| 16 | 0.5839 | 19.688 | 12.680 | 11.110 | 12.954 | 11.564 |
| 16 | 0.5849 | 12.094 | 8.205  | 7.368  | 3.010  | 5.615  |
| 16 | 0.5859 | 19.176 | 16.812 | 12.311 | 17.350 | 8.984  |
| 16 | 0.5869 | 8.242  | 19.623 | 7.465  | 22.149 | 12.679 |
| 16 | 0.5879 | 5.956  | 14.202 | 6.060  | 9.964  | 5.768  |
| 16 | 0.5889 | 5.100  | 5.071  | 4.141  | 11.010 | 8.695  |
| 16 | 0.5899 | 3.278  | 4.889  | 7.077  | 7.254  | 10.081 |
| 16 | 0.5909 | 9.378  | 8.204  | 12.102 | 4.420  | 5.403  |
| 16 | 0.5919 | 12.497 | 11.402 | 12.716 | 5.084  | 5.384  |
| 16 | 0.5929 | 23.961 | 18.143 | 19.082 | 10.720 | 10.100 |
| 16 | 0.5939 | 22.395 | 15.217 | 16.367 | 13.226 | 16.377 |
| 16 | 0.5949 | 8.414  | 6.011  | 4.449  | 11.008 | 11.337 |
| 16 | 0.5959 | 8.740  | 7.902  | 6.052  | 9.156  | 5.909  |

|    |        |        |        |        |        |        |
|----|--------|--------|--------|--------|--------|--------|
| 16 | 0.5969 | 13.366 | 13.177 | 13.573 | 6.920  | 3.533  |
| 16 | 0.5979 | 10.570 | 10.032 | 8.500  | 10.394 | 4.298  |
| 16 | 0.5989 | 7.967  | 5.851  | 5.719  | 3.807  | 11.336 |
| 16 | 0.5999 | 12.165 | 9.099  | 7.345  | 7.126  | 5.719  |
| 16 | 0.6009 | 13.111 | 13.174 | 10.263 | 11.768 | 10.792 |
| 16 | 0.6019 | 8.656  | 8.905  | 10.779 | 14.928 | 15.297 |
| 16 | 0.6029 | 6.579  | 6.276  | 6.446  | 14.265 | 20.079 |
| 16 | 0.6039 | 5.015  | 2.958  | 3.277  | 9.216  | 6.373  |
| 16 | 0.6049 | 14.405 | 11.038 | 7.646  | 15.543 | 11.868 |
| 16 | 0.6059 | 21.267 | 23.881 | 19.826 | 13.919 | 9.974  |
| 16 | 0.6069 | 12.040 | 9.596  | 11.128 | 14.709 | 8.228  |
| 16 | 0.6079 | 13.280 | 15.726 | 13.771 | 18.547 | 16.232 |
| 16 | 0.6089 | 12.005 | 6.907  | 6.800  | 10.259 | 9.061  |
| 16 | 0.6099 | 13.748 | 5.567  | 14.199 | 10.741 | 8.900  |
| 16 | 0.6109 | 15.897 | 6.623  | 11.805 | 10.173 | 5.805  |
| 16 | 0.6119 | 13.010 | 8.653  | 10.050 | 13.446 | 5.981  |
| 16 | 0.6129 | 17.294 | 17.439 | 15.680 | 17.566 | 12.327 |
| 16 | 0.6139 | 12.199 | 6.370  | 8.773  | 16.303 | 13.668 |
| 16 | 0.6149 | 19.381 | 15.989 | 11.670 | 18.201 | 23.338 |
| 16 | 0.6159 | 26.623 | 14.783 | 14.002 | 18.975 | 18.735 |
| 16 | 0.6169 | 25.650 | 11.848 | 17.316 | 15.693 | 7.210  |
| 16 | 0.6179 | 20.504 | 7.388  | 20.009 | 10.769 | 12.735 |
| 16 | 0.6189 | 19.557 | 12.383 | 19.998 | 3.467  | 8.961  |
| 16 | 0.6199 | 21.396 | 16.892 | 16.909 | 10.052 | 10.039 |
| 16 | 0.6209 | 7.640  | 5.837  | 10.184 | 3.225  | 8.047  |
| 16 | 0.6219 | 9.970  | 5.239  | 8.151  | 8.071  | 10.387 |
| 16 | 0.6229 | 12.713 | 8.936  | 10.282 | 11.051 | 11.533 |
| 16 | 0.6239 | 19.150 | 10.346 | 12.764 | 15.693 | 10.148 |
| 16 | 0.6249 | 16.655 | 11.655 | 15.458 | 12.329 | 15.895 |
| 16 | 0.6259 | 14.171 | 10.246 | 15.941 | 13.125 | 26.191 |
| 16 | 0.6269 | 13.473 | 18.871 | 18.741 | 13.631 | 15.998 |
| 16 | 0.6279 | 18.534 | 15.619 | 20.514 | 12.289 | 10.541 |
| 16 | 0.6289 | 13.390 | 12.882 | 14.004 | 6.414  | 14.546 |
| 16 | 0.6299 | 12.749 | 6.131  | 10.446 | 11.302 | 19.078 |
| 16 | 0.6309 | 23.635 | 20.858 | 27.619 | 8.953  | 14.010 |
| 16 | 0.6319 | 14.728 | 13.627 | 18.290 | 11.413 | 13.462 |
| 16 | 0.6329 | 18.174 | 14.139 | 17.019 | 10.713 | 7.385  |
| 16 | 0.6339 | 7.158  | 7.142  | 6.673  | 5.527  | 15.417 |
| 16 | 0.6349 | 10.046 | 8.647  | 10.980 | 12.329 | 18.469 |
| 16 | 0.6359 | 20.926 | 9.781  | 17.929 | 7.102  | 10.861 |
| 16 | 0.6369 | 17.693 | 13.303 | 15.585 | 12.433 | 6.740  |
| 16 | 0.6379 | 14.029 | 12.666 | 11.040 | 5.073  | 2.291  |
| 16 | 0.6389 | 13.313 | 8.372  | 9.200  | 6.306  | 9.347  |
| 16 | 0.6399 | 8.571  | 2.979  | 5.351  | 3.069  | 11.951 |
| 16 | 0.6409 | 9.334  | 7.298  | 5.972  | 5.218  | 9.309  |
| 16 | 0.6419 | 13.099 | 7.304  | 8.755  | 11.263 | 17.339 |
| 16 | 0.6429 | 18.006 | 13.392 | 19.682 | 18.082 | 16.645 |
| 16 | 0.6439 | 15.897 | 13.310 | 15.006 | 20.542 | 26.470 |
| 16 | 0.6449 | 29.203 | 15.008 | 19.767 | 16.914 | 19.309 |
| 16 | 0.6459 | 18.909 | 13.822 | 13.191 | 11.213 | 8.735  |

|    |        |        |        |        |        |        |
|----|--------|--------|--------|--------|--------|--------|
| 16 | 0.6469 | 26.206 | 16.479 | 16.558 | 6.681  | 13.409 |
| 16 | 0.6479 | 16.589 | 8.917  | 12.511 | 13.089 | 15.779 |
| 16 | 0.6489 | 23.512 | 15.421 | 23.890 | 20.443 | 26.849 |
| 16 | 0.6499 | 27.837 | 20.393 | 28.715 | 21.289 | 19.215 |
| 16 | 0.6509 | 16.313 | 9.901  | 15.765 | 18.272 | 32.782 |
| 16 | 0.6519 | 20.687 | 14.250 | 16.756 | 13.469 | 22.310 |
| 16 | 0.6529 | 30.706 | 20.456 | 31.609 | 19.411 | 23.181 |
| 16 | 0.6539 | 35.943 | 26.638 | 32.246 | 12.601 | 20.808 |
| 16 | 0.6549 | 17.095 | 14.102 | 24.970 | 15.721 | 13.626 |
| 16 | 0.6559 | 25.117 | 21.132 | 32.522 | 19.505 | 18.044 |
| 16 | 0.6569 | 15.133 | 9.672  | 13.559 | 10.112 | 6.949  |
| 16 | 0.6579 | 23.106 | 20.095 | 22.614 | 27.938 | 35.589 |
| 16 | 0.6589 | 15.406 | 19.751 | 19.234 | 12.859 | 13.592 |
| 16 | 0.6599 | 20.650 | 17.190 | 23.860 | 20.386 | 27.283 |
| 16 | 0.6609 | 13.367 | 10.368 | 12.178 | 18.509 | 9.189  |
| 16 | 0.6619 | 12.677 | 11.721 | 11.821 | 11.703 | 14.724 |
| 16 | 0.6629 | 12.712 | 13.877 | 12.267 | 17.216 | 15.457 |
| 16 | 0.6639 | 8.157  | 9.304  | 9.493  | 8.373  | 10.823 |
| 16 | 0.6649 | 16.028 | 8.841  | 11.636 | 15.210 | 16.666 |
| 16 | 0.6659 | 18.246 | 10.330 | 14.856 | 8.827  | 8.694  |
| 16 | 0.6669 | 14.029 | 14.718 | 14.743 | 12.357 | 24.717 |
| 16 | 0.6679 | 10.835 | 9.859  | 15.207 | 13.952 | 12.237 |
| 16 | 0.6689 | 6.335  | 3.733  | 9.469  | 5.190  | 8.176  |
| 16 | 0.6699 | 10.610 | 7.480  | 9.617  | 3.461  | 17.196 |
| 16 | 0.6709 | 17.819 | 15.796 | 18.206 | 6.391  | 22.116 |
| 16 | 0.6719 | 16.182 | 10.325 | 11.218 | 10.781 | 17.438 |
| 16 | 0.6729 | 13.150 | 8.442  | 12.166 | 10.699 | 10.559 |
| 16 | 0.6739 | 26.459 | 19.320 | 27.810 | 9.486  | 11.371 |
| 16 | 0.6749 | 34.643 | 25.172 | 41.061 | 3.769  | 23.284 |
| 16 | 0.6759 | 16.481 | 17.562 | 16.975 | 13.901 | 9.964  |
| 16 | 0.6769 | 11.227 | 11.969 | 9.601  | 5.927  | 11.653 |
| 16 | 0.6779 | 8.904  | 6.440  | 14.500 | 10.781 | 9.583  |
| 16 | 0.6789 | 14.475 | 11.191 | 15.607 | 6.810  | 12.490 |
| 16 | 0.6799 | 13.459 | 13.805 | 16.372 | 10.515 | 13.215 |
| 16 | 0.6809 | 17.868 | 16.824 | 16.603 | 13.188 | 10.182 |
| 16 | 0.6819 | 20.961 | 20.066 | 16.436 | 8.052  | 13.993 |
| 16 | 0.6829 | 22.951 | 20.411 | 16.352 | 6.209  | 10.842 |
| 16 | 0.6839 | 29.075 | 27.663 | 22.817 | 5.342  | 14.099 |
| 16 | 0.6849 | 18.864 | 17.985 | 12.882 | 9.863  | 12.097 |
| 16 | 0.6859 | 37.009 | 29.522 | 22.966 | 14.212 | 18.515 |
| 16 | 0.6869 | 23.911 | 15.431 | 22.109 | 8.842  | 7.222  |
| 16 | 0.6879 | 19.690 | 15.335 | 16.054 | 9.234  | 9.382  |
| 16 | 0.6889 | 20.638 | 15.936 | 17.060 | 9.170  | 9.379  |
| 16 | 0.6899 | 24.817 | 19.741 | 27.540 | 11.309 | 13.433 |
| 16 | 0.6909 | 11.520 | 10.356 | 9.923  | 13.949 | 12.331 |
| 16 | 0.6919 | 8.242  | 14.634 | 14.861 | 12.536 | 24.036 |
| 16 | 0.6929 | 16.260 | 11.320 | 21.745 | 10.538 | 10.388 |
| 16 | 0.6939 | 19.014 | 15.096 | 20.462 | 10.467 | 12.314 |
| 16 | 0.6949 | 10.116 | 7.536  | 11.846 | 10.627 | 4.296  |
| 16 | 0.6959 | 9.912  | 7.170  | 11.665 | 10.102 | 11.689 |

|    |        |        |        |        |        |        |
|----|--------|--------|--------|--------|--------|--------|
| 16 | 0.6969 | 10.863 | 6.680  | 12.648 | 6.934  | 17.913 |
| 16 | 0.6979 | 15.046 | 12.613 | 18.358 | 10.681 | 13.255 |
| 16 | 0.6989 | 16.318 | 17.054 | 22.839 | 15.399 | 13.836 |
| 16 | 0.6999 | 15.965 | 14.592 | 17.895 | 14.447 | 7.897  |
| 16 | 0.7009 | 11.401 | 10.032 | 11.305 | 11.236 | 19.065 |
| 16 | 0.7019 | 7.179  | 5.271  | 9.808  | 9.863  | 8.962  |
| 16 | 0.7029 | 13.378 | 9.441  | 14.782 | 11.526 | 10.958 |
| 16 | 0.7039 | 20.841 | 16.594 | 21.181 | 9.301  | 9.484  |
| 16 | 0.7049 | 16.696 | 11.938 | 16.382 | 11.271 | 7.775  |
| 16 | 0.7059 | 18.589 | 10.632 | 10.836 | 15.559 | 7.576  |
| 16 | 0.7069 | 16.211 | 17.484 | 14.617 | 16.011 | 10.868 |
| 16 | 0.7079 | 9.384  | 11.356 | 10.502 | 15.381 | 8.671  |
| 16 | 0.7089 | 14.694 | 18.585 | 21.749 | 6.844  | 9.872  |
| 16 | 0.7099 | 18.250 | 15.286 | 11.557 | 10.182 | 11.381 |
| 16 | 0.7109 | 6.176  | 9.558  | 3.908  | 16.299 | 9.568  |
| 16 | 0.7119 | 24.607 | 17.747 | 18.425 | 10.610 | 12.324 |
| 16 | 0.7129 | 22.384 | 16.131 | 17.425 | 10.498 | 13.589 |
| 16 | 0.7139 | 13.509 | 14.913 | 19.215 | 22.778 | 18.377 |
| 16 | 0.7149 | 20.453 | 22.674 | 17.553 | 27.175 | 34.218 |
| 16 | 0.7159 | 9.298  | 15.306 | 13.237 | 15.520 | 11.769 |
| 16 | 0.7169 | 10.758 | 12.587 | 7.245  | 8.602  | 9.723  |
| 16 | 0.7179 | 9.754  | 11.160 | 4.065  | 12.114 | 7.907  |
| 16 | 0.7189 | 15.517 | 10.889 | 8.279  | 4.896  | 11.870 |
| 16 | 0.7199 | 10.024 | 11.498 | 8.632  | 7.318  | 7.709  |
| 16 | 0.7209 | 9.715  | 12.481 | 8.066  | 12.001 | 17.823 |
| 16 | 0.7219 | 2.513  | 8.272  | 7.947  | 15.310 | 10.281 |
| 16 | 0.7229 | 9.833  | 7.631  | 11.797 | 10.538 | 7.208  |
| 16 | 0.7239 | 15.870 | 13.216 | 11.968 | 11.424 | 21.304 |
| 16 | 0.7249 | 12.791 | 8.552  | 11.411 | 14.234 | 5.986  |
| 16 | 0.7259 | 19.516 | 15.060 | 11.855 | 16.280 | 18.345 |
| 16 | 0.7269 | 19.480 | 15.062 | 11.821 | 16.396 | 18.351 |
| 16 | 0.7279 | 16.382 | 12.481 | 11.066 | 13.556 | 20.603 |
| 16 | 0.7289 | 20.589 | 22.435 | 23.530 | 13.070 | 8.066  |
| 16 | 0.7299 | 10.153 | 14.734 | 17.182 | 13.130 | 7.719  |
| 16 | 0.7309 | 15.315 | 18.582 | 13.866 | 16.055 | 16.984 |
| 16 | 0.7319 | 12.595 | 9.992  | 11.601 | 15.886 | 18.699 |
| 16 | 0.7329 | 15.439 | 15.565 | 19.939 | 13.757 | 14.018 |
| 16 | 0.7339 | 18.177 | 17.127 | 15.148 | 14.120 | 23.341 |
| 16 | 0.7349 | 19.683 | 20.259 | 25.646 | 7.418  | 10.400 |
| 16 | 0.7359 | 12.709 | 11.625 | 17.235 | 7.915  | 19.629 |
| 16 | 0.7369 | 4.530  | 8.928  | 10.692 | 6.953  | 6.934  |
| 16 | 0.7379 | 13.914 | 10.340 | 10.189 | 8.144  | 15.134 |
| 16 | 0.7389 | 14.818 | 6.602  | 7.091  | 4.384  | 9.536  |
| 16 | 0.7399 | 9.852  | 9.108  | 4.524  | 9.287  | 18.407 |
| 16 | 0.7409 | 24.205 | 16.714 | 13.488 | 7.235  | 18.063 |
| 16 | 0.7419 | 24.887 | 20.405 | 18.099 | 7.068  | 9.167  |
| 16 | 0.7429 | 8.401  | 10.113 | 16.992 | 9.409  | 18.897 |
| 16 | 0.7439 | 11.247 | 8.288  | 14.296 | 6.851  | 17.073 |
| 16 | 0.7449 | 22.001 | 12.701 | 15.451 | 11.246 | 22.777 |
| 16 | 0.7459 | 10.255 | 7.894  | 13.198 | 10.282 | 25.702 |

|    |        |        |        |        |        |        |
|----|--------|--------|--------|--------|--------|--------|
| 16 | 0.7469 | 9.104  | 7.320  | 9.317  | 7.298  | 16.546 |
| 16 | 0.7479 | 14.126 | 18.283 | 18.616 | 7.636  | 17.584 |
| 16 | 0.7489 | 8.440  | 9.373  | 8.380  | 7.619  | 18.833 |
| 16 | 0.7499 | 9.039  | 6.278  | 6.973  | 6.584  | 19.991 |
| 16 | 0.7509 | 5.398  | 4.790  | 9.302  | 8.136  | 14.543 |
| 16 | 0.7519 | 12.267 | 10.772 | 14.044 | 3.866  | 6.145  |
| 16 | 0.7529 | 14.987 | 11.725 | 13.819 | 9.608  | 12.393 |
| 16 | 0.7539 | 11.592 | 7.929  | 10.044 | 13.611 | 14.734 |
| 16 | 0.7549 | 11.494 | 11.496 | 10.706 | 12.458 | 16.415 |
| 16 | 0.7559 | 9.996  | 11.233 | 11.299 | 7.842  | 12.912 |
| 16 | 0.7569 | 16.408 | 10.586 | 13.777 | 16.345 | 12.398 |
| 16 | 0.7579 | 31.191 | 31.418 | 23.481 | 11.650 | 17.531 |
| 16 | 0.7589 | 23.340 | 21.161 | 21.072 | 10.150 | 16.994 |
| 16 | 0.7599 | 17.025 | 16.651 | 20.510 | 10.070 | 20.892 |
| 16 | 0.7609 | 22.381 | 24.993 | 28.738 | 15.445 | 30.609 |
| 16 | 0.7619 | 22.188 | 25.456 | 24.585 | 16.142 | 19.332 |
| 16 | 0.7629 | 8.499  | 13.206 | 16.957 | 15.817 | 21.763 |
| 16 | 0.7639 | 10.181 | 8.925  | 12.207 | 7.189  | 15.760 |
| 16 | 0.7649 | 9.229  | 9.657  | 13.383 | 11.272 | 13.338 |
| 16 | 0.7659 | 17.748 | 15.537 | 18.072 | 22.637 | 25.619 |
| 16 | 0.7669 | 27.117 | 17.113 | 25.529 | 21.706 | 20.367 |
| 16 | 0.7679 | 20.147 | 12.866 | 11.802 | 18.877 | 19.039 |
| 16 | 0.7689 | 13.163 | 7.265  | 7.016  | 17.251 | 15.740 |
| 16 | 0.7699 | 11.281 | 7.344  | 12.300 | 12.242 | 19.901 |
| 16 | 0.7709 | 13.485 | 10.265 | 14.388 | 15.820 | 28.260 |
| 16 | 0.7719 | 11.424 | 10.042 | 11.234 | 14.399 | 17.218 |
| 16 | 0.7729 | 14.302 | 16.135 | 20.730 | 10.688 | 17.916 |
| 16 | 0.7739 | 21.236 | 19.013 | 17.006 | 12.863 | 27.249 |
| 16 | 0.7749 | 13.970 | 10.359 | 10.441 | 20.928 | 25.754 |
| 16 | 0.7759 | 0.000  | 0.000  | 0.000  | 0.000  | 0.000  |
| 17 | 0.0017 | 0.000  | 0.000  | 0.000  | 0.000  | 0.000  |
| 17 | 0.0027 | 14.920 | 15.041 | 17.413 | 24.499 | 21.972 |
| 17 | 0.0037 | 8.996  | 7.868  | 11.442 | 12.816 | 8.420  |
| 17 | 0.0047 | 20.696 | 18.577 | 20.282 | 16.377 | 9.984  |
| 17 | 0.0057 | 19.468 | 20.977 | 14.316 | 18.470 | 27.100 |
| 17 | 0.0067 | 16.556 | 11.066 | 13.847 | 13.561 | 15.161 |
| 17 | 0.0077 | 16.916 | 14.989 | 16.435 | 12.579 | 11.007 |
| 17 | 0.0087 | 13.448 | 13.885 | 15.142 | 14.536 | 5.951  |
| 17 | 0.0097 | 19.673 | 17.049 | 22.174 | 15.719 | 7.429  |
| 17 | 0.0107 | 11.004 | 7.187  | 10.156 | 6.666  | 13.730 |
| 17 | 0.0117 | 10.008 | 10.644 | 13.727 | 22.842 | 15.533 |
| 17 | 0.0127 | 8.390  | 7.631  | 10.089 | 22.748 | 22.440 |
| 17 | 0.0137 | 11.470 | 18.055 | 18.470 | 27.612 | 20.069 |
| 17 | 0.0147 | 7.045  | 12.591 | 12.498 | 18.959 | 11.375 |
| 17 | 0.0157 | 14.098 | 16.405 | 20.295 | 16.444 | 5.009  |
| 17 | 0.0167 | 12.560 | 10.739 | 15.476 | 13.051 | 8.655  |
| 17 | 0.0177 | 8.414  | 5.341  | 8.642  | 7.213  | 13.115 |
| 17 | 0.0187 | 11.333 | 9.373  | 12.474 | 14.942 | 17.091 |
| 17 | 0.0197 | 12.867 | 11.409 | 18.898 | 15.053 | 13.824 |
| 17 | 0.0207 | 9.741  | 11.453 | 8.870  | 19.135 | 17.560 |

|    |        |        |        |        |        |        |
|----|--------|--------|--------|--------|--------|--------|
| 17 | 0.0217 | 9.328  | 7.904  | 9.613  | 14.517 | 19.509 |
| 17 | 0.0227 | 11.660 | 15.065 | 9.123  | 18.786 | 16.740 |
| 17 | 0.0237 | 7.966  | 7.277  | 8.121  | 8.934  | 12.734 |
| 17 | 0.0247 | 16.738 | 16.534 | 17.085 | 11.054 | 20.021 |
| 17 | 0.0257 | 11.572 | 5.533  | 9.355  | 17.833 | 19.473 |
| 17 | 0.0267 | 16.925 | 9.316  | 11.274 | 10.166 | 21.373 |
| 17 | 0.0277 | 15.125 | 7.494  | 7.118  | 8.476  | 11.201 |
| 17 | 0.0287 | 7.530  | 4.384  | 7.725  | 9.872  | 9.570  |
| 17 | 0.0297 | 13.870 | 10.057 | 12.336 | 21.089 | 20.495 |
| 17 | 0.0307 | 9.572  | 7.915  | 9.456  | 12.506 | 26.492 |
| 17 | 0.0317 | 11.374 | 9.814  | 11.745 | 11.876 | 12.796 |
| 17 | 0.0327 | 9.395  | 4.615  | 7.398  | 12.857 | 11.044 |
| 17 | 0.0337 | 12.782 | 14.895 | 13.407 | 13.767 | 14.152 |
| 17 | 0.0347 | 14.247 | 21.235 | 16.567 | 23.104 | 5.751  |
| 17 | 0.0357 | 10.139 | 11.253 | 14.143 | 19.760 | 6.833  |
| 17 | 0.0367 | 6.212  | 6.127  | 10.223 | 15.985 | 7.043  |
| 17 | 0.0377 | 9.091  | 11.155 | 12.586 | 18.994 | 10.507 |
| 17 | 0.0387 | 8.929  | 14.977 | 14.626 | 16.417 | 8.191  |
| 17 | 0.0397 | 9.159  | 10.732 | 6.473  | 10.542 | 20.785 |
| 17 | 0.0407 | 9.677  | 7.511  | 5.822  | 15.475 | 15.462 |
| 17 | 0.0417 | 5.944  | 7.405  | 2.615  | 11.984 | 7.538  |
| 17 | 0.0427 | 17.879 | 12.816 | 14.619 | 10.364 | 21.625 |
| 17 | 0.0437 | 11.696 | 14.545 | 18.690 | 11.457 | 15.110 |
| 17 | 0.0447 | 12.297 | 16.975 | 15.350 | 23.807 | 17.384 |
| 17 | 0.0457 | 13.851 | 16.793 | 14.399 | 19.196 | 12.643 |
| 17 | 0.0467 | 9.478  | 10.711 | 10.607 | 18.476 | 17.187 |
| 17 | 0.0477 | 12.619 | 17.045 | 11.446 | 11.971 | 9.569  |
| 17 | 0.0487 | 10.473 | 16.068 | 8.217  | 21.381 | 13.702 |
| 17 | 0.0497 | 8.616  | 20.423 | 11.175 | 22.424 | 13.592 |
| 17 | 0.0507 | 9.754  | 9.458  | 8.720  | 24.237 | 15.002 |
| 17 | 0.0517 | 12.795 | 8.271  | 14.050 | 12.903 | 14.946 |
| 17 | 0.0527 | 12.624 | 15.902 | 13.138 | 12.961 | 14.873 |
| 17 | 0.0537 | 9.312  | 12.907 | 9.115  | 10.814 | 5.956  |
| 17 | 0.0547 | 16.347 | 21.589 | 18.135 | 13.465 | 7.889  |
| 17 | 0.0557 | 13.467 | 22.620 | 16.989 | 20.487 | 7.090  |
| 17 | 0.0567 | 10.521 | 12.496 | 11.640 | 21.342 | 15.871 |
| 17 | 0.0577 | 15.481 | 13.828 | 12.861 | 21.639 | 7.098  |
| 17 | 0.0587 | 19.396 | 14.314 | 17.144 | 35.245 | 22.874 |
| 17 | 0.0597 | 20.961 | 12.430 | 14.620 | 11.601 | 16.362 |
| 17 | 0.0607 | 19.696 | 20.148 | 9.660  | 16.342 | 12.012 |
| 17 | 0.0617 | 18.303 | 25.595 | 12.243 | 20.781 | 14.707 |
| 17 | 0.0627 | 18.615 | 17.382 | 18.333 | 12.507 | 7.958  |
| 17 | 0.0637 | 12.956 | 18.279 | 15.528 | 23.815 | 5.089  |
| 17 | 0.0647 | 13.879 | 5.125  | 11.903 | 18.267 | 8.291  |
| 17 | 0.0657 | 9.952  | 10.474 | 12.968 | 21.015 | 11.857 |
| 17 | 0.0667 | 16.134 | 24.170 | 19.154 | 21.747 | 20.495 |
| 17 | 0.0677 | 16.515 | 24.571 | 15.801 | 20.325 | 14.826 |
| 17 | 0.0687 | 18.117 | 14.898 | 18.661 | 10.680 | 11.636 |
| 17 | 0.0697 | 13.230 | 14.315 | 13.275 | 14.687 | 3.656  |
| 17 | 0.0707 | 13.537 | 9.127  | 9.987  | 21.176 | 18.172 |

|    |        |        |        |        |        |        |
|----|--------|--------|--------|--------|--------|--------|
| 17 | 0.0717 | 15.016 | 16.170 | 6.394  | 24.533 | 7.476  |
| 17 | 0.0727 | 16.830 | 11.894 | 9.433  | 19.197 | 14.862 |
| 17 | 0.0737 | 15.382 | 10.173 | 10.067 | 13.316 | 9.954  |
| 17 | 0.0747 | 9.156  | 8.170  | 9.989  | 18.317 | 12.241 |
| 17 | 0.0757 | 14.131 | 8.185  | 11.923 | 11.003 | 9.767  |
| 17 | 0.0767 | 8.067  | 6.179  | 8.367  | 8.346  | 6.315  |
| 17 | 0.0777 | 9.547  | 8.579  | 8.954  | 8.051  | 12.566 |
| 17 | 0.0787 | 8.308  | 6.872  | 6.371  | 10.112 | 11.996 |
| 17 | 0.0797 | 19.607 | 17.261 | 13.081 | 18.204 | 14.984 |
| 17 | 0.0807 | 22.788 | 17.895 | 18.085 | 11.783 | 8.335  |
| 17 | 0.0817 | 26.326 | 15.919 | 20.092 | 10.547 | 10.401 |
| 17 | 0.0827 | 12.798 | 11.032 | 14.807 | 21.329 | 30.001 |
| 17 | 0.0837 | 7.500  | 13.076 | 10.071 | 15.832 | 14.485 |
| 17 | 0.0847 | 11.270 | 12.569 | 10.523 | 22.967 | 21.591 |
| 17 | 0.0857 | 9.708  | 15.177 | 11.383 | 11.191 | 10.108 |
| 17 | 0.0867 | 9.244  | 15.622 | 16.584 | 13.131 | 12.285 |
| 17 | 0.0877 | 10.766 | 12.578 | 11.134 | 4.233  | 5.686  |
| 17 | 0.0887 | 9.403  | 11.899 | 7.118  | 16.135 | 13.699 |
| 17 | 0.0897 | 19.827 | 20.358 | 11.195 | 22.736 | 17.643 |
| 17 | 0.0907 | 11.964 | 22.637 | 11.087 | 17.294 | 20.933 |
| 17 | 0.0917 | 8.039  | 3.818  | 7.493  | 7.721  | 10.110 |
| 17 | 0.0927 | 11.651 | 14.963 | 10.793 | 26.143 | 22.310 |
| 17 | 0.0937 | 10.484 | 21.562 | 12.108 | 22.741 | 19.339 |
| 17 | 0.0947 | 11.696 | 16.226 | 8.236  | 17.039 | 6.468  |
| 17 | 0.0957 | 12.261 | 13.618 | 9.042  | 7.403  | 10.313 |
| 17 | 0.0967 | 15.655 | 18.999 | 14.693 | 14.598 | 16.210 |
| 17 | 0.0977 | 18.712 | 21.454 | 17.408 | 14.741 | 9.400  |
| 17 | 0.0987 | 25.611 | 21.470 | 18.251 | 2.921  | 12.614 |
| 17 | 0.0997 | 16.600 | 16.202 | 13.651 | 5.390  | 11.029 |
| 17 | 0.1007 | 16.894 | 15.965 | 16.762 | 4.914  | 6.799  |
| 17 | 0.1017 | 16.903 | 15.958 | 16.636 | 4.965  | 6.821  |
| 17 | 0.1027 | 16.890 | 15.933 | 16.488 | 5.015  | 6.840  |
| 17 | 0.1037 | 13.924 | 8.309  | 12.262 | 13.231 | 7.725  |
| 17 | 0.1047 | 15.716 | 9.011  | 12.009 | 16.110 | 12.955 |
| 17 | 0.1057 | 21.851 | 15.391 | 15.994 | 22.930 | 12.371 |
| 17 | 0.1067 | 20.524 | 19.173 | 15.781 | 18.539 | 15.045 |
| 17 | 0.1077 | 20.541 | 19.166 | 15.767 | 18.528 | 14.986 |
| 17 | 0.1087 | 21.838 | 16.349 | 15.306 | 10.825 | 14.498 |
| 17 | 0.1097 | 21.960 | 16.366 | 15.280 | 10.783 | 14.457 |
| 17 | 0.1107 | 22.079 | 16.379 | 15.250 | 10.742 | 14.428 |
| 17 | 0.1117 | 22.196 | 16.388 | 15.218 | 10.701 | 14.411 |
| 17 | 0.1127 | 22.309 | 16.392 | 15.183 | 10.662 | 14.407 |
| 17 | 0.1137 | 20.274 | 10.277 | 14.673 | 8.964  | 14.399 |
| 17 | 0.1147 | 20.273 | 10.247 | 14.627 | 8.909  | 14.297 |
| 17 | 0.1157 | 28.929 | 22.715 | 21.864 | 9.624  | 22.492 |
| 17 | 0.1167 | 11.109 | 9.948  | 7.365  | 13.749 | 22.487 |
| 17 | 0.1177 | 26.058 | 11.256 | 19.474 | 9.812  | 15.160 |
| 17 | 0.1187 | 21.618 | 10.494 | 17.219 | 7.826  | 16.935 |
| 17 | 0.1197 | 9.760  | 4.898  | 9.636  | 6.171  | 5.930  |
| 17 | 0.1207 | 13.522 | 14.613 | 8.372  | 16.357 | 19.597 |

|    |        |        |        |        |        |        |
|----|--------|--------|--------|--------|--------|--------|
| 17 | 0.1217 | 18.059 | 15.905 | 17.464 | 9.031  | 20.052 |
| 17 | 0.1227 | 21.740 | 20.386 | 20.815 | 9.428  | 21.510 |
| 17 | 0.1237 | 24.777 | 15.081 | 22.892 | 13.618 | 17.164 |
| 17 | 0.1247 | 22.275 | 15.329 | 21.068 | 10.159 | 21.817 |
| 17 | 0.1257 | 25.710 | 18.990 | 22.084 | 5.217  | 18.096 |
| 17 | 0.1267 | 22.669 | 15.485 | 17.499 | 17.749 | 17.841 |
| 17 | 0.1277 | 26.918 | 18.924 | 18.106 | 19.394 | 28.204 |
| 17 | 0.1287 | 19.807 | 21.109 | 18.760 | 19.054 | 14.565 |
| 17 | 0.1297 | 15.320 | 15.305 | 11.354 | 10.718 | 11.793 |
| 17 | 0.1307 | 19.846 | 16.329 | 10.989 | 8.884  | 15.093 |
| 17 | 0.1317 | 26.064 | 20.472 | 17.016 | 15.628 | 15.867 |
| 17 | 0.1327 | 15.069 | 10.640 | 9.625  | 18.797 | 9.229  |
| 17 | 0.1337 | 16.259 | 11.216 | 8.141  | 10.562 | 27.581 |
| 17 | 0.1347 | 15.948 | 10.898 | 9.960  | 15.636 | 9.848  |
| 17 | 0.1357 | 20.272 | 15.421 | 11.414 | 16.318 | 13.616 |
| 17 | 0.1367 | 14.102 | 9.016  | 8.791  | 16.589 | 24.437 |
| 17 | 0.1377 | 16.537 | 17.423 | 10.010 | 15.848 | 31.425 |
| 17 | 0.1387 | 15.747 | 10.577 | 10.195 | 8.152  | 22.252 |
| 17 | 0.1397 | 14.580 | 13.526 | 7.555  | 16.983 | 22.621 |
| 17 | 0.1407 | 10.019 | 12.504 | 6.640  | 17.602 | 12.586 |
| 17 | 0.1417 | 11.367 | 13.039 | 8.044  | 12.256 | 14.188 |
| 17 | 0.1427 | 13.857 | 12.410 | 9.450  | 13.625 | 15.993 |
| 17 | 0.1437 | 12.346 | 9.831  | 5.370  | 20.234 | 16.349 |
| 17 | 0.1447 | 7.891  | 6.083  | 3.485  | 15.120 | 20.649 |
| 17 | 0.1457 | 17.433 | 13.732 | 11.703 | 18.578 | 20.296 |
| 17 | 0.1467 | 22.252 | 23.581 | 11.917 | 17.030 | 28.748 |
| 17 | 0.1477 | 16.993 | 20.102 | 8.203  | 13.496 | 31.225 |
| 17 | 0.1487 | 19.936 | 17.705 | 7.799  | 12.644 | 21.825 |
| 17 | 0.1497 | 8.951  | 9.539  | 5.512  | 22.015 | 15.296 |
| 17 | 0.1507 | 9.846  | 8.140  | 7.269  | 19.958 | 21.033 |
| 17 | 0.1517 | 12.872 | 15.234 | 13.201 | 18.997 | 23.125 |
| 17 | 0.1527 | 24.487 | 16.975 | 19.693 | 11.644 | 24.288 |
| 17 | 0.1537 | 18.296 | 13.267 | 7.203  | 7.932  | 19.819 |
| 17 | 0.1547 | 16.053 | 12.493 | 13.716 | 18.974 | 17.895 |
| 17 | 0.1557 | 11.847 | 9.182  | 7.228  | 6.212  | 13.450 |
| 17 | 0.1567 | 16.631 | 15.649 | 10.138 | 15.762 | 17.370 |
| 17 | 0.1577 | 12.508 | 14.906 | 13.859 | 15.289 | 22.856 |
| 17 | 0.1587 | 16.641 | 14.721 | 10.308 | 12.689 | 18.237 |
| 17 | 0.1597 | 13.001 | 9.905  | 6.779  | 22.038 | 28.967 |
| 17 | 0.1607 | 12.497 | 13.196 | 7.888  | 16.248 | 16.737 |
| 17 | 0.1617 | 6.202  | 9.748  | 7.188  | 14.607 | 18.061 |
| 17 | 0.1627 | 14.848 | 16.082 | 10.023 | 14.502 | 13.496 |
| 17 | 0.1637 | 10.657 | 9.769  | 7.699  | 12.259 | 21.989 |
| 17 | 0.1647 | 11.620 | 10.214 | 11.294 | 14.467 | 21.340 |
| 17 | 0.1657 | 15.244 | 16.329 | 20.594 | 18.643 | 19.679 |
| 17 | 0.1667 | 10.649 | 12.924 | 15.469 | 6.986  | 16.087 |
| 17 | 0.1677 | 16.119 | 17.566 | 20.762 | 5.217  | 11.072 |
| 17 | 0.1687 | 17.236 | 19.382 | 16.772 | 9.659  | 12.575 |
| 17 | 0.1697 | 9.149  | 8.022  | 14.787 | 9.842  | 15.550 |
| 17 | 0.1707 | 15.937 | 13.155 | 19.485 | 9.819  | 17.093 |



|    |        |        |        |        |        |        |
|----|--------|--------|--------|--------|--------|--------|
| 17 | 0.1717 | 19.904 | 14.313 | 17.467 | 11.882 | 18.909 |
| 17 | 0.1727 | 19.416 | 17.194 | 16.706 | 14.922 | 23.032 |
| 17 | 0.1737 | 15.840 | 12.015 | 15.028 | 11.564 | 12.793 |
| 17 | 0.1747 | 8.475  | 9.790  | 9.702  | 15.826 | 15.524 |
| 17 | 0.1757 | 12.511 | 19.369 | 19.767 | 16.747 | 15.626 |
| 17 | 0.1767 | 6.441  | 9.216  | 6.750  | 17.576 | 23.947 |
| 17 | 0.1777 | 7.559  | 5.403  | 8.883  | 4.783  | 24.548 |
| 17 | 0.1787 | 13.175 | 15.530 | 20.143 | 14.561 | 30.086 |
| 17 | 0.1797 | 11.144 | 12.199 | 21.189 | 11.660 | 18.494 |
| 17 | 0.1807 | 17.162 | 12.139 | 19.210 | 18.103 | 22.599 |
| 17 | 0.1817 | 10.521 | 6.892  | 15.004 | 9.877  | 14.718 |
| 17 | 0.1827 | 5.043  | 6.012  | 9.538  | 11.003 | 12.839 |
| 17 | 0.1837 | 17.994 | 13.540 | 14.903 | 24.021 | 23.119 |
| 17 | 0.1847 | 15.614 | 16.208 | 18.348 | 21.486 | 21.102 |
| 17 | 0.1857 | 14.853 | 18.723 | 22.153 | 27.131 | 17.846 |
| 17 | 0.1867 | 8.924  | 9.279  | 4.626  | 14.732 | 18.536 |
| 17 | 0.1877 | 14.499 | 6.496  | 10.467 | 7.239  | 18.325 |
| 17 | 0.1887 | 12.981 | 9.650  | 12.952 | 9.125  | 14.198 |
| 17 | 0.1897 | 15.326 | 9.063  | 6.588  | 14.290 | 21.719 |
| 17 | 0.1907 | 25.749 | 25.479 | 27.643 | 14.157 | 10.272 |
| 17 | 0.1917 | 13.149 | 15.632 | 14.982 | 13.476 | 10.077 |
| 17 | 0.1927 | 10.349 | 12.208 | 11.415 | 20.847 | 19.305 |
| 17 | 0.1937 | 19.783 | 17.532 | 14.144 | 24.326 | 18.136 |
| 17 | 0.1947 | 22.880 | 20.196 | 27.180 | 19.375 | 21.124 |
| 17 | 0.1957 | 13.656 | 11.315 | 14.215 | 14.315 | 14.634 |
| 17 | 0.1967 | 11.797 | 10.636 | 13.669 | 10.415 | 12.507 |
| 17 | 0.1977 | 3.830  | 8.786  | 3.594  | 17.568 | 12.980 |
| 17 | 0.1987 | 9.303  | 16.017 | 10.698 | 13.523 | 13.157 |
| 17 | 0.1997 | 10.761 | 14.598 | 8.765  | 32.622 | 24.787 |
| 17 | 0.2007 | 10.186 | 14.447 | 11.042 | 36.940 | 25.958 |
| 17 | 0.2017 | 10.673 | 19.763 | 11.315 | 26.042 | 8.193  |
| 17 | 0.2027 | 12.845 | 20.233 | 15.603 | 18.594 | 9.466  |
| 17 | 0.2037 | 10.356 | 10.584 | 15.317 | 12.599 | 11.621 |
| 17 | 0.2047 | 4.797  | 5.708  | 7.454  | 6.998  | 9.745  |
| 17 | 0.2057 | 14.823 | 17.521 | 13.650 | 24.289 | 21.649 |
| 17 | 0.2067 | 17.796 | 13.498 | 12.022 | 23.045 | 18.631 |
| 17 | 0.2077 | 12.923 | 9.980  | 10.630 | 19.534 | 12.799 |
| 17 | 0.2087 | 19.113 | 8.257  | 12.682 | 22.169 | 18.576 |
| 17 | 0.2097 | 18.341 | 13.612 | 17.669 | 20.257 | 13.577 |
| 17 | 0.2107 | 8.434  | 10.821 | 8.163  | 10.030 | 10.923 |
| 17 | 0.2117 | 11.089 | 9.809  | 11.244 | 12.717 | 7.403  |
| 17 | 0.2127 | 7.867  | 11.451 | 5.043  | 16.033 | 18.782 |
| 17 | 0.2137 | 21.093 | 15.575 | 13.312 | 17.726 | 14.644 |
| 17 | 0.2147 | 22.682 | 23.283 | 18.184 | 22.877 | 25.032 |
| 17 | 0.2157 | 18.710 | 12.864 | 16.564 | 25.118 | 14.446 |
| 17 | 0.2167 | 14.211 | 9.497  | 14.914 | 15.978 | 25.326 |
| 17 | 0.2177 | 5.040  | 9.794  | 9.809  | 15.464 | 20.227 |
| 17 | 0.2187 | 16.710 | 18.072 | 17.949 | 18.442 | 15.688 |
| 17 | 0.2197 | 27.000 | 26.328 | 27.696 | 10.598 | 23.193 |
| 17 | 0.2207 | 13.553 | 13.939 | 12.637 | 19.498 | 8.736  |

|    |        |        |        |        |        |        |
|----|--------|--------|--------|--------|--------|--------|
| 17 | 0.2217 | 11.693 | 8.375  | 10.841 | 10.286 | 12.338 |
| 17 | 0.2227 | 20.502 | 14.117 | 13.091 | 19.855 | 6.412  |
| 17 | 0.2237 | 26.474 | 20.523 | 22.086 | 12.677 | 12.297 |
| 17 | 0.2247 | 17.469 | 8.065  | 8.400  | 11.207 | 23.939 |
| 17 | 0.2257 | 15.951 | 7.546  | 6.469  | 10.234 | 17.882 |
| 17 | 0.2267 | 18.939 | 15.218 | 15.477 | 14.965 | 9.531  |
| 17 | 0.2277 | 16.021 | 7.918  | 15.118 | 17.507 | 8.734  |
| 17 | 0.2287 | 14.889 | 14.198 | 8.732  | 17.630 | 8.941  |
| 17 | 0.2297 | 12.596 | 9.162  | 9.934  | 7.498  | 8.253  |
| 17 | 0.2307 | 10.820 | 6.471  | 11.128 | 6.552  | 11.594 |
| 17 | 0.2317 | 17.318 | 11.374 | 6.696  | 21.593 | 26.095 |
| 17 | 0.2327 | 15.242 | 14.725 | 12.348 | 19.459 | 10.472 |
| 17 | 0.2337 | 10.745 | 8.175  | 12.598 | 14.709 | 9.966  |
| 17 | 0.2347 | 20.949 | 16.519 | 20.614 | 10.810 | 17.608 |
| 17 | 0.2357 | 20.037 | 13.932 | 16.053 | 10.425 | 16.896 |
| 17 | 0.2367 | 22.220 | 20.257 | 10.565 | 10.291 | 9.435  |
| 17 | 0.2377 | 12.108 | 11.180 | 11.611 | 15.234 | 8.231  |
| 17 | 0.2387 | 8.617  | 5.457  | 4.720  | 9.941  | 19.031 |
| 17 | 0.2397 | 5.594  | 6.300  | 5.299  | 7.918  | 4.722  |
| 17 | 0.2407 | 17.679 | 10.228 | 18.834 | 11.757 | 4.130  |
| 17 | 0.2417 | 19.373 | 12.635 | 13.670 | 10.814 | 13.866 |
| 17 | 0.2427 | 20.796 | 15.242 | 14.686 | 26.653 | 10.496 |
| 17 | 0.2437 | 10.843 | 8.702  | 11.230 | 15.959 | 4.419  |
| 17 | 0.2447 | 2.792  | 9.145  | 6.260  | 8.311  | 10.816 |
| 17 | 0.2457 | 20.177 | 14.645 | 11.203 | 10.761 | 9.965  |
| 17 | 0.2467 | 18.923 | 13.021 | 13.972 | 23.032 | 8.806  |
| 17 | 0.2477 | 14.288 | 15.195 | 8.217  | 26.144 | 12.881 |
| 17 | 0.2487 | 9.003  | 11.106 | 5.218  | 13.037 | 6.746  |
| 17 | 0.2497 | 12.168 | 11.564 | 11.649 | 8.253  | 12.873 |
| 17 | 0.2507 | 16.442 | 9.136  | 14.666 | 14.714 | 12.828 |
| 17 | 0.2517 | 12.393 | 7.237  | 5.990  | 15.435 | 28.747 |
| 17 | 0.2527 | 18.244 | 12.781 | 14.926 | 13.253 | 12.334 |
| 17 | 0.2537 | 12.399 | 4.928  | 8.109  | 4.390  | 16.782 |
| 17 | 0.2547 | 11.822 | 13.127 | 14.250 | 10.275 | 16.402 |
| 17 | 0.2557 | 13.707 | 11.318 | 15.191 | 9.054  | 10.239 |
| 17 | 0.2567 | 19.276 | 18.071 | 17.390 | 10.903 | 10.341 |
| 17 | 0.2577 | 25.794 | 20.645 | 27.083 | 11.961 | 5.286  |
| 17 | 0.2587 | 24.377 | 18.717 | 22.807 | 13.690 | 13.622 |
| 17 | 0.2597 | 8.627  | 8.546  | 7.821  | 18.642 | 21.665 |
| 17 | 0.2607 | 17.887 | 17.899 | 16.833 | 13.156 | 16.516 |
| 17 | 0.2617 | 17.532 | 17.142 | 16.353 | 14.941 | 19.116 |
| 17 | 0.2627 | 11.256 | 8.644  | 8.468  | 8.855  | 9.144  |
| 17 | 0.2637 | 17.278 | 10.656 | 9.622  | 10.962 | 9.835  |
| 17 | 0.2647 | 13.743 | 11.042 | 12.321 | 14.108 | 14.827 |
| 17 | 0.2657 | 12.676 | 16.605 | 6.975  | 11.823 | 12.281 |
| 17 | 0.2667 | 17.886 | 21.078 | 19.496 | 13.354 | 21.603 |
| 17 | 0.2677 | 18.424 | 15.590 | 16.778 | 19.294 | 21.457 |
| 17 | 0.2687 | 14.883 | 14.549 | 15.219 | 12.161 | 20.297 |
| 17 | 0.2697 | 17.972 | 18.325 | 15.593 | 8.833  | 13.465 |
| 17 | 0.2707 | 23.980 | 14.553 | 12.724 | 11.224 | 11.846 |

|    |        |        |        |        |        |        |
|----|--------|--------|--------|--------|--------|--------|
| 17 | 0.2717 | 5.738  | 4.751  | 4.712  | 7.691  | 14.909 |
| 17 | 0.2727 | 19.478 | 11.543 | 15.426 | 12.747 | 18.744 |
| 17 | 0.2737 | 6.242  | 7.110  | 6.522  | 8.600  | 7.290  |
| 17 | 0.2747 | 17.837 | 11.607 | 15.141 | 8.229  | 16.244 |
| 17 | 0.2757 | 14.986 | 9.545  | 11.032 | 8.874  | 15.940 |
| 17 | 0.2767 | 14.255 | 13.188 | 8.805  | 17.674 | 21.599 |
| 17 | 0.2777 | 8.279  | 10.184 | 8.932  | 11.800 | 18.052 |
| 17 | 0.2787 | 16.751 | 12.886 | 17.926 | 8.979  | 24.926 |
| 17 | 0.2797 | 10.586 | 16.261 | 14.266 | 13.459 | 12.179 |
| 17 | 0.2807 | 16.959 | 22.092 | 22.494 | 13.530 | 13.620 |
| 17 | 0.2817 | 17.158 | 22.022 | 22.155 | 15.711 | 20.490 |
| 17 | 0.2827 | 15.106 | 8.515  | 11.205 | 14.604 | 21.016 |
| 17 | 0.2837 | 16.029 | 17.889 | 11.619 | 24.134 | 18.963 |
| 17 | 0.2847 | 17.220 | 18.542 | 17.439 | 7.223  | 7.861  |
| 17 | 0.2857 | 8.811  | 9.751  | 7.759  | 7.219  | 4.703  |
| 17 | 0.2867 | 12.165 | 12.799 | 11.353 | 15.066 | 17.791 |
| 17 | 0.2877 | 12.201 | 12.793 | 11.340 | 15.026 | 17.852 |
| 17 | 0.2887 | 15.594 | 16.348 | 14.737 | 15.236 | 23.262 |
| 17 | 0.2897 | 10.335 | 10.809 | 12.770 | 9.714  | 18.509 |
| 17 | 0.2907 | 14.807 | 13.267 | 7.688  | 8.589  | 15.061 |
| 17 | 0.2917 | 10.604 | 10.016 | 10.469 | 5.315  | 4.609  |
| 17 | 0.2927 | 14.013 | 15.606 | 13.634 | 8.117  | 5.994  |
| 17 | 0.2937 | 13.558 | 18.901 | 12.263 | 15.591 | 7.154  |
| 17 | 0.2947 | 9.803  | 16.839 | 12.944 | 12.453 | 5.022  |
| 17 | 0.2957 | 9.216  | 7.321  | 9.892  | 8.813  | 18.480 |
| 17 | 0.2967 | 9.396  | 7.589  | 9.982  | 8.940  | 18.531 |
| 17 | 0.2977 | 9.150  | 6.718  | 5.352  | 7.831  | 12.498 |
| 17 | 0.2987 | 10.495 | 11.404 | 9.004  | 7.598  | 10.877 |
| 17 | 0.2997 | 19.166 | 13.811 | 13.838 | 12.377 | 13.127 |
| 17 | 0.3007 | 17.628 | 14.808 | 14.178 | 30.670 | 26.578 |
| 17 | 0.3017 | 15.631 | 16.601 | 11.546 | 14.314 | 10.690 |
| 17 | 0.3027 | 10.860 | 13.108 | 10.080 | 15.340 | 7.588  |
| 17 | 0.3037 | 16.769 | 17.585 | 17.727 | 8.578  | 9.749  |
| 17 | 0.3047 | 19.194 | 25.277 | 24.066 | 20.797 | 12.080 |
| 17 | 0.3057 | 21.102 | 24.742 | 19.383 | 9.633  | 14.822 |
| 17 | 0.3067 | 17.257 | 15.169 | 12.712 | 3.535  | 8.179  |
| 17 | 0.3077 | 12.440 | 12.296 | 9.717  | 3.807  | 20.653 |
| 17 | 0.3087 | 10.059 | 9.740  | 7.065  | 16.767 | 18.024 |
| 17 | 0.3097 | 10.478 | 12.502 | 8.910  | 21.003 | 20.760 |
| 17 | 0.3107 | 13.693 | 18.724 | 10.822 | 13.210 | 25.802 |
| 17 | 0.3117 | 11.383 | 17.488 | 12.746 | 16.235 | 27.909 |
| 17 | 0.3127 | 19.328 | 20.736 | 12.556 | 6.529  | 23.480 |
| 17 | 0.3137 | 13.634 | 7.814  | 11.236 | 11.084 | 19.469 |
| 17 | 0.3147 | 22.560 | 21.749 | 13.389 | 12.998 | 31.657 |
| 17 | 0.3157 | 25.106 | 25.271 | 19.101 | 8.606  | 11.924 |
| 17 | 0.3167 | 17.588 | 17.453 | 15.209 | 7.333  | 18.133 |
| 17 | 0.3177 | 15.827 | 20.946 | 10.984 | 10.534 | 15.018 |
| 17 | 0.3187 | 15.440 | 21.855 | 15.903 | 12.650 | 20.063 |
| 17 | 0.3197 | 12.908 | 17.732 | 17.319 | 14.062 | 16.516 |
| 17 | 0.3207 | 13.588 | 25.022 | 10.983 | 18.921 | 19.329 |

|    |        |        |        |        |        |        |
|----|--------|--------|--------|--------|--------|--------|
| 17 | 0.3217 | 17.683 | 15.409 | 19.291 | 11.914 | 12.672 |
| 17 | 0.3227 | 20.937 | 12.733 | 10.065 | 12.950 | 19.214 |
| 17 | 0.3237 | 10.670 | 13.622 | 4.332  | 19.768 | 16.641 |
| 17 | 0.3247 | 20.787 | 27.922 | 15.318 | 19.102 | 6.291  |
| 17 | 0.3257 | 17.255 | 26.566 | 14.085 | 14.895 | 6.069  |
| 17 | 0.3267 | 23.771 | 25.659 | 15.076 | 14.206 | 8.573  |
| 17 | 0.3277 | 22.678 | 25.229 | 16.699 | 21.870 | 12.192 |
| 17 | 0.3287 | 25.729 | 26.222 | 23.062 | 19.156 | 18.777 |
| 17 | 0.3297 | 16.478 | 19.380 | 14.190 | 21.569 | 17.340 |
| 17 | 0.3307 | 19.752 | 23.040 | 15.526 | 13.506 | 8.919  |
| 17 | 0.3317 | 22.472 | 23.502 | 14.230 | 9.925  | 15.010 |
| 17 | 0.3327 | 13.618 | 14.283 | 16.032 | 7.315  | 14.369 |
| 17 | 0.3337 | 8.338  | 4.493  | 7.587  | 4.813  | 8.977  |
| 17 | 0.3347 | 11.937 | 3.680  | 10.986 | 3.352  | 12.167 |
| 17 | 0.3357 | 18.144 | 12.479 | 12.680 | 9.666  | 14.999 |
| 17 | 0.3367 | 17.398 | 11.356 | 12.156 | 15.040 | 15.890 |
| 17 | 0.3377 | 18.077 | 13.169 | 13.417 | 13.116 | 16.179 |
| 17 | 0.3387 | 15.787 | 19.236 | 17.661 | 9.743  | 14.284 |
| 17 | 0.3397 | 15.662 | 18.997 | 21.270 | 11.640 | 16.748 |
| 17 | 0.3407 | 8.173  | 12.263 | 8.231  | 14.503 | 13.414 |
| 17 | 0.3417 | 18.319 | 15.640 | 13.441 | 10.531 | 7.985  |
| 17 | 0.3427 | 8.666  | 7.513  | 3.469  | 5.387  | 4.938  |
| 17 | 0.3437 | 10.611 | 11.779 | 9.550  | 11.481 | 3.032  |
| 17 | 0.3447 | 13.265 | 13.285 | 6.834  | 7.909  | 1.948  |
| 17 | 0.3457 | 14.470 | 13.833 | 7.141  | 10.399 | 5.960  |
| 17 | 0.3467 | 10.905 | 11.310 | 11.167 | 3.005  | 9.006  |
| 17 | 0.3477 | 20.408 | 14.867 | 9.931  | 12.023 | 27.979 |
| 17 | 0.3487 | 13.341 | 13.272 | 6.310  | 16.201 | 18.271 |
| 17 | 0.3497 | 4.842  | 3.432  | 3.615  | 1.871  | 8.086  |
| 17 | 0.3507 | 4.837  | 3.441  | 3.631  | 1.884  | 8.094  |
| 17 | 0.3517 | 9.489  | 3.864  | 5.269  | 4.456  | 6.319  |
| 17 | 0.3527 | 12.527 | 7.258  | 9.606  | 5.249  | 1.755  |
| 17 | 0.3537 | 18.232 | 16.423 | 14.749 | 22.798 | 13.171 |
| 17 | 0.3547 | 18.165 | 19.133 | 13.878 | 23.888 | 14.152 |
| 17 | 0.3557 | 20.569 | 18.673 | 16.154 | 21.208 | 23.643 |
| 17 | 0.3567 | 20.808 | 18.363 | 20.669 | 16.960 | 21.013 |
| 17 | 0.3577 | 18.004 | 15.235 | 13.930 | 15.293 | 6.290  |
| 17 | 0.3587 | 28.815 | 27.465 | 26.287 | 11.210 | 14.257 |
| 17 | 0.3597 | 6.664  | 8.926  | 9.425  | 4.576  | 10.149 |
| 17 | 0.3607 | 8.250  | 5.043  | 5.728  | 14.043 | 3.719  |
| 17 | 0.3617 | 23.937 | 29.046 | 24.871 | 20.065 | 11.361 |
| 17 | 0.3627 | 15.971 | 19.941 | 24.102 | 14.310 | 10.137 |
| 17 | 0.3637 | 20.948 | 17.433 | 12.407 | 13.971 | 7.948  |
| 17 | 0.3647 | 7.098  | 8.332  | 5.860  | 6.006  | 12.096 |
| 17 | 0.3657 | 18.018 | 16.146 | 16.647 | 19.326 | 14.442 |
| 17 | 0.3667 | 17.547 | 14.181 | 18.814 | 17.935 | 9.007  |
| 17 | 0.3677 | 16.268 | 15.679 | 11.481 | 16.843 | 16.761 |
| 17 | 0.3687 | 20.097 | 16.401 | 14.130 | 23.587 | 15.701 |
| 17 | 0.3697 | 17.272 | 12.100 | 11.258 | 7.811  | 7.379  |
| 17 | 0.3707 | 13.145 | 13.296 | 5.958  | 13.596 | 8.988  |

|    |        |        |        |        |        |        |
|----|--------|--------|--------|--------|--------|--------|
| 17 | 0.3717 | 14.488 | 15.484 | 12.245 | 12.236 | 6.069  |
| 17 | 0.3727 | 15.854 | 14.671 | 9.707  | 13.306 | 12.296 |
| 17 | 0.3737 | 8.113  | 6.829  | 2.268  | 12.878 | 9.062  |
| 17 | 0.3747 | 10.564 | 12.199 | 7.627  | 9.744  | 9.115  |
| 17 | 0.3757 | 17.839 | 17.877 | 16.816 | 8.307  | 16.602 |
| 17 | 0.3767 | 14.726 | 13.678 | 12.495 | 15.456 | 10.989 |
| 17 | 0.3777 | 16.085 | 11.959 | 11.843 | 19.982 | 8.453  |
| 17 | 0.3787 | 22.918 | 16.983 | 16.158 | 17.078 | 11.948 |
| 17 | 0.3797 | 13.323 | 11.873 | 13.005 | 13.131 | 9.744  |
| 17 | 0.3807 | 16.620 | 13.698 | 12.605 | 8.357  | 7.627  |
| 17 | 0.3817 | 14.125 | 11.819 | 8.566  | 14.872 | 7.142  |
| 17 | 0.3827 | 22.872 | 21.264 | 24.385 | 15.890 | 13.423 |
| 17 | 0.3837 | 28.443 | 25.311 | 28.272 | 13.926 | 14.817 |
| 17 | 0.3847 | 16.637 | 15.958 | 17.576 | 15.901 | 10.170 |
| 17 | 0.3857 | 19.890 | 14.067 | 17.158 | 11.413 | 16.681 |
| 17 | 0.3867 | 25.995 | 15.790 | 16.218 | 24.680 | 11.204 |
| 17 | 0.3877 | 11.597 | 9.844  | 9.625  | 14.153 | 17.241 |
| 17 | 0.3887 | 23.279 | 11.350 | 16.875 | 10.584 | 14.886 |
| 17 | 0.3897 | 19.047 | 12.687 | 12.504 | 12.514 | 19.214 |
| 17 | 0.3907 | 20.966 | 15.548 | 12.122 | 13.099 | 11.858 |
| 17 | 0.3917 | 19.497 | 18.400 | 10.823 | 17.677 | 13.657 |
| 17 | 0.3927 | 19.627 | 18.434 | 10.886 | 17.518 | 13.568 |
| 17 | 0.3937 | 19.757 | 18.460 | 10.945 | 17.362 | 13.483 |
| 17 | 0.3947 | 24.128 | 23.026 | 20.328 | 16.669 | 11.336 |
| 17 | 0.3957 | 20.667 | 12.924 | 16.068 | 9.956  | 7.516  |
| 17 | 0.3967 | 16.605 | 14.867 | 16.478 | 12.730 | 7.069  |
| 17 | 0.3977 | 15.918 | 7.923  | 16.513 | 12.707 | 13.214 |
| 17 | 0.3987 | 15.679 | 6.159  | 13.287 | 18.186 | 12.285 |
| 17 | 0.3997 | 13.985 | 10.706 | 8.767  | 11.956 | 14.487 |
| 17 | 0.4007 | 12.540 | 10.675 | 12.715 | 2.846  | 16.962 |
| 17 | 0.4017 | 23.620 | 21.691 | 27.759 | 6.783  | 8.722  |
| 17 | 0.4027 | 24.974 | 20.108 | 25.685 | 3.500  | 14.788 |
| 17 | 0.4037 | 24.985 | 19.866 | 25.537 | 3.449  | 14.799 |
| 17 | 0.4047 | 22.123 | 16.732 | 21.763 | 9.988  | 9.778  |
| 17 | 0.4057 | 18.824 | 15.763 | 10.921 | 13.954 | 8.817  |
| 17 | 0.4067 | 10.858 | 8.747  | 12.523 | 9.853  | 5.894  |
| 17 | 0.4077 | 16.127 | 14.016 | 11.631 | 9.810  | 5.834  |
| 17 | 0.4087 | 18.625 | 20.850 | 14.812 | 10.860 | 17.089 |
| 17 | 0.4097 | 16.149 | 11.897 | 7.152  | 7.734  | 19.076 |
| 17 | 0.4107 | 32.619 | 25.442 | 19.899 | 13.648 | 16.768 |
| 17 | 0.4117 | 30.504 | 20.699 | 20.933 | 14.462 | 12.348 |
| 17 | 0.4127 | 17.764 | 6.544  | 10.481 | 8.620  | 10.024 |
| 17 | 0.4137 | 13.092 | 3.489  | 4.963  | 9.644  | 12.265 |
| 17 | 0.4147 | 23.058 | 12.914 | 14.247 | 9.041  | 13.196 |
| 17 | 0.4157 | 24.459 | 18.463 | 21.003 | 12.549 | 10.388 |
| 17 | 0.4167 | 11.196 | 13.551 | 9.025  | 12.589 | 5.384  |
| 17 | 0.4177 | 18.526 | 14.126 | 14.176 | 15.881 | 8.207  |
| 17 | 0.4187 | 19.870 | 15.324 | 16.133 | 18.734 | 9.901  |
| 17 | 0.4197 | 16.898 | 11.424 | 11.141 | 14.053 | 19.829 |
| 17 | 0.4207 | 14.442 | 14.550 | 9.839  | 19.984 | 12.621 |

|    |        |        |        |        |        |        |
|----|--------|--------|--------|--------|--------|--------|
| 17 | 0.4217 | 21.106 | 21.031 | 19.929 | 17.805 | 12.831 |
| 17 | 0.4227 | 19.716 | 17.708 | 15.629 | 17.116 | 8.483  |
| 17 | 0.4237 | 15.691 | 17.100 | 17.940 | 12.375 | 10.048 |
| 17 | 0.4247 | 9.778  | 7.533  | 9.144  | 6.706  | 5.462  |
| 17 | 0.4257 | 13.110 | 12.362 | 19.728 | 6.603  | 10.394 |
| 17 | 0.4267 | 3.923  | 1.837  | 5.127  | 13.479 | 10.364 |
| 17 | 0.4277 | 14.434 | 9.888  | 12.121 | 10.102 | 9.805  |
| 17 | 0.4287 | 16.171 | 11.326 | 11.941 | 9.436  | 7.958  |
| 17 | 0.4297 | 23.275 | 20.618 | 18.714 | 16.270 | 14.863 |
| 17 | 0.4307 | 23.408 | 14.258 | 14.731 | 12.472 | 14.868 |
| 17 | 0.4317 | 18.560 | 10.606 | 18.037 | 16.768 | 16.706 |
| 17 | 0.4327 | 18.213 | 10.697 | 12.621 | 12.519 | 9.745  |
| 17 | 0.4337 | 15.184 | 10.066 | 10.856 | 4.518  | 9.779  |
| 17 | 0.4347 | 17.297 | 18.100 | 11.292 | 11.746 | 6.893  |
| 17 | 0.4357 | 17.407 | 11.712 | 12.300 | 9.925  | 15.438 |
| 17 | 0.4367 | 16.615 | 8.824  | 10.171 | 6.919  | 9.272  |
| 17 | 0.4377 | 18.944 | 9.617  | 12.365 | 9.990  | 8.373  |
| 17 | 0.4387 | 12.214 | 6.431  | 5.215  | 8.191  | 11.869 |
| 17 | 0.4397 | 9.795  | 6.138  | 9.632  | 5.353  | 9.070  |
| 17 | 0.4407 | 11.818 | 8.766  | 12.687 | 4.010  | 4.394  |
| 17 | 0.4417 | 12.141 | 15.630 | 7.016  | 16.396 | 7.737  |
| 17 | 0.4427 | 10.650 | 12.867 | 6.226  | 20.269 | 7.678  |
| 17 | 0.4437 | 20.419 | 12.194 | 11.153 | 12.431 | 11.774 |
| 17 | 0.4447 | 20.108 | 12.453 | 10.993 | 18.297 | 18.087 |
| 17 | 0.4457 | 11.085 | 9.634  | 6.205  | 8.790  | 8.816  |
| 17 | 0.4467 | 10.943 | 7.659  | 9.858  | 9.656  | 10.387 |
| 17 | 0.4477 | 22.872 | 11.102 | 20.553 | 8.038  | 10.774 |
| 17 | 0.4487 | 15.963 | 7.235  | 11.430 | 11.003 | 6.884  |
| 17 | 0.4497 | 20.248 | 8.427  | 12.765 | 9.878  | 8.562  |
| 17 | 0.4507 | 15.911 | 10.558 | 11.942 | 18.583 | 14.795 |
| 17 | 0.4517 | 13.526 | 7.048  | 10.265 | 10.264 | 10.216 |
| 17 | 0.4527 | 10.474 | 5.812  | 3.818  | 8.770  | 8.907  |
| 17 | 0.4537 | 27.473 | 23.116 | 26.668 | 16.811 | 9.909  |
| 17 | 0.4547 | 16.016 | 11.956 | 13.632 | 12.824 | 11.996 |
| 17 | 0.4557 | 14.906 | 9.266  | 9.690  | 11.229 | 20.101 |
| 17 | 0.4567 | 14.112 | 13.347 | 12.820 | 11.387 | 6.854  |
| 17 | 0.4577 | 19.208 | 12.229 | 11.621 | 6.175  | 11.618 |
| 17 | 0.4587 | 23.660 | 18.612 | 15.905 | 10.960 | 15.011 |
| 17 | 0.4597 | 16.576 | 9.991  | 6.954  | 10.260 | 11.185 |
| 17 | 0.4607 | 12.380 | 12.632 | 15.484 | 9.208  | 6.505  |
| 17 | 0.4617 | 13.030 | 7.502  | 10.067 | 7.149  | 8.670  |
| 17 | 0.4627 | 18.975 | 16.215 | 13.643 | 19.616 | 4.369  |
| 17 | 0.4637 | 21.964 | 19.305 | 20.043 | 18.606 | 6.462  |
| 17 | 0.4647 | 15.076 | 9.075  | 10.299 | 10.628 | 8.377  |
| 17 | 0.4657 | 14.708 | 12.192 | 11.588 | 6.750  | 7.513  |
| 17 | 0.4667 | 19.183 | 13.988 | 13.275 | 7.436  | 7.485  |
| 17 | 0.4677 | 25.049 | 23.615 | 20.962 | 16.327 | 14.064 |
| 17 | 0.4687 | 18.959 | 17.296 | 15.960 | 13.334 | 6.270  |
| 17 | 0.4697 | 22.793 | 16.206 | 15.395 | 13.205 | 10.816 |
| 17 | 0.4707 | 19.730 | 11.066 | 18.082 | 17.960 | 14.613 |

|    |        |        |        |        |        |        |
|----|--------|--------|--------|--------|--------|--------|
| 17 | 0.4717 | 18.688 | 11.655 | 13.552 | 10.312 | 20.963 |
| 17 | 0.4727 | 12.150 | 11.505 | 11.436 | 6.375  | 7.931  |
| 17 | 0.4737 | 11.523 | 18.846 | 18.734 | 17.604 | 12.300 |
| 17 | 0.4747 | 10.077 | 6.248  | 6.566  | 13.709 | 7.700  |
| 17 | 0.4757 | 12.935 | 7.928  | 10.449 | 11.081 | 11.388 |
| 17 | 0.4767 | 12.296 | 7.507  | 10.071 | 11.156 | 11.449 |
| 17 | 0.4777 | 12.546 | 7.577  | 9.746  | 7.633  | 9.230  |
| 17 | 0.4787 | 12.395 | 6.803  | 6.548  | 5.509  | 10.606 |
| 17 | 0.4797 | 5.356  | 4.156  | 5.186  | 11.455 | 7.361  |
| 17 | 0.4807 | 6.809  | 4.495  | 5.392  | 8.051  | 5.311  |
| 17 | 0.4817 | 5.716  | 5.116  | 5.845  | 7.977  | 4.082  |
| 17 | 0.4827 | 30.009 | 9.469  | 11.553 | 17.386 | 9.541  |
| 17 | 0.4837 | 7.095  | 5.742  | 5.063  | 10.491 | 9.132  |
| 17 | 0.4847 | 14.226 | 9.205  | 7.823  | 10.088 | 7.511  |
| 17 | 0.4857 | 22.130 | 14.083 | 13.230 | 14.931 | 15.863 |
| 17 | 0.4867 | 17.599 | 10.926 | 11.848 | 20.695 | 9.343  |
| 17 | 0.4877 | 19.871 | 11.799 | 14.435 | 14.176 | 14.646 |
| 17 | 0.4887 | 16.823 | 9.472  | 11.975 | 15.241 | 7.388  |
| 17 | 0.4897 | 14.019 | 6.496  | 14.663 | 18.141 | 7.057  |
| 17 | 0.4907 | 23.191 | 6.199  | 18.764 | 25.522 | 9.304  |
| 17 | 0.4917 | 23.106 | 6.211  | 18.632 | 25.453 | 9.244  |
| 17 | 0.4927 | 21.966 | 5.802  | 17.976 | 15.102 | 12.725 |
| 17 | 0.4937 | 22.846 | 7.313  | 14.559 | 17.166 | 7.980  |
| 17 | 0.4947 | 10.665 | 7.530  | 5.472  | 7.568  | 7.707  |
| 17 | 0.4957 | 16.614 | 12.852 | 11.062 | 12.610 | 8.067  |
| 17 | 0.4967 | 20.913 | 10.937 | 14.637 | 15.529 | 23.931 |
| 17 | 0.4977 | 15.163 | 7.732  | 7.418  | 19.357 | 12.750 |
| 17 | 0.4987 | 14.940 | 8.403  | 10.031 | 10.478 | 16.091 |
| 17 | 0.4997 | 22.938 | 16.259 | 18.792 | 10.289 | 13.278 |
| 17 | 0.5007 | 24.863 | 13.502 | 21.446 | 13.169 | 17.598 |
| 17 | 0.5017 | 16.547 | 12.427 | 11.759 | 10.544 | 18.641 |
| 17 | 0.5027 | 16.143 | 20.185 | 13.325 | 20.783 | 12.913 |
| 17 | 0.5037 | 20.610 | 10.569 | 13.018 | 5.785  | 12.500 |
| 17 | 0.5047 | 22.795 | 17.408 | 17.365 | 18.055 | 16.823 |
| 17 | 0.5057 | 22.803 | 17.351 | 17.367 | 18.033 | 16.801 |
| 17 | 0.5067 | 23.458 | 12.266 | 16.704 | 10.991 | 13.804 |
| 17 | 0.5077 | 20.479 | 14.958 | 14.168 | 11.039 | 8.041  |
| 17 | 0.5087 | 20.891 | 14.280 | 14.546 | 14.952 | 14.475 |
| 17 | 0.5097 | 21.807 | 11.534 | 8.385  | 11.924 | 6.968  |
| 17 | 0.5107 | 25.454 | 14.585 | 16.095 | 20.642 | 27.264 |
| 17 | 0.5117 | 14.191 | 5.512  | 8.389  | 10.875 | 12.770 |
| 17 | 0.5127 | 9.124  | 6.897  | 9.530  | 8.527  | 8.882  |
| 17 | 0.5137 | 7.178  | 3.694  | 5.467  | 6.071  | 16.931 |
| 17 | 0.5147 | 19.325 | 12.357 | 16.005 | 13.938 | 15.831 |
| 17 | 0.5157 | 24.161 | 9.065  | 10.464 | 13.973 | 28.287 |
| 17 | 0.5167 | 10.632 | 3.126  | 3.845  | 16.111 | 17.681 |
| 17 | 0.5177 | 21.798 | 8.931  | 15.192 | 14.989 | 11.325 |
| 17 | 0.5187 | 14.703 | 6.332  | 8.883  | 8.572  | 13.755 |
| 17 | 0.5197 | 13.222 | 5.545  | 8.467  | 9.446  | 12.977 |
| 17 | 0.5207 | 13.618 | 13.300 | 11.845 | 12.773 | 10.376 |

|    |        |        |        |        |        |        |
|----|--------|--------|--------|--------|--------|--------|
| 17 | 0.5217 | 9.502  | 9.500  | 10.514 | 12.223 | 13.388 |
| 17 | 0.5227 | 10.096 | 9.252  | 8.903  | 14.533 | 17.219 |
| 17 | 0.5237 | 10.578 | 8.817  | 8.061  | 12.929 | 15.689 |
| 17 | 0.5247 | 13.977 | 8.772  | 8.047  | 11.271 | 16.163 |
| 17 | 0.5257 | 15.060 | 4.725  | 7.279  | 9.870  | 16.725 |
| 17 | 0.5267 | 17.115 | 9.573  | 6.975  | 5.538  | 11.523 |
| 17 | 0.5277 | 18.266 | 9.394  | 6.378  | 7.348  | 7.707  |
| 17 | 0.5287 | 17.780 | 13.605 | 12.518 | 17.871 | 16.295 |
| 17 | 0.5297 | 21.843 | 21.005 | 15.477 | 16.540 | 18.715 |
| 17 | 0.5307 | 21.864 | 21.013 | 15.510 | 16.526 | 18.710 |
| 17 | 0.5317 | 17.255 | 19.034 | 9.681  | 24.527 | 14.091 |
| 17 | 0.5327 | 12.979 | 11.569 | 10.770 | 17.247 | 16.098 |
| 17 | 0.5337 | 25.015 | 16.354 | 16.244 | 20.849 | 13.082 |
| 17 | 0.5347 | 25.989 | 16.090 | 13.945 | 17.659 | 11.734 |
| 17 | 0.5357 | 24.193 | 18.162 | 14.553 | 8.735  | 10.610 |
| 17 | 0.5367 | 23.932 | 18.023 | 14.478 | 8.707  | 10.540 |
| 17 | 0.5377 | 12.997 | 9.733  | 8.623  | 6.528  | 11.941 |
| 17 | 0.5387 | 13.049 | 9.809  | 8.664  | 6.425  | 11.930 |
| 17 | 0.5397 | 9.702  | 7.844  | 8.178  | 8.740  | 12.682 |
| 17 | 0.5407 | 23.893 | 14.578 | 18.826 | 6.297  | 18.422 |
| 17 | 0.5417 | 20.657 | 13.289 | 13.299 | 12.626 | 19.194 |
| 17 | 0.5427 | 15.326 | 9.276  | 8.493  | 11.503 | 17.204 |
| 17 | 0.5437 | 7.294  | 7.304  | 6.889  | 14.087 | 23.928 |
| 17 | 0.5447 | 37.547 | 15.156 | 13.680 | 18.659 | 22.440 |
| 17 | 0.5457 | 21.259 | 11.604 | 14.668 | 7.339  | 18.881 |
| 17 | 0.5467 | 22.111 | 10.498 | 11.869 | 11.325 | 14.337 |
| 17 | 0.5477 | 6.251  | 3.516  | 2.429  | 9.054  | 6.359  |
| 17 | 0.5487 | 9.159  | 3.067  | 2.965  | 8.615  | 9.085  |
| 17 | 0.5497 | 8.311  | 3.318  | 2.523  | 10.413 | 8.674  |
| 17 | 0.5507 | 15.738 | 11.426 | 9.421  | 6.012  | 9.597  |
| 17 | 0.5517 | 15.236 | 11.521 | 13.048 | 6.957  | 5.633  |
| 17 | 0.5527 | 26.591 | 18.349 | 23.734 | 6.281  | 8.565  |
| 17 | 0.5537 | 36.212 | 20.810 | 28.885 | 19.086 | 11.633 |
| 17 | 0.5547 | 21.522 | 14.885 | 19.276 | 13.715 | 17.725 |
| 17 | 0.5557 | 21.379 | 14.758 | 17.668 | 16.666 | 15.631 |
| 17 | 0.5567 | 11.806 | 9.238  | 8.882  | 15.249 | 9.511  |
| 17 | 0.5577 | 18.752 | 9.379  | 13.608 | 10.501 | 15.544 |
| 17 | 0.5587 | 21.439 | 14.385 | 16.823 | 9.323  | 13.575 |
| 17 | 0.5597 | 24.270 | 13.282 | 14.993 | 15.939 | 19.619 |
| 17 | 0.5607 | 22.209 | 12.730 | 13.283 | 18.281 | 12.568 |
| 17 | 0.5617 | 16.847 | 17.843 | 17.612 | 23.783 | 12.286 |
| 17 | 0.5627 | 16.848 | 17.816 | 17.604 | 23.680 | 12.225 |
| 17 | 0.5637 | 21.029 | 25.276 | 13.436 | 18.272 | 13.852 |
| 17 | 0.5647 | 5.019  | 4.621  | 2.107  | 4.506  | 0.782  |
| 17 | 0.5657 | 14.724 | 6.196  | 6.772  | 11.336 | 9.938  |
| 17 | 0.5667 | 14.711 | 6.151  | 6.777  | 11.252 | 9.871  |
| 17 | 0.5677 | 14.699 | 6.107  | 6.783  | 11.170 | 9.810  |
| 17 | 0.5687 | 9.152  | 5.595  | 5.405  | 19.867 | 11.588 |
| 17 | 0.5697 | 17.329 | 8.317  | 11.151 | 17.187 | 11.213 |
| 17 | 0.5707 | 21.410 | 6.589  | 14.155 | 14.022 | 10.534 |



|    |        |        |        |        |        |        |
|----|--------|--------|--------|--------|--------|--------|
| 17 | 0.5717 | 19.666 | 15.866 | 14.604 | 12.831 | 12.038 |
| 17 | 0.5727 | 19.922 | 19.242 | 20.323 | 14.016 | 2.971  |
| 17 | 0.5737 | 32.315 | 12.446 | 18.372 | 10.650 | 12.627 |
| 17 | 0.5747 | 20.249 | 13.384 | 10.422 | 12.461 | 13.881 |
| 17 | 0.5757 | 12.914 | 12.137 | 6.977  | 18.299 | 9.710  |
| 17 | 0.5767 | 16.596 | 13.999 | 8.728  | 16.181 | 14.040 |
| 17 | 0.5777 | 8.453  | 2.988  | 4.316  | 11.626 | 9.751  |
| 17 | 0.5787 | 9.319  | 4.719  | 6.530  | 16.009 | 10.728 |
| 17 | 0.5797 | 14.638 | 10.388 | 12.116 | 10.851 | 14.363 |
| 17 | 0.5807 | 21.623 | 11.189 | 15.030 | 9.943  | 25.937 |
| 17 | 0.5817 | 18.530 | 17.606 | 18.275 | 11.921 | 13.175 |
| 17 | 0.5827 | 17.558 | 16.988 | 13.339 | 10.352 | 10.158 |
| 17 | 0.5837 | 20.538 | 16.146 | 11.869 | 5.795  | 9.217  |
| 17 | 0.5847 | 15.087 | 11.707 | 14.108 | 12.038 | 12.008 |
| 17 | 0.5857 | 12.027 | 15.840 | 12.379 | 18.350 | 13.910 |
| 17 | 0.5867 | 12.822 | 4.255  | 5.035  | 8.293  | 16.539 |
| 17 | 0.5877 | 16.723 | 8.738  | 10.443 | 15.256 | 12.148 |
| 17 | 0.5887 | 19.887 | 11.038 | 11.155 | 11.001 | 10.379 |
| 17 | 0.5897 | 12.847 | 11.126 | 9.356  | 11.037 | 12.288 |
| 17 | 0.5907 | 16.660 | 5.947  | 7.273  | 14.998 | 20.307 |
| 17 | 0.5917 | 22.078 | 16.785 | 14.230 | 8.964  | 16.682 |
| 17 | 0.5927 | 12.620 | 11.998 | 9.378  | 11.474 | 12.017 |
| 17 | 0.5937 | 22.147 | 20.364 | 18.655 | 13.414 | 12.472 |
| 17 | 0.5947 | 19.265 | 8.690  | 5.611  | 14.226 | 13.962 |
| 17 | 0.5957 | 14.097 | 9.059  | 5.546  | 23.339 | 17.328 |
| 17 | 0.5967 | 13.088 | 19.008 | 10.028 | 23.888 | 13.008 |
| 17 | 0.5977 | 12.399 | 15.356 | 15.636 | 14.563 | 12.909 |
| 17 | 0.5987 | 6.567  | 13.362 | 14.848 | 6.459  | 7.498  |
| 17 | 0.5997 | 4.028  | 7.359  | 5.962  | 14.809 | 7.366  |
| 17 | 0.6007 | 8.454  | 9.977  | 8.659  | 13.148 | 11.337 |
| 17 | 0.6017 | 7.219  | 8.483  | 7.837  | 10.154 | 3.750  |
| 17 | 0.6027 | 14.465 | 18.237 | 22.458 | 11.528 | 15.598 |
| 17 | 0.6037 | 8.625  | 5.155  | 9.675  | 13.088 | 12.739 |
| 17 | 0.6047 | 10.879 | 11.560 | 10.315 | 18.926 | 9.953  |
| 17 | 0.6057 | 8.921  | 8.328  | 8.304  | 16.287 | 11.206 |
| 17 | 0.6067 | 8.374  | 12.283 | 10.115 | 15.063 | 13.894 |
| 17 | 0.6077 | 13.061 | 17.679 | 16.413 | 14.583 | 15.371 |
| 17 | 0.6087 | 18.436 | 23.972 | 24.762 | 11.922 | 23.549 |
| 17 | 0.6097 | 5.577  | 7.067  | 10.096 | 5.506  | 17.081 |
| 17 | 0.6107 | 6.978  | 2.569  | 7.619  | 10.343 | 15.670 |
| 17 | 0.6117 | 8.019  | 6.967  | 10.940 | 14.009 | 14.778 |
| 17 | 0.6127 | 5.310  | 4.229  | 7.087  | 12.939 | 15.286 |
| 17 | 0.6137 | 7.664  | 21.694 | 12.631 | 13.787 | 16.945 |
| 17 | 0.6147 | 6.789  | 9.427  | 5.425  | 4.356  | 8.899  |
| 17 | 0.6157 | 12.140 | 14.791 | 9.403  | 5.379  | 6.532  |
| 17 | 0.6167 | 3.648  | 4.047  | 6.796  | 3.656  | 5.585  |
| 17 | 0.6177 | 3.543  | 9.771  | 8.694  | 9.044  | 15.547 |
| 17 | 0.6187 | 3.287  | 6.942  | 10.422 | 4.308  | 16.101 |
| 17 | 0.6197 | 6.797  | 7.458  | 10.016 | 12.656 | 20.868 |
| 17 | 0.6207 | 8.081  | 16.859 | 12.606 | 15.789 | 10.142 |

|    |        |        |        |        |        |        |
|----|--------|--------|--------|--------|--------|--------|
| 17 | 0.6217 | 13.885 | 21.225 | 14.990 | 16.164 | 12.624 |
| 17 | 0.6227 | 13.238 | 20.318 | 19.131 | 18.473 | 17.184 |
| 17 | 0.6237 | 19.374 | 24.696 | 24.631 | 9.858  | 13.755 |
| 17 | 0.6247 | 25.027 | 31.845 | 32.907 | 14.804 | 26.184 |
| 17 | 0.6257 | 10.474 | 12.679 | 19.840 | 13.397 | 15.155 |
| 17 | 0.6267 | 9.787  | 10.408 | 11.889 | 9.549  | 12.585 |
| 17 | 0.6277 | 7.955  | 10.130 | 6.695  | 10.746 | 8.311  |
| 17 | 0.6287 | 4.687  | 5.258  | 7.033  | 15.769 | 18.899 |
| 17 | 0.6297 | 16.515 | 14.275 | 12.837 | 12.178 | 9.595  |
| 17 | 0.6307 | 7.538  | 8.148  | 9.355  | 8.803  | 4.763  |
| 17 | 0.6317 | 4.806  | 6.187  | 6.108  | 11.422 | 7.298  |
| 17 | 0.6327 | 1.349  | 5.900  | 6.000  | 9.425  | 6.990  |
| 17 | 0.6337 | 7.287  | 7.852  | 14.210 | 15.701 | 12.762 |
| 17 | 0.6347 | 11.457 | 11.052 | 13.127 | 10.417 | 6.981  |
| 17 | 0.6357 | 6.838  | 11.921 | 10.363 | 15.479 | 14.660 |
| 17 | 0.6367 | 10.747 | 6.804  | 8.056  | 19.403 | 11.544 |
| 17 | 0.6377 | 12.399 | 13.384 | 7.045  | 22.994 | 24.132 |
| 17 | 0.6387 | 8.682  | 5.694  | 6.404  | 27.550 | 19.831 |
| 17 | 0.6397 | 9.684  | 11.987 | 17.082 | 11.480 | 21.555 |
| 17 | 0.6407 | 11.539 | 14.222 | 18.794 | 19.894 | 19.059 |
| 17 | 0.6417 | 5.904  | 11.599 | 8.072  | 19.227 | 9.783  |
| 17 | 0.6427 | 16.189 | 19.559 | 18.242 | 20.406 | 19.799 |
| 17 | 0.6437 | 8.872  | 13.806 | 16.856 | 14.770 | 23.122 |
| 17 | 0.6447 | 8.555  | 5.823  | 4.385  | 15.178 | 12.782 |
| 17 | 0.6457 | 5.954  | 7.428  | 3.292  | 14.571 | 8.142  |
| 17 | 0.6467 | 21.232 | 9.735  | 12.944 | 14.418 | 25.560 |
| 17 | 0.6477 | 15.510 | 15.633 | 16.415 | 14.301 | 19.358 |
| 17 | 0.6487 | 16.305 | 15.774 | 16.602 | 14.374 | 19.319 |
| 17 | 0.6497 | 17.768 | 9.963  | 13.421 | 8.795  | 4.639  |
| 17 | 0.6507 | 13.111 | 10.463 | 12.037 | 9.782  | 18.198 |
| 17 | 0.6517 | 15.314 | 12.976 | 11.029 | 7.346  | 20.319 |
| 17 | 0.6527 | 12.550 | 10.503 | 8.614  | 7.422  | 16.190 |
| 17 | 0.6537 | 6.319  | 3.474  | 4.301  | 5.213  | 5.926  |
| 17 | 0.6547 | 16.081 | 16.994 | 12.691 | 12.484 | 8.366  |
| 17 | 0.6557 | 11.039 | 8.924  | 9.102  | 8.949  | 23.715 |
| 17 | 0.6567 | 10.973 | 13.712 | 10.940 | 14.851 | 14.550 |
| 17 | 0.6577 | 15.777 | 19.561 | 22.428 | 16.006 | 18.631 |
| 17 | 0.6587 | 13.270 | 15.573 | 17.584 | 17.151 | 19.387 |
| 17 | 0.6597 | 17.828 | 14.231 | 17.210 | 13.814 | 13.570 |
| 17 | 0.6607 | 8.863  | 13.914 | 8.623  | 19.809 | 22.827 |
| 17 | 0.6617 | 15.531 | 16.449 | 20.495 | 34.602 | 27.058 |
| 17 | 0.6627 | 14.905 | 15.393 | 21.076 | 14.850 | 21.316 |
| 17 | 0.6637 | 10.581 | 9.937  | 10.716 | 12.237 | 11.036 |
| 17 | 0.6647 | 9.705  | 9.172  | 10.561 | 7.237  | 9.108  |
| 17 | 0.6657 | 7.992  | 9.296  | 8.560  | 15.466 | 14.491 |
| 17 | 0.6667 | 15.636 | 15.125 | 11.049 | 20.216 | 16.113 |
| 17 | 0.6677 | 15.848 | 18.061 | 13.680 | 20.186 | 13.972 |
| 17 | 0.6687 | 8.408  | 6.533  | 9.260  | 18.294 | 16.086 |
| 17 | 0.6697 | 16.286 | 17.877 | 16.642 | 17.237 | 12.740 |
| 17 | 0.6707 | 5.863  | 4.296  | 6.127  | 6.833  | 9.749  |

|    |        |        |        |        |        |        |
|----|--------|--------|--------|--------|--------|--------|
| 17 | 0.6717 | 11.394 | 7.004  | 9.088  | 14.075 | 10.086 |
| 17 | 0.6727 | 14.302 | 8.342  | 9.718  | 12.657 | 10.664 |
| 17 | 0.6737 | 22.557 | 16.404 | 21.631 | 10.437 | 8.841  |
| 17 | 0.6747 | 16.029 | 13.876 | 14.417 | 7.900  | 6.544  |
| 17 | 0.6757 | 21.129 | 18.297 | 26.071 | 2.483  | 5.282  |
| 17 | 0.6767 | 3.481  | 2.145  | 1.283  | 5.370  | 16.045 |
| 17 | 0.6777 | 12.760 | 9.357  | 13.389 | 14.530 | 16.964 |
| 17 | 0.6787 | 11.272 | 11.399 | 16.084 | 14.902 | 12.473 |
| 17 | 0.6797 | 13.050 | 10.678 | 19.557 | 7.708  | 7.894  |
| 17 | 0.6807 | 10.644 | 7.180  | 12.455 | 6.492  | 4.851  |
| 17 | 0.6817 | 6.952  | 5.708  | 8.167  | 3.079  | 10.086 |
| 17 | 0.6827 | 10.482 | 8.258  | 8.896  | 7.279  | 10.518 |
| 17 | 0.6837 | 11.811 | 10.930 | 9.410  | 16.330 | 19.640 |
| 17 | 0.6847 | 15.665 | 13.094 | 12.571 | 14.231 | 14.109 |
| 17 | 0.6857 | 8.913  | 10.364 | 9.215  | 10.796 | 11.579 |
| 17 | 0.6867 | 21.010 | 18.818 | 23.910 | 10.309 | 12.378 |
| 17 | 0.6877 | 9.660  | 15.579 | 13.374 | 11.478 | 13.511 |
| 17 | 0.6887 | 7.942  | 8.288  | 10.861 | 5.493  | 7.422  |
| 17 | 0.6897 | 15.909 | 11.890 | 19.773 | 7.885  | 9.397  |
| 17 | 0.6907 | 15.049 | 10.804 | 15.504 | 11.202 | 7.918  |
| 17 | 0.6917 | 10.525 | 11.276 | 10.088 | 17.799 | 20.448 |
| 17 | 0.6927 | 12.265 | 9.908  | 10.598 | 10.095 | 14.916 |
| 17 | 0.6937 | 18.012 | 12.359 | 21.535 | 6.579  | 10.060 |
| 17 | 0.6947 | 18.203 | 12.404 | 21.695 | 6.576  | 10.050 |
| 17 | 0.6957 | 8.962  | 7.585  | 8.779  | 8.319  | 14.865 |
| 17 | 0.6967 | 12.882 | 13.033 | 19.351 | 5.635  | 9.805  |
| 17 | 0.6977 | 18.092 | 10.093 | 15.796 | 10.884 | 7.645  |
| 17 | 0.6987 | 22.196 | 18.106 | 29.349 | 7.985  | 7.821  |
| 17 | 0.6997 | 21.598 | 18.715 | 25.467 | 6.468  | 7.623  |
| 17 | 0.7007 | 22.150 | 20.468 | 30.572 | 4.348  | 10.643 |
| 17 | 0.7017 | 21.883 | 20.418 | 30.368 | 4.361  | 10.514 |
| 17 | 0.7027 | 13.723 | 14.862 | 19.060 | 8.235  | 15.601 |
| 17 | 0.7037 | 7.113  | 6.755  | 10.648 | 15.112 | 19.550 |
| 17 | 0.7047 | 6.334  | 7.020  | 8.772  | 9.718  | 9.775  |
| 17 | 0.7057 | 6.282  | 6.848  | 8.674  | 9.581  | 9.745  |
| 17 | 0.7067 | 27.202 | 22.210 | 21.753 | 11.652 | 20.972 |
| 17 | 0.7077 | 13.178 | 10.132 | 8.876  | 11.339 | 13.912 |
| 17 | 0.7087 | 8.179  | 8.592  | 7.205  | 10.667 | 12.290 |
| 17 | 0.7097 | 10.502 | 9.709  | 9.828  | 14.230 | 11.503 |
| 17 | 0.7107 | 9.383  | 8.293  | 8.419  | 2.662  | 9.216  |
| 17 | 0.7117 | 6.277  | 4.537  | 6.748  | 2.239  | 4.047  |
| 17 | 0.7127 | 12.052 | 12.190 | 12.072 | 13.631 | 9.759  |
| 17 | 0.7137 | 20.277 | 11.546 | 16.669 | 13.225 | 11.856 |
| 17 | 0.7147 | 8.665  | 7.746  | 7.712  | 16.239 | 12.884 |
| 17 | 0.7157 | 9.388  | 10.298 | 10.964 | 8.379  | 8.932  |
| 17 | 0.7167 | 6.710  | 6.681  | 8.537  | 11.913 | 6.900  |
| 17 | 0.7177 | 0.151  | 0.682  | 0.307  | 0.760  | 0.119  |
| 17 | 0.7187 | 3.893  | 3.070  | 3.237  | 0.210  | 1.237  |
| 18 | 0.0014 | 0.000  | 0.000  | 0.000  | 0.000  | 0.000  |
| 18 | 0.0024 | 12.256 | 12.629 | 16.951 | 11.541 | 18.625 |

|    |        |        |        |        |        |        |
|----|--------|--------|--------|--------|--------|--------|
| 18 | 0.0034 | 9.889  | 11.227 | 7.948  | 8.429  | 11.977 |
| 18 | 0.0044 | 12.548 | 14.125 | 21.877 | 12.331 | 19.678 |
| 18 | 0.0054 | 14.314 | 25.212 | 22.052 | 14.753 | 26.375 |
| 18 | 0.0064 | 5.018  | 9.759  | 7.906  | 17.587 | 17.122 |
| 18 | 0.0074 | 8.113  | 4.750  | 6.487  | 19.299 | 16.069 |
| 18 | 0.0084 | 22.966 | 29.678 | 23.308 | 24.174 | 9.480  |
| 18 | 0.0094 | 20.132 | 27.955 | 24.569 | 19.139 | 15.853 |
| 18 | 0.0104 | 11.813 | 18.279 | 18.471 | 15.502 | 17.499 |
| 18 | 0.0114 | 9.771  | 14.722 | 14.207 | 11.309 | 11.921 |
| 18 | 0.0124 | 12.217 | 12.426 | 12.426 | 17.890 | 12.649 |
| 18 | 0.0134 | 9.133  | 17.800 | 12.312 | 26.019 | 18.517 |
| 18 | 0.0144 | 6.365  | 7.328  | 6.060  | 8.696  | 12.243 |
| 18 | 0.0154 | 12.365 | 16.908 | 17.559 | 25.606 | 28.502 |
| 18 | 0.0164 | 9.724  | 13.272 | 18.385 | 19.259 | 19.686 |
| 18 | 0.0174 | 10.665 | 15.076 | 17.175 | 22.160 | 25.928 |
| 18 | 0.0184 | 15.487 | 13.877 | 19.457 | 15.263 | 18.459 |
| 18 | 0.0194 | 7.899  | 14.170 | 15.371 | 9.340  | 12.271 |
| 18 | 0.0204 | 10.747 | 11.267 | 9.650  | 13.802 | 13.784 |
| 18 | 0.0214 | 11.593 | 16.020 | 12.937 | 18.559 | 13.632 |
| 18 | 0.0224 | 9.356  | 11.622 | 10.634 | 11.278 | 7.246  |
| 18 | 0.0234 | 6.641  | 3.337  | 6.919  | 2.923  | 6.902  |
| 18 | 0.0244 | 3.538  | 2.170  | 6.885  | 6.419  | 6.675  |
| 18 | 0.0254 | 4.974  | 9.316  | 13.505 | 8.737  | 5.452  |
| 18 | 0.0264 | 8.931  | 13.813 | 16.345 | 9.423  | 9.704  |
| 18 | 0.0274 | 7.221  | 4.740  | 9.517  | 19.399 | 12.897 |
| 18 | 0.0284 | 13.926 | 28.567 | 30.288 | 12.812 | 16.275 |
| 18 | 0.0294 | 9.814  | 18.769 | 19.055 | 17.746 | 22.621 |
| 18 | 0.0304 | 12.818 | 18.516 | 18.286 | 14.323 | 23.067 |
| 18 | 0.0314 | 4.530  | 10.736 | 7.986  | 13.675 | 13.436 |
| 18 | 0.0324 | 9.376  | 13.230 | 14.533 | 18.609 | 12.395 |
| 18 | 0.0334 | 11.747 | 18.004 | 18.469 | 19.942 | 17.520 |
| 18 | 0.0344 | 11.583 | 16.523 | 16.510 | 17.971 | 11.635 |
| 18 | 0.0354 | 6.162  | 13.740 | 11.552 | 12.246 | 9.469  |
| 18 | 0.0364 | 6.213  | 13.752 | 11.652 | 12.266 | 9.474  |
| 18 | 0.0374 | 6.840  | 15.802 | 13.258 | 20.849 | 16.126 |
| 18 | 0.0384 | 8.971  | 18.687 | 13.373 | 17.000 | 11.657 |
| 18 | 0.0394 | 13.828 | 24.461 | 23.504 | 19.480 | 20.852 |
| 18 | 0.0404 | 18.477 | 25.741 | 23.394 | 24.655 | 14.932 |
| 18 | 0.0414 | 16.128 | 17.843 | 20.437 | 15.920 | 24.382 |
| 18 | 0.0424 | 17.127 | 17.383 | 25.596 | 16.620 | 20.211 |
| 18 | 0.0434 | 7.704  | 11.482 | 19.542 | 7.709  | 10.097 |
| 18 | 0.0444 | 13.198 | 27.020 | 18.377 | 24.387 | 22.101 |
| 18 | 0.0454 | 15.028 | 24.101 | 23.068 | 26.677 | 11.084 |
| 18 | 0.0464 | 15.160 | 26.449 | 25.273 | 33.566 | 11.409 |
| 18 | 0.0474 | 7.870  | 8.083  | 11.147 | 37.892 | 11.272 |
| 18 | 0.0484 | 8.956  | 6.246  | 11.235 | 35.064 | 12.688 |
| 18 | 0.0494 | 11.031 | 17.981 | 17.065 | 19.501 | 20.652 |
| 18 | 0.0504 | 8.750  | 20.058 | 18.430 | 15.634 | 13.001 |
| 18 | 0.0514 | 3.749  | 11.957 | 7.680  | 16.988 | 6.507  |
| 18 | 0.0524 | 7.202  | 11.784 | 5.974  | 19.601 | 9.298  |

|    |        |        |        |        |        |        |
|----|--------|--------|--------|--------|--------|--------|
| 18 | 0.0534 | 6.984  | 11.635 | 5.822  | 19.491 | 9.200  |
| 18 | 0.0544 | 15.665 | 17.346 | 18.878 | 19.827 | 9.216  |
| 18 | 0.0554 | 10.527 | 17.156 | 19.546 | 16.712 | 18.366 |
| 18 | 0.0564 | 6.248  | 9.912  | 13.924 | 8.307  | 9.606  |
| 18 | 0.0574 | 9.191  | 12.732 | 13.178 | 6.474  | 13.425 |
| 18 | 0.0584 | 6.210  | 16.812 | 11.608 | 12.373 | 16.296 |
| 18 | 0.0594 | 6.503  | 10.156 | 13.073 | 12.353 | 12.447 |
| 18 | 0.0604 | 20.179 | 31.262 | 27.330 | 18.542 | 10.685 |
| 18 | 0.0614 | 14.656 | 17.552 | 19.379 | 12.562 | 19.222 |
| 18 | 0.0624 | 14.675 | 12.315 | 17.875 | 8.703  | 10.995 |
| 18 | 0.0634 | 18.245 | 20.543 | 18.604 | 10.529 | 10.197 |
| 18 | 0.0644 | 9.930  | 13.485 | 9.401  | 16.773 | 11.084 |
| 18 | 0.0654 | 7.446  | 14.066 | 11.478 | 10.848 | 4.064  |
| 18 | 0.0664 | 7.666  | 9.377  | 9.631  | 10.911 | 5.749  |
| 18 | 0.0674 | 12.671 | 21.569 | 13.680 | 10.590 | 9.993  |
| 18 | 0.0684 | 10.095 | 18.048 | 13.684 | 13.315 | 6.634  |
| 18 | 0.0694 | 15.229 | 20.754 | 18.540 | 9.877  | 12.062 |
| 18 | 0.0704 | 8.313  | 7.675  | 8.352  | 6.259  | 10.077 |
| 18 | 0.0714 | 15.126 | 19.604 | 17.434 | 15.975 | 13.850 |
| 18 | 0.0724 | 22.764 | 22.002 | 18.783 | 13.307 | 18.599 |
| 18 | 0.0734 | 19.230 | 22.556 | 16.594 | 21.413 | 30.154 |
| 18 | 0.0744 | 9.535  | 11.793 | 10.803 | 8.044  | 3.801  |
| 18 | 0.0754 | 11.240 | 15.541 | 12.977 | 13.386 | 7.562  |
| 18 | 0.0764 | 15.547 | 22.486 | 21.358 | 9.729  | 7.962  |
| 18 | 0.0774 | 14.309 | 19.332 | 21.697 | 10.897 | 13.064 |
| 18 | 0.0784 | 3.428  | 3.774  | 2.541  | 5.691  | 9.081  |
| 18 | 0.0794 | 6.851  | 5.752  | 6.377  | 2.717  | 4.081  |
| 18 | 0.0804 | 12.929 | 9.504  | 19.179 | 7.562  | 12.321 |
| 18 | 0.0814 | 17.738 | 21.192 | 21.770 | 10.685 | 21.193 |
| 18 | 0.0824 | 15.674 | 20.290 | 17.277 | 13.333 | 30.573 |
| 18 | 0.0834 | 9.929  | 19.894 | 25.204 | 18.986 | 20.099 |
| 18 | 0.0844 | 16.567 | 19.876 | 24.563 | 14.627 | 11.957 |
| 18 | 0.0854 | 13.646 | 22.789 | 20.452 | 20.009 | 5.616  |
| 18 | 0.0864 | 13.934 | 12.495 | 9.020  | 8.171  | 5.643  |
| 18 | 0.0874 | 11.928 | 19.533 | 18.099 | 11.844 | 14.924 |
| 18 | 0.0884 | 11.461 | 16.885 | 17.525 | 11.542 | 14.099 |
| 18 | 0.0894 | 11.889 | 16.598 | 17.766 | 11.454 | 15.371 |
| 18 | 0.0904 | 8.967  | 10.587 | 14.726 | 12.657 | 13.704 |
| 18 | 0.0914 | 11.276 | 8.931  | 10.407 | 18.123 | 19.542 |
| 18 | 0.0924 | 11.246 | 15.002 | 15.288 | 21.853 | 19.231 |
| 18 | 0.0934 | 11.425 | 15.942 | 17.690 | 24.760 | 18.620 |
| 18 | 0.0944 | 7.799  | 7.580  | 12.937 | 19.242 | 17.522 |
| 18 | 0.0954 | 6.410  | 5.367  | 6.850  | 6.376  | 19.566 |
| 18 | 0.0964 | 12.625 | 21.515 | 19.718 | 10.428 | 13.778 |
| 18 | 0.0974 | 11.641 | 16.727 | 14.390 | 12.778 | 13.680 |
| 18 | 0.0984 | 11.751 | 4.079  | 11.517 | 8.235  | 11.229 |
| 18 | 0.0994 | 13.082 | 17.723 | 15.876 | 15.528 | 23.390 |
| 18 | 0.1004 | 9.343  | 5.669  | 7.637  | 20.140 | 28.622 |
| 18 | 0.1014 | 9.677  | 9.497  | 8.669  | 11.746 | 26.364 |
| 18 | 0.1024 | 12.132 | 20.199 | 18.329 | 27.832 | 34.382 |

|    |        |        |        |        |        |        |
|----|--------|--------|--------|--------|--------|--------|
| 18 | 0.1034 | 4.051  | 11.872 | 7.624  | 21.659 | 27.751 |
| 18 | 0.1044 | 5.010  | 5.147  | 2.549  | 8.746  | 20.576 |
| 18 | 0.1054 | 7.654  | 6.540  | 8.122  | 13.398 | 26.724 |
| 18 | 0.1064 | 6.684  | 7.451  | 5.870  | 5.360  | 18.889 |
| 18 | 0.1074 | 6.544  | 4.536  | 4.111  | 8.055  | 15.615 |
| 18 | 0.1084 | 11.468 | 7.070  | 8.342  | 16.235 | 22.486 |
| 18 | 0.1094 | 8.159  | 11.281 | 10.935 | 20.438 | 23.634 |
| 18 | 0.1104 | 13.637 | 19.241 | 16.274 | 23.999 | 21.023 |
| 18 | 0.1114 | 15.708 | 14.324 | 17.158 | 25.203 | 12.181 |
| 18 | 0.1124 | 23.669 | 12.661 | 25.981 | 18.057 | 16.962 |
| 18 | 0.1134 | 8.753  | 11.837 | 16.077 | 22.719 | 20.482 |
| 18 | 0.1144 | 12.148 | 8.928  | 14.900 | 9.225  | 14.440 |
| 18 | 0.1154 | 23.487 | 26.112 | 24.966 | 18.240 | 13.729 |
| 18 | 0.1164 | 23.562 | 26.126 | 24.988 | 18.260 | 13.731 |
| 18 | 0.1174 | 18.514 | 29.071 | 20.939 | 13.288 | 11.652 |
| 18 | 0.1184 | 18.579 | 29.278 | 20.942 | 13.370 | 11.652 |
| 18 | 0.1194 | 13.663 | 14.196 | 16.330 | 21.865 | 8.694  |
| 18 | 0.1204 | 11.104 | 8.444  | 8.090  | 15.225 | 8.796  |
| 18 | 0.1214 | 13.058 | 11.328 | 19.770 | 10.613 | 9.518  |
| 18 | 0.1224 | 8.901  | 8.128  | 9.475  | 12.079 | 13.126 |
| 18 | 0.1234 | 25.648 | 9.919  | 21.904 | 15.725 | 13.422 |
| 18 | 0.1244 | 21.044 | 10.672 | 18.634 | 15.986 | 18.579 |
| 18 | 0.1254 | 13.340 | 11.239 | 15.331 | 9.074  | 10.544 |
| 18 | 0.1264 | 15.704 | 18.520 | 16.828 | 12.473 | 15.058 |
| 18 | 0.1274 | 20.447 | 16.019 | 17.384 | 10.944 | 7.352  |
| 18 | 0.1284 | 7.526  | 7.370  | 10.122 | 14.013 | 22.813 |
| 18 | 0.1294 | 7.598  | 3.939  | 5.831  | 11.192 | 11.354 |
| 18 | 0.1304 | 18.155 | 15.649 | 15.758 | 15.001 | 17.375 |
| 18 | 0.1314 | 9.472  | 13.826 | 10.861 | 9.637  | 13.418 |
| 18 | 0.1324 | 17.106 | 18.070 | 19.136 | 10.683 | 18.119 |
| 18 | 0.1334 | 18.891 | 19.087 | 23.692 | 5.020  | 8.785  |
| 18 | 0.1344 | 12.910 | 7.425  | 13.826 | 8.402  | 11.143 |
| 18 | 0.1354 | 12.837 | 6.697  | 16.197 | 16.980 | 13.928 |
| 18 | 0.1364 | 13.550 | 11.856 | 17.164 | 14.945 | 13.667 |
| 18 | 0.1374 | 7.668  | 3.694  | 9.326  | 5.978  | 8.749  |
| 18 | 0.1384 | 20.148 | 4.784  | 17.422 | 5.977  | 0.750  |
| 18 | 0.1394 | 16.390 | 4.229  | 15.132 | 8.988  | 10.913 |
| 18 | 0.1404 | 11.031 | 17.739 | 14.896 | 8.804  | 13.211 |
| 18 | 0.1414 | 13.427 | 16.711 | 18.156 | 14.576 | 7.614  |
| 18 | 0.1424 | 6.824  | 6.508  | 8.946  | 4.891  | 4.013  |
| 18 | 0.1434 | 11.395 | 8.701  | 9.625  | 4.868  | 5.452  |
| 18 | 0.1444 | 11.402 | 8.704  | 9.631  | 4.851  | 5.441  |
| 18 | 0.1454 | 21.841 | 17.583 | 17.904 | 12.612 | 17.310 |
| 18 | 0.1464 | 21.829 | 17.559 | 17.885 | 12.601 | 17.315 |
| 18 | 0.1474 | 11.088 | 11.300 | 14.484 | 12.333 | 18.537 |
| 18 | 0.1484 | 10.404 | 12.651 | 15.093 | 12.819 | 16.825 |
| 18 | 0.1494 | 13.548 | 21.133 | 17.393 | 12.858 | 16.415 |
| 18 | 0.1504 | 13.735 | 17.822 | 18.072 | 18.653 | 11.317 |
| 18 | 0.1514 | 10.149 | 11.962 | 14.050 | 8.159  | 7.921  |
| 18 | 0.1524 | 34.825 | 16.203 | 29.372 | 24.062 | 17.893 |

|    |        |        |        |        |        |        |
|----|--------|--------|--------|--------|--------|--------|
| 18 | 0.1534 | 22.524 | 18.704 | 27.531 | 14.583 | 24.235 |
| 18 | 0.1544 | 16.094 | 16.837 | 13.817 | 9.204  | 16.713 |
| 18 | 0.1554 | 14.767 | 16.939 | 16.553 | 22.750 | 24.344 |
| 18 | 0.1564 | 12.507 | 8.925  | 11.540 | 15.846 | 20.314 |
| 18 | 0.1574 | 11.372 | 10.711 | 14.153 | 16.624 | 21.626 |
| 18 | 0.1584 | 16.233 | 18.669 | 21.879 | 13.346 | 22.360 |
| 18 | 0.1594 | 14.610 | 12.009 | 21.592 | 9.305  | 13.827 |
| 18 | 0.1604 | 17.311 | 16.961 | 19.286 | 20.862 | 26.896 |
| 18 | 0.1614 | 11.885 | 8.230  | 12.192 | 13.021 | 14.115 |
| 18 | 0.1624 | 11.085 | 12.558 | 11.906 | 15.232 | 17.794 |
| 18 | 0.1634 | 15.173 | 10.207 | 15.131 | 13.055 | 15.052 |
| 18 | 0.1644 | 10.923 | 9.931  | 13.468 | 14.658 | 13.967 |
| 18 | 0.1654 | 7.798  | 12.133 | 13.009 | 18.083 | 11.884 |
| 18 | 0.1664 | 16.120 | 14.137 | 16.559 | 14.207 | 28.434 |
| 18 | 0.1674 | 13.857 | 12.091 | 10.582 | 9.395  | 11.603 |
| 18 | 0.1684 | 14.110 | 9.029  | 10.643 | 8.963  | 23.582 |
| 18 | 0.1694 | 8.773  | 11.688 | 11.390 | 14.123 | 18.733 |
| 18 | 0.1704 | 11.938 | 10.935 | 9.902  | 12.796 | 18.633 |
| 18 | 0.1714 | 19.996 | 14.969 | 21.180 | 14.205 | 16.890 |
| 18 | 0.1724 | 14.842 | 15.975 | 18.344 | 13.967 | 17.219 |
| 18 | 0.1734 | 23.081 | 23.694 | 25.768 | 23.589 | 25.962 |
| 18 | 0.1744 | 15.101 | 15.696 | 17.509 | 13.209 | 13.483 |
| 18 | 0.1754 | 16.791 | 13.914 | 14.640 | 19.600 | 20.935 |
| 18 | 0.1764 | 30.926 | 19.047 | 24.771 | 25.825 | 21.984 |
| 18 | 0.1774 | 18.593 | 16.053 | 13.462 | 23.579 | 19.034 |
| 18 | 0.1784 | 16.334 | 15.236 | 16.448 | 32.895 | 23.314 |
| 18 | 0.1794 | 12.822 | 9.849  | 11.579 | 28.896 | 21.060 |
| 18 | 0.1804 | 8.592  | 8.770  | 4.839  | 14.204 | 14.129 |
| 18 | 0.1814 | 14.638 | 20.048 | 11.897 | 29.914 | 15.758 |
| 18 | 0.1824 | 22.362 | 19.903 | 18.575 | 11.737 | 16.376 |
| 18 | 0.1834 | 32.107 | 19.567 | 28.367 | 18.956 | 16.537 |
| 18 | 0.1844 | 22.042 | 20.076 | 19.065 | 22.349 | 24.456 |
| 18 | 0.1854 | 18.397 | 11.146 | 15.857 | 27.865 | 20.002 |
| 18 | 0.1864 | 22.766 | 17.582 | 18.742 | 22.163 | 12.169 |
| 18 | 0.1874 | 16.419 | 9.528  | 12.483 | 14.519 | 14.735 |
| 18 | 0.1884 | 22.713 | 18.567 | 18.301 | 20.194 | 19.730 |
| 18 | 0.1894 | 22.834 | 18.529 | 18.298 | 20.175 | 19.712 |
| 18 | 0.1904 | 13.900 | 10.699 | 12.777 | 14.443 | 21.216 |
| 18 | 0.1914 | 11.213 | 14.058 | 9.936  | 14.322 | 13.281 |
| 18 | 0.1924 | 14.767 | 13.972 | 11.972 | 29.079 | 21.792 |
| 18 | 0.1934 | 19.142 | 10.291 | 11.766 | 18.964 | 14.248 |
| 18 | 0.1944 | 20.449 | 14.328 | 19.324 | 13.642 | 20.583 |
| 18 | 0.1954 | 8.560  | 20.199 | 10.994 | 19.969 | 15.998 |
| 18 | 0.1964 | 4.487  | 14.563 | 8.362  | 12.842 | 21.645 |
| 18 | 0.1974 | 12.703 | 13.113 | 9.750  | 27.918 | 14.126 |
| 18 | 0.1984 | 17.130 | 18.312 | 12.731 | 26.308 | 25.329 |
| 18 | 0.1994 | 16.353 | 15.183 | 11.478 | 23.930 | 6.461  |
| 18 | 0.2004 | 41.391 | 16.379 | 25.633 | 23.539 | 24.911 |
| 18 | 0.2014 | 21.761 | 10.289 | 9.999  | 29.109 | 38.760 |
| 18 | 0.2024 | 13.801 | 11.230 | 9.007  | 16.757 | 15.805 |

|    |        |        |        |        |        |        |
|----|--------|--------|--------|--------|--------|--------|
| 18 | 0.2034 | 12.426 | 12.263 | 8.113  | 19.060 | 12.185 |
| 18 | 0.2044 | 12.141 | 9.023  | 10.065 | 27.874 | 22.438 |
| 18 | 0.2054 | 6.645  | 12.036 | 9.045  | 22.369 | 14.497 |
| 18 | 0.2064 | 22.477 | 11.755 | 13.383 | 17.507 | 24.914 |
| 18 | 0.2074 | 15.339 | 9.012  | 10.482 | 19.010 | 27.810 |
| 18 | 0.2084 | 15.871 | 13.627 | 15.321 | 16.833 | 26.829 |
| 18 | 0.2094 | 14.744 | 17.326 | 16.233 | 13.095 | 11.494 |
| 18 | 0.2104 | 3.420  | 7.397  | 3.460  | 11.286 | 9.964  |
| 18 | 0.2114 | 3.280  | 4.468  | 3.083  | 8.278  | 7.100  |
| 18 | 0.2124 | 10.488 | 7.487  | 9.690  | 21.859 | 13.602 |
| 18 | 0.2134 | 8.920  | 9.866  | 12.818 | 13.628 | 19.532 |
| 18 | 0.2144 | 8.257  | 7.771  | 11.258 | 18.091 | 31.589 |
| 18 | 0.2154 | 20.642 | 20.816 | 22.505 | 16.313 | 10.928 |
| 18 | 0.2164 | 38.111 | 17.137 | 28.215 | 23.806 | 21.015 |
| 18 | 0.2174 | 43.674 | 21.014 | 32.095 | 24.559 | 8.592  |
| 18 | 0.2184 | 11.965 | 7.669  | 11.178 | 14.807 | 5.522  |
| 18 | 0.2194 | 13.836 | 9.548  | 9.938  | 17.063 | 11.855 |
| 18 | 0.2204 | 7.688  | 9.489  | 9.597  | 6.232  | 13.142 |
| 18 | 0.2214 | 12.553 | 6.581  | 10.284 | 11.428 | 18.842 |
| 18 | 0.2224 | 10.036 | 11.010 | 7.775  | 22.453 | 19.089 |
| 18 | 0.2234 | 13.175 | 12.126 | 10.491 | 13.000 | 11.753 |
| 18 | 0.2244 | 16.152 | 11.245 | 16.551 | 13.644 | 11.223 |
| 18 | 0.2254 | 14.684 | 8.301  | 14.245 | 28.491 | 17.535 |
| 18 | 0.2264 | 22.900 | 13.472 | 22.059 | 11.894 | 14.059 |
| 18 | 0.2274 | 21.614 | 12.962 | 19.534 | 13.355 | 8.955  |
| 18 | 0.2284 | 22.388 | 7.673  | 16.909 | 30.058 | 23.274 |
| 18 | 0.2294 | 18.049 | 10.776 | 17.165 | 18.664 | 12.399 |
| 18 | 0.2304 | 10.545 | 6.643  | 12.306 | 15.647 | 3.923  |
| 18 | 0.2314 | 11.202 | 3.712  | 7.149  | 10.465 | 3.396  |
| 18 | 0.2324 | 6.362  | 4.759  | 4.209  | 15.880 | 5.266  |
| 18 | 0.2334 | 9.674  | 8.397  | 8.994  | 20.081 | 8.727  |
| 18 | 0.2344 | 18.701 | 9.818  | 9.238  | 29.040 | 25.949 |
| 18 | 0.2354 | 6.848  | 5.902  | 3.384  | 10.322 | 7.523  |
| 18 | 0.2364 | 8.490  | 8.181  | 6.621  | 5.002  | 5.257  |
| 18 | 0.2374 | 8.575  | 4.718  | 3.987  | 4.089  | 6.854  |
| 18 | 0.2384 | 12.859 | 3.801  | 4.712  | 4.471  | 4.695  |
| 18 | 0.2394 | 15.176 | 6.543  | 5.613  | 5.078  | 6.587  |
| 18 | 0.2404 | 15.416 | 5.894  | 6.732  | 11.582 | 10.661 |
| 18 | 0.2414 | 12.925 | 5.588  | 6.797  | 17.809 | 8.916  |
| 18 | 0.2424 | 15.837 | 6.250  | 9.587  | 16.657 | 12.529 |
| 18 | 0.2434 | 19.825 | 7.813  | 10.739 | 10.221 | 6.514  |
| 18 | 0.2444 | 13.949 | 8.080  | 7.090  | 15.195 | 8.063  |
| 18 | 0.2454 | 12.652 | 5.980  | 6.244  | 5.982  | 7.311  |
| 18 | 0.2464 | 22.159 | 5.493  | 14.152 | 14.049 | 7.274  |
| 18 | 0.2474 | 12.927 | 8.200  | 9.947  | 11.472 | 8.621  |
| 18 | 0.2484 | 34.784 | 16.752 | 27.802 | 25.360 | 11.470 |
| 18 | 0.2494 | 20.651 | 13.720 | 11.858 | 13.232 | 9.366  |
| 18 | 0.2504 | 19.267 | 9.823  | 12.631 | 17.849 | 11.145 |
| 18 | 0.2514 | 19.044 | 9.666  | 12.479 | 17.848 | 11.109 |
| 18 | 0.2524 | 7.843  | 5.253  | 3.146  | 14.419 | 11.689 |



|    |        |        |        |        |        |        |
|----|--------|--------|--------|--------|--------|--------|
| 18 | 0.2534 | 7.381  | 5.785  | 5.438  | 9.806  | 8.333  |
| 18 | 0.2544 | 14.814 | 9.405  | 7.785  | 9.986  | 8.221  |
| 18 | 0.2554 | 19.807 | 10.376 | 11.660 | 16.118 | 7.495  |
| 18 | 0.2564 | 13.744 | 10.550 | 12.797 | 17.940 | 14.564 |
| 18 | 0.2574 | 4.027  | 7.300  | 3.466  | 12.245 | 9.764  |
| 18 | 0.2584 | 9.836  | 8.030  | 5.115  | 17.066 | 13.070 |
| 18 | 0.2594 | 27.046 | 9.544  | 17.467 | 23.984 | 27.281 |
| 18 | 0.2604 | 19.967 | 11.499 | 16.720 | 17.044 | 13.711 |
| 18 | 0.2614 | 19.267 | 14.120 | 8.044  | 21.969 | 19.164 |
| 18 | 0.2624 | 19.413 | 10.107 | 12.697 | 16.184 | 8.955  |
| 18 | 0.2634 | 11.651 | 4.727  | 3.439  | 15.002 | 14.043 |
| 18 | 0.2644 | 15.875 | 8.043  | 6.062  | 22.790 | 11.458 |
| 18 | 0.2654 | 6.650  | 6.470  | 5.705  | 23.209 | 10.976 |
| 18 | 0.2664 | 8.391  | 6.847  | 7.800  | 14.977 | 8.776  |
| 18 | 0.2674 | 13.781 | 6.871  | 10.228 | 10.766 | 11.329 |
| 18 | 0.2684 | 20.212 | 17.833 | 12.465 | 37.583 | 15.016 |
| 18 | 0.2694 | 11.179 | 3.652  | 3.063  | 17.335 | 16.721 |
| 18 | 0.2704 | 14.750 | 5.112  | 16.967 | 17.563 | 14.015 |
| 18 | 0.2714 | 21.758 | 5.765  | 18.784 | 19.321 | 13.745 |
| 18 | 0.2724 | 15.078 | 11.136 | 11.853 | 16.325 | 12.673 |
| 18 | 0.2734 | 8.845  | 6.962  | 8.115  | 21.902 | 17.138 |
| 18 | 0.2744 | 7.297  | 14.281 | 8.800  | 17.548 | 6.671  |
| 18 | 0.2754 | 13.077 | 9.201  | 12.147 | 24.118 | 13.736 |
| 18 | 0.2764 | 1.571  | 4.198  | 3.654  | 3.553  | 10.885 |
| 18 | 0.2774 | 9.770  | 7.258  | 8.935  | 9.527  | 8.608  |
| 18 | 0.2784 | 12.261 | 5.438  | 10.821 | 8.914  | 12.465 |
| 18 | 0.2794 | 12.330 | 10.623 | 14.361 | 15.565 | 15.803 |
| 18 | 0.2804 | 19.062 | 13.957 | 17.086 | 23.416 | 7.205  |
| 18 | 0.2814 | 14.667 | 16.699 | 20.125 | 22.403 | 19.859 |
| 18 | 0.2824 | 12.145 | 9.179  | 18.840 | 25.433 | 17.182 |
| 18 | 0.2834 | 10.133 | 9.993  | 13.546 | 16.302 | 11.492 |
| 18 | 0.2844 | 10.661 | 9.118  | 8.761  | 25.437 | 12.625 |
| 18 | 0.2854 | 12.943 | 10.715 | 11.085 | 20.594 | 15.686 |
| 18 | 0.2864 | 15.670 | 9.070  | 11.202 | 17.479 | 13.098 |
| 18 | 0.2874 | 10.062 | 8.681  | 9.095  | 18.819 | 16.818 |
| 18 | 0.2884 | 6.807  | 8.613  | 7.868  | 18.032 | 14.378 |
| 18 | 0.2894 | 12.996 | 10.957 | 12.301 | 17.156 | 11.991 |
| 18 | 0.2904 | 7.526  | 6.662  | 7.413  | 19.519 | 10.897 |
| 18 | 0.2914 | 9.116  | 4.893  | 4.626  | 7.612  | 8.780  |
| 18 | 0.2924 | 10.744 | 9.806  | 8.983  | 14.974 | 11.051 |
| 18 | 0.2934 | 10.356 | 6.772  | 6.114  | 12.219 | 17.456 |
| 18 | 0.2944 | 6.949  | 5.118  | 8.116  | 18.584 | 29.757 |
| 18 | 0.2954 | 17.661 | 9.011  | 13.268 | 16.972 | 21.058 |
| 18 | 0.2964 | 8.098  | 7.958  | 7.496  | 14.420 | 17.949 |
| 18 | 0.2974 | 19.330 | 18.283 | 26.901 | 17.227 | 17.645 |
| 18 | 0.2984 | 13.914 | 15.099 | 21.820 | 19.988 | 7.892  |
| 18 | 0.2994 | 15.363 | 11.607 | 15.030 | 9.166  | 23.470 |
| 18 | 0.3004 | 15.736 | 10.656 | 19.181 | 15.906 | 22.832 |
| 18 | 0.3014 | 15.033 | 12.716 | 17.339 | 9.172  | 14.321 |
| 18 | 0.3024 | 16.411 | 14.430 | 22.911 | 16.360 | 12.364 |

|    |        |        |        |        |        |        |
|----|--------|--------|--------|--------|--------|--------|
| 18 | 0.3034 | 20.594 | 18.182 | 26.159 | 21.525 | 22.277 |
| 18 | 0.3044 | 11.431 | 7.677  | 14.333 | 5.267  | 9.824  |
| 18 | 0.3054 | 6.306  | 7.371  | 12.304 | 3.076  | 6.918  |
| 18 | 0.3064 | 10.593 | 13.088 | 15.611 | 7.904  | 8.711  |
| 18 | 0.3074 | 13.338 | 10.054 | 12.364 | 20.578 | 17.654 |
| 18 | 0.3084 | 11.818 | 11.759 | 11.216 | 13.152 | 18.060 |
| 18 | 0.3094 | 11.408 | 11.394 | 10.796 | 12.676 | 19.536 |
| 18 | 0.3104 | 4.476  | 7.863  | 8.985  | 12.439 | 4.713  |
| 18 | 0.3114 | 16.197 | 15.141 | 19.834 | 12.591 | 9.028  |
| 18 | 0.3124 | 16.510 | 9.544  | 9.972  | 14.163 | 18.335 |
| 18 | 0.3134 | 10.009 | 16.422 | 21.766 | 7.331  | 11.175 |
| 18 | 0.3144 | 18.805 | 17.251 | 24.011 | 23.300 | 15.066 |
| 18 | 0.3154 | 14.070 | 13.700 | 21.318 | 7.066  | 4.403  |
| 18 | 0.3164 | 14.700 | 16.081 | 19.670 | 13.309 | 9.248  |
| 18 | 0.3174 | 12.753 | 17.649 | 17.473 | 18.317 | 9.208  |
| 18 | 0.3184 | 8.491  | 12.408 | 11.332 | 17.210 | 13.838 |
| 18 | 0.3194 | 12.114 | 10.987 | 16.061 | 13.709 | 20.437 |
| 18 | 0.3204 | 7.782  | 9.709  | 11.039 | 17.786 | 13.163 |
| 18 | 0.3214 | 6.546  | 11.886 | 8.651  | 9.700  | 7.126  |
| 18 | 0.3224 | 12.909 | 11.593 | 11.530 | 16.174 | 18.550 |
| 18 | 0.3234 | 14.860 | 11.421 | 21.253 | 13.220 | 27.159 |
| 18 | 0.3244 | 12.196 | 14.895 | 18.580 | 6.954  | 22.714 |
| 18 | 0.3254 | 10.937 | 7.647  | 7.629  | 8.804  | 10.637 |
| 18 | 0.3264 | 11.784 | 13.037 | 17.888 | 19.314 | 10.077 |
| 18 | 0.3274 | 13.159 | 17.383 | 19.479 | 30.862 | 29.196 |
| 18 | 0.3284 | 9.728  | 20.024 | 27.389 | 19.872 | 22.093 |
| 18 | 0.3294 | 4.799  | 11.107 | 12.417 | 8.912  | 5.677  |
| 18 | 0.3304 | 18.752 | 18.862 | 19.694 | 10.369 | 15.987 |
| 18 | 0.3314 | 10.510 | 8.506  | 13.106 | 11.227 | 22.622 |
| 18 | 0.3324 | 19.882 | 21.070 | 29.209 | 8.954  | 23.817 |
| 18 | 0.3334 | 12.796 | 13.711 | 16.191 | 16.846 | 10.369 |
| 18 | 0.3344 | 21.812 | 10.431 | 19.743 | 15.661 | 17.546 |
| 18 | 0.3354 | 14.976 | 5.260  | 14.662 | 18.989 | 11.525 |
| 18 | 0.3364 | 17.232 | 9.608  | 15.209 | 22.378 | 16.245 |
| 18 | 0.3374 | 8.025  | 15.549 | 12.989 | 19.444 | 15.979 |
| 18 | 0.3384 | 4.954  | 13.541 | 8.953  | 17.774 | 22.151 |
| 18 | 0.3394 | 7.507  | 10.374 | 12.057 | 13.145 | 10.607 |
| 18 | 0.3404 | 10.940 | 8.802  | 7.854  | 12.052 | 12.093 |
| 18 | 0.3414 | 8.510  | 5.878  | 7.942  | 5.508  | 2.067  |
| 18 | 0.3424 | 9.305  | 7.874  | 14.559 | 3.145  | 1.118  |
| 18 | 0.3434 | 7.161  | 7.911  | 9.475  | 3.870  | 9.899  |
| 18 | 0.3444 | 7.881  | 8.273  | 10.311 | 6.887  | 12.323 |
| 18 | 0.3454 | 2.999  | 7.952  | 6.546  | 5.454  | 6.839  |
| 18 | 0.3464 | 2.979  | 7.918  | 6.525  | 5.440  | 6.830  |
| 18 | 0.3474 | 4.495  | 7.886  | 6.889  | 6.038  | 9.255  |
| 18 | 0.3484 | 6.894  | 5.210  | 11.289 | 10.028 | 1.684  |
| 18 | 0.3494 | 7.641  | 5.044  | 11.538 | 11.251 | 1.576  |
| 18 | 0.3504 | 6.160  | 9.069  | 10.979 | 4.127  | 6.547  |
| 18 | 0.3514 | 6.800  | 8.314  | 9.264  | 4.522  | 2.977  |
| 18 | 0.3524 | 3.418  | 8.403  | 8.254  | 6.721  | 11.497 |

|    |        |        |        |        |        |        |
|----|--------|--------|--------|--------|--------|--------|
| 18 | 0.3534 | 4.828  | 6.344  | 5.973  | 5.245  | 12.067 |
| 18 | 0.3544 | 2.920  | 8.792  | 4.675  | 8.973  | 14.358 |
| 18 | 0.3554 | 3.858  | 3.934  | 7.868  | 6.034  | 6.331  |
| 18 | 0.3564 | 2.805  | 1.984  | 5.450  | 5.396  | 4.151  |
| 18 | 0.3574 | 7.237  | 8.519  | 17.392 | 9.063  | 21.392 |
| 18 | 0.3584 | 7.162  | 6.241  | 10.968 | 5.716  | 11.340 |
| 18 | 0.3594 | 2.084  | 2.631  | 2.448  | 2.090  | 16.834 |
| 18 | 0.3604 | 0.923  | 0.559  | 1.193  | 2.338  | 9.447  |
| 18 | 0.3614 | 4.736  | 6.118  | 4.366  | 14.825 | 14.117 |
| 18 | 0.3624 | 7.431  | 9.964  | 12.601 | 7.723  | 12.428 |
| 18 | 0.3634 | 11.142 | 11.179 | 13.253 | 11.689 | 11.495 |
| 18 | 0.3644 | 14.885 | 12.658 | 19.053 | 4.641  | 6.093  |
| 18 | 0.3654 | 19.211 | 16.258 | 29.678 | 3.442  | 7.805  |
| 18 | 0.3664 | 15.546 | 14.326 | 19.027 | 11.816 | 11.117 |
| 18 | 0.3674 | 6.818  | 6.634  | 6.992  | 17.138 | 19.041 |
| 18 | 0.3684 | 16.566 | 19.130 | 20.922 | 16.741 | 10.124 |
| 18 | 0.3694 | 14.555 | 16.860 | 17.259 | 15.646 | 13.215 |
| 18 | 0.3704 | 14.552 | 16.879 | 17.298 | 15.743 | 13.199 |
| 18 | 0.3714 | 6.881  | 10.737 | 5.588  | 14.491 | 17.168 |
| 18 | 0.3724 | 22.328 | 16.013 | 19.601 | 7.368  | 15.963 |
| 18 | 0.3734 | 6.895  | 7.069  | 9.195  | 9.427  | 7.756  |
| 18 | 0.3744 | 4.658  | 4.177  | 4.610  | 4.086  | 13.109 |
| 18 | 0.3754 | 11.699 | 11.691 | 12.164 | 7.545  | 8.846  |
| 18 | 0.3764 | 6.186  | 8.426  | 8.031  | 7.075  | 7.687  |
| 18 | 0.3774 | 8.185  | 9.613  | 7.785  | 2.650  | 2.663  |
| 18 | 0.3784 | 2.641  | 2.357  | 3.775  | 2.064  | 1.255  |
| 18 | 0.3794 | 4.777  | 4.880  | 7.035  | 7.661  | 5.902  |
| 18 | 0.3804 | 3.615  | 2.314  | 7.532  | 5.801  | 12.658 |
| 18 | 0.3814 | 9.825  | 8.821  | 14.764 | 6.870  | 8.668  |
| 18 | 0.3824 | 18.668 | 13.127 | 20.096 | 17.015 | 11.836 |
| 18 | 0.3834 | 7.702  | 9.956  | 10.567 | 16.667 | 12.019 |
| 18 | 0.3844 | 4.160  | 6.137  | 6.400  | 7.841  | 9.368  |
| 18 | 0.3854 | 2.549  | 0.618  | 1.374  | 4.886  | 4.500  |
| 18 | 0.3864 | 2.656  | 4.369  | 4.060  | 12.483 | 6.119  |
| 18 | 0.3874 | 8.952  | 7.300  | 13.625 | 16.150 | 6.566  |
| 18 | 0.3884 | 13.540 | 11.256 | 18.102 | 17.159 | 9.608  |
| 18 | 0.3894 | 10.429 | 14.106 | 13.100 | 14.300 | 9.128  |
| 18 | 0.3904 | 8.754  | 12.261 | 11.335 | 9.284  | 11.389 |
| 18 | 0.3914 | 7.147  | 10.875 | 11.315 | 10.304 | 12.118 |
| 18 | 0.3924 | 9.223  | 12.945 | 14.490 | 11.508 | 18.144 |
| 18 | 0.3934 | 11.327 | 9.619  | 10.812 | 12.262 | 17.625 |
| 18 | 0.3944 | 10.043 | 8.279  | 11.845 | 20.469 | 22.457 |
| 18 | 0.3954 | 10.025 | 8.306  | 11.742 | 20.399 | 22.423 |
| 18 | 0.3964 | 9.217  | 12.698 | 10.780 | 20.784 | 20.262 |
| 18 | 0.3974 | 8.259  | 8.029  | 10.104 | 19.491 | 22.993 |
| 18 | 0.3984 | 6.386  | 6.593  | 6.403  | 4.716  | 11.682 |
| 18 | 0.3994 | 13.691 | 5.252  | 6.726  | 12.375 | 11.416 |
| 18 | 0.4004 | 13.008 | 9.611  | 12.979 | 28.129 | 21.765 |
| 18 | 0.4014 | 13.361 | 10.029 | 12.588 | 12.649 | 25.527 |
| 18 | 0.4024 | 15.464 | 13.605 | 8.964  | 18.519 | 31.296 |

|    |        |        |        |        |        |        |
|----|--------|--------|--------|--------|--------|--------|
| 18 | 0.4034 | 16.024 | 10.722 | 10.662 | 21.542 | 23.758 |
| 18 | 0.4044 | 12.169 | 11.042 | 12.697 | 13.416 | 19.397 |
| 18 | 0.4054 | 10.527 | 11.159 | 10.710 | 14.930 | 22.645 |
| 18 | 0.4064 | 8.301  | 8.881  | 10.005 | 13.533 | 17.711 |
| 18 | 0.4074 | 5.981  | 7.725  | 6.708  | 6.758  | 4.033  |
| 18 | 0.4084 | 2.937  | 2.465  | 3.038  | 6.504  | 9.192  |
| 18 | 0.4094 | 5.534  | 3.578  | 4.361  | 8.300  | 18.364 |
| 18 | 0.4104 | 5.801  | 7.825  | 7.136  | 15.812 | 14.487 |
| 18 | 0.4114 | 7.777  | 6.389  | 8.495  | 10.349 | 10.660 |
| 18 | 0.4124 | 12.014 | 9.531  | 18.382 | 4.494  | 13.436 |
| 18 | 0.4134 | 9.767  | 14.781 | 15.779 | 15.939 | 14.725 |
| 18 | 0.4144 | 6.900  | 8.858  | 7.609  | 24.967 | 13.372 |
| 18 | 0.4154 | 13.150 | 15.369 | 16.829 | 18.215 | 21.591 |
| 18 | 0.4164 | 22.384 | 17.489 | 19.935 | 12.554 | 17.034 |
| 18 | 0.4174 | 24.611 | 17.520 | 20.645 | 13.299 | 13.515 |
| 18 | 0.4184 | 9.766  | 7.649  | 11.779 | 14.500 | 16.524 |
| 18 | 0.4194 | 15.087 | 17.519 | 14.446 | 14.559 | 9.247  |
| 18 | 0.4204 | 20.753 | 22.341 | 25.213 | 18.368 | 12.687 |
| 18 | 0.4214 | 12.837 | 11.585 | 13.387 | 11.919 | 13.381 |
| 18 | 0.4224 | 14.811 | 6.998  | 15.837 | 13.708 | 14.436 |
| 18 | 0.4234 | 12.444 | 8.328  | 14.123 | 7.684  | 9.110  |
| 18 | 0.4244 | 13.953 | 14.526 | 19.269 | 5.699  | 3.785  |
| 18 | 0.4254 | 20.942 | 20.538 | 23.051 | 8.260  | 7.620  |
| 18 | 0.4264 | 17.308 | 17.754 | 26.158 | 8.594  | 3.215  |
| 18 | 0.4274 | 8.872  | 5.695  | 8.962  | 8.037  | 16.140 |
| 18 | 0.4284 | 12.529 | 5.201  | 13.904 | 4.695  | 14.098 |
| 18 | 0.4294 | 10.631 | 8.664  | 15.019 | 13.882 | 14.120 |
| 18 | 0.4304 | 13.505 | 12.178 | 16.332 | 9.785  | 12.496 |
| 18 | 0.4314 | 20.526 | 16.683 | 28.051 | 17.654 | 8.664  |
| 18 | 0.4324 | 18.337 | 20.740 | 18.188 | 8.006  | 10.188 |
| 18 | 0.4334 | 10.129 | 9.543  | 12.826 | 5.961  | 9.970  |
| 18 | 0.4344 | 14.810 | 15.667 | 18.200 | 6.128  | 10.421 |
| 18 | 0.4354 | 22.128 | 18.808 | 25.592 | 16.892 | 14.512 |
| 18 | 0.4364 | 15.141 | 16.334 | 17.926 | 13.739 | 4.938  |
| 18 | 0.4374 | 10.230 | 12.004 | 14.978 | 15.281 | 7.037  |
| 18 | 0.4384 | 7.806  | 7.066  | 11.026 | 9.958  | 6.910  |
| 18 | 0.4394 | 13.902 | 11.885 | 15.585 | 7.515  | 10.784 |
| 18 | 0.4404 | 13.991 | 11.903 | 15.643 | 7.623  | 10.739 |
| 18 | 0.4414 | 14.080 | 11.926 | 15.701 | 7.732  | 10.695 |
| 18 | 0.4424 | 14.168 | 11.953 | 15.760 | 7.840  | 10.655 |
| 18 | 0.4434 | 10.432 | 8.726  | 15.013 | 13.706 | 28.345 |
| 18 | 0.4444 | 10.831 | 10.401 | 15.175 | 8.286  | 23.440 |
| 18 | 0.4454 | 19.732 | 11.734 | 16.160 | 10.874 | 12.642 |
| 18 | 0.4464 | 12.689 | 7.752  | 13.737 | 10.514 | 10.455 |
| 18 | 0.4474 | 20.013 | 16.685 | 19.736 | 16.789 | 17.128 |
| 18 | 0.4484 | 17.726 | 15.462 | 24.690 | 9.002  | 18.181 |
| 18 | 0.4494 | 25.708 | 27.391 | 30.979 | 9.468  | 13.179 |
| 18 | 0.4504 | 15.382 | 5.612  | 19.946 | 15.088 | 11.696 |
| 18 | 0.4514 | 16.648 | 13.781 | 22.335 | 15.445 | 12.246 |
| 18 | 0.4524 | 6.267  | 5.345  | 6.407  | 13.748 | 15.635 |

|    |        |        |        |        |        |        |
|----|--------|--------|--------|--------|--------|--------|
| 18 | 0.4534 | 14.320 | 11.593 | 16.734 | 11.629 | 20.316 |
| 18 | 0.4544 | 4.931  | 7.735  | 6.034  | 10.855 | 12.578 |
| 18 | 0.4554 | 10.565 | 20.902 | 14.770 | 17.564 | 7.454  |
| 18 | 0.4564 | 8.008  | 11.893 | 15.419 | 12.649 | 15.008 |
| 18 | 0.4574 | 13.252 | 19.957 | 22.246 | 13.029 | 17.714 |
| 18 | 0.4584 | 11.669 | 6.793  | 9.040  | 4.344  | 10.683 |
| 18 | 0.4594 | 9.118  | 10.281 | 12.314 | 5.460  | 9.679  |
| 18 | 0.4604 | 18.556 | 11.210 | 21.684 | 5.563  | 8.700  |
| 18 | 0.4614 | 19.922 | 8.387  | 20.119 | 15.754 | 16.939 |
| 18 | 0.4624 | 17.856 | 10.573 | 19.995 | 13.109 | 16.168 |
| 18 | 0.4634 | 12.910 | 8.100  | 9.552  | 12.655 | 14.130 |
| 18 | 0.4644 | 14.244 | 7.177  | 14.819 | 14.050 | 16.725 |
| 18 | 0.4654 | 12.756 | 8.759  | 14.620 | 8.044  | 13.024 |
| 18 | 0.4664 | 6.943  | 7.623  | 9.109  | 7.887  | 17.142 |
| 18 | 0.4674 | 14.225 | 16.734 | 18.052 | 11.721 | 18.455 |
| 18 | 0.4684 | 14.868 | 10.599 | 17.292 | 12.736 | 20.256 |
| 18 | 0.4694 | 14.863 | 10.601 | 17.310 | 12.712 | 20.279 |
| 18 | 0.4704 | 12.180 | 9.139  | 18.695 | 13.363 | 9.448  |
| 18 | 0.4714 | 20.456 | 12.203 | 21.395 | 16.869 | 11.379 |
| 18 | 0.4724 | 14.055 | 6.403  | 19.014 | 8.527  | 8.997  |
| 18 | 0.4734 | 17.116 | 14.286 | 20.585 | 23.042 | 19.966 |
| 18 | 0.4744 | 9.680  | 4.236  | 11.659 | 17.441 | 12.473 |
| 18 | 0.4754 | 25.939 | 14.058 | 23.529 | 26.185 | 15.116 |
| 18 | 0.4764 | 22.825 | 12.574 | 21.161 | 21.741 | 15.462 |
| 18 | 0.4774 | 11.033 | 5.757  | 12.096 | 9.706  | 15.575 |
| 18 | 0.4784 | 22.387 | 7.269  | 13.862 | 19.239 | 22.349 |
| 18 | 0.4794 | 20.687 | 9.110  | 15.705 | 15.775 | 15.027 |
| 18 | 0.4804 | 12.744 | 9.303  | 9.601  | 7.489  | 23.979 |
| 18 | 0.4814 | 12.448 | 8.941  | 9.121  | 7.460  | 23.770 |
| 18 | 0.4824 | 13.476 | 7.337  | 14.583 | 12.621 | 7.904  |
| 18 | 0.4834 | 23.355 | 14.890 | 23.232 | 30.915 | 14.720 |
| 18 | 0.4844 | 16.459 | 9.542  | 16.119 | 11.319 | 6.905  |
| 18 | 0.4854 | 16.010 | 11.456 | 20.548 | 13.673 | 6.985  |
| 18 | 0.4864 | 16.098 | 11.382 | 20.617 | 13.679 | 7.008  |
| 18 | 0.4874 | 15.360 | 13.340 | 13.201 | 9.000  | 6.812  |
| 18 | 0.4884 | 20.932 | 23.523 | 16.502 | 16.526 | 15.400 |
| 18 | 0.4894 | 11.385 | 6.688  | 8.045  | 21.297 | 14.006 |
| 18 | 0.4904 | 9.594  | 4.185  | 9.827  | 12.791 | 8.014  |
| 18 | 0.4914 | 10.274 | 4.853  | 10.779 | 13.679 | 8.735  |
| 18 | 0.4924 | 12.710 | 7.934  | 10.450 | 4.379  | 14.427 |
| 18 | 0.4934 | 15.007 | 12.814 | 13.071 | 13.857 | 22.148 |
| 18 | 0.4944 | 5.951  | 9.546  | 5.481  | 6.942  | 18.511 |
| 18 | 0.4954 | 12.903 | 12.951 | 13.333 | 28.398 | 20.106 |
| 18 | 0.4964 | 9.015  | 6.300  | 12.955 | 27.272 | 9.248  |
| 18 | 0.4974 | 22.582 | 17.202 | 25.772 | 24.892 | 13.126 |
| 18 | 0.4984 | 17.693 | 10.377 | 15.276 | 12.543 | 7.306  |
| 18 | 0.4994 | 9.863  | 13.562 | 12.636 | 20.563 | 9.525  |
| 18 | 0.5004 | 15.985 | 11.097 | 18.398 | 23.058 | 25.834 |
| 18 | 0.5014 | 16.032 | 11.037 | 18.341 | 23.069 | 25.961 |
| 18 | 0.5024 | 16.078 | 10.978 | 18.296 | 23.045 | 26.078 |

|    |        |        |        |        |        |        |
|----|--------|--------|--------|--------|--------|--------|
| 18 | 0.5034 | 11.481 | 6.865  | 16.019 | 17.964 | 16.015 |
| 18 | 0.5044 | 19.895 | 11.248 | 20.809 | 17.057 | 16.469 |
| 18 | 0.5054 | 22.482 | 10.568 | 22.621 | 16.231 | 14.082 |
| 18 | 0.5064 | 31.004 | 18.893 | 26.691 | 23.379 | 23.202 |
| 18 | 0.5074 | 16.877 | 20.646 | 18.664 | 16.684 | 11.320 |
| 18 | 0.5084 | 10.565 | 8.958  | 7.864  | 18.521 | 17.898 |
| 18 | 0.5094 | 9.305  | 4.899  | 7.301  | 19.274 | 19.639 |
| 18 | 0.5104 | 12.196 | 5.550  | 9.470  | 30.252 | 32.799 |
| 18 | 0.5114 | 17.736 | 9.798  | 16.846 | 25.255 | 21.432 |
| 18 | 0.5124 | 22.098 | 10.087 | 13.695 | 33.373 | 26.205 |
| 18 | 0.5134 | 18.210 | 20.637 | 17.047 | 18.450 | 19.092 |
| 18 | 0.5144 | 22.957 | 9.236  | 20.076 | 18.444 | 15.963 |
| 18 | 0.5154 | 21.826 | 14.683 | 23.506 | 20.269 | 4.613  |
| 18 | 0.5164 | 21.764 | 14.695 | 23.341 | 20.072 | 4.579  |
| 18 | 0.5174 | 22.204 | 14.195 | 20.421 | 12.540 | 6.074  |
| 18 | 0.5184 | 29.822 | 11.592 | 24.441 | 16.281 | 9.966  |
| 18 | 0.5194 | 17.075 | 7.966  | 9.054  | 16.198 | 12.747 |
| 18 | 0.5204 | 9.012  | 8.529  | 7.620  | 10.639 | 25.904 |
| 18 | 0.5214 | 10.383 | 9.230  | 12.570 | 8.183  | 9.904  |
| 18 | 0.5224 | 17.271 | 6.253  | 11.031 | 20.091 | 18.235 |
| 18 | 0.5234 | 15.405 | 7.697  | 12.275 | 22.996 | 20.321 |
| 18 | 0.5244 | 13.663 | 4.826  | 10.091 | 11.644 | 9.803  |
| 18 | 0.5254 | 15.821 | 4.992  | 11.768 | 14.526 | 7.750  |
| 18 | 0.5264 | 11.232 | 5.625  | 11.082 | 12.579 | 9.445  |
| 18 | 0.5274 | 5.828  | 4.976  | 3.791  | 17.224 | 12.653 |
| 18 | 0.5284 | 8.741  | 4.577  | 7.574  | 5.639  | 2.812  |
| 18 | 0.5294 | 9.241  | 6.214  | 7.181  | 7.752  | 13.473 |
| 18 | 0.5304 | 17.829 | 3.767  | 10.498 | 19.798 | 30.738 |
| 18 | 0.5314 | 20.519 | 8.296  | 14.444 | 20.956 | 30.966 |
| 18 | 0.5324 | 20.882 | 8.480  | 14.460 | 20.762 | 30.913 |
| 18 | 0.5334 | 19.146 | 12.721 | 19.411 | 14.496 | 18.323 |
| 18 | 0.5344 | 26.422 | 6.492  | 17.893 | 19.641 | 9.942  |
| 18 | 0.5354 | 14.442 | 10.726 | 11.591 | 8.355  | 10.886 |
| 18 | 0.5364 | 15.706 | 13.936 | 19.080 | 23.975 | 18.401 |
| 18 | 0.5374 | 15.090 | 11.384 | 10.759 | 18.913 | 18.494 |
| 18 | 0.5384 | 32.484 | 14.796 | 13.309 | 22.330 | 12.386 |
| 18 | 0.5394 | 18.408 | 21.485 | 16.549 | 16.062 | 10.433 |
| 18 | 0.5404 | 15.634 | 14.766 | 13.747 | 10.134 | 14.129 |
| 18 | 0.5414 | 12.085 | 10.528 | 8.787  | 9.900  | 11.048 |
| 18 | 0.5424 | 17.713 | 9.345  | 8.303  | 9.496  | 17.385 |
| 18 | 0.5434 | 12.028 | 7.878  | 14.029 | 10.650 | 24.161 |
| 18 | 0.5444 | 7.888  | 5.364  | 5.272  | 7.635  | 16.024 |
| 18 | 0.5454 | 10.765 | 4.228  | 10.717 | 4.702  | 15.915 |
| 18 | 0.5464 | 5.605  | 4.061  | 8.880  | 5.212  | 24.507 |
| 18 | 0.5474 | 12.028 | 6.560  | 8.856  | 8.191  | 24.487 |
| 18 | 0.5484 | 20.205 | 11.200 | 17.723 | 8.928  | 17.999 |
| 18 | 0.5494 | 14.251 | 8.373  | 13.227 | 12.979 | 7.460  |
| 18 | 0.5504 | 23.355 | 11.601 | 17.650 | 13.553 | 17.986 |
| 18 | 0.5514 | 17.846 | 10.889 | 13.511 | 14.854 | 14.127 |
| 18 | 0.5524 | 10.776 | 6.979  | 9.866  | 6.409  | 10.890 |

|    |        |        |        |        |        |        |
|----|--------|--------|--------|--------|--------|--------|
| 18 | 0.5534 | 15.676 | 19.707 | 21.728 | 15.784 | 15.292 |
| 18 | 0.5544 | 8.543  | 11.849 | 7.583  | 7.891  | 10.948 |
| 18 | 0.5554 | 10.012 | 8.630  | 9.529  | 6.210  | 18.847 |
| 18 | 0.5564 | 9.826  | 8.340  | 7.596  | 8.383  | 18.141 |
| 18 | 0.5574 | 21.123 | 19.666 | 14.975 | 20.071 | 20.922 |
| 18 | 0.5584 | 11.289 | 7.506  | 12.122 | 7.343  | 12.465 |
| 18 | 0.5594 | 4.448  | 3.510  | 6.502  | 10.885 | 9.497  |
| 18 | 0.5604 | 4.719  | 3.694  | 6.194  | 13.313 | 9.100  |
| 18 | 0.5614 | 12.824 | 10.318 | 14.935 | 16.697 | 14.335 |
| 18 | 0.5624 | 17.108 | 16.118 | 19.015 | 14.194 | 13.409 |
| 18 | 0.5634 | 17.082 | 16.198 | 19.060 | 14.225 | 13.354 |
| 18 | 0.5644 | 12.661 | 14.119 | 14.115 | 17.315 | 20.520 |
| 18 | 0.5654 | 8.908  | 13.349 | 14.673 | 14.288 | 21.745 |
| 18 | 0.5664 | 8.916  | 13.357 | 14.907 | 14.371 | 21.904 |
| 18 | 0.5674 | 8.931  | 13.364 | 15.141 | 14.468 | 22.055 |
| 18 | 0.5684 | 15.518 | 8.037  | 11.857 | 11.862 | 16.449 |
| 18 | 0.5694 | 15.368 | 17.759 | 11.052 | 13.246 | 13.058 |
| 18 | 0.5704 | 20.843 | 19.282 | 17.074 | 14.537 | 9.683  |
| 18 | 0.5714 | 18.428 | 15.490 | 12.496 | 13.259 | 12.168 |
| 18 | 0.5724 | 14.533 | 17.055 | 13.767 | 17.438 | 7.917  |
| 18 | 0.5734 | 14.423 | 16.946 | 13.655 | 17.425 | 7.805  |
| 18 | 0.5744 | 10.160 | 7.310  | 8.806  | 14.101 | 16.921 |
| 18 | 0.5754 | 10.128 | 7.197  | 8.727  | 14.061 | 16.804 |
| 18 | 0.5764 | 12.675 | 15.029 | 11.313 | 17.591 | 24.338 |
| 18 | 0.5774 | 17.543 | 19.831 | 22.659 | 9.959  | 21.289 |
| 18 | 0.5784 | 10.714 | 10.808 | 15.834 | 12.021 | 21.776 |
| 18 | 0.5794 | 13.001 | 7.309  | 11.881 | 5.658  | 9.444  |
| 18 | 0.5804 | 12.890 | 7.296  | 11.841 | 5.702  | 9.201  |
| 18 | 0.5814 | 12.781 | 7.285  | 11.802 | 5.753  | 8.962  |
| 18 | 0.5824 | 15.736 | 14.206 | 19.725 | 13.082 | 17.505 |
| 18 | 0.5834 | 12.449 | 7.735  | 12.978 | 15.544 | 8.461  |
| 18 | 0.5844 | 11.174 | 8.488  | 11.329 | 5.692  | 8.597  |
| 18 | 0.5854 | 5.936  | 4.243  | 2.829  | 9.814  | 9.850  |
| 18 | 0.5864 | 15.290 | 14.137 | 12.886 | 4.048  | 20.601 |
| 18 | 0.5874 | 17.431 | 18.385 | 13.731 | 4.882  | 12.517 |
| 18 | 0.5884 | 8.401  | 10.650 | 9.896  | 15.048 | 14.870 |
| 18 | 0.5894 | 8.321  | 6.000  | 8.166  | 10.735 | 6.214  |
| 18 | 0.5904 | 9.517  | 17.146 | 12.132 | 11.446 | 12.538 |
| 18 | 0.5914 | 15.697 | 8.296  | 13.167 | 12.151 | 18.629 |
| 18 | 0.5924 | 16.646 | 9.132  | 15.556 | 13.902 | 9.260  |
| 18 | 0.5934 | 15.028 | 15.210 | 16.608 | 15.496 | 17.722 |
| 18 | 0.5944 | 12.003 | 12.659 | 15.497 | 10.389 | 10.586 |
| 18 | 0.5954 | 11.224 | 10.945 | 12.466 | 11.430 | 12.409 |
| 18 | 0.5964 | 7.192  | 8.164  | 7.761  | 8.525  | 12.524 |
| 18 | 0.5974 | 15.251 | 13.277 | 14.511 | 16.172 | 28.405 |
| 18 | 0.5984 | 9.459  | 8.898  | 8.022  | 7.189  | 18.543 |
| 18 | 0.5994 | 9.616  | 8.896  | 8.077  | 7.191  | 18.539 |
| 18 | 0.6004 | 7.329  | 10.521 | 12.191 | 9.367  | 13.780 |
| 18 | 0.6014 | 17.262 | 20.841 | 21.911 | 12.810 | 18.468 |
| 18 | 0.6024 | 5.691  | 10.669 | 10.182 | 14.402 | 18.891 |

|    |        |        |        |        |        |        |
|----|--------|--------|--------|--------|--------|--------|
| 18 | 0.6034 | 4.283  | 6.055  | 4.432  | 19.716 | 33.834 |
| 18 | 0.6044 | 7.835  | 5.053  | 8.252  | 21.570 | 26.420 |
| 18 | 0.6054 | 7.813  | 6.366  | 2.900  | 19.532 | 26.007 |
| 18 | 0.6064 | 20.854 | 12.934 | 20.777 | 8.463  | 13.761 |
| 18 | 0.6074 | 14.459 | 12.422 | 16.400 | 15.396 | 16.683 |
| 18 | 0.6084 | 8.188  | 6.355  | 10.965 | 6.944  | 9.321  |
| 18 | 0.6094 | 0.898  | 1.083  | 1.142  | 1.180  | 1.328  |
| 19 | 0.0023 | 0.000  | 0.000  | 0.000  | 0.000  | 0.000  |
| 19 | 0.0033 | 13.030 | 7.676  | 11.572 | 9.576  | 8.357  |
| 19 | 0.0043 | 6.408  | 10.462 | 5.499  | 14.700 | 8.844  |
| 19 | 0.0053 | 13.688 | 17.488 | 16.702 | 16.634 | 21.694 |
| 19 | 0.0063 | 16.443 | 17.194 | 17.649 | 16.865 | 25.128 |
| 19 | 0.0073 | 17.629 | 20.599 | 17.924 | 23.014 | 22.699 |
| 19 | 0.0083 | 11.591 | 12.638 | 9.499  | 10.571 | 11.540 |
| 19 | 0.0093 | 17.407 | 20.190 | 12.116 | 15.620 | 16.801 |
| 19 | 0.0103 | 18.374 | 21.028 | 13.205 | 18.718 | 19.722 |
| 19 | 0.0113 | 4.676  | 9.172  | 6.401  | 9.535  | 14.514 |
| 19 | 0.0123 | 6.413  | 8.294  | 5.003  | 6.688  | 21.152 |
| 19 | 0.0133 | 19.740 | 17.016 | 14.980 | 12.759 | 23.782 |
| 19 | 0.0143 | 14.779 | 15.992 | 14.995 | 15.829 | 18.556 |
| 19 | 0.0153 | 18.036 | 16.204 | 14.083 | 12.624 | 16.390 |
| 19 | 0.0163 | 11.810 | 8.374  | 11.224 | 10.873 | 10.303 |
| 19 | 0.0173 | 7.223  | 10.671 | 8.985  | 13.381 | 11.167 |
| 19 | 0.0183 | 4.785  | 5.949  | 8.195  | 8.204  | 16.459 |
| 19 | 0.0193 | 21.871 | 25.617 | 22.791 | 8.060  | 12.418 |
| 19 | 0.0203 | 26.633 | 21.626 | 22.165 | 19.139 | 23.635 |
| 19 | 0.0213 | 23.355 | 18.073 | 17.435 | 28.281 | 32.081 |
| 19 | 0.0223 | 15.128 | 15.458 | 12.931 | 24.103 | 28.602 |
| 19 | 0.0233 | 10.441 | 15.344 | 9.565  | 13.922 | 31.270 |
| 19 | 0.0243 | 9.358  | 6.519  | 5.841  | 13.474 | 12.689 |
| 19 | 0.0253 | 8.823  | 9.605  | 13.307 | 13.553 | 18.917 |
| 19 | 0.0263 | 14.714 | 16.212 | 16.823 | 15.237 | 24.963 |
| 19 | 0.0273 | 17.628 | 16.171 | 17.732 | 7.928  | 14.290 |
| 19 | 0.0283 | 15.047 | 11.744 | 10.264 | 11.627 | 11.873 |
| 19 | 0.0293 | 16.722 | 13.387 | 18.905 | 15.146 | 18.547 |
| 19 | 0.0303 | 29.724 | 18.183 | 30.372 | 13.465 | 30.039 |
| 19 | 0.0313 | 12.401 | 14.242 | 10.661 | 19.402 | 14.850 |
| 19 | 0.0323 | 11.106 | 11.746 | 6.689  | 10.777 | 13.365 |
| 19 | 0.0333 | 7.153  | 10.361 | 10.808 | 10.786 | 15.132 |
| 19 | 0.0343 | 15.691 | 18.161 | 11.901 | 17.094 | 17.298 |
| 19 | 0.0353 | 12.816 | 14.421 | 14.082 | 19.286 | 13.249 |
| 19 | 0.0363 | 17.578 | 16.568 | 17.317 | 20.363 | 22.751 |
| 19 | 0.0373 | 10.890 | 12.443 | 8.479  | 19.497 | 25.583 |
| 19 | 0.0383 | 9.345  | 12.516 | 12.171 | 20.289 | 31.128 |
| 19 | 0.0393 | 20.746 | 11.240 | 15.381 | 23.405 | 24.441 |
| 19 | 0.0403 | 13.404 | 7.514  | 10.682 | 13.423 | 33.747 |
| 19 | 0.0413 | 9.447  | 11.518 | 13.046 | 14.063 | 26.621 |
| 19 | 0.0423 | 8.909  | 15.063 | 10.730 | 12.952 | 17.650 |
| 19 | 0.0433 | 10.703 | 14.293 | 12.055 | 12.803 | 27.420 |
| 19 | 0.0443 | 20.524 | 16.273 | 20.084 | 10.485 | 31.607 |



|    |        |        |        |        |        |        |
|----|--------|--------|--------|--------|--------|--------|
| 19 | 0.0453 | 11.394 | 10.393 | 10.890 | 4.333  | 7.606  |
| 19 | 0.0463 | 19.936 | 14.569 | 22.048 | 14.174 | 24.554 |
| 19 | 0.0473 | 17.616 | 13.997 | 12.500 | 7.237  | 21.505 |
| 19 | 0.0483 | 10.278 | 11.831 | 9.892  | 21.745 | 33.910 |
| 19 | 0.0493 | 14.098 | 12.633 | 9.270  | 12.052 | 30.402 |
| 19 | 0.0503 | 11.572 | 8.918  | 9.169  | 12.907 | 28.107 |
| 19 | 0.0513 | 13.414 | 9.012  | 11.813 | 11.184 | 25.641 |
| 19 | 0.0523 | 14.932 | 10.337 | 11.132 | 18.998 | 24.932 |
| 19 | 0.0533 | 20.963 | 14.077 | 13.456 | 18.145 | 32.642 |
| 19 | 0.0543 | 19.731 | 8.784  | 14.580 | 19.996 | 23.883 |
| 19 | 0.0553 | 11.099 | 7.978  | 9.643  | 20.335 | 37.866 |
| 19 | 0.0563 | 12.595 | 12.546 | 17.274 | 17.257 | 10.847 |
| 19 | 0.0573 | 12.476 | 12.526 | 17.028 | 17.266 | 10.880 |
| 19 | 0.0583 | 10.528 | 7.611  | 15.308 | 8.013  | 21.600 |
| 19 | 0.0593 | 8.184  | 7.594  | 9.914  | 12.131 | 35.835 |
| 19 | 0.0603 | 8.156  | 11.695 | 9.182  | 16.158 | 29.019 |
| 19 | 0.0613 | 11.371 | 11.059 | 16.544 | 24.235 | 30.037 |
| 19 | 0.0623 | 15.215 | 19.995 | 18.397 | 21.619 | 25.498 |
| 19 | 0.0633 | 13.151 | 17.357 | 13.036 | 12.683 | 15.361 |
| 19 | 0.0643 | 16.759 | 9.140  | 8.446  | 15.978 | 27.269 |
| 19 | 0.0653 | 18.679 | 8.698  | 12.996 | 14.556 | 24.697 |
| 19 | 0.0663 | 20.913 | 18.289 | 17.628 | 13.878 | 26.634 |
| 19 | 0.0673 | 12.483 | 9.059  | 6.926  | 10.795 | 17.673 |
| 19 | 0.0683 | 11.060 | 6.343  | 9.103  | 8.671  | 21.041 |
| 19 | 0.0693 | 7.644  | 9.738  | 8.520  | 9.820  | 17.702 |
| 19 | 0.0703 | 13.988 | 13.829 | 10.578 | 12.182 | 18.447 |
| 19 | 0.0713 | 12.247 | 20.198 | 17.854 | 15.524 | 13.100 |
| 19 | 0.0723 | 19.462 | 18.148 | 13.126 | 13.023 | 15.034 |
| 19 | 0.0733 | 20.604 | 17.064 | 15.873 | 25.626 | 10.345 |
| 19 | 0.0743 | 11.285 | 8.129  | 7.936  | 17.145 | 16.688 |
| 19 | 0.0753 | 11.331 | 7.945  | 8.041  | 16.694 | 16.733 |
| 19 | 0.0763 | 15.954 | 16.622 | 15.379 | 19.095 | 27.048 |
| 19 | 0.0773 | 18.978 | 19.234 | 21.462 | 20.683 | 25.024 |
| 19 | 0.0783 | 24.386 | 21.456 | 21.413 | 10.531 | 12.448 |
| 19 | 0.0793 | 14.918 | 13.378 | 17.077 | 11.407 | 8.876  |
| 19 | 0.0803 | 15.310 | 10.352 | 14.970 | 13.269 | 14.120 |
| 19 | 0.0813 | 20.426 | 15.020 | 20.798 | 12.012 | 15.904 |
| 19 | 0.0823 | 20.595 | 15.008 | 20.696 | 11.973 | 16.380 |
| 19 | 0.0833 | 24.410 | 13.182 | 17.717 | 12.000 | 10.169 |
| 19 | 0.0843 | 24.490 | 13.150 | 17.454 | 11.319 | 10.302 |
| 19 | 0.0853 | 24.439 | 13.114 | 17.217 | 10.644 | 10.243 |
| 19 | 0.0863 | 25.222 | 14.853 | 17.751 | 9.417  | 9.338  |
| 19 | 0.0873 | 17.013 | 13.240 | 15.964 | 14.667 | 17.907 |
| 19 | 0.0883 | 24.092 | 16.473 | 18.031 | 14.877 | 28.284 |
| 19 | 0.0893 | 18.060 | 10.402 | 16.687 | 14.035 | 20.630 |
| 19 | 0.0903 | 14.021 | 14.172 | 15.918 | 8.133  | 12.082 |
| 19 | 0.0913 | 15.328 | 15.642 | 17.942 | 6.129  | 11.288 |
| 19 | 0.0923 | 15.323 | 15.647 | 17.887 | 6.083  | 11.323 |
| 19 | 0.0933 | 13.056 | 14.414 | 20.317 | 7.958  | 2.494  |
| 19 | 0.0943 | 13.986 | 13.284 | 20.815 | 10.992 | 6.178  |

|    |        |        |        |        |        |        |
|----|--------|--------|--------|--------|--------|--------|
| 19 | 0.0953 | 13.923 | 13.262 | 20.844 | 11.102 | 6.024  |
| 19 | 0.0963 | 23.996 | 20.915 | 20.291 | 18.688 | 32.956 |
| 19 | 0.0973 | 13.513 | 10.818 | 13.018 | 10.656 | 24.746 |
| 19 | 0.0983 | 13.452 | 10.826 | 12.957 | 10.619 | 24.721 |
| 19 | 0.0993 | 8.976  | 8.950  | 12.115 | 13.674 | 20.038 |
| 19 | 0.1003 | 16.180 | 19.176 | 18.267 | 7.287  | 25.846 |
| 19 | 0.1013 | 14.241 | 13.103 | 18.616 | 10.095 | 16.143 |
| 19 | 0.1023 | 16.737 | 15.826 | 12.668 | 6.521  | 36.213 |
| 19 | 0.1033 | 14.083 | 11.505 | 14.699 | 7.218  | 26.084 |
| 19 | 0.1043 | 14.052 | 11.533 | 14.876 | 7.273  | 26.078 |
| 19 | 0.1053 | 18.303 | 17.780 | 20.465 | 6.743  | 8.584  |
| 19 | 0.1063 | 12.542 | 12.092 | 16.835 | 7.887  | 16.035 |
| 19 | 0.1073 | 13.204 | 11.392 | 15.405 | 12.615 | 17.429 |
| 19 | 0.1083 | 14.660 | 9.299  | 15.994 | 12.549 | 12.688 |
| 19 | 0.1093 | 14.732 | 12.463 | 17.866 | 15.118 | 25.981 |
| 19 | 0.1103 | 20.637 | 25.556 | 26.721 | 7.577  | 28.948 |
| 19 | 0.1113 | 11.772 | 10.581 | 15.409 | 6.849  | 13.084 |
| 19 | 0.1123 | 20.257 | 14.110 | 26.830 | 7.420  | 11.930 |
| 19 | 0.1133 | 16.204 | 13.629 | 16.237 | 12.797 | 14.975 |
| 19 | 0.1143 | 19.059 | 12.671 | 16.393 | 20.235 | 15.417 |
| 19 | 0.1153 | 11.758 | 6.878  | 7.571  | 11.859 | 8.976  |
| 19 | 0.1163 | 12.772 | 10.388 | 16.516 | 15.734 | 7.611  |
| 19 | 0.1173 | 13.242 | 10.323 | 13.441 | 12.479 | 8.210  |
| 19 | 0.1183 | 8.010  | 5.516  | 9.054  | 16.123 | 7.055  |
| 19 | 0.1193 | 15.824 | 7.543  | 14.735 | 25.801 | 7.025  |
| 19 | 0.1203 | 6.750  | 6.239  | 6.595  | 16.689 | 11.929 |
| 19 | 0.1213 | 6.132  | 2.734  | 3.305  | 7.763  | 10.579 |
| 19 | 0.1223 | 13.228 | 6.034  | 14.892 | 15.895 | 19.088 |
| 19 | 0.1233 | 10.788 | 12.118 | 16.700 | 12.379 | 8.681  |
| 19 | 0.1243 | 11.343 | 15.678 | 17.383 | 8.419  | 14.595 |
| 19 | 0.1253 | 10.041 | 14.767 | 16.825 | 10.013 | 12.263 |
| 19 | 0.1263 | 14.181 | 8.279  | 7.796  | 7.058  | 7.713  |
| 19 | 0.1273 | 6.642  | 12.253 | 5.914  | 12.413 | 10.248 |
| 19 | 0.1283 | 12.028 | 11.029 | 12.128 | 13.644 | 8.972  |
| 19 | 0.1293 | 16.332 | 16.632 | 19.478 | 11.185 | 4.765  |
| 19 | 0.1303 | 10.885 | 8.388  | 8.279  | 22.356 | 11.223 |
| 19 | 0.1313 | 11.764 | 7.496  | 12.403 | 16.732 | 10.031 |
| 19 | 0.1323 | 17.117 | 18.050 | 17.253 | 12.450 | 9.366  |
| 19 | 0.1333 | 9.255  | 9.854  | 7.390  | 19.621 | 17.597 |
| 19 | 0.1343 | 17.921 | 10.887 | 11.714 | 17.962 | 7.005  |
| 19 | 0.1353 | 11.937 | 7.970  | 13.669 | 12.337 | 5.690  |
| 19 | 0.1363 | 5.359  | 8.246  | 5.051  | 15.067 | 10.253 |
| 19 | 0.1373 | 5.304  | 8.078  | 4.943  | 14.968 | 10.240 |
| 19 | 0.1383 | 21.578 | 12.788 | 20.272 | 22.908 | 21.070 |
| 19 | 0.1393 | 24.576 | 13.552 | 16.510 | 8.255  | 17.526 |
| 19 | 0.1403 | 16.710 | 13.078 | 11.509 | 8.664  | 7.634  |
| 19 | 0.1413 | 8.681  | 15.591 | 12.700 | 13.611 | 4.190  |
| 19 | 0.1423 | 12.568 | 20.423 | 15.007 | 28.162 | 12.573 |
| 19 | 0.1433 | 5.234  | 12.591 | 7.439  | 16.958 | 5.542  |
| 19 | 0.1443 | 17.491 | 17.316 | 15.388 | 27.057 | 12.995 |

|    |        |        |        |        |        |        |
|----|--------|--------|--------|--------|--------|--------|
| 19 | 0.1453 | 17.852 | 8.728  | 18.983 | 18.116 | 10.903 |
| 19 | 0.1463 | 19.150 | 11.010 | 12.568 | 24.144 | 20.805 |
| 19 | 0.1473 | 24.488 | 23.153 | 24.246 | 21.111 | 11.875 |
| 19 | 0.1483 | 21.788 | 26.350 | 25.083 | 15.070 | 8.615  |
| 19 | 0.1493 | 16.850 | 22.088 | 17.737 | 24.844 | 13.354 |
| 19 | 0.1503 | 14.879 | 18.065 | 13.940 | 30.697 | 8.394  |
| 19 | 0.1513 | 10.805 | 12.663 | 9.269  | 15.948 | 8.172  |
| 19 | 0.1523 | 27.317 | 19.340 | 23.775 | 19.536 | 20.859 |
| 19 | 0.1533 | 18.532 | 11.842 | 16.615 | 9.466  | 7.427  |
| 19 | 0.1543 | 19.260 | 17.468 | 24.733 | 15.578 | 10.621 |
| 19 | 0.1553 | 22.269 | 20.274 | 20.235 | 26.217 | 19.502 |
| 19 | 0.1563 | 26.222 | 16.981 | 22.655 | 19.906 | 11.400 |
| 19 | 0.1573 | 14.078 | 10.588 | 13.755 | 18.317 | 7.372  |
| 19 | 0.1583 | 21.733 | 13.584 | 18.029 | 18.745 | 15.548 |
| 19 | 0.1593 | 23.115 | 17.959 | 23.211 | 23.473 | 14.094 |
| 19 | 0.1603 | 13.408 | 18.856 | 19.747 | 6.073  | 7.062  |
| 19 | 0.1613 | 32.189 | 28.637 | 23.045 | 19.373 | 22.471 |
| 19 | 0.1623 | 30.968 | 20.931 | 27.964 | 10.371 | 20.061 |
| 19 | 0.1633 | 26.437 | 17.204 | 20.010 | 19.182 | 15.777 |
| 19 | 0.1643 | 30.377 | 22.556 | 19.096 | 13.579 | 13.087 |
| 19 | 0.1653 | 13.177 | 10.419 | 11.287 | 17.648 | 13.017 |
| 19 | 0.1663 | 20.075 | 17.989 | 21.229 | 13.739 | 12.434 |
| 19 | 0.1673 | 24.755 | 14.545 | 22.147 | 16.131 | 24.671 |
| 19 | 0.1683 | 26.263 | 18.993 | 25.127 | 18.802 | 11.493 |
| 19 | 0.1693 | 28.566 | 24.437 | 27.170 | 16.864 | 12.436 |
| 19 | 0.1703 | 22.069 | 12.544 | 16.731 | 25.924 | 13.635 |
| 19 | 0.1713 | 18.633 | 16.128 | 16.603 | 18.191 | 10.442 |
| 19 | 0.1723 | 17.159 | 17.595 | 15.549 | 14.852 | 8.734  |
| 19 | 0.1733 | 19.864 | 14.314 | 14.371 | 9.605  | 16.138 |
| 19 | 0.1743 | 19.992 | 14.112 | 15.350 | 6.139  | 14.782 |
| 19 | 0.1753 | 17.046 | 16.592 | 14.222 | 8.302  | 18.349 |
| 19 | 0.1763 | 18.136 | 12.934 | 15.563 | 7.585  | 13.412 |
| 19 | 0.1773 | 13.635 | 7.795  | 10.097 | 13.989 | 11.271 |
| 19 | 0.1783 | 18.482 | 13.666 | 17.607 | 16.496 | 17.543 |
| 19 | 0.1793 | 11.725 | 9.427  | 9.394  | 12.707 | 14.800 |
| 19 | 0.1803 | 14.021 | 14.320 | 12.519 | 15.505 | 13.288 |
| 19 | 0.1813 | 7.390  | 3.284  | 8.432  | 6.960  | 9.141  |
| 19 | 0.1823 | 7.404  | 3.283  | 8.414  | 6.945  | 9.070  |
| 19 | 0.1833 | 6.555  | 7.905  | 7.464  | 11.218 | 18.811 |
| 19 | 0.1843 | 22.183 | 15.645 | 21.419 | 9.052  | 11.711 |
| 19 | 0.1853 | 32.975 | 25.124 | 34.799 | 10.249 | 11.049 |
| 19 | 0.1863 | 18.933 | 15.205 | 19.020 | 7.803  | 12.734 |
| 19 | 0.1873 | 19.737 | 16.424 | 19.137 | 6.089  | 6.705  |
| 19 | 0.1883 | 25.238 | 19.352 | 32.333 | 10.511 | 20.128 |
| 19 | 0.1893 | 31.607 | 21.834 | 35.164 | 23.370 | 12.222 |
| 19 | 0.1903 | 20.576 | 9.574  | 23.815 | 14.527 | 19.061 |
| 19 | 0.1913 | 23.351 | 21.896 | 31.055 | 8.788  | 13.450 |
| 19 | 0.1923 | 23.524 | 24.317 | 36.810 | 10.204 | 14.900 |
| 19 | 0.1933 | 22.091 | 18.547 | 27.640 | 5.280  | 12.631 |
| 19 | 0.1943 | 19.153 | 15.600 | 28.127 | 13.201 | 9.790  |

|    |        |        |        |        |        |        |
|----|--------|--------|--------|--------|--------|--------|
| 19 | 0.1953 | 13.896 | 8.909  | 23.325 | 15.712 | 16.017 |
| 19 | 0.1963 | 12.507 | 9.802  | 23.757 | 13.368 | 15.173 |
| 19 | 0.1973 | 12.594 | 12.722 | 22.757 | 17.007 | 28.422 |
| 19 | 0.1983 | 31.561 | 22.004 | 41.242 | 15.143 | 22.747 |
| 19 | 0.1993 | 30.718 | 24.595 | 44.845 | 13.794 | 17.440 |
| 19 | 0.2003 | 30.468 | 23.005 | 39.774 | 21.430 | 11.007 |
| 19 | 0.2013 | 28.431 | 20.642 | 28.524 | 25.021 | 20.934 |
| 19 | 0.2023 | 28.457 | 20.625 | 28.541 | 25.025 | 21.013 |
| 19 | 0.2033 | 18.810 | 15.573 | 17.892 | 14.626 | 17.557 |
| 19 | 0.2043 | 22.542 | 18.533 | 20.379 | 11.671 | 24.806 |
| 19 | 0.2053 | 19.202 | 12.102 | 20.704 | 7.168  | 15.604 |
| 19 | 0.2063 | 22.533 | 16.875 | 31.102 | 13.702 | 7.458  |
| 19 | 0.2073 | 18.905 | 12.966 | 18.122 | 13.198 | 20.463 |
| 19 | 0.2083 | 22.660 | 18.760 | 26.770 | 7.971  | 16.069 |
| 19 | 0.2093 | 26.764 | 21.483 | 35.493 | 12.901 | 17.868 |
| 19 | 0.2103 | 26.311 | 18.267 | 37.908 | 15.043 | 12.233 |
| 19 | 0.2113 | 11.254 | 9.372  | 14.354 | 20.024 | 19.082 |
| 19 | 0.2123 | 31.352 | 26.510 | 33.607 | 12.706 | 9.979  |
| 19 | 0.2133 | 25.132 | 13.144 | 35.031 | 15.746 | 14.911 |
| 19 | 0.2143 | 26.549 | 15.444 | 42.967 | 19.667 | 21.927 |
| 19 | 0.2153 | 17.326 | 15.769 | 18.711 | 14.501 | 14.209 |
| 19 | 0.2163 | 20.964 | 22.343 | 27.627 | 20.830 | 18.045 |
| 19 | 0.2173 | 31.479 | 23.591 | 33.330 | 12.608 | 23.821 |
| 19 | 0.2183 | 25.635 | 23.044 | 35.328 | 11.486 | 15.731 |
| 19 | 0.2193 | 31.514 | 29.850 | 44.139 | 11.368 | 18.631 |
| 19 | 0.2203 | 24.013 | 36.182 | 33.601 | 13.379 | 9.622  |
| 19 | 0.2213 | 35.548 | 46.680 | 48.734 | 25.573 | 18.919 |
| 19 | 0.2223 | 35.931 | 38.221 | 40.722 | 12.915 | 6.694  |
| 19 | 0.2233 | 29.630 | 31.743 | 38.048 | 15.146 | 17.267 |
| 19 | 0.2243 | 29.357 | 27.015 | 42.500 | 18.255 | 20.364 |
| 19 | 0.2253 | 39.799 | 40.006 | 40.431 | 15.843 | 23.039 |
| 19 | 0.2263 | 26.963 | 19.884 | 33.128 | 18.233 | 8.495  |
| 19 | 0.2273 | 26.936 | 15.891 | 33.187 | 12.358 | 12.948 |
| 19 | 0.2283 | 26.396 | 16.123 | 29.979 | 11.409 | 10.675 |
| 19 | 0.2293 | 38.178 | 24.852 | 42.222 | 12.967 | 11.187 |
| 19 | 0.2303 | 32.340 | 21.931 | 40.126 | 5.564  | 1.962  |
| 19 | 0.2313 | 34.049 | 24.913 | 41.220 | 6.975  | 3.090  |
| 19 | 0.2323 | 31.433 | 30.260 | 37.733 | 7.670  | 20.917 |
| 19 | 0.2333 | 44.992 | 35.575 | 48.021 | 10.908 | 13.945 |
| 19 | 0.2343 | 35.970 | 29.313 | 45.072 | 17.546 | 20.871 |
| 19 | 0.2353 | 13.388 | 14.727 | 14.720 | 6.573  | 20.978 |
| 19 | 0.2363 | 24.916 | 24.226 | 25.993 | 11.747 | 14.825 |
| 19 | 0.2373 | 21.003 | 17.594 | 34.635 | 19.460 | 18.794 |
| 19 | 0.2383 | 20.841 | 17.441 | 34.886 | 19.470 | 18.729 |
| 19 | 0.2393 | 27.822 | 14.238 | 33.018 | 27.714 | 25.478 |
| 19 | 0.2403 | 26.692 | 17.817 | 31.805 | 17.058 | 9.150  |
| 19 | 0.2413 | 22.857 | 12.114 | 22.710 | 7.037  | 5.063  |
| 19 | 0.2423 | 28.952 | 14.274 | 25.223 | 19.739 | 20.790 |
| 19 | 0.2433 | 33.394 | 24.355 | 35.117 | 14.159 | 15.602 |
| 19 | 0.2443 | 41.600 | 25.964 | 41.940 | 16.860 | 20.254 |

|    |        |        |        |        |        |        |
|----|--------|--------|--------|--------|--------|--------|
| 19 | 0.2453 | 40.092 | 28.417 | 51.239 | 23.048 | 20.447 |
| 19 | 0.2463 | 46.417 | 34.344 | 52.153 | 24.434 | 26.892 |
| 19 | 0.2473 | 43.128 | 25.653 | 50.965 | 14.860 | 22.502 |
| 19 | 0.2483 | 41.185 | 32.215 | 43.054 | 18.700 | 22.912 |
| 19 | 0.2493 | 35.527 | 31.856 | 44.442 | 23.872 | 18.032 |
| 19 | 0.2503 | 44.207 | 32.270 | 52.871 | 21.309 | 17.133 |
| 19 | 0.2513 | 33.755 | 28.658 | 38.961 | 18.378 | 22.416 |
| 19 | 0.2523 | 38.167 | 36.485 | 45.371 | 16.274 | 23.003 |
| 19 | 0.2533 | 24.505 | 31.156 | 32.399 | 6.729  | 13.230 |
| 19 | 0.2543 | 20.364 | 19.879 | 28.320 | 8.381  | 12.716 |
| 19 | 0.2553 | 39.817 | 31.042 | 48.286 | 18.417 | 15.760 |
| 19 | 0.2563 | 41.145 | 30.738 | 51.468 | 18.053 | 18.409 |
| 19 | 0.2573 | 41.763 | 34.784 | 54.311 | 17.501 | 20.969 |
| 19 | 0.2583 | 45.409 | 40.329 | 57.343 | 14.862 | 19.921 |
| 19 | 0.2593 | 41.229 | 33.631 | 52.998 | 13.349 | 17.493 |
| 19 | 0.2603 | 31.888 | 23.782 | 33.679 | 6.369  | 10.995 |
| 19 | 0.2613 | 40.566 | 31.936 | 50.455 | 26.629 | 21.130 |
| 19 | 0.2623 | 32.040 | 22.368 | 38.143 | 12.794 | 7.293  |
| 19 | 0.2633 | 36.794 | 27.080 | 44.691 | 14.814 | 6.215  |
| 19 | 0.2643 | 36.258 | 23.563 | 44.371 | 24.033 | 14.719 |
| 19 | 0.2653 | 36.264 | 23.572 | 44.390 | 24.045 | 14.732 |
| 19 | 0.2663 | 27.473 | 22.767 | 37.320 | 17.905 | 16.067 |
| 19 | 0.2673 | 22.320 | 27.761 | 41.659 | 13.081 | 11.811 |
| 19 | 0.2683 | 40.726 | 33.595 | 51.658 | 9.852  | 15.304 |
| 19 | 0.2693 | 36.288 | 23.495 | 40.113 | 20.154 | 38.378 |
| 19 | 0.2703 | 23.466 | 16.064 | 29.338 | 18.858 | 16.311 |
| 19 | 0.2713 | 26.964 | 20.390 | 31.503 | 18.667 | 26.317 |
| 19 | 0.2723 | 19.729 | 19.384 | 15.292 | 22.046 | 30.644 |
| 19 | 0.2733 | 15.913 | 17.761 | 9.516  | 22.967 | 15.017 |
| 19 | 0.2743 | 22.280 | 20.427 | 21.665 | 15.888 | 21.942 |
| 19 | 0.2753 | 17.545 | 20.293 | 23.452 | 19.140 | 18.181 |
| 19 | 0.2763 | 44.342 | 35.029 | 52.215 | 20.032 | 18.624 |
| 19 | 0.2773 | 39.388 | 24.004 | 47.282 | 20.340 | 15.838 |
| 19 | 0.2783 | 41.460 | 28.244 | 54.812 | 20.505 | 22.075 |
| 19 | 0.2793 | 24.910 | 23.950 | 31.089 | 10.466 | 14.801 |
| 19 | 0.2803 | 24.302 | 23.098 | 29.158 | 9.727  | 6.204  |
| 19 | 0.2813 | 27.985 | 29.592 | 34.509 | 22.478 | 13.940 |
| 19 | 0.2823 | 34.802 | 29.072 | 35.615 | 21.574 | 22.155 |
| 19 | 0.2833 | 41.180 | 34.636 | 43.345 | 20.849 | 24.361 |
| 19 | 0.2843 | 33.960 | 30.372 | 40.533 | 15.729 | 18.530 |
| 19 | 0.2853 | 36.404 | 29.215 | 37.464 | 23.256 | 28.688 |
| 19 | 0.2863 | 26.212 | 25.569 | 30.742 | 12.357 | 14.777 |
| 19 | 0.2873 | 30.305 | 24.034 | 34.438 | 14.837 | 17.566 |
| 19 | 0.2883 | 30.826 | 25.673 | 40.332 | 12.904 | 15.912 |
| 19 | 0.2893 | 21.087 | 20.516 | 21.787 | 22.800 | 21.761 |
| 19 | 0.2903 | 29.323 | 16.584 | 22.067 | 30.002 | 19.174 |
| 19 | 0.2913 | 15.951 | 7.500  | 13.010 | 15.980 | 17.698 |
| 19 | 0.2923 | 25.388 | 15.462 | 20.941 | 18.839 | 16.925 |
| 19 | 0.2933 | 27.474 | 18.170 | 24.248 | 29.473 | 25.980 |
| 19 | 0.2943 | 13.202 | 18.273 | 16.529 | 26.637 | 15.086 |

|    |        |        |        |        |        |        |
|----|--------|--------|--------|--------|--------|--------|
| 19 | 0.2953 | 16.752 | 19.138 | 22.637 | 17.509 | 12.453 |
| 19 | 0.2963 | 23.071 | 18.756 | 26.950 | 15.201 | 18.638 |
| 19 | 0.2973 | 29.017 | 25.729 | 27.774 | 19.843 | 18.608 |
| 19 | 0.2983 | 21.932 | 24.034 | 25.511 | 20.896 | 5.951  |
| 19 | 0.2993 | 20.548 | 16.502 | 13.350 | 22.473 | 8.908  |
| 19 | 0.3003 | 27.055 | 19.231 | 25.231 | 17.046 | 5.858  |
| 19 | 0.3013 | 21.260 | 17.568 | 23.218 | 10.514 | 14.149 |
| 19 | 0.3023 | 20.078 | 25.295 | 26.511 | 11.156 | 22.164 |
| 19 | 0.3033 | 12.100 | 9.912  | 8.099  | 21.635 | 17.977 |
| 19 | 0.3043 | 9.318  | 11.941 | 10.530 | 18.621 | 20.050 |
| 19 | 0.3053 | 10.773 | 10.723 | 5.259  | 24.604 | 20.396 |
| 19 | 0.3063 | 24.387 | 16.336 | 21.886 | 18.329 | 18.924 |
| 19 | 0.3073 | 30.851 | 21.389 | 27.845 | 30.296 | 16.437 |
| 19 | 0.3083 | 26.038 | 16.735 | 23.677 | 25.660 | 20.346 |
| 19 | 0.3093 | 30.577 | 20.782 | 28.328 | 28.381 | 18.351 |
| 19 | 0.3103 | 18.865 | 20.150 | 24.976 | 14.266 | 3.700  |
| 19 | 0.3113 | 22.300 | 18.365 | 18.224 | 19.425 | 8.925  |
| 19 | 0.3123 | 22.575 | 14.591 | 22.245 | 22.756 | 22.697 |
| 19 | 0.3133 | 16.743 | 11.585 | 22.967 | 20.634 | 11.076 |
| 19 | 0.3143 | 20.470 | 19.234 | 27.273 | 22.758 | 4.485  |
| 19 | 0.3153 | 11.965 | 14.223 | 14.488 | 17.767 | 3.172  |
| 19 | 0.3163 | 3.612  | 9.200  | 6.985  | 20.338 | 16.462 |
| 19 | 0.3173 | 5.362  | 10.470 | 5.318  | 25.868 | 8.148  |
| 19 | 0.3183 | 21.672 | 12.679 | 18.198 | 31.308 | 29.649 |
| 19 | 0.3193 | 17.663 | 11.463 | 14.809 | 26.377 | 17.859 |
| 19 | 0.3203 | 17.045 | 21.738 | 21.129 | 35.015 | 15.949 |
| 19 | 0.3213 | 32.268 | 27.730 | 30.154 | 22.805 | 14.973 |
| 19 | 0.3223 | 24.574 | 20.830 | 26.454 | 18.009 | 13.092 |
| 19 | 0.3233 | 21.535 | 23.683 | 23.675 | 16.491 | 8.754  |
| 19 | 0.3243 | 21.106 | 19.032 | 20.671 | 16.438 | 6.103  |
| 19 | 0.3253 | 6.561  | 4.002  | 5.687  | 4.970  | 4.874  |
| 19 | 0.3263 | 10.840 | 12.706 | 11.309 | 9.139  | 7.951  |
| 19 | 0.3273 | 15.727 | 12.141 | 12.646 | 17.245 | 10.141 |
| 19 | 0.3283 | 11.476 | 8.432  | 11.809 | 21.374 | 16.062 |
| 19 | 0.3293 | 22.459 | 14.545 | 24.097 | 20.078 | 10.472 |
| 19 | 0.3303 | 23.792 | 13.936 | 24.485 | 26.876 | 13.461 |
| 19 | 0.3313 | 22.623 | 24.828 | 33.632 | 36.097 | 20.233 |
| 19 | 0.3323 | 27.628 | 25.022 | 35.385 | 31.061 | 19.353 |
| 19 | 0.3333 | 18.724 | 15.444 | 16.062 | 26.299 | 8.051  |
| 19 | 0.3343 | 21.430 | 18.328 | 28.784 | 20.585 | 12.603 |
| 19 | 0.3353 | 18.006 | 15.419 | 24.880 | 15.084 | 5.957  |
| 19 | 0.3363 | 17.303 | 13.950 | 23.451 | 20.092 | 5.340  |
| 19 | 0.3373 | 8.161  | 7.787  | 9.223  | 23.230 | 10.131 |
| 19 | 0.3383 | 21.392 | 15.736 | 26.332 | 12.050 | 9.920  |
| 19 | 0.3393 | 18.308 | 17.628 | 18.062 | 19.972 | 6.671  |
| 19 | 0.3403 | 23.931 | 19.034 | 23.707 | 15.154 | 7.408  |
| 19 | 0.3413 | 16.933 | 13.355 | 15.640 | 13.398 | 6.488  |
| 19 | 0.3423 | 22.172 | 19.824 | 27.011 | 14.472 | 9.232  |
| 19 | 0.3433 | 14.570 | 9.994  | 19.042 | 10.948 | 8.272  |
| 19 | 0.3443 | 12.745 | 11.359 | 16.781 | 13.362 | 8.890  |

|    |        |        |        |        |        |        |
|----|--------|--------|--------|--------|--------|--------|
| 19 | 0.3453 | 22.442 | 20.196 | 24.697 | 21.667 | 13.487 |
| 19 | 0.3463 | 25.774 | 19.279 | 28.715 | 23.110 | 17.792 |
| 19 | 0.3473 | 12.780 | 14.323 | 20.349 | 16.222 | 8.022  |
| 19 | 0.3483 | 16.106 | 15.253 | 20.138 | 19.050 | 16.136 |
| 19 | 0.3493 | 18.209 | 12.715 | 22.804 | 22.790 | 19.194 |
| 19 | 0.3503 | 12.402 | 9.869  | 14.106 | 19.071 | 8.246  |
| 19 | 0.3513 | 7.295  | 9.378  | 10.430 | 20.477 | 12.934 |
| 19 | 0.3523 | 13.010 | 17.887 | 20.480 | 20.588 | 7.786  |
| 19 | 0.3533 | 31.108 | 24.422 | 26.633 | 25.305 | 9.671  |
| 19 | 0.3543 | 20.463 | 5.020  | 12.947 | 25.797 | 18.061 |
| 19 | 0.3553 | 6.816  | 8.281  | 11.295 | 19.821 | 9.732  |
| 19 | 0.3563 | 13.507 | 12.131 | 10.968 | 20.287 | 16.883 |
| 19 | 0.3573 | 6.388  | 11.719 | 7.597  | 18.970 | 15.619 |
| 19 | 0.3583 | 6.396  | 11.730 | 7.613  | 18.964 | 15.622 |
| 19 | 0.3593 | 8.267  | 13.510 | 11.741 | 19.769 | 10.934 |
| 19 | 0.3603 | 22.439 | 19.376 | 27.119 | 14.565 | 6.193  |
| 19 | 0.3613 | 18.548 | 14.243 | 18.936 | 26.524 | 11.745 |
| 19 | 0.3623 | 26.953 | 31.704 | 28.050 | 36.486 | 13.115 |
| 19 | 0.3633 | 14.513 | 18.230 | 15.887 | 30.405 | 18.189 |
| 19 | 0.3643 | 19.360 | 19.190 | 21.310 | 18.126 | 14.550 |
| 19 | 0.3653 | 17.929 | 14.384 | 20.317 | 16.436 | 18.813 |
| 19 | 0.3663 | 13.227 | 19.964 | 16.709 | 21.951 | 14.235 |
| 19 | 0.3673 | 13.548 | 19.362 | 19.114 | 32.576 | 11.196 |
| 19 | 0.3683 | 14.948 | 19.036 | 15.732 | 25.905 | 14.272 |
| 19 | 0.3693 | 21.506 | 21.016 | 18.340 | 27.157 | 11.896 |
| 19 | 0.3703 | 21.440 | 21.002 | 18.190 | 27.415 | 11.929 |
| 19 | 0.3713 | 14.487 | 21.016 | 17.084 | 24.338 | 16.360 |
| 19 | 0.3723 | 8.790  | 18.424 | 13.076 | 28.519 | 12.445 |
| 19 | 0.3733 | 11.218 | 22.052 | 12.694 | 13.392 | 16.384 |
| 19 | 0.3743 | 22.810 | 32.694 | 26.676 | 30.720 | 24.747 |
| 19 | 0.3753 | 4.802  | 10.881 | 14.174 | 25.412 | 23.077 |
| 19 | 0.3763 | 11.787 | 10.848 | 21.340 | 9.660  | 22.556 |
| 19 | 0.3773 | 10.003 | 12.348 | 15.492 | 18.244 | 22.085 |
| 19 | 0.3783 | 11.892 | 13.927 | 14.446 | 37.282 | 17.532 |
| 19 | 0.3793 | 13.052 | 16.826 | 21.837 | 9.482  | 6.351  |
| 19 | 0.3803 | 9.469  | 12.462 | 12.374 | 6.778  | 11.829 |
| 19 | 0.3813 | 12.540 | 12.088 | 12.131 | 4.348  | 8.164  |
| 19 | 0.3823 | 13.730 | 15.253 | 17.815 | 16.073 | 12.003 |
| 19 | 0.3833 | 8.481  | 13.111 | 17.384 | 20.972 | 19.186 |
| 19 | 0.3843 | 8.299  | 10.167 | 11.724 | 8.574  | 15.575 |
| 19 | 0.3853 | 13.919 | 23.164 | 18.588 | 17.771 | 7.744  |
| 19 | 0.3863 | 26.919 | 24.129 | 32.290 | 31.992 | 10.443 |
| 19 | 0.3873 | 15.747 | 19.755 | 24.113 | 31.622 | 10.325 |
| 19 | 0.3883 | 16.139 | 17.342 | 19.856 | 27.840 | 15.783 |
| 19 | 0.3893 | 25.553 | 12.314 | 22.260 | 38.172 | 26.550 |
| 19 | 0.3903 | 10.261 | 7.637  | 10.856 | 10.615 | 6.462  |
| 19 | 0.3913 | 14.116 | 8.958  | 21.595 | 16.409 | 5.003  |
| 19 | 0.3923 | 8.559  | 18.831 | 15.469 | 44.006 | 17.364 |
| 19 | 0.3933 | 5.740  | 12.734 | 5.400  | 27.512 | 11.466 |
| 19 | 0.3943 | 11.056 | 12.115 | 14.578 | 10.886 | 5.388  |

|    |        |        |        |        |        |        |
|----|--------|--------|--------|--------|--------|--------|
| 19 | 0.3953 | 14.924 | 15.086 | 20.595 | 31.950 | 12.094 |
| 19 | 0.3963 | 11.357 | 7.424  | 11.239 | 27.776 | 14.634 |
| 19 | 0.3973 | 18.650 | 14.249 | 20.177 | 26.592 | 16.268 |
| 19 | 0.3983 | 9.747  | 15.580 | 15.859 | 13.689 | 11.541 |
| 19 | 0.3993 | 14.966 | 18.414 | 21.071 | 24.091 | 14.121 |
| 19 | 0.4003 | 18.613 | 15.158 | 21.562 | 27.504 | 20.116 |
| 19 | 0.4013 | 29.617 | 17.002 | 24.942 | 38.202 | 20.042 |
| 19 | 0.4023 | 22.217 | 17.384 | 22.025 | 25.981 | 29.582 |
| 19 | 0.4033 | 17.887 | 12.206 | 17.960 | 24.168 | 22.184 |
| 19 | 0.4043 | 21.703 | 21.898 | 18.533 | 16.747 | 23.141 |
| 19 | 0.4053 | 8.545  | 10.917 | 8.662  | 24.646 | 8.744  |
| 19 | 0.4063 | 13.301 | 26.644 | 18.257 | 37.051 | 24.682 |
| 19 | 0.4073 | 14.177 | 27.340 | 21.573 | 32.692 | 19.812 |
| 19 | 0.4083 | 10.706 | 24.862 | 21.875 | 38.466 | 12.439 |
| 19 | 0.4093 | 10.794 | 22.560 | 14.146 | 34.083 | 19.321 |
| 19 | 0.4103 | 14.533 | 30.725 | 23.224 | 24.064 | 15.289 |
| 19 | 0.4113 | 14.662 | 20.024 | 17.429 | 28.823 | 36.232 |
| 19 | 0.4123 | 16.002 | 14.587 | 21.913 | 19.024 | 18.234 |
| 19 | 0.4133 | 13.531 | 17.003 | 18.961 | 23.767 | 18.676 |
| 19 | 0.4143 | 15.385 | 13.372 | 13.897 | 15.915 | 24.990 |
| 19 | 0.4153 | 11.838 | 29.061 | 25.953 | 34.636 | 19.644 |
| 19 | 0.4163 | 9.793  | 17.516 | 13.933 | 15.320 | 18.090 |
| 19 | 0.4173 | 2.532  | 5.172  | 6.909  | 17.263 | 10.701 |
| 19 | 0.4183 | 2.527  | 5.159  | 6.823  | 17.274 | 10.779 |
| 19 | 0.4193 | 2.112  | 5.117  | 6.158  | 19.684 | 17.117 |
| 19 | 0.4203 | 5.996  | 7.430  | 9.653  | 25.980 | 20.356 |
| 19 | 0.4213 | 5.981  | 7.424  | 9.688  | 26.009 | 20.336 |
| 19 | 0.4223 | 9.656  | 10.541 | 8.147  | 16.938 | 12.954 |
| 19 | 0.4233 | 6.561  | 5.939  | 9.539  | 18.575 | 10.467 |
| 19 | 0.4243 | 8.283  | 11.467 | 13.478 | 18.728 | 6.874  |
| 19 | 0.4253 | 10.252 | 9.588  | 9.686  | 8.505  | 11.857 |
| 19 | 0.4263 | 6.584  | 16.030 | 9.970  | 19.794 | 8.189  |
| 19 | 0.4273 | 26.555 | 16.906 | 27.413 | 32.542 | 12.189 |
| 19 | 0.4283 | 14.100 | 11.074 | 18.527 | 22.954 | 8.524  |
| 19 | 0.4293 | 10.139 | 7.657  | 15.152 | 17.401 | 7.965  |
| 19 | 0.4303 | 6.673  | 8.812  | 7.714  | 18.050 | 9.203  |
| 19 | 0.4313 | 4.438  | 6.988  | 5.470  | 13.048 | 11.574 |
| 19 | 0.4323 | 10.607 | 10.510 | 12.588 | 18.038 | 13.111 |
| 19 | 0.4333 | 13.651 | 11.817 | 19.226 | 23.644 | 11.109 |
| 19 | 0.4343 | 15.085 | 17.782 | 20.068 | 34.673 | 6.657  |
| 19 | 0.4353 | 17.178 | 13.158 | 17.145 | 22.919 | 8.521  |
| 19 | 0.4363 | 14.237 | 16.198 | 15.804 | 17.650 | 10.997 |
| 19 | 0.4373 | 20.406 | 21.086 | 25.251 | 16.963 | 13.553 |
| 19 | 0.4383 | 25.669 | 19.162 | 24.768 | 17.476 | 9.390  |
| 19 | 0.4393 | 16.303 | 15.954 | 16.698 | 39.934 | 12.772 |
| 19 | 0.4403 | 31.870 | 23.727 | 30.856 | 35.244 | 18.535 |
| 19 | 0.4413 | 28.309 | 28.624 | 29.966 | 25.222 | 12.182 |
| 19 | 0.4423 | 7.307  | 4.681  | 7.521  | 11.806 | 8.503  |
| 19 | 0.4433 | 20.070 | 11.578 | 18.160 | 19.109 | 6.397  |
| 19 | 0.4443 | 29.038 | 14.546 | 21.123 | 22.567 | 10.813 |



|    |        |        |        |        |        |        |
|----|--------|--------|--------|--------|--------|--------|
| 19 | 0.4453 | 24.281 | 19.692 | 21.131 | 24.202 | 14.465 |
| 19 | 0.4463 | 23.616 | 23.842 | 19.716 | 17.226 | 20.377 |
| 19 | 0.4473 | 28.468 | 18.188 | 28.866 | 19.520 | 14.609 |
| 19 | 0.4483 | 10.413 | 7.677  | 9.400  | 15.082 | 10.899 |
| 19 | 0.4493 | 9.991  | 12.571 | 13.074 | 31.481 | 7.975  |
| 19 | 0.4503 | 13.567 | 13.883 | 14.015 | 16.747 | 18.156 |
| 19 | 0.4513 | 15.186 | 17.081 | 18.811 | 18.530 | 16.145 |
| 19 | 0.4523 | 13.140 | 18.060 | 15.043 | 21.939 | 6.548  |
| 19 | 0.4533 | 10.938 | 10.583 | 9.510  | 14.569 | 5.330  |
| 19 | 0.4543 | 11.054 | 13.535 | 11.474 | 27.522 | 3.168  |
| 19 | 0.4553 | 3.833  | 5.719  | 2.337  | 6.756  | 6.351  |
| 19 | 0.4563 | 8.321  | 14.102 | 7.714  | 17.706 | 7.202  |
| 19 | 0.4573 | 10.451 | 8.415  | 10.619 | 21.077 | 4.652  |
| 19 | 0.4583 | 10.155 | 22.239 | 12.764 | 15.877 | 5.395  |
| 19 | 0.4593 | 29.677 | 19.575 | 30.217 | 36.400 | 11.624 |
| 19 | 0.4603 | 13.525 | 14.523 | 10.490 | 25.061 | 12.392 |
| 19 | 0.4613 | 27.464 | 28.177 | 29.838 | 22.541 | 6.991  |
| 19 | 0.4623 | 14.059 | 14.724 | 17.412 | 27.817 | 10.762 |
| 19 | 0.4633 | 20.435 | 17.175 | 24.392 | 8.512  | 11.510 |
| 19 | 0.4643 | 16.771 | 15.872 | 18.608 | 30.180 | 21.941 |
| 19 | 0.4653 | 13.762 | 17.322 | 15.155 | 30.441 | 20.949 |
| 19 | 0.4663 | 24.011 | 25.203 | 24.716 | 27.885 | 22.987 |
| 19 | 0.4673 | 24.115 | 19.491 | 25.520 | 27.345 | 20.121 |
| 19 | 0.4683 | 18.689 | 9.332  | 21.016 | 30.528 | 15.952 |
| 19 | 0.4693 | 20.601 | 6.777  | 13.480 | 18.513 | 14.363 |
| 19 | 0.4703 | 17.577 | 5.107  | 14.150 | 16.826 | 15.356 |
| 19 | 0.4713 | 16.020 | 16.257 | 16.423 | 18.495 | 4.041  |
| 19 | 0.4723 | 17.493 | 19.375 | 24.406 | 19.070 | 13.396 |
| 19 | 0.4733 | 20.417 | 17.337 | 23.135 | 21.902 | 19.321 |
| 19 | 0.4743 | 20.802 | 18.950 | 18.822 | 19.795 | 19.179 |
| 19 | 0.4753 | 14.959 | 18.384 | 19.351 | 31.472 | 13.643 |
| 19 | 0.4763 | 9.588  | 6.461  | 10.867 | 24.334 | 15.190 |
| 19 | 0.4773 | 18.491 | 12.509 | 22.417 | 32.534 | 26.656 |
| 19 | 0.4783 | 10.779 | 8.912  | 14.509 | 10.678 | 4.133  |
| 19 | 0.4793 | 11.587 | 9.684  | 7.352  | 16.075 | 9.103  |
| 19 | 0.4803 | 19.836 | 20.334 | 22.406 | 34.745 | 18.438 |
| 19 | 0.4813 | 11.050 | 8.628  | 12.421 | 20.969 | 11.634 |
| 19 | 0.4823 | 17.579 | 19.763 | 19.975 | 34.426 | 21.918 |
| 19 | 0.4833 | 17.547 | 20.050 | 19.987 | 34.640 | 22.017 |
| 19 | 0.4843 | 27.206 | 17.992 | 25.568 | 18.361 | 28.179 |
| 19 | 0.4853 | 37.028 | 28.159 | 28.045 | 17.589 | 33.620 |
| 19 | 0.4863 | 16.601 | 18.751 | 16.700 | 13.827 | 12.878 |
| 19 | 0.4873 | 13.516 | 8.667  | 15.831 | 14.573 | 19.342 |
| 19 | 0.4883 | 25.373 | 15.921 | 25.907 | 20.019 | 10.754 |
| 19 | 0.4893 | 22.676 | 10.350 | 26.512 | 19.393 | 11.995 |
| 19 | 0.4903 | 16.672 | 11.378 | 19.884 | 34.620 | 11.942 |
| 19 | 0.4913 | 10.313 | 9.813  | 15.228 | 27.439 | 8.124  |
| 19 | 0.4923 | 14.334 | 13.089 | 9.696  | 17.248 | 14.159 |
| 19 | 0.4933 | 30.367 | 26.034 | 29.287 | 16.696 | 14.608 |
| 19 | 0.4943 | 30.529 | 26.048 | 29.451 | 16.645 | 14.565 |

|    |        |        |        |        |        |        |
|----|--------|--------|--------|--------|--------|--------|
| 19 | 0.4953 | 29.147 | 12.715 | 27.685 | 15.432 | 11.133 |
| 19 | 0.4963 | 23.876 | 27.801 | 33.530 | 11.583 | 12.382 |
| 19 | 0.4973 | 15.259 | 9.799  | 17.405 | 16.648 | 17.808 |
| 19 | 0.4983 | 29.487 | 16.899 | 25.249 | 19.589 | 23.041 |
| 19 | 0.4993 | 17.774 | 16.527 | 19.160 | 24.907 | 9.660  |
| 19 | 0.5003 | 11.098 | 9.739  | 11.761 | 21.026 | 14.894 |
| 19 | 0.5013 | 28.223 | 15.559 | 23.270 | 32.551 | 26.781 |
| 19 | 0.5023 | 23.791 | 12.898 | 24.807 | 26.832 | 25.799 |
| 19 | 0.5033 | 19.866 | 18.539 | 23.723 | 27.096 | 17.254 |
| 19 | 0.5043 | 20.811 | 16.152 | 18.807 | 25.515 | 19.745 |
| 19 | 0.5053 | 16.963 | 19.900 | 16.963 | 31.163 | 17.896 |
| 19 | 0.5063 | 16.308 | 14.803 | 12.609 | 14.143 | 12.073 |
| 19 | 0.5073 | 15.325 | 20.167 | 14.425 | 12.209 | 16.334 |
| 19 | 0.5083 | 23.621 | 23.684 | 20.870 | 9.343  | 20.617 |
| 19 | 0.5093 | 13.719 | 14.835 | 18.833 | 14.640 | 24.061 |
| 19 | 0.5103 | 18.820 | 13.475 | 22.077 | 15.593 | 27.898 |
| 19 | 0.5113 | 21.130 | 18.546 | 22.229 | 8.773  | 15.580 |
| 19 | 0.5123 | 25.988 | 21.201 | 23.737 | 30.805 | 36.025 |
| 19 | 0.5133 | 24.057 | 13.982 | 26.311 | 26.561 | 11.667 |
| 19 | 0.5143 | 16.688 | 15.505 | 15.333 | 18.287 | 10.322 |
| 19 | 0.5153 | 17.463 | 12.723 | 18.241 | 16.711 | 18.321 |
| 19 | 0.5163 | 15.930 | 12.883 | 17.576 | 25.797 | 27.282 |
| 19 | 0.5173 | 31.382 | 17.829 | 24.779 | 18.251 | 21.043 |
| 19 | 0.5183 | 21.223 | 10.984 | 9.824  | 8.319  | 14.280 |
| 19 | 0.5193 | 16.074 | 15.922 | 13.962 | 14.336 | 19.744 |
| 19 | 0.5203 | 31.703 | 24.534 | 19.976 | 20.102 | 17.830 |
| 19 | 0.5213 | 20.243 | 26.046 | 16.871 | 27.915 | 11.980 |
| 19 | 0.5223 | 12.442 | 11.776 | 9.075  | 25.920 | 15.913 |
| 19 | 0.5233 | 11.868 | 12.506 | 10.564 | 19.908 | 10.589 |
| 19 | 0.5243 | 14.485 | 13.143 | 12.808 | 14.393 | 12.004 |
| 19 | 0.5253 | 12.844 | 19.991 | 14.982 | 21.186 | 18.148 |
| 19 | 0.5263 | 27.156 | 31.299 | 26.371 | 19.461 | 27.392 |
| 19 | 0.5273 | 27.176 | 31.551 | 26.549 | 19.596 | 27.749 |
| 19 | 0.5283 | 14.495 | 21.845 | 19.319 | 12.074 | 23.409 |
| 19 | 0.5293 | 14.399 | 20.399 | 18.722 | 13.051 | 22.030 |
| 19 | 0.5303 | 16.469 | 15.936 | 16.153 | 11.748 | 17.689 |
| 19 | 0.5313 | 10.111 | 12.771 | 6.604  | 9.038  | 19.110 |
| 19 | 0.5323 | 10.585 | 10.499 | 9.788  | 10.597 | 11.372 |
| 19 | 0.5333 | 14.231 | 19.359 | 16.699 | 14.380 | 4.567  |
| 19 | 0.5343 | 17.334 | 28.775 | 19.882 | 30.938 | 14.684 |
| 19 | 0.5353 | 22.236 | 26.934 | 25.689 | 27.398 | 15.803 |
| 19 | 0.5363 | 19.120 | 20.374 | 16.851 | 17.955 | 18.014 |
| 19 | 0.5373 | 10.621 | 18.576 | 15.859 | 17.177 | 17.561 |
| 19 | 0.5383 | 22.549 | 27.935 | 23.062 | 15.879 | 19.280 |
| 19 | 0.5393 | 14.949 | 19.965 | 12.143 | 13.932 | 17.416 |
| 19 | 0.5403 | 12.975 | 17.742 | 17.459 | 18.921 | 15.705 |
| 19 | 0.5413 | 17.604 | 26.843 | 20.731 | 20.731 | 14.551 |
| 19 | 0.5423 | 19.646 | 22.288 | 23.708 | 10.764 | 10.562 |
| 19 | 0.5433 | 22.133 | 30.057 | 24.769 | 10.607 | 12.919 |
| 19 | 0.5443 | 17.613 | 18.591 | 19.501 | 8.256  | 3.781  |

|    |        |        |        |        |        |        |
|----|--------|--------|--------|--------|--------|--------|
| 19 | 0.5453 | 10.774 | 10.636 | 9.917  | 10.766 | 6.116  |
| 19 | 0.5463 | 7.300  | 15.573 | 10.750 | 8.102  | 8.770  |
| 19 | 0.5473 | 9.956  | 12.752 | 10.784 | 5.405  | 5.008  |
| 19 | 0.5483 | 13.705 | 12.580 | 13.146 | 5.567  | 9.887  |
| 19 | 0.5493 | 21.214 | 19.788 | 19.708 | 13.439 | 7.620  |
| 19 | 0.5503 | 14.834 | 29.926 | 18.580 | 9.466  | 9.854  |
| 19 | 0.5513 | 17.753 | 23.542 | 19.141 | 8.815  | 7.612  |
| 19 | 0.5523 | 18.680 | 25.833 | 20.401 | 12.316 | 11.204 |
| 19 | 0.5533 | 10.625 | 15.932 | 10.149 | 15.140 | 12.889 |
| 19 | 0.5543 | 10.088 | 11.327 | 11.341 | 13.592 | 7.869  |
| 19 | 0.5553 | 18.359 | 20.727 | 25.622 | 10.730 | 19.378 |
| 19 | 0.5563 | 19.397 | 21.327 | 22.158 | 17.000 | 13.469 |
| 19 | 0.5573 | 19.212 | 19.750 | 20.617 | 11.819 | 15.293 |
| 19 | 0.5583 | 21.945 | 22.960 | 26.433 | 10.590 | 9.647  |
| 19 | 0.5593 | 26.417 | 35.749 | 33.490 | 8.386  | 7.615  |
| 19 | 0.5603 | 23.085 | 31.649 | 31.406 | 5.525  | 10.244 |
| 19 | 0.5613 | 11.032 | 16.610 | 15.236 | 4.750  | 10.566 |
| 19 | 0.5623 | 16.559 | 20.870 | 20.226 | 3.924  | 11.374 |
| 19 | 0.5633 | 12.475 | 14.669 | 11.413 | 12.364 | 12.061 |
| 19 | 0.5643 | 21.743 | 24.112 | 26.825 | 11.408 | 24.205 |
| 19 | 0.5653 | 17.342 | 22.348 | 21.249 | 8.839  | 13.838 |
| 19 | 0.5663 | 18.033 | 15.323 | 20.217 | 16.795 | 11.292 |
| 19 | 0.5673 | 15.914 | 16.063 | 21.919 | 16.259 | 22.550 |
| 19 | 0.5683 | 8.053  | 9.475  | 8.961  | 3.338  | 24.644 |
| 19 | 0.5693 | 8.220  | 5.781  | 4.199  | 9.325  | 18.371 |
| 19 | 0.5703 | 11.991 | 11.518 | 13.268 | 19.997 | 23.437 |
| 19 | 0.5713 | 12.067 | 6.203  | 12.476 | 13.302 | 14.541 |
| 19 | 0.5723 | 15.238 | 10.771 | 14.668 | 17.970 | 13.579 |
| 19 | 0.5733 | 13.023 | 15.841 | 21.563 | 20.589 | 23.330 |
| 19 | 0.5743 | 21.071 | 13.853 | 23.809 | 21.728 | 14.488 |
| 19 | 0.5753 | 21.036 | 13.842 | 23.770 | 21.733 | 14.340 |
| 19 | 0.5763 | 20.454 | 21.232 | 25.849 | 15.664 | 11.492 |
| 19 | 0.5773 | 22.314 | 12.227 | 23.302 | 10.226 | 8.420  |
| 19 | 0.5783 | 21.300 | 13.541 | 19.913 | 9.650  | 7.993  |
| 19 | 0.5793 | 8.104  | 16.177 | 18.789 | 15.998 | 19.383 |
| 19 | 0.5803 | 5.843  | 12.997 | 14.912 | 17.904 | 17.059 |
| 19 | 0.5813 | 13.770 | 17.502 | 13.862 | 21.816 | 23.551 |
| 19 | 0.5823 | 11.099 | 8.566  | 11.460 | 4.605  | 11.748 |
| 19 | 0.5833 | 6.784  | 5.968  | 15.155 | 12.310 | 9.094  |
| 19 | 0.5843 | 8.802  | 13.749 | 20.819 | 23.308 | 13.955 |
| 19 | 0.5853 | 14.767 | 7.357  | 17.163 | 26.140 | 7.907  |
| 19 | 0.5863 | 12.732 | 20.775 | 15.570 | 26.056 | 10.366 |
| 19 | 0.5873 | 8.920  | 15.714 | 10.005 | 29.206 | 11.121 |
| 19 | 0.5883 | 10.668 | 18.728 | 13.857 | 11.352 | 10.373 |
| 19 | 0.5893 | 10.991 | 19.403 | 23.226 | 23.307 | 21.746 |
| 19 | 0.5903 | 13.599 | 12.698 | 17.597 | 17.318 | 13.746 |
| 19 | 0.5913 | 12.266 | 13.362 | 19.359 | 7.681  | 15.686 |
| 19 | 0.5923 | 19.302 | 18.903 | 34.373 | 15.977 | 10.431 |
| 19 | 0.5933 | 16.773 | 15.483 | 16.177 | 12.761 | 11.221 |
| 19 | 0.5943 | 7.657  | 7.990  | 15.418 | 6.369  | 16.293 |

|    |        |        |        |        |        |        |
|----|--------|--------|--------|--------|--------|--------|
| 19 | 0.5953 | 15.793 | 19.579 | 34.905 | 13.689 | 8.942  |
| 19 | 0.5963 | 2.771  | 6.406  | 12.202 | 6.939  | 13.697 |
| 19 | 0.5973 | 5.517  | 8.050  | 5.651  | 12.935 | 10.075 |
| 19 | 0.5983 | 15.125 | 17.697 | 16.557 | 11.829 | 13.672 |
| 19 | 0.5993 | 19.525 | 15.010 | 23.197 | 15.525 | 17.506 |
| 19 | 0.6003 | 25.977 | 26.663 | 42.890 | 14.391 | 8.560  |
| 19 | 0.6013 | 16.881 | 15.899 | 18.053 | 16.214 | 20.550 |
| 19 | 0.6023 | 15.484 | 20.217 | 23.934 | 15.971 | 27.735 |
| 19 | 0.6033 | 6.704  | 2.667  | 6.121  | 13.224 | 15.795 |
| 19 | 0.6043 | 26.997 | 14.173 | 23.973 | 22.259 | 28.218 |
| 19 | 0.6053 | 26.241 | 22.248 | 30.114 | 16.426 | 27.117 |
| 19 | 0.6063 | 13.204 | 8.994  | 21.661 | 11.539 | 24.495 |
| 19 | 0.6073 | 13.173 | 10.942 | 13.806 | 12.796 | 11.231 |
| 19 | 0.6083 | 21.518 | 18.869 | 27.036 | 12.546 | 14.109 |
| 19 | 0.6093 | 15.433 | 9.934  | 24.027 | 19.422 | 14.648 |
| 19 | 0.6103 | 17.811 | 11.477 | 21.121 | 20.024 | 9.253  |
| 19 | 0.6113 | 19.107 | 10.943 | 12.392 | 17.358 | 13.338 |
| 19 | 0.6123 | 27.435 | 16.128 | 29.500 | 19.493 | 18.682 |
| 19 | 0.6133 | 28.197 | 15.967 | 26.571 | 19.678 | 18.333 |
| 19 | 0.6143 | 16.316 | 12.245 | 24.627 | 25.157 | 21.556 |
| 19 | 0.6153 | 21.259 | 14.369 | 23.356 | 23.189 | 15.975 |
| 19 | 0.6163 | 22.564 | 12.064 | 19.344 | 19.458 | 14.462 |
| 19 | 0.6173 | 13.694 | 14.394 | 7.551  | 17.175 | 19.252 |
| 19 | 0.6183 | 14.516 | 10.892 | 13.225 | 9.472  | 15.822 |
| 19 | 0.6193 | 13.108 | 6.122  | 12.162 | 10.137 | 18.019 |
| 19 | 0.6203 | 0.000  | 0.943  | 0.292  | 0.535  | 0.001  |
| 19 | 0.6213 | 0.338  | 0.158  | 0.551  | 0.339  | 0.081  |
| 20 | 0.0017 | 0.000  | 0.000  | 0.000  | 0.000  | 0.000  |
| 20 | 0.0027 | 8.415  | 10.463 | 13.861 | 11.101 | 16.443 |
| 20 | 0.0037 | 14.178 | 12.396 | 14.878 | 4.632  | 13.642 |
| 20 | 0.0047 | 7.677  | 8.854  | 9.123  | 6.923  | 10.782 |
| 20 | 0.0057 | 15.852 | 10.001 | 12.713 | 5.099  | 6.719  |
| 20 | 0.0067 | 9.532  | 5.283  | 6.038  | 8.508  | 7.812  |
| 20 | 0.0077 | 15.529 | 9.885  | 9.448  | 18.831 | 10.514 |
| 20 | 0.0087 | 23.176 | 14.929 | 24.170 | 4.423  | 16.889 |
| 20 | 0.0097 | 11.744 | 17.145 | 15.651 | 15.526 | 14.963 |
| 20 | 0.0107 | 16.725 | 10.099 | 17.627 | 10.208 | 18.324 |
| 20 | 0.0117 | 13.583 | 7.558  | 12.173 | 13.573 | 15.019 |
| 20 | 0.0127 | 18.418 | 17.919 | 22.607 | 13.033 | 7.728  |
| 20 | 0.0137 | 7.515  | 6.314  | 5.813  | 11.590 | 13.741 |
| 20 | 0.0147 | 9.075  | 6.882  | 5.192  | 12.887 | 9.166  |
| 20 | 0.0157 | 13.452 | 14.525 | 16.096 | 13.204 | 21.190 |
| 20 | 0.0167 | 18.780 | 13.151 | 15.420 | 10.722 | 20.250 |
| 20 | 0.0177 | 14.508 | 6.838  | 13.929 | 12.846 | 15.000 |
| 20 | 0.0187 | 8.991  | 16.724 | 19.933 | 10.130 | 14.919 |
| 20 | 0.0197 | 13.363 | 12.272 | 13.501 | 5.641  | 18.137 |
| 20 | 0.0207 | 11.620 | 13.749 | 15.052 | 9.532  | 14.854 |
| 20 | 0.0217 | 22.251 | 21.196 | 21.318 | 11.746 | 12.536 |
| 20 | 0.0227 | 17.839 | 15.276 | 15.536 | 7.185  | 14.320 |
| 20 | 0.0237 | 14.637 | 12.671 | 16.461 | 10.447 | 14.858 |

|    |        |        |        |        |        |        |
|----|--------|--------|--------|--------|--------|--------|
| 20 | 0.0247 | 15.055 | 16.448 | 20.447 | 7.669  | 14.070 |
| 20 | 0.0257 | 8.506  | 10.074 | 16.248 | 5.189  | 13.262 |
| 20 | 0.0267 | 8.603  | 6.362  | 13.577 | 12.805 | 14.783 |
| 20 | 0.0277 | 10.658 | 8.048  | 15.073 | 9.264  | 12.703 |
| 20 | 0.0287 | 9.994  | 6.945  | 9.766  | 9.095  | 6.362  |
| 20 | 0.0297 | 9.647  | 7.245  | 10.977 | 11.577 | 14.156 |
| 20 | 0.0307 | 17.954 | 13.528 | 19.162 | 7.390  | 18.874 |
| 20 | 0.0317 | 13.700 | 11.480 | 16.290 | 12.456 | 25.908 |
| 20 | 0.0327 | 20.540 | 14.239 | 20.742 | 7.340  | 13.584 |
| 20 | 0.0337 | 15.305 | 15.079 | 17.202 | 7.031  | 15.508 |
| 20 | 0.0347 | 16.392 | 16.857 | 16.628 | 6.030  | 14.122 |
| 20 | 0.0357 | 16.395 | 16.872 | 16.639 | 6.127  | 14.098 |
| 20 | 0.0367 | 6.158  | 7.982  | 5.470  | 6.526  | 20.001 |
| 20 | 0.0377 | 3.300  | 4.334  | 3.277  | 6.512  | 3.697  |
| 20 | 0.0387 | 6.538  | 7.414  | 8.930  | 5.830  | 5.226  |
| 20 | 0.0397 | 6.638  | 7.048  | 7.334  | 4.608  | 9.271  |
| 20 | 0.0407 | 7.458  | 4.117  | 7.351  | 11.195 | 5.850  |
| 20 | 0.0417 | 12.634 | 13.699 | 18.649 | 12.529 | 12.327 |
| 20 | 0.0427 | 17.923 | 12.830 | 16.196 | 7.477  | 11.000 |
| 20 | 0.0437 | 17.248 | 17.712 | 19.327 | 7.103  | 11.569 |
| 20 | 0.0447 | 17.206 | 17.556 | 19.182 | 7.126  | 11.623 |
| 20 | 0.0457 | 15.392 | 14.618 | 19.368 | 13.781 | 16.004 |
| 20 | 0.0467 | 20.567 | 16.411 | 14.796 | 7.978  | 16.730 |
| 20 | 0.0477 | 15.972 | 15.665 | 16.319 | 16.877 | 11.370 |
| 20 | 0.0487 | 24.768 | 30.774 | 24.473 | 22.849 | 15.471 |
| 20 | 0.0497 | 27.799 | 26.963 | 22.959 | 27.822 | 14.766 |
| 20 | 0.0507 | 24.686 | 20.968 | 17.657 | 22.672 | 16.371 |
| 20 | 0.0517 | 12.321 | 10.793 | 11.060 | 15.339 | 22.241 |
| 20 | 0.0527 | 9.658  | 6.515  | 9.787  | 11.576 | 13.996 |
| 20 | 0.0537 | 12.390 | 11.193 | 12.761 | 12.599 | 13.539 |
| 20 | 0.0547 | 10.859 | 12.222 | 9.555  | 19.427 | 6.708  |
| 20 | 0.0557 | 19.466 | 13.814 | 12.616 | 16.758 | 15.807 |
| 20 | 0.0567 | 17.092 | 12.644 | 11.872 | 12.924 | 16.553 |
| 20 | 0.0577 | 21.950 | 19.071 | 20.292 | 14.896 | 24.525 |
| 20 | 0.0587 | 17.095 | 22.319 | 24.182 | 15.850 | 19.165 |
| 20 | 0.0597 | 16.366 | 18.781 | 17.725 | 22.461 | 18.511 |
| 20 | 0.0607 | 18.420 | 19.442 | 12.593 | 19.102 | 12.347 |
| 20 | 0.0617 | 19.302 | 15.886 | 8.571  | 18.781 | 20.227 |
| 20 | 0.0627 | 16.635 | 8.291  | 11.414 | 26.445 | 22.299 |
| 20 | 0.0637 | 8.844  | 14.975 | 10.841 | 14.755 | 4.113  |
| 20 | 0.0647 | 11.239 | 17.978 | 10.703 | 14.784 | 9.327  |
| 20 | 0.0657 | 11.508 | 23.784 | 11.996 | 14.643 | 11.365 |
| 20 | 0.0667 | 14.467 | 9.465  | 10.632 | 11.821 | 10.291 |
| 20 | 0.0677 | 11.466 | 12.957 | 11.669 | 11.070 | 9.667  |
| 20 | 0.0687 | 6.936  | 23.528 | 15.974 | 21.858 | 7.576  |
| 20 | 0.0697 | 6.162  | 11.667 | 9.839  | 23.603 | 11.250 |
| 20 | 0.0707 | 12.738 | 25.272 | 19.655 | 31.618 | 15.687 |
| 20 | 0.0717 | 17.525 | 13.081 | 13.513 | 14.794 | 8.921  |
| 20 | 0.0727 | 10.413 | 9.101  | 10.835 | 9.179  | 8.912  |
| 20 | 0.0737 | 12.477 | 10.433 | 12.034 | 15.870 | 6.444  |

|    |        |        |        |        |        |        |
|----|--------|--------|--------|--------|--------|--------|
| 20 | 0.0747 | 10.923 | 14.520 | 16.208 | 18.636 | 20.455 |
| 20 | 0.0757 | 10.817 | 9.415  | 8.181  | 10.456 | 9.406  |
| 20 | 0.0767 | 11.746 | 13.976 | 11.130 | 10.266 | 5.232  |
| 20 | 0.0777 | 10.782 | 9.434  | 9.510  | 10.954 | 7.496  |
| 20 | 0.0787 | 18.892 | 12.860 | 12.999 | 11.517 | 16.780 |
| 20 | 0.0797 | 14.922 | 15.030 | 9.483  | 9.283  | 12.432 |
| 20 | 0.0807 | 13.575 | 15.653 | 9.482  | 15.839 | 15.315 |
| 20 | 0.0817 | 16.928 | 11.214 | 13.118 | 15.162 | 12.717 |
| 20 | 0.0827 | 12.183 | 8.272  | 8.136  | 9.836  | 9.191  |
| 20 | 0.0837 | 16.449 | 7.895  | 14.063 | 11.937 | 16.912 |
| 20 | 0.0847 | 9.403  | 3.826  | 8.744  | 14.211 | 8.983  |
| 20 | 0.0857 | 2.633  | 4.318  | 3.266  | 18.833 | 9.511  |
| 20 | 0.0867 | 2.693  | 1.295  | 1.701  | 3.794  | 3.191  |
| 20 | 0.0877 | 4.448  | 6.801  | 8.996  | 14.841 | 11.618 |
| 20 | 0.0887 | 8.783  | 5.215  | 9.407  | 10.257 | 13.536 |
| 20 | 0.0897 | 10.844 | 7.415  | 13.803 | 11.137 | 10.707 |
| 20 | 0.0907 | 6.829  | 5.325  | 9.711  | 6.530  | 7.612  |
| 20 | 0.0917 | 13.028 | 5.448  | 9.901  | 9.783  | 13.092 |
| 20 | 0.0927 | 7.425  | 2.951  | 5.631  | 8.546  | 11.274 |
| 20 | 0.0937 | 8.624  | 6.226  | 13.825 | 6.428  | 11.864 |
| 20 | 0.0947 | 13.054 | 11.790 | 14.478 | 8.693  | 16.740 |
| 20 | 0.0957 | 6.828  | 5.548  | 12.018 | 6.793  | 9.776  |
| 20 | 0.0967 | 9.675  | 8.759  | 16.238 | 12.471 | 17.856 |
| 20 | 0.0977 | 7.357  | 5.465  | 12.824 | 13.548 | 13.204 |
| 20 | 0.0987 | 9.796  | 8.509  | 7.746  | 8.299  | 10.567 |
| 20 | 0.0997 | 11.620 | 9.888  | 12.396 | 13.067 | 19.523 |
| 20 | 0.1007 | 9.962  | 11.204 | 8.595  | 11.904 | 15.685 |
| 20 | 0.1017 | 7.281  | 2.556  | 9.596  | 4.463  | 5.658  |
| 20 | 0.1027 | 13.995 | 11.157 | 16.807 | 10.831 | 8.376  |
| 20 | 0.1037 | 13.988 | 11.230 | 16.854 | 11.008 | 8.704  |
| 20 | 0.1047 | 6.928  | 8.246  | 8.570  | 8.034  | 9.245  |
| 20 | 0.1057 | 8.784  | 12.055 | 7.924  | 14.241 | 8.778  |
| 20 | 0.1067 | 10.487 | 6.129  | 10.402 | 12.750 | 7.566  |
| 20 | 0.1077 | 13.571 | 13.212 | 13.429 | 13.536 | 10.197 |
| 20 | 0.1087 | 8.150  | 10.638 | 11.188 | 19.357 | 6.422  |
| 20 | 0.1097 | 4.003  | 5.983  | 5.926  | 10.161 | 7.525  |
| 20 | 0.1107 | 7.973  | 8.976  | 16.483 | 7.526  | 8.412  |
| 20 | 0.1117 | 13.085 | 10.509 | 14.002 | 13.957 | 4.850  |
| 20 | 0.1127 | 14.363 | 11.685 | 14.606 | 18.199 | 9.865  |
| 20 | 0.1137 | 11.470 | 12.507 | 14.032 | 7.308  | 13.233 |
| 20 | 0.1147 | 8.525  | 10.771 | 13.304 | 10.626 | 10.200 |
| 20 | 0.1157 | 14.347 | 10.127 | 18.302 | 10.635 | 11.099 |
| 20 | 0.1167 | 17.636 | 8.843  | 12.377 | 13.764 | 21.744 |
| 20 | 0.1177 | 7.993  | 6.013  | 8.289  | 7.998  | 4.577  |
| 20 | 0.1187 | 14.081 | 6.145  | 9.815  | 14.572 | 11.042 |
| 20 | 0.1197 | 14.380 | 10.487 | 11.606 | 10.881 | 8.266  |
| 20 | 0.1207 | 15.135 | 16.368 | 17.222 | 5.405  | 5.152  |
| 20 | 0.1217 | 10.995 | 20.623 | 13.851 | 18.892 | 7.312  |
| 20 | 0.1227 | 27.591 | 10.721 | 20.780 | 20.140 | 27.674 |
| 20 | 0.1237 | 27.615 | 10.695 | 20.788 | 20.199 | 27.749 |

|    |        |        |        |        |        |        |
|----|--------|--------|--------|--------|--------|--------|
| 20 | 0.1247 | 16.572 | 17.127 | 19.055 | 11.188 | 20.157 |
| 20 | 0.1257 | 12.321 | 13.549 | 9.977  | 15.784 | 26.345 |
| 20 | 0.1267 | 15.189 | 13.293 | 15.759 | 22.420 | 15.677 |
| 20 | 0.1277 | 16.696 | 22.109 | 18.358 | 20.932 | 19.181 |
| 20 | 0.1287 | 24.168 | 14.246 | 15.896 | 12.849 | 20.061 |
| 20 | 0.1297 | 21.952 | 13.858 | 14.989 | 11.545 | 11.557 |
| 20 | 0.1307 | 11.909 | 11.025 | 11.477 | 14.116 | 22.347 |
| 20 | 0.1317 | 19.024 | 12.540 | 19.097 | 14.016 | 12.565 |
| 20 | 0.1327 | 19.558 | 17.387 | 18.648 | 18.492 | 21.693 |
| 20 | 0.1337 | 14.590 | 14.686 | 14.932 | 15.392 | 13.506 |
| 20 | 0.1347 | 15.127 | 17.704 | 16.362 | 11.482 | 5.604  |
| 20 | 0.1357 | 20.952 | 10.804 | 17.152 | 12.062 | 6.192  |
| 20 | 0.1367 | 18.378 | 16.094 | 18.774 | 17.761 | 13.757 |
| 20 | 0.1377 | 22.559 | 21.755 | 16.472 | 18.180 | 19.779 |
| 20 | 0.1387 | 8.998  | 5.660  | 10.157 | 14.085 | 7.766  |
| 20 | 0.1397 | 2.589  | 0.751  | 2.508  | 4.165  | 2.519  |
| 20 | 0.1407 | 5.818  | 3.019  | 7.649  | 2.382  | 1.799  |
| 20 | 0.1417 | 9.123  | 8.716  | 10.536 | 6.350  | 8.188  |
| 20 | 0.1427 | 13.890 | 12.502 | 11.694 | 9.547  | 12.381 |
| 20 | 0.1437 | 17.390 | 13.030 | 13.552 | 15.455 | 13.060 |
| 20 | 0.1447 | 12.488 | 10.790 | 13.089 | 15.158 | 11.068 |
| 20 | 0.1457 | 10.659 | 2.676  | 10.303 | 16.249 | 5.355  |
| 20 | 0.1467 | 20.634 | 9.183  | 13.447 | 12.477 | 9.790  |
| 20 | 0.1477 | 22.150 | 17.787 | 18.496 | 7.999  | 17.126 |
| 20 | 0.1487 | 18.425 | 26.843 | 21.818 | 12.174 | 9.266  |
| 20 | 0.1497 | 10.793 | 12.049 | 9.709  | 11.050 | 16.256 |
| 20 | 0.1507 | 6.091  | 6.540  | 7.057  | 9.012  | 12.918 |
| 20 | 0.1517 | 7.873  | 5.376  | 7.342  | 12.627 | 10.687 |
| 20 | 0.1527 | 13.093 | 8.811  | 10.552 | 9.485  | 4.964  |
| 20 | 0.1537 | 17.396 | 17.549 | 19.993 | 11.567 | 24.158 |
| 20 | 0.1547 | 18.786 | 17.934 | 13.861 | 14.928 | 25.127 |
| 20 | 0.1557 | 13.608 | 14.053 | 10.563 | 19.783 | 15.164 |
| 20 | 0.1567 | 12.133 | 4.594  | 8.794  | 12.010 | 18.614 |
| 20 | 0.1577 | 13.151 | 14.237 | 16.898 | 15.165 | 12.948 |
| 20 | 0.1587 | 10.580 | 13.851 | 15.507 | 22.132 | 29.737 |
| 20 | 0.1597 | 13.274 | 11.530 | 13.189 | 20.347 | 18.029 |
| 20 | 0.1607 | 12.919 | 13.027 | 11.428 | 12.097 | 12.547 |
| 20 | 0.1617 | 6.926  | 7.411  | 11.188 | 12.739 | 11.309 |
| 20 | 0.1627 | 13.507 | 10.776 | 15.541 | 11.867 | 10.018 |
| 20 | 0.1637 | 9.762  | 7.736  | 7.969  | 9.608  | 5.325  |
| 20 | 0.1647 | 9.288  | 9.014  | 6.355  | 10.924 | 11.907 |
| 20 | 0.1657 | 9.809  | 12.400 | 15.568 | 9.592  | 9.320  |
| 20 | 0.1667 | 18.199 | 17.079 | 21.365 | 11.797 | 8.647  |
| 20 | 0.1677 | 4.180  | 4.275  | 5.907  | 7.045  | 11.149 |
| 20 | 0.1687 | 7.268  | 13.163 | 8.128  | 16.327 | 9.833  |
| 20 | 0.1697 | 16.083 | 18.493 | 13.370 | 21.724 | 17.672 |
| 20 | 0.1707 | 14.178 | 13.586 | 16.988 | 17.597 | 20.223 |
| 20 | 0.1717 | 12.128 | 7.498  | 12.187 | 18.318 | 13.991 |
| 20 | 0.1727 | 9.920  | 10.052 | 12.169 | 12.788 | 13.609 |
| 20 | 0.1737 | 15.754 | 19.872 | 20.138 | 16.091 | 25.467 |

|    |        |        |        |        |        |        |
|----|--------|--------|--------|--------|--------|--------|
| 20 | 0.1747 | 16.232 | 12.912 | 17.343 | 7.563  | 28.492 |
| 20 | 0.1757 | 14.150 | 14.900 | 17.610 | 10.723 | 27.870 |
| 20 | 0.1767 | 19.973 | 7.368  | 16.305 | 15.004 | 16.665 |
| 20 | 0.1777 | 12.494 | 14.222 | 16.060 | 14.457 | 9.332  |
| 20 | 0.1787 | 8.012  | 7.979  | 11.494 | 18.640 | 21.046 |
| 20 | 0.1797 | 5.839  | 10.781 | 10.154 | 14.282 | 23.891 |
| 20 | 0.1807 | 6.416  | 4.965  | 7.106  | 16.909 | 21.194 |
| 20 | 0.1817 | 8.770  | 6.584  | 5.504  | 11.583 | 15.485 |
| 20 | 0.1827 | 7.519  | 1.592  | 4.559  | 11.471 | 8.923  |
| 20 | 0.1837 | 7.749  | 9.388  | 9.199  | 9.367  | 5.808  |
| 20 | 0.1847 | 11.789 | 11.201 | 14.303 | 8.186  | 8.094  |
| 20 | 0.1857 | 6.117  | 6.634  | 7.981  | 4.499  | 14.684 |
| 20 | 0.1867 | 15.671 | 13.020 | 12.263 | 8.950  | 17.431 |
| 20 | 0.1877 | 6.961  | 5.804  | 7.286  | 14.496 | 15.416 |
| 20 | 0.1887 | 10.015 | 13.538 | 13.747 | 20.510 | 9.333  |
| 20 | 0.1897 | 8.030  | 4.008  | 11.679 | 15.208 | 21.199 |
| 20 | 0.1907 | 18.509 | 12.616 | 22.077 | 20.074 | 10.611 |
| 20 | 0.1917 | 35.061 | 17.053 | 22.934 | 11.157 | 11.814 |
| 20 | 0.1927 | 18.601 | 12.779 | 13.024 | 18.630 | 18.074 |
| 20 | 0.1937 | 28.220 | 9.056  | 15.637 | 22.524 | 26.028 |
| 20 | 0.1947 | 27.242 | 21.401 | 29.314 | 15.498 | 17.246 |
| 20 | 0.1957 | 15.051 | 9.993  | 16.221 | 10.378 | 12.456 |
| 20 | 0.1967 | 18.723 | 14.145 | 14.634 | 10.377 | 19.384 |
| 20 | 0.1977 | 17.192 | 13.806 | 14.029 | 17.504 | 23.658 |
| 20 | 0.1987 | 16.942 | 22.738 | 22.059 | 10.377 | 16.769 |
| 20 | 0.1997 | 14.145 | 13.023 | 8.398  | 4.736  | 18.118 |
| 20 | 0.2007 | 16.342 | 14.305 | 16.747 | 20.418 | 13.575 |
| 20 | 0.2017 | 14.978 | 9.036  | 14.294 | 22.424 | 13.962 |
| 20 | 0.2027 | 7.290  | 9.613  | 5.989  | 26.765 | 11.753 |
| 20 | 0.2037 | 9.676  | 7.418  | 12.765 | 12.148 | 15.123 |
| 20 | 0.2047 | 13.283 | 16.828 | 16.802 | 27.656 | 24.245 |
| 20 | 0.2057 | 13.350 | 9.378  | 7.835  | 25.809 | 16.672 |
| 20 | 0.2067 | 10.277 | 7.823  | 10.215 | 17.922 | 22.741 |
| 20 | 0.2077 | 23.236 | 28.180 | 27.424 | 26.923 | 20.965 |
| 20 | 0.2087 | 16.069 | 21.777 | 20.252 | 20.009 | 14.957 |
| 20 | 0.2097 | 8.377  | 9.408  | 9.545  | 12.674 | 24.730 |
| 20 | 0.2107 | 13.244 | 16.418 | 12.950 | 16.004 | 25.161 |
| 20 | 0.2117 | 9.209  | 8.907  | 12.260 | 12.388 | 28.889 |
| 20 | 0.2127 | 11.168 | 15.599 | 9.759  | 15.747 | 26.274 |
| 20 | 0.2137 | 14.492 | 10.609 | 11.408 | 7.325  | 13.757 |
| 20 | 0.2147 | 9.056  | 14.203 | 18.510 | 13.836 | 23.054 |
| 20 | 0.2157 | 8.401  | 5.578  | 11.628 | 16.168 | 22.197 |
| 20 | 0.2167 | 7.661  | 7.461  | 10.240 | 13.829 | 20.994 |
| 20 | 0.2177 | 8.435  | 10.150 | 10.914 | 23.042 | 27.172 |
| 20 | 0.2187 | 8.440  | 10.161 | 10.886 | 23.031 | 27.074 |
| 20 | 0.2197 | 9.579  | 11.536 | 14.044 | 4.186  | 6.240  |
| 20 | 0.2207 | 10.657 | 16.574 | 18.308 | 11.581 | 15.273 |
| 20 | 0.2217 | 9.575  | 5.028  | 7.708  | 16.514 | 31.314 |
| 20 | 0.2227 | 11.152 | 9.533  | 10.711 | 17.211 | 14.772 |
| 20 | 0.2237 | 9.970  | 9.790  | 13.418 | 13.509 | 12.479 |



|    |        |        |        |        |        |        |
|----|--------|--------|--------|--------|--------|--------|
| 20 | 0.2247 | 8.996  | 10.338 | 12.489 | 15.023 | 16.166 |
| 20 | 0.2257 | 23.474 | 21.926 | 17.024 | 23.141 | 13.088 |
| 20 | 0.2267 | 14.739 | 11.968 | 8.992  | 19.600 | 19.174 |
| 20 | 0.2277 | 16.004 | 17.486 | 17.556 | 11.948 | 21.910 |
| 20 | 0.2287 | 27.434 | 20.790 | 14.686 | 15.304 | 8.799  |
| 20 | 0.2297 | 20.098 | 19.707 | 24.775 | 20.254 | 23.078 |
| 20 | 0.2307 | 13.988 | 14.901 | 17.138 | 12.744 | 18.524 |
| 20 | 0.2317 | 24.449 | 20.145 | 18.267 | 17.854 | 23.709 |
| 20 | 0.2327 | 10.160 | 8.639  | 10.810 | 12.242 | 11.019 |
| 20 | 0.2337 | 7.865  | 7.078  | 10.577 | 7.747  | 11.611 |
| 20 | 0.2347 | 8.206  | 8.587  | 11.432 | 8.800  | 12.810 |
| 20 | 0.2357 | 9.879  | 10.319 | 14.510 | 6.618  | 6.214  |
| 20 | 0.2367 | 6.097  | 6.028  | 7.552  | 4.290  | 5.686  |
| 20 | 0.2377 | 1.876  | 3.695  | 2.058  | 6.233  | 6.899  |
| 20 | 0.2387 | 8.465  | 12.025 | 11.172 | 12.575 | 19.700 |
| 20 | 0.2397 | 10.200 | 6.638  | 12.618 | 21.227 | 26.828 |
| 20 | 0.2407 | 21.254 | 22.680 | 20.834 | 17.834 | 30.789 |
| 20 | 0.2417 | 21.605 | 17.365 | 17.555 | 12.735 | 21.931 |
| 20 | 0.2427 | 16.872 | 10.557 | 16.797 | 18.587 | 27.421 |
| 20 | 0.2437 | 9.050  | 6.915  | 9.944  | 12.589 | 18.233 |
| 20 | 0.2447 | 15.700 | 12.242 | 13.511 | 8.376  | 17.731 |
| 20 | 0.2457 | 7.454  | 5.440  | 8.474  | 7.581  | 25.379 |
| 20 | 0.2467 | 11.393 | 9.757  | 10.740 | 7.995  | 19.990 |
| 20 | 0.2477 | 10.309 | 8.682  | 9.895  | 18.437 | 13.567 |
| 20 | 0.2487 | 8.074  | 5.826  | 5.102  | 6.986  | 30.449 |
| 20 | 0.2497 | 16.154 | 10.879 | 14.805 | 11.410 | 30.946 |
| 20 | 0.2507 | 18.215 | 11.753 | 12.827 | 14.602 | 29.529 |
| 20 | 0.2517 | 8.225  | 7.024  | 4.810  | 10.685 | 14.242 |
| 20 | 0.2527 | 10.456 | 9.426  | 13.824 | 13.882 | 14.649 |
| 20 | 0.2537 | 7.906  | 13.544 | 7.166  | 26.824 | 42.487 |
| 20 | 0.2547 | 7.912  | 13.451 | 7.108  | 26.919 | 42.624 |
| 20 | 0.2557 | 6.331  | 8.619  | 6.752  | 11.316 | 26.815 |
| 20 | 0.2567 | 8.210  | 8.742  | 9.439  | 12.442 | 20.916 |
| 20 | 0.2577 | 4.804  | 6.867  | 3.367  | 7.900  | 7.143  |
| 20 | 0.2587 | 8.204  | 13.980 | 9.985  | 6.959  | 7.803  |
| 20 | 0.2597 | 23.049 | 16.499 | 12.384 | 3.974  | 11.538 |
| 20 | 0.2607 | 27.524 | 17.455 | 12.403 | 7.247  | 8.178  |
| 20 | 0.2617 | 17.545 | 14.346 | 14.347 | 18.597 | 24.243 |
| 20 | 0.2627 | 17.927 | 11.835 | 10.638 | 8.857  | 23.506 |
| 20 | 0.2637 | 24.457 | 12.826 | 11.442 | 9.692  | 19.722 |
| 20 | 0.2647 | 11.724 | 6.708  | 4.867  | 13.570 | 13.219 |
| 20 | 0.2657 | 14.041 | 9.840  | 10.067 | 21.037 | 12.902 |
| 20 | 0.2667 | 29.260 | 13.054 | 13.596 | 17.349 | 17.561 |
| 20 | 0.2677 | 13.870 | 13.416 | 15.314 | 15.294 | 14.991 |
| 20 | 0.2687 | 9.358  | 12.323 | 15.071 | 25.185 | 15.883 |
| 20 | 0.2697 | 12.046 | 18.579 | 12.673 | 12.972 | 16.705 |
| 20 | 0.2707 | 12.256 | 13.705 | 14.308 | 20.218 | 9.639  |
| 20 | 0.2717 | 11.635 | 10.539 | 12.404 | 25.955 | 19.843 |
| 20 | 0.2727 | 4.770  | 11.416 | 7.699  | 19.333 | 17.970 |
| 20 | 0.2737 | 21.563 | 12.376 | 13.411 | 20.330 | 20.395 |

|    |        |        |        |        |        |        |
|----|--------|--------|--------|--------|--------|--------|
| 20 | 0.2747 | 16.652 | 13.445 | 19.331 | 15.665 | 15.611 |
| 20 | 0.2757 | 15.581 | 12.171 | 22.505 | 9.332  | 12.830 |
| 20 | 0.2767 | 15.077 | 13.406 | 12.633 | 16.278 | 10.974 |
| 20 | 0.2777 | 7.071  | 10.886 | 8.270  | 25.097 | 13.422 |
| 20 | 0.2787 | 20.373 | 12.583 | 20.115 | 12.282 | 9.955  |
| 20 | 0.2797 | 20.650 | 13.210 | 14.196 | 15.703 | 10.852 |
| 20 | 0.2807 | 11.696 | 11.428 | 12.714 | 14.923 | 9.595  |
| 20 | 0.2817 | 16.546 | 10.065 | 15.575 | 21.865 | 12.479 |
| 20 | 0.2827 | 6.841  | 6.120  | 12.197 | 17.102 | 9.663  |
| 20 | 0.2837 | 15.629 | 7.484  | 12.344 | 9.670  | 15.065 |
| 20 | 0.2847 | 8.481  | 5.598  | 5.656  | 13.950 | 15.800 |
| 20 | 0.2857 | 24.506 | 10.289 | 11.109 | 16.083 | 15.404 |
| 20 | 0.2867 | 13.966 | 7.316  | 14.172 | 24.146 | 19.393 |
| 20 | 0.2877 | 6.084  | 5.591  | 9.208  | 9.186  | 10.695 |
| 20 | 0.2887 | 7.109  | 2.683  | 6.833  | 19.425 | 8.473  |
| 20 | 0.2897 | 12.138 | 11.019 | 12.675 | 10.981 | 11.118 |
| 20 | 0.2907 | 7.167  | 8.176  | 11.504 | 15.964 | 13.321 |
| 20 | 0.2917 | 5.464  | 7.420  | 5.018  | 12.455 | 12.328 |
| 20 | 0.2927 | 9.007  | 6.487  | 10.837 | 15.100 | 15.804 |
| 20 | 0.2937 | 7.441  | 4.170  | 9.356  | 15.781 | 15.233 |
| 20 | 0.2947 | 5.972  | 0.957  | 4.510  | 10.458 | 8.266  |
| 20 | 0.2957 | 7.307  | 6.851  | 8.363  | 14.809 | 12.077 |
| 20 | 0.2967 | 4.867  | 12.015 | 10.789 | 15.291 | 16.185 |
| 20 | 0.2977 | 5.395  | 4.420  | 7.529  | 13.590 | 16.432 |
| 20 | 0.2987 | 1.946  | 5.813  | 4.664  | 13.477 | 13.762 |
| 20 | 0.2997 | 12.232 | 2.604  | 9.142  | 11.792 | 4.297  |
| 20 | 0.3007 | 17.183 | 7.828  | 7.870  | 17.042 | 20.749 |
| 20 | 0.3017 | 17.187 | 7.871  | 7.864  | 17.155 | 20.768 |
| 20 | 0.3027 | 8.613  | 7.749  | 14.899 | 8.899  | 10.679 |
| 20 | 0.3037 | 10.896 | 8.682  | 15.905 | 17.288 | 9.547  |
| 20 | 0.3047 | 5.389  | 6.200  | 9.864  | 18.465 | 19.263 |
| 20 | 0.3057 | 6.571  | 3.261  | 4.782  | 7.945  | 8.176  |
| 20 | 0.3067 | 6.297  | 8.453  | 8.565  | 14.482 | 11.379 |
| 20 | 0.3077 | 9.805  | 10.113 | 10.454 | 21.893 | 27.679 |
| 20 | 0.3087 | 8.122  | 4.000  | 9.404  | 7.871  | 9.486  |
| 20 | 0.3097 | 5.450  | 9.374  | 6.726  | 9.369  | 9.117  |
| 20 | 0.3107 | 16.560 | 13.055 | 9.582  | 19.177 | 9.738  |
| 20 | 0.3117 | 16.615 | 11.859 | 10.528 | 17.037 | 11.657 |
| 20 | 0.3127 | 4.199  | 9.134  | 8.186  | 8.662  | 9.626  |
| 20 | 0.3137 | 19.032 | 12.561 | 17.806 | 8.255  | 7.244  |
| 20 | 0.3147 | 12.364 | 7.306  | 6.352  | 11.949 | 7.746  |
| 20 | 0.3157 | 9.606  | 3.819  | 4.649  | 16.714 | 9.981  |
| 20 | 0.3167 | 9.528  | 12.274 | 8.830  | 14.927 | 16.593 |
| 20 | 0.3177 | 11.876 | 12.251 | 13.590 | 19.895 | 18.674 |
| 20 | 0.3187 | 10.983 | 5.547  | 6.955  | 12.009 | 11.659 |
| 20 | 0.3197 | 6.863  | 11.322 | 6.564  | 26.744 | 19.292 |
| 20 | 0.3207 | 3.972  | 6.465  | 6.648  | 12.166 | 15.203 |
| 20 | 0.3217 | 8.870  | 10.405 | 10.331 | 12.370 | 15.492 |
| 20 | 0.3227 | 5.677  | 8.666  | 8.309  | 5.199  | 10.476 |
| 20 | 0.3237 | 6.603  | 4.827  | 7.300  | 8.196  | 11.846 |

|    |        |        |        |        |        |        |
|----|--------|--------|--------|--------|--------|--------|
| 20 | 0.3247 | 9.227  | 10.141 | 12.953 | 13.586 | 21.490 |
| 20 | 0.3257 | 9.370  | 7.161  | 9.306  | 15.637 | 9.682  |
| 20 | 0.3267 | 10.965 | 5.840  | 7.476  | 19.276 | 16.249 |
| 20 | 0.3277 | 11.520 | 6.125  | 12.169 | 19.079 | 10.614 |
| 20 | 0.3287 | 7.640  | 3.128  | 6.428  | 16.473 | 7.858  |
| 20 | 0.3297 | 7.423  | 2.484  | 7.715  | 27.513 | 8.135  |
| 20 | 0.3307 | 8.852  | 9.583  | 9.274  | 18.914 | 6.820  |
| 20 | 0.3317 | 7.663  | 8.331  | 7.545  | 14.438 | 15.444 |
| 20 | 0.3327 | 16.382 | 12.685 | 19.958 | 12.208 | 9.512  |
| 20 | 0.3337 | 9.694  | 7.951  | 15.550 | 11.955 | 8.390  |
| 20 | 0.3347 | 8.210  | 7.610  | 8.808  | 14.154 | 9.421  |
| 20 | 0.3357 | 11.267 | 15.727 | 9.814  | 20.154 | 10.482 |
| 20 | 0.3367 | 11.077 | 17.591 | 18.210 | 20.572 | 12.763 |
| 20 | 0.3377 | 16.227 | 14.530 | 22.713 | 16.526 | 11.361 |
| 20 | 0.3387 | 13.980 | 13.263 | 17.706 | 21.273 | 15.011 |
| 20 | 0.3397 | 10.967 | 7.703  | 12.041 | 18.900 | 14.518 |
| 20 | 0.3407 | 5.052  | 14.107 | 7.254  | 16.325 | 8.333  |
| 20 | 0.3417 | 15.056 | 13.337 | 17.173 | 15.184 | 8.349  |
| 20 | 0.3427 | 10.159 | 8.243  | 12.754 | 9.637  | 3.246  |
| 20 | 0.3437 | 9.287  | 8.187  | 6.254  | 9.712  | 5.163  |
| 20 | 0.3447 | 14.183 | 10.184 | 8.950  | 12.159 | 6.635  |
| 20 | 0.3457 | 17.763 | 9.154  | 10.036 | 15.903 | 18.631 |
| 20 | 0.3467 | 14.790 | 12.618 | 9.381  | 11.959 | 10.204 |
| 20 | 0.3477 | 13.361 | 12.815 | 9.313  | 11.070 | 7.524  |
| 20 | 0.3487 | 19.674 | 11.068 | 15.883 | 13.666 | 8.582  |
| 20 | 0.3497 | 14.572 | 17.736 | 15.192 | 20.665 | 14.936 |
| 20 | 0.3507 | 16.503 | 17.307 | 15.523 | 25.048 | 13.992 |
| 20 | 0.3517 | 8.405  | 6.872  | 6.259  | 20.189 | 14.657 |
| 20 | 0.3527 | 7.104  | 5.715  | 5.961  | 12.375 | 13.024 |
| 20 | 0.3537 | 13.256 | 14.905 | 16.755 | 16.343 | 14.565 |
| 20 | 0.3547 | 9.153  | 8.902  | 9.793  | 21.457 | 25.955 |
| 20 | 0.3557 | 6.201  | 5.585  | 5.544  | 15.478 | 16.618 |
| 20 | 0.3567 | 16.404 | 9.626  | 13.804 | 14.216 | 10.964 |
| 20 | 0.3577 | 20.080 | 8.033  | 17.022 | 26.735 | 11.651 |
| 20 | 0.3587 | 17.981 | 9.479  | 16.161 | 26.616 | 23.343 |
| 20 | 0.3597 | 23.544 | 16.094 | 26.093 | 27.112 | 14.411 |
| 20 | 0.3607 | 10.231 | 9.836  | 8.383  | 24.956 | 15.075 |
| 20 | 0.3617 | 1.891  | 4.081  | 4.029  | 5.720  | 2.522  |
| 20 | 0.3627 | 7.582  | 3.978  | 9.322  | 19.970 | 6.783  |
| 20 | 0.3637 | 11.896 | 8.513  | 13.710 | 21.694 | 12.165 |
| 20 | 0.3647 | 10.317 | 4.610  | 10.730 | 22.241 | 19.035 |
| 20 | 0.3657 | 16.792 | 4.509  | 8.145  | 17.480 | 23.906 |
| 20 | 0.3667 | 8.625  | 1.410  | 3.090  | 16.215 | 10.371 |
| 20 | 0.3677 | 7.400  | 5.119  | 4.361  | 12.315 | 6.306  |
| 20 | 0.3687 | 5.298  | 5.217  | 4.360  | 8.450  | 6.746  |
| 20 | 0.3697 | 10.865 | 5.386  | 6.721  | 13.030 | 12.768 |
| 20 | 0.3707 | 11.195 | 4.971  | 7.048  | 13.844 | 13.153 |
| 20 | 0.3717 | 9.524  | 8.228  | 9.080  | 31.570 | 16.648 |
| 20 | 0.3727 | 7.136  | 12.646 | 12.340 | 22.201 | 7.073  |
| 20 | 0.3737 | 4.364  | 10.969 | 6.688  | 22.262 | 4.110  |

|    |        |        |        |        |        |        |
|----|--------|--------|--------|--------|--------|--------|
| 20 | 0.3747 | 13.101 | 14.295 | 15.163 | 8.790  | 3.401  |
| 20 | 0.3757 | 8.382  | 5.481  | 7.030  | 8.562  | 5.367  |
| 20 | 0.3767 | 6.702  | 3.167  | 8.068  | 21.317 | 14.901 |
| 20 | 0.3777 | 7.132  | 6.038  | 9.714  | 22.830 | 7.617  |
| 20 | 0.3787 | 6.387  | 5.388  | 9.196  | 19.721 | 5.696  |
| 20 | 0.3797 | 21.663 | 10.312 | 24.685 | 21.917 | 20.957 |
| 20 | 0.3807 | 9.068  | 12.606 | 9.008  | 19.023 | 12.708 |
| 20 | 0.3817 | 7.438  | 9.304  | 9.259  | 25.294 | 11.060 |
| 20 | 0.3827 | 11.740 | 10.616 | 10.062 | 18.382 | 4.247  |
| 20 | 0.3837 | 9.259  | 9.841  | 13.613 | 13.611 | 13.930 |
| 20 | 0.3847 | 16.248 | 7.505  | 19.041 | 12.012 | 4.799  |
| 20 | 0.3857 | 9.967  | 7.384  | 7.552  | 16.040 | 10.960 |
| 20 | 0.3867 | 10.169 | 16.221 | 11.356 | 19.914 | 12.306 |
| 20 | 0.3877 | 6.707  | 14.773 | 8.428  | 24.036 | 12.571 |
| 20 | 0.3887 | 7.896  | 12.151 | 8.659  | 20.629 | 9.075  |
| 20 | 0.3897 | 10.820 | 10.048 | 10.369 | 24.711 | 11.107 |
| 20 | 0.3907 | 11.176 | 8.299  | 9.358  | 29.167 | 17.946 |
| 20 | 0.3917 | 9.996  | 7.182  | 12.418 | 25.137 | 24.432 |
| 20 | 0.3927 | 12.667 | 11.202 | 19.487 | 23.869 | 14.169 |
| 20 | 0.3937 | 9.551  | 4.930  | 13.997 | 15.513 | 6.773  |
| 20 | 0.3947 | 9.545  | 4.893  | 13.951 | 15.482 | 6.756  |
| 20 | 0.3957 | 16.788 | 11.593 | 17.715 | 15.556 | 15.482 |
| 20 | 0.3967 | 13.684 | 10.482 | 14.733 | 18.560 | 13.278 |
| 20 | 0.3977 | 11.341 | 7.157  | 11.083 | 23.223 | 10.270 |
| 20 | 0.3987 | 6.040  | 8.216  | 7.519  | 26.518 | 13.830 |
| 20 | 0.3997 | 4.793  | 7.723  | 8.137  | 16.366 | 13.595 |
| 20 | 0.4007 | 4.943  | 11.698 | 9.905  | 22.634 | 27.114 |
| 20 | 0.4017 | 11.151 | 10.235 | 15.321 | 17.237 | 11.368 |
| 20 | 0.4027 | 23.425 | 16.341 | 21.664 | 17.137 | 14.493 |
| 20 | 0.4037 | 10.183 | 11.079 | 15.763 | 24.305 | 15.029 |
| 20 | 0.4047 | 11.254 | 12.448 | 9.952  | 27.972 | 18.728 |
| 20 | 0.4057 | 12.811 | 15.255 | 13.456 | 20.147 | 18.296 |
| 20 | 0.4067 | 12.546 | 9.789  | 9.582  | 20.803 | 13.895 |
| 20 | 0.4077 | 14.409 | 10.308 | 14.794 | 9.174  | 9.659  |
| 20 | 0.4087 | 9.703  | 8.153  | 9.810  | 8.326  | 11.378 |
| 20 | 0.4097 | 8.661  | 11.851 | 13.559 | 19.418 | 8.418  |
| 20 | 0.4107 | 9.504  | 7.602  | 10.661 | 15.120 | 8.690  |
| 20 | 0.4117 | 12.189 | 11.776 | 17.535 | 7.175  | 11.299 |
| 20 | 0.4127 | 16.848 | 12.471 | 18.781 | 24.504 | 11.218 |
| 20 | 0.4137 | 15.398 | 11.468 | 20.552 | 20.431 | 10.089 |
| 20 | 0.4147 | 14.805 | 12.147 | 17.713 | 14.674 | 10.718 |
| 20 | 0.4157 | 16.854 | 16.986 | 19.247 | 23.417 | 14.815 |
| 20 | 0.4167 | 15.267 | 8.710  | 18.302 | 31.539 | 14.023 |
| 20 | 0.4177 | 14.583 | 6.727  | 13.206 | 27.817 | 24.638 |
| 20 | 0.4187 | 9.606  | 7.257  | 7.855  | 22.630 | 17.900 |
| 20 | 0.4197 | 11.711 | 7.311  | 17.085 | 15.206 | 7.007  |
| 20 | 0.4207 | 7.928  | 1.324  | 10.840 | 7.713  | 5.466  |
| 20 | 0.4217 | 19.270 | 26.067 | 27.981 | 23.828 | 10.187 |
| 20 | 0.4227 | 13.712 | 21.972 | 20.083 | 24.543 | 17.897 |
| 20 | 0.4237 | 9.224  | 21.512 | 16.258 | 24.455 | 20.788 |

|    |        |        |        |        |        |        |
|----|--------|--------|--------|--------|--------|--------|
| 20 | 0.4247 | 12.273 | 17.315 | 19.107 | 26.033 | 8.104  |
| 20 | 0.4257 | 7.552  | 6.340  | 9.540  | 25.932 | 10.230 |
| 20 | 0.4267 | 14.359 | 14.229 | 18.480 | 22.264 | 7.252  |
| 20 | 0.4277 | 16.264 | 15.272 | 20.954 | 19.368 | 3.280  |
| 20 | 0.4287 | 13.005 | 13.777 | 15.089 | 16.807 | 7.423  |
| 20 | 0.4297 | 11.854 | 15.725 | 20.634 | 31.077 | 18.786 |
| 20 | 0.4307 | 13.444 | 15.977 | 22.475 | 16.348 | 8.398  |
| 20 | 0.4317 | 13.438 | 15.939 | 22.493 | 16.329 | 8.450  |
| 20 | 0.4327 | 14.734 | 18.284 | 21.005 | 28.616 | 21.915 |
| 20 | 0.4337 | 23.526 | 19.706 | 14.406 | 25.797 | 15.675 |
| 20 | 0.4347 | 15.973 | 19.356 | 17.698 | 26.113 | 21.004 |
| 20 | 0.4357 | 18.258 | 17.283 | 17.433 | 15.856 | 16.303 |
| 20 | 0.4367 | 18.310 | 17.355 | 17.289 | 15.701 | 16.654 |
| 20 | 0.4377 | 14.822 | 10.177 | 15.671 | 20.970 | 17.163 |
| 20 | 0.4387 | 17.138 | 22.472 | 17.974 | 19.444 | 13.792 |
| 20 | 0.4397 | 11.580 | 18.143 | 15.232 | 26.861 | 15.669 |
| 20 | 0.4407 | 7.678  | 14.621 | 10.493 | 17.467 | 17.131 |
| 20 | 0.4417 | 9.163  | 16.265 | 13.896 | 25.271 | 14.508 |
| 20 | 0.4427 | 21.187 | 21.804 | 26.156 | 21.272 | 9.237  |
| 20 | 0.4437 | 10.679 | 15.509 | 13.874 | 23.350 | 12.344 |
| 20 | 0.4447 | 5.663  | 10.202 | 9.825  | 18.051 | 14.409 |
| 20 | 0.4457 | 5.657  | 10.200 | 9.787  | 18.051 | 14.358 |
| 20 | 0.4467 | 10.214 | 14.135 | 13.582 | 21.732 | 20.420 |
| 20 | 0.4477 | 10.211 | 14.127 | 13.551 | 21.689 | 20.353 |
| 20 | 0.4487 | 12.395 | 11.374 | 12.958 | 11.243 | 12.839 |
| 20 | 0.4497 | 10.982 | 12.730 | 11.126 | 16.026 | 8.877  |
| 20 | 0.4507 | 22.444 | 28.747 | 28.786 | 19.531 | 12.174 |
| 20 | 0.4517 | 22.687 | 27.840 | 28.682 | 24.116 | 14.090 |
| 20 | 0.4527 | 13.837 | 18.684 | 16.047 | 23.546 | 16.373 |
| 20 | 0.4537 | 8.642  | 14.255 | 8.759  | 21.536 | 8.079  |
| 20 | 0.4547 | 7.063  | 16.057 | 11.902 | 18.627 | 6.970  |
| 20 | 0.4557 | 23.317 | 26.644 | 22.508 | 28.757 | 7.503  |
| 20 | 0.4567 | 19.018 | 24.044 | 20.532 | 23.926 | 10.056 |
| 20 | 0.4577 | 18.489 | 17.762 | 19.428 | 16.267 | 15.583 |
| 20 | 0.4587 | 8.810  | 16.755 | 10.773 | 10.854 | 9.813  |
| 20 | 0.4597 | 10.272 | 8.435  | 11.739 | 18.692 | 5.073  |
| 20 | 0.4607 | 12.035 | 14.372 | 13.268 | 30.453 | 11.122 |
| 20 | 0.4617 | 12.612 | 10.758 | 14.029 | 8.179  | 10.129 |
| 20 | 0.4627 | 7.730  | 12.387 | 7.946  | 26.238 | 10.466 |
| 20 | 0.4637 | 8.303  | 9.827  | 8.985  | 19.678 | 12.134 |
| 20 | 0.4647 | 8.085  | 11.612 | 10.802 | 15.900 | 10.338 |
| 20 | 0.4657 | 17.512 | 21.540 | 19.361 | 15.233 | 10.373 |
| 20 | 0.4667 | 15.954 | 20.664 | 21.711 | 9.909  | 9.041  |
| 20 | 0.4677 | 25.056 | 25.426 | 27.065 | 18.994 | 6.404  |
| 20 | 0.4687 | 14.596 | 14.059 | 16.877 | 22.223 | 9.707  |
| 20 | 0.4697 | 17.141 | 13.645 | 15.922 | 10.808 | 12.803 |
| 20 | 0.4707 | 6.160  | 8.741  | 10.898 | 8.426  | 12.899 |
| 20 | 0.4717 | 8.343  | 12.056 | 13.249 | 17.242 | 9.296  |
| 20 | 0.4727 | 12.775 | 14.730 | 17.667 | 19.227 | 9.880  |
| 20 | 0.4737 | 8.172  | 10.343 | 7.807  | 18.051 | 23.868 |

|    |        |        |        |        |        |        |
|----|--------|--------|--------|--------|--------|--------|
| 20 | 0.4747 | 7.607  | 11.655 | 9.861  | 21.495 | 17.379 |
| 20 | 0.4757 | 6.043  | 11.351 | 10.482 | 23.141 | 5.484  |
| 20 | 0.4767 | 1.433  | 10.877 | 3.299  | 19.284 | 2.048  |
| 20 | 0.4777 | 6.168  | 13.724 | 10.922 | 15.095 | 3.536  |
| 20 | 0.4787 | 4.593  | 11.970 | 8.761  | 8.886  | 7.592  |
| 20 | 0.4797 | 8.128  | 11.349 | 13.894 | 20.082 | 8.361  |
| 20 | 0.4807 | 4.379  | 9.277  | 6.093  | 14.553 | 10.326 |
| 20 | 0.4817 | 12.525 | 10.021 | 16.302 | 6.846  | 7.594  |
| 20 | 0.4827 | 7.569  | 4.571  | 9.896  | 8.585  | 11.502 |
| 20 | 0.4837 | 8.002  | 7.408  | 11.407 | 11.465 | 13.420 |
| 20 | 0.4847 | 6.536  | 10.001 | 8.591  | 15.436 | 9.315  |
| 20 | 0.4857 | 11.913 | 11.751 | 15.196 | 21.260 | 9.108  |
| 20 | 0.4867 | 8.839  | 7.537  | 7.782  | 23.950 | 18.584 |
| 20 | 0.4877 | 8.825  | 9.816  | 8.173  | 17.909 | 16.605 |
| 20 | 0.4887 | 6.965  | 10.847 | 6.664  | 13.443 | 15.021 |
| 20 | 0.4897 | 6.959  | 10.871 | 6.614  | 13.646 | 14.956 |
| 20 | 0.4907 | 4.869  | 3.991  | 4.276  | 15.938 | 13.984 |
| 20 | 0.4917 | 4.865  | 3.991  | 4.274  | 15.937 | 14.003 |
| 20 | 0.4927 | 6.578  | 11.492 | 8.279  | 15.686 | 13.285 |
| 20 | 0.4937 | 5.242  | 15.446 | 5.354  | 29.588 | 8.420  |
| 20 | 0.4947 | 9.111  | 17.247 | 9.587  | 29.839 | 10.777 |
| 20 | 0.4957 | 10.086 | 18.542 | 13.497 | 19.317 | 11.774 |
| 20 | 0.4967 | 9.378  | 11.064 | 11.635 | 35.599 | 9.454  |
| 20 | 0.4977 | 19.130 | 23.608 | 14.162 | 22.655 | 16.070 |
| 20 | 0.4987 | 13.017 | 17.648 | 10.878 | 22.666 | 13.156 |
| 20 | 0.4997 | 11.195 | 15.467 | 13.573 | 20.261 | 28.848 |
| 20 | 0.5007 | 9.160  | 9.432  | 13.384 | 16.605 | 7.320  |
| 20 | 0.5017 | 8.848  | 16.652 | 12.329 | 22.763 | 9.528  |
| 20 | 0.5027 | 9.548  | 22.554 | 12.979 | 27.139 | 7.053  |
| 20 | 0.5037 | 12.217 | 11.064 | 11.722 | 24.935 | 6.595  |
| 20 | 0.5047 | 13.647 | 13.837 | 12.341 | 25.587 | 7.158  |
| 20 | 0.5057 | 17.492 | 16.133 | 17.393 | 26.304 | 8.678  |
| 20 | 0.5067 | 9.479  | 15.667 | 12.327 | 23.730 | 9.509  |
| 20 | 0.5077 | 15.837 | 15.578 | 15.296 | 21.717 | 20.284 |
| 20 | 0.5087 | 9.305  | 13.741 | 7.566  | 12.843 | 14.433 |
| 20 | 0.5097 | 11.755 | 13.554 | 14.200 | 11.815 | 20.698 |
| 20 | 0.5107 | 26.406 | 20.207 | 20.955 | 19.323 | 22.480 |
| 20 | 0.5117 | 9.912  | 15.129 | 11.165 | 20.559 | 19.057 |
| 20 | 0.5127 | 12.200 | 17.381 | 13.584 | 27.050 | 24.399 |
| 20 | 0.5137 | 16.776 | 20.736 | 16.592 | 27.618 | 23.994 |
| 20 | 0.5147 | 9.675  | 17.193 | 11.117 | 11.668 | 17.172 |
| 20 | 0.5157 | 18.366 | 16.978 | 16.306 | 15.913 | 10.625 |
| 20 | 0.5167 | 5.518  | 8.741  | 6.583  | 23.029 | 13.186 |
| 20 | 0.5177 | 8.506  | 13.570 | 9.574  | 17.328 | 13.808 |
| 20 | 0.5187 | 11.806 | 17.005 | 15.782 | 26.674 | 15.931 |
| 20 | 0.5197 | 7.704  | 7.649  | 9.186  | 10.863 | 7.376  |
| 20 | 0.5207 | 9.438  | 7.316  | 5.732  | 21.784 | 13.118 |
| 20 | 0.5217 | 12.862 | 24.347 | 14.836 | 24.879 | 15.534 |
| 20 | 0.5227 | 16.621 | 13.774 | 13.566 | 26.278 | 8.767  |
| 20 | 0.5237 | 11.814 | 11.880 | 17.331 | 12.560 | 9.653  |

|    |        |        |        |        |        |        |
|----|--------|--------|--------|--------|--------|--------|
| 20 | 0.5247 | 16.922 | 15.015 | 8.678  | 26.646 | 15.759 |
| 20 | 0.5257 | 15.920 | 14.555 | 15.802 | 12.686 | 7.101  |
| 20 | 0.5267 | 7.158  | 10.059 | 7.511  | 16.384 | 8.814  |
| 20 | 0.5277 | 6.952  | 7.851  | 5.640  | 20.322 | 11.973 |
| 20 | 0.5287 | 13.176 | 10.289 | 13.905 | 15.789 | 5.913  |
| 20 | 0.5297 | 9.257  | 12.261 | 11.117 | 18.449 | 6.815  |
| 20 | 0.5307 | 10.238 | 10.002 | 8.502  | 19.752 | 21.322 |
| 20 | 0.5317 | 16.572 | 18.957 | 15.206 | 14.989 | 25.056 |
| 20 | 0.5327 | 14.138 | 22.010 | 13.467 | 20.777 | 21.319 |
| 20 | 0.5337 | 11.752 | 18.837 | 13.165 | 11.730 | 11.144 |
| 20 | 0.5347 | 14.595 | 18.412 | 21.092 | 15.331 | 18.775 |
| 20 | 0.5357 | 16.751 | 21.422 | 22.682 | 15.945 | 19.156 |
| 20 | 0.5367 | 9.004  | 11.508 | 13.357 | 17.571 | 16.919 |
| 20 | 0.5377 | 7.865  | 10.588 | 13.619 | 12.151 | 11.103 |
| 20 | 0.5387 | 13.826 | 16.503 | 14.368 | 15.001 | 17.779 |
| 20 | 0.5397 | 7.942  | 5.643  | 11.320 | 9.769  | 21.030 |
| 20 | 0.5407 | 8.987  | 9.549  | 14.474 | 21.171 | 19.907 |
| 20 | 0.5417 | 18.772 | 17.464 | 15.021 | 14.263 | 22.066 |
| 20 | 0.5427 | 15.359 | 12.491 | 16.483 | 9.478  | 14.983 |
| 20 | 0.5437 | 27.801 | 25.485 | 30.994 | 15.496 | 20.110 |
| 20 | 0.5447 | 19.628 | 9.037  | 16.256 | 11.941 | 11.318 |
| 20 | 0.5457 | 5.162  | 5.487  | 5.382  | 20.970 | 12.165 |
| 20 | 0.5467 | 5.821  | 9.646  | 8.858  | 19.839 | 19.314 |
| 20 | 0.5477 | 8.377  | 13.793 | 14.007 | 22.289 | 17.873 |
| 20 | 0.5487 | 12.441 | 19.225 | 15.444 | 24.064 | 18.279 |
| 20 | 0.5497 | 9.665  | 13.794 | 14.974 | 14.139 | 22.403 |
| 20 | 0.5507 | 13.770 | 9.078  | 14.356 | 14.343 | 26.880 |
| 20 | 0.5517 | 18.175 | 8.927  | 11.883 | 10.499 | 9.662  |
| 20 | 0.5527 | 21.617 | 11.080 | 15.481 | 9.626  | 12.402 |
| 20 | 0.5537 | 13.913 | 9.235  | 11.886 | 15.611 | 13.416 |
| 20 | 0.5547 | 11.037 | 8.518  | 12.973 | 11.577 | 4.591  |
| 20 | 0.5557 | 22.578 | 19.476 | 22.960 | 12.448 | 18.444 |
| 20 | 0.5567 | 17.006 | 11.862 | 21.626 | 18.679 | 16.457 |
| 20 | 0.5577 | 12.593 | 13.388 | 14.436 | 20.984 | 32.454 |
| 20 | 0.5587 | 14.667 | 12.470 | 19.002 | 28.611 | 25.768 |
| 20 | 0.5597 | 13.617 | 14.776 | 18.098 | 22.357 | 19.558 |
| 20 | 0.5607 | 19.420 | 17.969 | 24.104 | 30.187 | 22.995 |
| 20 | 0.5617 | 17.469 | 15.413 | 22.075 | 14.231 | 15.847 |
| 20 | 0.5627 | 11.264 | 12.032 | 15.856 | 11.582 | 16.113 |
| 20 | 0.5637 | 18.079 | 11.998 | 21.714 | 24.868 | 15.267 |
| 20 | 0.5647 | 16.226 | 10.468 | 14.961 | 20.773 | 18.448 |
| 20 | 0.5657 | 19.127 | 11.418 | 16.464 | 21.629 | 19.573 |
| 20 | 0.5667 | 16.544 | 6.419  | 14.186 | 19.570 | 12.156 |
| 20 | 0.5677 | 11.122 | 7.120  | 11.636 | 15.859 | 17.309 |
| 20 | 0.5687 | 19.097 | 20.053 | 25.026 | 25.790 | 23.072 |
| 20 | 0.5697 | 8.852  | 4.945  | 9.059  | 8.791  | 9.798  |
| 20 | 0.5707 | 15.736 | 20.466 | 21.355 | 18.095 | 21.108 |
| 20 | 0.5717 | 6.374  | 6.615  | 5.613  | 5.613  | 7.112  |
| 20 | 0.5727 | 5.414  | 5.409  | 9.377  | 11.286 | 10.578 |
| 20 | 0.5737 | 23.028 | 20.033 | 28.583 | 19.015 | 31.141 |

|    |        |        |        |        |        |        |
|----|--------|--------|--------|--------|--------|--------|
| 20 | 0.5747 | 14.955 | 10.167 | 19.686 | 15.701 | 13.224 |
| 20 | 0.5757 | 13.354 | 11.081 | 13.674 | 11.954 | 16.040 |
| 20 | 0.5767 | 10.435 | 10.778 | 10.507 | 13.680 | 26.676 |
| 20 | 0.5777 | 21.419 | 22.851 | 21.444 | 21.288 | 25.047 |
| 20 | 0.5787 | 18.886 | 18.601 | 14.747 | 18.990 | 35.716 |
| 20 | 0.5797 | 33.580 | 27.653 | 43.317 | 18.228 | 25.568 |
| 20 | 0.5807 | 17.754 | 14.771 | 23.379 | 16.619 | 24.630 |
| 20 | 0.5817 | 17.542 | 12.649 | 16.378 | 24.186 | 15.567 |
| 20 | 0.5827 | 19.381 | 15.940 | 16.228 | 20.809 | 21.253 |
| 20 | 0.5837 | 10.175 | 14.136 | 10.039 | 15.998 | 20.232 |
| 20 | 0.5847 | 18.183 | 15.415 | 13.217 | 35.026 | 34.236 |
| 20 | 0.5857 | 17.426 | 14.392 | 17.960 | 20.958 | 16.456 |
| 20 | 0.5867 | 12.230 | 14.309 | 16.838 | 17.648 | 25.972 |
| 20 | 0.5877 | 9.651  | 7.755  | 8.858  | 19.050 | 15.455 |
| 20 | 0.5887 | 7.978  | 5.435  | 7.031  | 24.450 | 14.756 |
| 20 | 0.5897 | 7.062  | 8.327  | 9.504  | 36.513 | 24.036 |
| 20 | 0.5907 | 14.665 | 8.689  | 13.654 | 24.080 | 18.621 |
| 20 | 0.5917 | 18.202 | 9.788  | 17.534 | 36.122 | 36.337 |
| 20 | 0.5927 | 7.353  | 4.297  | 6.008  | 10.633 | 8.383  |
| 20 | 0.5937 | 17.473 | 11.237 | 20.084 | 13.362 | 10.738 |
| 20 | 0.5947 | 11.157 | 8.164  | 12.904 | 10.895 | 10.196 |
| 20 | 0.5957 | 11.432 | 12.113 | 12.319 | 26.829 | 24.923 |
| 20 | 0.5967 | 11.777 | 16.549 | 15.197 | 27.703 | 28.094 |
| 20 | 0.5977 | 4.910  | 11.591 | 5.593  | 35.610 | 27.919 |
| 20 | 0.5987 | 7.812  | 12.362 | 8.672  | 31.635 | 23.059 |
| 20 | 0.5997 | 8.876  | 10.999 | 10.719 | 31.203 | 29.284 |
| 20 | 0.6007 | 4.654  | 14.001 | 3.328  | 33.838 | 16.020 |
| 20 | 0.6017 | 8.879  | 14.534 | 9.264  | 23.130 | 22.279 |
| 20 | 0.6027 | 14.944 | 19.040 | 10.058 | 20.694 | 17.606 |
| 20 | 0.6037 | 15.023 | 20.034 | 10.604 | 20.839 | 19.668 |
| 20 | 0.6047 | 14.340 | 12.907 | 11.907 | 25.434 | 22.328 |
| 20 | 0.6057 | 7.037  | 11.224 | 14.932 | 20.860 | 17.875 |
| 20 | 0.6067 | 8.131  | 9.721  | 16.824 | 15.798 | 18.648 |
| 20 | 0.6077 | 10.307 | 14.504 | 16.087 | 20.273 | 23.186 |
| 20 | 0.6087 | 22.067 | 17.365 | 22.416 | 14.999 | 12.621 |
| 20 | 0.6097 | 12.254 | 9.305  | 18.300 | 19.872 | 16.245 |
| 20 | 0.6107 | 20.398 | 11.508 | 11.372 | 24.518 | 21.161 |
| 20 | 0.6117 | 11.531 | 9.335  | 13.866 | 23.433 | 15.359 |
| 20 | 0.6127 | 11.402 | 11.517 | 13.835 | 12.870 | 18.791 |
| 20 | 0.6137 | 12.525 | 11.122 | 11.006 | 24.878 | 22.918 |
| 20 | 0.6147 | 13.102 | 12.255 | 15.148 | 22.487 | 18.935 |
| 20 | 0.6157 | 12.296 | 14.984 | 19.637 | 9.837  | 24.296 |
| 20 | 0.6167 | 14.712 | 17.739 | 18.050 | 24.487 | 16.933 |
| 20 | 0.6177 | 13.190 | 16.388 | 15.012 | 25.134 | 17.581 |
| 20 | 0.6187 | 11.294 | 18.050 | 10.716 | 14.882 | 22.222 |
| 20 | 0.6197 | 18.233 | 17.905 | 15.058 | 20.560 | 13.889 |
| 20 | 0.6207 | 9.635  | 17.170 | 14.430 | 33.781 | 12.955 |
| 20 | 0.6217 | 16.865 | 18.138 | 15.895 | 24.266 | 12.156 |
| 20 | 0.6227 | 12.460 | 14.668 | 12.622 | 28.888 | 12.554 |
| 20 | 0.6237 | 10.925 | 9.483  | 12.978 | 11.356 | 9.517  |



|    |        |        |        |        |        |        |
|----|--------|--------|--------|--------|--------|--------|
| 20 | 0.6247 | 11.612 | 7.315  | 12.818 | 16.019 | 11.163 |
| 20 | 0.6257 | 9.514  | 13.878 | 12.972 | 26.250 | 32.820 |
| 20 | 0.6267 | 6.647  | 13.886 | 9.230  | 27.851 | 27.398 |
| 20 | 0.6277 | 8.081  | 10.545 | 15.515 | 14.134 | 20.694 |
| 20 | 0.6287 | 13.011 | 16.841 | 16.879 | 31.483 | 19.225 |
| 20 | 0.6297 | 10.232 | 14.534 | 15.211 | 21.112 | 19.129 |
| 20 | 0.6307 | 9.197  | 17.377 | 16.260 | 19.180 | 14.116 |
| 20 | 0.6317 | 11.206 | 16.602 | 15.559 | 22.505 | 15.128 |
| 20 | 0.6327 | 11.641 | 18.454 | 11.304 | 11.885 | 25.284 |
| 20 | 0.6337 | 14.316 | 17.802 | 12.893 | 11.350 | 18.051 |
| 20 | 0.6347 | 12.454 | 12.348 | 9.424  | 26.967 | 21.740 |
| 20 | 0.6357 | 18.013 | 13.133 | 14.640 | 10.763 | 25.701 |
| 20 | 0.6367 | 12.363 | 11.324 | 7.432  | 25.791 | 17.600 |
| 20 | 0.6377 | 20.259 | 19.537 | 23.424 | 13.487 | 11.678 |
| 20 | 0.6387 | 22.798 | 24.752 | 21.770 | 12.614 | 20.722 |
| 20 | 0.6397 | 18.070 | 16.380 | 17.542 | 8.494  | 17.648 |
| 20 | 0.6407 | 31.051 | 23.330 | 27.586 | 8.190  | 10.798 |
| 20 | 0.6417 | 30.443 | 24.802 | 24.996 | 14.479 | 18.432 |
| 20 | 0.6427 | 15.124 | 14.248 | 8.502  | 17.076 | 12.342 |
| 20 | 0.6437 | 22.086 | 19.958 | 15.689 | 21.563 | 14.789 |
| 20 | 0.6447 | 13.993 | 23.441 | 20.655 | 14.744 | 15.267 |
| 20 | 0.6457 | 9.214  | 14.708 | 8.908  | 6.805  | 9.129  |
| 20 | 0.6467 | 9.770  | 15.844 | 15.035 | 7.361  | 7.158  |
| 20 | 0.6477 | 11.164 | 14.191 | 13.848 | 12.444 | 22.543 |
| 20 | 0.6487 | 13.375 | 13.472 | 17.513 | 13.438 | 27.270 |
| 20 | 0.6497 | 13.371 | 13.485 | 17.481 | 13.420 | 27.352 |
| 20 | 0.6507 | 12.074 | 16.576 | 11.416 | 13.962 | 14.739 |
| 20 | 0.6517 | 13.858 | 22.544 | 13.947 | 12.424 | 28.467 |
| 20 | 0.6527 | 12.130 | 15.848 | 13.733 | 19.477 | 16.615 |
| 20 | 0.6537 | 8.568  | 12.271 | 4.227  | 3.347  | 6.814  |
| 20 | 0.6547 | 18.105 | 18.009 | 14.945 | 8.183  | 13.654 |
| 20 | 0.6557 | 11.429 | 22.424 | 13.094 | 14.490 | 12.644 |
| 20 | 0.6567 | 12.389 | 15.232 | 12.067 | 16.038 | 23.517 |
| 20 | 0.6577 | 17.064 | 18.673 | 21.368 | 13.852 | 7.884  |
| 20 | 0.6587 | 10.809 | 13.560 | 10.443 | 16.585 | 7.155  |
| 20 | 0.6597 | 15.530 | 13.964 | 9.136  | 9.361  | 6.888  |
| 20 | 0.6607 | 15.605 | 18.644 | 14.535 | 19.298 | 18.444 |
| 20 | 0.6617 | 16.647 | 22.472 | 21.446 | 14.507 | 18.821 |
| 20 | 0.6627 | 22.688 | 17.132 | 22.123 | 14.278 | 6.923  |
| 20 | 0.6637 | 15.177 | 10.070 | 11.838 | 18.382 | 10.587 |
| 20 | 0.6647 | 15.146 | 19.853 | 17.801 | 17.403 | 15.527 |
| 20 | 0.6657 | 19.394 | 24.433 | 24.414 | 9.675  | 17.354 |
| 20 | 0.6667 | 29.268 | 24.421 | 24.922 | 8.848  | 25.042 |
| 20 | 0.6677 | 31.217 | 28.241 | 25.300 | 9.399  | 20.652 |
| 20 | 0.6687 | 24.562 | 21.048 | 20.680 | 4.664  | 18.104 |
| 20 | 0.6697 | 39.827 | 26.943 | 29.302 | 7.208  | 13.119 |
| 20 | 0.6707 | 29.381 | 19.588 | 26.037 | 10.817 | 14.461 |
| 20 | 0.6717 | 33.677 | 30.563 | 40.684 | 8.962  | 19.551 |
| 20 | 0.6727 | 27.757 | 24.959 | 24.628 | 11.073 | 20.053 |
| 20 | 0.6737 | 15.712 | 18.766 | 18.601 | 10.817 | 18.920 |

|    |        |        |        |        |        |        |
|----|--------|--------|--------|--------|--------|--------|
| 20 | 0.6747 | 23.887 | 16.806 | 22.429 | 11.604 | 19.060 |
| 20 | 0.6757 | 14.225 | 8.713  | 11.005 | 6.334  | 11.693 |
| 20 | 0.6767 | 28.273 | 35.972 | 31.634 | 14.984 | 19.165 |
| 20 | 0.6777 | 22.293 | 27.827 | 23.339 | 13.655 | 12.702 |
| 20 | 0.6787 | 23.697 | 23.455 | 21.405 | 8.282  | 16.891 |
| 20 | 0.6797 | 24.575 | 22.172 | 21.400 | 14.531 | 21.897 |
| 20 | 0.6807 | 30.319 | 33.825 | 30.638 | 14.404 | 21.661 |
| 20 | 0.6817 | 24.265 | 29.172 | 25.238 | 18.010 | 13.664 |
| 20 | 0.6827 | 26.101 | 31.187 | 27.392 | 15.148 | 14.848 |
| 20 | 0.6837 | 25.477 | 24.648 | 17.617 | 9.666  | 18.100 |
| 20 | 0.6847 | 20.871 | 23.662 | 17.278 | 12.406 | 12.316 |
| 20 | 0.6857 | 20.307 | 18.547 | 16.119 | 12.390 | 10.521 |
| 20 | 0.6867 | 20.952 | 22.034 | 17.823 | 9.025  | 20.866 |
| 20 | 0.6877 | 23.693 | 18.129 | 18.104 | 5.793  | 19.071 |
| 20 | 0.6887 | 15.043 | 17.719 | 15.884 | 6.559  | 21.177 |
| 20 | 0.6897 | 14.929 | 21.221 | 20.279 | 9.160  | 10.924 |
| 20 | 0.6907 | 13.008 | 22.322 | 11.261 | 17.256 | 12.873 |
| 20 | 0.6917 | 22.099 | 21.830 | 22.449 | 11.216 | 20.379 |
| 20 | 0.6927 | 20.778 | 23.605 | 20.491 | 12.628 | 26.705 |
| 20 | 0.6937 | 15.211 | 19.174 | 13.289 | 14.916 | 23.376 |
| 20 | 0.6947 | 26.846 | 36.461 | 30.061 | 17.420 | 26.334 |
| 20 | 0.6957 | 21.105 | 27.074 | 23.064 | 8.845  | 11.363 |
| 20 | 0.6967 | 11.008 | 22.371 | 13.167 | 17.654 | 18.084 |
| 20 | 0.6977 | 21.821 | 27.025 | 24.425 | 11.723 | 12.641 |
| 20 | 0.6987 | 15.015 | 20.493 | 18.969 | 12.693 | 8.373  |
| 20 | 0.6997 | 19.106 | 25.030 | 21.822 | 12.860 | 11.271 |
| 20 | 0.7007 | 34.462 | 32.642 | 31.402 | 9.172  | 14.166 |
| 20 | 0.7017 | 22.921 | 30.082 | 21.120 | 11.725 | 12.672 |
| 20 | 0.7027 | 7.589  | 21.055 | 6.854  | 14.176 | 8.967  |
| 20 | 0.7037 | 7.161  | 13.291 | 6.641  | 13.336 | 12.668 |
| 20 | 0.7047 | 5.537  | 5.730  | 5.809  | 3.820  | 10.975 |
| 20 | 0.7057 | 3.735  | 4.355  | 6.712  | 2.384  | 10.038 |
| 20 | 0.7067 | 19.380 | 21.355 | 24.142 | 6.544  | 15.408 |
| 20 | 0.7077 | 19.416 | 21.197 | 24.100 | 6.424  | 14.951 |
| 20 | 0.7087 | 22.995 | 24.163 | 16.075 | 12.065 | 12.161 |
| 20 | 0.7097 | 20.790 | 19.907 | 19.564 | 9.557  | 13.492 |
| 20 | 0.7107 | 15.684 | 29.799 | 25.109 | 7.056  | 8.062  |
| 20 | 0.7117 | 0.000  | 0.000  | 0.000  | 0.000  | 0.000  |
| 21 | 0.0005 | 0.000  | 0.000  | 0.000  | 0.000  | 0.000  |
| 21 | 0.0015 | 18.491 | 13.919 | 15.248 | 11.801 | 13.071 |
| 21 | 0.0025 | 9.689  | 19.507 | 10.870 | 34.882 | 23.140 |
| 21 | 0.0035 | 13.070 | 9.434  | 8.244  | 29.768 | 11.302 |
| 21 | 0.0045 | 15.016 | 12.755 | 21.848 | 16.584 | 17.992 |
| 21 | 0.0055 | 9.884  | 5.951  | 14.648 | 14.031 | 15.918 |
| 21 | 0.0065 | 10.391 | 7.806  | 17.568 | 25.244 | 25.926 |
| 21 | 0.0075 | 22.855 | 22.728 | 33.239 | 19.065 | 20.708 |
| 21 | 0.0085 | 19.093 | 15.270 | 15.720 | 13.386 | 21.410 |
| 21 | 0.0095 | 22.169 | 15.963 | 24.439 | 17.435 | 14.828 |
| 21 | 0.0105 | 16.952 | 23.213 | 24.039 | 16.230 | 29.787 |
| 21 | 0.0115 | 23.107 | 19.612 | 15.212 | 25.910 | 28.329 |

|    |        |        |        |        |        |        |
|----|--------|--------|--------|--------|--------|--------|
| 21 | 0.0125 | 16.020 | 11.619 | 12.107 | 29.383 | 15.359 |
| 21 | 0.0135 | 15.017 | 7.060  | 8.671  | 25.714 | 29.249 |
| 21 | 0.0145 | 15.432 | 12.354 | 8.460  | 37.193 | 19.679 |
| 21 | 0.0155 | 7.972  | 13.452 | 7.366  | 26.396 | 35.693 |
| 21 | 0.0165 | 7.892  | 12.420 | 8.130  | 22.284 | 25.615 |
| 21 | 0.0175 | 10.364 | 13.086 | 11.879 | 18.225 | 35.508 |
| 21 | 0.0185 | 13.324 | 16.967 | 21.103 | 9.868  | 30.920 |
| 21 | 0.0195 | 13.476 | 11.992 | 13.918 | 14.088 | 36.219 |
| 21 | 0.0205 | 10.713 | 9.905  | 8.192  | 10.171 | 19.832 |
| 21 | 0.0215 | 16.022 | 21.020 | 19.439 | 21.722 | 16.679 |
| 21 | 0.0225 | 8.516  | 15.682 | 11.069 | 14.840 | 11.119 |
| 21 | 0.0235 | 5.173  | 17.083 | 9.397  | 13.873 | 14.364 |
| 21 | 0.0245 | 4.029  | 11.639 | 7.512  | 18.206 | 22.644 |
| 21 | 0.0255 | 7.902  | 8.981  | 6.280  | 19.546 | 8.751  |
| 21 | 0.0265 | 11.820 | 11.523 | 12.659 | 21.005 | 5.952  |
| 21 | 0.0275 | 14.827 | 6.896  | 12.016 | 10.673 | 12.324 |
| 21 | 0.0285 | 18.357 | 13.793 | 16.592 | 9.307  | 17.804 |
| 21 | 0.0295 | 14.817 | 13.019 | 15.817 | 19.020 | 27.731 |
| 21 | 0.0305 | 8.815  | 14.389 | 9.095  | 15.403 | 6.256  |
| 21 | 0.0315 | 17.993 | 14.143 | 11.278 | 20.028 | 12.790 |
| 21 | 0.0325 | 24.144 | 15.250 | 18.420 | 16.741 | 17.834 |
| 21 | 0.0335 | 10.111 | 10.863 | 12.105 | 16.697 | 23.656 |
| 21 | 0.0345 | 29.385 | 23.969 | 29.178 | 25.135 | 13.193 |
| 21 | 0.0355 | 17.077 | 14.256 | 16.735 | 14.505 | 17.430 |
| 21 | 0.0365 | 12.260 | 9.444  | 11.911 | 16.194 | 20.258 |
| 21 | 0.0375 | 18.361 | 19.391 | 20.843 | 13.066 | 23.817 |
| 21 | 0.0385 | 14.803 | 21.283 | 17.361 | 19.469 | 7.250  |
| 21 | 0.0395 | 25.244 | 24.985 | 22.691 | 7.872  | 9.889  |
| 21 | 0.0405 | 20.603 | 22.839 | 22.360 | 20.433 | 9.087  |
| 21 | 0.0415 | 23.908 | 27.151 | 26.666 | 9.325  | 8.144  |
| 21 | 0.0425 | 19.648 | 21.113 | 20.051 | 16.484 | 10.636 |
| 21 | 0.0435 | 18.280 | 23.222 | 21.886 | 20.011 | 15.624 |
| 21 | 0.0445 | 10.844 | 10.222 | 12.026 | 19.565 | 8.986  |
| 21 | 0.0455 | 24.277 | 23.382 | 18.554 | 15.566 | 9.722  |
| 21 | 0.0465 | 35.286 | 33.997 | 29.712 | 11.821 | 23.184 |
| 21 | 0.0475 | 21.497 | 13.670 | 15.137 | 13.291 | 19.174 |
| 21 | 0.0485 | 22.074 | 12.456 | 13.556 | 8.383  | 12.892 |
| 21 | 0.0495 | 22.186 | 12.628 | 13.759 | 8.490  | 12.935 |
| 21 | 0.0505 | 8.988  | 3.642  | 7.239  | 5.052  | 11.326 |
| 21 | 0.0515 | 9.588  | 7.135  | 10.261 | 13.541 | 7.193  |
| 21 | 0.0525 | 12.779 | 8.765  | 12.067 | 5.273  | 14.201 |
| 21 | 0.0535 | 10.392 | 9.897  | 10.358 | 9.680  | 6.770  |
| 21 | 0.0545 | 25.853 | 21.197 | 17.571 | 9.502  | 11.087 |
| 21 | 0.0555 | 25.719 | 21.116 | 17.538 | 9.547  | 10.783 |
| 21 | 0.0565 | 39.145 | 32.139 | 38.233 | 13.995 | 11.323 |
| 21 | 0.0575 | 28.688 | 34.742 | 28.530 | 12.701 | 7.238  |
| 21 | 0.0585 | 21.481 | 19.940 | 20.544 | 12.520 | 10.664 |
| 21 | 0.0595 | 23.576 | 13.138 | 18.941 | 13.214 | 11.585 |
| 21 | 0.0605 | 15.632 | 11.568 | 14.703 | 16.252 | 10.070 |
| 21 | 0.0615 | 22.401 | 20.500 | 25.235 | 17.852 | 7.087  |

|    |        |        |        |        |        |        |
|----|--------|--------|--------|--------|--------|--------|
| 21 | 0.0625 | 24.415 | 20.261 | 17.549 | 20.577 | 20.243 |
| 21 | 0.0635 | 28.406 | 20.830 | 26.315 | 21.791 | 14.628 |
| 21 | 0.0645 | 28.428 | 25.672 | 21.988 | 11.228 | 14.053 |
| 21 | 0.0655 | 22.211 | 21.234 | 19.405 | 18.020 | 19.331 |
| 21 | 0.0665 | 24.561 | 17.154 | 18.798 | 15.516 | 16.508 |
| 21 | 0.0675 | 9.455  | 10.400 | 8.632  | 5.753  | 8.070  |
| 21 | 0.0685 | 33.952 | 28.468 | 29.883 | 26.114 | 9.695  |
| 21 | 0.0695 | 13.521 | 13.279 | 14.447 | 7.996  | 5.920  |
| 21 | 0.0705 | 16.104 | 18.849 | 19.456 | 17.663 | 11.563 |
| 21 | 0.0715 | 15.242 | 14.061 | 12.230 | 15.898 | 6.265  |
| 21 | 0.0725 | 18.706 | 19.891 | 19.074 | 19.442 | 15.014 |
| 21 | 0.0735 | 28.526 | 23.885 | 25.294 | 15.945 | 6.477  |
| 21 | 0.0745 | 33.537 | 29.951 | 33.724 | 25.710 | 6.621  |
| 21 | 0.0755 | 29.919 | 21.034 | 36.803 | 22.192 | 6.039  |
| 21 | 0.0765 | 17.512 | 12.579 | 10.831 | 28.182 | 13.832 |
| 21 | 0.0775 | 11.485 | 13.579 | 13.312 | 15.174 | 3.314  |
| 21 | 0.0785 | 26.565 | 19.106 | 14.748 | 19.721 | 10.529 |
| 21 | 0.0795 | 45.185 | 31.492 | 29.977 | 34.357 | 11.642 |
| 21 | 0.0805 | 9.112  | 9.782  | 8.641  | 12.750 | 4.303  |
| 21 | 0.0815 | 10.216 | 6.403  | 6.565  | 15.700 | 6.149  |
| 21 | 0.0825 | 15.825 | 7.312  | 9.267  | 23.254 | 9.498  |
| 21 | 0.0835 | 25.805 | 12.352 | 19.643 | 7.521  | 12.790 |
| 21 | 0.0845 | 34.296 | 19.289 | 24.819 | 13.122 | 6.991  |
| 21 | 0.0855 | 34.396 | 19.345 | 24.917 | 13.161 | 6.936  |
| 21 | 0.0865 | 43.387 | 24.994 | 33.163 | 14.045 | 6.553  |
| 21 | 0.0875 | 24.892 | 12.545 | 19.093 | 27.990 | 11.561 |
| 21 | 0.0885 | 22.078 | 13.010 | 16.062 | 18.104 | 12.780 |
| 21 | 0.0895 | 13.335 | 9.670  | 9.962  | 21.758 | 16.344 |
| 21 | 0.0905 | 15.711 | 13.789 | 12.976 | 10.689 | 9.112  |
| 21 | 0.0915 | 12.672 | 13.850 | 13.861 | 15.583 | 13.999 |
| 21 | 0.0925 | 11.438 | 12.829 | 11.199 | 17.234 | 10.387 |
| 21 | 0.0935 | 18.746 | 14.794 | 13.431 | 11.867 | 17.096 |
| 21 | 0.0945 | 14.743 | 15.570 | 15.510 | 13.035 | 6.573  |
| 21 | 0.0955 | 15.203 | 18.954 | 14.696 | 18.645 | 7.207  |
| 21 | 0.0965 | 17.461 | 13.063 | 16.174 | 14.343 | 13.320 |
| 21 | 0.0975 | 9.049  | 7.984  | 9.708  | 7.291  | 6.433  |
| 21 | 0.0985 | 7.830  | 8.039  | 6.954  | 14.348 | 7.251  |
| 21 | 0.0995 | 28.732 | 16.612 | 18.657 | 10.065 | 8.562  |
| 21 | 0.1005 | 15.290 | 15.654 | 14.885 | 5.950  | 3.864  |
| 21 | 0.1015 | 20.340 | 16.670 | 18.896 | 22.530 | 11.960 |
| 21 | 0.1025 | 19.018 | 22.566 | 23.067 | 18.809 | 9.615  |
| 21 | 0.1035 | 22.590 | 18.480 | 23.593 | 15.385 | 27.081 |
| 21 | 0.1045 | 19.760 | 10.950 | 19.698 | 14.480 | 15.820 |
| 21 | 0.1055 | 11.437 | 7.729  | 14.975 | 6.927  | 10.181 |
| 21 | 0.1065 | 27.563 | 8.804  | 20.922 | 13.358 | 6.086  |
| 21 | 0.1075 | 24.468 | 23.635 | 24.802 | 9.451  | 13.711 |
| 21 | 0.1085 | 26.714 | 23.952 | 19.981 | 10.556 | 9.755  |
| 21 | 0.1095 | 14.015 | 9.555  | 12.737 | 10.469 | 15.800 |
| 21 | 0.1105 | 31.231 | 23.332 | 17.616 | 14.578 | 17.044 |
| 21 | 0.1115 | 27.864 | 16.207 | 24.129 | 13.016 | 9.108  |

|    |        |        |        |        |        |        |
|----|--------|--------|--------|--------|--------|--------|
| 21 | 0.1125 | 20.926 | 19.131 | 18.109 | 9.946  | 8.601  |
| 21 | 0.1135 | 21.446 | 20.698 | 19.143 | 17.530 | 18.487 |
| 21 | 0.1145 | 27.333 | 20.340 | 21.045 | 13.575 | 16.613 |
| 21 | 0.1155 | 16.587 | 7.762  | 8.502  | 9.458  | 26.901 |
| 21 | 0.1165 | 20.493 | 16.436 | 19.340 | 16.268 | 7.811  |
| 21 | 0.1175 | 14.189 | 11.129 | 14.130 | 14.751 | 7.945  |
| 21 | 0.1185 | 15.529 | 18.111 | 17.369 | 4.318  | 12.470 |
| 21 | 0.1195 | 14.395 | 12.191 | 16.473 | 9.342  | 10.080 |
| 21 | 0.1205 | 29.359 | 22.986 | 19.596 | 10.804 | 28.339 |
| 21 | 0.1215 | 10.208 | 7.957  | 9.774  | 11.820 | 18.279 |
| 21 | 0.1225 | 25.801 | 23.508 | 18.825 | 17.359 | 22.005 |
| 21 | 0.1235 | 18.092 | 14.442 | 14.524 | 14.481 | 20.398 |
| 21 | 0.1245 | 20.308 | 13.505 | 16.888 | 9.623  | 31.668 |
| 21 | 0.1255 | 23.211 | 23.456 | 21.888 | 13.098 | 10.820 |
| 21 | 0.1265 | 14.360 | 15.644 | 10.230 | 10.908 | 12.347 |
| 21 | 0.1275 | 16.642 | 18.221 | 13.056 | 22.022 | 15.103 |
| 21 | 0.1285 | 21.597 | 17.804 | 18.558 | 8.972  | 9.381  |
| 21 | 0.1295 | 23.596 | 19.771 | 19.033 | 12.190 | 12.693 |
| 21 | 0.1305 | 20.782 | 25.900 | 18.206 | 14.759 | 10.372 |
| 21 | 0.1315 | 20.429 | 29.445 | 13.309 | 16.291 | 21.118 |
| 21 | 0.1325 | 23.577 | 25.260 | 18.716 | 17.842 | 3.447  |
| 21 | 0.1335 | 27.649 | 23.788 | 18.077 | 15.372 | 11.905 |
| 21 | 0.1345 | 14.761 | 12.206 | 16.220 | 4.299  | 6.344  |
| 21 | 0.1355 | 27.149 | 23.989 | 22.153 | 3.005  | 6.742  |
| 21 | 0.1365 | 39.167 | 28.470 | 24.493 | 15.033 | 26.026 |
| 21 | 0.1375 | 24.712 | 21.844 | 19.474 | 9.925  | 4.446  |
| 21 | 0.1385 | 40.688 | 21.295 | 37.125 | 12.593 | 4.241  |
| 21 | 0.1395 | 29.718 | 13.431 | 27.298 | 9.533  | 3.479  |
| 21 | 0.1405 | 21.468 | 19.135 | 20.942 | 12.490 | 10.500 |
| 21 | 0.1415 | 20.200 | 19.391 | 15.916 | 15.649 | 12.431 |
| 21 | 0.1425 | 11.647 | 16.805 | 13.714 | 12.525 | 14.977 |
| 21 | 0.1435 | 17.378 | 15.453 | 16.380 | 9.337  | 13.565 |
| 21 | 0.1445 | 21.157 | 22.675 | 23.040 | 17.969 | 10.386 |
| 21 | 0.1455 | 29.415 | 26.565 | 29.799 | 21.267 | 16.872 |
| 21 | 0.1465 | 22.756 | 20.527 | 26.235 | 21.563 | 17.885 |
| 21 | 0.1475 | 22.758 | 20.524 | 26.214 | 21.572 | 17.867 |
| 21 | 0.1485 | 16.265 | 21.717 | 15.098 | 14.849 | 13.672 |
| 21 | 0.1495 | 11.856 | 16.611 | 19.957 | 22.041 | 12.379 |
| 21 | 0.1505 | 33.075 | 25.237 | 32.272 | 14.800 | 12.246 |
| 21 | 0.1515 | 23.126 | 24.581 | 24.223 | 15.073 | 8.949  |
| 21 | 0.1525 | 26.892 | 15.710 | 23.853 | 13.628 | 10.265 |
| 21 | 0.1535 | 24.896 | 20.643 | 23.281 | 16.839 | 10.858 |
| 21 | 0.1545 | 25.589 | 15.272 | 28.898 | 12.668 | 15.186 |
| 21 | 0.1555 | 27.753 | 16.651 | 32.602 | 17.479 | 16.585 |
| 21 | 0.1565 | 26.103 | 23.437 | 27.058 | 5.209  | 9.821  |
| 21 | 0.1575 | 26.515 | 22.237 | 22.385 | 9.191  | 13.554 |
| 21 | 0.1585 | 21.516 | 22.683 | 21.944 | 10.129 | 6.086  |
| 21 | 0.1595 | 16.472 | 15.910 | 16.115 | 10.927 | 10.195 |
| 21 | 0.1605 | 16.173 | 14.731 | 15.299 | 5.463  | 18.211 |
| 21 | 0.1615 | 24.172 | 16.691 | 19.931 | 13.579 | 22.288 |

|    |        |        |        |        |        |        |
|----|--------|--------|--------|--------|--------|--------|
| 21 | 0.1625 | 22.912 | 22.216 | 15.685 | 18.318 | 18.570 |
| 21 | 0.1635 | 27.462 | 23.288 | 23.638 | 13.622 | 15.353 |
| 21 | 0.1645 | 17.487 | 22.483 | 18.885 | 11.180 | 18.851 |
| 21 | 0.1655 | 19.530 | 16.825 | 18.403 | 7.454  | 11.532 |
| 21 | 0.1665 | 20.294 | 17.523 | 17.459 | 9.082  | 14.497 |
| 21 | 0.1675 | 19.100 | 16.519 | 22.431 | 8.367  | 12.840 |
| 21 | 0.1685 | 13.528 | 17.699 | 19.173 | 14.569 | 7.761  |
| 21 | 0.1695 | 11.894 | 16.624 | 15.471 | 16.182 | 9.092  |
| 21 | 0.1705 | 23.433 | 19.648 | 18.788 | 8.241  | 12.875 |
| 21 | 0.1715 | 24.799 | 19.056 | 18.290 | 11.358 | 14.622 |
| 21 | 0.1725 | 13.426 | 16.823 | 16.156 | 16.200 | 24.367 |
| 21 | 0.1735 | 19.756 | 22.315 | 20.986 | 17.639 | 28.173 |
| 21 | 0.1745 | 12.415 | 17.918 | 17.804 | 15.764 | 14.726 |
| 21 | 0.1755 | 23.043 | 18.301 | 22.805 | 9.811  | 17.276 |
| 21 | 0.1765 | 15.365 | 16.793 | 14.559 | 11.288 | 15.117 |
| 21 | 0.1775 | 15.599 | 13.900 | 15.776 | 17.597 | 6.360  |
| 21 | 0.1785 | 11.976 | 11.787 | 12.749 | 12.514 | 6.237  |
| 21 | 0.1795 | 19.522 | 15.237 | 14.909 | 16.192 | 20.889 |
| 21 | 0.1805 | 20.746 | 19.694 | 21.396 | 15.953 | 19.148 |
| 21 | 0.1815 | 12.672 | 18.359 | 16.964 | 10.572 | 9.648  |
| 21 | 0.1825 | 23.653 | 27.875 | 22.427 | 18.676 | 8.370  |
| 21 | 0.1835 | 16.285 | 16.464 | 17.297 | 12.033 | 4.803  |
| 21 | 0.1845 | 15.284 | 20.526 | 17.757 | 5.992  | 18.671 |
| 21 | 0.1855 | 22.635 | 19.903 | 23.068 | 9.370  | 11.505 |
| 21 | 0.1865 | 12.542 | 15.237 | 11.649 | 17.900 | 12.072 |
| 21 | 0.1875 | 8.095  | 17.073 | 7.540  | 19.136 | 6.607  |
| 21 | 0.1885 | 11.806 | 10.755 | 9.719  | 18.687 | 19.566 |
| 21 | 0.1895 | 9.961  | 7.967  | 6.944  | 9.619  | 9.345  |
| 21 | 0.1905 | 9.313  | 15.314 | 13.249 | 15.735 | 11.928 |
| 21 | 0.1915 | 22.330 | 22.053 | 23.945 | 12.859 | 7.511  |
| 21 | 0.1925 | 24.605 | 22.476 | 23.278 | 14.279 | 8.384  |
| 21 | 0.1935 | 18.182 | 17.299 | 23.580 | 12.749 | 6.310  |
| 21 | 0.1945 | 18.172 | 17.241 | 23.581 | 12.757 | 6.294  |
| 21 | 0.1955 | 16.551 | 18.314 | 17.839 | 16.412 | 6.715  |
| 21 | 0.1965 | 17.027 | 20.659 | 20.008 | 16.170 | 12.497 |
| 21 | 0.1975 | 16.848 | 13.463 | 15.218 | 10.922 | 16.282 |
| 21 | 0.1985 | 20.454 | 18.689 | 22.071 | 7.699  | 16.841 |
| 21 | 0.1995 | 18.857 | 16.371 | 19.027 | 13.493 | 20.974 |
| 21 | 0.2005 | 17.198 | 17.328 | 19.813 | 17.519 | 15.899 |
| 21 | 0.2015 | 17.639 | 21.852 | 26.031 | 10.667 | 14.404 |
| 21 | 0.2025 | 19.073 | 23.293 | 26.628 | 7.107  | 12.453 |
| 21 | 0.2035 | 14.030 | 11.392 | 18.812 | 9.806  | 13.198 |
| 21 | 0.2045 | 4.498  | 9.172  | 8.361  | 13.238 | 11.333 |
| 21 | 0.2055 | 7.716  | 14.959 | 9.910  | 17.969 | 10.024 |
| 21 | 0.2065 | 17.211 | 13.658 | 11.199 | 9.959  | 9.392  |
| 21 | 0.2075 | 9.743  | 4.635  | 5.708  | 13.590 | 11.760 |
| 21 | 0.2085 | 13.601 | 9.491  | 13.793 | 8.937  | 9.884  |
| 21 | 0.2095 | 18.652 | 15.709 | 18.878 | 9.312  | 4.639  |
| 21 | 0.2105 | 12.948 | 15.006 | 16.381 | 8.115  | 13.411 |
| 21 | 0.2115 | 14.159 | 16.753 | 15.292 | 11.645 | 17.116 |

|    |        |        |        |        |        |        |
|----|--------|--------|--------|--------|--------|--------|
| 21 | 0.2125 | 24.028 | 16.569 | 17.131 | 15.586 | 16.620 |
| 21 | 0.2135 | 19.193 | 15.759 | 12.577 | 14.554 | 9.541  |
| 21 | 0.2145 | 10.895 | 5.292  | 9.271  | 11.108 | 10.941 |
| 21 | 0.2155 | 15.441 | 8.371  | 10.583 | 10.016 | 14.747 |
| 21 | 0.2165 | 14.412 | 10.633 | 12.547 | 9.289  | 11.819 |
| 21 | 0.2175 | 8.749  | 11.898 | 8.571  | 9.740  | 17.679 |
| 21 | 0.2185 | 6.215  | 5.526  | 5.886  | 9.065  | 9.809  |
| 21 | 0.2195 | 10.490 | 9.524  | 11.312 | 11.983 | 10.462 |
| 21 | 0.2205 | 12.886 | 10.464 | 12.216 | 13.712 | 14.509 |
| 21 | 0.2215 | 12.420 | 9.438  | 9.622  | 12.713 | 13.425 |
| 21 | 0.2225 | 20.713 | 13.424 | 19.219 | 15.712 | 16.622 |
| 21 | 0.2235 | 21.604 | 18.693 | 19.946 | 13.035 | 13.798 |
| 21 | 0.2245 | 14.884 | 12.613 | 11.325 | 12.154 | 16.359 |
| 21 | 0.2255 | 30.501 | 16.330 | 18.907 | 9.973  | 14.022 |
| 21 | 0.2265 | 21.821 | 8.897  | 13.401 | 5.374  | 6.217  |
| 21 | 0.2275 | 5.132  | 1.270  | 3.921  | 3.545  | 1.764  |
| 21 | 0.2285 | 7.546  | 5.400  | 5.771  | 6.605  | 2.590  |
| 21 | 0.2295 | 13.767 | 4.606  | 9.129  | 11.933 | 15.056 |
| 21 | 0.2305 | 6.737  | 7.427  | 7.671  | 2.879  | 9.091  |
| 21 | 0.2315 | 11.614 | 12.936 | 13.976 | 8.529  | 15.041 |
| 21 | 0.2325 | 6.884  | 9.411  | 9.738  | 11.060 | 8.167  |
| 21 | 0.2335 | 15.787 | 15.598 | 18.934 | 15.360 | 13.878 |
| 21 | 0.2345 | 23.249 | 17.941 | 16.963 | 19.128 | 14.945 |
| 21 | 0.2355 | 11.950 | 10.896 | 6.568  | 20.943 | 18.314 |
| 21 | 0.2365 | 11.945 | 10.974 | 6.609  | 21.085 | 18.049 |
| 21 | 0.2375 | 11.941 | 11.055 | 6.650  | 21.225 | 17.780 |
| 21 | 0.2385 | 11.348 | 13.308 | 8.979  | 23.077 | 23.314 |
| 21 | 0.2395 | 8.523  | 11.455 | 8.945  | 16.346 | 5.425  |
| 21 | 0.2405 | 19.711 | 13.654 | 12.158 | 18.444 | 21.532 |
| 21 | 0.2415 | 16.196 | 18.405 | 18.596 | 12.746 | 11.278 |
| 21 | 0.2425 | 11.780 | 7.800  | 10.792 | 3.579  | 15.689 |
| 21 | 0.2435 | 8.037  | 14.897 | 9.985  | 13.676 | 15.645 |
| 21 | 0.2445 | 8.879  | 6.122  | 7.242  | 13.445 | 14.766 |
| 21 | 0.2455 | 11.357 | 7.029  | 8.107  | 14.199 | 20.468 |
| 21 | 0.2465 | 8.699  | 6.484  | 8.500  | 10.355 | 20.993 |
| 21 | 0.2475 | 3.116  | 1.856  | 2.694  | 3.798  | 2.262  |
| 21 | 0.2485 | 11.268 | 14.977 | 13.270 | 4.846  | 14.407 |
| 21 | 0.2495 | 7.028  | 6.614  | 5.827  | 15.766 | 14.093 |
| 21 | 0.2505 | 9.397  | 7.093  | 7.189  | 20.605 | 14.015 |
| 21 | 0.2515 | 7.958  | 4.627  | 6.109  | 19.784 | 18.435 |
| 21 | 0.2525 | 7.556  | 5.327  | 7.095  | 10.062 | 7.965  |
| 21 | 0.2535 | 7.582  | 4.431  | 4.868  | 7.162  | 5.763  |
| 21 | 0.2545 | 4.928  | 6.536  | 3.328  | 18.633 | 13.430 |
| 21 | 0.2555 | 14.941 | 19.086 | 13.851 | 12.762 | 15.718 |
| 21 | 0.2565 | 13.666 | 17.995 | 11.848 | 8.755  | 18.348 |
| 21 | 0.2575 | 16.312 | 20.016 | 11.816 | 22.831 | 18.590 |
| 21 | 0.2585 | 16.979 | 25.487 | 18.367 | 18.097 | 7.876  |
| 21 | 0.2595 | 21.934 | 20.390 | 17.391 | 10.105 | 11.444 |
| 21 | 0.2605 | 10.783 | 11.843 | 11.977 | 15.403 | 8.731  |
| 21 | 0.2615 | 9.901  | 11.211 | 10.403 | 14.249 | 5.582  |

|    |        |        |        |        |        |        |
|----|--------|--------|--------|--------|--------|--------|
| 21 | 0.2625 | 9.436  | 12.671 | 10.339 | 10.561 | 4.214  |
| 21 | 0.2635 | 8.629  | 16.278 | 8.778  | 8.188  | 1.234  |
| 21 | 0.2645 | 13.666 | 13.916 | 9.653  | 18.713 | 18.543 |
| 21 | 0.2655 | 11.715 | 12.291 | 6.974  | 20.509 | 13.846 |
| 21 | 0.2665 | 10.451 | 6.329  | 7.627  | 22.601 | 20.673 |
| 21 | 0.2675 | 12.723 | 17.635 | 17.675 | 14.166 | 16.412 |
| 21 | 0.2685 | 10.471 | 13.405 | 10.958 | 11.326 | 9.822  |
| 21 | 0.2695 | 15.748 | 18.947 | 12.496 | 18.735 | 19.901 |
| 21 | 0.2705 | 12.092 | 12.493 | 9.316  | 16.396 | 17.648 |
| 21 | 0.2715 | 12.225 | 13.370 | 7.959  | 8.549  | 15.030 |
| 21 | 0.2725 | 8.856  | 10.805 | 9.957  | 9.824  | 16.243 |
| 21 | 0.2735 | 17.032 | 10.382 | 11.148 | 11.495 | 26.892 |
| 21 | 0.2745 | 16.635 | 14.364 | 19.424 | 16.156 | 20.000 |
| 21 | 0.2755 | 16.534 | 18.652 | 15.359 | 6.837  | 12.001 |
| 21 | 0.2765 | 11.329 | 15.264 | 14.796 | 9.877  | 11.861 |
| 21 | 0.2775 | 4.737  | 10.964 | 4.380  | 8.838  | 10.419 |
| 21 | 0.2785 | 10.357 | 7.545  | 7.548  | 5.690  | 18.804 |
| 21 | 0.2795 | 2.921  | 4.085  | 5.161  | 8.180  | 9.587  |
| 21 | 0.2805 | 11.255 | 13.950 | 13.659 | 11.074 | 15.858 |
| 21 | 0.2815 | 19.751 | 13.031 | 9.994  | 18.382 | 30.158 |
| 21 | 0.2825 | 7.496  | 5.242  | 2.556  | 12.021 | 27.348 |
| 21 | 0.2835 | 34.132 | 32.139 | 29.769 | 14.025 | 30.938 |
| 21 | 0.2845 | 23.731 | 22.752 | 21.040 | 14.153 | 17.763 |
| 21 | 0.2855 | 15.584 | 6.736  | 12.920 | 9.630  | 10.047 |
| 21 | 0.2865 | 4.562  | 4.198  | 2.310  | 9.571  | 17.342 |
| 21 | 0.2875 | 3.679  | 5.221  | 6.505  | 11.611 | 14.573 |
| 21 | 0.2885 | 10.957 | 14.124 | 12.344 | 14.495 | 7.871  |
| 21 | 0.2895 | 9.706  | 6.523  | 4.615  | 15.637 | 10.594 |
| 21 | 0.2905 | 9.420  | 13.002 | 11.654 | 8.896  | 11.587 |
| 21 | 0.2915 | 9.420  | 13.025 | 11.656 | 8.975  | 11.592 |
| 21 | 0.2925 | 12.761 | 5.505  | 7.726  | 11.665 | 24.629 |
| 21 | 0.2935 | 6.629  | 7.562  | 6.438  | 5.873  | 11.608 |
| 21 | 0.2945 | 9.912  | 7.663  | 9.485  | 3.188  | 5.732  |
| 21 | 0.2955 | 7.794  | 4.324  | 6.645  | 6.619  | 6.759  |
| 21 | 0.2965 | 8.645  | 4.640  | 6.561  | 6.559  | 5.912  |
| 21 | 0.2975 | 5.663  | 2.378  | 2.506  | 5.300  | 7.289  |
| 21 | 0.2985 | 10.336 | 7.092  | 10.489 | 11.453 | 13.236 |
| 21 | 0.2995 | 11.603 | 11.855 | 12.599 | 12.413 | 5.987  |
| 21 | 0.3005 | 14.009 | 12.769 | 16.223 | 14.369 | 16.930 |
| 21 | 0.3015 | 13.773 | 10.746 | 10.960 | 8.937  | 11.046 |
| 21 | 0.3025 | 7.175  | 4.576  | 9.440  | 5.757  | 19.743 |
| 21 | 0.3035 | 5.259  | 2.971  | 5.446  | 4.533  | 19.680 |
| 21 | 0.3045 | 3.041  | 1.943  | 2.721  | 3.432  | 12.468 |
| 21 | 0.3055 | 9.903  | 5.902  | 7.005  | 6.530  | 5.315  |
| 21 | 0.3065 | 14.446 | 6.739  | 11.907 | 5.537  | 5.709  |
| 21 | 0.3075 | 26.080 | 12.291 | 22.107 | 13.437 | 12.960 |
| 21 | 0.3085 | 5.533  | 4.366  | 6.215  | 20.350 | 24.532 |
| 21 | 0.3095 | 2.152  | 10.298 | 3.222  | 18.431 | 12.340 |
| 21 | 0.3105 | 8.713  | 6.537  | 4.629  | 9.007  | 10.846 |
| 21 | 0.3115 | 15.429 | 16.028 | 15.030 | 23.673 | 19.898 |



|    |        |        |        |        |        |        |
|----|--------|--------|--------|--------|--------|--------|
| 21 | 0.3125 | 15.627 | 21.530 | 19.372 | 23.998 | 22.716 |
| 21 | 0.3135 | 8.025  | 9.394  | 12.588 | 10.139 | 15.353 |
| 21 | 0.3145 | 16.402 | 18.227 | 19.631 | 18.657 | 23.113 |
| 21 | 0.3155 | 10.428 | 13.859 | 14.017 | 15.448 | 21.555 |
| 21 | 0.3165 | 17.153 | 17.265 | 18.198 | 5.279  | 10.762 |
| 21 | 0.3175 | 15.649 | 16.645 | 17.459 | 6.709  | 19.279 |
| 21 | 0.3185 | 31.195 | 26.218 | 28.330 | 12.122 | 19.083 |
| 21 | 0.3195 | 17.263 | 23.280 | 22.290 | 7.806  | 12.558 |
| 21 | 0.3205 | 12.481 | 17.231 | 13.476 | 7.201  | 21.679 |
| 21 | 0.3215 | 12.733 | 18.017 | 12.652 | 10.861 | 26.726 |
| 21 | 0.3225 | 13.510 | 13.929 | 13.640 | 12.488 | 15.301 |
| 21 | 0.3235 | 15.967 | 16.638 | 14.799 | 11.526 | 15.953 |
| 21 | 0.3245 | 21.071 | 20.536 | 20.956 | 18.319 | 24.791 |
| 21 | 0.3255 | 29.996 | 18.864 | 25.828 | 15.707 | 22.543 |
| 21 | 0.3265 | 20.018 | 12.345 | 17.917 | 5.601  | 9.739  |
| 21 | 0.3275 | 29.587 | 21.339 | 26.836 | 4.500  | 8.465  |
| 21 | 0.3285 | 9.539  | 15.684 | 10.156 | 11.669 | 11.301 |
| 21 | 0.3295 | 9.801  | 13.282 | 8.769  | 19.407 | 18.154 |
| 21 | 0.3305 | 14.618 | 13.806 | 11.226 | 20.068 | 28.382 |
| 21 | 0.3315 | 12.011 | 15.050 | 14.005 | 14.952 | 29.729 |
| 21 | 0.3325 | 18.072 | 13.427 | 12.957 | 16.868 | 37.972 |
| 21 | 0.3335 | 11.272 | 21.737 | 14.652 | 13.064 | 18.979 |
| 21 | 0.3345 | 19.546 | 18.147 | 14.794 | 13.124 | 28.074 |
| 21 | 0.3355 | 14.082 | 13.329 | 10.951 | 7.564  | 11.565 |
| 21 | 0.3365 | 10.941 | 11.273 | 11.836 | 8.244  | 21.439 |
| 21 | 0.3375 | 21.089 | 17.198 | 14.273 | 12.985 | 24.738 |
| 21 | 0.3385 | 10.663 | 12.172 | 10.700 | 11.775 | 21.305 |
| 21 | 0.3395 | 19.347 | 14.829 | 19.856 | 13.315 | 17.168 |
| 21 | 0.3405 | 8.820  | 8.160  | 9.741  | 14.829 | 12.665 |
| 21 | 0.3415 | 14.720 | 15.085 | 12.000 | 14.854 | 21.124 |
| 21 | 0.3425 | 11.069 | 12.413 | 11.969 | 11.614 | 4.337  |
| 21 | 0.3435 | 5.839  | 2.860  | 4.811  | 11.806 | 33.432 |
| 21 | 0.3445 | 11.613 | 10.451 | 14.720 | 16.591 | 30.681 |
| 21 | 0.3455 | 19.376 | 15.675 | 27.167 | 16.595 | 33.715 |
| 21 | 0.3465 | 10.995 | 12.023 | 15.920 | 19.018 | 27.275 |
| 21 | 0.3475 | 14.493 | 11.977 | 17.463 | 16.876 | 18.952 |
| 21 | 0.3485 | 10.680 | 10.419 | 12.349 | 14.071 | 14.858 |
| 21 | 0.3495 | 12.308 | 8.749  | 12.867 | 7.259  | 11.864 |
| 21 | 0.3505 | 11.632 | 7.057  | 10.728 | 12.007 | 11.350 |
| 21 | 0.3515 | 12.562 | 7.305  | 8.203  | 15.265 | 7.436  |
| 21 | 0.3525 | 10.052 | 13.819 | 6.482  | 21.889 | 20.921 |
| 21 | 0.3535 | 7.793  | 8.924  | 7.536  | 9.346  | 10.223 |
| 21 | 0.3545 | 14.829 | 11.233 | 12.325 | 12.516 | 12.686 |
| 21 | 0.3555 | 12.638 | 7.462  | 7.747  | 22.477 | 24.360 |
| 21 | 0.3565 | 16.166 | 9.308  | 15.010 | 14.976 | 21.690 |
| 21 | 0.3575 | 12.573 | 9.056  | 8.554  | 9.207  | 13.421 |
| 21 | 0.3585 | 20.679 | 15.768 | 16.784 | 11.826 | 11.228 |
| 21 | 0.3595 | 15.021 | 8.010  | 12.677 | 28.988 | 27.248 |
| 21 | 0.3605 | 5.324  | 10.446 | 11.397 | 16.191 | 21.509 |
| 21 | 0.3615 | 13.967 | 17.935 | 14.842 | 31.250 | 39.833 |

|    |        |        |        |        |        |        |
|----|--------|--------|--------|--------|--------|--------|
| 21 | 0.3625 | 15.877 | 18.098 | 18.754 | 36.603 | 34.173 |
| 21 | 0.3635 | 11.420 | 5.710  | 8.587  | 18.575 | 31.031 |
| 21 | 0.3645 | 20.884 | 10.373 | 10.710 | 8.410  | 34.518 |
| 21 | 0.3655 | 21.707 | 17.027 | 11.891 | 22.238 | 34.891 |
| 21 | 0.3665 | 12.551 | 9.326  | 5.796  | 23.548 | 12.909 |
| 21 | 0.3675 | 12.592 | 16.076 | 14.603 | 28.897 | 31.036 |
| 21 | 0.3685 | 16.769 | 18.216 | 15.605 | 19.050 | 21.339 |
| 21 | 0.3695 | 13.478 | 13.881 | 13.400 | 24.442 | 33.154 |
| 21 | 0.3705 | 16.675 | 15.569 | 17.484 | 31.704 | 32.156 |
| 21 | 0.3715 | 12.348 | 14.632 | 13.571 | 13.486 | 31.029 |
| 21 | 0.3725 | 9.351  | 3.717  | 7.799  | 10.967 | 24.042 |
| 21 | 0.3735 | 9.236  | 3.610  | 7.733  | 10.883 | 23.859 |
| 21 | 0.3745 | 13.033 | 6.028  | 8.759  | 14.880 | 15.628 |
| 21 | 0.3755 | 15.530 | 13.221 | 13.573 | 22.246 | 21.600 |
| 21 | 0.3765 | 14.548 | 13.714 | 13.798 | 27.592 | 23.742 |
| 21 | 0.3775 | 16.697 | 13.449 | 17.054 | 29.505 | 18.002 |
| 21 | 0.3785 | 16.563 | 18.527 | 19.090 | 29.942 | 14.813 |
| 21 | 0.3795 | 15.706 | 16.129 | 20.375 | 28.867 | 25.308 |
| 21 | 0.3805 | 12.981 | 15.589 | 16.728 | 22.270 | 24.248 |
| 21 | 0.3815 | 14.358 | 13.959 | 14.083 | 28.801 | 26.908 |
| 21 | 0.3825 | 10.016 | 8.033  | 9.926  | 20.941 | 27.331 |
| 21 | 0.3835 | 13.074 | 9.573  | 14.888 | 13.196 | 13.369 |
| 21 | 0.3845 | 11.714 | 16.638 | 17.308 | 15.427 | 12.649 |
| 21 | 0.3855 | 36.124 | 24.273 | 23.329 | 13.117 | 29.154 |
| 21 | 0.3865 | 23.402 | 18.853 | 20.647 | 12.835 | 29.109 |
| 21 | 0.3875 | 23.254 | 16.303 | 17.549 | 21.022 | 18.410 |
| 21 | 0.3885 | 7.403  | 9.422  | 6.859  | 30.596 | 24.276 |
| 21 | 0.3895 | 7.597  | 10.412 | 9.398  | 7.747  | 9.832  |
| 21 | 0.3905 | 13.178 | 22.518 | 18.033 | 23.084 | 19.873 |
| 21 | 0.3915 | 10.069 | 17.716 | 15.427 | 15.688 | 23.737 |
| 21 | 0.3925 | 8.913  | 9.424  | 7.057  | 15.659 | 18.080 |
| 21 | 0.3935 | 19.018 | 19.477 | 20.550 | 22.228 | 21.422 |
| 21 | 0.3945 | 7.175  | 16.635 | 13.653 | 20.830 | 30.245 |
| 21 | 0.3955 | 13.870 | 16.394 | 17.979 | 32.357 | 28.674 |
| 21 | 0.3965 | 7.928  | 6.379  | 11.002 | 17.412 | 23.413 |
| 21 | 0.3975 | 10.746 | 7.520  | 7.452  | 25.964 | 29.839 |
| 21 | 0.3985 | 10.933 | 9.876  | 12.644 | 7.768  | 13.479 |
| 21 | 0.3995 | 29.208 | 22.813 | 24.073 | 16.983 | 20.958 |
| 21 | 0.4005 | 16.110 | 15.530 | 14.350 | 23.942 | 15.725 |
| 21 | 0.4015 | 13.200 | 14.464 | 10.589 | 27.609 | 31.051 |
| 21 | 0.4025 | 9.829  | 9.837  | 15.466 | 19.420 | 26.321 |
| 21 | 0.4035 | 5.863  | 9.332  | 5.284  | 28.782 | 19.920 |
| 21 | 0.4045 | 14.619 | 12.975 | 13.787 | 29.166 | 29.131 |
| 21 | 0.4055 | 21.114 | 24.727 | 19.758 | 16.707 | 11.494 |
| 21 | 0.4065 | 6.987  | 4.154  | 6.212  | 2.706  | 2.789  |
| 21 | 0.4075 | 12.251 | 9.688  | 10.751 | 18.554 | 23.489 |
| 21 | 0.4085 | 12.392 | 7.373  | 11.691 | 12.978 | 19.725 |
| 21 | 0.4095 | 12.774 | 15.557 | 13.452 | 19.471 | 18.210 |
| 21 | 0.4105 | 17.416 | 13.905 | 20.514 | 17.963 | 16.865 |
| 21 | 0.4115 | 17.969 | 19.828 | 22.499 | 9.582  | 12.595 |

|    |        |        |        |        |        |        |
|----|--------|--------|--------|--------|--------|--------|
| 21 | 0.4125 | 12.282 | 11.190 | 17.259 | 14.622 | 11.199 |
| 21 | 0.4135 | 16.166 | 10.701 | 17.019 | 20.084 | 21.195 |
| 21 | 0.4145 | 15.992 | 16.684 | 18.763 | 16.815 | 19.286 |
| 21 | 0.4155 | 23.171 | 18.390 | 17.612 | 18.269 | 22.920 |
| 21 | 0.4165 | 28.910 | 15.529 | 21.338 | 21.991 | 25.259 |
| 21 | 0.4175 | 30.860 | 25.209 | 27.109 | 14.073 | 32.192 |
| 21 | 0.4185 | 14.059 | 18.535 | 16.523 | 15.768 | 25.724 |
| 21 | 0.4195 | 25.995 | 24.042 | 20.184 | 23.567 | 24.779 |
| 21 | 0.4205 | 20.432 | 20.043 | 21.041 | 25.112 | 22.594 |
| 21 | 0.4215 | 18.920 | 10.689 | 16.209 | 16.882 | 17.317 |
| 21 | 0.4225 | 10.743 | 12.660 | 13.247 | 15.546 | 14.415 |
| 21 | 0.4235 | 10.692 | 12.462 | 13.064 | 15.381 | 14.297 |
| 21 | 0.4245 | 14.056 | 15.705 | 7.948  | 15.645 | 19.546 |
| 21 | 0.4255 | 15.062 | 10.887 | 12.273 | 5.732  | 12.681 |
| 21 | 0.4265 | 10.277 | 10.103 | 9.901  | 5.837  | 13.242 |
| 21 | 0.4275 | 17.183 | 19.068 | 17.302 | 13.576 | 17.703 |
| 21 | 0.4285 | 16.699 | 14.672 | 18.399 | 10.151 | 19.176 |
| 21 | 0.4295 | 9.943  | 6.101  | 7.184  | 4.211  | 8.619  |
| 21 | 0.4305 | 10.639 | 8.205  | 13.249 | 10.069 | 14.262 |
| 21 | 0.4315 | 18.103 | 18.636 | 19.085 | 15.593 | 29.262 |
| 21 | 0.4325 | 8.735  | 10.873 | 9.954  | 23.779 | 28.415 |
| 21 | 0.4335 | 14.476 | 15.744 | 14.400 | 19.212 | 17.891 |
| 21 | 0.4345 | 16.387 | 16.446 | 17.328 | 16.384 | 21.498 |
| 21 | 0.4355 | 3.959  | 8.647  | 4.643  | 21.113 | 13.424 |
| 21 | 0.4365 | 11.520 | 12.641 | 12.176 | 14.168 | 14.462 |
| 21 | 0.4375 | 13.978 | 14.715 | 14.165 | 17.539 | 17.873 |
| 21 | 0.4385 | 11.811 | 14.819 | 7.355  | 15.425 | 19.074 |
| 21 | 0.4395 | 23.599 | 16.399 | 18.280 | 16.010 | 28.119 |
| 21 | 0.4405 | 23.816 | 17.822 | 20.489 | 12.758 | 25.632 |
| 21 | 0.4415 | 9.010  | 11.046 | 9.286  | 18.476 | 18.176 |
| 21 | 0.4425 | 10.467 | 13.398 | 14.537 | 20.490 | 25.548 |
| 21 | 0.4435 | 4.313  | 5.804  | 4.434  | 12.827 | 22.830 |
| 21 | 0.4445 | 18.188 | 11.210 | 12.990 | 12.353 | 18.560 |
| 21 | 0.4455 | 17.423 | 12.378 | 17.707 | 15.516 | 20.857 |
| 21 | 0.4465 | 14.934 | 15.060 | 12.637 | 6.395  | 15.880 |
| 21 | 0.4475 | 8.785  | 11.333 | 9.468  | 4.054  | 3.952  |
| 21 | 0.4485 | 6.384  | 8.767  | 8.076  | 3.864  | 9.921  |
| 21 | 0.4495 | 7.362  | 10.562 | 9.142  | 8.871  | 9.326  |
| 21 | 0.4505 | 10.025 | 4.545  | 9.026  | 9.619  | 15.051 |
| 21 | 0.4515 | 8.309  | 6.939  | 7.818  | 9.153  | 13.287 |
| 21 | 0.4525 | 10.543 | 7.980  | 8.800  | 14.170 | 14.966 |
| 21 | 0.4535 | 12.772 | 8.416  | 10.620 | 13.136 | 15.336 |
| 21 | 0.4545 | 6.138  | 12.054 | 8.119  | 16.038 | 20.614 |
| 21 | 0.4555 | 4.875  | 6.866  | 4.491  | 12.405 | 22.339 |
| 21 | 0.4565 | 6.757  | 9.450  | 6.730  | 15.376 | 23.530 |
| 21 | 0.4575 | 6.835  | 11.150 | 10.427 | 15.018 | 25.385 |
| 21 | 0.4585 | 12.286 | 13.883 | 17.394 | 16.454 | 23.871 |
| 21 | 0.4595 | 12.549 | 13.309 | 15.260 | 13.369 | 15.915 |
| 21 | 0.4605 | 11.833 | 14.627 | 15.424 | 11.309 | 14.836 |
| 21 | 0.4615 | 11.140 | 15.194 | 12.927 | 12.377 | 18.894 |

|    |        |        |        |        |        |        |
|----|--------|--------|--------|--------|--------|--------|
| 21 | 0.4625 | 8.156  | 13.943 | 10.274 | 16.377 | 19.140 |
| 21 | 0.4635 | 10.297 | 10.300 | 11.046 | 13.933 | 9.136  |
| 21 | 0.4645 | 15.854 | 11.846 | 15.938 | 11.905 | 12.154 |
| 21 | 0.4655 | 18.151 | 17.378 | 17.816 | 16.572 | 15.251 |
| 21 | 0.4665 | 6.541  | 9.078  | 9.921  | 7.645  | 14.681 |
| 21 | 0.4675 | 5.024  | 6.952  | 6.727  | 7.469  | 7.960  |
| 21 | 0.4685 | 13.379 | 13.456 | 14.849 | 13.218 | 8.716  |
| 21 | 0.4695 | 9.613  | 15.775 | 17.259 | 17.141 | 19.870 |
| 21 | 0.4705 | 11.187 | 6.694  | 8.203  | 16.956 | 24.287 |
| 21 | 0.4715 | 12.313 | 7.987  | 12.254 | 15.119 | 20.606 |
| 21 | 0.4725 | 11.902 | 9.945  | 11.812 | 18.429 | 21.610 |
| 21 | 0.4735 | 14.175 | 16.661 | 17.544 | 18.517 | 14.960 |
| 21 | 0.4745 | 15.264 | 15.455 | 15.198 | 8.690  | 11.227 |
| 21 | 0.4755 | 16.434 | 16.543 | 16.809 | 8.878  | 12.557 |
| 21 | 0.4765 | 15.200 | 14.704 | 15.067 | 8.200  | 4.992  |
| 21 | 0.4775 | 9.911  | 11.469 | 13.843 | 7.422  | 6.862  |
| 21 | 0.4785 | 12.036 | 13.758 | 12.636 | 15.013 | 19.286 |
| 21 | 0.4795 | 13.758 | 14.833 | 16.797 | 13.068 | 12.304 |
| 21 | 0.4805 | 12.304 | 18.033 | 19.165 | 9.062  | 8.753  |
| 21 | 0.4815 | 6.844  | 9.977  | 13.577 | 14.380 | 11.003 |
| 21 | 0.4825 | 7.975  | 8.386  | 11.958 | 11.777 | 7.869  |
| 21 | 0.4835 | 8.174  | 10.987 | 10.318 | 14.681 | 11.560 |
| 21 | 0.4845 | 20.494 | 19.755 | 23.665 | 11.758 | 13.001 |
| 21 | 0.4855 | 15.580 | 14.325 | 25.373 | 10.905 | 8.747  |
| 21 | 0.4865 | 15.553 | 14.284 | 25.350 | 11.019 | 9.044  |
| 21 | 0.4875 | 14.944 | 12.471 | 11.927 | 12.929 | 15.078 |
| 21 | 0.4885 | 13.507 | 8.171  | 15.748 | 18.040 | 38.820 |
| 21 | 0.4895 | 10.336 | 13.592 | 12.760 | 20.671 | 9.212  |
| 21 | 0.4905 | 20.637 | 15.200 | 18.433 | 18.169 | 28.526 |
| 21 | 0.4915 | 15.044 | 13.062 | 18.133 | 17.791 | 23.445 |
| 21 | 0.4925 | 15.373 | 12.203 | 17.894 | 9.007  | 14.288 |
| 21 | 0.4935 | 7.557  | 5.443  | 7.595  | 10.207 | 13.566 |
| 21 | 0.4945 | 14.930 | 8.155  | 17.691 | 11.858 | 11.640 |
| 21 | 0.4955 | 6.194  | 2.823  | 9.838  | 16.144 | 16.414 |
| 21 | 0.4965 | 13.552 | 12.494 | 12.682 | 7.329  | 18.298 |
| 21 | 0.4975 | 9.030  | 8.042  | 10.028 | 20.762 | 18.629 |
| 21 | 0.4985 | 7.861  | 6.331  | 12.406 | 18.375 | 16.844 |
| 21 | 0.4995 | 7.243  | 8.844  | 9.529  | 9.973  | 5.213  |
| 21 | 0.5005 | 14.355 | 7.107  | 15.257 | 8.674  | 16.672 |
| 21 | 0.5015 | 11.856 | 8.782  | 13.233 | 11.611 | 18.500 |
| 21 | 0.5025 | 16.831 | 9.371  | 18.742 | 11.977 | 19.150 |
| 21 | 0.5035 | 18.150 | 8.811  | 20.750 | 13.666 | 9.118  |
| 21 | 0.5045 | 16.554 | 7.356  | 15.443 | 20.363 | 24.213 |
| 21 | 0.5055 | 6.616  | 3.936  | 10.977 | 8.659  | 16.002 |
| 21 | 0.5065 | 10.500 | 4.080  | 12.873 | 24.047 | 36.298 |
| 21 | 0.5075 | 15.456 | 10.188 | 17.198 | 9.806  | 8.925  |
| 21 | 0.5085 | 16.701 | 8.119  | 13.946 | 20.016 | 23.699 |
| 21 | 0.5095 | 14.808 | 7.710  | 15.388 | 19.319 | 31.433 |
| 21 | 0.5105 | 16.479 | 13.854 | 11.735 | 16.232 | 30.331 |
| 21 | 0.5115 | 12.545 | 5.767  | 11.458 | 12.738 | 11.477 |

|    |        |        |        |        |        |        |
|----|--------|--------|--------|--------|--------|--------|
| 21 | 0.5125 | 17.576 | 7.402  | 18.441 | 20.539 | 6.909  |
| 21 | 0.5135 | 18.321 | 12.335 | 18.417 | 14.098 | 5.769  |
| 21 | 0.5145 | 11.403 | 10.087 | 8.938  | 8.213  | 9.337  |
| 21 | 0.5155 | 10.618 | 5.761  | 10.898 | 12.149 | 11.988 |
| 21 | 0.5165 | 16.492 | 9.664  | 14.305 | 22.629 | 23.459 |
| 21 | 0.5175 | 11.504 | 9.328  | 12.004 | 17.914 | 9.643  |
| 21 | 0.5185 | 9.143  | 11.329 | 6.253  | 12.155 | 7.469  |
| 21 | 0.5195 | 15.767 | 21.714 | 17.468 | 10.492 | 17.529 |
| 21 | 0.5205 | 13.567 | 8.498  | 19.082 | 10.385 | 9.127  |
| 21 | 0.5215 | 6.141  | 4.396  | 7.509  | 6.490  | 6.210  |
| 21 | 0.5225 | 7.189  | 4.075  | 6.008  | 12.154 | 9.840  |
| 21 | 0.5235 | 16.969 | 10.912 | 13.835 | 13.483 | 8.208  |
| 21 | 0.5245 | 8.660  | 11.152 | 14.151 | 16.618 | 12.709 |
| 21 | 0.5255 | 3.863  | 8.657  | 8.634  | 10.715 | 7.028  |
| 21 | 0.5265 | 13.411 | 8.226  | 15.564 | 23.319 | 11.208 |
| 21 | 0.5275 | 15.280 | 13.922 | 13.571 | 13.893 | 10.914 |
| 21 | 0.5285 | 10.278 | 10.651 | 9.839  | 8.051  | 11.453 |
| 21 | 0.5295 | 9.139  | 12.660 | 12.818 | 11.680 | 8.043  |
| 21 | 0.5305 | 22.542 | 13.644 | 21.617 | 20.364 | 22.794 |
| 21 | 0.5315 | 11.504 | 6.813  | 12.527 | 18.990 | 9.785  |
| 21 | 0.5325 | 7.556  | 8.786  | 8.877  | 18.355 | 9.477  |
| 21 | 0.5335 | 11.063 | 8.941  | 11.435 | 4.256  | 10.090 |
| 21 | 0.5345 | 9.714  | 6.144  | 12.481 | 10.587 | 5.446  |
| 21 | 0.5355 | 16.095 | 10.997 | 14.005 | 25.239 | 13.056 |
| 21 | 0.5365 | 6.253  | 5.661  | 4.904  | 6.692  | 13.526 |
| 21 | 0.5375 | 10.330 | 11.076 | 7.343  | 8.175  | 6.589  |
| 21 | 0.5385 | 12.089 | 11.153 | 6.975  | 14.204 | 11.636 |
| 21 | 0.5395 | 9.575  | 6.413  | 6.944  | 17.192 | 9.995  |
| 21 | 0.5405 | 10.604 | 4.612  | 5.605  | 13.259 | 8.998  |
| 21 | 0.5415 | 17.644 | 8.581  | 17.388 | 10.344 | 9.918  |
| 21 | 0.5425 | 15.945 | 9.763  | 14.817 | 15.873 | 19.003 |
| 21 | 0.5435 | 21.241 | 12.035 | 21.793 | 18.939 | 14.510 |
| 21 | 0.5445 | 13.378 | 9.497  | 10.344 | 9.873  | 15.296 |
| 21 | 0.5455 | 21.055 | 10.871 | 21.621 | 16.213 | 16.531 |
| 21 | 0.5465 | 14.810 | 8.369  | 9.731  | 19.140 | 13.014 |
| 21 | 0.5475 | 16.816 | 13.879 | 13.388 | 19.325 | 16.317 |
| 21 | 0.5485 | 4.792  | 5.681  | 7.078  | 8.852  | 6.617  |
| 21 | 0.5495 | 4.724  | 8.063  | 7.371  | 6.464  | 3.429  |
| 21 | 0.5505 | 11.115 | 6.120  | 7.231  | 6.368  | 6.229  |
| 21 | 0.5515 | 11.896 | 7.773  | 11.586 | 9.613  | 9.161  |
| 21 | 0.5525 | 10.731 | 4.477  | 11.130 | 8.325  | 11.179 |
| 21 | 0.5535 | 13.104 | 7.509  | 11.772 | 24.079 | 12.111 |
| 21 | 0.5545 | 11.458 | 5.135  | 12.794 | 18.081 | 6.838  |
| 21 | 0.5555 | 9.327  | 5.444  | 13.129 | 16.791 | 6.466  |
| 21 | 0.5565 | 10.039 | 17.234 | 13.725 | 19.619 | 8.493  |
| 21 | 0.5575 | 7.109  | 11.018 | 7.674  | 11.969 | 8.393  |
| 21 | 0.5585 | 16.444 | 15.713 | 18.929 | 20.920 | 19.529 |
| 21 | 0.5595 | 16.773 | 10.449 | 14.191 | 13.458 | 15.624 |
| 21 | 0.5605 | 10.700 | 7.082  | 10.634 | 8.191  | 4.590  |
| 21 | 0.5615 | 15.327 | 15.678 | 14.897 | 16.085 | 16.768 |

|    |        |        |        |        |        |        |
|----|--------|--------|--------|--------|--------|--------|
| 21 | 0.5625 | 11.528 | 10.513 | 10.397 | 9.653  | 15.143 |
| 21 | 0.5635 | 8.930  | 5.896  | 7.141  | 12.918 | 13.561 |
| 21 | 0.5645 | 12.845 | 9.089  | 9.741  | 16.149 | 25.179 |
| 21 | 0.5655 | 10.732 | 6.310  | 8.641  | 16.652 | 22.034 |
| 21 | 0.5665 | 7.579  | 9.802  | 11.122 | 15.264 | 10.552 |
| 21 | 0.5675 | 13.014 | 5.531  | 14.191 | 13.770 | 15.917 |
| 21 | 0.5685 | 14.388 | 7.216  | 12.472 | 12.340 | 17.659 |
| 21 | 0.5695 | 13.399 | 8.632  | 12.430 | 17.816 | 26.135 |
| 21 | 0.5705 | 18.261 | 11.268 | 12.835 | 17.168 | 23.112 |
| 21 | 0.5715 | 13.047 | 11.456 | 11.901 | 15.923 | 18.674 |
| 21 | 0.5725 | 16.709 | 23.448 | 15.467 | 12.230 | 16.826 |
| 21 | 0.5735 | 15.830 | 22.037 | 17.685 | 12.868 | 14.661 |
| 21 | 0.5745 | 15.729 | 22.128 | 19.259 | 10.195 | 12.607 |
| 21 | 0.5755 | 14.706 | 10.881 | 9.672  | 7.677  | 16.675 |
| 21 | 0.5765 | 14.619 | 12.822 | 8.739  | 5.853  | 11.690 |
| 21 | 0.5775 | 10.359 | 12.873 | 6.407  | 7.412  | 10.735 |
| 21 | 0.5785 | 13.696 | 12.775 | 9.727  | 12.334 | 8.557  |
| 21 | 0.5795 | 25.466 | 16.814 | 14.954 | 12.126 | 22.948 |
| 21 | 0.5805 | 13.231 | 10.671 | 10.500 | 10.378 | 16.561 |
| 21 | 0.5815 | 6.839  | 8.748  | 3.808  | 7.615  | 14.826 |
| 21 | 0.5825 | 14.767 | 17.211 | 11.695 | 8.790  | 21.913 |
| 21 | 0.5835 | 11.509 | 15.897 | 12.291 | 8.171  | 16.065 |
| 21 | 0.5845 | 15.940 | 16.683 | 12.356 | 19.196 | 20.005 |
| 21 | 0.5855 | 28.731 | 30.998 | 29.990 | 11.141 | 12.818 |
| 21 | 0.5865 | 15.344 | 17.961 | 13.771 | 12.366 | 18.821 |
| 21 | 0.5875 | 16.242 | 16.523 | 13.357 | 15.030 | 18.221 |
| 21 | 0.5885 | 13.447 | 13.655 | 22.886 | 14.783 | 30.971 |
| 21 | 0.5895 | 12.786 | 8.968  | 11.273 | 19.742 | 17.354 |
| 21 | 0.5905 | 15.242 | 17.041 | 16.084 | 13.113 | 22.792 |
| 21 | 0.5915 | 2.780  | 5.520  | 4.897  | 23.274 | 21.521 |
| 21 | 0.5925 | 20.064 | 21.420 | 16.540 | 10.069 | 11.501 |
| 21 | 0.5935 | 12.320 | 15.574 | 9.884  | 16.842 | 15.418 |
| 21 | 0.5945 | 13.852 | 17.772 | 9.750  | 11.828 | 18.099 |
| 21 | 0.5955 | 9.024  | 12.719 | 8.127  | 11.857 | 5.520  |
| 21 | 0.5965 | 19.228 | 24.832 | 21.245 | 10.301 | 16.613 |
| 21 | 0.5975 | 11.099 | 15.650 | 12.977 | 18.448 | 21.320 |
| 21 | 0.5985 | 21.816 | 25.316 | 17.767 | 13.399 | 14.470 |
| 21 | 0.5995 | 19.424 | 13.937 | 16.105 | 21.086 | 17.955 |
| 21 | 0.6005 | 9.756  | 13.211 | 10.543 | 15.978 | 11.807 |
| 21 | 0.6015 | 7.927  | 13.345 | 9.076  | 13.703 | 11.512 |
| 21 | 0.6025 | 15.622 | 22.110 | 20.903 | 27.959 | 12.902 |
| 21 | 0.6035 | 10.933 | 13.125 | 10.742 | 18.363 | 9.435  |
| 21 | 0.6045 | 11.234 | 12.280 | 12.401 | 18.049 | 17.706 |
| 21 | 0.6055 | 10.010 | 20.574 | 18.061 | 13.929 | 18.330 |
| 21 | 0.6065 | 12.509 | 22.141 | 16.092 | 24.324 | 21.715 |
| 21 | 0.6075 | 12.756 | 21.794 | 11.907 | 22.598 | 17.418 |
| 21 | 0.6085 | 6.879  | 18.097 | 9.085  | 22.859 | 15.065 |
| 21 | 0.6095 | 8.138  | 21.817 | 12.390 | 17.223 | 23.531 |
| 21 | 0.6105 | 14.557 | 12.986 | 13.291 | 12.720 | 15.840 |
| 21 | 0.6115 | 13.194 | 24.140 | 9.598  | 24.476 | 12.869 |

|    |        |        |        |        |        |        |
|----|--------|--------|--------|--------|--------|--------|
| 21 | 0.6125 | 11.323 | 16.256 | 14.287 | 18.952 | 13.444 |
| 21 | 0.6135 | 9.142  | 10.813 | 11.533 | 10.625 | 17.828 |
| 21 | 0.6145 | 5.001  | 5.944  | 5.504  | 6.138  | 13.337 |
| 21 | 0.6155 | 9.904  | 19.779 | 15.057 | 16.933 | 12.782 |
| 21 | 0.6165 | 11.240 | 22.342 | 12.901 | 17.141 | 10.931 |
| 21 | 0.6175 | 9.353  | 13.699 | 10.582 | 17.365 | 24.105 |
| 21 | 0.6185 | 9.135  | 10.359 | 12.073 | 17.230 | 22.770 |
| 21 | 0.6195 | 0.977  | 4.622  | 1.954  | 5.268  | 3.206  |
| 21 | 0.6205 | 7.806  | 9.289  | 8.425  | 14.889 | 12.766 |
| 21 | 0.6215 | 10.765 | 13.095 | 10.447 | 14.246 | 13.579 |
| 21 | 0.6225 | 11.232 | 10.377 | 5.381  | 23.230 | 13.798 |
| 21 | 0.6235 | 9.672  | 14.712 | 12.590 | 23.755 | 9.440  |
| 21 | 0.6245 | 18.341 | 23.581 | 21.856 | 22.686 | 16.654 |
| 21 | 0.6255 | 11.073 | 8.464  | 9.504  | 15.905 | 16.324 |
| 21 | 0.6265 | 9.809  | 13.938 | 9.920  | 20.982 | 5.221  |
| 21 | 0.6275 | 11.531 | 14.925 | 13.368 | 12.204 | 11.160 |
| 21 | 0.6285 | 4.883  | 11.580 | 6.299  | 11.010 | 6.716  |
| 21 | 0.6295 | 12.795 | 13.110 | 10.023 | 14.311 | 12.661 |
| 21 | 0.6305 | 19.327 | 15.725 | 14.474 | 11.625 | 11.227 |
| 21 | 0.6315 | 14.911 | 11.441 | 14.467 | 10.568 | 13.392 |
| 21 | 0.6325 | 17.134 | 14.304 | 10.649 | 6.734  | 16.903 |
| 21 | 0.6335 | 11.793 | 17.011 | 10.781 | 12.984 | 12.556 |
| 21 | 0.6345 | 10.400 | 11.778 | 10.515 | 14.468 | 11.242 |
| 21 | 0.6355 | 19.920 | 16.773 | 15.440 | 12.994 | 15.349 |
| 21 | 0.6365 | 12.847 | 12.434 | 14.329 | 9.066  | 5.922  |
| 21 | 0.6375 | 23.524 | 11.892 | 9.917  | 10.868 | 25.705 |
| 21 | 0.6385 | 21.138 | 13.153 | 14.339 | 12.267 | 19.342 |
| 21 | 0.6395 | 25.956 | 16.831 | 16.963 | 14.361 | 17.276 |
| 21 | 0.6405 | 7.366  | 6.948  | 5.365  | 9.281  | 14.630 |
| 21 | 0.6415 | 7.117  | 7.771  | 5.553  | 12.628 | 15.571 |
| 21 | 0.6425 | 10.794 | 13.773 | 9.469  | 5.338  | 6.152  |
| 21 | 0.6435 | 20.765 | 18.613 | 14.470 | 8.602  | 13.634 |
| 21 | 0.6445 | 19.926 | 18.462 | 14.078 | 11.581 | 19.144 |
| 21 | 0.6455 | 6.665  | 8.703  | 4.825  | 9.709  | 14.228 |
| 21 | 0.6465 | 20.822 | 15.512 | 13.114 | 15.655 | 32.056 |
| 21 | 0.6475 | 20.705 | 22.169 | 15.562 | 12.806 | 13.045 |
| 21 | 0.6485 | 4.850  | 4.405  | 3.436  | 9.180  | 13.065 |
| 21 | 0.6495 | 16.116 | 7.313  | 9.745  | 5.888  | 6.315  |
| 21 | 0.6505 | 16.353 | 6.104  | 9.418  | 5.444  | 9.403  |
| 21 | 0.6515 | 16.076 | 6.043  | 9.441  | 5.259  | 8.811  |
| 21 | 0.6525 | 3.133  | 3.293  | 5.550  | 0.834  | 1.235  |
| 21 | 0.6535 | 11.578 | 10.436 | 10.932 | 6.333  | 4.988  |
| 21 | 0.6545 | 15.587 | 14.050 | 10.887 | 12.579 | 13.308 |
| 21 | 0.6555 | 15.649 | 14.118 | 10.969 | 12.590 | 13.308 |
| 21 | 0.6565 | 14.437 | 14.751 | 13.511 | 11.714 | 10.979 |
| 21 | 0.6575 | 19.733 | 25.257 | 20.555 | 11.650 | 17.751 |
| 21 | 0.6585 | 22.151 | 24.694 | 18.008 | 17.943 | 22.890 |
| 21 | 0.6595 | 16.066 | 16.268 | 12.812 | 12.293 | 19.304 |
| 21 | 0.6605 | 11.645 | 6.259  | 8.746  | 10.024 | 21.751 |
| 21 | 0.6615 | 9.661  | 5.962  | 7.166  | 13.065 | 23.392 |

|    |        |        |        |        |        |        |
|----|--------|--------|--------|--------|--------|--------|
| 21 | 0.6625 | 15.679 | 16.949 | 20.084 | 14.373 | 12.080 |
| 21 | 0.6635 | 15.721 | 14.165 | 14.148 | 11.420 | 19.949 |
| 21 | 0.6645 | 12.413 | 14.502 | 13.973 | 6.793  | 10.213 |
| 21 | 0.6655 | 16.483 | 11.630 | 13.217 | 6.669  | 7.943  |
| 21 | 0.6665 | 10.827 | 13.147 | 7.810  | 11.134 | 19.616 |
| 21 | 0.6675 | 0.740  | 0.008  | 0.692  | 2.853  | 0.653  |
| 22 | 0.0007 | 0.000  | 0.000  | 0.000  | 0.000  | 0.000  |
| 22 | 0.0017 | 3.543  | 4.634  | 4.600  | 9.375  | 25.810 |
| 22 | 0.0027 | 14.855 | 12.371 | 14.230 | 10.606 | 19.669 |
| 22 | 0.0037 | 17.059 | 15.732 | 16.995 | 13.472 | 12.619 |
| 22 | 0.0047 | 10.320 | 10.500 | 7.683  | 10.873 | 10.616 |
| 22 | 0.0057 | 10.597 | 10.575 | 7.808  | 10.956 | 10.765 |
| 22 | 0.0067 | 11.195 | 15.140 | 8.598  | 13.298 | 13.925 |
| 22 | 0.0077 | 11.648 | 17.554 | 15.854 | 14.437 | 16.488 |
| 22 | 0.0087 | 12.117 | 11.768 | 13.024 | 7.973  | 10.697 |
| 22 | 0.0097 | 11.763 | 11.746 | 10.086 | 7.715  | 17.180 |
| 22 | 0.0107 | 18.322 | 27.923 | 19.982 | 12.535 | 13.452 |
| 22 | 0.0117 | 12.746 | 21.468 | 17.679 | 7.374  | 16.797 |
| 22 | 0.0127 | 11.308 | 9.357  | 9.462  | 15.573 | 20.667 |
| 22 | 0.0137 | 19.329 | 20.368 | 17.682 | 7.300  | 17.579 |
| 22 | 0.0147 | 11.441 | 13.384 | 13.883 | 10.242 | 10.499 |
| 22 | 0.0157 | 4.622  | 8.323  | 5.699  | 17.786 | 13.823 |
| 22 | 0.0167 | 4.072  | 3.151  | 2.305  | 4.858  | 13.663 |
| 22 | 0.0177 | 5.857  | 5.339  | 3.873  | 10.628 | 16.575 |
| 22 | 0.0187 | 7.462  | 6.516  | 7.320  | 7.124  | 12.866 |
| 22 | 0.0197 | 9.851  | 19.339 | 10.347 | 14.971 | 15.987 |
| 22 | 0.0207 | 8.585  | 6.234  | 3.286  | 10.579 | 20.012 |
| 22 | 0.0217 | 4.864  | 11.295 | 6.646  | 10.614 | 18.430 |
| 22 | 0.0227 | 17.407 | 16.270 | 14.879 | 12.732 | 19.018 |
| 22 | 0.0237 | 9.473  | 15.971 | 13.427 | 13.506 | 19.514 |
| 22 | 0.0247 | 7.791  | 4.842  | 6.593  | 9.067  | 16.599 |
| 22 | 0.0257 | 16.974 | 10.023 | 14.231 | 13.171 | 24.094 |
| 22 | 0.0267 | 14.778 | 6.844  | 13.433 | 5.986  | 14.221 |
| 22 | 0.0277 | 4.288  | 4.319  | 8.122  | 12.959 | 15.549 |
| 22 | 0.0287 | 16.307 | 17.531 | 16.231 | 14.078 | 19.109 |
| 22 | 0.0297 | 11.597 | 7.180  | 12.164 | 10.642 | 16.185 |
| 22 | 0.0307 | 9.793  | 8.088  | 12.190 | 3.451  | 13.412 |
| 22 | 0.0317 | 12.088 | 8.443  | 10.248 | 13.787 | 18.074 |
| 22 | 0.0327 | 21.942 | 13.687 | 18.510 | 18.917 | 31.138 |
| 22 | 0.0337 | 11.202 | 8.084  | 11.038 | 15.609 | 21.928 |
| 22 | 0.0347 | 11.021 | 10.516 | 10.611 | 9.236  | 16.108 |
| 22 | 0.0357 | 10.871 | 13.205 | 15.489 | 11.698 | 25.312 |
| 22 | 0.0367 | 5.435  | 7.573  | 3.090  | 11.737 | 18.977 |
| 22 | 0.0377 | 4.100  | 6.588  | 2.821  | 12.827 | 20.780 |
| 22 | 0.0387 | 6.596  | 7.528  | 6.208  | 10.593 | 20.252 |
| 22 | 0.0397 | 10.849 | 11.873 | 7.099  | 16.812 | 20.693 |
| 22 | 0.0407 | 17.600 | 7.804  | 15.085 | 11.617 | 22.481 |
| 22 | 0.0417 | 11.799 | 6.749  | 10.515 | 13.292 | 24.313 |
| 22 | 0.0427 | 11.059 | 10.040 | 11.900 | 8.474  | 25.644 |
| 22 | 0.0437 | 12.553 | 11.125 | 11.703 | 9.522  | 19.458 |



|    |        |        |        |        |        |        |
|----|--------|--------|--------|--------|--------|--------|
| 22 | 0.0447 | 11.193 | 11.972 | 15.074 | 6.924  | 5.471  |
| 22 | 0.0457 | 12.201 | 13.712 | 13.666 | 15.649 | 17.733 |
| 22 | 0.0467 | 15.199 | 12.912 | 20.608 | 13.056 | 11.928 |
| 22 | 0.0477 | 24.944 | 13.299 | 19.341 | 9.469  | 24.936 |
| 22 | 0.0487 | 14.429 | 9.405  | 13.885 | 14.089 | 15.733 |
| 22 | 0.0497 | 7.957  | 8.661  | 8.735  | 16.201 | 21.981 |
| 22 | 0.0507 | 15.108 | 7.680  | 11.238 | 8.448  | 7.319  |
| 22 | 0.0517 | 16.897 | 12.847 | 13.669 | 25.302 | 13.015 |
| 22 | 0.0527 | 16.628 | 11.725 | 13.052 | 15.350 | 24.131 |
| 22 | 0.0537 | 15.766 | 12.461 | 11.671 | 15.685 | 17.615 |
| 22 | 0.0547 | 27.030 | 19.323 | 22.876 | 16.018 | 20.375 |
| 22 | 0.0557 | 26.808 | 19.271 | 22.691 | 15.401 | 20.220 |
| 22 | 0.0567 | 12.966 | 8.466  | 13.245 | 8.785  | 24.307 |
| 22 | 0.0577 | 14.979 | 14.161 | 11.512 | 17.814 | 21.907 |
| 22 | 0.0587 | 18.774 | 19.438 | 23.967 | 19.847 | 24.344 |
| 22 | 0.0597 | 7.883  | 6.953  | 8.733  | 11.183 | 14.956 |
| 22 | 0.0607 | 11.657 | 14.489 | 14.061 | 12.636 | 9.400  |
| 22 | 0.0617 | 16.980 | 16.113 | 19.365 | 16.072 | 21.212 |
| 22 | 0.0627 | 17.536 | 14.820 | 15.288 | 7.801  | 11.645 |
| 22 | 0.0637 | 12.137 | 13.054 | 11.873 | 6.928  | 11.169 |
| 22 | 0.0647 | 8.397  | 6.720  | 8.845  | 12.201 | 10.775 |
| 22 | 0.0657 | 17.061 | 14.881 | 17.253 | 16.799 | 18.184 |
| 22 | 0.0667 | 4.674  | 9.204  | 9.976  | 13.806 | 15.010 |
| 22 | 0.0677 | 9.051  | 15.203 | 15.267 | 6.669  | 10.197 |
| 22 | 0.0687 | 10.518 | 9.336  | 11.239 | 7.487  | 9.783  |
| 22 | 0.0697 | 10.648 | 6.795  | 8.790  | 20.505 | 18.941 |
| 22 | 0.0707 | 10.183 | 10.786 | 6.599  | 30.477 | 15.696 |
| 22 | 0.0717 | 6.663  | 11.080 | 9.977  | 10.949 | 19.376 |
| 22 | 0.0727 | 9.546  | 11.403 | 12.896 | 16.157 | 24.622 |
| 22 | 0.0737 | 15.195 | 9.519  | 10.429 | 7.340  | 20.167 |
| 22 | 0.0747 | 8.997  | 9.467  | 8.466  | 18.664 | 17.304 |
| 22 | 0.0757 | 8.721  | 13.749 | 9.651  | 13.160 | 15.864 |
| 22 | 0.0767 | 5.021  | 6.359  | 5.605  | 7.952  | 6.724  |
| 22 | 0.0777 | 7.568  | 5.669  | 8.802  | 9.737  | 11.132 |
| 22 | 0.0787 | 8.420  | 7.320  | 10.824 | 10.963 | 19.720 |
| 22 | 0.0797 | 9.313  | 5.833  | 8.454  | 15.469 | 14.825 |
| 22 | 0.0807 | 4.333  | 6.729  | 4.854  | 14.503 | 10.335 |
| 22 | 0.0817 | 11.879 | 7.468  | 10.116 | 12.482 | 19.911 |
| 22 | 0.0827 | 11.859 | 7.551  | 10.125 | 12.444 | 19.802 |
| 22 | 0.0837 | 12.229 | 19.736 | 12.142 | 20.743 | 17.000 |
| 22 | 0.0847 | 10.495 | 22.740 | 11.985 | 25.592 | 18.990 |
| 22 | 0.0857 | 10.509 | 9.179  | 7.034  | 18.997 | 14.003 |
| 22 | 0.0867 | 5.483  | 5.889  | 5.107  | 15.016 | 11.149 |
| 22 | 0.0877 | 8.226  | 6.332  | 6.697  | 18.475 | 22.798 |
| 22 | 0.0887 | 5.801  | 6.624  | 6.157  | 24.305 | 12.921 |
| 22 | 0.0897 | 8.873  | 11.107 | 12.560 | 20.180 | 16.236 |
| 22 | 0.0907 | 5.657  | 9.318  | 5.420  | 15.675 | 8.547  |
| 22 | 0.0917 | 6.540  | 7.663  | 7.864  | 7.421  | 6.355  |
| 22 | 0.0927 | 6.757  | 6.411  | 8.633  | 16.385 | 14.088 |
| 22 | 0.0937 | 11.225 | 5.882  | 6.634  | 11.478 | 9.730  |

|    |        |        |        |        |        |        |
|----|--------|--------|--------|--------|--------|--------|
| 22 | 0.0947 | 15.222 | 5.330  | 13.656 | 12.156 | 4.917  |
| 22 | 0.0957 | 9.380  | 13.566 | 9.625  | 21.791 | 10.584 |
| 22 | 0.0967 | 6.016  | 8.137  | 6.242  | 16.721 | 15.156 |
| 22 | 0.0977 | 12.642 | 9.226  | 5.986  | 14.599 | 17.127 |
| 22 | 0.0987 | 4.862  | 10.539 | 4.552  | 20.670 | 10.773 |
| 22 | 0.0997 | 8.150  | 10.311 | 9.903  | 18.902 | 8.486  |
| 22 | 0.1007 | 8.938  | 8.586  | 11.745 | 20.597 | 18.102 |
| 22 | 0.1017 | 6.463  | 10.024 | 10.465 | 12.366 | 14.071 |
| 22 | 0.1027 | 6.190  | 9.841  | 7.355  | 11.551 | 14.803 |
| 22 | 0.1037 | 16.321 | 15.838 | 18.356 | 28.912 | 9.055  |
| 22 | 0.1047 | 9.790  | 12.332 | 11.123 | 26.848 | 8.308  |
| 22 | 0.1057 | 11.673 | 11.810 | 13.123 | 13.041 | 10.016 |
| 22 | 0.1067 | 8.924  | 3.776  | 7.722  | 10.600 | 11.035 |
| 22 | 0.1077 | 8.550  | 5.187  | 5.973  | 22.516 | 15.177 |
| 22 | 0.1087 | 8.042  | 10.140 | 11.728 | 17.417 | 26.653 |
| 22 | 0.1097 | 5.537  | 7.517  | 7.695  | 11.588 | 16.725 |
| 22 | 0.1107 | 6.476  | 6.225  | 6.832  | 10.061 | 4.592  |
| 22 | 0.1117 | 6.485  | 4.399  | 4.958  | 11.732 | 6.325  |
| 22 | 0.1127 | 8.599  | 5.228  | 6.936  | 3.765  | 17.133 |
| 22 | 0.1137 | 11.151 | 9.379  | 10.764 | 8.927  | 16.827 |
| 22 | 0.1147 | 8.667  | 5.738  | 10.001 | 6.289  | 5.650  |
| 22 | 0.1157 | 9.624  | 8.094  | 12.913 | 12.467 | 21.328 |
| 22 | 0.1167 | 11.020 | 8.366  | 12.497 | 10.722 | 13.772 |
| 22 | 0.1177 | 5.036  | 4.102  | 6.073  | 5.997  | 8.341  |
| 22 | 0.1187 | 11.180 | 7.545  | 6.888  | 16.508 | 11.038 |
| 22 | 0.1197 | 13.821 | 14.240 | 12.462 | 20.498 | 20.086 |
| 22 | 0.1207 | 12.770 | 12.897 | 10.538 | 24.356 | 12.942 |
| 22 | 0.1217 | 11.666 | 7.993  | 11.684 | 18.765 | 11.950 |
| 22 | 0.1227 | 8.868  | 8.446  | 4.780  | 22.385 | 6.800  |
| 22 | 0.1237 | 5.163  | 11.904 | 4.995  | 31.983 | 13.625 |
| 22 | 0.1247 | 9.857  | 10.600 | 9.981  | 27.632 | 9.082  |
| 22 | 0.1257 | 14.746 | 13.186 | 15.322 | 23.591 | 14.170 |
| 22 | 0.1267 | 12.824 | 12.632 | 10.983 | 25.690 | 10.051 |
| 22 | 0.1277 | 15.310 | 17.560 | 12.609 | 30.128 | 8.365  |
| 22 | 0.1287 | 13.974 | 6.040  | 6.790  | 23.359 | 12.391 |
| 22 | 0.1297 | 15.794 | 10.582 | 15.999 | 11.894 | 23.293 |
| 22 | 0.1307 | 12.549 | 12.964 | 10.427 | 16.352 | 25.855 |
| 22 | 0.1317 | 8.111  | 9.830  | 13.674 | 7.079  | 4.377  |
| 22 | 0.1327 | 15.491 | 10.829 | 16.610 | 18.971 | 3.105  |
| 22 | 0.1337 | 12.401 | 12.059 | 8.580  | 24.341 | 21.466 |
| 22 | 0.1347 | 18.827 | 12.958 | 14.681 | 15.823 | 18.680 |
| 22 | 0.1357 | 17.526 | 12.224 | 18.792 | 11.049 | 14.776 |
| 22 | 0.1367 | 13.619 | 7.918  | 7.057  | 22.639 | 13.902 |
| 22 | 0.1377 | 22.537 | 28.256 | 19.553 | 39.823 | 20.463 |
| 22 | 0.1387 | 14.200 | 18.270 | 14.472 | 32.178 | 18.904 |
| 22 | 0.1397 | 13.324 | 15.293 | 13.653 | 22.988 | 12.015 |
| 22 | 0.1407 | 7.459  | 6.799  | 5.091  | 19.484 | 3.329  |
| 22 | 0.1417 | 9.157  | 12.362 | 11.421 | 16.492 | 8.743  |
| 22 | 0.1427 | 12.893 | 10.906 | 10.917 | 23.715 | 24.761 |
| 22 | 0.1437 | 12.767 | 11.006 | 10.883 | 23.882 | 24.642 |

|    |        |        |        |        |        |        |
|----|--------|--------|--------|--------|--------|--------|
| 22 | 0.1447 | 12.645 | 11.120 | 10.860 | 24.046 | 24.520 |
| 22 | 0.1457 | 17.257 | 18.683 | 13.660 | 31.288 | 22.143 |
| 22 | 0.1467 | 12.759 | 13.946 | 10.454 | 23.909 | 11.167 |
| 22 | 0.1477 | 9.332  | 9.750  | 8.801  | 21.833 | 20.004 |
| 22 | 0.1487 | 9.048  | 5.787  | 5.472  | 10.087 | 23.620 |
| 22 | 0.1497 | 18.729 | 8.278  | 10.131 | 16.979 | 16.825 |
| 22 | 0.1507 | 11.674 | 5.365  | 5.753  | 17.501 | 12.911 |
| 22 | 0.1517 | 8.912  | 6.123  | 9.087  | 7.191  | 8.874  |
| 22 | 0.1527 | 13.498 | 18.085 | 12.983 | 18.777 | 5.455  |
| 22 | 0.1537 | 11.110 | 8.134  | 9.732  | 15.364 | 19.726 |
| 22 | 0.1547 | 14.518 | 13.409 | 16.476 | 15.628 | 18.328 |
| 22 | 0.1557 | 18.029 | 15.456 | 16.427 | 23.965 | 8.436  |
| 22 | 0.1567 | 11.669 | 12.073 | 14.847 | 17.849 | 9.702  |
| 22 | 0.1577 | 15.385 | 12.319 | 14.161 | 17.743 | 14.387 |
| 22 | 0.1587 | 11.010 | 6.601  | 9.635  | 24.192 | 19.393 |
| 22 | 0.1597 | 7.359  | 6.032  | 5.531  | 21.954 | 8.632  |
| 22 | 0.1607 | 11.522 | 12.788 | 7.270  | 19.319 | 12.310 |
| 22 | 0.1617 | 11.905 | 5.324  | 4.835  | 13.725 | 12.720 |
| 22 | 0.1627 | 17.310 | 13.579 | 14.097 | 14.492 | 14.205 |
| 22 | 0.1637 | 23.831 | 16.720 | 18.608 | 16.949 | 14.565 |
| 22 | 0.1647 | 24.410 | 16.868 | 18.876 | 16.651 | 15.729 |
| 22 | 0.1657 | 15.814 | 14.528 | 15.573 | 16.011 | 15.740 |
| 22 | 0.1667 | 4.727  | 8.685  | 8.156  | 9.139  | 2.700  |
| 22 | 0.1677 | 15.883 | 5.724  | 11.681 | 22.224 | 11.657 |
| 22 | 0.1687 | 14.313 | 6.151  | 8.739  | 17.769 | 10.753 |
| 22 | 0.1697 | 10.458 | 10.196 | 8.534  | 19.957 | 15.015 |
| 22 | 0.1707 | 10.469 | 10.232 | 8.566  | 19.871 | 14.956 |
| 22 | 0.1717 | 12.886 | 10.996 | 9.732  | 20.383 | 12.547 |
| 22 | 0.1727 | 10.089 | 8.425  | 7.458  | 18.758 | 14.746 |
| 22 | 0.1737 | 9.645  | 5.333  | 6.838  | 19.937 | 13.177 |
| 22 | 0.1747 | 15.620 | 14.005 | 14.801 | 13.866 | 15.299 |
| 22 | 0.1757 | 9.892  | 4.752  | 9.445  | 17.571 | 16.907 |
| 22 | 0.1767 | 20.043 | 5.489  | 16.578 | 12.515 | 18.696 |
| 22 | 0.1777 | 7.303  | 7.960  | 6.911  | 12.288 | 3.132  |
| 22 | 0.1787 | 3.033  | 4.481  | 1.775  | 10.842 | 5.538  |
| 22 | 0.1797 | 9.899  | 8.570  | 8.998  | 26.901 | 17.331 |
| 22 | 0.1807 | 12.110 | 9.788  | 10.105 | 21.825 | 19.678 |
| 22 | 0.1817 | 15.336 | 7.672  | 12.475 | 23.303 | 14.435 |
| 22 | 0.1827 | 19.441 | 11.214 | 16.556 | 18.437 | 12.569 |
| 22 | 0.1837 | 12.599 | 8.778  | 11.592 | 20.562 | 21.674 |
| 22 | 0.1847 | 13.954 | 7.207  | 13.620 | 18.253 | 10.505 |
| 22 | 0.1857 | 5.738  | 8.091  | 4.867  | 20.354 | 11.068 |
| 22 | 0.1867 | 16.448 | 8.437  | 12.123 | 12.795 | 12.780 |
| 22 | 0.1877 | 4.871  | 5.338  | 3.116  | 10.292 | 9.962  |
| 22 | 0.1887 | 16.688 | 14.151 | 16.928 | 14.069 | 10.238 |
| 22 | 0.1897 | 10.069 | 13.856 | 10.638 | 19.950 | 11.579 |
| 22 | 0.1907 | 8.543  | 9.851  | 8.252  | 11.571 | 8.603  |
| 22 | 0.1917 | 10.714 | 13.232 | 9.901  | 17.211 | 19.882 |
| 22 | 0.1927 | 18.625 | 19.348 | 15.702 | 23.951 | 7.460  |
| 22 | 0.1937 | 9.403  | 12.931 | 10.024 | 19.820 | 13.439 |

|    |        |        |        |        |        |        |
|----|--------|--------|--------|--------|--------|--------|
| 22 | 0.1947 | 10.692 | 11.718 | 9.653  | 18.539 | 13.312 |
| 22 | 0.1957 | 18.239 | 15.232 | 19.390 | 14.303 | 23.642 |
| 22 | 0.1967 | 18.706 | 16.956 | 21.649 | 12.302 | 24.317 |
| 22 | 0.1977 | 16.660 | 14.202 | 14.900 | 14.081 | 12.401 |
| 22 | 0.1987 | 17.364 | 17.245 | 20.281 | 15.406 | 13.431 |
| 22 | 0.1997 | 15.456 | 10.576 | 13.279 | 12.174 | 7.014  |
| 22 | 0.2007 | 13.160 | 11.647 | 13.560 | 14.319 | 15.160 |
| 22 | 0.2017 | 22.078 | 17.540 | 20.269 | 14.797 | 8.315  |
| 22 | 0.2027 | 12.726 | 15.705 | 14.869 | 18.195 | 11.240 |
| 22 | 0.2037 | 12.429 | 8.863  | 12.645 | 10.540 | 6.504  |
| 22 | 0.2047 | 6.061  | 7.470  | 5.352  | 12.101 | 9.428  |
| 22 | 0.2057 | 4.307  | 8.570  | 5.587  | 16.239 | 9.279  |
| 22 | 0.2067 | 15.163 | 12.454 | 12.341 | 15.186 | 5.788  |
| 22 | 0.2077 | 14.690 | 17.747 | 21.163 | 13.292 | 8.578  |
| 22 | 0.2087 | 24.319 | 21.432 | 24.352 | 17.473 | 9.759  |
| 22 | 0.2097 | 2.176  | 2.829  | 4.679  | 8.477  | 6.686  |
| 22 | 0.2107 | 7.319  | 9.781  | 6.917  | 11.581 | 3.334  |
| 22 | 0.2117 | 9.544  | 18.251 | 15.630 | 20.866 | 9.118  |
| 22 | 0.2127 | 27.563 | 25.587 | 25.097 | 10.544 | 11.554 |
| 22 | 0.2137 | 9.114  | 12.470 | 9.520  | 19.675 | 21.479 |
| 22 | 0.2147 | 13.561 | 22.073 | 19.592 | 21.528 | 19.080 |
| 22 | 0.2157 | 13.879 | 13.528 | 16.768 | 12.931 | 9.595  |
| 22 | 0.2167 | 14.543 | 8.333  | 12.385 | 7.313  | 7.591  |
| 22 | 0.2177 | 10.390 | 6.766  | 9.657  | 10.271 | 5.353  |
| 22 | 0.2187 | 6.396  | 8.820  | 11.971 | 8.728  | 5.294  |
| 22 | 0.2197 | 5.746  | 7.950  | 11.784 | 9.577  | 3.086  |
| 22 | 0.2207 | 6.018  | 7.402  | 12.304 | 8.421  | 9.719  |
| 22 | 0.2217 | 10.132 | 16.450 | 15.206 | 13.708 | 7.651  |
| 22 | 0.2227 | 8.924  | 16.065 | 15.314 | 20.898 | 9.550  |
| 22 | 0.2237 | 8.929  | 16.075 | 15.347 | 20.884 | 9.551  |
| 22 | 0.2247 | 14.410 | 13.789 | 21.747 | 14.379 | 9.695  |
| 22 | 0.2257 | 9.295  | 6.596  | 11.626 | 5.255  | 8.369  |
| 22 | 0.2267 | 5.835  | 5.505  | 7.025  | 7.375  | 8.093  |
| 22 | 0.2277 | 11.650 | 13.537 | 14.840 | 7.256  | 10.472 |
| 22 | 0.2287 | 16.323 | 19.740 | 18.339 | 17.594 | 14.258 |
| 22 | 0.2297 | 13.727 | 19.884 | 21.888 | 5.896  | 9.347  |
| 22 | 0.2307 | 15.469 | 14.519 | 14.125 | 3.081  | 6.775  |
| 22 | 0.2317 | 12.903 | 10.702 | 7.749  | 17.018 | 6.809  |
| 22 | 0.2327 | 12.851 | 12.573 | 13.075 | 14.522 | 11.984 |
| 22 | 0.2337 | 16.426 | 24.773 | 12.726 | 22.512 | 15.441 |
| 22 | 0.2347 | 13.375 | 8.795  | 11.131 | 9.338  | 6.621  |
| 22 | 0.2357 | 15.658 | 17.055 | 13.936 | 8.333  | 6.848  |
| 22 | 0.2367 | 9.780  | 14.187 | 14.163 | 8.922  | 5.514  |
| 22 | 0.2377 | 11.967 | 15.106 | 10.081 | 9.516  | 8.240  |
| 22 | 0.2387 | 11.969 | 15.109 | 10.075 | 9.515  | 8.249  |
| 22 | 0.2397 | 5.587  | 5.887  | 5.659  | 8.481  | 11.537 |
| 22 | 0.2407 | 6.607  | 16.437 | 15.130 | 9.104  | 11.033 |
| 22 | 0.2417 | 6.319  | 13.952 | 12.000 | 24.703 | 17.297 |
| 22 | 0.2427 | 6.180  | 9.502  | 12.608 | 21.420 | 19.196 |
| 22 | 0.2437 | 6.207  | 9.580  | 12.662 | 21.452 | 19.267 |

|    |        |        |        |        |        |        |
|----|--------|--------|--------|--------|--------|--------|
| 22 | 0.2447 | 8.209  | 8.607  | 14.451 | 25.377 | 18.389 |
| 22 | 0.2457 | 10.737 | 11.869 | 18.824 | 15.739 | 12.877 |
| 22 | 0.2467 | 10.799 | 11.908 | 18.836 | 15.852 | 12.942 |
| 22 | 0.2477 | 7.131  | 9.637  | 14.625 | 16.648 | 12.417 |
| 22 | 0.2487 | 5.068  | 7.277  | 3.898  | 16.918 | 5.308  |
| 22 | 0.2497 | 7.862  | 12.991 | 10.592 | 15.365 | 7.593  |
| 22 | 0.2507 | 7.885  | 13.063 | 10.607 | 15.409 | 7.614  |
| 22 | 0.2517 | 6.802  | 13.231 | 8.068  | 13.228 | 18.343 |
| 22 | 0.2527 | 9.419  | 12.012 | 15.987 | 13.065 | 12.253 |
| 22 | 0.2537 | 8.124  | 10.879 | 12.368 | 17.403 | 13.242 |
| 22 | 0.2547 | 10.147 | 11.981 | 13.484 | 19.413 | 16.558 |
| 22 | 0.2557 | 16.580 | 12.093 | 18.642 | 13.348 | 7.495  |
| 22 | 0.2567 | 11.895 | 14.978 | 19.189 | 16.988 | 17.232 |
| 22 | 0.2577 | 20.539 | 21.089 | 23.882 | 22.648 | 16.853 |
| 22 | 0.2587 | 18.245 | 16.050 | 20.757 | 15.641 | 14.117 |
| 22 | 0.2597 | 17.625 | 26.243 | 20.911 | 16.748 | 11.807 |
| 22 | 0.2607 | 14.399 | 20.266 | 18.342 | 18.388 | 6.630  |
| 22 | 0.2617 | 14.835 | 8.802  | 12.116 | 14.238 | 9.827  |
| 22 | 0.2627 | 16.126 | 17.097 | 19.104 | 18.875 | 12.930 |
| 22 | 0.2637 | 17.043 | 24.033 | 25.376 | 20.854 | 8.712  |
| 22 | 0.2647 | 24.145 | 24.336 | 27.403 | 19.360 | 10.599 |
| 22 | 0.2657 | 18.522 | 26.326 | 23.036 | 15.859 | 10.999 |
| 22 | 0.2667 | 17.899 | 10.440 | 13.911 | 17.860 | 17.935 |
| 22 | 0.2677 | 5.126  | 2.742  | 3.458  | 19.865 | 24.124 |
| 22 | 0.2687 | 9.799  | 16.875 | 13.648 | 18.619 | 15.344 |
| 22 | 0.2697 | 14.887 | 16.039 | 19.690 | 15.592 | 19.230 |
| 22 | 0.2707 | 29.079 | 16.400 | 25.700 | 15.474 | 12.188 |
| 22 | 0.2717 | 13.915 | 16.739 | 14.278 | 14.775 | 8.520  |
| 22 | 0.2727 | 10.512 | 15.573 | 14.303 | 17.258 | 9.941  |
| 22 | 0.2737 | 11.566 | 15.032 | 13.056 | 15.244 | 9.958  |
| 22 | 0.2747 | 23.507 | 15.699 | 24.669 | 14.031 | 11.864 |
| 22 | 0.2757 | 24.919 | 18.751 | 23.075 | 17.969 | 18.345 |
| 22 | 0.2767 | 10.037 | 7.843  | 5.733  | 15.101 | 14.256 |
| 22 | 0.2777 | 29.964 | 18.082 | 24.020 | 27.410 | 16.611 |
| 22 | 0.2787 | 26.642 | 20.458 | 22.851 | 28.851 | 11.590 |
| 22 | 0.2797 | 33.797 | 23.477 | 29.272 | 25.730 | 17.153 |
| 22 | 0.2807 | 27.679 | 25.817 | 27.903 | 18.422 | 11.977 |
| 22 | 0.2817 | 18.476 | 18.117 | 15.503 | 23.490 | 11.907 |
| 22 | 0.2827 | 17.193 | 17.313 | 18.984 | 11.066 | 5.074  |
| 22 | 0.2837 | 7.994  | 16.473 | 14.447 | 13.683 | 7.559  |
| 22 | 0.2847 | 18.398 | 13.636 | 17.618 | 20.299 | 16.728 |
| 22 | 0.2857 | 29.107 | 19.744 | 22.294 | 14.823 | 16.774 |
| 22 | 0.2867 | 5.717  | 12.226 | 8.816  | 16.330 | 6.012  |
| 22 | 0.2877 | 6.123  | 9.488  | 6.510  | 13.757 | 8.462  |
| 22 | 0.2887 | 3.722  | 2.318  | 5.457  | 3.020  | 0.770  |
| 22 | 0.2897 | 7.924  | 5.399  | 5.589  | 5.905  | 2.529  |
| 22 | 0.2907 | 12.577 | 19.043 | 10.407 | 14.596 | 5.849  |
| 22 | 0.2917 | 7.511  | 15.257 | 8.682  | 19.912 | 11.248 |
| 22 | 0.2927 | 10.294 | 12.541 | 9.897  | 14.793 | 22.027 |
| 22 | 0.2937 | 16.851 | 11.307 | 8.547  | 23.217 | 22.214 |

|    |        |        |        |        |        |        |
|----|--------|--------|--------|--------|--------|--------|
| 22 | 0.2947 | 19.478 | 17.647 | 15.003 | 13.475 | 13.585 |
| 22 | 0.2957 | 16.440 | 18.132 | 11.353 | 15.394 | 8.181  |
| 22 | 0.2967 | 11.553 | 21.429 | 12.173 | 17.459 | 4.574  |
| 22 | 0.2977 | 11.867 | 18.651 | 9.224  | 22.355 | 21.013 |
| 22 | 0.2987 | 7.999  | 17.119 | 11.412 | 22.401 | 7.182  |
| 22 | 0.2997 | 9.942  | 3.729  | 4.742  | 17.453 | 6.173  |
| 22 | 0.3007 | 15.009 | 14.601 | 14.666 | 17.063 | 13.182 |
| 22 | 0.3017 | 16.589 | 30.170 | 18.230 | 33.845 | 20.810 |
| 22 | 0.3027 | 17.297 | 24.677 | 15.511 | 24.978 | 19.475 |
| 22 | 0.3037 | 14.377 | 16.521 | 13.764 | 16.671 | 12.073 |
| 22 | 0.3047 | 13.278 | 11.270 | 10.267 | 18.887 | 14.225 |
| 22 | 0.3057 | 9.999  | 10.936 | 8.570  | 14.258 | 12.776 |
| 22 | 0.3067 | 11.898 | 14.639 | 9.342  | 18.694 | 9.754  |
| 22 | 0.3077 | 16.076 | 18.350 | 14.252 | 10.654 | 8.895  |
| 22 | 0.3087 | 12.605 | 8.848  | 11.617 | 11.812 | 12.939 |
| 22 | 0.3097 | 12.762 | 10.285 | 15.266 | 9.635  | 10.386 |
| 22 | 0.3107 | 13.303 | 9.282  | 12.160 | 7.901  | 8.861  |
| 22 | 0.3117 | 21.576 | 11.281 | 18.249 | 15.908 | 14.628 |
| 22 | 0.3127 | 9.763  | 10.363 | 10.618 | 6.018  | 13.413 |
| 22 | 0.3137 | 13.269 | 16.121 | 16.952 | 14.296 | 8.369  |
| 22 | 0.3147 | 8.771  | 7.508  | 7.336  | 9.567  | 7.938  |
| 22 | 0.3157 | 7.873  | 13.791 | 8.920  | 12.107 | 9.594  |
| 22 | 0.3167 | 9.043  | 10.124 | 9.085  | 15.742 | 14.941 |
| 22 | 0.3177 | 14.184 | 23.723 | 13.568 | 22.015 | 16.038 |
| 22 | 0.3187 | 12.566 | 9.921  | 13.788 | 15.187 | 16.339 |
| 22 | 0.3197 | 5.330  | 8.577  | 10.888 | 11.776 | 6.409  |
| 22 | 0.3207 | 10.475 | 8.685  | 8.341  | 11.465 | 10.683 |
| 22 | 0.3217 | 11.668 | 11.222 | 13.777 | 9.646  | 6.621  |
| 22 | 0.3227 | 12.984 | 5.383  | 8.935  | 6.273  | 18.233 |
| 22 | 0.3237 | 11.959 | 17.287 | 13.229 | 16.159 | 22.118 |
| 22 | 0.3247 | 9.606  | 17.792 | 15.362 | 18.724 | 25.591 |
| 22 | 0.3257 | 7.742  | 14.084 | 9.434  | 18.597 | 24.678 |
| 22 | 0.3267 | 12.703 | 13.055 | 17.006 | 15.384 | 11.034 |
| 22 | 0.3277 | 23.647 | 19.904 | 21.865 | 17.577 | 19.824 |
| 22 | 0.3287 | 6.696  | 11.362 | 10.598 | 16.987 | 14.969 |
| 22 | 0.3297 | 15.240 | 19.384 | 15.476 | 21.136 | 14.065 |
| 22 | 0.3307 | 11.666 | 11.012 | 11.137 | 13.319 | 12.164 |
| 22 | 0.3317 | 7.685  | 7.536  | 6.046  | 18.427 | 13.159 |
| 22 | 0.3327 | 10.339 | 13.628 | 8.780  | 16.083 | 15.230 |
| 22 | 0.3337 | 16.734 | 23.710 | 15.311 | 20.233 | 13.264 |
| 22 | 0.3347 | 5.473  | 7.085  | 5.441  | 11.161 | 14.001 |
| 22 | 0.3357 | 3.023  | 5.771  | 3.822  | 12.553 | 8.920  |
| 22 | 0.3367 | 3.930  | 9.852  | 4.922  | 13.336 | 7.833  |
| 22 | 0.3377 | 2.774  | 8.760  | 3.108  | 5.793  | 2.903  |
| 22 | 0.3387 | 4.027  | 8.287  | 4.349  | 4.430  | 3.277  |
| 22 | 0.3397 | 3.642  | 9.459  | 5.199  | 5.072  | 3.739  |
| 22 | 0.3407 | 17.737 | 20.375 | 18.059 | 13.606 | 6.526  |
| 22 | 0.3417 | 8.314  | 17.112 | 10.950 | 16.650 | 12.123 |
| 22 | 0.3427 | 18.952 | 26.510 | 19.911 | 15.260 | 11.472 |
| 22 | 0.3437 | 13.095 | 14.131 | 14.196 | 4.842  | 10.421 |

|    |        |        |        |        |        |        |
|----|--------|--------|--------|--------|--------|--------|
| 22 | 0.3447 | 9.422  | 13.750 | 8.187  | 10.615 | 13.213 |
| 22 | 0.3457 | 9.135  | 11.979 | 9.464  | 9.068  | 3.555  |
| 22 | 0.3467 | 7.172  | 11.519 | 10.264 | 5.500  | 12.887 |
| 22 | 0.3477 | 11.030 | 19.336 | 11.917 | 11.758 | 13.923 |
| 22 | 0.3487 | 15.013 | 17.654 | 15.897 | 9.798  | 11.235 |
| 22 | 0.3497 | 19.242 | 16.489 | 18.839 | 12.571 | 13.824 |
| 22 | 0.3507 | 16.120 | 15.883 | 11.267 | 16.245 | 12.767 |
| 22 | 0.3517 | 15.763 | 26.854 | 16.108 | 21.408 | 20.282 |
| 22 | 0.3527 | 14.681 | 14.483 | 19.143 | 11.917 | 13.238 |
| 22 | 0.3537 | 6.063  | 15.932 | 7.662  | 21.585 | 12.462 |
| 22 | 0.3547 | 7.789  | 8.107  | 7.963  | 7.427  | 18.247 |
| 22 | 0.3557 | 10.941 | 17.203 | 12.125 | 10.363 | 14.742 |
| 22 | 0.3567 | 12.876 | 27.359 | 18.993 | 35.721 | 14.199 |
| 22 | 0.3577 | 12.117 | 20.290 | 13.936 | 15.887 | 13.521 |
| 22 | 0.3587 | 20.601 | 17.516 | 18.727 | 8.696  | 11.420 |
| 22 | 0.3597 | 29.773 | 37.592 | 40.412 | 26.857 | 26.353 |
| 22 | 0.3607 | 23.466 | 26.852 | 25.622 | 12.849 | 25.162 |
| 22 | 0.3617 | 25.409 | 31.976 | 34.765 | 13.209 | 13.964 |
| 22 | 0.3627 | 12.374 | 19.084 | 13.059 | 16.388 | 11.745 |
| 22 | 0.3637 | 7.454  | 14.547 | 7.874  | 12.810 | 5.365  |
| 22 | 0.3647 | 13.976 | 19.342 | 12.309 | 17.601 | 5.994  |
| 22 | 0.3657 | 14.815 | 18.386 | 12.784 | 16.895 | 30.991 |
| 22 | 0.3667 | 10.025 | 12.402 | 17.366 | 15.036 | 17.245 |
| 22 | 0.3677 | 9.121  | 10.854 | 16.824 | 20.232 | 24.838 |
| 22 | 0.3687 | 7.636  | 4.324  | 7.435  | 9.755  | 18.500 |
| 22 | 0.3697 | 9.610  | 4.828  | 8.039  | 9.541  | 8.804  |
| 22 | 0.3707 | 14.739 | 9.417  | 17.767 | 10.089 | 12.482 |
| 22 | 0.3717 | 13.097 | 10.868 | 15.209 | 14.055 | 9.586  |
| 22 | 0.3727 | 12.621 | 12.052 | 15.885 | 12.627 | 10.403 |
| 22 | 0.3737 | 12.390 | 11.817 | 12.631 | 15.337 | 10.484 |
| 22 | 0.3747 | 17.196 | 19.281 | 20.765 | 15.736 | 12.845 |
| 22 | 0.3757 | 15.642 | 13.483 | 19.070 | 10.933 | 11.880 |
| 22 | 0.3767 | 15.386 | 14.405 | 16.997 | 18.822 | 11.401 |
| 22 | 0.3777 | 12.930 | 11.769 | 14.550 | 17.876 | 15.951 |
| 22 | 0.3787 | 12.232 | 14.822 | 17.325 | 9.753  | 24.376 |
| 22 | 0.3797 | 8.258  | 15.872 | 13.381 | 12.396 | 9.059  |
| 22 | 0.3807 | 7.315  | 16.883 | 13.287 | 19.031 | 19.359 |
| 22 | 0.3817 | 5.476  | 17.542 | 19.862 | 19.866 | 19.605 |
| 22 | 0.3827 | 16.908 | 23.656 | 27.305 | 22.655 | 18.743 |
| 22 | 0.3837 | 17.564 | 21.711 | 24.849 | 17.346 | 14.730 |
| 22 | 0.3847 | 11.656 | 15.030 | 15.043 | 20.375 | 21.364 |
| 22 | 0.3857 | 16.403 | 19.109 | 24.944 | 9.772  | 17.044 |
| 22 | 0.3867 | 18.612 | 17.289 | 21.797 | 20.389 | 19.523 |
| 22 | 0.3877 | 16.824 | 21.905 | 22.875 | 15.391 | 22.631 |
| 22 | 0.3887 | 13.365 | 16.049 | 19.433 | 22.416 | 15.170 |
| 22 | 0.3897 | 20.835 | 24.292 | 29.552 | 18.819 | 13.285 |
| 22 | 0.3907 | 11.819 | 15.298 | 13.697 | 14.840 | 15.966 |
| 22 | 0.3917 | 10.263 | 17.445 | 15.939 | 12.288 | 13.811 |
| 22 | 0.3927 | 7.352  | 9.743  | 9.529  | 15.917 | 14.900 |
| 22 | 0.3937 | 19.818 | 23.250 | 25.744 | 17.779 | 13.919 |

|    |        |        |        |        |        |        |
|----|--------|--------|--------|--------|--------|--------|
| 22 | 0.3947 | 11.301 | 12.789 | 19.302 | 21.984 | 11.028 |
| 22 | 0.3957 | 14.552 | 10.891 | 18.376 | 6.966  | 10.859 |
| 22 | 0.3967 | 13.288 | 14.633 | 18.791 | 7.385  | 8.452  |
| 22 | 0.3977 | 12.127 | 15.396 | 16.486 | 5.712  | 9.399  |
| 22 | 0.3987 | 9.294  | 8.902  | 9.731  | 6.661  | 7.374  |
| 22 | 0.3997 | 12.438 | 13.160 | 14.612 | 10.189 | 7.845  |
| 22 | 0.4007 | 13.541 | 16.717 | 17.498 | 12.134 | 12.581 |
| 22 | 0.4017 | 9.471  | 9.648  | 10.756 | 16.449 | 7.252  |
| 22 | 0.4027 | 13.274 | 18.416 | 18.928 | 15.175 | 9.313  |
| 22 | 0.4037 | 13.389 | 9.122  | 11.861 | 14.437 | 16.441 |
| 22 | 0.4047 | 15.340 | 13.818 | 18.404 | 15.667 | 12.510 |
| 22 | 0.4057 | 13.778 | 9.724  | 14.938 | 12.938 | 10.950 |
| 22 | 0.4067 | 13.754 | 14.879 | 16.897 | 9.312  | 13.826 |
| 22 | 0.4077 | 12.011 | 11.576 | 12.036 | 12.418 | 12.463 |
| 22 | 0.4087 | 10.051 | 13.419 | 14.980 | 7.846  | 11.421 |
| 22 | 0.4097 | 8.528  | 13.238 | 14.186 | 15.080 | 13.937 |
| 22 | 0.4107 | 9.009  | 16.546 | 13.569 | 16.014 | 11.408 |
| 22 | 0.4117 | 10.386 | 9.707  | 10.949 | 14.524 | 11.594 |
| 22 | 0.4127 | 11.302 | 13.382 | 14.020 | 12.435 | 19.647 |
| 22 | 0.4137 | 13.396 | 12.009 | 14.089 | 11.024 | 13.784 |
| 22 | 0.4147 | 10.949 | 12.097 | 13.618 | 12.772 | 10.020 |
| 22 | 0.4157 | 8.985  | 12.178 | 6.723  | 17.383 | 12.053 |
| 22 | 0.4167 | 22.045 | 14.770 | 18.074 | 21.519 | 9.946  |
| 22 | 0.4177 | 7.516  | 10.932 | 7.075  | 20.671 | 15.554 |
| 22 | 0.4187 | 16.577 | 13.577 | 13.710 | 14.175 | 14.427 |
| 22 | 0.4197 | 12.003 | 9.501  | 11.481 | 8.347  | 11.552 |
| 22 | 0.4207 | 17.029 | 20.774 | 12.867 | 9.847  | 15.030 |
| 22 | 0.4217 | 11.022 | 15.076 | 11.178 | 6.544  | 7.997  |
| 22 | 0.4227 | 6.457  | 12.637 | 11.270 | 5.209  | 3.636  |
| 22 | 0.4237 | 9.316  | 8.832  | 9.912  | 11.978 | 9.371  |
| 22 | 0.4247 | 11.558 | 7.024  | 9.847  | 9.982  | 8.799  |
| 22 | 0.4257 | 25.029 | 13.539 | 22.439 | 19.491 | 13.523 |
| 22 | 0.4267 | 8.259  | 8.935  | 9.577  | 8.363  | 7.446  |
| 22 | 0.4277 | 6.362  | 6.171  | 6.294  | 13.429 | 11.438 |
| 22 | 0.4287 | 8.391  | 11.872 | 9.697  | 26.147 | 15.690 |
| 22 | 0.4297 | 13.451 | 12.616 | 15.144 | 17.912 | 17.075 |
| 22 | 0.4307 | 10.340 | 22.243 | 12.185 | 28.449 | 15.067 |
| 22 | 0.4317 | 10.643 | 22.578 | 12.934 | 29.576 | 17.305 |
| 22 | 0.4327 | 16.111 | 24.558 | 27.385 | 21.872 | 17.291 |
| 22 | 0.4337 | 14.341 | 6.530  | 16.055 | 10.386 | 10.697 |
| 22 | 0.4347 | 14.989 | 6.716  | 16.458 | 10.401 | 10.436 |
| 22 | 0.4357 | 16.488 | 12.023 | 15.996 | 11.849 | 11.518 |
| 22 | 0.4367 | 9.075  | 10.279 | 8.221  | 13.201 | 10.579 |
| 22 | 0.4377 | 7.510  | 14.043 | 11.357 | 22.304 | 14.335 |
| 22 | 0.4387 | 13.117 | 15.447 | 11.878 | 23.028 | 22.455 |
| 22 | 0.4397 | 13.290 | 15.489 | 11.885 | 22.935 | 22.370 |
| 22 | 0.4407 | 5.195  | 8.443  | 5.315  | 5.055  | 13.347 |
| 22 | 0.4417 | 7.418  | 10.662 | 8.683  | 11.990 | 21.726 |
| 22 | 0.4427 | 9.606  | 8.685  | 9.642  | 9.960  | 21.014 |
| 22 | 0.4437 | 13.654 | 15.293 | 16.301 | 23.158 | 28.159 |



|    |        |        |        |        |        |        |
|----|--------|--------|--------|--------|--------|--------|
| 22 | 0.4447 | 6.910  | 7.272  | 9.073  | 15.271 | 18.572 |
| 22 | 0.4457 | 5.417  | 11.764 | 7.628  | 11.997 | 12.019 |
| 22 | 0.4467 | 4.218  | 12.412 | 6.137  | 21.042 | 13.824 |
| 22 | 0.4477 | 25.650 | 19.728 | 27.898 | 22.563 | 21.447 |
| 22 | 0.4487 | 21.373 | 15.718 | 23.205 | 14.707 | 17.793 |
| 22 | 0.4497 | 2.235  | 5.530  | 7.334  | 14.141 | 15.085 |
| 22 | 0.4507 | 1.921  | 4.771  | 6.027  | 8.781  | 12.957 |
| 22 | 0.4517 | 9.427  | 5.229  | 7.404  | 9.126  | 7.411  |
| 22 | 0.4527 | 4.734  | 13.294 | 9.984  | 17.116 | 4.438  |
| 22 | 0.4537 | 9.360  | 11.936 | 12.201 | 9.376  | 7.704  |
| 22 | 0.4547 | 22.467 | 32.394 | 36.324 | 11.831 | 25.975 |
| 22 | 0.4557 | 17.466 | 24.980 | 29.043 | 14.613 | 19.529 |
| 22 | 0.4567 | 10.772 | 19.148 | 19.369 | 15.999 | 22.543 |
| 22 | 0.4577 | 12.232 | 11.879 | 13.125 | 25.619 | 17.985 |
| 22 | 0.4587 | 15.923 | 17.128 | 15.338 | 13.240 | 10.718 |
| 22 | 0.4597 | 15.330 | 14.932 | 17.778 | 19.300 | 21.642 |
| 22 | 0.4607 | 17.691 | 14.598 | 19.824 | 13.794 | 8.567  |
| 22 | 0.4617 | 19.369 | 18.772 | 20.092 | 18.205 | 16.433 |
| 22 | 0.4627 | 18.567 | 18.908 | 23.856 | 15.164 | 22.883 |
| 22 | 0.4637 | 13.049 | 24.575 | 27.028 | 14.440 | 17.088 |
| 22 | 0.4647 | 12.920 | 24.724 | 27.178 | 14.615 | 17.087 |
| 22 | 0.4657 | 30.313 | 18.549 | 24.791 | 15.879 | 17.629 |
| 22 | 0.4667 | 30.539 | 20.274 | 22.718 | 12.303 | 26.265 |
| 22 | 0.4677 | 25.683 | 18.117 | 18.430 | 12.185 | 20.383 |
| 22 | 0.4687 | 14.346 | 11.471 | 14.668 | 5.887  | 21.058 |
| 22 | 0.4697 | 35.257 | 30.681 | 37.062 | 7.025  | 20.566 |
| 22 | 0.4707 | 20.971 | 25.831 | 20.989 | 23.537 | 16.663 |
| 22 | 0.4717 | 22.775 | 23.663 | 18.022 | 9.114  | 17.067 |
| 22 | 0.4727 | 22.631 | 23.102 | 19.949 | 7.804  | 31.446 |
| 22 | 0.4737 | 21.595 | 19.638 | 19.999 | 23.010 | 12.853 |
| 22 | 0.4747 | 16.261 | 22.821 | 16.579 | 12.927 | 10.789 |
| 22 | 0.4757 | 16.470 | 14.360 | 16.981 | 11.511 | 10.468 |
| 22 | 0.4767 | 9.177  | 9.596  | 10.996 | 14.347 | 9.624  |
| 22 | 0.4777 | 4.100  | 4.876  | 7.549  | 9.593  | 9.754  |
| 22 | 0.4787 | 16.214 | 21.828 | 19.675 | 11.449 | 6.832  |
| 22 | 0.4797 | 20.793 | 18.112 | 25.350 | 14.976 | 10.535 |
| 22 | 0.4807 | 15.434 | 19.114 | 17.924 | 9.261  | 17.440 |
| 22 | 0.4817 | 23.044 | 23.648 | 26.769 | 18.436 | 20.270 |
| 22 | 0.4827 | 23.114 | 23.693 | 26.826 | 18.433 | 20.329 |
| 22 | 0.4837 | 12.459 | 12.512 | 15.813 | 15.311 | 14.155 |
| 22 | 0.4847 | 19.408 | 18.784 | 27.279 | 6.037  | 10.243 |
| 22 | 0.4857 | 10.309 | 13.299 | 19.463 | 2.573  | 9.401  |
| 22 | 0.4867 | 16.023 | 9.089  | 15.445 | 12.053 | 28.267 |
| 22 | 0.4877 | 33.553 | 31.270 | 35.127 | 13.140 | 20.072 |
| 22 | 0.4887 | 32.119 | 30.451 | 31.039 | 5.031  | 17.408 |
| 22 | 0.4897 | 33.581 | 32.470 | 33.496 | 4.194  | 15.160 |
| 22 | 0.4907 | 10.421 | 8.924  | 18.880 | 7.973  | 13.205 |
| 22 | 0.4917 | 16.710 | 9.573  | 18.089 | 6.922  | 7.852  |
| 22 | 0.4927 | 4.009  | 2.589  | 3.138  | 4.515  | 14.994 |
| 22 | 0.4937 | 3.979  | 3.957  | 2.623  | 8.904  | 8.524  |

|    |        |        |        |        |        |        |
|----|--------|--------|--------|--------|--------|--------|
| 22 | 0.4947 | 10.277 | 20.063 | 14.815 | 12.240 | 11.644 |
| 22 | 0.4957 | 26.937 | 29.471 | 26.331 | 17.540 | 16.925 |
| 22 | 0.4967 | 30.577 | 23.648 | 29.788 | 8.603  | 6.037  |
| 22 | 0.4977 | 30.587 | 23.652 | 29.798 | 8.601  | 6.037  |
| 22 | 0.4987 | 27.685 | 19.541 | 30.093 | 11.011 | 30.504 |
| 22 | 0.4997 | 20.278 | 13.406 | 24.384 | 6.850  | 9.975  |
| 22 | 0.5007 | 14.116 | 7.720  | 10.246 | 5.604  | 12.153 |
| 22 | 0.5017 | 16.291 | 15.245 | 15.709 | 10.860 | 19.421 |
| 22 | 0.5027 | 17.507 | 20.393 | 22.756 | 15.361 | 7.363  |
| 22 | 0.5037 | 19.023 | 23.813 | 23.882 | 12.607 | 6.231  |
| 22 | 0.5047 | 12.506 | 12.578 | 11.727 | 12.375 | 11.819 |
| 22 | 0.5057 | 9.332  | 10.950 | 13.749 | 5.008  | 10.460 |
| 22 | 0.5067 | 15.477 | 14.000 | 15.901 | 10.510 | 38.321 |
| 22 | 0.5077 | 15.400 | 13.948 | 15.447 | 9.886  | 21.558 |
| 22 | 0.5087 | 18.203 | 17.613 | 15.959 | 13.448 | 21.204 |
| 22 | 0.5097 | 17.246 | 17.614 | 17.694 | 21.960 | 16.707 |
| 22 | 0.5107 | 14.787 | 24.589 | 16.166 | 16.617 | 16.142 |
| 22 | 0.5117 | 20.101 | 16.188 | 18.280 | 18.064 | 20.450 |
| 22 | 0.5127 | 16.321 | 15.809 | 15.719 | 17.118 | 15.217 |
| 22 | 0.5137 | 16.320 | 15.797 | 15.716 | 17.119 | 15.213 |
| 22 | 0.5147 | 23.997 | 25.996 | 31.117 | 12.812 | 11.394 |
| 22 | 0.5157 | 24.047 | 26.022 | 31.160 | 12.828 | 11.413 |
| 22 | 0.5167 | 8.241  | 14.860 | 18.248 | 11.938 | 9.894  |
| 22 | 0.5177 | 17.049 | 24.233 | 27.260 | 6.989  | 10.717 |
| 22 | 0.5187 | 19.644 | 22.554 | 30.858 | 6.407  | 16.524 |
| 22 | 0.5197 | 14.110 | 15.603 | 19.502 | 15.559 | 10.115 |
| 22 | 0.5207 | 27.485 | 19.500 | 29.449 | 7.532  | 12.047 |
| 22 | 0.5217 | 11.913 | 10.351 | 19.343 | 5.269  | 8.141  |
| 22 | 0.5227 | 10.665 | 6.989  | 15.049 | 5.902  | 6.083  |
| 22 | 0.5237 | 11.503 | 10.131 | 13.239 | 5.109  | 7.046  |
| 22 | 0.5247 | 24.793 | 23.780 | 28.966 | 17.853 | 19.409 |
| 22 | 0.5257 | 34.938 | 28.622 | 35.949 | 25.408 | 21.370 |
| 22 | 0.5267 | 37.511 | 32.501 | 47.294 | 23.612 | 22.907 |
| 22 | 0.5277 | 27.078 | 26.012 | 28.132 | 16.178 | 14.824 |
| 22 | 0.5287 | 36.706 | 24.966 | 33.099 | 29.005 | 14.146 |
| 22 | 0.5297 | 25.609 | 29.767 | 32.401 | 25.299 | 19.596 |
| 22 | 0.5307 | 18.963 | 20.143 | 31.215 | 12.040 | 19.142 |
| 22 | 0.5317 | 28.771 | 30.004 | 29.671 | 14.632 | 8.536  |
| 22 | 0.5327 | 27.086 | 32.689 | 35.419 | 15.331 | 10.412 |
| 22 | 0.5337 | 27.351 | 34.564 | 37.673 | 16.291 | 20.615 |
| 22 | 0.5347 | 10.717 | 17.545 | 15.082 | 11.884 | 19.472 |
| 22 | 0.5357 | 17.703 | 28.225 | 25.727 | 12.753 | 16.857 |
| 22 | 0.5367 | 17.714 | 25.259 | 19.147 | 16.691 | 23.615 |
| 22 | 0.5377 | 30.366 | 36.354 | 44.192 | 16.725 | 18.135 |
| 22 | 0.5387 | 14.391 | 23.876 | 24.443 | 19.747 | 18.541 |
| 22 | 0.5397 | 16.528 | 24.284 | 19.183 | 24.716 | 15.239 |
| 22 | 0.5407 | 9.279  | 14.049 | 11.705 | 20.519 | 11.252 |
| 22 | 0.5417 | 24.309 | 29.117 | 23.317 | 27.002 | 17.852 |
| 22 | 0.5427 | 19.289 | 21.113 | 24.750 | 19.126 | 22.661 |
| 22 | 0.5437 | 27.208 | 24.665 | 28.125 | 11.515 | 19.789 |

|    |        |        |        |        |        |        |
|----|--------|--------|--------|--------|--------|--------|
| 22 | 0.5447 | 16.494 | 18.380 | 17.330 | 16.179 | 15.619 |
| 22 | 0.5457 | 18.193 | 18.219 | 17.505 | 15.321 | 20.068 |
| 22 | 0.5467 | 14.870 | 23.835 | 21.152 | 10.107 | 17.392 |
| 22 | 0.5477 | 11.700 | 13.538 | 13.051 | 14.441 | 21.267 |
| 22 | 0.5487 | 14.312 | 14.542 | 17.759 | 11.553 | 17.350 |
| 22 | 0.5497 | 17.445 | 13.555 | 16.890 | 25.206 | 8.416  |
| 22 | 0.5507 | 22.181 | 22.569 | 25.243 | 4.110  | 8.488  |
| 22 | 0.5517 | 12.638 | 16.531 | 16.964 | 20.858 | 15.147 |
| 22 | 0.5527 | 13.120 | 17.561 | 13.548 | 17.180 | 22.489 |
| 22 | 0.5537 | 13.347 | 18.176 | 13.757 | 16.800 | 23.022 |
| 22 | 0.5547 | 13.524 | 18.689 | 13.926 | 16.261 | 23.370 |
| 22 | 0.5557 | 24.285 | 20.969 | 27.380 | 6.895  | 14.374 |
| 22 | 0.5567 | 28.353 | 19.857 | 26.365 | 7.481  | 17.362 |
| 22 | 0.5577 | 11.045 | 17.224 | 14.536 | 13.611 | 13.520 |
| 22 | 0.5587 | 11.010 | 6.107  | 9.990  | 8.937  | 18.979 |
| 22 | 0.5597 | 25.489 | 13.104 | 17.263 | 9.000  | 26.045 |
| 22 | 0.5607 | 20.986 | 15.526 | 20.107 | 12.536 | 16.876 |
| 22 | 0.5617 | 14.573 | 10.829 | 14.938 | 17.845 | 12.710 |
| 22 | 0.5627 | 10.264 | 8.737  | 11.329 | 16.694 | 23.169 |
| 22 | 0.5637 | 13.737 | 12.763 | 15.738 | 24.160 | 22.481 |
| 22 | 0.5647 | 15.421 | 8.133  | 16.522 | 17.687 | 20.625 |
| 22 | 0.5657 | 12.152 | 9.765  | 15.128 | 20.201 | 7.982  |
| 22 | 0.5667 | 20.035 | 8.991  | 11.376 | 23.492 | 39.235 |
| 22 | 0.5677 | 10.869 | 5.082  | 9.520  | 17.987 | 14.993 |
| 22 | 0.5687 | 6.938  | 7.538  | 9.222  | 13.793 | 15.457 |
| 22 | 0.5697 | 6.257  | 6.817  | 8.538  | 13.696 | 15.347 |
| 22 | 0.5707 | 5.581  | 4.355  | 8.998  | 9.441  | 5.505  |
| 22 | 0.5717 | 15.455 | 11.225 | 20.500 | 10.371 | 14.539 |
| 22 | 0.5727 | 10.972 | 13.100 | 12.565 | 33.256 | 21.547 |
| 22 | 0.5737 | 10.461 | 13.110 | 12.260 | 33.858 | 20.693 |
| 22 | 0.5747 | 8.208  | 12.095 | 9.508  | 22.005 | 17.505 |
| 22 | 0.5757 | 6.211  | 12.432 | 8.312  | 18.160 | 15.438 |
| 22 | 0.5767 | 6.026  | 12.389 | 8.213  | 18.168 | 15.176 |
| 22 | 0.5777 | 3.733  | 2.949  | 2.433  | 6.042  | 8.938  |
| 22 | 0.5787 | 0.000  | 0.000  | 0.000  | 0.000  | 0.000  |
| 23 | 0.0007 | 0.000  | 0.000  | 0.000  | 0.000  | 0.000  |
| 23 | 0.0017 | 6.859  | 8.962  | 5.871  | 13.955 | 22.153 |
| 23 | 0.0027 | 11.096 | 10.222 | 4.248  | 13.150 | 16.968 |
| 23 | 0.0037 | 9.956  | 7.980  | 5.275  | 4.619  | 23.304 |
| 23 | 0.0047 | 9.633  | 11.670 | 5.550  | 8.189  | 15.475 |
| 23 | 0.0057 | 5.366  | 4.487  | 2.475  | 9.343  | 17.735 |
| 23 | 0.0067 | 5.318  | 8.900  | 6.626  | 7.186  | 4.551  |
| 23 | 0.0077 | 2.889  | 6.863  | 4.745  | 4.296  | 6.297  |
| 23 | 0.0087 | 13.747 | 14.969 | 9.345  | 6.580  | 2.618  |
| 23 | 0.0097 | 6.798  | 10.429 | 5.304  | 2.098  | 5.496  |
| 23 | 0.0107 | 9.459  | 13.258 | 5.990  | 8.073  | 11.520 |
| 23 | 0.0117 | 15.606 | 14.189 | 8.147  | 16.222 | 25.531 |
| 23 | 0.0127 | 14.615 | 11.170 | 8.869  | 13.871 | 26.705 |
| 23 | 0.0137 | 10.178 | 8.260  | 5.650  | 11.649 | 10.227 |
| 23 | 0.0147 | 4.687  | 5.056  | 4.216  | 5.021  | 5.614  |

|    |        |        |        |        |        |        |
|----|--------|--------|--------|--------|--------|--------|
| 23 | 0.0157 | 19.888 | 16.662 | 14.100 | 6.190  | 17.099 |
| 23 | 0.0167 | 7.684  | 8.407  | 5.175  | 6.629  | 10.392 |
| 23 | 0.0177 | 8.222  | 9.583  | 10.733 | 11.459 | 7.936  |
| 23 | 0.0187 | 8.213  | 8.835  | 10.043 | 10.329 | 17.304 |
| 23 | 0.0197 | 11.088 | 5.277  | 6.722  | 3.404  | 10.973 |
| 23 | 0.0207 | 10.030 | 8.505  | 8.754  | 18.214 | 11.203 |
| 23 | 0.0217 | 14.071 | 12.477 | 10.419 | 18.606 | 7.797  |
| 23 | 0.0227 | 15.367 | 13.724 | 11.604 | 18.679 | 11.167 |
| 23 | 0.0237 | 4.105  | 5.905  | 3.525  | 15.546 | 5.208  |
| 23 | 0.0247 | 4.255  | 6.019  | 2.911  | 20.828 | 6.301  |
| 23 | 0.0257 | 3.692  | 4.471  | 4.370  | 19.712 | 11.496 |
| 23 | 0.0267 | 11.661 | 10.432 | 8.369  | 13.158 | 24.471 |
| 23 | 0.0277 | 11.952 | 10.541 | 8.054  | 18.940 | 26.497 |
| 23 | 0.0287 | 9.342  | 7.230  | 5.457  | 17.960 | 26.037 |
| 23 | 0.0297 | 7.825  | 9.148  | 2.932  | 18.441 | 11.527 |
| 23 | 0.0307 | 14.066 | 11.510 | 7.610  | 14.763 | 31.064 |
| 23 | 0.0317 | 8.912  | 9.321  | 7.802  | 16.983 | 21.581 |
| 23 | 0.0327 | 10.399 | 9.704  | 2.028  | 16.747 | 9.543  |
| 23 | 0.0337 | 8.347  | 8.540  | 3.103  | 18.555 | 17.930 |
| 23 | 0.0347 | 17.432 | 16.891 | 11.519 | 24.254 | 24.183 |
| 23 | 0.0357 | 13.579 | 13.847 | 6.204  | 20.409 | 23.282 |
| 23 | 0.0367 | 13.501 | 15.045 | 5.677  | 29.060 | 23.170 |
| 23 | 0.0377 | 18.715 | 19.910 | 17.957 | 31.153 | 20.711 |
| 23 | 0.0387 | 25.219 | 23.288 | 18.734 | 24.469 | 18.307 |
| 23 | 0.0397 | 13.231 | 21.346 | 10.825 | 31.798 | 20.026 |
| 23 | 0.0407 | 17.165 | 10.349 | 7.320  | 14.679 | 15.172 |
| 23 | 0.0417 | 14.769 | 19.560 | 10.091 | 20.895 | 12.874 |
| 23 | 0.0427 | 15.484 | 19.229 | 16.246 | 20.283 | 18.589 |
| 23 | 0.0437 | 8.317  | 7.478  | 6.002  | 19.362 | 12.047 |
| 23 | 0.0447 | 15.268 | 12.746 | 13.662 | 22.582 | 16.222 |
| 23 | 0.0457 | 10.323 | 10.633 | 7.327  | 20.691 | 17.245 |
| 23 | 0.0467 | 11.989 | 15.450 | 11.253 | 25.857 | 15.902 |
| 23 | 0.0477 | 21.624 | 13.448 | 14.378 | 25.292 | 17.977 |
| 23 | 0.0487 | 25.507 | 12.756 | 17.005 | 20.783 | 17.358 |
| 23 | 0.0497 | 16.062 | 11.971 | 9.635  | 13.488 | 17.482 |
| 23 | 0.0507 | 23.684 | 16.611 | 16.847 | 11.651 | 18.954 |
| 23 | 0.0517 | 19.071 | 8.942  | 10.738 | 16.992 | 11.811 |
| 23 | 0.0527 | 9.188  | 5.215  | 5.372  | 7.964  | 19.887 |
| 23 | 0.0537 | 10.562 | 10.629 | 6.286  | 14.998 | 23.388 |
| 23 | 0.0547 | 19.504 | 19.999 | 14.772 | 27.365 | 17.732 |
| 23 | 0.0557 | 19.947 | 5.051  | 6.643  | 9.042  | 14.281 |
| 23 | 0.0567 | 10.059 | 8.148  | 4.271  | 10.791 | 19.125 |
| 23 | 0.0577 | 9.763  | 9.214  | 6.889  | 22.632 | 16.328 |
| 23 | 0.0587 | 14.991 | 8.027  | 9.199  | 14.660 | 17.332 |
| 23 | 0.0597 | 9.562  | 3.568  | 2.925  | 16.790 | 14.701 |
| 23 | 0.0607 | 18.872 | 8.374  | 13.735 | 16.755 | 15.546 |
| 23 | 0.0617 | 13.476 | 11.924 | 8.965  | 17.910 | 15.744 |
| 23 | 0.0627 | 17.143 | 13.073 | 14.166 | 12.607 | 21.962 |
| 23 | 0.0637 | 17.647 | 16.078 | 16.097 | 20.453 | 36.153 |
| 23 | 0.0647 | 14.077 | 11.909 | 14.311 | 23.203 | 26.408 |

|    |        |        |        |        |        |        |
|----|--------|--------|--------|--------|--------|--------|
| 23 | 0.0657 | 12.417 | 7.433  | 6.047  | 12.065 | 19.068 |
| 23 | 0.0667 | 19.652 | 8.444  | 13.419 | 19.533 | 15.612 |
| 23 | 0.0677 | 21.176 | 10.397 | 12.422 | 17.157 | 26.463 |
| 23 | 0.0687 | 23.586 | 14.930 | 18.594 | 20.658 | 32.958 |
| 23 | 0.0697 | 22.013 | 22.157 | 19.081 | 17.653 | 17.085 |
| 23 | 0.0707 | 13.316 | 9.433  | 12.306 | 15.237 | 19.393 |
| 23 | 0.0717 | 13.211 | 7.590  | 8.303  | 17.175 | 12.953 |
| 23 | 0.0727 | 14.482 | 7.656  | 8.480  | 18.331 | 11.280 |
| 23 | 0.0737 | 19.274 | 10.597 | 9.496  | 29.184 | 19.154 |
| 23 | 0.0747 | 8.680  | 4.019  | 7.726  | 10.329 | 12.003 |
| 23 | 0.0757 | 18.864 | 7.557  | 8.335  | 9.540  | 28.116 |
| 23 | 0.0767 | 19.417 | 13.785 | 10.262 | 30.053 | 27.046 |
| 23 | 0.0777 | 11.505 | 6.422  | 6.480  | 16.685 | 15.072 |
| 23 | 0.0787 | 20.413 | 6.504  | 7.340  | 17.770 | 30.271 |
| 23 | 0.0797 | 20.367 | 6.406  | 7.311  | 17.787 | 30.172 |
| 23 | 0.0807 | 13.151 | 5.671  | 3.982  | 8.211  | 10.893 |
| 23 | 0.0817 | 19.934 | 4.110  | 8.866  | 9.437  | 17.729 |
| 23 | 0.0827 | 17.727 | 7.422  | 6.306  | 8.927  | 14.167 |
| 23 | 0.0837 | 15.119 | 6.146  | 8.043  | 7.027  | 8.562  |
| 23 | 0.0847 | 10.323 | 5.519  | 3.307  | 5.406  | 16.916 |
| 23 | 0.0857 | 10.846 | 5.901  | 4.286  | 14.112 | 15.476 |
| 23 | 0.0867 | 7.648  | 9.109  | 4.003  | 23.105 | 10.441 |
| 23 | 0.0877 | 8.574  | 4.589  | 4.784  | 10.227 | 8.089  |
| 23 | 0.0887 | 8.355  | 7.215  | 7.243  | 12.440 | 9.572  |
| 23 | 0.0897 | 9.676  | 9.985  | 9.740  | 15.178 | 8.813  |
| 23 | 0.0907 | 10.907 | 9.610  | 8.880  | 11.348 | 13.022 |
| 23 | 0.0917 | 20.582 | 12.788 | 11.352 | 9.502  | 19.878 |
| 23 | 0.0927 | 22.788 | 15.627 | 14.033 | 12.788 | 20.499 |
| 23 | 0.0937 | 19.279 | 12.724 | 11.599 | 11.160 | 26.744 |
| 23 | 0.0947 | 7.772  | 2.842  | 8.259  | 12.439 | 22.315 |
| 23 | 0.0957 | 12.617 | 5.046  | 10.658 | 11.664 | 15.463 |
| 23 | 0.0967 | 9.656  | 5.974  | 9.197  | 3.931  | 13.516 |
| 23 | 0.0977 | 4.353  | 2.769  | 5.211  | 9.878  | 4.643  |
| 23 | 0.0987 | 11.802 | 10.763 | 3.269  | 7.612  | 12.053 |
| 23 | 0.0997 | 23.512 | 19.243 | 13.978 | 15.682 | 10.638 |
| 23 | 0.1007 | 13.167 | 6.276  | 7.330  | 16.446 | 14.513 |
| 23 | 0.1017 | 12.525 | 8.985  | 7.635  | 13.344 | 13.963 |
| 23 | 0.1027 | 19.824 | 13.944 | 10.073 | 15.354 | 16.067 |
| 23 | 0.1037 | 10.259 | 9.635  | 6.378  | 22.966 | 29.303 |
| 23 | 0.1047 | 12.545 | 8.393  | 5.910  | 17.091 | 19.499 |
| 23 | 0.1057 | 12.986 | 11.567 | 8.144  | 20.689 | 24.324 |
| 23 | 0.1067 | 20.976 | 12.574 | 12.419 | 25.502 | 18.789 |
| 23 | 0.1077 | 18.281 | 16.576 | 13.127 | 21.818 | 15.221 |
| 23 | 0.1087 | 9.297  | 7.227  | 7.323  | 5.292  | 10.555 |
| 23 | 0.1097 | 10.749 | 5.811  | 4.782  | 8.219  | 13.136 |
| 23 | 0.1107 | 13.435 | 10.736 | 6.885  | 13.163 | 9.132  |
| 23 | 0.1117 | 7.481  | 10.221 | 7.936  | 17.683 | 16.136 |
| 23 | 0.1127 | 6.324  | 5.892  | 6.664  | 13.119 | 23.910 |
| 23 | 0.1137 | 8.958  | 8.855  | 8.602  | 12.657 | 14.781 |
| 23 | 0.1147 | 2.075  | 0.896  | 0.673  | 4.670  | 5.637  |

|    |        |        |        |        |        |        |
|----|--------|--------|--------|--------|--------|--------|
| 23 | 0.1157 | 5.429  | 4.725  | 2.752  | 4.079  | 10.742 |
| 23 | 0.1167 | 9.684  | 7.762  | 4.705  | 5.385  | 7.634  |
| 23 | 0.1177 | 12.121 | 14.857 | 10.404 | 13.083 | 9.666  |
| 23 | 0.1187 | 4.451  | 2.891  | 6.123  | 8.293  | 3.994  |
| 23 | 0.1197 | 11.750 | 6.151  | 7.510  | 12.467 | 14.302 |
| 23 | 0.1207 | 13.431 | 4.373  | 6.979  | 14.963 | 18.352 |
| 23 | 0.1217 | 12.318 | 6.855  | 7.905  | 7.884  | 17.490 |
| 23 | 0.1227 | 16.505 | 12.862 | 15.817 | 14.943 | 21.134 |
| 23 | 0.1237 | 11.133 | 12.377 | 5.876  | 19.618 | 16.287 |
| 23 | 0.1247 | 5.262  | 14.098 | 6.009  | 12.781 | 13.641 |
| 23 | 0.1257 | 11.418 | 15.180 | 11.367 | 9.849  | 19.445 |
| 23 | 0.1267 | 6.289  | 9.196  | 8.804  | 15.719 | 18.251 |
| 23 | 0.1277 | 13.375 | 9.731  | 11.130 | 13.512 | 19.647 |
| 23 | 0.1287 | 15.470 | 7.522  | 8.898  | 9.528  | 30.533 |
| 23 | 0.1297 | 15.923 | 9.981  | 8.538  | 15.903 | 27.333 |
| 23 | 0.1307 | 16.163 | 16.025 | 12.393 | 24.471 | 20.560 |
| 23 | 0.1317 | 15.604 | 8.055  | 6.158  | 12.977 | 16.697 |
| 23 | 0.1327 | 8.261  | 15.445 | 5.626  | 10.842 | 19.724 |
| 23 | 0.1337 | 21.842 | 21.658 | 17.340 | 14.274 | 30.019 |
| 23 | 0.1347 | 13.163 | 9.536  | 6.949  | 17.723 | 26.842 |
| 23 | 0.1357 | 11.303 | 13.367 | 8.829  | 19.726 | 28.252 |
| 23 | 0.1367 | 9.692  | 11.213 | 6.796  | 17.550 | 18.135 |
| 23 | 0.1377 | 7.960  | 9.630  | 9.206  | 15.426 | 15.104 |
| 23 | 0.1387 | 11.862 | 14.446 | 12.494 | 15.022 | 21.251 |
| 23 | 0.1397 | 12.603 | 9.351  | 9.606  | 5.900  | 20.684 |
| 23 | 0.1407 | 13.781 | 12.072 | 12.274 | 11.783 | 16.062 |
| 23 | 0.1417 | 17.383 | 9.366  | 11.297 | 19.211 | 22.435 |
| 23 | 0.1427 | 17.214 | 11.443 | 10.760 | 17.140 | 17.698 |
| 23 | 0.1437 | 15.157 | 15.925 | 10.862 | 14.599 | 6.928  |
| 23 | 0.1447 | 14.115 | 15.188 | 6.457  | 21.227 | 24.337 |
| 23 | 0.1457 | 13.710 | 14.620 | 8.675  | 20.757 | 16.400 |
| 23 | 0.1467 | 2.893  | 9.107  | 4.114  | 20.606 | 16.159 |
| 23 | 0.1477 | 17.894 | 7.668  | 7.870  | 20.161 | 21.245 |
| 23 | 0.1487 | 8.967  | 10.278 | 6.865  | 19.496 | 21.561 |
| 23 | 0.1497 | 15.653 | 15.334 | 9.945  | 21.127 | 16.660 |
| 23 | 0.1507 | 8.828  | 10.009 | 5.557  | 20.517 | 16.864 |
| 23 | 0.1517 | 4.467  | 8.666  | 4.752  | 21.359 | 25.450 |
| 23 | 0.1527 | 14.106 | 19.305 | 13.084 | 22.798 | 19.395 |
| 23 | 0.1537 | 7.934  | 8.678  | 4.283  | 17.631 | 14.970 |
| 23 | 0.1547 | 13.449 | 13.469 | 8.970  | 16.946 | 20.191 |
| 23 | 0.1557 | 13.383 | 13.450 | 8.939  | 16.934 | 20.295 |
| 23 | 0.1567 | 30.596 | 34.293 | 20.841 | 16.372 | 27.251 |
| 23 | 0.1577 | 10.595 | 18.310 | 10.541 | 18.611 | 23.486 |
| 23 | 0.1587 | 18.815 | 22.709 | 11.316 | 23.110 | 21.087 |
| 23 | 0.1597 | 8.442  | 14.187 | 7.980  | 18.435 | 17.316 |
| 23 | 0.1607 | 11.358 | 15.642 | 9.630  | 31.233 | 19.293 |
| 23 | 0.1617 | 13.229 | 11.275 | 8.400  | 17.699 | 12.350 |
| 23 | 0.1627 | 12.246 | 25.665 | 16.277 | 22.445 | 17.128 |
| 23 | 0.1637 | 8.986  | 16.445 | 15.212 | 25.532 | 32.601 |
| 23 | 0.1647 | 6.258  | 7.119  | 6.572  | 20.792 | 23.843 |

|    |        |        |        |        |        |        |
|----|--------|--------|--------|--------|--------|--------|
| 23 | 0.1657 | 8.025  | 7.543  | 6.364  | 22.918 | 33.924 |
| 23 | 0.1667 | 4.609  | 1.892  | 2.401  | 10.419 | 17.590 |
| 23 | 0.1677 | 2.950  | 7.730  | 4.625  | 7.971  | 5.234  |
| 23 | 0.1687 | 5.689  | 6.715  | 4.066  | 8.905  | 10.591 |
| 23 | 0.1697 | 4.734  | 7.101  | 2.906  | 13.978 | 7.182  |
| 23 | 0.1707 | 5.850  | 9.843  | 7.261  | 15.401 | 3.367  |
| 23 | 0.1717 | 9.093  | 12.944 | 11.412 | 9.344  | 15.368 |
| 23 | 0.1727 | 8.464  | 16.638 | 16.317 | 25.197 | 22.858 |
| 23 | 0.1737 | 3.817  | 8.506  | 10.719 | 9.245  | 12.557 |
| 23 | 0.1747 | 7.707  | 13.169 | 10.353 | 14.293 | 18.950 |
| 23 | 0.1757 | 9.367  | 7.645  | 7.634  | 11.291 | 20.024 |
| 23 | 0.1767 | 16.769 | 22.016 | 19.537 | 21.313 | 24.435 |
| 23 | 0.1777 | 23.531 | 24.406 | 19.546 | 15.991 | 20.018 |
| 23 | 0.1787 | 11.129 | 15.215 | 17.343 | 12.842 | 10.744 |
| 23 | 0.1797 | 15.477 | 16.956 | 19.360 | 17.005 | 14.659 |
| 23 | 0.1807 | 11.350 | 11.683 | 10.636 | 15.191 | 24.430 |
| 23 | 0.1817 | 11.958 | 13.530 | 10.697 | 6.306  | 11.254 |
| 23 | 0.1827 | 10.628 | 11.255 | 9.572  | 9.734  | 12.293 |
| 23 | 0.1837 | 17.891 | 21.042 | 14.342 | 18.397 | 19.633 |
| 23 | 0.1847 | 15.012 | 16.915 | 10.967 | 14.376 | 19.182 |
| 23 | 0.1857 | 15.774 | 14.119 | 10.701 | 9.249  | 20.087 |
| 23 | 0.1867 | 12.979 | 8.141  | 10.594 | 7.801  | 12.614 |
| 23 | 0.1877 | 4.230  | 5.600  | 5.355  | 5.629  | 5.924  |
| 23 | 0.1887 | 8.597  | 9.772  | 12.975 | 9.308  | 10.753 |
| 23 | 0.1897 | 23.308 | 31.542 | 27.289 | 23.591 | 16.035 |
| 23 | 0.1907 | 17.265 | 13.163 | 12.632 | 25.167 | 9.427  |
| 23 | 0.1917 | 14.406 | 16.419 | 17.847 | 26.689 | 15.990 |
| 23 | 0.1927 | 11.201 | 22.366 | 16.186 | 28.514 | 16.368 |
| 23 | 0.1937 | 13.752 | 16.651 | 19.371 | 20.422 | 9.914  |
| 23 | 0.1947 | 11.363 | 11.818 | 10.687 | 15.933 | 16.781 |
| 23 | 0.1957 | 20.724 | 13.984 | 12.688 | 16.137 | 25.120 |
| 23 | 0.1967 | 13.154 | 13.639 | 9.615  | 17.434 | 22.608 |
| 23 | 0.1977 | 11.488 | 15.755 | 9.744  | 22.239 | 21.366 |
| 23 | 0.1987 | 10.812 | 6.719  | 7.383  | 12.830 | 20.568 |
| 23 | 0.1997 | 9.182  | 14.362 | 9.105  | 11.483 | 18.540 |
| 23 | 0.2007 | 24.507 | 31.217 | 29.867 | 13.476 | 13.896 |
| 23 | 0.2017 | 22.114 | 23.948 | 24.029 | 21.391 | 13.406 |
| 23 | 0.2027 | 19.320 | 17.622 | 21.514 | 14.685 | 8.437  |
| 23 | 0.2037 | 9.727  | 14.268 | 10.106 | 11.307 | 18.549 |
| 23 | 0.2047 | 13.082 | 16.000 | 10.847 | 20.449 | 13.400 |
| 23 | 0.2057 | 8.781  | 10.982 | 8.186  | 18.044 | 15.575 |
| 23 | 0.2067 | 1.376  | 4.627  | 3.300  | 9.977  | 8.828  |
| 23 | 0.2077 | 1.380  | 4.665  | 3.301  | 10.062 | 8.785  |
| 23 | 0.2087 | 4.882  | 8.027  | 7.619  | 10.861 | 11.103 |
| 23 | 0.2097 | 6.258  | 6.013  | 5.136  | 6.478  | 6.976  |
| 23 | 0.2107 | 8.649  | 11.568 | 7.069  | 11.955 | 13.298 |
| 23 | 0.2117 | 12.621 | 9.978  | 11.250 | 24.148 | 14.433 |
| 23 | 0.2127 | 16.539 | 16.470 | 17.061 | 20.834 | 12.252 |
| 23 | 0.2137 | 7.223  | 12.705 | 8.243  | 14.849 | 7.404  |
| 23 | 0.2147 | 6.657  | 7.007  | 8.812  | 25.300 | 6.770  |

|    |        |        |        |        |        |        |
|----|--------|--------|--------|--------|--------|--------|
| 23 | 0.2157 | 12.473 | 19.474 | 14.307 | 27.975 | 10.231 |
| 23 | 0.2167 | 24.977 | 33.972 | 32.872 | 18.665 | 12.005 |
| 23 | 0.2177 | 24.699 | 22.611 | 20.819 | 18.602 | 9.795  |
| 23 | 0.2187 | 16.001 | 14.770 | 17.190 | 19.274 | 16.233 |
| 23 | 0.2197 | 9.757  | 11.840 | 10.163 | 3.114  | 12.133 |
| 23 | 0.2207 | 10.932 | 8.063  | 2.913  | 6.336  | 7.366  |
| 23 | 0.2217 | 18.410 | 15.870 | 10.858 | 10.101 | 13.822 |
| 23 | 0.2227 | 18.014 | 19.163 | 15.037 | 14.451 | 15.025 |
| 23 | 0.2237 | 12.176 | 20.963 | 14.222 | 15.597 | 12.555 |
| 23 | 0.2247 | 14.590 | 14.488 | 9.645  | 18.428 | 23.125 |
| 23 | 0.2257 | 14.831 | 16.299 | 10.338 | 9.826  | 24.596 |
| 23 | 0.2267 | 7.965  | 14.875 | 10.017 | 23.139 | 8.957  |
| 23 | 0.2277 | 13.015 | 18.450 | 16.045 | 20.249 | 18.331 |
| 23 | 0.2287 | 10.282 | 12.457 | 8.618  | 9.414  | 21.394 |
| 23 | 0.2297 | 15.843 | 14.057 | 15.030 | 27.387 | 17.420 |
| 23 | 0.2307 | 11.955 | 19.376 | 15.948 | 26.547 | 22.794 |
| 23 | 0.2317 | 10.094 | 12.084 | 7.237  | 13.099 | 17.965 |
| 23 | 0.2327 | 13.588 | 11.647 | 7.160  | 12.060 | 4.908  |
| 23 | 0.2337 | 5.868  | 10.339 | 6.093  | 16.842 | 10.774 |
| 23 | 0.2347 | 8.369  | 8.045  | 5.885  | 8.567  | 12.990 |
| 23 | 0.2357 | 15.858 | 22.716 | 13.360 | 15.799 | 18.245 |
| 23 | 0.2367 | 11.263 | 17.000 | 12.564 | 12.805 | 15.591 |
| 23 | 0.2377 | 10.771 | 12.365 | 12.763 | 8.772  | 19.554 |
| 23 | 0.2387 | 8.528  | 8.353  | 8.602  | 3.840  | 10.411 |
| 23 | 0.2397 | 16.962 | 19.260 | 15.748 | 19.377 | 12.962 |
| 23 | 0.2407 | 15.200 | 16.559 | 14.737 | 17.159 | 29.336 |
| 23 | 0.2417 | 5.538  | 13.381 | 11.482 | 15.728 | 19.742 |
| 23 | 0.2427 | 11.226 | 13.697 | 9.885  | 16.282 | 9.089  |
| 23 | 0.2437 | 25.296 | 23.732 | 19.841 | 11.149 | 21.081 |
| 23 | 0.2447 | 11.012 | 11.231 | 8.383  | 9.347  | 9.664  |
| 23 | 0.2457 | 6.642  | 12.258 | 9.274  | 13.426 | 14.958 |
| 23 | 0.2467 | 11.088 | 17.190 | 11.007 | 18.934 | 13.647 |
| 23 | 0.2477 | 9.347  | 17.399 | 9.554  | 28.646 | 13.818 |
| 23 | 0.2487 | 9.793  | 11.285 | 5.869  | 14.988 | 14.578 |
| 23 | 0.2497 | 11.977 | 19.327 | 10.447 | 22.353 | 21.710 |
| 23 | 0.2507 | 11.965 | 19.365 | 10.466 | 22.311 | 21.676 |
| 23 | 0.2517 | 11.953 | 19.405 | 10.484 | 22.271 | 21.643 |
| 23 | 0.2527 | 7.470  | 6.523  | 5.633  | 6.824  | 9.391  |
| 23 | 0.2537 | 4.937  | 8.005  | 7.543  | 10.137 | 4.499  |
| 23 | 0.2547 | 4.910  | 8.090  | 7.550  | 10.170 | 4.543  |
| 23 | 0.2557 | 10.405 | 8.981  | 6.711  | 15.948 | 16.638 |
| 23 | 0.2567 | 10.597 | 14.017 | 9.425  | 14.859 | 12.316 |
| 23 | 0.2577 | 21.633 | 23.210 | 11.960 | 20.798 | 19.215 |
| 23 | 0.2587 | 22.205 | 16.952 | 12.613 | 17.433 | 12.034 |
| 23 | 0.2597 | 22.059 | 16.373 | 14.138 | 21.792 | 13.827 |
| 23 | 0.2607 | 14.497 | 9.661  | 13.253 | 19.423 | 15.751 |
| 23 | 0.2617 | 13.453 | 7.982  | 10.973 | 21.302 | 17.038 |
| 23 | 0.2627 | 8.202  | 9.056  | 10.035 | 14.616 | 13.492 |
| 23 | 0.2637 | 7.636  | 11.726 | 7.997  | 21.059 | 11.846 |
| 23 | 0.2647 | 8.066  | 9.434  | 6.125  | 14.807 | 12.375 |



|    |        |        |        |        |        |        |
|----|--------|--------|--------|--------|--------|--------|
| 23 | 0.2657 | 11.848 | 12.042 | 8.897  | 10.137 | 10.959 |
| 23 | 0.2667 | 12.144 | 14.879 | 10.411 | 19.568 | 23.351 |
| 23 | 0.2677 | 12.150 | 14.881 | 10.418 | 19.540 | 23.325 |
| 23 | 0.2687 | 19.409 | 17.815 | 16.659 | 19.052 | 18.041 |
| 23 | 0.2697 | 8.290  | 8.215  | 7.818  | 20.774 | 13.428 |
| 23 | 0.2707 | 9.817  | 7.129  | 7.999  | 19.189 | 9.777  |
| 23 | 0.2717 | 9.792  | 7.145  | 8.037  | 19.063 | 9.719  |
| 23 | 0.2727 | 9.456  | 9.692  | 8.105  | 17.640 | 10.487 |
| 23 | 0.2737 | 10.489 | 10.178 | 13.355 | 12.418 | 11.454 |
| 23 | 0.2747 | 21.749 | 18.997 | 21.600 | 17.784 | 16.801 |
| 23 | 0.2757 | 19.412 | 13.168 | 12.605 | 20.071 | 21.113 |
| 23 | 0.2767 | 14.238 | 10.693 | 13.918 | 22.507 | 12.876 |
| 23 | 0.2777 | 18.994 | 9.604  | 11.413 | 12.402 | 13.900 |
| 23 | 0.2787 | 9.263  | 15.249 | 10.393 | 9.431  | 7.309  |
| 23 | 0.2797 | 7.724  | 8.672  | 8.395  | 6.075  | 5.929  |
| 23 | 0.2807 | 12.605 | 13.171 | 9.837  | 14.278 | 6.107  |
| 23 | 0.2817 | 18.724 | 16.509 | 11.887 | 28.774 | 14.409 |
| 23 | 0.2827 | 19.424 | 16.676 | 12.401 | 25.050 | 17.853 |
| 23 | 0.2837 | 20.149 | 13.262 | 17.258 | 13.370 | 9.766  |
| 23 | 0.2847 | 23.852 | 14.219 | 23.329 | 19.023 | 7.915  |
| 23 | 0.2857 | 12.715 | 10.979 | 13.002 | 23.231 | 5.928  |
| 23 | 0.2867 | 19.101 | 19.065 | 16.921 | 7.028  | 9.092  |
| 23 | 0.2877 | 23.334 | 25.705 | 24.344 | 7.521  | 9.708  |
| 23 | 0.2887 | 11.778 | 11.187 | 7.308  | 14.707 | 8.743  |
| 23 | 0.2897 | 16.777 | 14.880 | 11.211 | 10.598 | 12.624 |
| 23 | 0.2907 | 17.061 | 14.252 | 14.862 | 22.325 | 22.946 |
| 23 | 0.2917 | 14.805 | 10.208 | 9.795  | 27.364 | 17.108 |
| 23 | 0.2927 | 23.238 | 19.164 | 17.604 | 16.894 | 23.990 |
| 23 | 0.2937 | 17.090 | 20.460 | 15.340 | 17.632 | 23.990 |
| 23 | 0.2947 | 20.266 | 16.172 | 14.664 | 17.422 | 10.991 |
| 23 | 0.2957 | 7.760  | 9.312  | 8.328  | 10.936 | 15.754 |
| 23 | 0.2967 | 6.696  | 11.042 | 7.065  | 19.412 | 17.954 |
| 23 | 0.2977 | 6.696  | 11.042 | 7.065  | 19.411 | 17.955 |
| 23 | 0.2987 | 9.638  | 10.493 | 7.219  | 17.257 | 7.026  |
| 23 | 0.2997 | 5.892  | 7.001  | 6.543  | 9.939  | 11.516 |
| 23 | 0.3007 | 13.310 | 9.405  | 12.246 | 12.725 | 3.177  |
| 23 | 0.3017 | 9.136  | 9.094  | 13.936 | 15.654 | 11.698 |
| 23 | 0.3027 | 9.401  | 14.986 | 14.428 | 17.481 | 25.501 |
| 23 | 0.3037 | 9.504  | 15.056 | 14.477 | 17.370 | 25.462 |
| 23 | 0.3047 | 17.068 | 18.426 | 12.708 | 26.515 | 14.455 |
| 23 | 0.3057 | 15.957 | 15.293 | 9.473  | 38.313 | 19.240 |
| 23 | 0.3067 | 20.933 | 18.811 | 13.331 | 39.017 | 22.306 |
| 23 | 0.3077 | 14.809 | 16.795 | 15.182 | 29.400 | 16.572 |
| 23 | 0.3087 | 16.200 | 10.137 | 9.027  | 28.172 | 12.036 |
| 23 | 0.3097 | 12.537 | 22.617 | 14.402 | 39.041 | 18.909 |
| 23 | 0.3107 | 21.005 | 19.689 | 20.748 | 19.892 | 15.218 |
| 23 | 0.3117 | 7.263  | 15.743 | 11.714 | 14.468 | 6.771  |
| 23 | 0.3127 | 13.455 | 19.882 | 17.020 | 14.269 | 6.776  |
| 23 | 0.3137 | 8.928  | 8.619  | 11.188 | 19.444 | 9.627  |
| 23 | 0.3147 | 23.521 | 18.422 | 18.925 | 12.049 | 9.284  |

|    |        |        |        |        |        |        |
|----|--------|--------|--------|--------|--------|--------|
| 23 | 0.3157 | 20.853 | 21.285 | 18.396 | 15.365 | 10.946 |
| 23 | 0.3167 | 20.107 | 18.171 | 16.480 | 10.417 | 10.197 |
| 23 | 0.3177 | 18.710 | 11.057 | 9.351  | 14.828 | 18.199 |
| 23 | 0.3187 | 13.870 | 19.836 | 12.776 | 25.731 | 14.590 |
| 23 | 0.3197 | 14.129 | 15.631 | 13.954 | 27.747 | 11.010 |
| 23 | 0.3207 | 14.123 | 15.620 | 13.947 | 27.728 | 11.016 |
| 23 | 0.3217 | 22.983 | 20.758 | 22.601 | 14.566 | 9.003  |
| 23 | 0.3227 | 20.481 | 20.023 | 15.315 | 14.563 | 12.621 |
| 23 | 0.3237 | 20.474 | 20.087 | 15.313 | 14.637 | 12.665 |
| 23 | 0.3247 | 25.133 | 19.579 | 16.700 | 13.729 | 15.441 |
| 23 | 0.3257 | 24.686 | 18.065 | 10.878 | 12.356 | 12.011 |
| 23 | 0.3267 | 11.279 | 19.200 | 11.200 | 23.364 | 9.332  |
| 23 | 0.3277 | 11.455 | 9.343  | 9.436  | 16.658 | 12.874 |
| 23 | 0.3287 | 12.099 | 7.424  | 12.466 | 15.107 | 17.701 |
| 23 | 0.3297 | 13.136 | 10.045 | 13.927 | 8.489  | 20.056 |
| 23 | 0.3307 | 5.429  | 8.540  | 3.421  | 15.142 | 14.551 |
| 23 | 0.3317 | 15.112 | 10.554 | 7.472  | 18.848 | 11.680 |
| 23 | 0.3327 | 12.621 | 12.262 | 8.590  | 15.961 | 12.937 |
| 23 | 0.3337 | 11.032 | 13.302 | 10.027 | 13.466 | 14.122 |
| 23 | 0.3347 | 19.320 | 12.193 | 12.736 | 22.949 | 6.199  |
| 23 | 0.3357 | 9.178  | 11.949 | 9.013  | 24.862 | 6.957  |
| 23 | 0.3367 | 28.727 | 28.222 | 28.785 | 18.806 | 20.551 |
| 23 | 0.3377 | 7.911  | 11.631 | 9.617  | 7.437  | 3.666  |
| 23 | 0.3387 | 15.931 | 10.241 | 10.468 | 10.678 | 14.679 |
| 23 | 0.3397 | 6.869  | 9.438  | 10.265 | 10.335 | 15.236 |
| 23 | 0.3407 | 7.308  | 12.011 | 13.193 | 18.334 | 28.356 |
| 23 | 0.3417 | 14.473 | 18.946 | 23.270 | 20.033 | 30.263 |
| 23 | 0.3427 | 20.665 | 18.826 | 20.371 | 14.661 | 18.434 |
| 23 | 0.3437 | 14.188 | 9.030  | 10.032 | 18.970 | 19.748 |
| 23 | 0.3447 | 8.772  | 5.964  | 5.663  | 15.374 | 10.771 |
| 23 | 0.3457 | 5.973  | 9.132  | 9.536  | 16.178 | 13.876 |
| 23 | 0.3467 | 11.767 | 10.933 | 14.086 | 14.218 | 10.490 |
| 23 | 0.3477 | 10.559 | 12.562 | 8.243  | 14.798 | 8.845  |
| 23 | 0.3487 | 12.045 | 8.740  | 15.061 | 11.246 | 20.785 |
| 23 | 0.3497 | 15.107 | 13.291 | 12.250 | 7.231  | 17.434 |
| 23 | 0.3507 | 12.667 | 11.587 | 11.634 | 16.445 | 25.969 |
| 23 | 0.3517 | 11.301 | 12.757 | 13.650 | 12.683 | 17.035 |
| 23 | 0.3527 | 13.759 | 14.569 | 14.796 | 13.524 | 19.730 |
| 23 | 0.3537 | 12.506 | 15.293 | 13.398 | 11.502 | 12.684 |
| 23 | 0.3547 | 9.148  | 12.432 | 9.741  | 16.371 | 10.080 |
| 23 | 0.3557 | 5.046  | 6.580  | 4.856  | 4.423  | 2.274  |
| 23 | 0.3567 | 3.481  | 6.947  | 4.055  | 13.050 | 6.096  |
| 23 | 0.3577 | 7.791  | 13.547 | 8.127  | 27.289 | 10.370 |
| 23 | 0.3587 | 17.031 | 17.364 | 14.926 | 16.440 | 22.946 |
| 23 | 0.3597 | 10.885 | 13.988 | 7.321  | 25.545 | 13.648 |
| 23 | 0.3607 | 10.562 | 12.748 | 8.695  | 9.802  | 10.383 |
| 23 | 0.3617 | 10.609 | 12.864 | 8.791  | 9.772  | 10.468 |
| 23 | 0.3627 | 6.884  | 15.077 | 9.552  | 21.720 | 14.039 |
| 23 | 0.3637 | 11.163 | 15.866 | 21.018 | 14.606 | 8.170  |
| 23 | 0.3647 | 15.245 | 14.333 | 21.370 | 8.757  | 12.370 |

|    |        |        |        |        |        |        |
|----|--------|--------|--------|--------|--------|--------|
| 23 | 0.3657 | 11.278 | 6.318  | 8.525  | 11.849 | 6.701  |
| 23 | 0.3667 | 16.870 | 12.343 | 16.747 | 10.776 | 13.135 |
| 23 | 0.3677 | 10.376 | 9.087  | 8.585  | 14.304 | 17.846 |
| 23 | 0.3687 | 8.498  | 7.994  | 9.979  | 10.415 | 6.554  |
| 23 | 0.3697 | 3.907  | 2.203  | 3.987  | 13.990 | 4.829  |
| 23 | 0.3707 | 8.823  | 11.269 | 11.407 | 9.981  | 6.212  |
| 23 | 0.3717 | 7.361  | 9.905  | 7.679  | 15.600 | 6.848  |
| 23 | 0.3727 | 9.958  | 12.107 | 12.482 | 17.414 | 17.402 |
| 23 | 0.3737 | 9.449  | 9.442  | 14.039 | 11.339 | 12.182 |
| 23 | 0.3747 | 6.850  | 8.319  | 7.607  | 14.351 | 15.971 |
| 23 | 0.3757 | 8.665  | 8.172  | 9.062  | 16.787 | 8.876  |
| 23 | 0.3767 | 10.576 | 9.333  | 8.971  | 13.226 | 4.674  |
| 23 | 0.3777 | 13.341 | 9.259  | 18.576 | 13.847 | 11.727 |
| 23 | 0.3787 | 8.397  | 10.523 | 10.166 | 9.460  | 14.909 |
| 23 | 0.3797 | 6.937  | 7.787  | 9.204  | 5.201  | 13.466 |
| 23 | 0.3807 | 12.043 | 16.585 | 13.440 | 16.159 | 13.762 |
| 23 | 0.3817 | 11.119 | 18.927 | 21.279 | 12.241 | 15.355 |
| 23 | 0.3827 | 5.840  | 12.817 | 9.802  | 15.631 | 7.614  |
| 23 | 0.3837 | 14.204 | 19.902 | 21.106 | 14.252 | 12.713 |
| 23 | 0.3847 | 15.181 | 13.027 | 15.608 | 8.871  | 14.568 |
| 23 | 0.3857 | 5.329  | 4.370  | 6.649  | 12.570 | 12.744 |
| 23 | 0.3867 | 5.553  | 6.394  | 6.577  | 6.566  | 6.929  |
| 23 | 0.3877 | 16.809 | 14.245 | 23.112 | 11.094 | 16.550 |
| 23 | 0.3887 | 13.027 | 11.000 | 7.004  | 13.697 | 25.889 |
| 23 | 0.3897 | 14.451 | 11.679 | 12.054 | 16.625 | 14.609 |
| 23 | 0.3907 | 17.237 | 16.324 | 11.671 | 14.044 | 20.310 |
| 23 | 0.3917 | 16.595 | 11.251 | 13.732 | 17.994 | 18.351 |
| 23 | 0.3927 | 11.960 | 13.008 | 12.900 | 17.716 | 28.072 |
| 23 | 0.3937 | 11.607 | 11.945 | 8.497  | 5.982  | 12.076 |
| 23 | 0.3947 | 8.793  | 10.624 | 7.336  | 7.127  | 12.638 |
| 23 | 0.3957 | 8.542  | 9.007  | 7.202  | 4.245  | 17.095 |
| 23 | 0.3967 | 9.407  | 9.056  | 9.207  | 14.358 | 15.777 |
| 23 | 0.3977 | 11.666 | 10.218 | 10.229 | 24.673 | 21.299 |
| 23 | 0.3987 | 15.777 | 16.445 | 15.575 | 20.738 | 19.170 |
| 23 | 0.3997 | 9.125  | 9.555  | 8.949  | 22.544 | 10.159 |
| 23 | 0.4007 | 7.283  | 11.524 | 8.058  | 30.087 | 9.895  |
| 23 | 0.4017 | 4.488  | 3.833  | 2.984  | 23.718 | 10.437 |
| 23 | 0.4027 | 11.266 | 10.440 | 14.405 | 14.429 | 25.161 |
| 23 | 0.4037 | 6.064  | 8.375  | 10.553 | 8.378  | 25.625 |
| 23 | 0.4047 | 12.167 | 14.176 | 15.528 | 12.731 | 30.500 |
| 23 | 0.4057 | 10.888 | 14.335 | 15.188 | 12.483 | 14.563 |
| 23 | 0.4067 | 8.237  | 13.537 | 14.726 | 10.995 | 6.998  |
| 23 | 0.4077 | 7.434  | 16.991 | 7.457  | 19.222 | 17.577 |
| 23 | 0.4087 | 19.479 | 9.014  | 15.181 | 15.372 | 19.151 |
| 23 | 0.4097 | 9.355  | 13.226 | 12.195 | 15.121 | 8.612  |
| 23 | 0.4107 | 7.659  | 14.380 | 12.844 | 22.961 | 12.929 |
| 23 | 0.4117 | 14.585 | 18.087 | 16.999 | 15.706 | 18.588 |
| 23 | 0.4127 | 10.871 | 16.078 | 10.671 | 8.525  | 10.869 |
| 23 | 0.4137 | 9.274  | 10.070 | 10.805 | 10.434 | 14.831 |
| 23 | 0.4147 | 13.999 | 12.998 | 15.139 | 9.261  | 19.781 |

|    |        |        |        |        |        |        |
|----|--------|--------|--------|--------|--------|--------|
| 23 | 0.4157 | 20.442 | 15.041 | 19.654 | 8.598  | 16.382 |
| 23 | 0.4167 | 18.493 | 22.829 | 23.104 | 13.014 | 14.815 |
| 23 | 0.4177 | 18.462 | 19.117 | 25.368 | 13.632 | 17.252 |
| 23 | 0.4187 | 14.297 | 10.498 | 16.610 | 14.070 | 13.154 |
| 23 | 0.4197 | 9.900  | 9.548  | 12.898 | 11.331 | 19.521 |
| 23 | 0.4207 | 6.566  | 7.524  | 10.558 | 7.883  | 21.918 |
| 23 | 0.4217 | 8.469  | 14.990 | 12.894 | 9.803  | 12.594 |
| 23 | 0.4227 | 12.642 | 14.934 | 18.760 | 8.386  | 10.960 |
| 23 | 0.4237 | 7.000  | 12.665 | 13.212 | 14.628 | 13.450 |
| 23 | 0.4247 | 14.309 | 16.836 | 23.801 | 6.236  | 7.279  |
| 23 | 0.4257 | 13.379 | 12.169 | 19.083 | 9.117  | 12.770 |
| 23 | 0.4267 | 16.277 | 11.639 | 18.188 | 8.540  | 12.019 |
| 23 | 0.4277 | 13.894 | 17.951 | 21.422 | 8.565  | 13.249 |
| 23 | 0.4287 | 10.015 | 9.783  | 14.351 | 10.895 | 11.852 |
| 23 | 0.4297 | 10.383 | 8.101  | 11.723 | 9.404  | 11.693 |
| 23 | 0.4307 | 10.427 | 9.938  | 10.066 | 13.783 | 20.768 |
| 23 | 0.4317 | 17.777 | 17.109 | 14.713 | 4.795  | 16.349 |
| 23 | 0.4327 | 14.278 | 17.002 | 16.613 | 12.083 | 23.476 |
| 23 | 0.4337 | 17.145 | 20.930 | 23.615 | 12.618 | 19.203 |
| 23 | 0.4347 | 10.090 | 19.289 | 10.096 | 14.490 | 13.812 |
| 23 | 0.4357 | 18.010 | 18.969 | 15.495 | 8.300  | 27.383 |
| 23 | 0.4367 | 20.338 | 17.607 | 18.357 | 11.920 | 19.049 |
| 23 | 0.4377 | 21.002 | 17.753 | 17.624 | 10.729 | 31.326 |
| 23 | 0.4387 | 21.316 | 19.870 | 20.777 | 22.154 | 26.721 |
| 23 | 0.4397 | 22.866 | 25.370 | 28.844 | 15.648 | 22.694 |
| 23 | 0.4407 | 14.363 | 13.765 | 14.069 | 18.441 | 16.784 |
| 23 | 0.4417 | 12.596 | 13.385 | 11.966 | 12.615 | 9.286  |
| 23 | 0.4427 | 11.337 | 16.352 | 19.053 | 13.136 | 10.246 |
| 23 | 0.4437 | 13.336 | 16.731 | 18.304 | 11.954 | 12.693 |
| 23 | 0.4447 | 10.110 | 15.268 | 15.917 | 7.066  | 7.504  |
| 23 | 0.4457 | 17.773 | 14.342 | 16.386 | 6.029  | 9.716  |
| 23 | 0.4467 | 14.462 | 8.911  | 8.475  | 10.790 | 15.735 |
| 23 | 0.4477 | 9.411  | 8.789  | 9.309  | 16.541 | 23.039 |
| 23 | 0.4487 | 11.388 | 7.773  | 12.103 | 13.220 | 13.333 |
| 23 | 0.4497 | 15.608 | 19.592 | 16.918 | 13.760 | 13.883 |
| 23 | 0.4507 | 19.520 | 18.935 | 21.537 | 12.676 | 14.571 |
| 23 | 0.4517 | 19.524 | 17.262 | 18.593 | 11.262 | 22.895 |
| 23 | 0.4527 | 16.606 | 15.056 | 12.243 | 8.169  | 19.865 |
| 23 | 0.4537 | 11.018 | 15.029 | 16.445 | 24.459 | 20.715 |
| 23 | 0.4547 | 9.445  | 12.090 | 10.122 | 10.999 | 11.149 |
| 23 | 0.4557 | 15.123 | 12.629 | 13.262 | 11.294 | 5.520  |
| 23 | 0.4567 | 19.746 | 21.434 | 21.158 | 19.124 | 10.441 |
| 23 | 0.4577 | 23.360 | 23.260 | 22.434 | 14.444 | 15.348 |
| 23 | 0.4587 | 19.829 | 15.877 | 15.227 | 8.653  | 13.922 |
| 23 | 0.4597 | 15.039 | 13.253 | 17.686 | 9.940  | 9.507  |
| 23 | 0.4607 | 12.189 | 15.907 | 20.214 | 11.045 | 10.329 |
| 23 | 0.4617 | 16.356 | 13.449 | 14.902 | 12.919 | 15.363 |
| 23 | 0.4627 | 10.884 | 15.397 | 11.355 | 10.739 | 20.154 |
| 23 | 0.4637 | 13.681 | 17.032 | 14.709 | 12.854 | 16.170 |
| 23 | 0.4647 | 14.595 | 12.519 | 16.710 | 12.761 | 13.660 |

|    |        |        |        |        |        |        |
|----|--------|--------|--------|--------|--------|--------|
| 23 | 0.4657 | 6.887  | 9.097  | 8.952  | 11.032 | 9.584  |
| 23 | 0.4667 | 17.252 | 15.972 | 17.796 | 6.776  | 6.979  |
| 23 | 0.4677 | 13.528 | 11.522 | 11.852 | 9.528  | 13.883 |
| 23 | 0.4687 | 25.396 | 18.724 | 18.684 | 7.895  | 27.518 |
| 23 | 0.4697 | 16.067 | 14.465 | 24.742 | 10.932 | 18.071 |
| 23 | 0.4707 | 17.044 | 13.178 | 25.044 | 12.374 | 18.164 |
| 23 | 0.4717 | 14.216 | 9.073  | 14.640 | 3.679  | 10.429 |
| 23 | 0.4727 | 13.650 | 15.223 | 17.817 | 8.826  | 8.933  |
| 23 | 0.4737 | 23.678 | 28.665 | 25.186 | 15.047 | 14.681 |
| 23 | 0.4747 | 11.222 | 10.618 | 13.321 | 9.450  | 16.547 |
| 23 | 0.4757 | 20.188 | 14.059 | 20.109 | 15.794 | 11.420 |
| 23 | 0.4767 | 23.417 | 23.705 | 26.338 | 16.701 | 17.474 |
| 23 | 0.4777 | 18.301 | 15.819 | 19.773 | 10.126 | 14.298 |
| 23 | 0.4787 | 25.475 | 22.785 | 11.463 | 11.999 | 13.191 |
| 23 | 0.4797 | 22.072 | 17.110 | 25.071 | 9.176  | 7.893  |
| 23 | 0.4807 | 8.140  | 4.481  | 6.135  | 5.779  | 7.939  |
| 23 | 0.4817 | 14.233 | 12.349 | 16.763 | 6.548  | 7.907  |
| 23 | 0.4827 | 11.769 | 18.791 | 18.248 | 12.115 | 12.002 |
| 23 | 0.4837 | 12.053 | 7.128  | 13.004 | 7.180  | 11.937 |
| 23 | 0.4847 | 10.600 | 5.590  | 7.612  | 8.467  | 5.058  |
| 23 | 0.4857 | 9.562  | 12.980 | 19.847 | 10.603 | 6.796  |
| 23 | 0.4867 | 4.879  | 6.804  | 11.152 | 8.577  | 12.955 |
| 23 | 0.4877 | 6.230  | 12.802 | 11.430 | 12.722 | 9.332  |
| 23 | 0.4887 | 8.760  | 8.915  | 15.202 | 9.610  | 3.304  |
| 23 | 0.4897 | 10.090 | 18.623 | 16.534 | 16.911 | 11.929 |
| 23 | 0.4907 | 10.092 | 18.611 | 16.529 | 16.982 | 12.026 |
| 23 | 0.4917 | 6.565  | 8.870  | 10.270 | 14.791 | 18.655 |
| 23 | 0.4927 | 11.131 | 17.216 | 20.843 | 9.761  | 6.429  |
| 23 | 0.4937 | 0.000  | 0.000  | 0.000  | 0.000  | 0.000  |
| 24 | 0.0020 | 0.000  | 0.000  | 0.000  | 0.000  | 0.000  |
| 24 | 0.0030 | 15.568 | 6.074  | 13.730 | 8.531  | 19.882 |
| 24 | 0.0040 | 25.640 | 20.560 | 22.515 | 17.256 | 17.440 |
| 24 | 0.0050 | 8.238  | 8.796  | 12.169 | 12.957 | 12.533 |
| 24 | 0.0060 | 17.143 | 20.571 | 19.933 | 17.569 | 11.343 |
| 24 | 0.0070 | 15.850 | 12.236 | 13.911 | 13.020 | 10.240 |
| 24 | 0.0080 | 16.691 | 12.320 | 16.056 | 18.273 | 4.493  |
| 24 | 0.0090 | 15.890 | 11.467 | 13.893 | 15.066 | 20.168 |
| 24 | 0.0100 | 13.035 | 10.551 | 17.672 | 9.450  | 18.417 |
| 24 | 0.0110 | 12.834 | 10.553 | 17.653 | 9.408  | 17.452 |
| 24 | 0.0120 | 11.391 | 7.311  | 11.411 | 14.820 | 6.136  |
| 24 | 0.0130 | 9.117  | 13.540 | 12.067 | 14.574 | 23.507 |
| 24 | 0.0140 | 8.414  | 12.750 | 12.467 | 13.423 | 13.165 |
| 24 | 0.0150 | 23.941 | 17.346 | 23.581 | 5.781  | 13.966 |
| 24 | 0.0160 | 20.844 | 20.801 | 20.506 | 7.761  | 13.589 |
| 24 | 0.0170 | 11.138 | 12.174 | 14.438 | 10.390 | 15.047 |
| 24 | 0.0180 | 17.899 | 13.684 | 13.466 | 13.354 | 18.372 |
| 24 | 0.0190 | 24.212 | 17.836 | 21.902 | 13.684 | 15.953 |
| 24 | 0.0200 | 22.014 | 18.653 | 25.725 | 12.449 | 10.218 |
| 24 | 0.0210 | 21.722 | 16.989 | 15.366 | 13.478 | 10.405 |
| 24 | 0.0220 | 12.445 | 11.107 | 6.592  | 7.773  | 9.047  |

|    |        |        |        |        |        |        |
|----|--------|--------|--------|--------|--------|--------|
| 24 | 0.0230 | 13.324 | 17.045 | 8.073  | 17.202 | 14.505 |
| 24 | 0.0240 | 19.832 | 26.443 | 16.714 | 19.445 | 13.800 |
| 24 | 0.0250 | 11.733 | 12.922 | 13.022 | 9.484  | 7.114  |
| 24 | 0.0260 | 19.162 | 10.385 | 15.814 | 13.120 | 8.091  |
| 24 | 0.0270 | 14.508 | 14.292 | 12.852 | 6.479  | 6.761  |
| 24 | 0.0280 | 18.881 | 18.996 | 17.222 | 6.975  | 11.013 |
| 24 | 0.0290 | 19.556 | 20.293 | 16.470 | 12.181 | 10.297 |
| 24 | 0.0300 | 19.810 | 15.183 | 16.726 | 19.701 | 15.382 |
| 24 | 0.0310 | 23.407 | 13.422 | 19.964 | 8.612  | 14.688 |
| 24 | 0.0320 | 25.024 | 18.495 | 20.126 | 5.355  | 14.546 |
| 24 | 0.0330 | 24.586 | 23.413 | 19.331 | 7.505  | 16.334 |
| 24 | 0.0340 | 15.719 | 9.409  | 9.056  | 8.700  | 5.953  |
| 24 | 0.0350 | 27.806 | 24.444 | 20.173 | 4.893  | 12.187 |
| 24 | 0.0360 | 45.262 | 32.863 | 31.125 | 11.728 | 30.325 |
| 24 | 0.0370 | 25.585 | 16.652 | 19.737 | 5.317  | 12.104 |
| 24 | 0.0380 | 27.761 | 22.137 | 25.914 | 8.498  | 28.687 |
| 24 | 0.0390 | 20.934 | 13.764 | 15.046 | 10.917 | 21.206 |
| 24 | 0.0400 | 15.038 | 13.897 | 15.591 | 13.767 | 18.149 |
| 24 | 0.0410 | 13.313 | 10.041 | 11.945 | 23.266 | 9.838  |
| 24 | 0.0420 | 15.122 | 16.107 | 19.240 | 6.474  | 20.592 |
| 24 | 0.0430 | 8.992  | 9.719  | 6.588  | 9.226  | 9.989  |
| 24 | 0.0440 | 14.398 | 12.724 | 17.216 | 7.925  | 12.426 |
| 24 | 0.0450 | 24.604 | 20.905 | 20.613 | 14.784 | 15.603 |
| 24 | 0.0460 | 37.728 | 28.324 | 27.192 | 16.709 | 15.152 |
| 24 | 0.0470 | 16.148 | 14.067 | 14.733 | 18.410 | 10.882 |
| 24 | 0.0480 | 15.537 | 14.325 | 14.655 | 21.417 | 18.719 |
| 24 | 0.0490 | 28.482 | 22.371 | 23.777 | 22.399 | 19.613 |
| 24 | 0.0500 | 39.639 | 21.766 | 32.617 | 19.471 | 28.411 |
| 24 | 0.0510 | 17.394 | 16.709 | 23.167 | 13.436 | 18.533 |
| 24 | 0.0520 | 15.468 | 18.712 | 21.027 | 9.262  | 8.938  |
| 24 | 0.0530 | 17.662 | 12.346 | 15.402 | 13.408 | 8.131  |
| 24 | 0.0540 | 16.642 | 15.656 | 17.621 | 19.198 | 10.185 |
| 24 | 0.0550 | 14.275 | 13.578 | 13.028 | 24.569 | 3.006  |
| 24 | 0.0560 | 25.243 | 17.599 | 25.079 | 16.106 | 12.382 |
| 24 | 0.0570 | 16.727 | 13.682 | 15.953 | 13.575 | 12.042 |
| 24 | 0.0580 | 16.730 | 15.168 | 14.439 | 11.902 | 10.421 |
| 24 | 0.0590 | 4.954  | 8.825  | 8.801  | 15.478 | 5.601  |
| 24 | 0.0600 | 14.549 | 12.528 | 15.018 | 9.170  | 14.652 |
| 24 | 0.0610 | 15.336 | 17.888 | 16.856 | 4.831  | 18.451 |
| 24 | 0.0620 | 18.997 | 11.386 | 12.741 | 18.313 | 10.067 |
| 24 | 0.0630 | 17.400 | 14.401 | 15.422 | 13.383 | 11.902 |
| 24 | 0.0640 | 13.042 | 5.039  | 9.057  | 12.897 | 10.460 |
| 24 | 0.0650 | 13.563 | 15.667 | 13.632 | 21.701 | 5.098  |
| 24 | 0.0660 | 21.454 | 22.909 | 22.213 | 18.750 | 17.718 |
| 24 | 0.0670 | 25.653 | 15.946 | 16.041 | 15.265 | 12.359 |
| 24 | 0.0680 | 23.667 | 17.838 | 17.488 | 19.869 | 10.547 |
| 24 | 0.0690 | 23.941 | 15.536 | 17.571 | 19.780 | 12.862 |
| 24 | 0.0700 | 14.014 | 9.102  | 10.649 | 17.878 | 17.027 |
| 24 | 0.0710 | 6.392  | 4.756  | 4.898  | 15.631 | 4.685  |
| 24 | 0.0720 | 22.598 | 19.661 | 19.572 | 23.506 | 14.566 |

|    |        |        |        |        |        |        |
|----|--------|--------|--------|--------|--------|--------|
| 24 | 0.0730 | 10.195 | 10.111 | 11.951 | 7.368  | 10.922 |
| 24 | 0.0740 | 23.989 | 15.255 | 20.824 | 8.092  | 9.229  |
| 24 | 0.0750 | 24.592 | 15.727 | 23.496 | 21.410 | 20.501 |
| 24 | 0.0760 | 16.938 | 10.859 | 14.772 | 16.438 | 8.016  |
| 24 | 0.0770 | 25.265 | 20.402 | 23.008 | 19.594 | 8.501  |
| 24 | 0.0780 | 14.044 | 10.822 | 10.786 | 16.521 | 9.536  |
| 24 | 0.0790 | 27.721 | 20.773 | 21.822 | 18.917 | 13.252 |
| 24 | 0.0800 | 22.820 | 13.835 | 18.036 | 12.351 | 14.056 |
| 24 | 0.0810 | 9.310  | 11.374 | 11.451 | 8.535  | 8.389  |
| 24 | 0.0820 | 15.925 | 18.176 | 15.114 | 15.896 | 13.694 |
| 24 | 0.0830 | 23.966 | 23.613 | 18.314 | 18.539 | 17.404 |
| 24 | 0.0840 | 35.646 | 17.241 | 17.753 | 15.166 | 19.773 |
| 24 | 0.0850 | 21.190 | 9.114  | 13.063 | 18.379 | 12.785 |
| 24 | 0.0860 | 18.237 | 4.522  | 11.104 | 18.447 | 14.792 |
| 24 | 0.0870 | 10.387 | 7.390  | 8.584  | 17.896 | 8.596  |
| 24 | 0.0880 | 34.730 | 12.997 | 25.640 | 13.467 | 17.144 |
| 24 | 0.0890 | 28.460 | 13.456 | 20.008 | 16.132 | 11.647 |
| 24 | 0.0900 | 20.487 | 18.053 | 18.840 | 20.141 | 27.448 |
| 24 | 0.0910 | 18.339 | 14.590 | 14.483 | 17.972 | 19.594 |
| 24 | 0.0920 | 13.921 | 11.376 | 11.177 | 13.910 | 13.043 |
| 24 | 0.0930 | 22.593 | 18.030 | 16.393 | 17.277 | 17.241 |
| 24 | 0.0940 | 11.974 | 17.968 | 16.272 | 26.210 | 17.517 |
| 24 | 0.0950 | 15.767 | 18.852 | 14.851 | 19.774 | 23.000 |
| 24 | 0.0960 | 13.104 | 12.617 | 10.779 | 12.741 | 22.476 |
| 24 | 0.0970 | 18.137 | 7.779  | 13.174 | 15.799 | 23.162 |
| 24 | 0.0980 | 16.618 | 3.917  | 11.611 | 12.835 | 9.383  |
| 24 | 0.0990 | 8.952  | 14.720 | 12.532 | 18.843 | 15.063 |
| 24 | 0.1000 | 22.023 | 20.842 | 24.737 | 25.187 | 14.162 |
| 24 | 0.1010 | 15.394 | 19.080 | 21.741 | 21.763 | 13.848 |
| 24 | 0.1020 | 10.189 | 13.034 | 7.376  | 21.676 | 16.779 |
| 24 | 0.1030 | 21.317 | 5.956  | 10.019 | 17.718 | 9.634  |
| 24 | 0.1040 | 16.556 | 9.879  | 11.123 | 16.564 | 29.925 |
| 24 | 0.1050 | 13.433 | 14.520 | 12.843 | 10.836 | 15.492 |
| 24 | 0.1060 | 6.663  | 2.962  | 4.647  | 13.189 | 21.221 |
| 24 | 0.1070 | 20.247 | 10.074 | 16.122 | 11.937 | 20.748 |
| 24 | 0.1080 | 21.372 | 20.281 | 19.863 | 19.413 | 15.087 |
| 24 | 0.1090 | 19.690 | 13.496 | 23.455 | 12.647 | 11.773 |
| 24 | 0.1100 | 12.680 | 12.700 | 14.809 | 17.182 | 3.422  |
| 24 | 0.1110 | 10.763 | 5.356  | 5.945  | 23.602 | 13.738 |
| 24 | 0.1120 | 12.694 | 6.043  | 6.803  | 13.639 | 12.966 |
| 24 | 0.1130 | 15.352 | 5.713  | 9.751  | 18.754 | 16.286 |
| 24 | 0.1140 | 18.056 | 10.066 | 13.616 | 16.202 | 17.034 |
| 24 | 0.1150 | 14.553 | 9.579  | 17.656 | 13.929 | 18.228 |
| 24 | 0.1160 | 9.623  | 4.442  | 7.589  | 9.717  | 14.478 |
| 24 | 0.1170 | 11.214 | 5.450  | 8.603  | 10.930 | 7.002  |
| 24 | 0.1180 | 23.138 | 9.866  | 12.700 | 15.191 | 27.255 |
| 24 | 0.1190 | 15.007 | 9.125  | 16.274 | 18.952 | 26.221 |
| 24 | 0.1200 | 33.242 | 22.177 | 26.950 | 15.599 | 23.806 |
| 24 | 0.1210 | 17.029 | 12.369 | 22.408 | 15.795 | 14.525 |
| 24 | 0.1220 | 9.603  | 4.583  | 12.872 | 13.944 | 20.085 |

|    |        |        |        |        |        |        |
|----|--------|--------|--------|--------|--------|--------|
| 24 | 0.1230 | 23.892 | 15.764 | 16.857 | 21.095 | 16.252 |
| 24 | 0.1240 | 25.617 | 18.311 | 18.086 | 20.386 | 33.922 |
| 24 | 0.1250 | 18.099 | 10.627 | 11.808 | 23.097 | 20.293 |
| 24 | 0.1260 | 12.646 | 6.106  | 7.526  | 28.901 | 23.970 |
| 24 | 0.1270 | 7.259  | 5.989  | 7.032  | 10.887 | 15.821 |
| 24 | 0.1280 | 6.144  | 12.045 | 7.208  | 17.950 | 18.180 |
| 24 | 0.1290 | 10.542 | 7.657  | 11.681 | 12.970 | 22.234 |
| 24 | 0.1300 | 14.934 | 3.737  | 7.414  | 23.300 | 23.640 |
| 24 | 0.1310 | 8.103  | 1.637  | 3.884  | 20.734 | 15.679 |
| 24 | 0.1320 | 18.381 | 5.196  | 9.780  | 17.979 | 16.153 |
| 24 | 0.1330 | 6.859  | 3.184  | 4.449  | 13.365 | 7.565  |
| 24 | 0.1340 | 12.464 | 7.037  | 7.326  | 18.801 | 21.579 |
| 24 | 0.1350 | 12.731 | 4.974  | 13.004 | 20.467 | 20.796 |
| 24 | 0.1360 | 9.881  | 8.202  | 8.180  | 16.399 | 9.192  |
| 24 | 0.1370 | 12.338 | 16.581 | 16.930 | 13.767 | 13.007 |
| 24 | 0.1380 | 13.417 | 13.247 | 13.360 | 9.321  | 11.291 |
| 24 | 0.1390 | 10.036 | 2.704  | 8.562  | 10.558 | 8.509  |
| 24 | 0.1400 | 11.299 | 3.886  | 10.095 | 11.061 | 5.493  |
| 24 | 0.1410 | 13.243 | 3.784  | 8.542  | 9.900  | 6.688  |
| 24 | 0.1420 | 16.855 | 14.030 | 16.033 | 14.634 | 13.975 |
| 24 | 0.1430 | 17.058 | 16.381 | 16.861 | 8.663  | 17.214 |
| 24 | 0.1440 | 16.610 | 9.038  | 15.903 | 15.662 | 13.871 |
| 24 | 0.1450 | 16.140 | 12.445 | 13.990 | 23.748 | 13.764 |
| 24 | 0.1460 | 22.218 | 19.964 | 19.080 | 19.355 | 16.548 |
| 24 | 0.1470 | 15.669 | 10.555 | 6.856  | 9.458  | 19.221 |
| 24 | 0.1480 | 9.982  | 4.766  | 8.927  | 6.525  | 12.341 |
| 24 | 0.1490 | 18.746 | 7.946  | 14.128 | 22.625 | 15.423 |
| 24 | 0.1500 | 35.590 | 16.781 | 21.815 | 17.311 | 16.431 |
| 24 | 0.1510 | 17.180 | 14.875 | 17.490 | 19.451 | 19.550 |
| 24 | 0.1520 | 27.312 | 16.105 | 23.876 | 15.829 | 9.735  |
| 24 | 0.1530 | 21.520 | 12.969 | 17.267 | 15.106 | 13.631 |
| 24 | 0.1540 | 23.646 | 27.035 | 18.495 | 9.116  | 21.234 |
| 24 | 0.1550 | 8.291  | 7.780  | 6.678  | 15.503 | 21.672 |
| 24 | 0.1560 | 22.128 | 6.180  | 10.835 | 11.087 | 6.737  |
| 24 | 0.1570 | 33.647 | 9.502  | 21.002 | 6.497  | 4.470  |
| 24 | 0.1580 | 12.778 | 7.353  | 8.994  | 7.288  | 13.741 |
| 24 | 0.1590 | 12.531 | 6.049  | 10.657 | 11.529 | 12.677 |
| 24 | 0.1600 | 13.568 | 6.658  | 8.393  | 11.201 | 11.003 |
| 24 | 0.1610 | 13.869 | 7.550  | 11.560 | 11.115 | 6.831  |
| 24 | 0.1620 | 12.441 | 11.077 | 16.497 | 17.172 | 18.495 |
| 24 | 0.1630 | 23.434 | 20.428 | 24.203 | 25.458 | 13.868 |
| 24 | 0.1640 | 27.704 | 22.338 | 22.984 | 23.237 | 20.499 |
| 24 | 0.1650 | 27.734 | 22.771 | 23.653 | 22.667 | 20.648 |
| 24 | 0.1660 | 17.199 | 15.336 | 17.737 | 12.000 | 10.869 |
| 24 | 0.1670 | 7.510  | 3.061  | 5.809  | 22.059 | 17.230 |
| 24 | 0.1680 | 8.678  | 7.894  | 7.715  | 23.173 | 17.279 |
| 24 | 0.1690 | 7.285  | 8.932  | 7.038  | 20.257 | 9.711  |
| 24 | 0.1700 | 6.702  | 12.446 | 7.153  | 13.863 | 9.767  |
| 24 | 0.1710 | 8.693  | 15.432 | 11.186 | 22.935 | 15.946 |
| 24 | 0.1720 | 10.228 | 8.984  | 8.329  | 17.283 | 13.038 |



|    |        |        |        |        |        |        |
|----|--------|--------|--------|--------|--------|--------|
| 24 | 0.1730 | 15.341 | 14.580 | 17.046 | 18.100 | 18.739 |
| 24 | 0.1740 | 13.965 | 8.768  | 15.711 | 16.229 | 18.136 |
| 24 | 0.1750 | 10.226 | 13.241 | 13.031 | 10.501 | 12.564 |
| 24 | 0.1760 | 16.488 | 17.978 | 13.002 | 20.466 | 8.778  |
| 24 | 0.1770 | 13.776 | 12.974 | 10.165 | 11.812 | 9.293  |
| 24 | 0.1780 | 18.532 | 19.092 | 16.190 | 11.704 | 22.450 |
| 24 | 0.1790 | 8.880  | 9.247  | 9.239  | 10.891 | 6.646  |
| 24 | 0.1800 | 15.630 | 12.333 | 12.076 | 11.271 | 9.543  |
| 24 | 0.1810 | 13.566 | 12.380 | 8.277  | 13.503 | 22.910 |
| 24 | 0.1820 | 19.673 | 20.416 | 17.805 | 14.540 | 28.366 |
| 24 | 0.1830 | 20.937 | 17.189 | 16.616 | 15.974 | 11.301 |
| 24 | 0.1840 | 21.347 | 13.048 | 15.045 | 13.530 | 17.098 |
| 24 | 0.1850 | 15.985 | 13.100 | 14.882 | 19.885 | 17.780 |
| 24 | 0.1860 | 14.142 | 12.154 | 15.140 | 14.329 | 11.264 |
| 24 | 0.1870 | 23.685 | 15.668 | 23.183 | 14.014 | 19.203 |
| 24 | 0.1880 | 10.408 | 6.913  | 4.473  | 19.387 | 21.392 |
| 24 | 0.1890 | 16.499 | 8.138  | 10.416 | 22.354 | 15.530 |
| 24 | 0.1900 | 5.855  | 6.991  | 3.597  | 18.433 | 13.553 |
| 24 | 0.1910 | 12.356 | 13.556 | 11.286 | 14.934 | 11.316 |
| 24 | 0.1920 | 13.399 | 14.245 | 11.680 | 14.231 | 11.862 |
| 24 | 0.1930 | 8.614  | 8.650  | 6.367  | 15.673 | 10.671 |
| 24 | 0.1940 | 10.216 | 7.517  | 9.477  | 19.729 | 12.479 |
| 24 | 0.1950 | 31.073 | 18.953 | 25.606 | 15.580 | 17.001 |
| 24 | 0.1960 | 5.441  | 4.950  | 9.618  | 15.317 | 9.493  |
| 24 | 0.1970 | 10.110 | 4.614  | 7.002  | 10.977 | 12.975 |
| 24 | 0.1980 | 21.641 | 12.617 | 13.206 | 14.915 | 19.814 |
| 24 | 0.1990 | 18.514 | 11.447 | 11.873 | 18.265 | 13.088 |
| 24 | 0.2000 | 2.858  | 6.367  | 2.039  | 11.794 | 13.094 |
| 24 | 0.2010 | 4.130  | 5.956  | 4.178  | 12.469 | 12.788 |
| 24 | 0.2020 | 5.602  | 5.700  | 5.587  | 11.303 | 14.122 |
| 24 | 0.2030 | 27.614 | 20.587 | 21.921 | 10.795 | 16.073 |
| 24 | 0.2040 | 15.809 | 14.567 | 13.787 | 5.429  | 5.020  |
| 24 | 0.2050 | 11.901 | 11.195 | 8.767  | 15.015 | 19.802 |
| 24 | 0.2060 | 8.663  | 12.303 | 9.575  | 13.265 | 19.588 |
| 24 | 0.2070 | 10.786 | 17.451 | 8.436  | 21.408 | 28.995 |
| 24 | 0.2080 | 17.808 | 16.030 | 12.469 | 15.867 | 15.339 |
| 24 | 0.2090 | 16.193 | 18.023 | 18.341 | 13.171 | 10.506 |
| 24 | 0.2100 | 12.724 | 18.328 | 13.794 | 17.484 | 16.908 |
| 24 | 0.2110 | 8.696  | 7.363  | 4.371  | 12.473 | 9.626  |
| 24 | 0.2120 | 13.208 | 13.338 | 7.949  | 21.843 | 12.034 |
| 24 | 0.2130 | 5.309  | 12.816 | 5.254  | 24.473 | 8.718  |
| 24 | 0.2140 | 18.397 | 27.818 | 14.488 | 21.045 | 14.475 |
| 24 | 0.2150 | 9.351  | 12.727 | 6.993  | 10.189 | 13.210 |
| 24 | 0.2160 | 22.510 | 22.078 | 23.153 | 13.957 | 18.109 |
| 24 | 0.2170 | 15.513 | 24.418 | 19.746 | 24.856 | 23.624 |
| 24 | 0.2180 | 9.294  | 16.058 | 12.158 | 18.283 | 13.963 |
| 24 | 0.2190 | 9.927  | 10.614 | 9.825  | 9.569  | 15.282 |
| 24 | 0.2200 | 12.467 | 9.605  | 8.506  | 19.645 | 11.646 |
| 24 | 0.2210 | 12.695 | 12.378 | 12.671 | 18.117 | 12.767 |
| 24 | 0.2220 | 13.040 | 13.977 | 11.111 | 11.463 | 9.607  |

|    |        |        |        |        |        |        |
|----|--------|--------|--------|--------|--------|--------|
| 24 | 0.2230 | 18.764 | 23.953 | 17.685 | 15.691 | 17.228 |
| 24 | 0.2240 | 14.972 | 15.293 | 22.445 | 10.624 | 19.864 |
| 24 | 0.2250 | 14.738 | 15.173 | 22.267 | 10.577 | 19.671 |
| 24 | 0.2260 | 15.496 | 13.305 | 13.172 | 12.461 | 23.030 |
| 24 | 0.2270 | 14.745 | 13.029 | 8.231  | 13.850 | 9.643  |
| 24 | 0.2280 | 8.192  | 17.659 | 9.069  | 20.375 | 9.402  |
| 24 | 0.2290 | 11.486 | 9.655  | 9.009  | 10.557 | 11.176 |
| 24 | 0.2300 | 15.294 | 11.057 | 9.828  | 10.621 | 19.771 |
| 24 | 0.2310 | 8.905  | 12.658 | 7.349  | 18.341 | 14.369 |
| 24 | 0.2320 | 15.467 | 18.736 | 9.584  | 17.419 | 17.400 |
| 24 | 0.2330 | 14.364 | 11.164 | 4.986  | 10.298 | 25.367 |
| 24 | 0.2340 | 9.529  | 11.397 | 8.672  | 9.969  | 17.555 |
| 24 | 0.2350 | 11.778 | 14.841 | 11.821 | 12.781 | 20.608 |
| 24 | 0.2360 | 9.531  | 12.461 | 7.041  | 10.710 | 15.518 |
| 24 | 0.2370 | 24.034 | 10.455 | 16.732 | 7.179  | 16.441 |
| 24 | 0.2380 | 25.084 | 15.535 | 18.709 | 15.252 | 19.582 |
| 24 | 0.2390 | 13.150 | 9.716  | 8.802  | 10.257 | 22.050 |
| 24 | 0.2400 | 15.194 | 12.703 | 5.699  | 14.102 | 17.704 |
| 24 | 0.2410 | 14.093 | 15.772 | 11.763 | 8.702  | 16.732 |
| 24 | 0.2420 | 15.104 | 13.846 | 12.814 | 18.824 | 19.986 |
| 24 | 0.2430 | 15.679 | 14.110 | 13.072 | 18.783 | 19.979 |
| 24 | 0.2440 | 4.868  | 10.268 | 3.944  | 12.466 | 8.930  |
| 24 | 0.2450 | 12.449 | 10.655 | 10.217 | 13.425 | 21.241 |
| 24 | 0.2460 | 11.791 | 18.436 | 8.693  | 11.700 | 20.470 |
| 24 | 0.2470 | 6.204  | 5.562  | 5.443  | 9.106  | 21.262 |
| 24 | 0.2480 | 6.983  | 10.629 | 8.914  | 14.982 | 28.272 |
| 24 | 0.2490 | 9.821  | 9.525  | 10.170 | 16.189 | 19.531 |
| 24 | 0.2500 | 15.380 | 15.960 | 12.280 | 11.410 | 16.825 |
| 24 | 0.2510 | 12.262 | 6.774  | 7.661  | 6.513  | 26.469 |
| 24 | 0.2520 | 7.564  | 6.382  | 4.392  | 6.970  | 8.694  |
| 24 | 0.2530 | 5.410  | 6.420  | 5.238  | 13.655 | 3.750  |
| 24 | 0.2540 | 6.598  | 5.795  | 5.932  | 8.072  | 11.288 |
| 24 | 0.2550 | 11.900 | 13.738 | 10.231 | 11.070 | 18.443 |
| 24 | 0.2560 | 13.801 | 20.329 | 19.471 | 9.096  | 21.109 |
| 24 | 0.2570 | 6.349  | 15.489 | 13.305 | 13.177 | 21.073 |
| 24 | 0.2580 | 10.406 | 10.712 | 14.621 | 9.745  | 19.885 |
| 24 | 0.2590 | 16.536 | 11.383 | 18.119 | 17.052 | 14.934 |
| 24 | 0.2600 | 8.083  | 5.055  | 6.380  | 22.130 | 26.181 |
| 24 | 0.2610 | 5.791  | 1.487  | 3.202  | 9.649  | 14.385 |
| 24 | 0.2620 | 9.168  | 12.841 | 7.892  | 16.739 | 25.936 |
| 24 | 0.2630 | 10.853 | 8.329  | 5.480  | 15.894 | 17.881 |
| 24 | 0.2640 | 11.118 | 8.900  | 5.351  | 16.773 | 17.746 |
| 24 | 0.2650 | 15.183 | 13.627 | 10.924 | 18.724 | 30.401 |
| 24 | 0.2660 | 16.333 | 19.108 | 16.910 | 18.562 | 16.018 |
| 24 | 0.2670 | 14.532 | 17.552 | 15.532 | 18.662 | 14.661 |
| 24 | 0.2680 | 16.369 | 9.007  | 7.321  | 16.775 | 19.567 |
| 24 | 0.2690 | 16.308 | 8.324  | 7.330  | 13.299 | 19.118 |
| 24 | 0.2700 | 16.518 | 21.074 | 11.039 | 20.400 | 22.420 |
| 24 | 0.2710 | 12.825 | 20.236 | 6.970  | 17.832 | 25.270 |
| 24 | 0.2720 | 22.239 | 25.994 | 21.210 | 21.384 | 35.791 |

|    |        |        |        |        |        |        |
|----|--------|--------|--------|--------|--------|--------|
| 24 | 0.2730 | 15.526 | 11.649 | 11.560 | 24.209 | 14.554 |
| 24 | 0.2740 | 23.367 | 14.985 | 21.681 | 19.018 | 16.842 |
| 24 | 0.2750 | 11.534 | 9.683  | 12.314 | 19.174 | 19.547 |
| 24 | 0.2760 | 11.179 | 8.748  | 12.330 | 18.756 | 19.173 |
| 24 | 0.2770 | 11.266 | 10.579 | 14.910 | 16.525 | 15.848 |
| 24 | 0.2780 | 21.498 | 16.263 | 12.941 | 20.232 | 18.968 |
| 24 | 0.2790 | 18.104 | 18.239 | 11.827 | 8.311  | 19.978 |
| 24 | 0.2800 | 24.822 | 25.331 | 19.983 | 18.407 | 21.197 |
| 24 | 0.2810 | 16.078 | 16.239 | 21.517 | 7.195  | 21.421 |
| 24 | 0.2820 | 17.172 | 17.226 | 19.273 | 17.985 | 23.273 |
| 24 | 0.2830 | 17.416 | 14.291 | 13.307 | 15.913 | 28.202 |
| 24 | 0.2840 | 15.762 | 17.122 | 10.086 | 17.238 | 20.639 |
| 24 | 0.2850 | 17.288 | 24.527 | 16.158 | 19.274 | 15.027 |
| 24 | 0.2860 | 17.324 | 24.687 | 16.098 | 20.037 | 15.065 |
| 24 | 0.2870 | 10.322 | 10.483 | 10.881 | 18.308 | 19.108 |
| 24 | 0.2880 | 7.977  | 10.228 | 5.848  | 16.816 | 18.149 |
| 24 | 0.2890 | 28.185 | 13.595 | 20.106 | 14.946 | 14.953 |
| 24 | 0.2900 | 16.893 | 17.895 | 11.655 | 15.795 | 19.318 |
| 24 | 0.2910 | 12.343 | 13.233 | 11.700 | 15.243 | 24.438 |
| 24 | 0.2920 | 19.101 | 8.136  | 12.598 | 13.840 | 18.155 |
| 24 | 0.2930 | 15.775 | 18.678 | 11.432 | 20.209 | 15.984 |
| 24 | 0.2940 | 11.421 | 8.304  | 7.293  | 14.405 | 8.466  |
| 24 | 0.2950 | 7.722  | 10.228 | 6.892  | 9.873  | 10.856 |
| 24 | 0.2960 | 19.028 | 17.735 | 10.385 | 12.682 | 24.921 |
| 24 | 0.2970 | 14.542 | 7.586  | 7.021  | 10.960 | 22.916 |
| 24 | 0.2980 | 13.637 | 9.849  | 3.528  | 15.979 | 20.619 |
| 24 | 0.2990 | 9.852  | 6.224  | 3.313  | 13.805 | 27.473 |
| 24 | 0.3000 | 18.400 | 6.362  | 10.030 | 16.053 | 25.033 |
| 24 | 0.3010 | 13.138 | 10.595 | 10.826 | 18.016 | 27.860 |
| 24 | 0.3020 | 23.289 | 22.658 | 15.408 | 21.051 | 24.679 |
| 24 | 0.3030 | 15.025 | 12.371 | 9.047  | 13.773 | 30.653 |
| 24 | 0.3040 | 10.787 | 11.357 | 7.552  | 8.880  | 23.847 |
| 24 | 0.3050 | 12.077 | 15.905 | 11.038 | 16.090 | 26.785 |
| 24 | 0.3060 | 13.425 | 8.885  | 9.838  | 11.592 | 26.896 |
| 24 | 0.3070 | 8.331  | 11.364 | 5.660  | 9.151  | 11.897 |
| 24 | 0.3080 | 15.345 | 9.745  | 13.553 | 12.249 | 13.072 |
| 24 | 0.3090 | 24.579 | 15.136 | 18.184 | 19.133 | 16.617 |
| 24 | 0.3100 | 21.354 | 11.420 | 10.620 | 21.682 | 30.437 |
| 24 | 0.3110 | 22.157 | 11.540 | 11.956 | 19.435 | 27.539 |
| 24 | 0.3120 | 23.825 | 16.443 | 15.995 | 13.639 | 28.590 |
| 24 | 0.3130 | 26.228 | 13.711 | 20.408 | 12.973 | 23.141 |
| 24 | 0.3140 | 26.650 | 15.616 | 17.380 | 12.526 | 21.820 |
| 24 | 0.3150 | 16.489 | 8.329  | 6.414  | 12.200 | 30.451 |
| 24 | 0.3160 | 18.740 | 10.062 | 5.461  | 19.053 | 29.554 |
| 24 | 0.3170 | 24.675 | 10.946 | 7.922  | 13.038 | 31.899 |
| 24 | 0.3180 | 22.116 | 9.086  | 14.152 | 18.413 | 35.251 |
| 24 | 0.3190 | 10.461 | 14.233 | 11.808 | 18.506 | 33.026 |
| 24 | 0.3200 | 7.096  | 4.679  | 7.285  | 9.665  | 13.805 |
| 24 | 0.3210 | 13.328 | 12.862 | 14.305 | 10.446 | 13.611 |
| 24 | 0.3220 | 19.764 | 8.968  | 9.123  | 15.717 | 31.407 |

|    |        |        |        |        |        |        |
|----|--------|--------|--------|--------|--------|--------|
| 24 | 0.3230 | 22.098 | 24.694 | 23.069 | 13.301 | 13.808 |
| 24 | 0.3240 | 11.753 | 12.328 | 10.472 | 14.434 | 31.171 |
| 24 | 0.3250 | 16.792 | 16.445 | 16.384 | 12.445 | 26.751 |
| 24 | 0.3260 | 18.762 | 17.514 | 19.225 | 11.772 | 35.195 |
| 24 | 0.3270 | 11.081 | 15.062 | 11.864 | 15.778 | 39.146 |
| 24 | 0.3280 | 14.786 | 16.558 | 14.166 | 14.731 | 30.355 |
| 24 | 0.3290 | 13.883 | 13.503 | 14.933 | 20.765 | 17.655 |
| 24 | 0.3300 | 13.026 | 11.128 | 13.061 | 19.130 | 18.058 |
| 24 | 0.3310 | 21.757 | 13.625 | 10.600 | 21.813 | 31.427 |
| 24 | 0.3320 | 23.118 | 16.611 | 17.985 | 13.505 | 30.101 |
| 24 | 0.3330 | 17.202 | 13.284 | 16.898 | 31.156 | 25.088 |
| 24 | 0.3340 | 15.113 | 8.480  | 12.700 | 23.674 | 29.582 |
| 24 | 0.3350 | 18.546 | 13.345 | 11.749 | 21.176 | 24.814 |
| 24 | 0.3360 | 26.210 | 13.757 | 14.494 | 3.630  | 22.633 |
| 24 | 0.3370 | 2.548  | 2.913  | 0.561  | 8.684  | 10.513 |
| 24 | 0.3380 | 18.165 | 10.547 | 8.202  | 19.987 | 34.854 |
| 24 | 0.3390 | 18.453 | 9.834  | 13.820 | 12.625 | 22.972 |
| 24 | 0.3400 | 11.844 | 4.998  | 7.770  | 15.279 | 17.161 |
| 24 | 0.3410 | 15.241 | 11.610 | 6.604  | 15.147 | 28.974 |
| 24 | 0.3420 | 22.206 | 16.364 | 13.293 | 20.264 | 28.633 |
| 24 | 0.3430 | 35.233 | 20.607 | 22.296 | 18.724 | 24.634 |
| 24 | 0.3440 | 31.294 | 11.640 | 20.650 | 17.807 | 19.582 |
| 24 | 0.3450 | 23.010 | 21.883 | 19.540 | 14.192 | 24.076 |
| 24 | 0.3460 | 19.804 | 18.848 | 13.897 | 15.698 | 19.066 |
| 24 | 0.3470 | 6.892  | 6.575  | 7.579  | 7.506  | 10.145 |
| 24 | 0.3480 | 6.798  | 10.275 | 8.037  | 11.774 | 18.457 |
| 24 | 0.3490 | 9.646  | 9.289  | 10.465 | 14.757 | 22.238 |
| 24 | 0.3500 | 15.169 | 10.171 | 10.753 | 15.382 | 34.144 |
| 24 | 0.3510 | 7.701  | 9.627  | 5.995  | 15.295 | 10.697 |
| 24 | 0.3520 | 16.366 | 12.310 | 6.818  | 14.835 | 32.741 |
| 24 | 0.3530 | 10.854 | 12.273 | 4.256  | 20.977 | 20.053 |
| 24 | 0.3540 | 17.499 | 15.627 | 17.633 | 26.444 | 21.324 |
| 24 | 0.3550 | 18.013 | 11.265 | 13.703 | 28.461 | 23.314 |
| 24 | 0.3560 | 23.972 | 11.506 | 14.683 | 22.263 | 28.539 |
| 24 | 0.3570 | 25.238 | 12.028 | 15.293 | 22.346 | 29.057 |
| 24 | 0.3580 | 20.793 | 14.291 | 17.210 | 17.001 | 26.170 |
| 24 | 0.3590 | 21.433 | 12.625 | 19.457 | 14.321 | 36.384 |
| 24 | 0.3600 | 8.466  | 7.290  | 6.978  | 24.447 | 40.517 |
| 24 | 0.3610 | 12.939 | 10.606 | 10.196 | 16.464 | 25.496 |
| 24 | 0.3620 | 13.908 | 13.744 | 10.913 | 17.723 | 25.775 |
| 24 | 0.3630 | 10.503 | 9.004  | 9.322  | 17.430 | 28.119 |
| 24 | 0.3640 | 14.670 | 8.710  | 10.112 | 23.782 | 21.280 |
| 24 | 0.3650 | 15.976 | 4.751  | 9.610  | 19.725 | 21.513 |
| 24 | 0.3660 | 15.927 | 5.185  | 10.687 | 20.565 | 26.673 |
| 24 | 0.3670 | 15.801 | 13.281 | 10.560 | 22.052 | 35.771 |
| 24 | 0.3680 | 15.567 | 15.192 | 13.245 | 20.120 | 38.390 |
| 24 | 0.3690 | 13.957 | 12.533 | 14.912 | 15.110 | 18.068 |
| 24 | 0.3700 | 16.748 | 9.878  | 14.051 | 22.009 | 19.215 |
| 24 | 0.3710 | 14.053 | 9.111  | 16.897 | 24.558 | 21.953 |
| 24 | 0.3720 | 8.991  | 6.782  | 11.487 | 25.907 | 15.533 |

|    |        |        |        |        |        |        |
|----|--------|--------|--------|--------|--------|--------|
| 24 | 0.3730 | 14.452 | 9.967  | 13.501 | 27.289 | 20.313 |
| 24 | 0.3740 | 36.069 | 11.159 | 16.452 | 30.266 | 22.942 |
| 24 | 0.3750 | 13.434 | 9.888  | 11.581 | 21.944 | 22.181 |
| 24 | 0.3760 | 20.767 | 12.340 | 18.531 | 27.696 | 23.882 |
| 24 | 0.3770 | 8.056  | 7.133  | 8.930  | 22.321 | 37.252 |
| 24 | 0.3780 | 13.723 | 9.122  | 9.863  | 12.153 | 33.227 |
| 24 | 0.3790 | 18.866 | 12.666 | 13.662 | 23.831 | 20.335 |
| 24 | 0.3800 | 29.012 | 16.824 | 20.781 | 32.073 | 22.160 |
| 24 | 0.3810 | 25.151 | 26.681 | 21.379 | 35.664 | 24.958 |
| 24 | 0.3820 | 25.113 | 24.532 | 20.682 | 35.817 | 37.306 |
| 24 | 0.3830 | 19.121 | 12.260 | 9.552  | 28.674 | 28.141 |
| 24 | 0.3840 | 21.121 | 12.632 | 11.741 | 28.415 | 27.580 |
| 24 | 0.3850 | 29.114 | 23.730 | 16.335 | 26.207 | 23.185 |
| 24 | 0.3860 | 17.290 | 11.332 | 11.298 | 25.069 | 15.466 |
| 24 | 0.3870 | 19.724 | 16.017 | 19.424 | 31.882 | 32.119 |
| 24 | 0.3880 | 21.035 | 18.388 | 13.452 | 28.639 | 27.526 |
| 24 | 0.3890 | 21.528 | 16.371 | 12.267 | 29.333 | 32.882 |
| 24 | 0.3900 | 18.830 | 20.130 | 12.930 | 24.547 | 29.933 |
| 24 | 0.3910 | 23.275 | 20.711 | 18.809 | 25.086 | 18.438 |
| 24 | 0.3920 | 14.483 | 13.803 | 12.204 | 27.975 | 19.121 |
| 24 | 0.3930 | 14.516 | 17.787 | 10.359 | 30.931 | 28.047 |
| 24 | 0.3940 | 33.010 | 37.874 | 33.616 | 33.735 | 24.804 |
| 24 | 0.3950 | 14.790 | 16.065 | 9.929  | 28.751 | 42.217 |
| 24 | 0.3960 | 36.802 | 27.336 | 30.916 | 19.842 | 35.780 |
| 24 | 0.3970 | 34.583 | 21.015 | 19.643 | 21.967 | 25.800 |
| 24 | 0.3980 | 30.250 | 23.199 | 23.370 | 18.272 | 9.788  |
| 24 | 0.3990 | 19.641 | 16.628 | 17.952 | 16.640 | 18.357 |
| 24 | 0.4000 | 20.990 | 15.630 | 15.937 | 23.111 | 21.303 |
| 24 | 0.4010 | 22.810 | 9.070  | 14.694 | 18.924 | 19.608 |
| 24 | 0.4020 | 19.594 | 16.503 | 20.140 | 15.465 | 23.187 |
| 24 | 0.4030 | 24.431 | 19.466 | 21.487 | 17.676 | 22.143 |
| 24 | 0.4040 | 18.537 | 18.874 | 18.072 | 29.323 | 17.926 |
| 24 | 0.4050 | 10.782 | 12.743 | 9.956  | 24.144 | 14.140 |
| 24 | 0.4060 | 18.522 | 15.928 | 15.491 | 27.461 | 21.804 |
| 24 | 0.4070 | 7.620  | 9.650  | 9.938  | 16.937 | 12.984 |
| 24 | 0.4080 | 14.672 | 6.308  | 9.310  | 15.868 | 19.621 |
| 24 | 0.4090 | 11.664 | 5.845  | 6.256  | 15.976 | 16.179 |
| 24 | 0.4100 | 13.081 | 11.404 | 8.592  | 21.409 | 18.674 |
| 24 | 0.4110 | 12.698 | 7.969  | 11.050 | 12.308 | 21.112 |
| 24 | 0.4120 | 28.319 | 31.624 | 28.650 | 21.530 | 18.755 |
| 24 | 0.4130 | 20.974 | 21.047 | 18.594 | 28.564 | 14.175 |
| 24 | 0.4140 | 10.666 | 5.935  | 5.566  | 23.861 | 10.266 |
| 24 | 0.4150 | 13.964 | 9.782  | 6.345  | 17.216 | 19.947 |
| 24 | 0.4160 | 7.220  | 2.641  | 5.524  | 17.708 | 8.781  |
| 24 | 0.4170 | 7.781  | 2.661  | 5.759  | 31.092 | 10.488 |
| 24 | 0.4180 | 5.564  | 2.965  | 3.594  | 7.283  | 5.694  |
| 24 | 0.4190 | 12.055 | 14.400 | 15.678 | 27.352 | 4.475  |
| 24 | 0.4200 | 20.908 | 21.029 | 18.814 | 17.580 | 5.509  |
| 24 | 0.4210 | 11.552 | 12.889 | 15.383 | 14.018 | 6.738  |
| 24 | 0.4220 | 20.070 | 12.686 | 16.674 | 13.077 | 8.662  |

|    |        |        |        |        |        |        |
|----|--------|--------|--------|--------|--------|--------|
| 24 | 0.4230 | 13.462 | 13.536 | 17.699 | 27.594 | 5.673  |
| 24 | 0.4240 | 29.720 | 14.873 | 27.085 | 28.388 | 14.540 |
| 24 | 0.4250 | 29.190 | 14.806 | 26.700 | 28.175 | 14.499 |
| 24 | 0.4260 | 21.051 | 9.703  | 22.786 | 28.809 | 14.292 |
| 24 | 0.4270 | 11.601 | 5.411  | 11.864 | 17.401 | 8.473  |
| 24 | 0.4280 | 5.716  | 3.127  | 7.515  | 18.753 | 2.901  |
| 24 | 0.4290 | 13.824 | 8.452  | 11.413 | 11.008 | 7.343  |
| 24 | 0.4300 | 4.335  | 4.206  | 2.455  | 5.599  | 4.691  |
| 24 | 0.4310 | 0.973  | 2.408  | 3.148  | 2.889  | 3.117  |
| 24 | 0.4320 | 1.412  | 0.554  | 0.259  | 2.296  | 4.101  |
| 24 | 0.4330 | 8.975  | 6.872  | 8.609  | 4.312  | 7.126  |
| 24 | 0.4340 | 6.766  | 5.913  | 6.360  | 11.180 | 5.756  |
| 24 | 0.4350 | 5.892  | 4.822  | 6.131  | 6.809  | 2.251  |
| 24 | 0.4360 | 9.794  | 10.501 | 8.449  | 12.837 | 12.893 |
| 24 | 0.4370 | 6.275  | 23.307 | 12.050 | 36.865 | 14.034 |
| 24 | 0.4380 | 12.424 | 16.307 | 14.675 | 31.175 | 15.702 |
| 24 | 0.4390 | 8.469  | 23.594 | 12.015 | 35.322 | 10.261 |
| 24 | 0.4400 | 13.652 | 23.646 | 18.304 | 38.735 | 11.712 |
| 24 | 0.4410 | 13.036 | 21.632 | 22.866 | 30.794 | 12.242 |
| 24 | 0.4420 | 12.079 | 17.209 | 20.517 | 36.026 | 12.378 |
| 24 | 0.4430 | 13.582 | 27.001 | 19.594 | 41.275 | 12.533 |
| 24 | 0.4440 | 27.129 | 13.071 | 15.637 | 21.157 | 13.428 |
| 24 | 0.4450 | 16.654 | 8.691  | 12.067 | 22.095 | 10.007 |
| 24 | 0.4460 | 9.817  | 10.621 | 7.167  | 31.376 | 12.293 |
| 24 | 0.4470 | 9.982  | 12.405 | 11.008 | 28.981 | 10.732 |
| 24 | 0.4480 | 10.266 | 8.490  | 12.159 | 16.887 | 11.301 |
| 24 | 0.4490 | 8.994  | 10.422 | 6.766  | 13.591 | 9.790  |
| 24 | 0.4500 | 16.485 | 18.408 | 20.204 | 14.725 | 10.971 |
| 24 | 0.4510 | 23.137 | 30.496 | 27.523 | 28.320 | 10.665 |
| 24 | 0.4520 | 17.991 | 20.098 | 15.290 | 35.670 | 7.304  |
| 24 | 0.4530 | 7.682  | 9.450  | 12.664 | 27.157 | 10.619 |
| 24 | 0.4540 | 11.038 | 19.766 | 13.329 | 34.541 | 11.573 |
| 24 | 0.4550 | 10.778 | 17.799 | 15.356 | 27.402 | 12.030 |
| 24 | 0.4560 | 11.607 | 13.912 | 9.758  | 18.536 | 9.927  |
| 24 | 0.4570 | 17.137 | 13.868 | 14.783 | 17.939 | 8.644  |
| 24 | 0.4580 | 18.382 | 13.420 | 21.097 | 12.104 | 10.825 |
| 24 | 0.4590 | 22.056 | 19.550 | 24.962 | 18.854 | 12.703 |
| 24 | 0.4600 | 9.148  | 11.807 | 8.683  | 18.814 | 10.424 |
| 24 | 0.4610 | 15.656 | 25.652 | 17.067 | 27.986 | 16.960 |
| 24 | 0.4620 | 16.550 | 29.573 | 17.337 | 19.713 | 19.165 |
| 24 | 0.4630 | 14.556 | 18.039 | 16.708 | 33.916 | 18.488 |
| 24 | 0.4640 | 9.702  | 11.460 | 9.859  | 13.062 | 7.902  |
| 24 | 0.4650 | 10.908 | 10.102 | 10.423 | 12.619 | 9.445  |
| 24 | 0.4660 | 20.442 | 21.707 | 25.189 | 15.697 | 12.581 |
| 24 | 0.4670 | 8.476  | 12.473 | 5.989  | 23.836 | 13.285 |
| 24 | 0.4680 | 16.621 | 19.572 | 14.370 | 24.045 | 19.964 |
| 24 | 0.4690 | 22.445 | 22.506 | 22.975 | 21.974 | 6.551  |
| 24 | 0.4700 | 9.183  | 14.036 | 12.442 | 13.128 | 10.950 |
| 24 | 0.4710 | 7.929  | 9.482  | 5.119  | 22.335 | 18.748 |
| 24 | 0.4720 | 12.088 | 9.507  | 13.413 | 7.450  | 10.874 |

|    |        |        |        |        |        |        |
|----|--------|--------|--------|--------|--------|--------|
| 24 | 0.4730 | 20.785 | 19.082 | 18.533 | 17.610 | 10.858 |
| 24 | 0.4740 | 17.280 | 26.442 | 19.896 | 23.103 | 5.087  |
| 24 | 0.4750 | 16.246 | 12.570 | 15.612 | 8.983  | 3.971  |
| 24 | 0.4760 | 20.734 | 16.633 | 15.226 | 12.922 | 9.251  |
| 24 | 0.4770 | 21.336 | 18.955 | 16.519 | 19.978 | 13.413 |
| 24 | 0.4780 | 22.550 | 30.313 | 24.520 | 21.252 | 10.856 |
| 24 | 0.4790 | 15.793 | 24.191 | 19.618 | 23.173 | 9.772  |
| 24 | 0.4800 | 20.587 | 18.833 | 18.731 | 22.265 | 8.989  |
| 24 | 0.4810 | 20.613 | 21.508 | 20.239 | 19.193 | 11.193 |
| 24 | 0.4820 | 26.000 | 27.977 | 24.250 | 18.692 | 7.640  |
| 24 | 0.4830 | 14.665 | 18.609 | 19.305 | 16.090 | 7.588  |
| 24 | 0.4840 | 25.074 | 17.643 | 29.450 | 22.906 | 12.163 |
| 24 | 0.4850 | 16.459 | 22.831 | 15.922 | 37.659 | 7.090  |
| 24 | 0.4860 | 19.537 | 22.271 | 16.184 | 19.147 | 4.757  |
| 24 | 0.4870 | 21.341 | 28.279 | 23.247 | 26.690 | 11.303 |
| 24 | 0.4880 | 10.261 | 15.457 | 9.772  | 18.753 | 7.780  |
| 24 | 0.4890 | 4.126  | 8.593  | 5.477  | 15.772 | 5.624  |
| 24 | 0.4900 | 11.374 | 14.026 | 14.366 | 17.384 | 5.501  |
| 24 | 0.4910 | 16.907 | 21.389 | 19.434 | 20.445 | 5.604  |
| 24 | 0.4920 | 11.624 | 20.883 | 14.028 | 30.863 | 6.975  |
| 24 | 0.4930 | 15.491 | 21.550 | 18.035 | 26.428 | 12.498 |
| 24 | 0.4940 | 15.895 | 18.482 | 14.089 | 33.099 | 5.453  |
| 24 | 0.4950 | 13.242 | 18.547 | 12.253 | 27.700 | 8.030  |
| 24 | 0.4960 | 22.040 | 22.900 | 15.141 | 19.189 | 14.262 |
| 24 | 0.4970 | 13.250 | 13.752 | 11.817 | 11.596 | 4.891  |
| 24 | 0.4980 | 13.283 | 20.000 | 16.677 | 19.835 | 6.283  |
| 24 | 0.4990 | 24.259 | 29.540 | 24.734 | 20.516 | 11.188 |
| 24 | 0.5000 | 23.799 | 18.920 | 18.309 | 19.252 | 15.172 |
| 24 | 0.5010 | 16.188 | 16.600 | 14.106 | 22.665 | 17.311 |
| 24 | 0.5020 | 14.902 | 21.560 | 12.901 | 25.607 | 16.268 |
| 24 | 0.5030 | 17.281 | 25.199 | 18.978 | 29.809 | 18.041 |
| 24 | 0.5040 | 22.029 | 20.171 | 21.492 | 28.361 | 15.212 |
| 24 | 0.5050 | 19.275 | 18.534 | 16.493 | 25.591 | 8.596  |
| 24 | 0.5060 | 7.572  | 11.034 | 11.996 | 21.824 | 10.133 |
| 24 | 0.5070 | 11.510 | 15.442 | 10.022 | 21.279 | 15.999 |
| 24 | 0.5080 | 25.044 | 24.239 | 16.635 | 14.709 | 17.490 |
| 24 | 0.5090 | 23.606 | 22.360 | 17.356 | 20.488 | 12.219 |
| 24 | 0.5100 | 33.560 | 32.509 | 34.796 | 27.773 | 19.481 |
| 24 | 0.5110 | 34.066 | 22.695 | 30.938 | 18.725 | 26.175 |
| 24 | 0.5120 | 13.465 | 11.382 | 14.527 | 14.511 | 21.656 |
| 24 | 0.5130 | 27.521 | 15.723 | 16.429 | 27.744 | 28.239 |
| 24 | 0.5140 | 21.582 | 22.565 | 20.977 | 28.440 | 9.868  |
| 24 | 0.5150 | 14.568 | 14.568 | 12.485 | 12.994 | 8.256  |
| 24 | 0.5160 | 14.613 | 8.949  | 8.855  | 7.571  | 10.850 |
| 24 | 0.5170 | 10.639 | 14.369 | 7.411  | 17.996 | 16.778 |
| 24 | 0.5180 | 21.446 | 15.387 | 19.572 | 15.555 | 18.521 |
| 24 | 0.5190 | 15.794 | 21.802 | 15.192 | 18.641 | 17.930 |
| 24 | 0.5200 | 18.172 | 21.233 | 19.930 | 11.847 | 14.377 |
| 24 | 0.5210 | 26.394 | 25.895 | 27.658 | 14.068 | 14.346 |
| 24 | 0.5220 | 10.694 | 15.282 | 15.456 | 14.504 | 8.339  |

|    |        |        |        |        |        |        |
|----|--------|--------|--------|--------|--------|--------|
| 24 | 0.5230 | 16.515 | 18.210 | 21.629 | 13.700 | 9.086  |
| 24 | 0.5240 | 26.686 | 29.532 | 31.956 | 13.632 | 17.926 |
| 24 | 0.5250 | 21.257 | 26.004 | 21.341 | 11.462 | 16.610 |
| 24 | 0.5260 | 11.890 | 16.217 | 16.866 | 16.691 | 8.465  |
| 24 | 0.5270 | 16.246 | 18.416 | 19.813 | 21.925 | 13.454 |
| 24 | 0.5280 | 20.309 | 21.321 | 25.166 | 13.177 | 16.905 |
| 24 | 0.5290 | 12.868 | 13.246 | 18.329 | 25.956 | 18.695 |
| 24 | 0.5300 | 19.114 | 21.464 | 29.203 | 23.651 | 19.186 |
| 24 | 0.5310 | 17.395 | 16.208 | 16.364 | 10.536 | 22.369 |
| 24 | 0.5320 | 15.157 | 11.346 | 16.295 | 9.313  | 13.282 |
| 24 | 0.5330 | 24.429 | 17.077 | 22.032 | 19.785 | 18.324 |
| 24 | 0.5340 | 15.289 | 20.218 | 17.870 | 14.703 | 10.460 |
| 24 | 0.5350 | 15.582 | 20.387 | 18.382 | 13.680 | 10.559 |
| 24 | 0.5360 | 20.874 | 18.305 | 21.776 | 8.871  | 28.977 |
| 24 | 0.5370 | 24.993 | 15.092 | 16.756 | 9.008  | 23.462 |
| 24 | 0.5380 | 25.016 | 15.112 | 16.806 | 8.971  | 23.499 |
| 24 | 0.5390 | 27.791 | 17.468 | 22.330 | 8.743  | 12.370 |
| 24 | 0.5400 | 13.214 | 11.723 | 15.781 | 14.600 | 14.364 |
| 24 | 0.5410 | 23.424 | 16.052 | 29.341 | 14.194 | 18.752 |
| 24 | 0.5420 | 13.836 | 12.194 | 18.078 | 10.346 | 10.335 |
| 24 | 0.5430 | 28.697 | 20.407 | 29.201 | 13.075 | 20.310 |
| 24 | 0.5440 | 22.837 | 12.917 | 24.444 | 14.435 | 26.328 |
| 24 | 0.5450 | 10.670 | 14.046 | 17.612 | 7.463  | 21.057 |
| 24 | 0.5460 | 18.051 | 8.974  | 18.931 | 12.409 | 12.056 |
| 24 | 0.5470 | 18.637 | 11.744 | 21.416 | 11.081 | 7.051  |
| 24 | 0.5480 | 20.994 | 10.854 | 23.577 | 13.825 | 12.653 |
| 24 | 0.5490 | 14.267 | 10.009 | 18.076 | 7.987  | 10.270 |
| 24 | 0.5500 | 29.887 | 19.183 | 32.239 | 12.596 | 10.216 |
| 24 | 0.5510 | 28.508 | 20.662 | 38.443 | 9.874  | 16.077 |
| 24 | 0.5520 | 17.706 | 14.439 | 29.202 | 10.912 | 15.854 |
| 24 | 0.5530 | 23.565 | 15.120 | 24.715 | 15.707 | 19.408 |
| 24 | 0.5540 | 17.950 | 19.408 | 19.855 | 8.950  | 9.832  |
| 24 | 0.5550 | 23.751 | 13.709 | 18.988 | 9.085  | 17.999 |
| 24 | 0.5560 | 13.413 | 14.645 | 11.948 | 15.982 | 21.430 |
| 24 | 0.5570 | 19.475 | 7.648  | 14.215 | 21.551 | 11.187 |
| 24 | 0.5580 | 17.958 | 16.091 | 19.516 | 12.876 | 18.893 |
| 24 | 0.5590 | 32.261 | 22.753 | 28.519 | 8.275  | 16.629 |
| 24 | 0.5600 | 18.829 | 8.694  | 19.703 | 10.360 | 9.958  |
| 24 | 0.5610 | 17.533 | 6.663  | 12.728 | 11.123 | 9.704  |
| 24 | 0.5620 | 14.325 | 16.329 | 17.177 | 13.408 | 17.537 |
| 24 | 0.5630 | 11.928 | 19.727 | 18.724 | 22.111 | 14.189 |
| 24 | 0.5640 | 19.509 | 12.355 | 15.312 | 5.342  | 19.809 |
| 24 | 0.5650 | 29.667 | 18.797 | 19.918 | 22.437 | 20.383 |
| 24 | 0.5660 | 20.596 | 22.591 | 16.782 | 23.765 | 21.095 |
| 24 | 0.5670 | 18.629 | 11.674 | 15.798 | 19.397 | 27.401 |
| 24 | 0.5680 | 18.819 | 18.797 | 16.757 | 15.980 | 20.300 |
| 24 | 0.5690 | 11.057 | 11.982 | 20.990 | 15.198 | 17.248 |
| 24 | 0.5700 | 17.045 | 14.356 | 20.691 | 24.247 | 18.076 |
| 24 | 0.5710 | 28.264 | 22.650 | 25.543 | 14.939 | 28.149 |
| 24 | 0.5720 | 7.576  | 13.955 | 13.861 | 14.826 | 23.856 |



|    |        |        |        |        |        |        |
|----|--------|--------|--------|--------|--------|--------|
| 24 | 0.5730 | 6.250  | 4.520  | 7.757  | 14.699 | 14.204 |
| 24 | 0.5740 | 12.847 | 18.561 | 16.851 | 14.954 | 17.016 |
| 24 | 0.5750 | 12.261 | 15.917 | 21.584 | 13.853 | 13.849 |
| 24 | 0.5760 | 10.856 | 15.640 | 21.291 | 13.758 | 11.291 |
| 24 | 0.5770 | 19.998 | 11.040 | 25.094 | 16.832 | 19.116 |
| 24 | 0.5780 | 15.260 | 11.075 | 18.305 | 17.991 | 18.050 |
| 24 | 0.5790 | 16.022 | 23.342 | 23.421 | 13.549 | 18.967 |
| 24 | 0.5800 | 25.594 | 19.085 | 24.917 | 20.134 | 20.526 |
| 24 | 0.5810 | 27.243 | 25.310 | 27.406 | 24.984 | 28.370 |
| 24 | 0.5820 | 35.600 | 30.846 | 29.640 | 12.831 | 27.426 |
| 24 | 0.5830 | 20.678 | 23.485 | 17.424 | 14.361 | 13.259 |
| 24 | 0.5840 | 31.519 | 29.457 | 28.795 | 21.654 | 21.215 |
| 24 | 0.5850 | 26.464 | 18.447 | 25.259 | 13.490 | 18.663 |
| 24 | 0.5860 | 16.045 | 12.130 | 16.294 | 20.243 | 19.807 |
| 24 | 0.5870 | 12.593 | 11.244 | 19.526 | 16.068 | 24.310 |
| 24 | 0.5880 | 24.082 | 21.674 | 24.435 | 17.324 | 35.088 |
| 24 | 0.5890 | 15.043 | 14.236 | 16.720 | 14.758 | 24.591 |
| 24 | 0.5900 | 13.026 | 10.358 | 13.787 | 12.910 | 23.970 |
| 24 | 0.5910 | 32.252 | 21.796 | 35.406 | 13.228 | 26.442 |
| 24 | 0.5920 | 21.222 | 8.514  | 21.259 | 10.194 | 17.522 |
| 24 | 0.5930 | 25.336 | 9.578  | 18.804 | 18.066 | 13.396 |
| 24 | 0.5940 | 18.431 | 19.686 | 19.165 | 24.619 | 21.617 |
| 24 | 0.5950 | 15.992 | 25.288 | 19.877 | 23.060 | 6.607  |
| 24 | 0.5960 | 19.537 | 22.588 | 24.817 | 21.599 | 17.719 |
| 24 | 0.5970 | 16.225 | 20.276 | 24.620 | 15.305 | 15.909 |
| 24 | 0.5980 | 19.227 | 11.164 | 19.985 | 11.659 | 15.999 |
| 24 | 0.5990 | 23.972 | 21.043 | 35.614 | 15.932 | 14.253 |
| 24 | 0.6000 | 21.297 | 24.877 | 29.887 | 21.764 | 16.011 |
| 24 | 0.6010 | 14.906 | 21.108 | 17.903 | 14.691 | 16.107 |
| 24 | 0.6020 | 23.554 | 13.267 | 24.368 | 21.171 | 14.868 |
| 24 | 0.6030 | 30.246 | 21.439 | 27.553 | 23.969 | 20.495 |
| 24 | 0.6040 | 26.783 | 16.021 | 23.162 | 14.566 | 11.620 |
| 24 | 0.6050 | 21.941 | 17.669 | 25.227 | 13.232 | 23.243 |
| 24 | 0.6060 | 12.996 | 9.080  | 9.433  | 4.878  | 7.770  |
| 24 | 0.6070 | 10.384 | 6.152  | 5.754  | 6.572  | 3.893  |
| 24 | 0.6080 | 9.870  | 4.768  | 7.070  | 5.835  | 4.273  |
| 24 | 0.6090 | 11.764 | 15.788 | 14.291 | 16.857 | 17.060 |
| 24 | 0.6100 | 14.718 | 10.797 | 17.413 | 15.570 | 14.466 |
| 24 | 0.6110 | 16.019 | 12.505 | 14.978 | 11.337 | 14.199 |
| 24 | 0.6120 | 11.236 | 14.683 | 17.654 | 19.294 | 14.371 |
| 24 | 0.6130 | 11.980 | 17.463 | 19.896 | 16.377 | 11.174 |
| 24 | 0.6140 | 12.237 | 5.988  | 11.108 | 15.888 | 21.849 |
| 24 | 0.6150 | 7.406  | 13.778 | 18.305 | 13.598 | 21.779 |
| 24 | 0.6160 | 0.883  | 0.993  | 1.043  | 1.168  | 1.314  |
| 24 | 0.6170 | 0.000  | 0.000  | 0.000  | 0.000  | 0.000  |
| 25 | 0.0008 | 0.000  | 0.000  | 0.000  | 0.000  | 0.000  |
| 25 | 0.0018 | 12.861 | 7.505  | 12.348 | 15.620 | 16.776 |
| 25 | 0.0028 | 7.121  | 8.740  | 11.970 | 4.878  | 20.293 |
| 25 | 0.0038 | 7.623  | 14.465 | 11.880 | 12.244 | 29.155 |
| 25 | 0.0048 | 8.968  | 14.034 | 15.156 | 20.245 | 23.101 |

|    |        |        |        |        |        |        |
|----|--------|--------|--------|--------|--------|--------|
| 25 | 0.0058 | 18.029 | 19.554 | 21.667 | 10.121 | 20.808 |
| 25 | 0.0068 | 11.904 | 15.486 | 15.273 | 13.613 | 14.617 |
| 25 | 0.0078 | 19.368 | 19.018 | 25.290 | 9.756  | 18.856 |
| 25 | 0.0088 | 18.772 | 20.364 | 18.140 | 11.516 | 11.166 |
| 25 | 0.0098 | 17.129 | 11.596 | 18.629 | 12.564 | 13.764 |
| 25 | 0.0108 | 16.828 | 13.127 | 18.620 | 22.154 | 25.903 |
| 25 | 0.0118 | 10.586 | 11.572 | 20.763 | 16.929 | 22.240 |
| 25 | 0.0128 | 10.949 | 14.520 | 15.212 | 9.642  | 22.695 |
| 25 | 0.0138 | 16.306 | 19.927 | 12.516 | 17.819 | 38.852 |
| 25 | 0.0148 | 6.046  | 6.473  | 9.961  | 9.041  | 17.059 |
| 25 | 0.0158 | 10.769 | 18.232 | 17.194 | 9.005  | 7.049  |
| 25 | 0.0168 | 10.933 | 16.702 | 21.136 | 8.956  | 14.776 |
| 25 | 0.0178 | 19.100 | 22.223 | 28.010 | 12.516 | 22.445 |
| 25 | 0.0188 | 27.544 | 27.435 | 33.244 | 11.083 | 33.173 |
| 25 | 0.0198 | 19.229 | 19.777 | 21.602 | 6.994  | 16.525 |
| 25 | 0.0208 | 8.666  | 11.137 | 16.491 | 11.070 | 16.889 |
| 25 | 0.0218 | 14.516 | 9.208  | 18.467 | 17.853 | 43.327 |
| 25 | 0.0228 | 14.754 | 14.063 | 17.842 | 14.458 | 20.474 |
| 25 | 0.0238 | 14.026 | 21.530 | 23.297 | 15.647 | 21.675 |
| 25 | 0.0248 | 12.614 | 17.534 | 15.395 | 12.697 | 28.042 |
| 25 | 0.0258 | 12.620 | 17.547 | 15.379 | 12.701 | 28.169 |
| 25 | 0.0268 | 10.576 | 14.103 | 20.781 | 7.041  | 30.539 |
| 25 | 0.0278 | 16.550 | 21.925 | 18.348 | 5.995  | 25.370 |
| 25 | 0.0288 | 15.509 | 21.707 | 16.525 | 23.133 | 17.139 |
| 25 | 0.0298 | 9.377  | 13.275 | 16.604 | 18.700 | 21.700 |
| 25 | 0.0308 | 8.106  | 8.732  | 8.374  | 10.628 | 12.624 |
| 25 | 0.0318 | 6.238  | 5.919  | 6.252  | 7.254  | 10.270 |
| 25 | 0.0328 | 5.146  | 2.263  | 2.562  | 12.830 | 12.584 |
| 25 | 0.0338 | 10.610 | 16.221 | 14.189 | 14.248 | 19.064 |
| 25 | 0.0348 | 12.745 | 11.526 | 9.029  | 11.544 | 34.203 |
| 25 | 0.0358 | 15.127 | 7.677  | 8.664  | 10.944 | 30.001 |
| 25 | 0.0368 | 5.850  | 3.976  | 5.860  | 15.806 | 23.778 |
| 25 | 0.0378 | 14.201 | 9.580  | 19.590 | 14.566 | 23.384 |
| 25 | 0.0388 | 10.913 | 12.477 | 19.527 | 13.023 | 32.110 |
| 25 | 0.0398 | 9.455  | 6.912  | 10.122 | 14.936 | 27.698 |
| 25 | 0.0408 | 8.720  | 2.698  | 10.892 | 18.370 | 15.523 |
| 25 | 0.0418 | 8.477  | 8.839  | 17.019 | 10.708 | 17.047 |
| 25 | 0.0428 | 14.371 | 9.930  | 19.784 | 12.344 | 22.910 |
| 25 | 0.0438 | 10.263 | 10.963 | 4.875  | 22.693 | 21.171 |
| 25 | 0.0448 | 10.193 | 10.818 | 4.861  | 22.792 | 21.140 |
| 25 | 0.0458 | 9.590  | 8.750  | 8.130  | 22.468 | 21.321 |
| 25 | 0.0468 | 13.953 | 12.261 | 16.705 | 19.878 | 16.324 |
| 25 | 0.0478 | 15.018 | 8.845  | 11.021 | 22.719 | 21.281 |
| 25 | 0.0488 | 14.773 | 8.932  | 8.296  | 19.458 | 16.235 |
| 25 | 0.0498 | 12.561 | 16.373 | 12.044 | 21.318 | 14.685 |
| 25 | 0.0508 | 23.128 | 15.247 | 18.252 | 21.889 | 20.549 |
| 25 | 0.0518 | 21.020 | 21.342 | 24.234 | 22.961 | 22.061 |
| 25 | 0.0528 | 12.189 | 12.553 | 13.167 | 16.526 | 27.308 |
| 25 | 0.0538 | 18.001 | 12.591 | 15.894 | 14.564 | 15.246 |
| 25 | 0.0548 | 9.889  | 13.417 | 17.792 | 23.146 | 25.121 |

|    |        |        |        |        |        |        |
|----|--------|--------|--------|--------|--------|--------|
| 25 | 0.0558 | 11.116 | 15.289 | 15.948 | 24.808 | 11.054 |
| 25 | 0.0568 | 9.208  | 19.615 | 9.852  | 33.251 | 19.393 |
| 25 | 0.0578 | 9.278  | 15.002 | 10.040 | 15.291 | 12.417 |
| 25 | 0.0588 | 7.086  | 10.452 | 9.204  | 14.264 | 6.301  |
| 25 | 0.0598 | 9.832  | 11.668 | 15.321 | 15.943 | 9.944  |
| 25 | 0.0608 | 12.848 | 15.071 | 15.507 | 19.799 | 21.323 |
| 25 | 0.0618 | 15.437 | 22.079 | 20.306 | 27.781 | 12.913 |
| 25 | 0.0628 | 13.291 | 18.685 | 18.394 | 22.062 | 17.406 |
| 25 | 0.0638 | 15.432 | 10.447 | 15.915 | 24.147 | 20.785 |
| 25 | 0.0648 | 18.604 | 16.889 | 15.442 | 19.189 | 14.126 |
| 25 | 0.0658 | 13.821 | 7.364  | 11.152 | 15.297 | 16.040 |
| 25 | 0.0668 | 12.176 | 20.612 | 18.173 | 26.925 | 27.523 |
| 25 | 0.0678 | 13.643 | 14.230 | 18.466 | 5.680  | 13.646 |
| 25 | 0.0688 | 22.390 | 21.069 | 22.427 | 22.500 | 22.297 |
| 25 | 0.0698 | 13.857 | 19.728 | 19.782 | 24.570 | 24.248 |
| 25 | 0.0708 | 12.342 | 8.783  | 15.909 | 25.459 | 16.218 |
| 25 | 0.0718 | 8.357  | 9.571  | 9.696  | 26.219 | 14.528 |
| 25 | 0.0728 | 11.373 | 5.301  | 10.091 | 14.692 | 15.949 |
| 25 | 0.0738 | 9.662  | 10.033 | 11.822 | 18.096 | 15.014 |
| 25 | 0.0748 | 14.659 | 18.161 | 13.126 | 17.788 | 20.937 |
| 25 | 0.0758 | 22.827 | 18.333 | 19.802 | 13.011 | 21.095 |
| 25 | 0.0768 | 13.739 | 13.464 | 15.075 | 19.800 | 29.224 |
| 25 | 0.0778 | 16.559 | 23.101 | 16.494 | 15.753 | 24.679 |
| 25 | 0.0788 | 9.970  | 12.188 | 5.738  | 14.240 | 8.662  |
| 25 | 0.0798 | 15.979 | 17.081 | 11.448 | 15.013 | 12.755 |
| 25 | 0.0808 | 17.442 | 10.999 | 12.954 | 19.433 | 27.093 |
| 25 | 0.0818 | 8.461  | 14.049 | 16.136 | 18.772 | 16.611 |
| 25 | 0.0828 | 16.472 | 13.901 | 18.970 | 22.710 | 24.653 |
| 25 | 0.0838 | 17.216 | 13.288 | 14.853 | 17.441 | 24.949 |
| 25 | 0.0848 | 16.798 | 13.193 | 14.550 | 17.604 | 24.884 |
| 25 | 0.0858 | 15.908 | 17.716 | 15.237 | 15.866 | 17.605 |
| 25 | 0.0868 | 11.615 | 10.017 | 11.668 | 13.380 | 18.087 |
| 25 | 0.0878 | 8.762  | 11.891 | 11.493 | 21.971 | 17.013 |
| 25 | 0.0888 | 11.554 | 7.367  | 8.728  | 25.890 | 14.955 |
| 25 | 0.0898 | 13.080 | 6.788  | 6.008  | 19.041 | 27.172 |
| 25 | 0.0908 | 9.020  | 9.141  | 7.526  | 18.481 | 14.996 |
| 25 | 0.0918 | 15.783 | 21.520 | 24.566 | 17.326 | 18.965 |
| 25 | 0.0928 | 18.600 | 27.836 | 30.595 | 15.185 | 20.922 |
| 25 | 0.0938 | 17.644 | 22.059 | 21.152 | 26.357 | 17.098 |
| 25 | 0.0948 | 13.431 | 17.689 | 12.171 | 14.604 | 13.266 |
| 25 | 0.0958 | 5.758  | 4.475  | 7.010  | 21.440 | 25.178 |
| 25 | 0.0968 | 17.376 | 14.545 | 22.577 | 18.903 | 29.983 |
| 25 | 0.0978 | 16.628 | 28.150 | 30.053 | 18.399 | 25.941 |
| 25 | 0.0988 | 27.946 | 21.696 | 29.337 | 12.273 | 18.536 |
| 25 | 0.0998 | 9.479  | 12.241 | 10.421 | 24.033 | 19.926 |
| 25 | 0.1008 | 5.392  | 10.288 | 6.971  | 28.910 | 26.524 |
| 25 | 0.1018 | 13.710 | 14.754 | 18.692 | 28.472 | 33.709 |
| 25 | 0.1028 | 15.165 | 17.116 | 19.978 | 9.535  | 29.295 |
| 25 | 0.1038 | 19.041 | 22.459 | 22.895 | 17.655 | 24.167 |
| 25 | 0.1048 | 15.693 | 12.795 | 14.464 | 21.451 | 12.388 |

|    |        |        |        |        |        |        |
|----|--------|--------|--------|--------|--------|--------|
| 25 | 0.1058 | 13.468 | 8.990  | 10.520 | 23.743 | 25.862 |
| 25 | 0.1068 | 8.100  | 6.130  | 3.214  | 19.518 | 16.691 |
| 25 | 0.1078 | 8.044  | 5.951  | 3.139  | 19.391 | 16.670 |
| 25 | 0.1088 | 14.564 | 9.917  | 10.231 | 11.651 | 17.040 |
| 25 | 0.1098 | 23.002 | 18.942 | 24.162 | 13.930 | 27.086 |
| 25 | 0.1108 | 26.355 | 19.880 | 22.009 | 14.398 | 22.520 |
| 25 | 0.1118 | 8.482  | 7.433  | 5.583  | 21.643 | 18.658 |
| 25 | 0.1128 | 20.432 | 15.230 | 17.713 | 9.784  | 16.218 |
| 25 | 0.1138 | 19.348 | 13.114 | 16.516 | 13.907 | 16.356 |
| 25 | 0.1148 | 18.319 | 15.924 | 19.731 | 9.792  | 18.612 |
| 25 | 0.1158 | 35.036 | 38.851 | 48.482 | 12.183 | 24.864 |
| 25 | 0.1168 | 25.663 | 25.582 | 26.546 | 16.897 | 20.140 |
| 25 | 0.1178 | 8.997  | 13.076 | 10.325 | 15.401 | 14.387 |
| 25 | 0.1188 | 20.990 | 24.787 | 22.057 | 15.292 | 8.952  |
| 25 | 0.1198 | 16.105 | 11.184 | 12.649 | 9.911  | 14.310 |
| 25 | 0.1208 | 11.136 | 9.545  | 8.730  | 11.049 | 18.574 |
| 25 | 0.1218 | 10.811 | 13.614 | 10.329 | 13.120 | 31.527 |
| 25 | 0.1228 | 10.416 | 10.905 | 6.817  | 18.644 | 27.776 |
| 25 | 0.1238 | 13.199 | 12.799 | 17.648 | 22.670 | 25.346 |
| 25 | 0.1248 | 13.297 | 13.609 | 13.742 | 28.272 | 36.891 |
| 25 | 0.1258 | 12.572 | 12.644 | 10.841 | 18.044 | 16.611 |
| 25 | 0.1268 | 18.671 | 18.574 | 16.177 | 19.284 | 17.379 |
| 25 | 0.1278 | 17.018 | 17.880 | 16.165 | 24.074 | 23.985 |
| 25 | 0.1288 | 11.758 | 15.258 | 9.015  | 14.729 | 21.142 |
| 25 | 0.1298 | 13.022 | 9.421  | 9.461  | 8.745  | 18.217 |
| 25 | 0.1308 | 7.991  | 6.793  | 6.689  | 4.825  | 10.514 |
| 25 | 0.1318 | 3.878  | 2.036  | 2.651  | 6.194  | 11.121 |
| 25 | 0.1328 | 6.776  | 5.773  | 4.032  | 16.357 | 6.929  |
| 25 | 0.1338 | 26.172 | 18.834 | 25.327 | 27.635 | 25.357 |
| 25 | 0.1348 | 21.805 | 24.120 | 18.424 | 16.293 | 18.002 |
| 25 | 0.1358 | 7.488  | 12.655 | 5.901  | 17.716 | 15.410 |
| 25 | 0.1368 | 7.789  | 9.833  | 3.320  | 22.870 | 16.077 |
| 25 | 0.1378 | 14.108 | 11.703 | 6.488  | 14.299 | 11.582 |
| 25 | 0.1388 | 12.700 | 11.469 | 10.906 | 18.747 | 18.226 |
| 25 | 0.1398 | 22.061 | 26.800 | 21.608 | 29.552 | 18.882 |
| 25 | 0.1408 | 12.977 | 14.477 | 12.507 | 14.198 | 21.427 |
| 25 | 0.1418 | 14.746 | 14.086 | 14.455 | 25.643 | 21.116 |
| 25 | 0.1428 | 7.395  | 12.815 | 9.761  | 22.960 | 23.260 |
| 25 | 0.1438 | 7.304  | 12.762 | 9.729  | 22.994 | 23.253 |
| 25 | 0.1448 | 9.853  | 12.034 | 11.587 | 24.783 | 26.915 |
| 25 | 0.1458 | 15.964 | 11.254 | 13.021 | 24.283 | 11.121 |
| 25 | 0.1468 | 11.701 | 14.570 | 11.492 | 21.630 | 17.428 |
| 25 | 0.1478 | 23.011 | 18.661 | 16.007 | 33.180 | 27.402 |
| 25 | 0.1488 | 22.972 | 18.596 | 15.992 | 33.389 | 27.251 |
| 25 | 0.1498 | 25.827 | 24.088 | 17.729 | 30.386 | 18.924 |
| 25 | 0.1508 | 23.245 | 17.107 | 17.064 | 19.508 | 17.912 |
| 25 | 0.1518 | 23.557 | 23.962 | 18.407 | 29.989 | 22.242 |
| 25 | 0.1528 | 21.528 | 17.838 | 20.245 | 30.256 | 14.876 |
| 25 | 0.1538 | 17.299 | 20.453 | 13.922 | 50.355 | 17.990 |
| 25 | 0.1548 | 11.902 | 11.316 | 8.389  | 12.501 | 10.467 |

|    |        |        |        |        |        |        |
|----|--------|--------|--------|--------|--------|--------|
| 25 | 0.1558 | 10.711 | 8.763  | 9.427  | 21.888 | 8.680  |
| 25 | 0.1568 | 8.266  | 5.803  | 7.560  | 31.543 | 17.985 |
| 25 | 0.1578 | 13.627 | 3.548  | 10.623 | 31.538 | 12.317 |
| 25 | 0.1588 | 6.986  | 4.022  | 6.529  | 25.148 | 13.227 |
| 25 | 0.1598 | 19.277 | 13.706 | 15.301 | 35.632 | 20.151 |
| 25 | 0.1608 | 17.334 | 20.103 | 15.622 | 31.713 | 12.522 |
| 25 | 0.1618 | 15.048 | 18.443 | 12.962 | 21.013 | 20.109 |
| 25 | 0.1628 | 14.479 | 11.400 | 13.344 | 17.003 | 6.899  |
| 25 | 0.1638 | 22.695 | 21.073 | 17.773 | 27.505 | 15.681 |
| 25 | 0.1648 | 12.771 | 8.775  | 7.594  | 19.884 | 10.346 |
| 25 | 0.1658 | 12.098 | 10.166 | 8.334  | 23.628 | 7.416  |
| 25 | 0.1668 | 23.066 | 14.803 | 23.409 | 20.682 | 7.917  |
| 25 | 0.1678 | 25.049 | 18.851 | 12.840 | 22.567 | 15.494 |
| 25 | 0.1688 | 28.097 | 21.477 | 14.226 | 26.538 | 14.885 |
| 25 | 0.1698 | 15.637 | 14.034 | 15.971 | 16.731 | 13.955 |
| 25 | 0.1708 | 20.912 | 14.708 | 13.885 | 29.656 | 13.505 |
| 25 | 0.1718 | 9.728  | 6.627  | 5.260  | 20.269 | 12.835 |
| 25 | 0.1728 | 8.285  | 7.292  | 3.128  | 18.832 | 21.360 |
| 25 | 0.1738 | 7.207  | 9.180  | 6.179  | 20.276 | 6.433  |
| 25 | 0.1748 | 6.452  | 10.183 | 4.517  | 25.769 | 18.587 |
| 25 | 0.1758 | 2.251  | 9.434  | 1.739  | 45.347 | 17.411 |
| 25 | 0.1768 | 13.652 | 11.730 | 10.820 | 29.844 | 8.997  |
| 25 | 0.1778 | 15.500 | 12.779 | 15.157 | 22.073 | 6.119  |
| 25 | 0.1788 | 21.529 | 24.293 | 15.976 | 16.769 | 16.229 |
| 25 | 0.1798 | 16.936 | 10.270 | 11.321 | 15.410 | 12.304 |
| 25 | 0.1808 | 13.173 | 5.016  | 9.511  | 17.099 | 9.120  |
| 25 | 0.1818 | 9.507  | 3.633  | 5.672  | 22.567 | 3.920  |
| 25 | 0.1828 | 14.551 | 10.559 | 12.777 | 24.133 | 7.095  |
| 25 | 0.1838 | 10.329 | 9.660  | 12.180 | 23.535 | 10.911 |
| 25 | 0.1848 | 20.935 | 25.105 | 19.526 | 36.944 | 16.836 |
| 25 | 0.1858 | 5.028  | 7.628  | 4.321  | 26.567 | 9.834  |
| 25 | 0.1868 | 10.084 | 8.166  | 4.495  | 12.296 | 6.472  |
| 25 | 0.1878 | 4.893  | 9.399  | 5.333  | 19.361 | 18.751 |
| 25 | 0.1888 | 4.698  | 7.316  | 9.096  | 11.239 | 14.848 |
| 25 | 0.1898 | 4.703  | 7.306  | 9.114  | 11.230 | 14.858 |
| 25 | 0.1908 | 4.680  | 8.005  | 5.107  | 26.053 | 18.805 |
| 25 | 0.1918 | 4.661  | 7.958  | 5.125  | 26.014 | 18.817 |
| 25 | 0.1928 | 3.148  | 5.430  | 1.307  | 22.677 | 11.290 |
| 25 | 0.1938 | 8.540  | 9.056  | 8.581  | 20.559 | 14.085 |
| 25 | 0.1948 | 12.697 | 8.335  | 6.527  | 10.680 | 7.711  |
| 25 | 0.1958 | 16.557 | 3.635  | 10.121 | 18.704 | 15.084 |
| 25 | 0.1968 | 12.721 | 7.318  | 8.840  | 24.329 | 22.189 |
| 25 | 0.1978 | 12.742 | 7.277  | 8.834  | 24.322 | 22.339 |
| 25 | 0.1988 | 15.312 | 13.371 | 12.757 | 20.077 | 16.843 |
| 25 | 0.1998 | 9.313  | 6.252  | 8.242  | 11.223 | 18.094 |
| 25 | 0.2008 | 9.650  | 12.546 | 9.494  | 23.257 | 14.638 |
| 25 | 0.2018 | 6.442  | 8.819  | 10.455 | 15.084 | 8.984  |
| 25 | 0.2028 | 13.784 | 12.053 | 11.530 | 16.481 | 7.877  |
| 25 | 0.2038 | 13.409 | 9.907  | 10.282 | 17.957 | 5.985  |
| 25 | 0.2048 | 22.024 | 12.077 | 14.394 | 29.101 | 17.045 |

|    |        |        |        |        |        |        |
|----|--------|--------|--------|--------|--------|--------|
| 25 | 0.2058 | 9.914  | 10.165 | 8.154  | 34.282 | 12.781 |
| 25 | 0.2068 | 5.208  | 9.625  | 7.322  | 37.422 | 13.830 |
| 25 | 0.2078 | 5.454  | 14.110 | 6.668  | 22.267 | 11.211 |
| 25 | 0.2088 | 5.958  | 11.094 | 7.238  | 14.954 | 14.458 |
| 25 | 0.2098 | 19.930 | 18.721 | 14.633 | 14.722 | 25.172 |
| 25 | 0.2108 | 20.017 | 18.768 | 14.845 | 14.644 | 25.239 |
| 25 | 0.2118 | 16.335 | 9.642  | 6.403  | 28.242 | 16.797 |
| 25 | 0.2128 | 13.492 | 12.762 | 9.047  | 15.711 | 12.728 |
| 25 | 0.2138 | 12.085 | 11.921 | 5.311  | 23.713 | 17.538 |
| 25 | 0.2148 | 9.544  | 16.592 | 7.854  | 30.338 | 16.097 |
| 25 | 0.2158 | 12.868 | 16.792 | 10.433 | 20.839 | 15.151 |
| 25 | 0.2168 | 6.832  | 11.680 | 8.394  | 21.530 | 10.418 |
| 25 | 0.2178 | 15.142 | 16.872 | 12.966 | 38.018 | 18.535 |
| 25 | 0.2188 | 17.583 | 23.748 | 16.883 | 28.323 | 17.139 |
| 25 | 0.2198 | 13.459 | 21.262 | 14.265 | 27.586 | 12.189 |
| 25 | 0.2208 | 12.824 | 19.841 | 9.421  | 25.305 | 13.486 |
| 25 | 0.2218 | 24.116 | 18.572 | 15.327 | 18.172 | 16.798 |
| 25 | 0.2228 | 13.898 | 10.140 | 5.470  | 7.866  | 6.936  |
| 25 | 0.2238 | 22.338 | 16.145 | 10.128 | 22.341 | 13.439 |
| 25 | 0.2248 | 10.478 | 17.244 | 7.129  | 19.274 | 14.099 |
| 25 | 0.2258 | 8.094  | 16.830 | 8.471  | 24.890 | 13.000 |
| 25 | 0.2268 | 19.703 | 23.242 | 19.296 | 26.286 | 30.524 |
| 25 | 0.2278 | 16.331 | 24.068 | 18.087 | 21.043 | 21.033 |
| 25 | 0.2288 | 8.763  | 15.356 | 8.845  | 23.403 | 9.873  |
| 25 | 0.2298 | 29.198 | 29.769 | 26.296 | 15.271 | 4.856  |
| 25 | 0.2308 | 21.942 | 25.256 | 20.250 | 15.895 | 21.938 |
| 25 | 0.2318 | 17.887 | 17.824 | 18.707 | 24.006 | 10.875 |
| 25 | 0.2328 | 15.400 | 14.964 | 10.229 | 28.186 | 15.682 |
| 25 | 0.2338 | 11.604 | 8.618  | 8.978  | 21.522 | 13.994 |
| 25 | 0.2348 | 13.667 | 18.815 | 19.151 | 17.923 | 22.963 |
| 25 | 0.2358 | 22.725 | 23.893 | 27.825 | 23.543 | 14.114 |
| 25 | 0.2368 | 16.724 | 22.414 | 21.660 | 26.106 | 15.403 |
| 25 | 0.2378 | 18.608 | 18.081 | 17.081 | 24.601 | 12.014 |
| 25 | 0.2388 | 9.231  | 10.949 | 7.537  | 20.204 | 8.939  |
| 25 | 0.2398 | 11.714 | 12.214 | 11.313 | 26.752 | 27.102 |
| 25 | 0.2408 | 12.841 | 21.307 | 17.578 | 24.366 | 23.236 |
| 25 | 0.2418 | 13.761 | 32.461 | 22.516 | 27.159 | 15.354 |
| 25 | 0.2428 | 6.452  | 14.894 | 7.803  | 16.868 | 17.661 |
| 25 | 0.2438 | 2.853  | 9.401  | 6.010  | 12.119 | 3.616  |
| 25 | 0.2448 | 10.081 | 4.335  | 5.439  | 13.043 | 13.827 |
| 25 | 0.2458 | 22.114 | 14.761 | 13.728 | 7.251  | 14.244 |
| 25 | 0.2468 | 9.063  | 9.124  | 9.172  | 13.195 | 15.571 |
| 25 | 0.2478 | 10.557 | 7.705  | 6.335  | 7.907  | 14.726 |
| 25 | 0.2488 | 8.594  | 8.400  | 4.491  | 15.806 | 12.425 |
| 25 | 0.2498 | 11.361 | 9.578  | 10.804 | 20.718 | 21.479 |
| 25 | 0.2508 | 15.219 | 7.395  | 6.605  | 15.567 | 18.944 |
| 25 | 0.2518 | 9.341  | 8.256  | 8.309  | 18.186 | 16.063 |
| 25 | 0.2528 | 10.515 | 16.131 | 9.753  | 18.177 | 19.884 |
| 25 | 0.2538 | 25.810 | 20.749 | 22.143 | 16.054 | 25.692 |
| 25 | 0.2548 | 16.586 | 19.923 | 16.453 | 27.906 | 29.002 |

|    |        |        |        |        |        |        |
|----|--------|--------|--------|--------|--------|--------|
| 25 | 0.2558 | 12.987 | 11.606 | 6.386  | 25.723 | 32.492 |
| 25 | 0.2568 | 13.361 | 11.495 | 11.658 | 10.372 | 15.450 |
| 25 | 0.2578 | 16.422 | 17.792 | 18.209 | 16.106 | 21.755 |
| 25 | 0.2588 | 9.247  | 12.446 | 10.676 | 15.558 | 20.734 |
| 25 | 0.2598 | 16.600 | 17.359 | 10.550 | 13.529 | 13.402 |
| 25 | 0.2608 | 10.026 | 12.620 | 8.071  | 10.274 | 6.802  |
| 25 | 0.2618 | 10.091 | 11.450 | 10.965 | 14.139 | 12.482 |
| 25 | 0.2628 | 12.608 | 8.556  | 8.576  | 10.864 | 19.094 |
| 25 | 0.2638 | 14.969 | 23.135 | 14.725 | 17.037 | 16.021 |
| 25 | 0.2648 | 18.545 | 21.826 | 13.632 | 21.491 | 10.302 |
| 25 | 0.2658 | 7.691  | 17.284 | 7.838  | 16.324 | 15.458 |
| 25 | 0.2668 | 11.478 | 19.698 | 11.742 | 20.433 | 25.029 |
| 25 | 0.2678 | 12.808 | 18.153 | 13.542 | 10.420 | 16.798 |
| 25 | 0.2688 | 7.315  | 6.349  | 4.768  | 9.527  | 19.569 |
| 25 | 0.2698 | 4.354  | 6.044  | 3.251  | 4.108  | 2.998  |
| 25 | 0.2708 | 12.104 | 18.646 | 6.655  | 16.085 | 6.720  |
| 25 | 0.2718 | 6.719  | 12.527 | 5.572  | 12.144 | 5.760  |
| 25 | 0.2728 | 7.772  | 11.937 | 5.329  | 20.572 | 17.474 |
| 25 | 0.2738 | 3.379  | 10.329 | 4.667  | 16.231 | 16.987 |
| 25 | 0.2748 | 11.674 | 14.058 | 13.103 | 12.081 | 13.037 |
| 25 | 0.2758 | 9.443  | 5.293  | 6.248  | 6.867  | 17.331 |
| 25 | 0.2768 | 6.528  | 8.306  | 3.414  | 8.522  | 16.361 |
| 25 | 0.2778 | 8.434  | 13.687 | 5.393  | 15.933 | 20.526 |
| 25 | 0.2788 | 13.154 | 10.078 | 13.004 | 11.051 | 14.787 |
| 25 | 0.2798 | 6.804  | 10.805 | 4.591  | 11.907 | 9.308  |
| 25 | 0.2808 | 7.327  | 21.047 | 11.176 | 24.455 | 7.935  |
| 25 | 0.2818 | 10.972 | 19.908 | 8.339  | 11.126 | 4.550  |
| 25 | 0.2828 | 11.910 | 15.760 | 9.935  | 12.636 | 4.846  |
| 25 | 0.2838 | 13.739 | 23.029 | 13.419 | 16.529 | 7.873  |
| 25 | 0.2848 | 15.483 | 22.293 | 15.826 | 19.928 | 15.051 |
| 25 | 0.2858 | 6.895  | 10.568 | 6.821  | 12.213 | 16.978 |
| 25 | 0.2868 | 11.517 | 14.055 | 9.409  | 8.641  | 24.743 |
| 25 | 0.2878 | 8.048  | 12.178 | 8.797  | 10.419 | 20.810 |
| 25 | 0.2888 | 16.312 | 12.394 | 9.781  | 16.207 | 17.542 |
| 25 | 0.2898 | 8.536  | 9.693  | 7.907  | 14.898 | 24.115 |
| 25 | 0.2908 | 12.164 | 17.824 | 19.029 | 6.159  | 9.201  |
| 25 | 0.2918 | 14.588 | 22.165 | 16.448 | 14.430 | 10.529 |
| 25 | 0.2928 | 14.043 | 19.321 | 15.619 | 19.058 | 15.781 |
| 25 | 0.2938 | 7.993  | 14.496 | 9.824  | 14.016 | 15.615 |
| 25 | 0.2948 | 6.953  | 5.785  | 5.760  | 3.673  | 11.104 |
| 25 | 0.2958 | 7.809  | 18.227 | 9.894  | 10.754 | 7.816  |
| 25 | 0.2968 | 7.862  | 11.320 | 8.843  | 7.525  | 8.906  |
| 25 | 0.2978 | 7.320  | 10.507 | 10.969 | 7.606  | 24.875 |
| 25 | 0.2988 | 7.285  | 10.563 | 10.915 | 7.595  | 24.872 |
| 25 | 0.2998 | 11.687 | 14.802 | 9.098  | 8.653  | 7.974  |
| 25 | 0.3008 | 9.580  | 15.546 | 12.115 | 13.069 | 19.564 |
| 25 | 0.3018 | 5.079  | 2.901  | 6.031  | 10.205 | 8.931  |
| 25 | 0.3028 | 11.192 | 19.814 | 17.292 | 9.700  | 4.938  |
| 25 | 0.3038 | 7.258  | 11.288 | 10.380 | 6.613  | 6.483  |
| 25 | 0.3048 | 4.335  | 4.279  | 3.997  | 6.478  | 13.482 |

|    |        |        |        |        |        |        |
|----|--------|--------|--------|--------|--------|--------|
| 25 | 0.3058 | 7.851  | 5.538  | 6.488  | 3.813  | 4.387  |
| 25 | 0.3068 | 8.634  | 4.790  | 6.497  | 5.293  | 6.238  |
| 25 | 0.3078 | 6.503  | 5.211  | 3.598  | 5.248  | 4.344  |
| 25 | 0.3088 | 6.829  | 8.404  | 9.159  | 2.114  | 6.788  |
| 25 | 0.3098 | 11.173 | 6.806  | 7.436  | 12.032 | 16.695 |
| 25 | 0.3108 | 10.591 | 6.954  | 4.919  | 11.540 | 9.270  |
| 25 | 0.3118 | 7.656  | 12.821 | 7.207  | 7.863  | 10.693 |
| 25 | 0.3128 | 13.751 | 13.056 | 12.238 | 9.931  | 5.763  |
| 25 | 0.3138 | 9.474  | 9.582  | 8.698  | 14.381 | 12.868 |
| 25 | 0.3148 | 9.564  | 9.618  | 8.754  | 14.283 | 12.902 |
| 25 | 0.3158 | 9.832  | 3.720  | 7.329  | 12.605 | 12.217 |
| 25 | 0.3168 | 12.720 | 5.274  | 9.875  | 19.542 | 12.840 |
| 25 | 0.3178 | 8.074  | 7.945  | 8.272  | 11.552 | 10.014 |
| 25 | 0.3188 | 10.972 | 16.244 | 14.114 | 13.545 | 13.063 |
| 25 | 0.3198 | 12.382 | 8.268  | 7.547  | 8.804  | 15.900 |
| 25 | 0.3208 | 8.045  | 9.768  | 8.906  | 11.048 | 4.986  |
| 25 | 0.3218 | 18.202 | 18.390 | 16.948 | 13.693 | 11.544 |
| 25 | 0.3228 | 8.646  | 10.397 | 7.687  | 5.873  | 15.448 |
| 25 | 0.3238 | 6.392  | 9.695  | 4.566  | 13.318 | 10.044 |
| 25 | 0.3248 | 10.342 | 9.790  | 12.156 | 5.549  | 14.130 |
| 25 | 0.3258 | 14.129 | 19.718 | 9.587  | 17.374 | 11.449 |
| 25 | 0.3268 | 5.566  | 5.957  | 5.644  | 11.968 | 12.574 |
| 25 | 0.3278 | 5.619  | 5.949  | 5.627  | 11.795 | 12.316 |
| 25 | 0.3288 | 8.505  | 7.843  | 10.429 | 8.002  | 10.731 |
| 25 | 0.3298 | 13.620 | 9.858  | 10.631 | 10.865 | 9.369  |
| 25 | 0.3308 | 11.607 | 13.469 | 9.330  | 15.681 | 15.107 |
| 25 | 0.3318 | 11.112 | 8.820  | 9.144  | 23.148 | 17.413 |
| 25 | 0.3328 | 25.001 | 21.028 | 20.394 | 11.161 | 14.272 |
| 25 | 0.3338 | 13.035 | 19.253 | 14.621 | 19.886 | 14.765 |
| 25 | 0.3348 | 8.436  | 13.271 | 8.948  | 24.060 | 22.899 |
| 25 | 0.3358 | 11.324 | 11.778 | 10.768 | 9.736  | 26.351 |
| 25 | 0.3368 | 7.826  | 11.739 | 8.803  | 11.374 | 26.032 |
| 25 | 0.3378 | 6.992  | 1.841  | 2.701  | 8.256  | 23.482 |
| 25 | 0.3388 | 8.027  | 9.504  | 7.042  | 9.685  | 9.456  |
| 25 | 0.3398 | 7.911  | 10.821 | 7.093  | 10.877 | 12.198 |
| 25 | 0.3408 | 6.365  | 15.818 | 9.715  | 16.600 | 21.839 |
| 25 | 0.3418 | 8.596  | 17.888 | 11.886 | 32.202 | 17.480 |
| 25 | 0.3428 | 8.607  | 17.734 | 11.796 | 32.126 | 17.339 |
| 25 | 0.3438 | 9.708  | 8.447  | 9.651  | 12.564 | 11.352 |
| 25 | 0.3448 | 11.341 | 18.759 | 12.665 | 15.878 | 18.211 |
| 25 | 0.3458 | 8.855  | 13.838 | 10.522 | 21.864 | 21.894 |
| 25 | 0.3468 | 14.415 | 15.361 | 10.590 | 13.951 | 19.068 |
| 25 | 0.3478 | 8.251  | 7.107  | 9.641  | 8.920  | 10.767 |
| 25 | 0.3488 | 8.253  | 7.110  | 9.643  | 8.922  | 10.771 |
| 25 | 0.3498 | 5.433  | 6.768  | 4.989  | 16.222 | 18.471 |
| 25 | 0.3508 | 5.581  | 4.428  | 4.168  | 15.491 | 18.170 |
| 25 | 0.3518 | 9.619  | 9.913  | 7.783  | 13.780 | 17.471 |
| 25 | 0.3528 | 8.237  | 7.912  | 8.401  | 17.710 | 27.923 |
| 25 | 0.3538 | 10.221 | 11.158 | 14.578 | 11.754 | 18.448 |
| 25 | 0.3548 | 11.554 | 21.565 | 18.160 | 31.885 | 27.943 |



|    |        |        |        |        |        |        |
|----|--------|--------|--------|--------|--------|--------|
| 25 | 0.3558 | 12.247 | 15.180 | 12.238 | 19.671 | 21.915 |
| 25 | 0.3568 | 16.444 | 12.564 | 14.618 | 6.312  | 17.390 |
| 25 | 0.3578 | 11.774 | 7.606  | 8.000  | 6.668  | 13.365 |
| 25 | 0.3588 | 10.143 | 5.445  | 9.146  | 5.975  | 13.309 |
| 25 | 0.3598 | 8.084  | 10.713 | 11.633 | 9.757  | 8.532  |
| 25 | 0.3608 | 7.889  | 9.658  | 9.217  | 7.299  | 9.760  |
| 25 | 0.3618 | 12.716 | 11.447 | 11.439 | 9.574  | 12.173 |
| 25 | 0.3628 | 5.796  | 6.741  | 3.910  | 8.507  | 15.967 |
| 25 | 0.3638 | 14.247 | 11.020 | 9.449  | 17.770 | 21.191 |
| 25 | 0.3648 | 5.386  | 11.149 | 8.346  | 14.695 | 17.500 |
| 25 | 0.3658 | 5.407  | 11.206 | 8.338  | 14.785 | 17.460 |
| 25 | 0.3668 | 10.746 | 12.798 | 13.934 | 12.136 | 15.503 |
| 25 | 0.3678 | 5.940  | 9.360  | 11.402 | 10.606 | 16.528 |
| 25 | 0.3688 | 18.660 | 23.325 | 21.501 | 8.193  | 22.485 |
| 25 | 0.3698 | 13.203 | 18.095 | 14.775 | 14.873 | 19.726 |
| 25 | 0.3708 | 8.728  | 10.111 | 12.722 | 20.610 | 14.594 |
| 25 | 0.3718 | 11.202 | 12.628 | 9.453  | 7.561  | 13.051 |
| 25 | 0.3728 | 8.690  | 5.614  | 7.715  | 14.249 | 11.796 |
| 25 | 0.3738 | 8.789  | 5.758  | 7.839  | 14.258 | 11.764 |
| 25 | 0.3748 | 8.682  | 9.422  | 10.617 | 13.680 | 13.334 |
| 25 | 0.3758 | 8.014  | 18.061 | 14.785 | 10.698 | 12.871 |
| 25 | 0.3768 | 13.979 | 10.927 | 9.890  | 9.028  | 10.321 |
| 25 | 0.3778 | 18.709 | 18.661 | 13.869 | 14.406 | 9.659  |
| 25 | 0.3788 | 12.208 | 12.515 | 8.835  | 17.544 | 15.286 |
| 25 | 0.3798 | 9.650  | 10.354 | 12.032 | 9.257  | 17.214 |
| 25 | 0.3808 | 5.200  | 6.287  | 5.478  | 14.427 | 21.725 |
| 25 | 0.3818 | 9.686  | 10.507 | 8.087  | 18.733 | 21.033 |
| 25 | 0.3828 | 13.366 | 11.568 | 10.372 | 12.656 | 9.762  |
| 25 | 0.3838 | 9.241  | 13.330 | 7.265  | 18.027 | 13.557 |
| 25 | 0.3848 | 8.903  | 15.265 | 8.281  | 11.917 | 14.688 |
| 25 | 0.3858 | 10.048 | 12.651 | 12.186 | 12.240 | 19.696 |
| 25 | 0.3868 | 4.738  | 9.250  | 6.628  | 16.341 | 19.735 |
| 25 | 0.3878 | 4.746  | 9.274  | 6.649  | 16.359 | 19.796 |
| 25 | 0.3888 | 5.442  | 9.866  | 5.493  | 18.786 | 22.271 |
| 25 | 0.3898 | 10.997 | 11.182 | 14.885 | 12.009 | 6.542  |
| 25 | 0.3908 | 8.859  | 8.798  | 10.474 | 2.766  | 12.904 |
| 25 | 0.3918 | 11.419 | 7.525  | 10.516 | 10.133 | 29.265 |
| 25 | 0.3928 | 13.112 | 14.115 | 13.938 | 13.255 | 24.348 |
| 25 | 0.3938 | 3.179  | 2.715  | 4.347  | 6.103  | 22.238 |
| 25 | 0.3948 | 5.120  | 7.302  | 6.738  | 13.988 | 23.729 |
| 25 | 0.3958 | 7.358  | 7.448  | 10.583 | 8.816  | 21.752 |
| 25 | 0.3968 | 9.038  | 9.255  | 11.917 | 15.414 | 27.605 |
| 25 | 0.3978 | 9.539  | 11.137 | 8.818  | 12.307 | 26.811 |
| 25 | 0.3988 | 14.026 | 11.537 | 13.866 | 15.705 | 20.650 |
| 25 | 0.3998 | 13.511 | 11.388 | 12.460 | 13.686 | 17.872 |
| 25 | 0.4008 | 7.208  | 7.975  | 7.870  | 9.656  | 22.817 |
| 25 | 0.4018 | 9.496  | 6.934  | 8.941  | 9.089  | 19.323 |
| 25 | 0.4028 | 3.846  | 7.115  | 9.709  | 12.809 | 23.678 |
| 25 | 0.4038 | 7.816  | 7.187  | 10.094 | 13.756 | 18.642 |
| 25 | 0.4048 | 11.105 | 13.467 | 9.029  | 17.793 | 23.969 |

|    |        |        |        |        |        |        |
|----|--------|--------|--------|--------|--------|--------|
| 25 | 0.4058 | 5.517  | 7.292  | 7.614  | 16.876 | 18.330 |
| 25 | 0.4068 | 12.094 | 14.476 | 12.888 | 10.456 | 11.703 |
| 25 | 0.4078 | 6.743  | 5.763  | 4.427  | 3.331  | 11.518 |
| 25 | 0.4088 | 6.742  | 5.756  | 4.410  | 3.312  | 11.473 |
| 25 | 0.4098 | 3.957  | 3.600  | 3.037  | 10.350 | 22.556 |
| 25 | 0.4108 | 5.942  | 4.973  | 7.479  | 6.659  | 13.450 |
| 25 | 0.4118 | 7.478  | 11.296 | 11.960 | 10.762 | 24.744 |
| 25 | 0.4128 | 18.891 | 17.265 | 14.937 | 17.411 | 24.310 |
| 25 | 0.4138 | 11.961 | 7.787  | 7.289  | 12.195 | 24.424 |
| 25 | 0.4148 | 0.000  | 0.000  | 0.000  | 0.000  | 0.000  |
| 26 | 0.0016 | 0.000  | 0.000  | 0.000  | 0.000  | 0.000  |
| 26 | 0.0026 | 7.024  | 4.498  | 6.390  | 3.039  | 7.888  |
| 26 | 0.0036 | 14.562 | 6.033  | 8.887  | 21.205 | 20.678 |
| 26 | 0.0046 | 14.915 | 7.067  | 9.145  | 12.534 | 8.939  |
| 26 | 0.0056 | 18.519 | 8.770  | 8.859  | 22.277 | 17.539 |
| 26 | 0.0066 | 18.068 | 11.457 | 12.534 | 15.351 | 15.228 |
| 26 | 0.0076 | 22.044 | 13.014 | 13.554 | 8.190  | 7.834  |
| 26 | 0.0086 | 12.093 | 6.667  | 6.989  | 9.212  | 9.971  |
| 26 | 0.0096 | 15.368 | 12.321 | 15.591 | 7.034  | 16.116 |
| 26 | 0.0106 | 13.546 | 10.168 | 8.142  | 4.126  | 16.782 |
| 26 | 0.0116 | 9.309  | 3.392  | 5.821  | 10.834 | 18.062 |
| 26 | 0.0126 | 6.621  | 4.407  | 5.569  | 11.904 | 11.810 |
| 26 | 0.0136 | 8.423  | 4.782  | 4.537  | 4.361  | 14.070 |
| 26 | 0.0146 | 11.189 | 6.313  | 7.741  | 5.346  | 7.016  |
| 26 | 0.0156 | 12.462 | 7.245  | 12.318 | 6.267  | 9.373  |
| 26 | 0.0166 | 6.504  | 7.004  | 5.906  | 11.057 | 6.819  |
| 26 | 0.0176 | 17.267 | 7.399  | 5.959  | 10.879 | 16.283 |
| 26 | 0.0186 | 8.513  | 15.115 | 9.260  | 8.704  | 14.625 |
| 26 | 0.0196 | 7.764  | 7.332  | 7.151  | 14.047 | 6.345  |
| 26 | 0.0206 | 8.828  | 14.752 | 5.147  | 20.531 | 7.972  |
| 26 | 0.0216 | 10.574 | 13.818 | 9.661  | 9.471  | 7.213  |
| 26 | 0.0226 | 11.434 | 13.580 | 11.346 | 10.123 | 12.926 |
| 26 | 0.0236 | 11.013 | 4.442  | 8.921  | 7.637  | 5.948  |
| 26 | 0.0246 | 4.386  | 9.102  | 3.655  | 13.320 | 11.206 |
| 26 | 0.0256 | 13.606 | 15.494 | 10.212 | 16.625 | 15.343 |
| 26 | 0.0266 | 17.722 | 13.062 | 13.201 | 12.989 | 9.068  |
| 26 | 0.0276 | 19.591 | 11.506 | 11.895 | 18.881 | 9.332  |
| 26 | 0.0286 | 11.002 | 13.410 | 11.483 | 11.608 | 6.218  |
| 26 | 0.0296 | 10.183 | 10.547 | 9.471  | 11.368 | 12.380 |
| 26 | 0.0306 | 2.008  | 5.166  | 3.095  | 7.324  | 11.471 |
| 26 | 0.0316 | 2.172  | 3.557  | 1.482  | 8.061  | 7.677  |
| 26 | 0.0326 | 6.314  | 7.045  | 5.780  | 5.980  | 7.706  |
| 26 | 0.0336 | 7.223  | 10.609 | 7.171  | 13.075 | 11.790 |
| 26 | 0.0346 | 11.831 | 10.652 | 10.152 | 23.115 | 16.845 |
| 26 | 0.0356 | 11.187 | 8.657  | 7.883  | 16.216 | 10.147 |
| 26 | 0.0366 | 10.941 | 16.776 | 15.955 | 11.005 | 13.556 |
| 26 | 0.0376 | 17.742 | 15.122 | 17.075 | 12.590 | 15.914 |
| 26 | 0.0386 | 10.353 | 9.721  | 11.824 | 12.834 | 12.643 |
| 26 | 0.0396 | 12.515 | 15.845 | 14.681 | 13.123 | 7.440  |
| 26 | 0.0406 | 15.619 | 16.899 | 14.602 | 26.239 | 13.652 |

|    |        |        |        |        |        |        |
|----|--------|--------|--------|--------|--------|--------|
| 26 | 0.0416 | 11.685 | 11.463 | 14.187 | 13.362 | 15.849 |
| 26 | 0.0426 | 12.439 | 11.482 | 11.418 | 13.343 | 12.101 |
| 26 | 0.0436 | 13.773 | 18.603 | 18.571 | 20.222 | 11.775 |
| 26 | 0.0446 | 13.387 | 15.463 | 13.820 | 24.436 | 9.089  |
| 26 | 0.0456 | 15.038 | 23.602 | 23.766 | 16.620 | 10.455 |
| 26 | 0.0466 | 26.192 | 29.498 | 29.846 | 27.778 | 14.446 |
| 26 | 0.0476 | 17.061 | 26.490 | 17.759 | 15.465 | 8.871  |
| 26 | 0.0486 | 23.364 | 22.625 | 18.160 | 14.071 | 11.962 |
| 26 | 0.0496 | 14.997 | 14.033 | 16.475 | 16.601 | 26.158 |
| 26 | 0.0506 | 12.805 | 25.049 | 18.020 | 23.544 | 13.178 |
| 26 | 0.0516 | 9.760  | 10.089 | 9.078  | 14.851 | 16.780 |
| 26 | 0.0526 | 9.305  | 10.810 | 8.195  | 26.125 | 7.640  |
| 26 | 0.0536 | 11.000 | 13.458 | 13.595 | 14.144 | 15.024 |
| 26 | 0.0546 | 20.637 | 19.877 | 21.133 | 18.559 | 14.859 |
| 26 | 0.0556 | 16.428 | 14.380 | 18.908 | 13.036 | 16.514 |
| 26 | 0.0566 | 11.435 | 11.833 | 12.399 | 9.294  | 16.219 |
| 26 | 0.0576 | 11.182 | 3.835  | 6.396  | 16.391 | 19.052 |
| 26 | 0.0586 | 10.742 | 7.966  | 10.046 | 6.945  | 15.931 |
| 26 | 0.0596 | 12.017 | 12.096 | 13.140 | 22.652 | 22.489 |
| 26 | 0.0606 | 10.328 | 17.883 | 14.508 | 3.644  | 8.934  |
| 26 | 0.0616 | 6.268  | 8.639  | 7.382  | 10.193 | 12.226 |
| 26 | 0.0626 | 7.471  | 7.167  | 7.325  | 11.446 | 13.768 |
| 26 | 0.0636 | 19.194 | 14.492 | 19.780 | 19.482 | 11.860 |
| 26 | 0.0646 | 11.553 | 8.617  | 15.552 | 7.799  | 9.235  |
| 26 | 0.0656 | 15.103 | 20.342 | 13.893 | 12.351 | 8.334  |
| 26 | 0.0666 | 18.415 | 16.439 | 21.891 | 7.749  | 5.460  |
| 26 | 0.0676 | 13.361 | 16.811 | 16.016 | 26.894 | 10.468 |
| 26 | 0.0686 | 18.452 | 17.635 | 19.998 | 15.011 | 13.533 |
| 26 | 0.0696 | 26.728 | 17.563 | 28.945 | 9.920  | 8.478  |
| 26 | 0.0706 | 8.713  | 10.451 | 8.357  | 18.305 | 13.441 |
| 26 | 0.0716 | 12.477 | 13.482 | 15.804 | 24.022 | 18.730 |
| 26 | 0.0726 | 5.657  | 8.969  | 8.768  | 17.854 | 15.864 |
| 26 | 0.0736 | 12.682 | 11.779 | 17.276 | 9.342  | 12.059 |
| 26 | 0.0746 | 9.524  | 6.016  | 12.999 | 15.767 | 10.479 |
| 26 | 0.0756 | 16.383 | 11.952 | 13.845 | 8.836  | 16.630 |
| 26 | 0.0766 | 14.793 | 8.846  | 11.048 | 15.496 | 16.592 |
| 26 | 0.0776 | 22.617 | 11.409 | 17.844 | 16.769 | 13.723 |
| 26 | 0.0786 | 16.338 | 11.009 | 17.160 | 17.917 | 15.404 |
| 26 | 0.0796 | 10.144 | 6.685  | 10.047 | 17.372 | 8.539  |
| 26 | 0.0806 | 11.324 | 8.960  | 7.536  | 19.683 | 26.892 |
| 26 | 0.0816 | 7.959  | 8.870  | 10.487 | 7.780  | 11.612 |
| 26 | 0.0826 | 5.987  | 2.861  | 3.590  | 8.765  | 9.688  |
| 26 | 0.0836 | 16.252 | 10.307 | 17.193 | 28.455 | 19.718 |
| 26 | 0.0846 | 9.162  | 5.230  | 10.140 | 6.469  | 13.137 |
| 26 | 0.0856 | 14.079 | 5.544  | 11.035 | 15.220 | 11.769 |
| 26 | 0.0866 | 18.851 | 6.894  | 18.750 | 19.562 | 14.298 |
| 26 | 0.0876 | 29.943 | 19.348 | 24.366 | 25.277 | 13.103 |
| 26 | 0.0886 | 15.400 | 10.509 | 11.259 | 36.066 | 15.337 |
| 26 | 0.0896 | 20.057 | 14.869 | 18.530 | 13.440 | 24.644 |
| 26 | 0.0906 | 5.506  | 9.944  | 9.216  | 10.184 | 15.166 |

|    |        |        |        |        |        |        |
|----|--------|--------|--------|--------|--------|--------|
| 26 | 0.0916 | 13.479 | 16.074 | 15.513 | 15.895 | 19.242 |
| 26 | 0.0926 | 15.374 | 14.810 | 15.329 | 10.267 | 5.376  |
| 26 | 0.0936 | 13.570 | 12.697 | 17.388 | 11.492 | 20.803 |
| 26 | 0.0946 | 11.658 | 5.443  | 10.906 | 20.895 | 14.296 |
| 26 | 0.0956 | 7.978  | 3.801  | 8.347  | 22.525 | 22.354 |
| 26 | 0.0966 | 25.356 | 14.010 | 27.785 | 17.985 | 23.231 |
| 26 | 0.0976 | 15.372 | 10.940 | 13.840 | 18.561 | 27.110 |
| 26 | 0.0986 | 17.428 | 15.160 | 16.345 | 22.990 | 32.662 |
| 26 | 0.0996 | 8.695  | 7.449  | 6.685  | 12.163 | 30.896 |
| 26 | 0.1006 | 14.650 | 10.831 | 12.971 | 13.680 | 19.146 |
| 26 | 0.1016 | 12.242 | 3.526  | 7.037  | 8.229  | 15.827 |
| 26 | 0.1026 | 10.687 | 8.081  | 7.596  | 19.631 | 16.416 |
| 26 | 0.1036 | 8.013  | 9.185  | 11.001 | 19.478 | 16.245 |
| 26 | 0.1046 | 6.822  | 6.439  | 9.933  | 12.910 | 11.662 |
| 26 | 0.1056 | 9.749  | 9.470  | 10.283 | 17.771 | 14.755 |
| 26 | 0.1066 | 8.771  | 14.571 | 11.025 | 24.650 | 14.445 |
| 26 | 0.1076 | 9.607  | 10.268 | 5.351  | 26.981 | 16.378 |
| 26 | 0.1086 | 14.673 | 13.345 | 10.784 | 33.994 | 29.178 |
| 26 | 0.1096 | 19.535 | 24.671 | 13.104 | 26.036 | 24.697 |
| 26 | 0.1106 | 11.782 | 8.458  | 12.664 | 21.974 | 19.891 |
| 26 | 0.1116 | 18.101 | 13.329 | 9.755  | 21.353 | 19.843 |
| 26 | 0.1126 | 9.827  | 15.063 | 8.941  | 25.827 | 20.822 |
| 26 | 0.1136 | 25.459 | 22.125 | 15.410 | 9.835  | 16.740 |
| 26 | 0.1146 | 20.549 | 14.905 | 15.242 | 13.761 | 25.365 |
| 26 | 0.1156 | 24.772 | 14.080 | 12.440 | 26.910 | 20.799 |
| 26 | 0.1166 | 16.111 | 23.307 | 18.382 | 13.193 | 23.789 |
| 26 | 0.1176 | 15.961 | 12.822 | 12.397 | 7.554  | 9.698  |
| 26 | 0.1186 | 26.643 | 21.530 | 18.859 | 10.971 | 14.472 |
| 26 | 0.1196 | 18.694 | 16.835 | 18.804 | 11.824 | 8.714  |
| 26 | 0.1206 | 15.723 | 9.553  | 15.065 | 21.545 | 6.328  |
| 26 | 0.1216 | 17.295 | 21.063 | 14.017 | 21.896 | 22.959 |
| 26 | 0.1226 | 20.773 | 21.292 | 24.367 | 19.126 | 20.130 |
| 26 | 0.1236 | 18.015 | 7.873  | 18.273 | 13.918 | 25.042 |
| 26 | 0.1246 | 8.237  | 6.046  | 10.528 | 19.639 | 7.982  |
| 26 | 0.1256 | 9.336  | 4.955  | 10.999 | 10.222 | 4.133  |
| 26 | 0.1266 | 16.647 | 11.417 | 11.183 | 14.166 | 25.289 |
| 26 | 0.1276 | 20.177 | 15.349 | 18.371 | 25.061 | 15.588 |
| 26 | 0.1286 | 18.919 | 10.971 | 15.296 | 9.963  | 13.546 |
| 26 | 0.1296 | 21.345 | 11.885 | 11.013 | 14.255 | 28.679 |
| 26 | 0.1306 | 21.801 | 10.819 | 13.089 | 11.179 | 22.523 |
| 26 | 0.1316 | 15.863 | 16.156 | 14.834 | 9.915  | 19.571 |
| 26 | 0.1326 | 15.049 | 12.180 | 9.420  | 12.343 | 24.924 |
| 26 | 0.1336 | 15.492 | 13.336 | 11.941 | 16.648 | 26.533 |
| 26 | 0.1346 | 25.022 | 16.941 | 23.348 | 21.850 | 22.656 |
| 26 | 0.1356 | 17.825 | 17.473 | 20.193 | 14.146 | 20.520 |
| 26 | 0.1366 | 31.111 | 20.887 | 28.639 | 10.798 | 13.902 |
| 26 | 0.1376 | 25.803 | 28.762 | 25.343 | 9.995  | 12.973 |
| 26 | 0.1386 | 24.177 | 29.265 | 22.248 | 12.064 | 16.589 |
| 26 | 0.1396 | 18.931 | 18.503 | 15.458 | 9.119  | 11.268 |
| 26 | 0.1406 | 13.161 | 15.190 | 7.188  | 10.908 | 18.541 |

|    |        |        |        |        |        |        |
|----|--------|--------|--------|--------|--------|--------|
| 26 | 0.1416 | 25.278 | 26.997 | 21.110 | 14.043 | 19.988 |
| 26 | 0.1426 | 23.537 | 23.370 | 18.387 | 6.621  | 25.732 |
| 26 | 0.1436 | 24.111 | 15.370 | 16.733 | 10.575 | 29.508 |
| 26 | 0.1446 | 15.486 | 16.761 | 19.073 | 6.995  | 22.684 |
| 26 | 0.1456 | 18.147 | 18.870 | 14.214 | 13.421 | 18.327 |
| 26 | 0.1466 | 18.796 | 17.712 | 16.971 | 6.453  | 23.109 |
| 26 | 0.1476 | 6.191  | 4.416  | 4.730  | 2.094  | 4.239  |
| 26 | 0.1486 | 12.975 | 11.920 | 9.688  | 5.744  | 19.942 |
| 26 | 0.1496 | 35.125 | 25.390 | 30.144 | 17.335 | 25.844 |
| 26 | 0.1506 | 25.710 | 18.727 | 23.821 | 16.833 | 22.793 |
| 26 | 0.1516 | 20.085 | 18.590 | 20.571 | 13.686 | 17.369 |
| 26 | 0.1526 | 26.948 | 19.865 | 20.911 | 19.531 | 25.181 |
| 26 | 0.1536 | 15.046 | 12.767 | 10.810 | 14.193 | 19.251 |
| 26 | 0.1546 | 8.778  | 12.393 | 8.763  | 9.035  | 9.180  |
| 26 | 0.1556 | 28.707 | 27.755 | 22.625 | 8.933  | 9.490  |
| 26 | 0.1566 | 9.872  | 9.449  | 4.562  | 6.950  | 17.667 |
| 26 | 0.1576 | 9.808  | 10.876 | 6.052  | 7.067  | 12.388 |
| 26 | 0.1586 | 11.502 | 7.874  | 8.032  | 5.843  | 16.175 |
| 26 | 0.1596 | 9.224  | 8.034  | 10.521 | 5.346  | 14.635 |
| 26 | 0.1606 | 18.216 | 15.827 | 15.824 | 11.789 | 17.163 |
| 26 | 0.1616 | 15.420 | 10.882 | 13.859 | 11.539 | 32.885 |
| 26 | 0.1626 | 7.362  | 8.871  | 7.634  | 10.821 | 23.060 |
| 26 | 0.1636 | 14.007 | 16.162 | 12.180 | 9.739  | 10.169 |
| 26 | 0.1646 | 6.271  | 2.987  | 4.125  | 4.324  | 19.435 |
| 26 | 0.1656 | 2.270  | 2.620  | 0.971  | 3.869  | 3.504  |
| 26 | 0.1666 | 7.558  | 5.444  | 4.400  | 6.980  | 12.278 |
| 26 | 0.1676 | 18.652 | 14.521 | 10.284 | 18.681 | 24.942 |
| 26 | 0.1686 | 15.645 | 20.383 | 8.957  | 12.917 | 19.412 |
| 26 | 0.1696 | 24.070 | 15.934 | 17.458 | 8.714  | 21.967 |
| 26 | 0.1706 | 14.512 | 13.914 | 9.898  | 12.755 | 13.045 |
| 26 | 0.1716 | 30.634 | 25.560 | 27.597 | 11.390 | 18.924 |
| 26 | 0.1726 | 28.430 | 33.551 | 26.411 | 8.338  | 13.094 |
| 26 | 0.1736 | 20.552 | 23.717 | 16.413 | 12.809 | 17.692 |
| 26 | 0.1746 | 13.315 | 10.068 | 9.762  | 13.148 | 13.230 |
| 26 | 0.1756 | 20.034 | 16.976 | 15.920 | 14.149 | 20.728 |
| 26 | 0.1766 | 20.031 | 16.975 | 15.926 | 14.156 | 20.761 |
| 26 | 0.1776 | 10.835 | 7.990  | 7.232  | 5.876  | 15.955 |
| 26 | 0.1786 | 15.921 | 12.121 | 11.421 | 15.672 | 21.786 |
| 26 | 0.1796 | 18.762 | 20.339 | 14.699 | 17.001 | 18.225 |
| 26 | 0.1806 | 11.221 | 11.367 | 8.811  | 13.248 | 14.616 |
| 26 | 0.1816 | 16.023 | 12.589 | 10.466 | 11.546 | 29.019 |
| 26 | 0.1826 | 12.366 | 14.749 | 10.898 | 17.891 | 22.246 |
| 26 | 0.1836 | 24.339 | 19.757 | 15.371 | 9.666  | 25.339 |
| 26 | 0.1846 | 17.966 | 16.799 | 16.014 | 14.842 | 24.012 |
| 26 | 0.1856 | 6.288  | 6.254  | 4.447  | 5.716  | 10.021 |
| 26 | 0.1866 | 7.116  | 6.429  | 3.939  | 7.346  | 9.968  |
| 26 | 0.1876 | 18.071 | 24.295 | 15.495 | 15.756 | 16.879 |
| 26 | 0.1886 | 12.689 | 16.557 | 13.598 | 12.577 | 20.635 |
| 26 | 0.1896 | 10.637 | 12.327 | 10.338 | 11.593 | 13.430 |
| 26 | 0.1906 | 4.119  | 5.913  | 3.235  | 9.607  | 8.562  |

|    |        |        |        |        |        |        |
|----|--------|--------|--------|--------|--------|--------|
| 26 | 0.1916 | 8.393  | 9.831  | 5.090  | 17.469 | 21.846 |
| 26 | 0.1926 | 18.772 | 18.204 | 11.621 | 22.526 | 31.931 |
| 26 | 0.1936 | 11.691 | 10.982 | 6.715  | 5.686  | 18.288 |
| 26 | 0.1946 | 7.267  | 10.691 | 10.209 | 7.586  | 9.580  |
| 26 | 0.1956 | 8.082  | 14.174 | 8.045  | 9.843  | 15.212 |
| 26 | 0.1966 | 4.853  | 9.733  | 3.918  | 7.943  | 10.497 |
| 26 | 0.1976 | 12.905 | 14.299 | 9.765  | 12.278 | 4.653  |
| 26 | 0.1986 | 8.671  | 16.992 | 8.412  | 17.237 | 19.859 |
| 26 | 0.1996 | 20.412 | 11.763 | 10.749 | 10.434 | 17.059 |
| 26 | 0.2006 | 22.437 | 11.175 | 16.083 | 16.413 | 9.632  |
| 26 | 0.2016 | 26.881 | 18.847 | 19.762 | 13.221 | 16.120 |
| 26 | 0.2026 | 23.934 | 17.407 | 15.524 | 13.749 | 31.413 |
| 26 | 0.2036 | 5.500  | 8.098  | 4.221  | 11.657 | 11.326 |
| 26 | 0.2046 | 8.296  | 10.144 | 6.563  | 7.368  | 3.522  |
| 26 | 0.2056 | 10.155 | 11.335 | 8.054  | 7.106  | 5.719  |
| 26 | 0.2066 | 8.318  | 10.252 | 5.390  | 6.865  | 15.486 |
| 26 | 0.2076 | 5.721  | 3.727  | 4.982  | 3.164  | 4.863  |
| 26 | 0.2086 | 12.541 | 18.902 | 12.367 | 9.123  | 12.472 |
| 26 | 0.2096 | 10.235 | 11.899 | 7.092  | 10.844 | 4.022  |
| 26 | 0.2106 | 11.408 | 3.190  | 4.539  | 5.473  | 21.082 |
| 26 | 0.2116 | 22.203 | 15.251 | 17.352 | 16.729 | 38.724 |
| 26 | 0.2126 | 13.189 | 6.998  | 9.495  | 17.494 | 27.099 |
| 26 | 0.2136 | 7.331  | 5.909  | 1.568  | 10.337 | 9.248  |
| 26 | 0.2146 | 13.352 | 12.819 | 9.074  | 19.645 | 25.952 |
| 26 | 0.2156 | 18.374 | 19.514 | 13.366 | 19.678 | 19.131 |
| 26 | 0.2166 | 2.470  | 4.321  | 2.561  | 15.986 | 15.258 |
| 26 | 0.2176 | 10.480 | 9.067  | 6.626  | 11.702 | 19.815 |
| 26 | 0.2186 | 26.037 | 17.094 | 19.122 | 14.656 | 27.069 |
| 26 | 0.2196 | 16.748 | 22.210 | 13.959 | 13.643 | 20.336 |
| 26 | 0.2206 | 12.930 | 18.738 | 14.216 | 7.461  | 3.751  |
| 26 | 0.2216 | 16.201 | 13.984 | 13.282 | 12.963 | 8.717  |
| 26 | 0.2226 | 21.955 | 16.912 | 16.899 | 8.177  | 17.401 |
| 26 | 0.2236 | 11.791 | 14.147 | 9.325  | 15.786 | 17.621 |
| 26 | 0.2246 | 9.655  | 7.001  | 9.257  | 5.505  | 8.050  |
| 26 | 0.2256 | 8.474  | 12.874 | 9.392  | 6.100  | 15.393 |
| 26 | 0.2266 | 9.933  | 12.353 | 10.247 | 7.462  | 14.296 |
| 26 | 0.2276 | 17.900 | 23.359 | 22.221 | 10.240 | 11.839 |
| 26 | 0.2286 | 31.333 | 26.008 | 25.645 | 9.116  | 21.711 |
| 26 | 0.2296 | 15.120 | 12.941 | 13.591 | 15.658 | 26.052 |
| 26 | 0.2306 | 14.162 | 6.581  | 12.828 | 19.338 | 27.695 |
| 26 | 0.2316 | 21.277 | 15.595 | 16.928 | 15.660 | 33.929 |
| 26 | 0.2326 | 18.414 | 12.976 | 16.513 | 13.267 | 8.832  |
| 26 | 0.2336 | 10.978 | 10.224 | 13.796 | 11.778 | 10.636 |
| 26 | 0.2346 | 20.537 | 11.646 | 21.222 | 9.357  | 15.732 |
| 26 | 0.2356 | 19.283 | 11.540 | 12.330 | 15.160 | 15.354 |
| 26 | 0.2366 | 25.254 | 12.763 | 19.771 | 10.312 | 32.309 |
| 26 | 0.2376 | 25.465 | 12.938 | 19.874 | 10.191 | 32.230 |
| 26 | 0.2386 | 30.491 | 19.657 | 24.122 | 15.707 | 40.099 |
| 26 | 0.2396 | 33.298 | 19.493 | 19.918 | 14.184 | 28.780 |
| 26 | 0.2406 | 32.672 | 23.461 | 20.040 | 12.265 | 34.162 |

|    |        |        |        |        |        |        |
|----|--------|--------|--------|--------|--------|--------|
| 26 | 0.2416 | 24.539 | 21.872 | 14.892 | 10.754 | 36.205 |
| 26 | 0.2426 | 19.188 | 10.711 | 8.162  | 15.986 | 45.111 |
| 26 | 0.2436 | 14.736 | 12.167 | 6.970  | 12.052 | 33.280 |
| 26 | 0.2446 | 23.553 | 18.097 | 17.843 | 15.996 | 30.952 |
| 26 | 0.2456 | 19.830 | 16.192 | 12.174 | 13.433 | 28.255 |
| 26 | 0.2466 | 26.209 | 18.816 | 17.795 | 16.082 | 13.941 |
| 26 | 0.2476 | 12.078 | 15.468 | 12.959 | 19.823 | 13.077 |
| 26 | 0.2486 | 31.811 | 26.720 | 21.738 | 12.882 | 23.698 |
| 26 | 0.2496 | 27.603 | 17.608 | 18.586 | 13.211 | 24.246 |
| 26 | 0.2506 | 27.182 | 17.588 | 18.324 | 13.112 | 24.093 |
| 26 | 0.2516 | 18.199 | 13.519 | 14.476 | 12.203 | 9.130  |
| 26 | 0.2526 | 18.571 | 13.310 | 14.734 | 12.193 | 9.009  |
| 26 | 0.2536 | 32.163 | 36.874 | 33.170 | 13.333 | 13.786 |
| 26 | 0.2546 | 15.973 | 12.807 | 11.692 | 18.433 | 10.117 |
| 26 | 0.2556 | 15.617 | 12.792 | 11.859 | 18.162 | 10.146 |
| 26 | 0.2566 | 16.638 | 11.092 | 11.327 | 12.331 | 14.080 |
| 26 | 0.2576 | 14.336 | 9.609  | 14.269 | 11.991 | 12.191 |
| 26 | 0.2586 | 7.248  | 9.084  | 10.558 | 22.468 | 21.244 |
| 26 | 0.2596 | 24.737 | 17.491 | 18.900 | 8.984  | 19.659 |
| 26 | 0.2606 | 13.613 | 11.230 | 11.385 | 11.030 | 9.717  |
| 26 | 0.2616 | 28.341 | 16.657 | 18.891 | 22.874 | 17.077 |
| 26 | 0.2626 | 23.917 | 19.573 | 19.950 | 18.399 | 10.832 |
| 26 | 0.2636 | 20.705 | 12.577 | 14.451 | 20.328 | 14.498 |
| 26 | 0.2646 | 19.750 | 19.449 | 15.208 | 9.598  | 22.419 |
| 26 | 0.2656 | 22.137 | 13.253 | 11.781 | 12.437 | 17.774 |
| 26 | 0.2666 | 13.571 | 22.743 | 9.728  | 12.657 | 18.501 |
| 26 | 0.2676 | 11.960 | 20.694 | 10.932 | 9.475  | 7.534  |
| 26 | 0.2686 | 34.538 | 16.064 | 17.526 | 20.739 | 20.942 |
| 26 | 0.2696 | 25.254 | 15.991 | 13.826 | 19.032 | 27.160 |
| 26 | 0.2706 | 12.285 | 8.768  | 5.157  | 10.835 | 14.806 |
| 26 | 0.2716 | 20.571 | 13.196 | 11.384 | 11.582 | 23.119 |
| 26 | 0.2726 | 22.412 | 13.546 | 14.991 | 6.036  | 8.903  |
| 26 | 0.2736 | 22.960 | 21.410 | 14.776 | 11.796 | 22.869 |
| 26 | 0.2746 | 15.445 | 10.918 | 9.976  | 7.927  | 21.984 |
| 26 | 0.2756 | 10.288 | 8.470  | 10.196 | 3.222  | 12.586 |
| 26 | 0.2766 | 8.624  | 10.547 | 10.175 | 10.745 | 12.448 |
| 26 | 0.2776 | 7.732  | 14.648 | 7.853  | 13.433 | 10.305 |
| 26 | 0.2786 | 11.007 | 7.682  | 6.544  | 7.072  | 11.428 |
| 26 | 0.2796 | 22.946 | 18.019 | 21.574 | 11.999 | 20.821 |
| 26 | 0.2806 | 28.170 | 27.571 | 20.692 | 16.551 | 15.923 |
| 26 | 0.2816 | 28.089 | 12.873 | 15.289 | 15.148 | 18.283 |
| 26 | 0.2826 | 15.391 | 14.119 | 8.849  | 10.314 | 13.164 |
| 26 | 0.2836 | 11.918 | 16.538 | 12.441 | 10.428 | 15.249 |
| 26 | 0.2846 | 8.443  | 9.800  | 10.043 | 2.784  | 12.307 |
| 26 | 0.2856 | 17.705 | 20.787 | 19.389 | 16.921 | 29.469 |
| 26 | 0.2866 | 25.374 | 20.235 | 14.204 | 18.279 | 29.589 |
| 26 | 0.2876 | 9.118  | 10.564 | 10.095 | 15.796 | 7.591  |
| 26 | 0.2886 | 9.479  | 10.431 | 9.307  | 11.258 | 13.550 |
| 26 | 0.2896 | 7.843  | 10.073 | 8.747  | 12.698 | 19.589 |
| 26 | 0.2906 | 20.668 | 16.802 | 16.186 | 6.507  | 25.152 |

|    |        |        |        |        |        |        |
|----|--------|--------|--------|--------|--------|--------|
| 26 | 0.2916 | 20.062 | 15.704 | 15.330 | 8.908  | 27.741 |
| 26 | 0.2926 | 12.124 | 15.835 | 12.697 | 8.430  | 18.544 |
| 26 | 0.2936 | 10.705 | 15.762 | 12.029 | 10.777 | 21.097 |
| 26 | 0.2946 | 10.578 | 14.278 | 12.395 | 14.701 | 20.834 |
| 26 | 0.2956 | 5.108  | 6.912  | 5.972  | 7.347  | 15.111 |
| 26 | 0.2966 | 6.583  | 8.739  | 7.252  | 12.552 | 14.531 |
| 26 | 0.2976 | 17.900 | 14.500 | 13.825 | 10.055 | 9.640  |
| 26 | 0.2986 | 10.581 | 16.066 | 13.075 | 8.618  | 11.107 |
| 26 | 0.2996 | 8.687  | 13.835 | 10.015 | 11.827 | 13.738 |
| 26 | 0.3006 | 12.261 | 14.781 | 10.837 | 10.168 | 17.207 |
| 26 | 0.3016 | 13.934 | 9.145  | 10.917 | 12.998 | 20.027 |
| 26 | 0.3026 | 3.732  | 9.865  | 6.209  | 6.963  | 9.549  |
| 26 | 0.3036 | 6.506  | 14.515 | 7.122  | 9.667  | 10.446 |
| 26 | 0.3046 | 13.255 | 18.482 | 13.679 | 16.679 | 24.530 |
| 26 | 0.3056 | 21.932 | 8.562  | 11.190 | 7.630  | 25.597 |
| 26 | 0.3066 | 26.897 | 11.954 | 14.842 | 10.973 | 21.312 |
| 26 | 0.3076 | 14.185 | 16.238 | 10.773 | 7.649  | 16.570 |
| 26 | 0.3086 | 19.833 | 18.266 | 18.692 | 11.679 | 22.990 |
| 26 | 0.3096 | 21.822 | 11.484 | 17.863 | 12.638 | 22.961 |
| 26 | 0.3106 | 10.311 | 12.448 | 11.385 | 9.608  | 21.345 |
| 26 | 0.3116 | 25.244 | 25.248 | 24.108 | 10.193 | 23.770 |
| 26 | 0.3126 | 27.572 | 28.920 | 28.169 | 14.873 | 26.671 |
| 26 | 0.3136 | 27.690 | 27.365 | 24.945 | 12.738 | 22.225 |
| 26 | 0.3146 | 21.968 | 21.912 | 17.496 | 13.705 | 24.273 |
| 26 | 0.3156 | 14.738 | 14.158 | 10.136 | 7.573  | 21.544 |
| 26 | 0.3166 | 18.710 | 17.776 | 16.843 | 5.405  | 26.189 |
| 26 | 0.3176 | 16.401 | 21.692 | 19.646 | 13.316 | 11.155 |
| 26 | 0.3186 | 9.747  | 11.095 | 12.616 | 14.785 | 21.565 |
| 26 | 0.3196 | 11.392 | 13.742 | 6.636  | 8.653  | 10.798 |
| 26 | 0.3206 | 29.328 | 20.848 | 23.752 | 14.693 | 18.309 |
| 26 | 0.3216 | 15.744 | 12.943 | 11.767 | 8.122  | 16.320 |
| 26 | 0.3226 | 15.054 | 7.452  | 9.943  | 15.030 | 18.610 |
| 26 | 0.3236 | 21.071 | 11.544 | 11.201 | 8.250  | 34.325 |
| 26 | 0.3246 | 19.621 | 13.833 | 14.182 | 5.385  | 21.798 |
| 26 | 0.3256 | 29.100 | 20.308 | 19.340 | 12.102 | 29.360 |
| 26 | 0.3266 | 30.810 | 27.937 | 24.489 | 13.199 | 14.556 |
| 26 | 0.3276 | 12.667 | 9.602  | 10.981 | 11.867 | 24.384 |
| 26 | 0.3286 | 14.845 | 9.017  | 10.500 | 10.925 | 11.089 |
| 26 | 0.3296 | 30.423 | 19.124 | 20.909 | 11.371 | 19.320 |
| 26 | 0.3306 | 25.971 | 14.091 | 17.614 | 10.152 | 26.926 |
| 26 | 0.3316 | 16.145 | 11.454 | 17.181 | 8.156  | 9.766  |
| 26 | 0.3326 | 15.638 | 10.300 | 7.155  | 11.640 | 22.542 |
| 26 | 0.3336 | 12.800 | 7.423  | 6.900  | 15.902 | 21.445 |
| 26 | 0.3346 | 16.727 | 10.601 | 11.285 | 19.537 | 24.783 |
| 26 | 0.3356 | 15.372 | 9.259  | 8.845  | 10.105 | 20.421 |
| 26 | 0.3366 | 13.186 | 11.741 | 16.504 | 18.838 | 28.511 |
| 26 | 0.3376 | 20.841 | 20.756 | 19.117 | 9.426  | 25.328 |
| 26 | 0.3386 | 22.268 | 12.908 | 15.067 | 9.699  | 21.068 |
| 26 | 0.3396 | 16.852 | 14.012 | 11.761 | 16.397 | 19.231 |
| 26 | 0.3406 | 20.300 | 8.666  | 13.791 | 11.078 | 17.227 |



|    |        |        |        |        |        |        |
|----|--------|--------|--------|--------|--------|--------|
| 26 | 0.3416 | 25.320 | 19.820 | 26.530 | 21.092 | 20.792 |
| 26 | 0.3426 | 22.253 | 12.652 | 14.093 | 7.082  | 9.687  |
| 26 | 0.3436 | 20.637 | 12.070 | 13.859 | 14.589 | 23.461 |
| 26 | 0.3446 | 14.309 | 8.159  | 15.593 | 13.541 | 20.930 |
| 26 | 0.3456 | 25.393 | 12.962 | 19.238 | 6.192  | 29.946 |
| 26 | 0.3466 | 24.222 | 11.066 | 14.978 | 10.850 | 32.600 |
| 26 | 0.3476 | 25.483 | 17.867 | 18.651 | 9.984  | 34.445 |
| 26 | 0.3486 | 27.445 | 17.684 | 14.417 | 14.473 | 19.801 |
| 26 | 0.3496 | 23.137 | 19.773 | 22.647 | 17.526 | 19.436 |
| 26 | 0.3506 | 18.515 | 13.910 | 16.254 | 9.652  | 28.150 |
| 26 | 0.3516 | 10.172 | 9.513  | 12.183 | 13.511 | 16.378 |
| 26 | 0.3526 | 24.294 | 13.558 | 17.106 | 10.982 | 18.421 |
| 26 | 0.3536 | 20.861 | 15.173 | 8.658  | 16.923 | 26.384 |
| 26 | 0.3546 | 14.929 | 7.727  | 9.462  | 12.757 | 25.417 |
| 26 | 0.3556 | 34.252 | 29.071 | 27.182 | 12.913 | 29.437 |
| 26 | 0.3566 | 25.370 | 17.897 | 20.109 | 16.183 | 24.774 |
| 26 | 0.3576 | 20.220 | 5.102  | 12.865 | 13.607 | 20.585 |
| 26 | 0.3586 | 20.211 | 14.283 | 19.325 | 15.247 | 19.094 |
| 26 | 0.3596 | 18.998 | 12.421 | 14.844 | 16.453 | 21.993 |
| 26 | 0.3606 | 6.063  | 6.823  | 6.980  | 6.740  | 9.930  |
| 26 | 0.3616 | 12.013 | 8.098  | 8.532  | 16.838 | 10.311 |
| 26 | 0.3626 | 13.315 | 9.059  | 11.805 | 18.660 | 11.382 |
| 26 | 0.3636 | 11.636 | 7.034  | 5.804  | 17.065 | 14.927 |
| 26 | 0.3646 | 10.041 | 10.658 | 13.153 | 13.059 | 13.527 |
| 26 | 0.3656 | 12.074 | 12.517 | 19.716 | 12.103 | 15.027 |
| 26 | 0.3666 | 12.580 | 9.902  | 15.972 | 12.387 | 19.223 |
| 26 | 0.3676 | 24.561 | 22.330 | 28.614 | 14.490 | 18.689 |
| 26 | 0.3686 | 15.893 | 7.161  | 14.823 | 15.125 | 13.324 |
| 26 | 0.3696 | 15.742 | 15.154 | 17.755 | 15.560 | 19.924 |
| 26 | 0.3706 | 16.098 | 14.611 | 12.774 | 14.566 | 25.103 |
| 26 | 0.3716 | 15.260 | 7.320  | 12.845 | 11.291 | 15.048 |
| 26 | 0.3726 | 22.292 | 13.471 | 18.227 | 15.955 | 20.551 |
| 26 | 0.3736 | 15.810 | 4.288  | 3.570  | 8.913  | 10.064 |
| 26 | 0.3746 | 25.188 | 19.902 | 20.889 | 10.489 | 7.564  |
| 26 | 0.3756 | 20.464 | 17.279 | 19.120 | 22.429 | 29.797 |
| 26 | 0.3766 | 12.390 | 15.328 | 11.932 | 30.498 | 28.597 |
| 26 | 0.3776 | 15.149 | 21.236 | 14.774 | 20.535 | 15.511 |
| 26 | 0.3786 | 18.265 | 17.741 | 14.235 | 26.788 | 17.539 |
| 26 | 0.3796 | 21.162 | 11.782 | 13.818 | 29.175 | 19.591 |
| 26 | 0.3806 | 32.146 | 16.323 | 15.689 | 20.725 | 13.649 |
| 26 | 0.3816 | 20.012 | 14.564 | 17.971 | 25.631 | 16.342 |
| 26 | 0.3826 | 12.879 | 7.936  | 14.476 | 9.639  | 18.600 |
| 26 | 0.3836 | 42.084 | 19.570 | 24.194 | 24.562 | 11.760 |
| 26 | 0.3846 | 18.345 | 15.228 | 20.810 | 17.257 | 18.051 |
| 26 | 0.3856 | 14.248 | 15.269 | 13.827 | 18.456 | 11.244 |
| 26 | 0.3866 | 19.275 | 14.617 | 16.726 | 25.166 | 26.804 |
| 26 | 0.3876 | 16.925 | 8.892  | 9.272  | 16.572 | 20.687 |
| 26 | 0.3886 | 20.460 | 4.834  | 10.082 | 16.211 | 16.520 |
| 26 | 0.3896 | 18.418 | 9.395  | 11.243 | 9.597  | 19.552 |
| 26 | 0.3906 | 17.598 | 13.240 | 13.083 | 8.164  | 13.207 |

|    |        |        |        |        |        |        |
|----|--------|--------|--------|--------|--------|--------|
| 26 | 0.3916 | 10.677 | 8.264  | 6.520  | 10.924 | 9.052  |
| 26 | 0.3926 | 8.148  | 9.080  | 8.931  | 12.022 | 10.558 |
| 26 | 0.3936 | 7.141  | 6.187  | 7.153  | 12.236 | 13.824 |
| 26 | 0.3946 | 25.570 | 10.205 | 19.690 | 8.958  | 19.253 |
| 26 | 0.3956 | 24.272 | 15.451 | 19.385 | 12.691 | 21.942 |
| 26 | 0.3966 | 25.266 | 16.016 | 24.849 | 11.879 | 28.525 |
| 26 | 0.3976 | 17.534 | 9.623  | 12.359 | 17.464 | 26.582 |
| 26 | 0.3986 | 22.512 | 18.012 | 16.656 | 10.941 | 29.345 |
| 26 | 0.3996 | 18.098 | 17.276 | 17.852 | 6.677  | 27.054 |
| 26 | 0.4006 | 17.985 | 18.855 | 17.232 | 8.669  | 19.800 |
| 26 | 0.4016 | 25.802 | 22.339 | 21.342 | 8.937  | 13.381 |
| 26 | 0.4026 | 14.179 | 7.802  | 7.507  | 7.360  | 18.424 |
| 26 | 0.4036 | 8.061  | 7.775  | 7.182  | 10.093 | 12.706 |
| 26 | 0.4046 | 13.676 | 10.500 | 14.209 | 14.229 | 18.750 |
| 26 | 0.4056 | 21.408 | 12.854 | 16.227 | 20.170 | 25.973 |
| 26 | 0.4066 | 19.793 | 23.154 | 18.880 | 18.329 | 18.775 |
| 26 | 0.4076 | 18.720 | 12.876 | 9.623  | 14.932 | 19.770 |
| 26 | 0.4086 | 12.557 | 6.112  | 8.190  | 10.695 | 16.871 |
| 26 | 0.4096 | 20.417 | 13.990 | 13.769 | 14.156 | 22.122 |
| 26 | 0.4106 | 20.034 | 15.436 | 16.877 | 15.380 | 28.726 |
| 26 | 0.4116 | 20.557 | 11.430 | 20.791 | 13.252 | 11.185 |
| 26 | 0.4126 | 20.651 | 11.055 | 21.879 | 11.942 | 15.147 |
| 26 | 0.4136 | 27.298 | 25.813 | 25.724 | 7.982  | 12.164 |
| 26 | 0.4146 | 29.275 | 27.947 | 26.247 | 9.638  | 16.475 |
| 26 | 0.4156 | 25.458 | 11.442 | 16.042 | 6.145  | 14.248 |
| 26 | 0.4166 | 26.845 | 14.368 | 23.651 | 10.135 | 18.918 |
| 26 | 0.4176 | 25.879 | 15.184 | 23.480 | 15.254 | 25.820 |
| 26 | 0.4186 | 24.975 | 14.523 | 22.533 | 24.709 | 24.970 |
| 26 | 0.4196 | 24.964 | 14.522 | 22.549 | 24.704 | 24.976 |
| 26 | 0.4206 | 24.951 | 14.520 | 22.565 | 24.705 | 24.983 |
| 26 | 0.4216 | 29.304 | 14.063 | 14.791 | 11.045 | 22.692 |
| 26 | 0.4226 | 21.022 | 7.082  | 9.980  | 16.813 | 24.743 |
| 26 | 0.4236 | 22.313 | 9.839  | 12.794 | 14.996 | 25.991 |
| 26 | 0.4246 | 19.472 | 14.338 | 14.232 | 9.772  | 23.217 |
| 26 | 0.4256 | 4.884  | 5.984  | 5.409  | 15.388 | 15.794 |
| 26 | 0.4266 | 16.722 | 16.532 | 23.036 | 16.838 | 16.265 |
| 26 | 0.4276 | 23.379 | 11.971 | 16.037 | 18.050 | 21.610 |
| 26 | 0.4286 | 39.975 | 19.584 | 27.707 | 18.070 | 20.255 |
| 26 | 0.4296 | 39.985 | 19.599 | 27.718 | 17.915 | 20.212 |
| 26 | 0.4306 | 25.863 | 23.577 | 23.334 | 19.080 | 37.094 |
| 26 | 0.4316 | 26.805 | 22.778 | 26.803 | 14.414 | 24.036 |
| 26 | 0.4326 | 17.000 | 10.485 | 9.247  | 16.073 | 21.110 |
| 26 | 0.4336 | 23.440 | 12.267 | 18.875 | 19.492 | 23.193 |
| 26 | 0.4346 | 28.946 | 15.190 | 20.279 | 17.723 | 23.371 |
| 26 | 0.4356 | 39.946 | 14.672 | 34.498 | 22.776 | 28.000 |
| 26 | 0.4366 | 26.488 | 12.617 | 9.649  | 15.554 | 24.076 |
| 26 | 0.4376 | 22.073 | 15.580 | 13.668 | 17.062 | 23.740 |
| 26 | 0.4386 | 23.078 | 15.249 | 20.815 | 14.892 | 28.899 |
| 26 | 0.4396 | 28.072 | 18.677 | 29.130 | 23.810 | 20.076 |
| 26 | 0.4406 | 27.356 | 16.222 | 17.837 | 23.285 | 30.965 |

|    |        |        |        |        |        |        |
|----|--------|--------|--------|--------|--------|--------|
| 26 | 0.4416 | 28.664 | 9.031  | 16.614 | 21.148 | 27.650 |
| 26 | 0.4426 | 27.956 | 15.145 | 18.301 | 8.429  | 20.776 |
| 26 | 0.4436 | 20.768 | 12.607 | 15.531 | 13.939 | 35.211 |
| 26 | 0.4446 | 23.803 | 25.598 | 20.865 | 18.336 | 16.421 |
| 26 | 0.4456 | 25.694 | 26.582 | 20.726 | 6.241  | 18.937 |
| 26 | 0.4466 | 27.918 | 25.691 | 25.712 | 6.188  | 16.742 |
| 26 | 0.4476 | 21.450 | 20.232 | 17.796 | 14.871 | 17.344 |
| 26 | 0.4486 | 7.896  | 8.943  | 9.009  | 5.523  | 14.189 |
| 26 | 0.4496 | 6.454  | 7.024  | 4.987  | 8.783  | 7.222  |
| 26 | 0.4506 | 8.681  | 6.764  | 8.005  | 6.498  | 14.101 |
| 26 | 0.4516 | 29.432 | 16.889 | 25.701 | 10.040 | 17.816 |
| 26 | 0.4526 | 24.226 | 16.062 | 21.040 | 4.931  | 13.175 |
| 26 | 0.4536 | 8.799  | 4.034  | 6.781  | 7.996  | 35.072 |
| 26 | 0.4546 | 12.565 | 14.787 | 15.171 | 15.777 | 9.272  |
| 26 | 0.4556 | 40.840 | 27.811 | 36.371 | 10.450 | 11.815 |
| 26 | 0.4566 | 25.410 | 15.856 | 22.818 | 9.881  | 18.297 |
| 26 | 0.4576 | 18.203 | 19.138 | 22.402 | 9.182  | 21.940 |
| 26 | 0.4586 | 6.153  | 9.013  | 11.551 | 8.641  | 28.965 |
| 26 | 0.4596 | 33.111 | 24.490 | 28.509 | 13.056 | 25.116 |
| 26 | 0.4606 | 19.516 | 22.687 | 17.339 | 11.960 | 16.982 |
| 26 | 0.4616 | 29.129 | 22.083 | 28.700 | 16.920 | 30.674 |
| 26 | 0.4626 | 20.702 | 10.793 | 11.354 | 8.741  | 18.248 |
| 26 | 0.4636 | 16.640 | 18.492 | 12.967 | 8.367  | 7.674  |
| 26 | 0.4646 | 16.660 | 17.855 | 12.466 | 11.271 | 21.188 |
| 26 | 0.4656 | 15.736 | 8.332  | 11.552 | 4.566  | 20.541 |
| 26 | 0.4666 | 24.316 | 15.105 | 19.951 | 7.597  | 20.107 |
| 26 | 0.4676 | 40.879 | 28.553 | 33.279 | 21.376 | 24.965 |
| 26 | 0.4686 | 41.085 | 28.128 | 33.880 | 21.828 | 24.890 |
| 26 | 0.4696 | 27.825 | 20.404 | 23.502 | 27.117 | 24.273 |
| 26 | 0.4706 | 23.959 | 16.598 | 18.560 | 14.765 | 25.722 |
| 26 | 0.4716 | 21.361 | 19.854 | 16.854 | 26.024 | 26.465 |
| 26 | 0.4726 | 24.901 | 9.750  | 16.564 | 13.186 | 17.794 |
| 26 | 0.4736 | 21.457 | 9.286  | 17.576 | 11.636 | 20.014 |
| 26 | 0.4746 | 21.133 | 14.453 | 22.418 | 20.861 | 23.589 |
| 26 | 0.4756 | 34.450 | 27.068 | 31.267 | 34.805 | 21.826 |
| 26 | 0.4766 | 18.735 | 2.811  | 17.626 | 23.027 | 19.360 |
| 26 | 0.4776 | 26.792 | 14.696 | 27.654 | 20.683 | 17.673 |
| 26 | 0.4786 | 35.793 | 19.724 | 26.298 | 17.141 | 20.773 |
| 26 | 0.4796 | 23.161 | 22.023 | 15.859 | 12.239 | 14.071 |
| 26 | 0.4806 | 31.651 | 33.886 | 31.571 | 26.971 | 21.074 |
| 26 | 0.4816 | 26.236 | 19.264 | 22.247 | 16.345 | 20.209 |
| 26 | 0.4826 | 14.728 | 9.733  | 12.985 | 14.311 | 21.113 |
| 26 | 0.4836 | 18.742 | 10.153 | 19.138 | 14.954 | 21.786 |
| 26 | 0.4846 | 11.351 | 8.022  | 13.685 | 8.716  | 20.284 |
| 26 | 0.4856 | 17.490 | 10.882 | 16.131 | 10.915 | 19.166 |
| 26 | 0.4866 | 18.815 | 6.397  | 13.882 | 19.634 | 30.129 |
| 26 | 0.4876 | 14.804 | 9.828  | 12.608 | 20.636 | 36.068 |
| 26 | 0.4886 | 5.498  | 9.541  | 8.212  | 19.997 | 14.968 |
| 26 | 0.4896 | 15.119 | 14.121 | 13.411 | 26.375 | 16.898 |
| 26 | 0.4906 | 35.066 | 23.631 | 27.690 | 27.050 | 24.859 |

|    |        |        |        |        |        |        |
|----|--------|--------|--------|--------|--------|--------|
| 26 | 0.4916 | 23.090 | 17.371 | 18.122 | 20.232 | 17.076 |
| 26 | 0.4926 | 22.303 | 12.383 | 23.896 | 10.006 | 7.912  |
| 26 | 0.4936 | 28.466 | 21.933 | 27.489 | 11.516 | 16.070 |
| 26 | 0.4946 | 23.057 | 17.570 | 19.378 | 15.777 | 18.980 |
| 26 | 0.4956 | 27.011 | 13.789 | 20.382 | 20.019 | 18.284 |
| 26 | 0.4966 | 24.392 | 7.881  | 15.669 | 25.675 | 20.736 |
| 26 | 0.4976 | 18.789 | 7.235  | 15.038 | 15.792 | 12.553 |
| 26 | 0.4986 | 16.687 | 16.745 | 19.057 | 22.164 | 8.377  |
| 26 | 0.4996 | 13.697 | 10.109 | 16.178 | 14.515 | 11.412 |
| 26 | 0.5006 | 13.693 | 10.106 | 16.175 | 14.517 | 11.413 |
| 26 | 0.5016 | 0.000  | 0.000  | 0.000  | 0.000  | 0.000  |
| 27 | 0.0020 | 0.000  | 0.000  | 0.000  | 0.000  | 0.000  |
| 27 | 0.0030 | 13.017 | 6.656  | 11.348 | 12.621 | 18.271 |
| 27 | 0.0040 | 9.662  | 12.244 | 8.978  | 24.501 | 23.572 |
| 27 | 0.0050 | 3.566  | 7.368  | 3.462  | 4.689  | 7.351  |
| 27 | 0.0060 | 7.850  | 5.122  | 6.217  | 5.384  | 13.528 |
| 27 | 0.0070 | 14.158 | 7.521  | 11.114 | 15.128 | 16.324 |
| 27 | 0.0080 | 11.664 | 10.525 | 8.591  | 10.938 | 20.434 |
| 27 | 0.0090 | 25.022 | 18.580 | 21.880 | 11.094 | 12.579 |
| 27 | 0.0100 | 12.551 | 11.665 | 10.444 | 19.981 | 20.258 |
| 27 | 0.0110 | 15.370 | 13.742 | 15.110 | 13.738 | 12.367 |
| 27 | 0.0120 | 14.516 | 12.153 | 13.556 | 9.077  | 12.533 |
| 27 | 0.0130 | 24.290 | 16.533 | 13.331 | 12.409 | 26.074 |
| 27 | 0.0140 | 16.356 | 14.591 | 12.646 | 7.327  | 12.442 |
| 27 | 0.0150 | 11.032 | 10.360 | 10.145 | 14.948 | 12.527 |
| 27 | 0.0160 | 15.669 | 16.305 | 17.651 | 9.969  | 15.054 |
| 27 | 0.0170 | 24.751 | 10.701 | 23.617 | 15.954 | 16.571 |
| 27 | 0.0180 | 13.000 | 13.160 | 11.200 | 7.815  | 6.439  |
| 27 | 0.0190 | 13.933 | 14.420 | 12.718 | 12.676 | 16.322 |
| 27 | 0.0200 | 13.758 | 15.772 | 12.330 | 9.406  | 11.809 |
| 27 | 0.0210 | 9.563  | 8.213  | 9.693  | 7.277  | 25.240 |
| 27 | 0.0220 | 7.324  | 10.097 | 10.586 | 8.702  | 13.536 |
| 27 | 0.0230 | 6.719  | 9.943  | 10.091 | 10.720 | 19.464 |
| 27 | 0.0240 | 14.303 | 12.452 | 13.110 | 10.636 | 15.573 |
| 27 | 0.0250 | 17.842 | 17.984 | 17.847 | 9.815  | 14.665 |
| 27 | 0.0260 | 18.496 | 15.323 | 15.613 | 17.250 | 12.409 |
| 27 | 0.0270 | 13.265 | 14.128 | 12.665 | 14.340 | 9.880  |
| 27 | 0.0280 | 17.187 | 21.140 | 18.841 | 11.199 | 14.848 |
| 27 | 0.0290 | 12.341 | 19.685 | 15.452 | 15.008 | 19.321 |
| 27 | 0.0300 | 10.588 | 19.702 | 10.953 | 19.046 | 7.932  |
| 27 | 0.0310 | 8.453  | 12.170 | 9.666  | 13.965 | 13.534 |
| 27 | 0.0320 | 8.393  | 13.990 | 7.203  | 8.716  | 24.870 |
| 27 | 0.0330 | 10.448 | 7.936  | 5.996  | 17.726 | 34.180 |
| 27 | 0.0340 | 7.844  | 11.003 | 5.820  | 18.067 | 28.391 |
| 27 | 0.0350 | 7.735  | 5.654  | 3.389  | 13.480 | 23.830 |
| 27 | 0.0360 | 5.013  | 3.652  | 4.197  | 17.120 | 29.537 |
| 27 | 0.0370 | 12.343 | 11.355 | 9.024  | 23.054 | 26.506 |
| 27 | 0.0380 | 7.570  | 7.586  | 5.946  | 17.371 | 6.562  |
| 27 | 0.0390 | 4.062  | 10.966 | 4.265  | 20.064 | 5.168  |
| 27 | 0.0400 | 17.401 | 8.462  | 11.337 | 18.270 | 4.731  |

|    |        |        |        |        |        |        |
|----|--------|--------|--------|--------|--------|--------|
| 27 | 0.0410 | 27.113 | 34.577 | 25.204 | 22.064 | 15.022 |
| 27 | 0.0420 | 13.633 | 27.769 | 14.584 | 22.952 | 14.153 |
| 27 | 0.0430 | 12.645 | 18.610 | 11.692 | 19.734 | 17.105 |
| 27 | 0.0440 | 10.897 | 10.085 | 10.214 | 20.070 | 9.812  |
| 27 | 0.0450 | 15.388 | 15.716 | 14.425 | 15.929 | 15.589 |
| 27 | 0.0460 | 9.271  | 19.505 | 7.803  | 17.220 | 15.529 |
| 27 | 0.0470 | 9.130  | 8.451  | 7.717  | 10.394 | 14.625 |
| 27 | 0.0480 | 12.152 | 11.942 | 9.936  | 10.757 | 8.409  |
| 27 | 0.0490 | 9.934  | 10.660 | 7.450  | 18.448 | 20.427 |
| 27 | 0.0500 | 12.186 | 15.684 | 9.325  | 14.986 | 19.420 |
| 27 | 0.0510 | 20.504 | 14.731 | 16.282 | 13.248 | 10.546 |
| 27 | 0.0520 | 23.402 | 15.420 | 20.242 | 18.404 | 12.957 |
| 27 | 0.0530 | 28.897 | 19.625 | 18.619 | 7.869  | 17.215 |
| 27 | 0.0540 | 16.407 | 14.674 | 12.077 | 10.474 | 16.990 |
| 27 | 0.0550 | 20.773 | 17.725 | 12.340 | 18.372 | 13.026 |
| 27 | 0.0560 | 6.505  | 10.527 | 4.876  | 12.913 | 10.191 |
| 27 | 0.0570 | 12.989 | 14.803 | 15.723 | 13.372 | 16.435 |
| 27 | 0.0580 | 9.677  | 12.069 | 8.605  | 18.077 | 17.118 |
| 27 | 0.0590 | 14.403 | 11.817 | 12.354 | 10.786 | 9.523  |
| 27 | 0.0600 | 15.561 | 7.457  | 9.870  | 19.804 | 17.099 |
| 27 | 0.0610 | 11.971 | 19.381 | 15.221 | 18.283 | 8.278  |
| 27 | 0.0620 | 13.885 | 24.592 | 19.585 | 16.207 | 7.880  |
| 27 | 0.0630 | 10.594 | 18.847 | 15.749 | 23.594 | 13.005 |
| 27 | 0.0640 | 22.856 | 22.467 | 19.102 | 16.603 | 9.455  |
| 27 | 0.0650 | 11.893 | 16.829 | 10.958 | 13.988 | 18.846 |
| 27 | 0.0660 | 24.471 | 20.129 | 16.973 | 23.685 | 12.955 |
| 27 | 0.0670 | 18.332 | 10.509 | 14.254 | 30.064 | 19.058 |
| 27 | 0.0680 | 22.788 | 25.999 | 23.791 | 21.398 | 22.867 |
| 27 | 0.0690 | 15.058 | 27.150 | 19.197 | 7.784  | 8.831  |
| 27 | 0.0700 | 8.831  | 18.068 | 11.795 | 9.197  | 7.100  |
| 27 | 0.0710 | 6.440  | 11.376 | 9.391  | 11.357 | 10.503 |
| 27 | 0.0720 | 8.757  | 11.490 | 8.525  | 7.102  | 13.981 |
| 27 | 0.0730 | 6.427  | 12.676 | 8.124  | 1.306  | 4.804  |
| 27 | 0.0740 | 26.822 | 19.910 | 22.533 | 18.627 | 15.831 |
| 27 | 0.0750 | 15.456 | 15.274 | 17.607 | 14.344 | 9.911  |
| 27 | 0.0760 | 11.776 | 20.864 | 16.253 | 20.557 | 17.493 |
| 27 | 0.0770 | 11.173 | 13.223 | 11.425 | 19.728 | 7.874  |
| 27 | 0.0780 | 14.855 | 9.348  | 10.731 | 7.510  | 9.866  |
| 27 | 0.0790 | 11.157 | 11.606 | 9.521  | 8.504  | 11.451 |
| 27 | 0.0800 | 20.261 | 23.638 | 17.483 | 19.073 | 16.808 |
| 27 | 0.0810 | 14.820 | 11.117 | 13.530 | 6.377  | 12.842 |
| 27 | 0.0820 | 13.173 | 17.493 | 12.202 | 12.125 | 8.687  |
| 27 | 0.0830 | 15.173 | 17.056 | 11.528 | 15.781 | 14.344 |
| 27 | 0.0840 | 14.625 | 15.555 | 12.987 | 12.042 | 10.671 |
| 27 | 0.0850 | 6.557  | 5.644  | 5.834  | 7.287  | 3.542  |
| 27 | 0.0860 | 16.423 | 15.741 | 12.761 | 13.973 | 6.696  |
| 27 | 0.0870 | 11.817 | 12.421 | 8.136  | 16.602 | 10.524 |
| 27 | 0.0880 | 4.729  | 13.505 | 10.027 | 20.562 | 13.906 |
| 27 | 0.0890 | 2.647  | 11.453 | 7.136  | 19.923 | 8.730  |
| 27 | 0.0900 | 6.926  | 17.427 | 8.032  | 18.232 | 7.960  |

|    |        |        |        |        |        |        |
|----|--------|--------|--------|--------|--------|--------|
| 27 | 0.0910 | 10.447 | 13.561 | 7.527  | 10.413 | 15.048 |
| 27 | 0.0920 | 5.279  | 9.786  | 4.376  | 10.567 | 8.177  |
| 27 | 0.0930 | 15.183 | 12.734 | 9.614  | 13.626 | 7.687  |
| 27 | 0.0940 | 7.594  | 11.394 | 6.813  | 15.800 | 13.153 |
| 27 | 0.0950 | 7.544  | 17.682 | 11.720 | 28.892 | 6.679  |
| 27 | 0.0960 | 7.161  | 10.599 | 7.445  | 30.044 | 17.292 |
| 27 | 0.0970 | 6.892  | 9.153  | 5.990  | 18.145 | 14.673 |
| 27 | 0.0980 | 22.091 | 12.860 | 20.643 | 18.457 | 12.048 |
| 27 | 0.0990 | 12.237 | 10.138 | 12.382 | 15.635 | 10.379 |
| 27 | 0.1000 | 13.728 | 9.061  | 8.108  | 14.781 | 18.618 |
| 27 | 0.1010 | 10.939 | 15.371 | 11.614 | 13.255 | 6.235  |
| 27 | 0.1020 | 6.939  | 7.279  | 6.402  | 11.576 | 6.232  |
| 27 | 0.1030 | 16.769 | 12.381 | 11.350 | 8.495  | 19.442 |
| 27 | 0.1040 | 5.630  | 5.688  | 3.670  | 10.517 | 17.176 |
| 27 | 0.1050 | 4.847  | 4.977  | 3.464  | 11.124 | 8.461  |
| 27 | 0.1060 | 4.502  | 3.713  | 2.649  | 10.028 | 13.464 |
| 27 | 0.1070 | 8.946  | 6.929  | 6.732  | 14.755 | 11.966 |
| 27 | 0.1080 | 11.361 | 7.936  | 9.984  | 13.251 | 13.027 |
| 27 | 0.1090 | 12.865 | 15.418 | 13.844 | 9.528  | 15.317 |
| 27 | 0.1100 | 12.794 | 15.184 | 14.530 | 12.637 | 14.155 |
| 27 | 0.1110 | 10.861 | 13.072 | 12.248 | 17.673 | 9.786  |
| 27 | 0.1120 | 16.964 | 17.811 | 12.236 | 26.683 | 9.547  |
| 27 | 0.1130 | 12.242 | 12.267 | 15.539 | 10.388 | 9.551  |
| 27 | 0.1140 | 11.854 | 18.928 | 13.100 | 12.978 | 12.874 |
| 27 | 0.1150 | 21.793 | 10.156 | 16.859 | 10.677 | 14.988 |
| 27 | 0.1160 | 19.404 | 10.838 | 13.464 | 18.195 | 15.275 |
| 27 | 0.1170 | 8.488  | 11.970 | 9.862  | 14.887 | 10.329 |
| 27 | 0.1180 | 6.433  | 9.607  | 9.891  | 13.048 | 7.034  |
| 27 | 0.1190 | 18.145 | 15.402 | 18.709 | 14.892 | 10.463 |
| 27 | 0.1200 | 14.642 | 14.915 | 17.879 | 21.525 | 9.036  |
| 27 | 0.1210 | 16.858 | 16.104 | 17.765 | 3.915  | 10.175 |
| 27 | 0.1220 | 14.091 | 11.390 | 9.553  | 7.187  | 12.946 |
| 27 | 0.1230 | 7.326  | 8.429  | 7.115  | 10.034 | 7.939  |
| 27 | 0.1240 | 4.765  | 4.162  | 4.510  | 3.510  | 9.434  |
| 27 | 0.1250 | 19.019 | 10.506 | 11.574 | 11.065 | 15.891 |
| 27 | 0.1260 | 13.553 | 10.083 | 11.822 | 16.286 | 8.806  |
| 27 | 0.1270 | 11.633 | 18.215 | 13.153 | 23.964 | 9.055  |
| 27 | 0.1280 | 13.566 | 15.120 | 12.065 | 26.849 | 13.075 |
| 27 | 0.1290 | 26.339 | 25.163 | 20.058 | 15.319 | 14.152 |
| 27 | 0.1300 | 15.257 | 18.593 | 6.216  | 22.571 | 11.767 |
| 27 | 0.1310 | 11.363 | 11.279 | 6.301  | 10.968 | 7.520  |
| 27 | 0.1320 | 14.065 | 13.273 | 8.755  | 11.451 | 5.628  |
| 27 | 0.1330 | 25.086 | 18.314 | 18.360 | 8.453  | 15.533 |
| 27 | 0.1340 | 16.898 | 16.079 | 18.829 | 6.699  | 9.942  |
| 27 | 0.1350 | 18.512 | 16.896 | 22.951 | 12.561 | 14.059 |
| 27 | 0.1360 | 17.289 | 16.075 | 18.258 | 12.264 | 8.639  |
| 27 | 0.1370 | 9.844  | 8.080  | 8.833  | 6.828  | 5.351  |
| 27 | 0.1380 | 16.925 | 14.341 | 15.464 | 8.924  | 8.634  |
| 27 | 0.1390 | 11.423 | 9.022  | 15.635 | 6.478  | 8.426  |
| 27 | 0.1400 | 9.971  | 13.756 | 9.585  | 3.207  | 2.062  |

|    |        |        |        |        |        |        |
|----|--------|--------|--------|--------|--------|--------|
| 27 | 0.1410 | 18.936 | 14.040 | 15.333 | 8.880  | 10.970 |
| 27 | 0.1420 | 18.807 | 19.407 | 20.829 | 19.828 | 6.507  |
| 27 | 0.1430 | 14.280 | 18.553 | 11.935 | 15.921 | 19.042 |
| 27 | 0.1440 | 24.597 | 17.846 | 19.932 | 15.662 | 5.660  |
| 27 | 0.1450 | 20.826 | 22.202 | 17.466 | 14.010 | 4.969  |
| 27 | 0.1460 | 16.111 | 15.817 | 16.474 | 13.340 | 16.798 |
| 27 | 0.1470 | 22.747 | 18.770 | 12.748 | 13.409 | 15.013 |
| 27 | 0.1480 | 18.902 | 20.519 | 17.934 | 12.779 | 10.138 |
| 27 | 0.1490 | 10.408 | 16.067 | 12.209 | 17.406 | 5.056  |
| 27 | 0.1500 | 9.677  | 11.717 | 11.055 | 15.766 | 3.973  |
| 27 | 0.1510 | 12.292 | 16.913 | 14.449 | 16.215 | 11.765 |
| 27 | 0.1520 | 12.175 | 15.580 | 12.389 | 17.372 | 12.264 |
| 27 | 0.1530 | 19.491 | 24.450 | 21.321 | 21.620 | 15.290 |
| 27 | 0.1540 | 12.923 | 16.491 | 18.108 | 25.650 | 9.740  |
| 27 | 0.1550 | 24.811 | 22.725 | 20.782 | 27.832 | 11.797 |
| 27 | 0.1560 | 24.384 | 15.159 | 21.458 | 16.230 | 9.189  |
| 27 | 0.1570 | 23.792 | 25.773 | 19.922 | 21.392 | 13.068 |
| 27 | 0.1580 | 12.487 | 11.340 | 13.034 | 9.574  | 9.526  |
| 27 | 0.1590 | 20.899 | 18.352 | 16.656 | 15.212 | 13.287 |
| 27 | 0.1600 | 24.303 | 18.811 | 16.290 | 7.980  | 8.427  |
| 27 | 0.1610 | 15.029 | 12.282 | 10.898 | 17.793 | 14.285 |
| 27 | 0.1620 | 22.671 | 23.146 | 19.035 | 9.231  | 16.844 |
| 27 | 0.1630 | 18.197 | 22.605 | 15.126 | 10.123 | 20.729 |
| 27 | 0.1640 | 14.144 | 23.014 | 11.331 | 16.175 | 19.840 |
| 27 | 0.1650 | 17.657 | 15.845 | 11.968 | 13.796 | 8.898  |
| 27 | 0.1660 | 6.866  | 8.354  | 7.318  | 15.562 | 8.190  |
| 27 | 0.1670 | 5.141  | 10.098 | 10.083 | 8.262  | 7.882  |
| 27 | 0.1680 | 11.346 | 9.525  | 15.132 | 6.991  | 8.674  |
| 27 | 0.1690 | 12.525 | 10.010 | 12.098 | 11.610 | 26.619 |
| 27 | 0.1700 | 14.591 | 13.630 | 12.454 | 16.542 | 27.672 |
| 27 | 0.1710 | 23.766 | 22.879 | 23.957 | 14.506 | 10.475 |
| 27 | 0.1720 | 17.471 | 19.241 | 18.427 | 16.637 | 14.062 |
| 27 | 0.1730 | 17.458 | 19.246 | 18.433 | 16.722 | 14.048 |
| 27 | 0.1740 | 19.738 | 19.456 | 17.594 | 16.379 | 16.770 |
| 27 | 0.1750 | 15.763 | 14.847 | 13.743 | 8.397  | 6.573  |
| 27 | 0.1760 | 14.936 | 15.675 | 13.035 | 15.944 | 8.587  |
| 27 | 0.1770 | 16.466 | 12.213 | 15.997 | 18.148 | 10.419 |
| 27 | 0.1780 | 18.101 | 16.748 | 13.826 | 27.526 | 17.283 |
| 27 | 0.1790 | 22.663 | 12.696 | 19.182 | 12.482 | 12.511 |
| 27 | 0.1800 | 16.070 | 11.123 | 16.745 | 16.774 | 14.007 |
| 27 | 0.1810 | 17.136 | 16.574 | 18.762 | 17.716 | 19.783 |
| 27 | 0.1820 | 18.229 | 10.967 | 19.925 | 21.039 | 10.770 |
| 27 | 0.1830 | 24.301 | 29.724 | 20.384 | 32.386 | 19.099 |
| 27 | 0.1840 | 10.318 | 9.075  | 14.256 | 21.594 | 34.208 |
| 27 | 0.1850 | 23.151 | 22.875 | 21.983 | 20.725 | 25.505 |
| 27 | 0.1860 | 17.119 | 15.199 | 17.669 | 17.516 | 20.089 |
| 27 | 0.1870 | 15.852 | 13.346 | 16.051 | 22.514 | 17.176 |
| 27 | 0.1880 | 13.072 | 17.366 | 17.659 | 23.193 | 17.564 |
| 27 | 0.1890 | 18.833 | 17.766 | 20.790 | 16.637 | 7.669  |
| 27 | 0.1900 | 13.050 | 8.179  | 12.893 | 5.791  | 5.462  |

|    |        |        |        |        |        |        |
|----|--------|--------|--------|--------|--------|--------|
| 27 | 0.1910 | 14.289 | 16.364 | 16.619 | 9.636  | 4.108  |
| 27 | 0.1920 | 11.463 | 13.399 | 12.408 | 11.399 | 17.529 |
| 27 | 0.1930 | 16.486 | 14.258 | 15.959 | 7.135  | 18.066 |
| 27 | 0.1940 | 15.596 | 17.166 | 15.626 | 15.248 | 10.446 |
| 27 | 0.1950 | 10.057 | 10.840 | 11.276 | 13.405 | 5.843  |
| 27 | 0.1960 | 15.110 | 17.302 | 18.318 | 14.380 | 7.681  |
| 27 | 0.1970 | 18.489 | 17.244 | 14.536 | 21.584 | 13.664 |
| 27 | 0.1980 | 10.733 | 11.506 | 10.545 | 11.779 | 24.967 |
| 27 | 0.1990 | 12.343 | 17.204 | 13.620 | 18.005 | 22.984 |
| 27 | 0.2000 | 35.592 | 27.817 | 31.346 | 19.746 | 10.215 |
| 27 | 0.2010 | 32.054 | 20.655 | 26.094 | 8.331  | 21.173 |
| 27 | 0.2020 | 17.545 | 13.357 | 15.789 | 12.225 | 6.458  |
| 27 | 0.2030 | 26.472 | 23.861 | 22.110 | 18.892 | 20.089 |
| 27 | 0.2040 | 10.748 | 9.504  | 7.876  | 15.010 | 8.552  |
| 27 | 0.2050 | 11.572 | 11.236 | 14.171 | 14.001 | 5.035  |
| 27 | 0.2060 | 14.559 | 19.578 | 17.771 | 13.263 | 11.412 |
| 27 | 0.2070 | 25.949 | 18.195 | 17.554 | 12.698 | 14.119 |
| 27 | 0.2080 | 8.704  | 13.034 | 11.876 | 17.359 | 10.530 |
| 27 | 0.2090 | 10.941 | 17.161 | 9.254  | 14.795 | 22.236 |
| 27 | 0.2100 | 13.220 | 11.610 | 10.993 | 23.264 | 14.210 |
| 27 | 0.2110 | 7.988  | 9.639  | 11.491 | 12.154 | 14.769 |
| 27 | 0.2120 | 13.645 | 12.730 | 13.392 | 16.247 | 16.155 |
| 27 | 0.2130 | 11.393 | 10.338 | 14.105 | 15.947 | 10.980 |
| 27 | 0.2140 | 18.885 | 15.459 | 17.152 | 16.798 | 8.750  |
| 27 | 0.2150 | 8.979  | 9.851  | 11.305 | 16.146 | 7.754  |
| 27 | 0.2160 | 9.744  | 7.247  | 14.957 | 25.393 | 14.257 |
| 27 | 0.2170 | 16.494 | 18.768 | 12.881 | 16.716 | 11.562 |
| 27 | 0.2180 | 8.261  | 11.243 | 13.594 | 16.538 | 13.903 |
| 27 | 0.2190 | 22.713 | 27.228 | 20.616 | 20.098 | 12.332 |
| 27 | 0.2200 | 16.131 | 16.257 | 14.893 | 17.592 | 9.914  |
| 27 | 0.2210 | 7.769  | 8.401  | 11.231 | 9.857  | 15.486 |
| 27 | 0.2220 | 14.227 | 17.528 | 10.765 | 16.187 | 10.154 |
| 27 | 0.2230 | 9.605  | 11.438 | 11.499 | 23.392 | 10.946 |
| 27 | 0.2240 | 18.487 | 23.792 | 19.824 | 22.995 | 24.762 |
| 27 | 0.2250 | 14.080 | 16.651 | 16.689 | 13.374 | 13.190 |
| 27 | 0.2260 | 15.679 | 17.264 | 16.398 | 7.594  | 8.077  |
| 27 | 0.2270 | 22.301 | 15.988 | 19.461 | 12.785 | 8.874  |
| 27 | 0.2280 | 27.252 | 11.037 | 15.887 | 13.004 | 9.519  |
| 27 | 0.2290 | 19.243 | 6.517  | 13.575 | 15.694 | 19.465 |
| 27 | 0.2300 | 21.732 | 16.246 | 18.954 | 13.454 | 17.855 |
| 27 | 0.2310 | 14.603 | 13.336 | 12.468 | 22.375 | 16.312 |
| 27 | 0.2320 | 21.439 | 19.102 | 21.719 | 20.308 | 13.016 |
| 27 | 0.2330 | 7.463  | 10.184 | 11.510 | 4.486  | 5.134  |
| 27 | 0.2340 | 11.684 | 12.788 | 16.532 | 13.136 | 9.733  |
| 27 | 0.2350 | 17.905 | 17.193 | 24.145 | 18.522 | 10.521 |
| 27 | 0.2360 | 16.211 | 17.140 | 14.333 | 15.963 | 4.665  |
| 27 | 0.2370 | 5.742  | 13.267 | 10.010 | 20.809 | 20.379 |
| 27 | 0.2380 | 10.369 | 11.930 | 10.138 | 20.532 | 13.885 |
| 27 | 0.2390 | 10.299 | 11.892 | 10.107 | 20.381 | 13.902 |
| 27 | 0.2400 | 24.258 | 24.117 | 26.300 | 18.431 | 15.800 |



|    |        |        |        |        |        |        |
|----|--------|--------|--------|--------|--------|--------|
| 27 | 0.2410 | 24.108 | 24.036 | 26.164 | 18.168 | 15.850 |
| 27 | 0.2420 | 23.957 | 23.954 | 26.027 | 17.908 | 15.900 |
| 27 | 0.2430 | 9.344  | 8.052  | 8.660  | 6.423  | 19.900 |
| 27 | 0.2440 | 10.533 | 6.882  | 11.868 | 7.993  | 8.035  |
| 27 | 0.2450 | 8.340  | 7.812  | 11.508 | 10.846 | 9.172  |
| 27 | 0.2460 | 8.850  | 8.647  | 16.280 | 14.870 | 16.441 |
| 27 | 0.2470 | 7.033  | 9.238  | 13.289 | 18.639 | 12.539 |
| 27 | 0.2480 | 8.699  | 9.564  | 6.111  | 15.871 | 10.040 |
| 27 | 0.2490 | 12.217 | 9.567  | 11.252 | 17.448 | 7.433  |
| 27 | 0.2500 | 12.225 | 9.516  | 11.215 | 17.408 | 7.449  |
| 27 | 0.2510 | 11.970 | 11.163 | 8.130  | 20.890 | 10.133 |
| 27 | 0.2520 | 8.104  | 11.085 | 9.411  | 19.521 | 20.942 |
| 27 | 0.2530 | 11.599 | 9.089  | 7.503  | 23.930 | 16.921 |
| 27 | 0.2540 | 8.824  | 12.515 | 11.070 | 17.517 | 15.790 |
| 27 | 0.2550 | 8.931  | 12.605 | 11.166 | 17.394 | 15.931 |
| 27 | 0.2560 | 5.149  | 15.298 | 11.469 | 18.830 | 13.160 |
| 27 | 0.2570 | 5.444  | 8.067  | 10.655 | 8.799  | 13.623 |
| 27 | 0.2580 | 14.736 | 12.184 | 12.196 | 21.152 | 10.375 |
| 27 | 0.2590 | 10.275 | 11.559 | 13.474 | 20.618 | 12.278 |
| 27 | 0.2600 | 11.441 | 10.952 | 13.970 | 13.742 | 14.310 |
| 27 | 0.2610 | 12.543 | 15.208 | 10.393 | 23.390 | 11.966 |
| 27 | 0.2620 | 19.297 | 13.927 | 12.752 | 22.412 | 14.019 |
| 27 | 0.2630 | 19.531 | 14.146 | 12.985 | 22.368 | 14.075 |
| 27 | 0.2640 | 19.743 | 14.351 | 13.192 | 22.323 | 14.135 |
| 27 | 0.2650 | 25.856 | 14.032 | 18.399 | 22.541 | 19.686 |
| 27 | 0.2660 | 8.317  | 8.561  | 7.799  | 16.269 | 17.991 |
| 27 | 0.2670 | 15.189 | 19.120 | 21.215 | 13.417 | 14.477 |
| 27 | 0.2680 | 15.873 | 16.106 | 18.639 | 12.418 | 13.952 |
| 27 | 0.2690 | 13.493 | 15.297 | 21.528 | 13.835 | 11.444 |
| 27 | 0.2700 | 8.621  | 12.820 | 8.602  | 15.059 | 13.825 |
| 27 | 0.2710 | 18.545 | 20.527 | 9.837  | 19.421 | 15.184 |
| 27 | 0.2720 | 15.195 | 7.926  | 16.066 | 24.913 | 18.172 |
| 27 | 0.2730 | 10.323 | 5.143  | 11.386 | 8.384  | 6.384  |
| 27 | 0.2740 | 5.994  | 11.326 | 10.544 | 11.699 | 12.692 |
| 27 | 0.2750 | 6.520  | 9.002  | 9.124  | 15.366 | 10.020 |
| 27 | 0.2760 | 11.652 | 9.538  | 13.610 | 28.566 | 18.934 |
| 27 | 0.2770 | 14.879 | 13.552 | 16.334 | 12.497 | 16.523 |
| 27 | 0.2780 | 9.465  | 10.138 | 9.723  | 10.972 | 20.880 |
| 27 | 0.2790 | 7.270  | 8.296  | 7.659  | 5.873  | 10.174 |
| 27 | 0.2800 | 4.643  | 8.556  | 10.887 | 6.624  | 11.927 |
| 27 | 0.2810 | 12.540 | 14.326 | 15.487 | 20.184 | 21.253 |
| 27 | 0.2820 | 13.188 | 12.799 | 7.763  | 7.918  | 26.074 |
| 27 | 0.2830 | 10.238 | 14.982 | 9.856  | 15.185 | 21.945 |
| 27 | 0.2840 | 13.609 | 6.301  | 15.671 | 18.721 | 15.325 |
| 27 | 0.2850 | 17.110 | 11.526 | 16.782 | 13.159 | 17.844 |
| 27 | 0.2860 | 17.136 | 11.526 | 16.801 | 13.115 | 17.718 |
| 27 | 0.2870 | 13.447 | 12.590 | 13.665 | 17.518 | 6.931  |
| 27 | 0.2880 | 7.493  | 8.159  | 8.704  | 28.347 | 14.143 |
| 27 | 0.2890 | 12.970 | 19.249 | 15.645 | 26.722 | 12.764 |
| 27 | 0.2900 | 11.641 | 15.091 | 11.635 | 27.853 | 9.487  |

|    |        |        |        |        |        |        |
|----|--------|--------|--------|--------|--------|--------|
| 27 | 0.2910 | 8.158  | 11.925 | 6.238  | 18.772 | 6.182  |
| 27 | 0.2920 | 13.132 | 15.036 | 12.512 | 15.251 | 5.636  |
| 27 | 0.2930 | 16.733 | 15.559 | 17.482 | 14.001 | 7.198  |
| 27 | 0.2940 | 8.378  | 8.971  | 4.982  | 12.452 | 7.634  |
| 27 | 0.2950 | 8.648  | 8.169  | 6.695  | 8.479  | 8.411  |
| 27 | 0.2960 | 8.191  | 9.553  | 7.622  | 8.104  | 15.626 |
| 27 | 0.2970 | 21.912 | 14.814 | 21.581 | 19.078 | 9.794  |
| 27 | 0.2980 | 21.932 | 14.789 | 21.595 | 19.192 | 9.843  |
| 27 | 0.2990 | 24.211 | 13.306 | 24.104 | 19.642 | 8.312  |
| 27 | 0.3000 | 15.546 | 16.913 | 11.544 | 12.972 | 16.932 |
| 27 | 0.3010 | 17.072 | 10.167 | 8.076  | 22.002 | 31.471 |
| 27 | 0.3020 | 7.490  | 10.145 | 5.556  | 17.623 | 21.354 |
| 27 | 0.3030 | 7.424  | 10.134 | 5.502  | 17.536 | 21.456 |
| 27 | 0.3040 | 18.292 | 19.494 | 15.275 | 17.137 | 21.166 |
| 27 | 0.3050 | 16.170 | 12.434 | 10.912 | 13.295 | 14.085 |
| 27 | 0.3060 | 16.181 | 12.416 | 10.918 | 13.220 | 14.144 |
| 27 | 0.3070 | 13.545 | 10.990 | 11.438 | 16.069 | 17.373 |
| 27 | 0.3080 | 11.713 | 5.653  | 10.110 | 12.662 | 19.635 |
| 27 | 0.3090 | 21.605 | 7.895  | 12.573 | 17.382 | 11.834 |
| 27 | 0.3100 | 12.240 | 14.356 | 9.630  | 11.911 | 16.370 |
| 27 | 0.3110 | 13.114 | 14.605 | 6.681  | 21.529 | 16.994 |
| 27 | 0.3120 | 6.716  | 5.813  | 7.765  | 6.718  | 10.483 |
| 27 | 0.3130 | 17.453 | 16.007 | 11.899 | 21.271 | 9.149  |
| 27 | 0.3140 | 21.867 | 17.830 | 13.578 | 18.081 | 31.157 |
| 27 | 0.3150 | 17.035 | 23.581 | 11.072 | 21.552 | 37.678 |
| 27 | 0.3160 | 13.523 | 13.414 | 14.569 | 17.462 | 22.562 |
| 27 | 0.3170 | 23.433 | 22.739 | 18.603 | 22.293 | 10.452 |
| 27 | 0.3180 | 15.812 | 21.788 | 15.893 | 15.322 | 20.378 |
| 27 | 0.3190 | 10.788 | 7.399  | 4.999  | 9.923  | 8.534  |
| 27 | 0.3200 | 15.923 | 11.019 | 13.442 | 20.024 | 19.906 |
| 27 | 0.3210 | 10.608 | 9.524  | 10.391 | 12.089 | 8.923  |
| 27 | 0.3220 | 9.506  | 7.651  | 8.656  | 21.452 | 14.020 |
| 27 | 0.3230 | 25.806 | 21.699 | 16.702 | 16.305 | 24.011 |
| 27 | 0.3240 | 26.498 | 24.206 | 17.212 | 14.976 | 21.398 |
| 27 | 0.3250 | 11.551 | 11.919 | 14.010 | 19.857 | 20.600 |
| 27 | 0.3260 | 20.630 | 19.954 | 18.369 | 13.649 | 21.183 |
| 27 | 0.3270 | 20.485 | 13.896 | 18.022 | 15.003 | 18.237 |
| 27 | 0.3280 | 14.957 | 11.905 | 15.756 | 10.959 | 14.898 |
| 27 | 0.3290 | 9.592  | 4.958  | 7.171  | 5.087  | 10.475 |
| 27 | 0.3300 | 13.281 | 16.580 | 10.031 | 9.644  | 8.064  |
| 27 | 0.3310 | 16.016 | 19.488 | 13.574 | 17.151 | 18.209 |
| 27 | 0.3320 | 29.284 | 24.793 | 19.412 | 13.623 | 22.510 |
| 27 | 0.3330 | 29.275 | 24.811 | 19.380 | 13.665 | 22.509 |
| 27 | 0.3340 | 23.980 | 22.792 | 22.229 | 15.814 | 12.807 |
| 27 | 0.3350 | 25.046 | 15.338 | 19.782 | 16.526 | 12.042 |
| 27 | 0.3360 | 26.691 | 12.777 | 16.413 | 16.003 | 17.368 |
| 27 | 0.3370 | 25.242 | 16.455 | 13.458 | 22.593 | 20.321 |
| 27 | 0.3380 | 17.520 | 17.017 | 11.627 | 23.567 | 23.190 |
| 27 | 0.3390 | 21.813 | 20.729 | 19.279 | 16.718 | 23.976 |
| 27 | 0.3400 | 16.043 | 14.733 | 13.177 | 12.741 | 11.813 |

|    |        |        |        |        |        |        |
|----|--------|--------|--------|--------|--------|--------|
| 27 | 0.3410 | 16.893 | 10.250 | 11.917 | 12.537 | 26.997 |
| 27 | 0.3420 | 21.768 | 12.215 | 13.852 | 7.167  | 16.789 |
| 27 | 0.3430 | 11.379 | 13.031 | 7.390  | 10.442 | 15.523 |
| 27 | 0.3440 | 8.684  | 12.374 | 5.206  | 17.417 | 9.899  |
| 27 | 0.3450 | 14.217 | 13.250 | 5.624  | 26.761 | 12.144 |
| 27 | 0.3460 | 5.033  | 6.500  | 1.358  | 19.564 | 8.496  |
| 27 | 0.3470 | 13.403 | 13.618 | 9.802  | 24.973 | 14.919 |
| 27 | 0.3480 | 12.661 | 15.410 | 10.053 | 16.973 | 12.514 |
| 27 | 0.3490 | 10.698 | 8.875  | 7.333  | 16.336 | 7.240  |
| 27 | 0.3500 | 17.771 | 20.203 | 13.926 | 21.195 | 13.755 |
| 27 | 0.3510 | 15.729 | 12.070 | 10.235 | 17.608 | 16.702 |
| 27 | 0.3520 | 13.713 | 26.624 | 15.001 | 35.654 | 16.761 |
| 27 | 0.3530 | 14.363 | 22.030 | 12.458 | 27.522 | 21.088 |
| 27 | 0.3540 | 14.013 | 16.364 | 11.486 | 8.867  | 5.650  |
| 27 | 0.3550 | 16.116 | 17.767 | 13.110 | 14.819 | 15.132 |
| 27 | 0.3560 | 8.369  | 9.830  | 9.595  | 21.769 | 16.945 |
| 27 | 0.3570 | 8.779  | 11.437 | 10.843 | 21.288 | 14.080 |
| 27 | 0.3580 | 6.546  | 12.073 | 5.710  | 13.220 | 15.184 |
| 27 | 0.3590 | 14.510 | 27.674 | 21.295 | 20.783 | 21.669 |
| 27 | 0.3600 | 20.407 | 33.340 | 23.835 | 26.258 | 17.919 |
| 27 | 0.3610 | 18.763 | 25.099 | 17.820 | 19.284 | 14.726 |
| 27 | 0.3620 | 8.782  | 17.342 | 9.496  | 24.903 | 17.868 |
| 27 | 0.3630 | 13.558 | 14.108 | 12.414 | 12.217 | 17.073 |
| 27 | 0.3640 | 29.520 | 26.184 | 22.412 | 16.397 | 13.701 |
| 27 | 0.3650 | 16.594 | 20.324 | 11.039 | 15.256 | 12.943 |
| 27 | 0.3660 | 8.863  | 10.176 | 7.032  | 12.917 | 11.615 |
| 27 | 0.3670 | 6.650  | 11.265 | 11.361 | 8.386  | 19.742 |
| 27 | 0.3680 | 21.449 | 24.204 | 18.667 | 26.787 | 27.098 |
| 27 | 0.3690 | 22.312 | 26.214 | 13.647 | 19.986 | 10.931 |
| 27 | 0.3700 | 4.554  | 17.459 | 7.276  | 19.133 | 14.885 |
| 27 | 0.3710 | 8.140  | 10.546 | 11.866 | 14.833 | 8.114  |
| 27 | 0.3720 | 6.142  | 12.341 | 6.062  | 16.340 | 15.273 |
| 27 | 0.3730 | 6.301  | 13.502 | 12.027 | 18.169 | 28.600 |
| 27 | 0.3740 | 7.512  | 18.180 | 14.283 | 26.034 | 22.737 |
| 27 | 0.3750 | 11.945 | 16.541 | 10.532 | 17.505 | 15.710 |
| 27 | 0.3760 | 9.666  | 12.729 | 7.260  | 14.988 | 23.093 |
| 27 | 0.3770 | 12.651 | 17.094 | 12.094 | 19.394 | 28.034 |
| 27 | 0.3780 | 8.615  | 18.516 | 11.184 | 11.111 | 22.388 |
| 27 | 0.3790 | 9.438  | 23.476 | 12.241 | 16.811 | 15.604 |
| 27 | 0.3800 | 8.150  | 20.120 | 6.012  | 15.921 | 15.377 |
| 27 | 0.3810 | 12.376 | 11.764 | 9.111  | 10.009 | 19.239 |
| 27 | 0.3820 | 15.375 | 24.149 | 12.238 | 14.646 | 34.004 |
| 27 | 0.3830 | 6.826  | 5.177  | 3.838  | 9.048  | 23.394 |
| 27 | 0.3840 | 13.404 | 10.763 | 5.903  | 6.781  | 17.314 |
| 27 | 0.3850 | 12.184 | 13.152 | 8.966  | 13.966 | 9.375  |
| 27 | 0.3860 | 5.520  | 9.156  | 9.189  | 8.189  | 19.897 |
| 27 | 0.3870 | 17.454 | 11.181 | 11.984 | 12.856 | 19.121 |
| 27 | 0.3880 | 9.452  | 16.205 | 11.103 | 16.631 | 23.675 |
| 27 | 0.3890 | 12.628 | 7.737  | 9.114  | 9.355  | 24.240 |
| 27 | 0.3900 | 14.474 | 9.702  | 14.926 | 5.106  | 14.553 |

|    |        |        |        |        |        |        |
|----|--------|--------|--------|--------|--------|--------|
| 27 | 0.3910 | 14.483 | 11.893 | 11.866 | 4.535  | 26.046 |
| 27 | 0.3920 | 18.666 | 10.535 | 10.893 | 6.436  | 26.738 |
| 27 | 0.3930 | 9.648  | 7.624  | 8.777  | 7.267  | 17.793 |
| 27 | 0.3940 | 11.129 | 7.340  | 6.775  | 5.493  | 5.084  |
| 27 | 0.3950 | 21.258 | 22.668 | 19.894 | 13.056 | 20.474 |
| 27 | 0.3960 | 14.640 | 19.747 | 16.425 | 15.653 | 20.948 |
| 27 | 0.3970 | 6.415  | 8.948  | 6.805  | 17.103 | 20.457 |
| 27 | 0.3980 | 14.757 | 26.245 | 15.829 | 34.844 | 23.906 |
| 27 | 0.3990 | 4.591  | 13.167 | 10.154 | 22.501 | 19.618 |
| 27 | 0.4000 | 10.400 | 18.552 | 15.022 | 21.416 | 17.572 |
| 27 | 0.4010 | 8.105  | 7.947  | 6.518  | 13.560 | 10.458 |
| 27 | 0.4020 | 14.706 | 15.703 | 12.217 | 15.227 | 13.280 |
| 27 | 0.4030 | 11.151 | 12.357 | 3.834  | 22.072 | 19.814 |
| 27 | 0.4040 | 10.987 | 12.157 | 3.711  | 22.117 | 19.909 |
| 27 | 0.4050 | 18.548 | 9.497  | 13.822 | 10.892 | 17.628 |
| 27 | 0.4060 | 17.257 | 22.770 | 12.596 | 13.007 | 30.944 |
| 27 | 0.4070 | 9.063  | 9.242  | 5.450  | 13.631 | 19.976 |
| 27 | 0.4080 | 10.306 | 11.238 | 9.580  | 16.210 | 13.108 |
| 27 | 0.4090 | 10.234 | 10.071 | 9.191  | 16.828 | 21.024 |
| 27 | 0.4100 | 21.232 | 15.266 | 12.116 | 14.306 | 25.611 |
| 27 | 0.4110 | 11.815 | 19.030 | 13.996 | 16.761 | 13.640 |
| 27 | 0.4120 | 7.466  | 11.974 | 7.198  | 20.760 | 12.191 |
| 27 | 0.4130 | 8.985  | 10.882 | 10.068 | 21.322 | 11.713 |
| 27 | 0.4140 | 16.284 | 9.754  | 11.745 | 9.955  | 27.035 |
| 27 | 0.4150 | 8.816  | 12.947 | 10.874 | 19.268 | 21.572 |
| 27 | 0.4160 | 17.823 | 17.240 | 20.752 | 10.347 | 17.733 |
| 27 | 0.4170 | 16.250 | 13.154 | 13.677 | 14.170 | 15.906 |
| 27 | 0.4180 | 6.598  | 19.953 | 7.697  | 9.259  | 4.306  |
| 27 | 0.4190 | 13.414 | 11.598 | 7.847  | 16.804 | 18.908 |
| 27 | 0.4200 | 12.193 | 9.358  | 11.108 | 9.371  | 17.326 |
| 27 | 0.4210 | 13.780 | 16.407 | 11.778 | 14.295 | 19.110 |
| 27 | 0.4220 | 14.963 | 18.676 | 13.300 | 20.751 | 16.905 |
| 27 | 0.4230 | 20.687 | 19.436 | 13.768 | 29.500 | 18.125 |
| 27 | 0.4240 | 17.453 | 8.336  | 15.910 | 24.014 | 19.965 |
| 27 | 0.4250 | 19.905 | 12.586 | 21.080 | 23.895 | 17.334 |
| 27 | 0.4260 | 19.269 | 23.086 | 20.295 | 27.130 | 28.606 |
| 27 | 0.4270 | 10.217 | 11.574 | 8.477  | 11.811 | 15.701 |
| 27 | 0.4280 | 18.401 | 15.440 | 11.912 | 11.528 | 22.653 |
| 27 | 0.4290 | 12.925 | 16.526 | 11.510 | 23.114 | 30.555 |
| 27 | 0.4300 | 13.795 | 13.636 | 9.412  | 18.710 | 17.772 |
| 27 | 0.4310 | 11.904 | 15.468 | 8.381  | 15.196 | 14.448 |
| 27 | 0.4320 | 3.599  | 5.169  | 3.196  | 20.374 | 17.541 |
| 27 | 0.4330 | 13.555 | 17.275 | 16.572 | 24.344 | 9.065  |
| 27 | 0.4340 | 13.693 | 16.587 | 12.437 | 14.721 | 17.905 |
| 27 | 0.4350 | 16.331 | 22.269 | 14.061 | 20.945 | 23.989 |
| 27 | 0.4360 | 9.568  | 15.201 | 12.890 | 16.521 | 9.937  |
| 27 | 0.4370 | 3.480  | 5.163  | 3.280  | 10.191 | 11.219 |
| 27 | 0.4380 | 7.997  | 8.225  | 8.092  | 5.652  | 17.961 |
| 27 | 0.4390 | 2.946  | 3.643  | 2.578  | 5.239  | 9.248  |
| 27 | 0.4400 | 2.195  | 2.992  | 3.520  | 5.203  | 12.163 |

|    |        |        |        |        |        |        |
|----|--------|--------|--------|--------|--------|--------|
| 27 | 0.4410 | 1.000  | 1.000  | 1.000  | 1.000  | 1.000  |
| 28 | 0.0003 | 0.000  | 0.000  | 0.000  | 0.000  | 0.000  |
| 28 | 0.0013 | 16.782 | 15.458 | 16.966 | 9.423  | 7.368  |
| 28 | 0.0023 | 24.496 | 21.788 | 26.660 | 9.213  | 13.008 |
| 28 | 0.0033 | 21.139 | 19.515 | 17.912 | 9.616  | 16.939 |
| 28 | 0.0043 | 15.518 | 13.114 | 17.309 | 9.822  | 12.188 |
| 28 | 0.0053 | 15.509 | 13.091 | 17.334 | 9.828  | 12.183 |
| 28 | 0.0063 | 10.991 | 13.781 | 16.594 | 9.224  | 10.211 |
| 28 | 0.0073 | 5.284  | 8.331  | 6.877  | 7.955  | 4.792  |
| 28 | 0.0083 | 25.438 | 17.196 | 24.035 | 6.446  | 8.876  |
| 28 | 0.0093 | 24.719 | 13.893 | 23.660 | 6.719  | 10.992 |
| 28 | 0.0103 | 16.508 | 16.950 | 17.582 | 19.153 | 19.039 |
| 28 | 0.0113 | 22.415 | 26.626 | 22.045 | 12.881 | 6.679  |
| 28 | 0.0123 | 22.059 | 23.217 | 18.050 | 13.742 | 6.685  |
| 28 | 0.0133 | 25.534 | 20.731 | 20.527 | 7.307  | 4.842  |
| 28 | 0.0143 | 20.247 | 19.177 | 15.492 | 7.680  | 5.646  |
| 28 | 0.0153 | 23.693 | 23.690 | 21.683 | 10.909 | 10.425 |
| 28 | 0.0163 | 28.258 | 29.692 | 24.118 | 13.172 | 13.997 |
| 28 | 0.0173 | 12.902 | 20.242 | 14.431 | 24.369 | 20.989 |
| 28 | 0.0183 | 15.209 | 21.619 | 16.361 | 16.905 | 15.374 |
| 28 | 0.0193 | 17.872 | 11.143 | 15.879 | 17.692 | 16.041 |
| 28 | 0.0203 | 13.086 | 12.716 | 16.390 | 13.614 | 14.757 |
| 28 | 0.0213 | 14.405 | 13.827 | 15.147 | 11.973 | 7.052  |
| 28 | 0.0223 | 10.341 | 11.595 | 13.050 | 8.381  | 3.905  |
| 28 | 0.0233 | 8.902  | 6.013  | 10.185 | 7.809  | 3.729  |
| 28 | 0.0243 | 10.668 | 9.575  | 11.310 | 8.429  | 8.878  |
| 28 | 0.0253 | 17.929 | 21.511 | 18.454 | 14.572 | 11.277 |
| 28 | 0.0263 | 16.113 | 17.079 | 13.515 | 19.665 | 14.248 |
| 28 | 0.0273 | 24.562 | 20.495 | 17.807 | 31.036 | 16.288 |
| 28 | 0.0283 | 14.545 | 9.158  | 11.002 | 10.486 | 11.522 |
| 28 | 0.0293 | 9.901  | 11.522 | 10.223 | 8.533  | 10.866 |
| 28 | 0.0303 | 15.972 | 13.454 | 16.960 | 10.641 | 5.618  |
| 28 | 0.0313 | 19.264 | 14.056 | 17.137 | 6.353  | 7.211  |
| 28 | 0.0323 | 20.069 | 10.287 | 15.963 | 8.713  | 7.928  |
| 28 | 0.0333 | 30.165 | 18.442 | 29.070 | 13.830 | 10.008 |
| 28 | 0.0343 | 21.158 | 17.297 | 26.171 | 15.004 | 10.050 |
| 28 | 0.0353 | 23.671 | 18.439 | 22.949 | 9.482  | 9.147  |
| 28 | 0.0363 | 13.875 | 18.835 | 22.174 | 18.904 | 11.534 |
| 28 | 0.0373 | 17.819 | 17.551 | 22.567 | 21.645 | 8.196  |
| 28 | 0.0383 | 8.265  | 16.113 | 11.353 | 19.337 | 7.235  |
| 28 | 0.0393 | 16.164 | 16.799 | 17.498 | 29.417 | 6.988  |
| 28 | 0.0403 | 25.735 | 19.952 | 25.842 | 23.096 | 19.287 |
| 28 | 0.0413 | 17.993 | 13.329 | 17.781 | 11.487 | 13.949 |
| 28 | 0.0423 | 8.593  | 14.284 | 13.624 | 26.965 | 17.189 |
| 28 | 0.0433 | 15.306 | 14.561 | 19.168 | 15.940 | 9.359  |
| 28 | 0.0443 | 17.097 | 12.096 | 16.877 | 22.038 | 20.561 |
| 28 | 0.0453 | 14.903 | 7.861  | 14.178 | 20.384 | 20.067 |
| 28 | 0.0463 | 17.302 | 10.662 | 15.733 | 12.253 | 9.328  |
| 28 | 0.0473 | 29.909 | 11.847 | 28.034 | 17.572 | 13.545 |
| 28 | 0.0483 | 26.968 | 10.134 | 21.514 | 15.826 | 8.919  |

|    |        |        |        |        |        |        |
|----|--------|--------|--------|--------|--------|--------|
| 28 | 0.0493 | 19.809 | 20.834 | 20.865 | 23.033 | 13.550 |
| 28 | 0.0503 | 15.716 | 11.032 | 16.314 | 17.919 | 15.169 |
| 28 | 0.0513 | 14.314 | 6.835  | 11.545 | 14.462 | 16.574 |
| 28 | 0.0523 | 15.134 | 8.992  | 17.103 | 16.074 | 23.853 |
| 28 | 0.0533 | 14.921 | 8.743  | 16.754 | 16.104 | 23.791 |
| 28 | 0.0543 | 25.092 | 17.505 | 18.277 | 21.533 | 19.312 |
| 28 | 0.0553 | 18.905 | 7.698  | 12.923 | 17.591 | 16.352 |
| 28 | 0.0563 | 5.598  | 6.490  | 7.400  | 9.179  | 9.838  |
| 28 | 0.0573 | 4.072  | 6.757  | 7.701  | 14.996 | 13.929 |
| 28 | 0.0583 | 10.925 | 6.319  | 12.608 | 17.249 | 16.087 |
| 28 | 0.0593 | 13.179 | 10.892 | 11.717 | 17.355 | 7.248  |
| 28 | 0.0603 | 6.499  | 6.117  | 10.666 | 20.618 | 13.908 |
| 28 | 0.0613 | 17.668 | 17.472 | 14.592 | 21.217 | 14.459 |
| 28 | 0.0623 | 17.643 | 17.403 | 14.549 | 21.176 | 14.470 |
| 28 | 0.0633 | 14.993 | 7.188  | 13.557 | 12.938 | 14.880 |
| 28 | 0.0643 | 14.283 | 7.767  | 13.696 | 13.392 | 7.287  |
| 28 | 0.0653 | 15.426 | 13.432 | 16.259 | 11.775 | 13.446 |
| 28 | 0.0663 | 14.449 | 12.905 | 10.770 | 9.590  | 17.210 |
| 28 | 0.0673 | 7.509  | 6.841  | 10.966 | 9.487  | 8.273  |
| 28 | 0.0683 | 18.219 | 19.594 | 19.324 | 13.667 | 12.461 |
| 28 | 0.0693 | 9.119  | 10.506 | 10.853 | 12.249 | 9.567  |
| 28 | 0.0703 | 20.490 | 20.489 | 17.271 | 15.824 | 12.008 |
| 28 | 0.0713 | 11.722 | 19.119 | 14.324 | 15.776 | 19.549 |
| 28 | 0.0723 | 12.028 | 8.438  | 9.220  | 13.008 | 9.397  |
| 28 | 0.0733 | 14.525 | 9.070  | 14.850 | 24.321 | 24.888 |
| 28 | 0.0743 | 9.435  | 6.607  | 15.376 | 12.120 | 6.006  |
| 28 | 0.0753 | 12.269 | 13.279 | 12.255 | 9.532  | 14.884 |
| 28 | 0.0763 | 17.230 | 7.323  | 11.239 | 14.894 | 10.600 |
| 28 | 0.0773 | 12.592 | 7.178  | 13.391 | 15.547 | 24.316 |
| 28 | 0.0783 | 15.669 | 9.224  | 14.878 | 20.731 | 31.583 |
| 28 | 0.0793 | 10.229 | 6.440  | 12.577 | 17.792 | 12.389 |
| 28 | 0.0803 | 7.967  | 4.414  | 8.974  | 16.494 | 23.536 |
| 28 | 0.0813 | 15.554 | 6.433  | 10.622 | 13.949 | 29.914 |
| 28 | 0.0823 | 13.447 | 11.227 | 12.024 | 9.622  | 18.655 |
| 28 | 0.0833 | 29.226 | 18.384 | 30.526 | 13.744 | 9.855  |
| 28 | 0.0843 | 8.856  | 2.052  | 6.757  | 16.407 | 11.960 |
| 28 | 0.0853 | 18.633 | 6.772  | 13.163 | 10.724 | 8.767  |
| 28 | 0.0863 | 12.744 | 6.549  | 8.960  | 17.193 | 17.497 |
| 28 | 0.0873 | 13.557 | 6.864  | 12.946 | 14.961 | 18.889 |
| 28 | 0.0883 | 14.620 | 11.269 | 13.131 | 18.644 | 16.289 |
| 28 | 0.0893 | 11.566 | 13.884 | 13.499 | 16.451 | 16.303 |
| 28 | 0.0903 | 11.053 | 4.941  | 9.208  | 11.591 | 22.218 |
| 28 | 0.0913 | 14.573 | 9.133  | 14.272 | 14.706 | 23.965 |
| 28 | 0.0923 | 15.974 | 17.350 | 17.183 | 11.407 | 13.870 |
| 28 | 0.0933 | 11.256 | 9.998  | 10.577 | 9.910  | 15.666 |
| 28 | 0.0943 | 10.645 | 11.104 | 10.606 | 19.725 | 12.536 |
| 28 | 0.0953 | 7.812  | 9.196  | 9.500  | 10.997 | 12.120 |
| 28 | 0.0963 | 17.386 | 13.687 | 11.750 | 8.475  | 18.745 |
| 28 | 0.0973 | 14.833 | 10.434 | 11.555 | 9.915  | 7.702  |
| 28 | 0.0983 | 14.267 | 14.639 | 17.698 | 15.220 | 9.904  |

|    |        |        |        |        |        |        |
|----|--------|--------|--------|--------|--------|--------|
| 28 | 0.0993 | 9.586  | 7.227  | 8.820  | 16.737 | 3.318  |
| 28 | 0.1003 | 6.366  | 6.005  | 7.047  | 7.270  | 5.560  |
| 28 | 0.1013 | 7.009  | 8.147  | 10.835 | 16.766 | 16.064 |
| 28 | 0.1023 | 8.741  | 10.270 | 12.326 | 20.903 | 25.691 |
| 28 | 0.1033 | 16.144 | 20.388 | 15.378 | 16.999 | 14.537 |
| 28 | 0.1043 | 11.309 | 20.562 | 17.483 | 18.802 | 12.384 |
| 28 | 0.1053 | 7.726  | 4.791  | 9.643  | 10.526 | 9.663  |
| 28 | 0.1063 | 4.692  | 6.831  | 4.611  | 12.848 | 9.120  |
| 28 | 0.1073 | 11.029 | 9.516  | 10.398 | 12.897 | 10.181 |
| 28 | 0.1083 | 16.077 | 4.329  | 14.863 | 5.033  | 5.719  |
| 28 | 0.1093 | 14.102 | 3.671  | 11.620 | 10.519 | 5.113  |
| 28 | 0.1103 | 4.399  | 5.319  | 6.250  | 7.228  | 2.499  |
| 28 | 0.1113 | 9.281  | 9.291  | 13.491 | 7.493  | 7.464  |
| 28 | 0.1123 | 15.975 | 13.361 | 23.113 | 2.139  | 11.043 |
| 28 | 0.1133 | 15.315 | 8.633  | 16.491 | 16.921 | 7.422  |
| 28 | 0.1143 | 21.100 | 13.193 | 21.845 | 7.504  | 9.137  |
| 28 | 0.1153 | 8.699  | 13.771 | 14.891 | 15.267 | 6.156  |
| 28 | 0.1163 | 4.224  | 6.486  | 7.860  | 11.416 | 10.429 |
| 28 | 0.1173 | 7.733  | 9.472  | 9.924  | 17.806 | 14.725 |
| 28 | 0.1183 | 9.646  | 10.479 | 10.290 | 14.551 | 12.586 |
| 28 | 0.1193 | 10.370 | 11.137 | 12.877 | 11.203 | 12.678 |
| 28 | 0.1203 | 7.712  | 7.094  | 7.182  | 21.782 | 14.569 |
| 28 | 0.1213 | 7.044  | 5.773  | 5.944  | 15.285 | 9.216  |
| 28 | 0.1223 | 16.822 | 14.993 | 19.264 | 9.754  | 12.732 |
| 28 | 0.1233 | 13.205 | 11.386 | 16.919 | 15.224 | 14.309 |
| 28 | 0.1243 | 13.004 | 11.173 | 17.732 | 20.916 | 7.889  |
| 28 | 0.1253 | 11.258 | 13.977 | 10.509 | 21.563 | 9.651  |
| 28 | 0.1263 | 10.013 | 10.340 | 12.705 | 11.533 | 6.148  |
| 28 | 0.1273 | 6.118  | 7.523  | 8.290  | 12.469 | 5.172  |
| 28 | 0.1283 | 14.788 | 7.055  | 14.377 | 15.922 | 15.165 |
| 28 | 0.1293 | 13.353 | 8.695  | 14.993 | 11.750 | 18.443 |
| 28 | 0.1303 | 19.982 | 9.325  | 18.555 | 18.809 | 7.306  |
| 28 | 0.1313 | 14.791 | 10.913 | 13.977 | 5.881  | 6.090  |
| 28 | 0.1323 | 12.029 | 17.510 | 18.295 | 6.049  | 7.298  |
| 28 | 0.1333 | 9.680  | 12.489 | 14.713 | 9.903  | 8.677  |
| 28 | 0.1343 | 19.554 | 22.631 | 31.777 | 13.356 | 7.116  |
| 28 | 0.1353 | 12.749 | 11.975 | 13.682 | 14.480 | 13.149 |
| 28 | 0.1363 | 13.015 | 14.756 | 18.327 | 11.559 | 10.948 |
| 28 | 0.1373 | 13.848 | 11.691 | 17.653 | 7.174  | 11.492 |
| 28 | 0.1383 | 19.392 | 18.971 | 29.688 | 18.498 | 11.227 |
| 28 | 0.1393 | 13.396 | 14.514 | 18.014 | 15.700 | 13.542 |
| 28 | 0.1403 | 23.634 | 20.195 | 27.949 | 12.814 | 4.778  |
| 28 | 0.1413 | 10.024 | 10.099 | 14.140 | 13.582 | 6.405  |
| 28 | 0.1423 | 7.016  | 5.419  | 8.631  | 5.294  | 4.865  |
| 28 | 0.1433 | 12.161 | 10.394 | 12.358 | 14.370 | 9.655  |
| 28 | 0.1443 | 9.190  | 7.756  | 8.153  | 14.197 | 13.068 |
| 28 | 0.1453 | 22.414 | 17.584 | 24.009 | 21.620 | 9.572  |
| 28 | 0.1463 | 14.143 | 5.402  | 11.439 | 15.765 | 7.990  |
| 28 | 0.1473 | 13.189 | 13.960 | 13.246 | 16.571 | 16.691 |
| 28 | 0.1483 | 18.714 | 18.397 | 20.273 | 13.939 | 8.344  |

|    |        |        |        |        |        |        |
|----|--------|--------|--------|--------|--------|--------|
| 28 | 0.1493 | 5.428  | 3.750  | 4.496  | 15.532 | 9.925  |
| 28 | 0.1503 | 9.008  | 9.144  | 12.871 | 6.800  | 5.955  |
| 28 | 0.1513 | 7.451  | 6.648  | 9.284  | 7.648  | 6.645  |
| 28 | 0.1523 | 3.775  | 3.369  | 5.493  | 7.464  | 2.506  |
| 28 | 0.1533 | 16.588 | 22.024 | 19.058 | 14.048 | 10.167 |
| 28 | 0.1543 | 10.149 | 13.799 | 8.898  | 10.114 | 4.774  |
| 28 | 0.1553 | 7.758  | 11.148 | 10.079 | 8.553  | 3.916  |
| 28 | 0.1563 | 15.024 | 9.965  | 13.843 | 12.260 | 3.869  |
| 28 | 0.1573 | 10.691 | 12.751 | 15.356 | 17.236 | 10.403 |
| 28 | 0.1583 | 17.268 | 23.340 | 22.737 | 18.196 | 3.895  |
| 28 | 0.1593 | 9.418  | 7.325  | 11.102 | 16.254 | 11.588 |
| 28 | 0.1603 | 12.916 | 17.214 | 19.405 | 22.269 | 8.708  |
| 28 | 0.1613 | 12.583 | 13.969 | 10.656 | 12.254 | 6.227  |
| 28 | 0.1623 | 7.900  | 10.815 | 8.498  | 5.870  | 8.636  |
| 28 | 0.1633 | 4.429  | 5.714  | 5.716  | 7.563  | 9.235  |
| 28 | 0.1643 | 10.971 | 8.281  | 13.739 | 16.009 | 14.832 |
| 28 | 0.1653 | 10.972 | 8.231  | 13.768 | 15.961 | 14.861 |
| 28 | 0.1663 | 4.164  | 6.127  | 5.524  | 9.636  | 10.736 |
| 28 | 0.1673 | 11.427 | 17.239 | 13.110 | 22.197 | 13.038 |
| 28 | 0.1683 | 11.345 | 17.226 | 13.045 | 22.158 | 12.991 |
| 28 | 0.1693 | 11.265 | 17.213 | 12.981 | 22.118 | 12.951 |
| 28 | 0.1703 | 9.302  | 16.449 | 11.832 | 14.667 | 6.708  |
| 28 | 0.1713 | 9.536  | 10.367 | 14.106 | 16.543 | 6.059  |
| 28 | 0.1723 | 13.807 | 15.846 | 18.946 | 12.131 | 13.098 |
| 28 | 0.1733 | 6.678  | 10.038 | 9.174  | 11.736 | 12.739 |
| 28 | 0.1743 | 7.453  | 12.163 | 11.709 | 11.486 | 10.980 |
| 28 | 0.1753 | 19.073 | 23.501 | 24.143 | 18.554 | 8.038  |
| 28 | 0.1763 | 19.047 | 23.430 | 24.102 | 18.539 | 8.023  |
| 28 | 0.1773 | 12.029 | 5.074  | 11.237 | 12.860 | 16.131 |
| 28 | 0.1783 | 10.790 | 7.933  | 7.860  | 9.946  | 6.730  |
| 28 | 0.1793 | 5.877  | 6.267  | 3.757  | 5.240  | 6.196  |
| 28 | 0.1803 | 4.037  | 8.529  | 3.114  | 8.793  | 2.745  |
| 28 | 0.1813 | 11.855 | 16.567 | 21.410 | 17.641 | 12.217 |
| 28 | 0.1823 | 20.944 | 10.754 | 22.038 | 14.796 | 20.658 |
| 28 | 0.1833 | 15.629 | 11.966 | 20.055 | 9.572  | 17.673 |
| 28 | 0.1843 | 10.353 | 9.225  | 12.704 | 9.327  | 6.205  |
| 28 | 0.1853 | 17.301 | 23.858 | 21.767 | 18.168 | 7.682  |
| 28 | 0.1863 | 11.806 | 13.013 | 9.601  | 15.695 | 13.756 |
| 28 | 0.1873 | 13.245 | 14.525 | 10.058 | 19.458 | 10.822 |
| 28 | 0.1883 | 13.075 | 14.509 | 9.947  | 19.733 | 10.838 |
| 28 | 0.1893 | 7.810  | 9.434  | 7.773  | 9.537  | 6.933  |
| 28 | 0.1903 | 3.287  | 3.661  | 1.890  | 8.287  | 5.391  |
| 28 | 0.1913 | 1.823  | 1.594  | 0.068  | 5.856  | 4.748  |
| 28 | 0.1923 | 7.709  | 5.435  | 7.061  | 13.228 | 12.142 |
| 28 | 0.1933 | 15.231 | 15.182 | 14.728 | 24.162 | 19.373 |
| 28 | 0.1943 | 14.819 | 13.741 | 15.932 | 15.637 | 14.843 |
| 28 | 0.1953 | 15.857 | 15.873 | 22.073 | 10.289 | 18.132 |
| 28 | 0.1963 | 6.008  | 9.126  | 12.035 | 6.228  | 11.438 |
| 28 | 0.1973 | 11.740 | 10.023 | 13.952 | 11.402 | 11.535 |
| 28 | 0.1983 | 8.593  | 10.107 | 9.671  | 5.920  | 5.246  |



|    |        |        |        |        |        |        |
|----|--------|--------|--------|--------|--------|--------|
| 28 | 0.1993 | 10.663 | 10.279 | 10.552 | 10.064 | 4.800  |
| 28 | 0.2003 | 12.034 | 12.117 | 9.611  | 7.046  | 10.213 |
| 28 | 0.2013 | 15.559 | 14.261 | 16.889 | 4.356  | 19.404 |
| 28 | 0.2023 | 15.125 | 17.220 | 14.408 | 11.904 | 12.866 |
| 28 | 0.2033 | 6.787  | 7.923  | 10.878 | 7.481  | 7.547  |
| 28 | 0.2043 | 11.990 | 10.377 | 10.516 | 6.891  | 8.203  |
| 28 | 0.2053 | 13.083 | 7.209  | 7.935  | 20.214 | 11.061 |
| 28 | 0.2063 | 12.908 | 5.932  | 10.139 | 8.601  | 9.320  |
| 28 | 0.2073 | 15.878 | 9.228  | 10.054 | 12.024 | 7.196  |
| 28 | 0.2083 | 13.082 | 10.931 | 9.550  | 11.437 | 5.366  |
| 28 | 0.2093 | 10.555 | 15.539 | 10.517 | 15.276 | 14.460 |
| 28 | 0.2103 | 13.168 | 9.939  | 7.680  | 15.960 | 7.898  |
| 28 | 0.2113 | 4.293  | 6.261  | 4.779  | 9.720  | 3.123  |
| 28 | 0.2123 | 5.149  | 3.466  | 3.776  | 5.513  | 4.362  |
| 28 | 0.2133 | 4.693  | 10.783 | 6.569  | 17.660 | 6.391  |
| 28 | 0.2143 | 11.621 | 16.740 | 13.001 | 15.933 | 15.669 |
| 28 | 0.2153 | 13.508 | 9.664  | 12.363 | 11.939 | 7.597  |
| 28 | 0.2163 | 9.059  | 4.099  | 8.206  | 13.300 | 12.355 |
| 28 | 0.2173 | 8.529  | 11.111 | 9.456  | 13.908 | 6.601  |
| 28 | 0.2183 | 8.730  | 13.194 | 11.806 | 14.650 | 7.049  |
| 28 | 0.2193 | 9.758  | 14.344 | 10.335 | 17.258 | 9.759  |
| 28 | 0.2203 | 7.819  | 16.925 | 13.219 | 20.622 | 13.420 |
| 28 | 0.2213 | 6.394  | 6.260  | 7.171  | 14.378 | 7.804  |
| 28 | 0.2223 | 4.768  | 6.724  | 5.745  | 12.237 | 6.355  |
| 28 | 0.2233 | 6.070  | 8.363  | 9.714  | 10.956 | 10.210 |
| 28 | 0.2243 | 9.534  | 15.109 | 12.095 | 16.382 | 14.934 |
| 28 | 0.2253 | 8.447  | 4.682  | 6.058  | 14.176 | 13.875 |
| 28 | 0.2263 | 10.158 | 20.683 | 16.338 | 12.086 | 10.993 |
| 28 | 0.2273 | 9.245  | 21.199 | 13.070 | 15.016 | 12.808 |
| 28 | 0.2283 | 12.647 | 22.762 | 18.205 | 17.893 | 16.852 |
| 28 | 0.2293 | 8.232  | 14.320 | 6.371  | 9.443  | 7.965  |
| 28 | 0.2303 | 4.420  | 8.128  | 7.251  | 8.464  | 6.978  |
| 28 | 0.2313 | 13.960 | 13.837 | 15.617 | 14.508 | 12.411 |
| 28 | 0.2323 | 8.907  | 12.704 | 11.611 | 12.005 | 12.342 |
| 28 | 0.2333 | 10.250 | 14.078 | 12.808 | 8.897  | 15.268 |
| 28 | 0.2343 | 6.895  | 18.154 | 8.980  | 16.757 | 8.784  |
| 28 | 0.2353 | 10.137 | 16.162 | 14.965 | 11.122 | 9.408  |
| 28 | 0.2363 | 6.561  | 12.875 | 9.648  | 10.607 | 12.148 |
| 28 | 0.2373 | 12.999 | 10.389 | 14.788 | 7.813  | 16.162 |
| 28 | 0.2383 | 16.268 | 24.914 | 19.493 | 13.447 | 12.612 |
| 28 | 0.2393 | 11.833 | 20.467 | 12.924 | 15.400 | 6.818  |
| 28 | 0.2403 | 15.845 | 7.889  | 13.595 | 8.382  | 22.170 |
| 28 | 0.2413 | 12.030 | 8.171  | 12.101 | 9.063  | 10.416 |
| 28 | 0.2423 | 17.349 | 27.193 | 21.389 | 14.214 | 10.452 |
| 28 | 0.2433 | 12.934 | 29.212 | 23.489 | 12.974 | 15.634 |
| 28 | 0.2443 | 23.021 | 17.831 | 20.989 | 22.507 | 7.691  |
| 28 | 0.2453 | 9.825  | 13.701 | 8.045  | 19.467 | 8.603  |
| 28 | 0.2463 | 15.731 | 25.603 | 17.243 | 15.424 | 11.185 |
| 28 | 0.2473 | 21.939 | 19.104 | 21.417 | 18.776 | 15.886 |
| 28 | 0.2483 | 26.414 | 18.687 | 22.283 | 12.876 | 13.549 |

|    |        |        |        |        |        |        |
|----|--------|--------|--------|--------|--------|--------|
| 28 | 0.2493 | 23.232 | 18.709 | 19.589 | 27.466 | 10.157 |
| 28 | 0.2503 | 4.803  | 7.966  | 8.990  | 18.404 | 18.755 |
| 28 | 0.2513 | 13.762 | 20.330 | 20.911 | 27.834 | 15.337 |
| 28 | 0.2523 | 14.167 | 26.754 | 18.458 | 24.805 | 19.978 |
| 28 | 0.2533 | 15.813 | 31.005 | 31.327 | 26.796 | 14.236 |
| 28 | 0.2543 | 30.883 | 39.097 | 41.689 | 28.397 | 10.869 |
| 28 | 0.2553 | 30.806 | 38.950 | 41.539 | 28.426 | 10.877 |
| 28 | 0.2563 | 17.979 | 32.589 | 29.297 | 27.236 | 27.886 |
| 28 | 0.2573 | 10.781 | 20.828 | 12.981 | 21.233 | 14.882 |
| 28 | 0.2583 | 9.109  | 12.923 | 11.908 | 16.162 | 6.698  |
| 28 | 0.2593 | 17.348 | 10.035 | 10.871 | 13.134 | 20.882 |
| 28 | 0.2603 | 18.542 | 12.668 | 14.449 | 9.793  | 20.069 |
| 28 | 0.2613 | 11.199 | 22.568 | 14.460 | 16.672 | 8.681  |
| 28 | 0.2623 | 10.557 | 17.930 | 9.139  | 15.969 | 8.995  |
| 28 | 0.2633 | 6.181  | 16.480 | 7.947  | 9.536  | 0.788  |
| 28 | 0.2643 | 8.042  | 21.348 | 12.168 | 14.365 | 6.462  |
| 28 | 0.2653 | 14.445 | 14.748 | 8.695  | 16.986 | 11.872 |
| 28 | 0.2663 | 11.941 | 13.788 | 10.550 | 8.685  | 10.490 |
| 28 | 0.2673 | 13.751 | 16.684 | 16.863 | 10.674 | 10.889 |
| 28 | 0.2683 | 9.836  | 11.421 | 10.316 | 9.778  | 10.468 |
| 28 | 0.2693 | 12.030 | 15.231 | 12.016 | 10.635 | 11.364 |
| 28 | 0.2703 | 14.081 | 15.852 | 19.135 | 18.870 | 29.491 |
| 28 | 0.2713 | 9.710  | 8.025  | 6.254  | 14.136 | 15.586 |
| 28 | 0.2723 | 12.581 | 25.599 | 12.907 | 23.384 | 16.462 |
| 28 | 0.2733 | 10.135 | 18.547 | 6.711  | 17.855 | 8.743  |
| 28 | 0.2743 | 11.575 | 14.200 | 12.494 | 30.360 | 19.140 |
| 28 | 0.2753 | 6.463  | 11.276 | 12.442 | 14.140 | 16.969 |
| 28 | 0.2763 | 10.087 | 14.623 | 9.940  | 25.075 | 12.900 |
| 28 | 0.2773 | 19.996 | 22.153 | 17.931 | 18.490 | 15.097 |
| 28 | 0.2783 | 15.508 | 24.227 | 16.861 | 24.077 | 20.244 |
| 28 | 0.2793 | 17.546 | 26.973 | 20.595 | 32.016 | 19.099 |
| 28 | 0.2803 | 13.021 | 27.558 | 17.197 | 23.479 | 15.205 |
| 28 | 0.2813 | 11.745 | 20.021 | 15.855 | 18.715 | 10.933 |
| 28 | 0.2823 | 9.427  | 19.959 | 16.616 | 17.971 | 11.517 |
| 28 | 0.2833 | 7.666  | 21.101 | 16.947 | 27.310 | 16.272 |
| 28 | 0.2843 | 9.525  | 21.543 | 17.015 | 13.944 | 14.618 |
| 28 | 0.2853 | 10.296 | 21.542 | 13.998 | 20.503 | 26.165 |
| 28 | 0.2863 | 12.857 | 14.605 | 12.231 | 19.029 | 10.683 |
| 28 | 0.2873 | 12.149 | 19.034 | 12.533 | 19.803 | 10.832 |
| 28 | 0.2883 | 13.434 | 22.052 | 17.138 | 26.758 | 19.795 |
| 28 | 0.2893 | 14.755 | 19.905 | 10.391 | 26.602 | 20.243 |
| 28 | 0.2903 | 16.743 | 8.405  | 12.780 | 12.654 | 13.766 |
| 28 | 0.2913 | 22.606 | 15.296 | 16.247 | 17.633 | 16.491 |
| 28 | 0.2923 | 10.727 | 8.438  | 5.698  | 15.470 | 19.737 |
| 28 | 0.2933 | 10.794 | 8.548  | 5.795  | 15.305 | 19.644 |
| 28 | 0.2943 | 19.113 | 10.060 | 9.977  | 14.279 | 21.991 |
| 28 | 0.2953 | 12.071 | 7.092  | 9.254  | 15.898 | 18.201 |
| 28 | 0.2963 | 22.146 | 8.478  | 14.392 | 14.151 | 16.891 |
| 28 | 0.2973 | 17.538 | 18.341 | 22.348 | 14.532 | 5.230  |
| 28 | 0.2983 | 12.372 | 9.661  | 17.514 | 20.018 | 15.305 |

|    |        |        |        |        |        |        |
|----|--------|--------|--------|--------|--------|--------|
| 28 | 0.2993 | 26.074 | 17.199 | 19.878 | 13.916 | 10.376 |
| 28 | 0.3003 | 18.642 | 20.683 | 15.029 | 22.696 | 8.172  |
| 28 | 0.3013 | 13.626 | 15.452 | 14.051 | 23.324 | 12.732 |
| 28 | 0.3023 | 24.040 | 22.857 | 20.745 | 17.088 | 20.485 |
| 28 | 0.3033 | 15.028 | 9.046  | 16.114 | 15.403 | 15.605 |
| 28 | 0.3043 | 26.527 | 23.938 | 22.666 | 21.424 | 15.526 |
| 28 | 0.3053 | 27.809 | 23.315 | 22.590 | 23.402 | 15.681 |
| 28 | 0.3063 | 19.580 | 17.333 | 19.867 | 14.228 | 6.334  |
| 28 | 0.3073 | 18.015 | 12.634 | 13.380 | 15.639 | 6.302  |
| 28 | 0.3083 | 8.616  | 9.275  | 7.954  | 18.564 | 8.974  |
| 28 | 0.3093 | 16.944 | 10.458 | 16.367 | 13.420 | 16.534 |
| 28 | 0.3103 | 17.107 | 17.728 | 15.798 | 11.336 | 8.160  |
| 28 | 0.3113 | 14.170 | 16.347 | 10.904 | 13.912 | 15.693 |
| 28 | 0.3123 | 8.028  | 9.769  | 5.879  | 27.668 | 13.086 |
| 28 | 0.3133 | 17.712 | 22.890 | 13.155 | 19.536 | 11.776 |
| 28 | 0.3143 | 10.439 | 17.936 | 15.191 | 25.922 | 16.187 |
| 28 | 0.3153 | 10.159 | 17.839 | 11.255 | 28.434 | 9.712  |
| 28 | 0.3163 | 13.744 | 10.401 | 11.837 | 16.974 | 18.685 |
| 28 | 0.3173 | 13.728 | 18.963 | 13.778 | 19.665 | 14.378 |
| 28 | 0.3183 | 11.042 | 10.392 | 12.678 | 17.131 | 9.324  |
| 28 | 0.3193 | 13.535 | 6.452  | 13.355 | 21.452 | 17.266 |
| 28 | 0.3203 | 11.013 | 9.296  | 10.696 | 4.117  | 9.688  |
| 28 | 0.3213 | 14.238 | 11.622 | 16.897 | 13.475 | 18.393 |
| 28 | 0.3223 | 10.890 | 12.348 | 9.437  | 15.961 | 20.639 |
| 28 | 0.3233 | 11.808 | 21.781 | 10.300 | 32.438 | 22.854 |
| 28 | 0.3243 | 19.924 | 19.815 | 21.309 | 17.327 | 11.677 |
| 28 | 0.3253 | 9.197  | 11.421 | 15.942 | 19.519 | 13.641 |
| 28 | 0.3263 | 9.382  | 8.328  | 13.360 | 8.618  | 16.466 |
| 28 | 0.3273 | 6.669  | 9.658  | 6.037  | 11.994 | 7.256  |
| 28 | 0.3283 | 15.141 | 13.386 | 10.938 | 18.399 | 13.199 |
| 28 | 0.3293 | 7.357  | 12.307 | 11.738 | 12.090 | 11.969 |
| 28 | 0.3303 | 7.829  | 15.782 | 13.266 | 18.712 | 15.503 |
| 28 | 0.3313 | 4.507  | 10.625 | 11.676 | 12.561 | 8.100  |
| 28 | 0.3323 | 10.768 | 14.227 | 8.199  | 16.819 | 21.880 |
| 28 | 0.3333 | 17.482 | 13.044 | 11.177 | 19.205 | 22.605 |
| 28 | 0.3343 | 18.231 | 18.085 | 16.724 | 17.352 | 14.137 |
| 28 | 0.3353 | 7.014  | 9.716  | 7.909  | 17.948 | 11.398 |
| 28 | 0.3363 | 10.394 | 10.417 | 9.678  | 11.397 | 5.493  |
| 28 | 0.3373 | 10.447 | 15.468 | 8.893  | 17.616 | 23.937 |
| 28 | 0.3383 | 9.814  | 18.204 | 9.465  | 17.726 | 21.034 |
| 28 | 0.3393 | 6.077  | 10.177 | 7.131  | 15.571 | 16.386 |
| 28 | 0.3403 | 6.050  | 12.926 | 8.623  | 20.196 | 12.405 |
| 28 | 0.3413 | 7.295  | 9.930  | 5.670  | 23.603 | 24.093 |
| 28 | 0.3423 | 12.953 | 17.756 | 17.857 | 24.153 | 11.996 |
| 28 | 0.3433 | 12.030 | 12.374 | 12.432 | 26.493 | 19.419 |
| 28 | 0.3443 | 15.998 | 16.679 | 20.756 | 16.841 | 11.373 |
| 28 | 0.3453 | 11.790 | 10.907 | 12.897 | 16.872 | 13.073 |
| 28 | 0.3463 | 4.549  | 2.717  | 6.713  | 9.608  | 10.455 |
| 28 | 0.3473 | 9.899  | 14.587 | 9.576  | 19.445 | 12.237 |
| 28 | 0.3483 | 10.869 | 17.775 | 11.076 | 23.648 | 11.072 |

|    |        |        |        |        |        |        |
|----|--------|--------|--------|--------|--------|--------|
| 28 | 0.3493 | 5.804  | 18.072 | 9.625  | 28.885 | 21.520 |
| 28 | 0.3503 | 15.872 | 23.074 | 18.583 | 19.107 | 12.639 |
| 28 | 0.3513 | 14.517 | 15.985 | 17.490 | 17.196 | 13.982 |
| 28 | 0.3523 | 11.691 | 12.715 | 14.472 | 12.961 | 10.081 |
| 28 | 0.3533 | 7.991  | 14.914 | 10.708 | 16.504 | 13.494 |
| 28 | 0.3543 | 22.692 | 25.516 | 18.441 | 16.841 | 13.962 |
| 28 | 0.3553 | 11.323 | 11.242 | 15.319 | 8.143  | 12.464 |
| 28 | 0.3563 | 8.105  | 16.763 | 10.769 | 18.047 | 20.039 |
| 28 | 0.3573 | 13.982 | 20.013 | 15.592 | 13.905 | 13.557 |
| 28 | 0.3583 | 14.097 | 18.258 | 13.409 | 12.974 | 10.016 |
| 28 | 0.3593 | 14.051 | 18.196 | 13.406 | 12.940 | 10.003 |
| 28 | 0.3603 | 22.245 | 23.557 | 21.922 | 16.965 | 13.082 |
| 28 | 0.3613 | 8.683  | 16.867 | 12.960 | 12.825 | 10.953 |
| 28 | 0.3623 | 8.042  | 15.375 | 10.657 | 14.668 | 8.926  |
| 28 | 0.3633 | 9.551  | 13.231 | 10.699 | 19.589 | 13.447 |
| 28 | 0.3643 | 12.463 | 9.246  | 8.497  | 15.286 | 14.309 |
| 28 | 0.3653 | 12.197 | 13.240 | 7.536  | 11.460 | 14.301 |
| 28 | 0.3663 | 11.411 | 11.665 | 7.145  | 18.443 | 11.798 |
| 28 | 0.3673 | 10.611 | 10.937 | 7.732  | 17.240 | 12.501 |
| 28 | 0.3683 | 12.541 | 11.917 | 8.262  | 18.019 | 14.880 |
| 28 | 0.3693 | 13.776 | 11.906 | 8.858  | 23.372 | 29.611 |
| 28 | 0.3703 | 21.359 | 23.633 | 21.379 | 12.302 | 17.757 |
| 28 | 0.3713 | 19.728 | 19.310 | 17.859 | 22.797 | 22.826 |
| 28 | 0.3723 | 4.629  | 8.891  | 6.665  | 15.063 | 20.756 |
| 28 | 0.3733 | 11.960 | 15.532 | 14.771 | 4.346  | 15.532 |
| 28 | 0.3743 | 9.092  | 9.384  | 10.557 | 9.239  | 16.537 |
| 28 | 0.3753 | 9.012  | 10.331 | 6.352  | 12.549 | 23.976 |
| 28 | 0.3763 | 5.566  | 8.707  | 4.849  | 16.723 | 19.243 |
| 28 | 0.3773 | 7.300  | 8.881  | 5.256  | 20.983 | 12.400 |
| 28 | 0.3783 | 12.228 | 12.947 | 9.073  | 12.155 | 13.178 |
| 28 | 0.3793 | 11.728 | 14.236 | 8.957  | 18.401 | 11.436 |
| 28 | 0.3803 | 18.682 | 13.286 | 10.320 | 10.562 | 8.426  |
| 28 | 0.3813 | 16.434 | 10.622 | 13.228 | 12.272 | 10.485 |
| 28 | 0.3823 | 13.507 | 10.917 | 11.611 | 21.846 | 22.730 |
| 28 | 0.3833 | 29.521 | 13.405 | 14.208 | 23.923 | 35.702 |
| 28 | 0.3843 | 10.894 | 10.150 | 9.949  | 14.028 | 9.729  |
| 28 | 0.3853 | 14.791 | 9.641  | 16.392 | 15.093 | 21.996 |
| 28 | 0.3863 | 11.245 | 5.049  | 7.705  | 4.820  | 12.901 |
| 28 | 0.3873 | 8.086  | 11.641 | 5.884  | 17.195 | 22.846 |
| 28 | 0.3883 | 9.931  | 7.919  | 5.247  | 17.569 | 20.841 |
| 28 | 0.3893 | 12.138 | 9.609  | 9.356  | 18.212 | 16.244 |
| 28 | 0.3903 | 13.085 | 11.202 | 9.500  | 10.984 | 9.240  |
| 28 | 0.3913 | 23.242 | 24.878 | 15.433 | 28.280 | 33.849 |
| 28 | 0.3923 | 8.871  | 11.888 | 8.279  | 20.414 | 12.626 |
| 28 | 0.3933 | 5.878  | 13.067 | 4.905  | 17.673 | 8.727  |
| 28 | 0.3943 | 5.987  | 13.561 | 6.905  | 21.260 | 13.966 |
| 28 | 0.3953 | 17.902 | 19.129 | 16.738 | 23.438 | 20.966 |
| 28 | 0.3963 | 8.189  | 11.647 | 10.667 | 16.268 | 19.499 |
| 28 | 0.3973 | 25.282 | 21.681 | 18.282 | 24.723 | 29.631 |
| 28 | 0.3983 | 21.538 | 11.515 | 17.351 | 26.642 | 29.509 |

|    |        |        |        |        |        |        |
|----|--------|--------|--------|--------|--------|--------|
| 28 | 0.3993 | 9.025  | 10.268 | 7.023  | 9.453  | 16.069 |
| 28 | 0.4003 | 12.018 | 9.199  | 7.616  | 14.201 | 12.403 |
| 28 | 0.4013 | 23.168 | 12.485 | 8.934  | 27.488 | 29.263 |
| 28 | 0.4023 | 17.189 | 16.260 | 17.187 | 22.269 | 16.303 |
| 28 | 0.4033 | 21.929 | 19.869 | 19.969 | 25.854 | 14.949 |
| 28 | 0.4043 | 17.889 | 20.699 | 16.431 | 19.991 | 19.239 |
| 28 | 0.4053 | 11.715 | 9.590  | 9.872  | 8.482  | 18.592 |
| 28 | 0.4063 | 24.110 | 11.289 | 16.770 | 20.941 | 33.385 |
| 28 | 0.4073 | 9.212  | 12.053 | 7.469  | 25.907 | 17.816 |
| 28 | 0.4083 | 11.852 | 6.063  | 7.313  | 20.278 | 12.258 |
| 28 | 0.4093 | 19.153 | 15.995 | 14.432 | 26.896 | 11.785 |
| 28 | 0.4103 | 26.675 | 25.793 | 22.059 | 24.583 | 22.431 |
| 28 | 0.4113 | 17.274 | 8.483  | 9.435  | 15.678 | 22.806 |
| 28 | 0.4123 | 10.030 | 7.742  | 10.496 | 13.306 | 18.093 |
| 28 | 0.4133 | 18.774 | 10.750 | 10.777 | 12.097 | 14.385 |
| 28 | 0.4143 | 9.317  | 14.323 | 8.521  | 23.080 | 9.458  |
| 28 | 0.4153 | 8.393  | 12.618 | 6.801  | 17.415 | 4.151  |
| 28 | 0.4163 | 13.823 | 8.686  | 9.329  | 12.247 | 8.513  |
| 28 | 0.4173 | 23.393 | 16.364 | 14.929 | 10.064 | 12.933 |
| 28 | 0.4183 | 17.853 | 16.035 | 12.776 | 20.170 | 10.314 |
| 28 | 0.4193 | 22.597 | 24.617 | 19.632 | 28.718 | 25.514 |
| 28 | 0.4203 | 15.857 | 14.129 | 13.545 | 15.667 | 18.188 |
| 28 | 0.4213 | 14.025 | 20.752 | 12.712 | 19.773 | 20.406 |
| 28 | 0.4223 | 14.814 | 17.665 | 15.198 | 12.609 | 15.857 |
| 28 | 0.4233 | 16.122 | 13.843 | 12.679 | 19.402 | 11.698 |
| 28 | 0.4243 | 11.513 | 9.167  | 9.070  | 23.048 | 23.862 |
| 28 | 0.4253 | 11.658 | 14.342 | 11.605 | 21.952 | 20.711 |
| 28 | 0.4263 | 11.167 | 8.715  | 7.025  | 11.124 | 17.605 |
| 28 | 0.4273 | 15.011 | 8.028  | 10.611 | 11.386 | 8.796  |
| 28 | 0.4283 | 17.538 | 21.076 | 18.566 | 10.783 | 11.234 |
| 28 | 0.4293 | 20.636 | 14.589 | 15.413 | 13.049 | 14.879 |
| 28 | 0.4303 | 12.043 | 9.625  | 9.880  | 10.189 | 19.791 |
| 28 | 0.4313 | 21.475 | 21.462 | 18.633 | 24.325 | 13.752 |
| 28 | 0.4323 | 1.716  | 2.003  | 2.075  | 2.185  | 2.751  |
| 29 | 0.0005 | 0.000  | 0.000  | 0.000  | 0.000  | 0.000  |
| 29 | 0.0015 | 9.637  | 13.145 | 11.898 | 18.090 | 7.769  |
| 29 | 0.0025 | 15.794 | 12.492 | 19.831 | 21.541 | 8.951  |
| 29 | 0.0035 | 18.243 | 18.683 | 17.309 | 17.020 | 17.573 |
| 29 | 0.0045 | 23.688 | 27.548 | 23.787 | 16.602 | 13.824 |
| 29 | 0.0055 | 12.940 | 10.385 | 11.592 | 10.664 | 9.600  |
| 29 | 0.0065 | 16.120 | 13.659 | 20.849 | 17.074 | 28.487 |
| 29 | 0.0075 | 11.943 | 13.532 | 16.273 | 13.270 | 14.151 |
| 29 | 0.0085 | 14.221 | 14.902 | 15.359 | 18.929 | 9.024  |
| 29 | 0.0095 | 13.764 | 19.105 | 22.598 | 13.100 | 11.882 |
| 29 | 0.0105 | 17.568 | 22.775 | 22.013 | 11.697 | 14.086 |
| 29 | 0.0115 | 13.715 | 11.358 | 13.466 | 8.275  | 12.654 |
| 29 | 0.0125 | 10.141 | 10.271 | 14.044 | 8.510  | 10.219 |
| 29 | 0.0135 | 11.085 | 13.690 | 14.963 | 10.484 | 12.284 |
| 29 | 0.0145 | 9.978  | 10.380 | 14.287 | 18.740 | 19.204 |
| 29 | 0.0155 | 10.527 | 11.109 | 12.258 | 13.208 | 18.874 |

|    |        |        |        |        |        |        |
|----|--------|--------|--------|--------|--------|--------|
| 29 | 0.0165 | 12.852 | 13.302 | 11.554 | 8.937  | 20.635 |
| 29 | 0.0175 | 6.616  | 12.165 | 11.159 | 12.743 | 14.039 |
| 29 | 0.0185 | 15.524 | 16.448 | 16.289 | 8.219  | 15.502 |
| 29 | 0.0195 | 15.727 | 25.518 | 17.165 | 33.286 | 21.484 |
| 29 | 0.0205 | 5.817  | 18.117 | 10.126 | 14.524 | 17.036 |
| 29 | 0.0215 | 15.790 | 22.711 | 13.420 | 17.087 | 26.605 |
| 29 | 0.0225 | 21.246 | 25.290 | 19.078 | 11.662 | 22.843 |
| 29 | 0.0235 | 14.053 | 13.607 | 16.300 | 8.811  | 19.982 |
| 29 | 0.0245 | 20.675 | 23.299 | 22.703 | 16.245 | 26.127 |
| 29 | 0.0255 | 20.683 | 23.484 | 22.802 | 16.217 | 26.088 |
| 29 | 0.0265 | 13.486 | 17.417 | 15.507 | 16.011 | 18.246 |
| 29 | 0.0275 | 25.616 | 23.160 | 26.222 | 12.822 | 16.863 |
| 29 | 0.0285 | 25.512 | 32.184 | 23.427 | 14.204 | 14.480 |
| 29 | 0.0295 | 11.474 | 16.689 | 12.961 | 13.602 | 15.834 |
| 29 | 0.0305 | 11.382 | 16.823 | 13.022 | 13.717 | 15.809 |
| 29 | 0.0315 | 11.001 | 25.132 | 14.393 | 25.223 | 15.433 |
| 29 | 0.0325 | 11.915 | 23.031 | 11.649 | 20.828 | 14.276 |
| 29 | 0.0335 | 15.745 | 25.060 | 15.206 | 16.556 | 16.671 |
| 29 | 0.0345 | 14.992 | 19.374 | 14.742 | 21.685 | 8.160  |
| 29 | 0.0355 | 20.095 | 24.144 | 19.624 | 12.335 | 18.650 |
| 29 | 0.0365 | 7.218  | 11.199 | 9.310  | 20.756 | 22.630 |
| 29 | 0.0375 | 7.987  | 8.381  | 3.465  | 12.371 | 14.514 |
| 29 | 0.0385 | 6.373  | 9.919  | 7.956  | 12.781 | 6.612  |
| 29 | 0.0395 | 17.358 | 15.065 | 15.481 | 10.579 | 22.450 |
| 29 | 0.0405 | 18.839 | 23.022 | 14.589 | 12.706 | 13.921 |
| 29 | 0.0415 | 21.252 | 23.451 | 19.385 | 12.734 | 12.676 |
| 29 | 0.0425 | 20.666 | 23.578 | 19.561 | 12.872 | 18.626 |
| 29 | 0.0435 | 13.623 | 15.508 | 14.343 | 6.935  | 15.405 |
| 29 | 0.0445 | 10.761 | 17.281 | 15.094 | 14.140 | 19.884 |
| 29 | 0.0455 | 4.765  | 16.236 | 10.363 | 14.514 | 9.392  |
| 29 | 0.0465 | 6.089  | 14.061 | 11.061 | 19.623 | 18.021 |
| 29 | 0.0475 | 13.198 | 16.883 | 22.254 | 18.158 | 24.898 |
| 29 | 0.0485 | 11.686 | 13.722 | 15.732 | 13.587 | 20.423 |
| 29 | 0.0495 | 13.630 | 13.947 | 15.925 | 9.249  | 5.722  |
| 29 | 0.0505 | 6.900  | 14.057 | 8.479  | 4.918  | 16.952 |
| 29 | 0.0515 | 10.477 | 12.951 | 13.771 | 10.186 | 19.272 |
| 29 | 0.0525 | 10.260 | 10.227 | 14.905 | 9.659  | 12.571 |
| 29 | 0.0535 | 10.284 | 14.209 | 14.392 | 20.024 | 9.069  |
| 29 | 0.0545 | 15.408 | 17.543 | 20.080 | 14.783 | 18.790 |
| 29 | 0.0555 | 7.466  | 13.108 | 13.118 | 8.776  | 10.757 |
| 29 | 0.0565 | 9.371  | 9.817  | 20.298 | 7.542  | 12.783 |
| 29 | 0.0575 | 22.341 | 27.260 | 30.619 | 7.542  | 6.289  |
| 29 | 0.0585 | 7.736  | 11.951 | 9.379  | 9.923  | 13.282 |
| 29 | 0.0595 | 7.482  | 8.737  | 13.512 | 9.819  | 13.249 |
| 29 | 0.0605 | 18.375 | 19.153 | 30.359 | 11.140 | 12.558 |
| 29 | 0.0615 | 9.738  | 11.458 | 12.244 | 12.057 | 9.679  |
| 29 | 0.0625 | 5.929  | 8.865  | 11.093 | 10.100 | 13.228 |
| 29 | 0.0635 | 11.614 | 23.343 | 15.619 | 22.379 | 14.313 |
| 29 | 0.0645 | 19.442 | 17.394 | 25.773 | 10.189 | 9.943  |
| 29 | 0.0655 | 10.946 | 19.651 | 20.157 | 14.739 | 17.112 |

|    |        |        |        |        |        |        |
|----|--------|--------|--------|--------|--------|--------|
| 29 | 0.0665 | 8.918  | 9.778  | 10.767 | 12.460 | 10.633 |
| 29 | 0.0675 | 9.197  | 12.093 | 10.092 | 16.972 | 14.033 |
| 29 | 0.0685 | 17.433 | 12.742 | 14.439 | 11.990 | 18.938 |
| 29 | 0.0695 | 10.867 | 7.531  | 7.014  | 6.417  | 11.067 |
| 29 | 0.0705 | 11.005 | 12.734 | 9.824  | 18.613 | 18.671 |
| 29 | 0.0715 | 10.682 | 12.774 | 9.156  | 18.605 | 17.908 |
| 29 | 0.0725 | 10.823 | 7.540  | 6.763  | 12.813 | 14.261 |
| 29 | 0.0735 | 11.609 | 12.742 | 12.779 | 6.506  | 14.480 |
| 29 | 0.0745 | 15.136 | 19.673 | 17.359 | 5.613  | 12.095 |
| 29 | 0.0755 | 18.007 | 25.024 | 19.291 | 7.260  | 10.728 |
| 29 | 0.0765 | 8.530  | 12.568 | 11.911 | 7.807  | 11.107 |
| 29 | 0.0775 | 10.752 | 10.829 | 15.269 | 10.435 | 7.712  |
| 29 | 0.0785 | 17.140 | 21.406 | 21.754 | 7.436  | 11.602 |
| 29 | 0.0795 | 16.357 | 16.564 | 17.939 | 8.184  | 9.638  |
| 29 | 0.0805 | 20.930 | 19.833 | 20.395 | 9.704  | 9.026  |
| 29 | 0.0815 | 16.507 | 20.805 | 18.377 | 14.024 | 7.138  |
| 29 | 0.0825 | 14.183 | 16.753 | 16.080 | 16.751 | 9.524  |
| 29 | 0.0835 | 14.259 | 14.266 | 12.824 | 15.173 | 11.272 |
| 29 | 0.0845 | 15.238 | 23.882 | 15.800 | 17.060 | 17.559 |
| 29 | 0.0855 | 13.052 | 18.467 | 16.160 | 14.567 | 13.437 |
| 29 | 0.0865 | 7.357  | 8.185  | 7.697  | 3.665  | 5.267  |
| 29 | 0.0875 | 15.434 | 17.989 | 18.942 | 6.541  | 6.670  |
| 29 | 0.0885 | 15.548 | 18.366 | 17.811 | 10.738 | 2.647  |
| 29 | 0.0895 | 22.505 | 22.925 | 19.673 | 10.715 | 2.565  |
| 29 | 0.0905 | 18.384 | 20.031 | 18.616 | 10.981 | 3.147  |
| 29 | 0.0915 | 10.577 | 6.940  | 8.293  | 4.161  | 4.474  |
| 29 | 0.0925 | 11.178 | 7.896  | 6.005  | 5.210  | 7.002  |
| 29 | 0.0935 | 6.299  | 6.124  | 5.207  | 8.672  | 6.016  |
| 29 | 0.0945 | 11.633 | 11.605 | 10.388 | 7.907  | 6.894  |
| 29 | 0.0955 | 15.479 | 18.815 | 22.967 | 7.942  | 4.336  |
| 29 | 0.0965 | 13.551 | 20.448 | 17.829 | 6.462  | 10.494 |
| 29 | 0.0975 | 11.017 | 8.608  | 15.343 | 12.595 | 9.948  |
| 29 | 0.0985 | 15.032 | 8.428  | 22.207 | 15.469 | 15.871 |
| 29 | 0.0995 | 8.298  | 13.727 | 14.451 | 13.909 | 8.764  |
| 29 | 0.1005 | 15.848 | 14.863 | 18.623 | 6.841  | 3.423  |
| 29 | 0.1015 | 13.893 | 17.788 | 16.788 | 22.088 | 11.529 |
| 29 | 0.1025 | 8.191  | 8.387  | 7.532  | 10.735 | 5.402  |
| 29 | 0.1035 | 16.617 | 20.944 | 17.065 | 20.194 | 13.183 |
| 29 | 0.1045 | 15.843 | 13.919 | 11.268 | 17.493 | 20.351 |
| 29 | 0.1055 | 6.493  | 11.918 | 10.939 | 11.146 | 15.580 |
| 29 | 0.1065 | 14.448 | 17.045 | 16.205 | 11.991 | 7.389  |
| 29 | 0.1075 | 11.968 | 18.262 | 15.047 | 18.973 | 9.983  |
| 29 | 0.1085 | 20.275 | 19.208 | 25.459 | 7.795  | 12.909 |
| 29 | 0.1095 | 9.486  | 14.190 | 15.793 | 6.498  | 9.589  |
| 29 | 0.1105 | 13.057 | 27.852 | 21.317 | 19.096 | 12.516 |
| 29 | 0.1115 | 5.241  | 17.155 | 9.461  | 7.050  | 12.989 |
| 29 | 0.1125 | 13.444 | 15.773 | 17.178 | 11.364 | 6.254  |
| 29 | 0.1135 | 17.084 | 7.753  | 16.229 | 12.603 | 18.328 |
| 29 | 0.1145 | 15.815 | 14.115 | 14.654 | 13.879 | 19.367 |
| 29 | 0.1155 | 14.467 | 23.723 | 22.553 | 10.580 | 11.470 |

|    |        |        |        |        |        |        |
|----|--------|--------|--------|--------|--------|--------|
| 29 | 0.1165 | 24.380 | 21.530 | 32.808 | 4.556  | 12.290 |
| 29 | 0.1175 | 21.647 | 19.522 | 28.465 | 6.377  | 11.509 |
| 29 | 0.1185 | 11.819 | 17.390 | 18.721 | 15.185 | 14.257 |
| 29 | 0.1195 | 8.324  | 15.536 | 12.176 | 11.751 | 7.748  |
| 29 | 0.1205 | 6.475  | 15.412 | 9.536  | 8.718  | 11.834 |
| 29 | 0.1215 | 11.894 | 11.046 | 14.593 | 11.440 | 14.632 |
| 29 | 0.1225 | 15.151 | 11.198 | 22.451 | 9.323  | 13.123 |
| 29 | 0.1235 | 7.508  | 11.151 | 13.129 | 2.616  | 7.381  |
| 29 | 0.1245 | 22.324 | 22.230 | 24.142 | 10.073 | 9.302  |
| 29 | 0.1255 | 19.216 | 28.649 | 25.034 | 19.030 | 19.742 |
| 29 | 0.1265 | 19.444 | 18.357 | 16.022 | 7.885  | 22.410 |
| 29 | 0.1275 | 18.976 | 23.685 | 19.426 | 35.583 | 15.077 |
| 29 | 0.1285 | 20.859 | 13.687 | 24.096 | 9.765  | 12.285 |
| 29 | 0.1295 | 21.788 | 21.517 | 29.515 | 8.173  | 11.052 |
| 29 | 0.1305 | 17.488 | 15.991 | 21.826 | 16.440 | 26.063 |
| 29 | 0.1315 | 12.288 | 14.923 | 18.640 | 12.001 | 19.579 |
| 29 | 0.1325 | 7.702  | 7.132  | 9.952  | 13.912 | 13.388 |
| 29 | 0.1335 | 7.213  | 9.331  | 12.072 | 6.009  | 10.778 |
| 29 | 0.1345 | 7.718  | 10.814 | 16.063 | 3.930  | 14.329 |
| 29 | 0.1355 | 4.995  | 8.756  | 10.046 | 7.994  | 9.184  |
| 29 | 0.1365 | 13.252 | 14.368 | 20.113 | 17.566 | 14.386 |
| 29 | 0.1375 | 14.519 | 14.957 | 19.734 | 15.037 | 15.630 |
| 29 | 0.1385 | 14.195 | 11.043 | 15.983 | 9.407  | 17.651 |
| 29 | 0.1395 | 3.331  | 11.929 | 10.539 | 15.170 | 22.625 |
| 29 | 0.1405 | 13.676 | 14.894 | 19.498 | 12.580 | 14.779 |
| 29 | 0.1415 | 6.541  | 4.921  | 7.562  | 7.269  | 10.643 |
| 29 | 0.1425 | 8.504  | 12.464 | 14.213 | 13.744 | 23.099 |
| 29 | 0.1435 | 10.597 | 15.732 | 16.627 | 17.051 | 27.699 |
| 29 | 0.1445 | 12.726 | 16.470 | 20.691 | 17.037 | 13.599 |
| 29 | 0.1455 | 9.436  | 10.705 | 12.564 | 9.773  | 20.262 |
| 29 | 0.1465 | 8.474  | 7.198  | 7.075  | 7.857  | 11.252 |
| 29 | 0.1475 | 8.482  | 7.296  | 7.064  | 8.071  | 11.211 |
| 29 | 0.1485 | 8.517  | 7.616  | 6.440  | 7.746  | 10.901 |
| 29 | 0.1495 | 7.360  | 5.877  | 8.683  | 10.157 | 25.706 |
| 29 | 0.1505 | 12.259 | 9.258  | 16.468 | 3.335  | 22.142 |
| 29 | 0.1515 | 25.338 | 21.275 | 22.464 | 13.850 | 19.884 |
| 29 | 0.1525 | 23.553 | 13.038 | 14.169 | 5.672  | 7.648  |
| 29 | 0.1535 | 17.255 | 17.806 | 11.970 | 11.431 | 15.776 |
| 29 | 0.1545 | 15.716 | 18.628 | 15.476 | 8.792  | 5.535  |
| 29 | 0.1555 | 15.478 | 18.990 | 16.571 | 9.706  | 19.700 |
| 29 | 0.1565 | 11.844 | 12.045 | 14.546 | 7.168  | 4.268  |
| 29 | 0.1575 | 11.961 | 12.172 | 14.655 | 7.614  | 4.337  |
| 29 | 0.1585 | 22.142 | 24.927 | 22.601 | 8.782  | 13.785 |
| 29 | 0.1595 | 15.783 | 18.759 | 16.682 | 7.865  | 15.274 |
| 29 | 0.1605 | 22.676 | 21.713 | 23.698 | 8.737  | 24.813 |
| 29 | 0.1615 | 23.146 | 24.559 | 23.350 | 18.637 | 20.311 |
| 29 | 0.1625 | 15.146 | 16.730 | 16.852 | 19.325 | 24.777 |
| 29 | 0.1635 | 15.208 | 16.717 | 16.915 | 19.247 | 24.768 |
| 29 | 0.1645 | 17.070 | 19.053 | 17.969 | 18.759 | 18.252 |
| 29 | 0.1655 | 15.084 | 12.314 | 13.720 | 16.568 | 15.433 |



|    |        |        |        |        |        |        |
|----|--------|--------|--------|--------|--------|--------|
| 29 | 0.1665 | 16.560 | 13.041 | 13.659 | 17.608 | 17.611 |
| 29 | 0.1675 | 23.265 | 23.053 | 22.570 | 16.214 | 15.026 |
| 29 | 0.1685 | 22.366 | 21.815 | 22.909 | 13.849 | 5.382  |
| 29 | 0.1695 | 18.403 | 16.080 | 25.419 | 9.395  | 23.902 |
| 29 | 0.1705 | 18.219 | 22.618 | 23.204 | 9.661  | 19.916 |
| 29 | 0.1715 | 25.556 | 17.431 | 22.713 | 12.107 | 13.021 |
| 29 | 0.1725 | 20.799 | 12.497 | 17.800 | 12.186 | 11.141 |
| 29 | 0.1735 | 31.660 | 21.949 | 25.889 | 6.956  | 14.612 |
| 29 | 0.1745 | 31.678 | 21.953 | 25.906 | 6.963  | 14.626 |
| 29 | 0.1755 | 18.835 | 14.606 | 17.061 | 4.913  | 16.923 |
| 29 | 0.1765 | 14.562 | 11.256 | 15.524 | 8.228  | 19.949 |
| 29 | 0.1775 | 14.649 | 11.249 | 15.628 | 8.172  | 19.953 |
| 29 | 0.1785 | 15.886 | 12.677 | 15.540 | 3.293  | 7.183  |
| 29 | 0.1795 | 18.917 | 14.780 | 18.217 | 10.850 | 10.693 |
| 29 | 0.1805 | 23.860 | 22.066 | 25.338 | 15.528 | 14.319 |
| 29 | 0.1815 | 17.510 | 20.883 | 20.568 | 12.578 | 10.875 |
| 29 | 0.1825 | 18.809 | 23.004 | 21.421 | 6.797  | 10.615 |
| 29 | 0.1835 | 17.151 | 15.203 | 22.090 | 4.730  | 21.717 |
| 29 | 0.1845 | 22.391 | 16.568 | 20.190 | 11.312 | 19.320 |
| 29 | 0.1855 | 29.464 | 19.105 | 24.551 | 11.865 | 15.201 |
| 29 | 0.1865 | 17.422 | 20.282 | 20.634 | 9.897  | 14.350 |
| 29 | 0.1875 | 26.719 | 18.696 | 19.475 | 5.286  | 17.459 |
| 29 | 0.1885 | 15.330 | 10.116 | 10.406 | 6.749  | 14.058 |
| 29 | 0.1895 | 9.622  | 22.206 | 18.651 | 13.372 | 25.362 |
| 29 | 0.1905 | 17.293 | 15.644 | 23.142 | 8.849  | 19.650 |
| 29 | 0.1915 | 17.486 | 17.578 | 20.102 | 8.622  | 14.655 |
| 29 | 0.1925 | 10.815 | 14.048 | 12.063 | 11.503 | 15.456 |
| 29 | 0.1935 | 9.286  | 6.267  | 6.719  | 13.027 | 19.082 |
| 29 | 0.1945 | 11.135 | 4.586  | 14.133 | 9.825  | 17.642 |
| 29 | 0.1955 | 22.719 | 13.117 | 25.426 | 10.979 | 17.385 |
| 29 | 0.1965 | 17.268 | 15.785 | 22.637 | 12.598 | 13.497 |
| 29 | 0.1975 | 13.249 | 7.866  | 14.637 | 18.154 | 33.203 |
| 29 | 0.1985 | 16.074 | 8.341  | 14.858 | 14.351 | 27.397 |
| 29 | 0.1995 | 8.436  | 10.569 | 13.884 | 9.101  | 14.506 |
| 29 | 0.2005 | 21.080 | 7.446  | 20.080 | 11.138 | 23.798 |
| 29 | 0.2015 | 13.778 | 13.472 | 17.073 | 5.497  | 28.383 |
| 29 | 0.2025 | 16.332 | 13.291 | 22.323 | 11.896 | 17.613 |
| 29 | 0.2035 | 9.408  | 7.238  | 13.419 | 20.161 | 25.653 |
| 29 | 0.2045 | 9.532  | 7.274  | 13.530 | 20.162 | 25.631 |
| 29 | 0.2055 | 24.258 | 28.382 | 32.837 | 27.441 | 19.238 |
| 29 | 0.2065 | 32.561 | 29.300 | 31.238 | 20.143 | 15.608 |
| 29 | 0.2075 | 23.506 | 31.366 | 30.863 | 20.541 | 17.821 |
| 29 | 0.2085 | 37.422 | 25.988 | 35.589 | 16.770 | 18.549 |
| 29 | 0.2095 | 17.776 | 17.102 | 25.400 | 15.590 | 20.335 |
| 29 | 0.2105 | 15.749 | 16.337 | 14.565 | 8.536  | 16.589 |
| 29 | 0.2115 | 15.724 | 14.647 | 25.041 | 21.916 | 25.605 |
| 29 | 0.2125 | 22.273 | 18.425 | 26.394 | 12.523 | 13.785 |
| 29 | 0.2135 | 14.406 | 25.466 | 20.220 | 23.375 | 15.919 |
| 29 | 0.2145 | 15.492 | 17.804 | 19.130 | 17.648 | 26.280 |
| 29 | 0.2155 | 11.302 | 6.514  | 10.745 | 4.259  | 13.223 |

|    |        |        |        |        |        |        |
|----|--------|--------|--------|--------|--------|--------|
| 29 | 0.2165 | 6.982  | 9.443  | 10.387 | 9.916  | 22.719 |
| 29 | 0.2175 | 11.432 | 6.531  | 13.171 | 21.206 | 24.204 |
| 29 | 0.2185 | 6.125  | 8.658  | 10.891 | 13.876 | 19.992 |
| 29 | 0.2195 | 5.668  | 11.284 | 9.012  | 14.036 | 23.974 |
| 29 | 0.2205 | 7.914  | 13.359 | 14.332 | 11.259 | 22.563 |
| 29 | 0.2215 | 13.723 | 21.426 | 23.345 | 22.697 | 28.663 |
| 29 | 0.2225 | 15.492 | 19.912 | 12.255 | 16.662 | 21.913 |
| 29 | 0.2235 | 8.890  | 15.331 | 10.829 | 7.521  | 14.479 |
| 29 | 0.2245 | 13.766 | 22.780 | 19.610 | 16.081 | 7.697  |
| 29 | 0.2255 | 26.678 | 28.725 | 31.515 | 23.120 | 10.530 |
| 29 | 0.2265 | 16.530 | 30.364 | 23.890 | 13.111 | 16.260 |
| 29 | 0.2275 | 14.456 | 22.644 | 16.262 | 14.537 | 12.113 |
| 29 | 0.2285 | 9.657  | 25.656 | 15.030 | 20.766 | 16.749 |
| 29 | 0.2295 | 7.564  | 16.289 | 15.504 | 15.669 | 22.471 |
| 29 | 0.2305 | 17.850 | 27.156 | 24.546 | 22.672 | 18.201 |
| 29 | 0.2315 | 15.256 | 28.862 | 20.672 | 20.390 | 20.538 |
| 29 | 0.2325 | 17.005 | 32.369 | 18.466 | 18.961 | 21.669 |
| 29 | 0.2335 | 16.509 | 25.632 | 19.289 | 19.587 | 23.980 |
| 29 | 0.2345 | 13.010 | 20.353 | 18.471 | 15.747 | 15.240 |
| 29 | 0.2355 | 23.489 | 23.550 | 27.798 | 15.245 | 9.741  |
| 29 | 0.2365 | 24.071 | 27.971 | 25.898 | 23.828 | 12.233 |
| 29 | 0.2375 | 13.178 | 17.386 | 10.365 | 16.465 | 11.191 |
| 29 | 0.2385 | 15.765 | 15.492 | 22.499 | 10.468 | 7.201  |
| 29 | 0.2395 | 7.923  | 13.106 | 14.076 | 13.475 | 8.266  |
| 29 | 0.2405 | 9.261  | 20.946 | 17.651 | 14.425 | 19.297 |
| 29 | 0.2415 | 9.175  | 14.139 | 15.312 | 23.837 | 23.295 |
| 29 | 0.2425 | 6.713  | 6.245  | 7.632  | 23.888 | 14.646 |
| 29 | 0.2435 | 9.855  | 6.943  | 9.022  | 12.724 | 9.538  |
| 29 | 0.2445 | 14.289 | 22.754 | 24.392 | 12.258 | 25.041 |
| 29 | 0.2455 | 14.036 | 22.502 | 24.172 | 12.234 | 24.763 |
| 29 | 0.2465 | 11.807 | 5.858  | 13.249 | 11.369 | 21.033 |
| 29 | 0.2475 | 10.648 | 16.538 | 11.898 | 14.400 | 13.475 |
| 29 | 0.2485 | 13.470 | 19.312 | 14.256 | 28.523 | 12.895 |
| 29 | 0.2495 | 15.041 | 19.052 | 19.708 | 15.199 | 23.500 |
| 29 | 0.2505 | 8.769  | 9.499  | 9.197  | 11.552 | 27.168 |
| 29 | 0.2515 | 8.875  | 8.614  | 10.701 | 8.107  | 20.651 |
| 29 | 0.2525 | 9.828  | 13.223 | 12.975 | 8.394  | 9.583  |
| 29 | 0.2535 | 12.944 | 18.120 | 21.919 | 32.450 | 22.531 |
| 29 | 0.2545 | 17.784 | 29.141 | 27.903 | 37.736 | 21.015 |
| 29 | 0.2555 | 21.170 | 16.546 | 21.175 | 16.958 | 22.785 |
| 29 | 0.2565 | 6.399  | 13.189 | 9.443  | 14.778 | 11.622 |
| 29 | 0.2575 | 27.980 | 30.265 | 32.656 | 30.689 | 26.539 |
| 29 | 0.2585 | 18.766 | 21.837 | 24.522 | 17.601 | 19.038 |
| 29 | 0.2595 | 15.005 | 18.011 | 17.289 | 23.472 | 11.553 |
| 29 | 0.2605 | 4.780  | 4.435  | 8.733  | 10.947 | 13.799 |
| 29 | 0.2615 | 5.175  | 11.798 | 14.098 | 17.145 | 22.590 |
| 29 | 0.2625 | 26.645 | 22.943 | 30.397 | 16.489 | 8.263  |
| 29 | 0.2635 | 19.594 | 12.046 | 17.538 | 19.213 | 17.482 |
| 29 | 0.2645 | 16.782 | 16.509 | 21.971 | 14.601 | 19.340 |
| 29 | 0.2655 | 10.817 | 12.975 | 17.908 | 5.242  | 13.714 |

|    |        |        |        |        |        |        |
|----|--------|--------|--------|--------|--------|--------|
| 29 | 0.2665 | 16.743 | 19.093 | 19.652 | 22.475 | 14.818 |
| 29 | 0.2675 | 22.534 | 15.909 | 20.915 | 14.394 | 27.756 |
| 29 | 0.2685 | 16.832 | 24.123 | 22.486 | 16.288 | 18.915 |
| 29 | 0.2695 | 10.175 | 23.401 | 14.023 | 16.638 | 20.123 |
| 29 | 0.2705 | 9.529  | 14.333 | 12.307 | 11.286 | 8.857  |
| 29 | 0.2715 | 8.504  | 17.118 | 11.697 | 16.840 | 17.493 |
| 29 | 0.2725 | 8.248  | 12.945 | 8.849  | 16.053 | 13.641 |
| 29 | 0.2735 | 8.143  | 13.060 | 8.713  | 16.642 | 13.718 |
| 29 | 0.2745 | 11.230 | 18.449 | 11.594 | 15.432 | 11.488 |
| 29 | 0.2755 | 17.023 | 20.873 | 14.760 | 24.761 | 23.880 |
| 29 | 0.2765 | 17.005 | 20.828 | 14.722 | 24.725 | 23.864 |
| 29 | 0.2775 | 8.703  | 8.503  | 10.410 | 19.992 | 9.872  |
| 29 | 0.2785 | 14.284 | 11.056 | 16.467 | 23.966 | 14.226 |
| 29 | 0.2795 | 14.137 | 11.035 | 16.367 | 23.662 | 14.273 |
| 29 | 0.2805 | 14.404 | 13.288 | 15.317 | 27.377 | 20.554 |
| 29 | 0.2815 | 14.850 | 9.740  | 14.396 | 21.250 | 20.141 |
| 29 | 0.2825 | 11.137 | 15.965 | 12.495 | 19.926 | 15.771 |
| 29 | 0.2835 | 6.068  | 14.939 | 10.828 | 21.770 | 13.504 |
| 29 | 0.2845 | 8.226  | 11.206 | 11.638 | 17.924 | 10.568 |
| 29 | 0.2855 | 5.229  | 7.971  | 12.182 | 17.354 | 17.648 |
| 29 | 0.2865 | 5.591  | 8.262  | 13.790 | 14.265 | 15.086 |
| 29 | 0.2875 | 10.348 | 8.633  | 12.784 | 11.168 | 8.923  |
| 29 | 0.2885 | 7.142  | 8.082  | 10.279 | 8.849  | 8.240  |
| 29 | 0.2895 | 9.420  | 4.843  | 11.205 | 7.591  | 9.046  |
| 29 | 0.2905 | 8.419  | 10.752 | 12.750 | 10.661 | 8.092  |
| 29 | 0.2915 | 8.406  | 10.745 | 12.752 | 10.662 | 8.100  |
| 29 | 0.2925 | 6.856  | 7.691  | 10.910 | 13.785 | 11.716 |
| 29 | 0.2935 | 4.523  | 11.847 | 8.533  | 16.023 | 17.458 |
| 29 | 0.2945 | 4.777  | 7.690  | 9.179  | 14.549 | 19.774 |
| 29 | 0.2955 | 10.586 | 14.273 | 9.393  | 27.490 | 19.060 |
| 29 | 0.2965 | 9.379  | 19.008 | 9.802  | 30.197 | 20.464 |
| 29 | 0.2975 | 6.310  | 15.146 | 8.205  | 28.316 | 15.087 |
| 29 | 0.2985 | 10.442 | 13.332 | 12.334 | 15.911 | 15.159 |
| 29 | 0.2995 | 9.479  | 8.109  | 14.245 | 12.564 | 14.431 |
| 29 | 0.3005 | 14.935 | 15.225 | 11.718 | 12.734 | 15.162 |
| 29 | 0.3015 | 15.898 | 16.287 | 15.980 | 17.542 | 16.842 |
| 29 | 0.3025 | 5.817  | 7.081  | 8.150  | 21.485 | 12.642 |
| 29 | 0.3035 | 8.640  | 12.795 | 7.729  | 10.256 | 8.543  |
| 29 | 0.3045 | 7.718  | 15.366 | 11.586 | 21.434 | 22.815 |
| 29 | 0.3055 | 4.956  | 9.874  | 6.046  | 25.758 | 27.124 |
| 29 | 0.3065 | 9.730  | 13.411 | 12.198 | 9.554  | 14.747 |
| 29 | 0.3075 | 13.718 | 12.521 | 12.309 | 6.199  | 22.459 |
| 29 | 0.3085 | 14.363 | 12.411 | 14.530 | 5.727  | 13.314 |
| 29 | 0.3095 | 9.487  | 8.655  | 8.604  | 11.101 | 16.649 |
| 29 | 0.3105 | 7.735  | 12.002 | 10.204 | 11.475 | 12.156 |
| 29 | 0.3115 | 7.412  | 11.601 | 11.746 | 10.340 | 6.186  |
| 29 | 0.3125 | 6.745  | 7.358  | 7.427  | 9.486  | 10.188 |
| 29 | 0.3135 | 11.354 | 11.466 | 10.986 | 15.442 | 16.431 |
| 29 | 0.3145 | 16.903 | 14.369 | 21.978 | 16.792 | 16.366 |
| 29 | 0.3155 | 10.162 | 9.148  | 13.235 | 4.816  | 9.885  |

|    |        |        |        |        |        |        |
|----|--------|--------|--------|--------|--------|--------|
| 29 | 0.3165 | 5.953  | 5.203  | 10.427 | 6.088  | 8.729  |
| 29 | 0.3175 | 4.492  | 5.570  | 6.676  | 9.051  | 9.945  |
| 29 | 0.3185 | 12.526 | 13.940 | 13.700 | 7.507  | 14.554 |
| 29 | 0.3195 | 14.960 | 14.807 | 16.084 | 11.219 | 12.428 |
| 29 | 0.3205 | 12.052 | 10.989 | 11.294 | 13.407 | 13.882 |
| 29 | 0.3215 | 8.691  | 10.906 | 12.431 | 13.997 | 14.053 |
| 29 | 0.3225 | 3.223  | 7.125  | 5.678  | 9.764  | 11.888 |
| 29 | 0.3235 | 7.667  | 12.883 | 11.503 | 16.608 | 9.548  |
| 29 | 0.3245 | 7.851  | 9.555  | 12.911 | 11.175 | 26.789 |
| 29 | 0.3255 | 5.301  | 6.621  | 11.393 | 14.953 | 33.169 |
| 29 | 0.3265 | 6.367  | 8.288  | 11.683 | 10.993 | 23.854 |
| 29 | 0.3275 | 4.361  | 8.431  | 8.711  | 6.568  | 8.757  |
| 29 | 0.3285 | 7.717  | 8.713  | 10.216 | 10.116 | 17.895 |
| 29 | 0.3295 | 5.272  | 7.717  | 8.136  | 12.884 | 27.906 |
| 29 | 0.3305 | 11.335 | 9.947  | 11.284 | 16.643 | 27.801 |
| 29 | 0.3315 | 13.126 | 12.157 | 11.903 | 11.290 | 19.747 |
| 29 | 0.3325 | 13.032 | 12.282 | 11.828 | 11.499 | 19.416 |
| 29 | 0.3335 | 7.170  | 3.147  | 7.736  | 9.857  | 19.434 |
| 29 | 0.3345 | 5.739  | 4.552  | 4.261  | 17.393 | 14.399 |
| 29 | 0.3355 | 4.203  | 8.642  | 6.286  | 12.234 | 7.242  |
| 29 | 0.3365 | 7.682  | 5.460  | 9.962  | 19.947 | 14.139 |
| 29 | 0.3375 | 5.331  | 6.332  | 3.465  | 8.957  | 9.240  |
| 29 | 0.3385 | 9.079  | 8.520  | 12.683 | 19.101 | 14.841 |
| 29 | 0.3395 | 16.426 | 7.423  | 8.561  | 18.515 | 23.374 |
| 29 | 0.3405 | 18.367 | 14.311 | 13.411 | 26.957 | 21.660 |
| 29 | 0.3415 | 9.713  | 11.344 | 5.231  | 14.089 | 14.906 |
| 29 | 0.3425 | 11.480 | 6.208  | 6.606  | 7.129  | 10.389 |
| 29 | 0.3435 | 20.358 | 9.917  | 19.336 | 18.630 | 17.332 |
| 29 | 0.3445 | 7.476  | 8.068  | 8.453  | 13.263 | 22.853 |
| 29 | 0.3455 | 18.292 | 13.009 | 16.398 | 18.356 | 26.392 |
| 29 | 0.3465 | 9.302  | 10.831 | 9.265  | 25.875 | 15.638 |
| 29 | 0.3475 | 14.652 | 9.204  | 7.663  | 15.498 | 19.306 |
| 29 | 0.3485 | 10.909 | 9.827  | 7.003  | 9.771  | 6.864  |
| 29 | 0.3495 | 10.799 | 9.716  | 6.815  | 9.717  | 6.876  |
| 29 | 0.3505 | 12.266 | 9.134  | 7.186  | 11.287 | 11.159 |
| 29 | 0.3515 | 11.768 | 17.381 | 12.269 | 19.868 | 25.205 |
| 29 | 0.3525 | 9.053  | 10.334 | 10.204 | 16.276 | 21.408 |
| 29 | 0.3535 | 6.979  | 9.750  | 7.092  | 10.984 | 23.551 |
| 29 | 0.3545 | 7.016  | 9.718  | 7.125  | 10.937 | 23.410 |
| 29 | 0.3555 | 11.545 | 12.150 | 10.355 | 22.074 | 23.599 |
| 29 | 0.3565 | 4.259  | 4.472  | 6.594  | 29.079 | 33.079 |
| 29 | 0.3575 | 2.479  | 6.208  | 6.109  | 5.916  | 16.812 |
| 29 | 0.3585 | 9.681  | 7.524  | 7.047  | 9.946  | 14.935 |
| 29 | 0.3595 | 14.503 | 18.756 | 17.485 | 19.696 | 12.367 |
| 29 | 0.3605 | 15.294 | 17.622 | 17.736 | 14.801 | 12.281 |
| 29 | 0.3615 | 13.479 | 15.165 | 15.801 | 21.160 | 30.647 |
| 29 | 0.3625 | 26.485 | 21.733 | 17.574 | 19.911 | 29.435 |
| 29 | 0.3635 | 26.414 | 21.631 | 17.496 | 19.839 | 29.414 |
| 29 | 0.3645 | 26.344 | 21.525 | 17.417 | 19.762 | 29.390 |
| 29 | 0.3655 | 26.273 | 21.414 | 17.334 | 19.681 | 29.362 |

|    |        |        |        |        |        |        |
|----|--------|--------|--------|--------|--------|--------|
| 29 | 0.3665 | 26.205 | 16.352 | 15.861 | 19.644 | 28.908 |
| 29 | 0.3675 | 7.151  | 3.993  | 5.409  | 9.704  | 16.119 |
| 29 | 0.3685 | 7.135  | 3.954  | 5.407  | 9.498  | 16.359 |
| 29 | 0.3695 | 7.119  | 3.917  | 5.408  | 9.289  | 16.598 |
| 29 | 0.3705 | 23.581 | 11.931 | 16.762 | 19.549 | 18.261 |
| 29 | 0.3715 | 9.743  | 6.193  | 7.234  | 12.196 | 22.109 |
| 29 | 0.3725 | 12.750 | 10.585 | 11.735 | 8.855  | 14.085 |
| 29 | 0.3735 | 14.122 | 9.862  | 12.380 | 14.734 | 21.539 |
| 29 | 0.3745 | 13.213 | 7.977  | 9.754  | 11.585 | 18.415 |
| 29 | 0.3755 | 13.529 | 9.153  | 11.911 | 17.428 | 16.953 |
| 29 | 0.3765 | 5.025  | 3.735  | 3.172  | 19.613 | 15.212 |
| 29 | 0.3775 | 7.049  | 5.419  | 6.676  | 20.804 | 26.173 |
| 29 | 0.3785 | 3.828  | 1.964  | 5.559  | 5.710  | 20.494 |
| 29 | 0.3795 | 19.037 | 17.992 | 18.919 | 12.702 | 24.543 |
| 29 | 0.3805 | 9.181  | 12.211 | 12.932 | 10.805 | 28.600 |
| 29 | 0.3815 | 10.943 | 21.415 | 17.792 | 9.717  | 21.568 |
| 29 | 0.3825 | 11.592 | 17.356 | 14.204 | 14.823 | 13.767 |
| 29 | 0.3835 | 9.242  | 13.539 | 10.158 | 18.754 | 15.829 |
| 29 | 0.3845 | 8.372  | 18.148 | 10.331 | 18.344 | 23.367 |
| 29 | 0.3855 | 9.778  | 16.320 | 13.466 | 15.071 | 16.929 |
| 29 | 0.3865 | 11.721 | 9.169  | 10.298 | 11.539 | 17.997 |
| 29 | 0.3875 | 7.095  | 11.075 | 7.726  | 11.489 | 24.602 |
| 29 | 0.3885 | 9.638  | 12.199 | 15.866 | 21.229 | 29.340 |
| 29 | 0.3895 | 10.375 | 8.344  | 15.056 | 18.168 | 21.200 |
| 29 | 0.3905 | 10.125 | 5.191  | 8.864  | 9.899  | 12.962 |
| 29 | 0.3915 | 16.325 | 8.816  | 14.384 | 5.343  | 17.470 |
| 29 | 0.3925 | 13.812 | 15.343 | 18.961 | 12.654 | 16.876 |
| 29 | 0.3935 | 24.674 | 22.547 | 20.908 | 18.824 | 36.798 |
| 29 | 0.3945 | 18.086 | 10.376 | 14.585 | 9.484  | 28.771 |
| 29 | 0.3955 | 8.615  | 14.021 | 12.427 | 13.715 | 11.896 |
| 29 | 0.3965 | 9.831  | 12.021 | 9.737  | 20.079 | 20.326 |
| 29 | 0.3975 | 13.002 | 6.054  | 8.810  | 11.990 | 22.332 |
| 29 | 0.3985 | 8.700  | 9.268  | 6.377  | 6.610  | 6.065  |
| 29 | 0.3995 | 23.082 | 20.612 | 15.906 | 15.611 | 12.949 |
| 29 | 0.4005 | 7.950  | 13.289 | 11.184 | 20.062 | 17.940 |
| 29 | 0.4015 | 21.940 | 15.758 | 19.145 | 15.273 | 15.596 |
| 29 | 0.4025 | 23.913 | 16.909 | 21.241 | 13.011 | 26.018 |
| 29 | 0.4035 | 13.249 | 8.949  | 8.990  | 10.722 | 24.187 |
| 29 | 0.4045 | 13.497 | 8.222  | 11.749 | 16.533 | 21.743 |
| 29 | 0.4055 | 11.536 | 11.372 | 13.203 | 15.260 | 23.042 |
| 29 | 0.4065 | 10.150 | 8.122  | 10.359 | 9.517  | 14.019 |
| 29 | 0.4075 | 9.990  | 8.017  | 10.313 | 9.435  | 13.933 |
| 29 | 0.4085 | 14.209 | 14.265 | 14.872 | 13.982 | 12.106 |
| 29 | 0.4095 | 15.243 | 19.007 | 15.370 | 11.958 | 23.581 |
| 29 | 0.4105 | 19.816 | 17.489 | 19.953 | 10.849 | 12.603 |
| 29 | 0.4115 | 11.907 | 11.159 | 12.535 | 15.388 | 9.767  |
| 29 | 0.4125 | 13.339 | 12.196 | 11.352 | 20.552 | 23.616 |
| 29 | 0.4135 | 15.632 | 9.812  | 14.975 | 13.315 | 12.278 |
| 29 | 0.4145 | 15.606 | 9.832  | 14.981 | 13.190 | 12.325 |
| 29 | 0.4155 | 17.202 | 10.929 | 15.896 | 16.575 | 5.974  |

|    |        |        |        |        |        |        |
|----|--------|--------|--------|--------|--------|--------|
| 29 | 0.4165 | 8.101  | 10.037 | 9.089  | 13.117 | 10.968 |
| 29 | 0.4175 | 9.570  | 7.476  | 9.786  | 11.833 | 14.276 |
| 29 | 0.4185 | 19.289 | 18.195 | 14.670 | 20.503 | 21.029 |
| 29 | 0.4195 | 19.435 | 18.499 | 14.834 | 20.571 | 20.951 |
| 29 | 0.4205 | 11.509 | 10.219 | 10.539 | 14.248 | 19.192 |
| 29 | 0.4215 | 11.752 | 8.866  | 11.977 | 8.657  | 10.259 |
| 29 | 0.4225 | 11.727 | 8.890  | 11.995 | 8.572  | 10.177 |
| 29 | 0.4235 | 11.252 | 10.112 | 13.100 | 12.243 | 8.651  |
| 29 | 0.4245 | 7.134  | 12.226 | 9.067  | 11.247 | 13.718 |
| 29 | 0.4255 | 10.861 | 7.203  | 9.601  | 11.120 | 15.869 |
| 29 | 0.4265 | 13.162 | 15.088 | 13.587 | 25.948 | 16.543 |
| 29 | 0.4275 | 13.151 | 15.065 | 13.582 | 25.975 | 16.535 |
| 29 | 0.4285 | 13.198 | 13.725 | 15.373 | 25.054 | 25.677 |
| 29 | 0.4295 | 10.044 | 10.586 | 9.365  | 6.482  | 10.635 |
| 29 | 0.4305 | 13.503 | 9.970  | 12.463 | 8.672  | 12.985 |
| 29 | 0.4315 | 5.413  | 5.337  | 4.682  | 15.573 | 23.361 |
| 29 | 0.4325 | 5.027  | 3.276  | 5.680  | 8.222  | 15.608 |
| 29 | 0.4335 | 5.349  | 4.850  | 7.287  | 4.564  | 9.688  |
| 29 | 0.4345 | 9.105  | 13.791 | 9.927  | 17.991 | 14.634 |
| 29 | 0.4355 | 8.117  | 15.358 | 8.041  | 19.206 | 18.916 |
| 29 | 0.4365 | 9.279  | 10.385 | 7.417  | 13.657 | 24.101 |
| 29 | 0.4375 | 6.337  | 7.992  | 4.843  | 13.417 | 17.434 |
| 29 | 0.4385 | 5.933  | 8.542  | 6.048  | 13.287 | 14.886 |
| 29 | 0.4395 | 7.923  | 9.872  | 8.490  | 10.821 | 11.937 |
| 29 | 0.4405 | 6.374  | 14.131 | 9.873  | 18.870 | 20.236 |
| 29 | 0.4415 | 15.355 | 14.007 | 9.354  | 18.584 | 21.758 |
| 29 | 0.4425 | 11.275 | 9.559  | 12.671 | 13.273 | 17.763 |
| 29 | 0.4435 | 4.699  | 8.910  | 5.915  | 8.944  | 22.006 |
| 29 | 0.4445 | 9.667  | 11.324 | 12.490 | 12.613 | 15.666 |
| 29 | 0.4455 | 14.025 | 6.143  | 12.000 | 10.513 | 13.498 |
| 29 | 0.4465 | 15.311 | 17.299 | 16.639 | 10.549 | 11.233 |
| 29 | 0.4475 | 9.919  | 15.417 | 9.940  | 8.612  | 12.921 |
| 29 | 0.4485 | 11.425 | 14.230 | 12.419 | 8.186  | 13.792 |
| 29 | 0.4495 | 12.245 | 16.750 | 18.198 | 18.886 | 17.696 |
| 29 | 0.4505 | 15.680 | 17.758 | 14.896 | 19.857 | 14.306 |
| 29 | 0.4515 | 14.251 | 10.035 | 12.671 | 13.563 | 11.586 |
| 29 | 0.4525 | 3.624  | 5.972  | 5.949  | 18.106 | 20.674 |
| 29 | 0.4535 | 6.854  | 12.342 | 9.721  | 21.005 | 18.375 |
| 29 | 0.4545 | 18.946 | 18.288 | 18.337 | 15.326 | 18.995 |
| 29 | 0.4555 | 19.524 | 26.264 | 24.085 | 14.061 | 14.645 |
| 29 | 0.4565 | 18.583 | 16.000 | 14.996 | 21.582 | 20.368 |
| 29 | 0.4575 | 18.990 | 9.961  | 12.279 | 11.026 | 28.654 |
| 29 | 0.4585 | 18.242 | 15.316 | 10.787 | 16.395 | 15.763 |
| 29 | 0.4595 | 13.835 | 12.491 | 11.308 | 9.760  | 14.401 |
| 29 | 0.4605 | 13.635 | 11.329 | 12.595 | 14.124 | 13.329 |
| 29 | 0.4615 | 17.026 | 16.494 | 11.261 | 13.949 | 15.841 |
| 29 | 0.4625 | 13.346 | 8.228  | 11.579 | 23.827 | 17.948 |
| 29 | 0.4635 | 8.509  | 10.951 | 8.338  | 20.466 | 24.982 |
| 29 | 0.4645 | 4.807  | 3.336  | 4.778  | 11.744 | 15.494 |
| 29 | 0.4655 | 10.629 | 10.958 | 11.968 | 25.451 | 22.549 |

|    |        |        |        |        |        |        |
|----|--------|--------|--------|--------|--------|--------|
| 29 | 0.4665 | 16.355 | 15.699 | 11.980 | 17.333 | 17.319 |
| 29 | 0.4675 | 5.995  | 7.736  | 5.880  | 20.041 | 18.327 |
| 29 | 0.4685 | 8.553  | 7.399  | 8.933  | 15.357 | 20.113 |
| 29 | 0.4695 | 14.914 | 10.380 | 9.747  | 20.297 | 27.791 |
| 29 | 0.4705 | 9.079  | 10.372 | 10.154 | 10.126 | 13.637 |
| 29 | 0.4715 | 8.629  | 6.553  | 6.067  | 7.104  | 15.725 |
| 29 | 0.4725 | 8.643  | 6.579  | 6.097  | 7.089  | 15.646 |
| 29 | 0.4735 | 6.138  | 4.592  | 7.313  | 10.957 | 14.802 |
| 29 | 0.4745 | 11.198 | 6.009  | 13.152 | 12.189 | 13.398 |
| 29 | 0.4755 | 11.279 | 6.085  | 13.298 | 12.250 | 13.326 |
| 29 | 0.4765 | 11.473 | 6.552  | 12.383 | 11.806 | 17.732 |
| 29 | 0.4775 | 10.733 | 8.363  | 9.595  | 16.524 | 16.523 |
| 29 | 0.4785 | 8.009  | 4.801  | 8.901  | 17.179 | 9.441  |
| 29 | 0.4795 | 12.405 | 12.620 | 14.971 | 19.415 | 7.674  |
| 29 | 0.4805 | 7.534  | 11.829 | 11.401 | 25.765 | 9.843  |
| 29 | 0.4815 | 6.049  | 8.782  | 9.617  | 18.805 | 8.435  |
| 29 | 0.4825 | 14.156 | 9.742  | 6.291  | 11.043 | 15.110 |
| 29 | 0.4835 | 0.000  | 0.000  | 0.000  | 0.000  | 0.000  |

S2 Fig

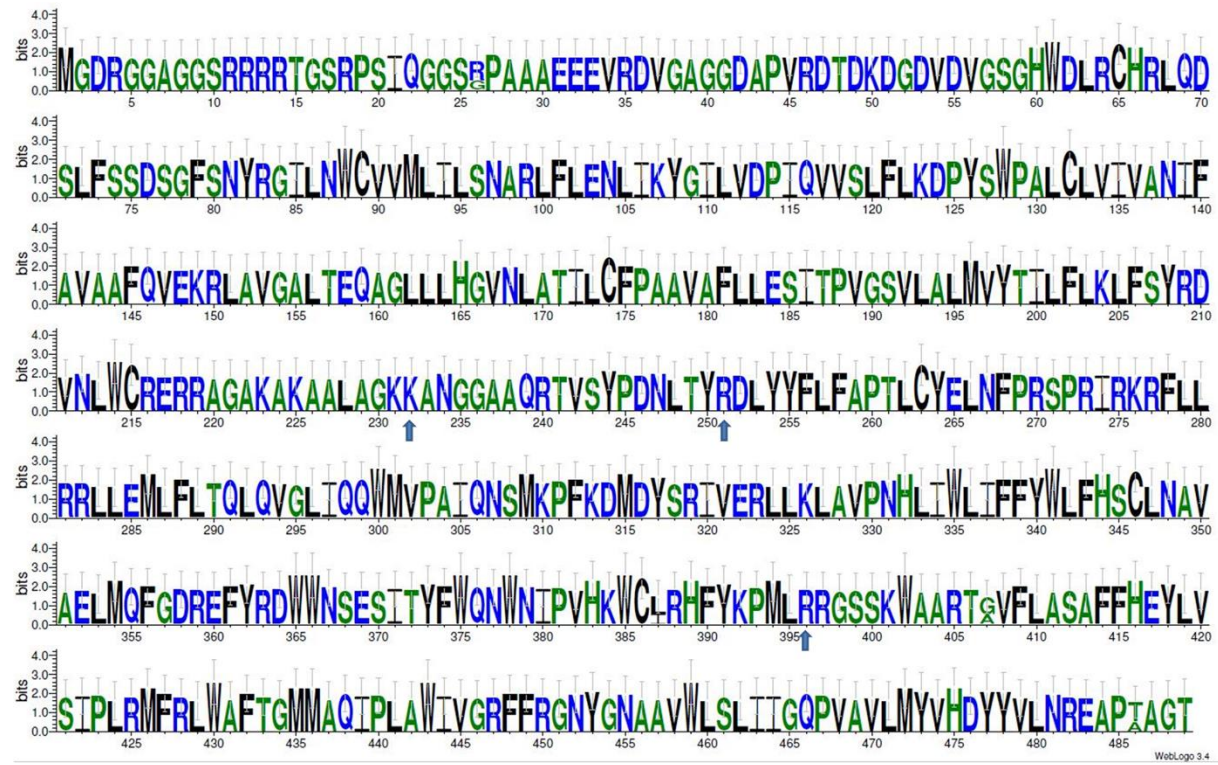



S3 Fig

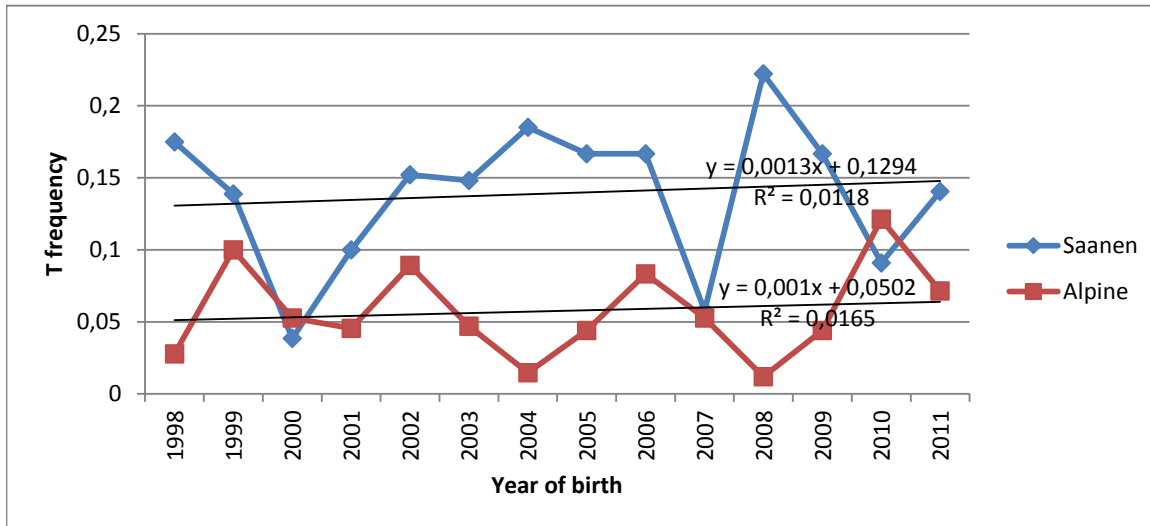

| Year of birth | Alpine | Saanen |
|---------------|--------|--------|
| 1998          | 0,0278 | 0,1750 |
| 1999          | 0,1000 | 0,1389 |
| 2000          | 0,0526 | 0,0385 |
| 2001          | 0,0455 | 0,1000 |
| 2002          | 0,0893 | 0,1522 |
| 2003          | 0,0469 | 0,1481 |
| 2004          | 0,0147 | 0,1852 |
| 2005          | 0,0441 | 0,1667 |
| 2006          | 0,0833 | 0,1667 |
| 2007          | 0,0526 | 0,0577 |
| 2008          | 0,0119 | 0,2222 |
| 2009          | 0,0441 | 0,1667 |
| 2010          | 0,1212 | 0,0909 |
| 2011          | 0,0714 | 0,1406 |

S3 Table: Percent identity matrix of the DGAT1 protein sequence between different species of ruminants

|                        | Ceratotherium<br>simun | Bubalus<br>bubalis | Bos<br>Taurus | Ovis<br>aries | Capra<br>hircus | Camelus<br>dromedaries | Vicugna<br>pacos |
|------------------------|------------------------|--------------------|---------------|---------------|-----------------|------------------------|------------------|
| Bubalus<br>bubalis     | 92.23                  |                    |               |               |                 |                        |                  |
| Bos Taurus             | 93.25                  | 98.98              |               |               |                 |                        |                  |
| Ovis aries             | 93.25                  | 98.16              | 99.18         |               |                 |                        |                  |
| Capra hircus           | 93.25                  | 98.16              | 99.18         | 100.00        |                 |                        |                  |
| Camelus<br>dromedaries | 88.07                  | 88.70              | 89.35         | 88.91         | 88.91           |                        |                  |
| Vicugna<br>pacos       | 90.31                  | 90.70              | 91.53         | 91.53         | 91.53           | 89.96                  |                  |
| Camelus<br>bactrianus  | 91.94                  | 91.93              | 92.75         | 92.75         | 92.75           | 94.31                  | 95.84            |

S4 Table

| Primer         | Sequence (5'3')      | Strand | Location on LT221856 (bp) | Location on CHIR_1.0, chromosome 14 (bp) | Amplified genome region | Protocol       |
|----------------|----------------------|--------|---------------------------|------------------------------------------|-------------------------|----------------|
| DGAT1_00010_Up | AAGGCTGGCCTCTCCAATAG | plus   | 11-30                     | 11241010-11241029                        |                         |                |
| DGAT1_01489_Dn | TGGACCGAGGCTAATTACC  | minus  | 1470-1489                 | 11242469-11242488                        | promotor                | standard PCR   |
| DGAT1_00010_Up | AAGGCTGGCCTCTCCAATAG | plus   | 11-30                     | 11241010-11241029                        |                         |                |
| DGAT1_02730_Dn | CATAAGCTCCGGGAATGGAG | minus  | 2739-2758                 | 11243710-11243729                        | promotor                | long range PCR |
| DGAT1_02505_Up | CTCAGCATTGCTGCTTCTC  | plus   | 2534-2553                 | 11243505-11243524                        |                         |                |
| DGAT1_04109_Dn | CAGCCTTGGCTCCGTCT    | minus  | 4101-4118                 | 11245091-11245108                        | promotor                | long range PCR |
| DGAT1_03779_Up | GAATCATGCCAGATCCTTC  | plus   | 3799-3818                 | 11244789-11244808                        |                         |                |
| DGAT1_04607_Dn | TCCTGCAGGTCACACTTGTT | minus  | 4597-4616                 | ND                                       | promotor                | standard PCR   |
| DGAT1_04350_Up | CAGGGAGTAGCCATGTGGTC | plus   | 4361-4380                 | 11245351-11245370                        |                         |                |
| DGAT1_05308_Dn | CCAACAAGCCCTGGAGAAT  | minus  | 5309-5327                 | 11246299-11246317                        | promotor                | standard PCR   |
| DGAT1_05090_Up | GTCACATTTCTGGGGTTCA  | plus   | 5100-5119                 | 11246090-11246109                        |                         |                |
| DGAT1_07698_Dn | GACCCGAGTGCAATCCTTT  | minus  | 7689-7707                 | 11248680-11248698                        | promotor                | long range PCR |
| DGAT1_07451_Up | CAAACCGCATGGACTTATCC | plus   | 7461-7480                 | 11248452-11248471                        |                         |                |
| DGAT1_09978_Dn | TTGCTCTATAGTCGGCTTCG | minus  | 8002-8021                 | 11250959-11250978                        | promotor                | long range PCR |
| DGAT1_07451_Up | CAAACCGCATGGACTTATCC | plus   | 7461-7480                 | 11248452-11248471                        |                         |                |
| DGAT1_07868_Dn | CCGAGGCTTTGGCTTAGAC  | minus  | 7859-7877                 | ND                                       | promotor                | standard PCR   |
| DGAT1_09801_Up | TTGCCAATTTACACCCGTCT | plus   | 7843-7862                 | ND                                       |                         |                |
| DGAT1_09978_Dn | TTGCTCTATAGTCGGCTTCG | minus  | 8002-8021                 | 11250959-11250978                        | promotor                | standard PCR   |
| DGAT1_07451_Up | CAAACCGCATGGACTTATCC | plus   | 7461-7480                 | 11248452-11248471                        |                         |                |
| DGAT1_07698_Dn | GACCCGAGTGCAATCCTTT  | minus  | 7689-7707                 | 11248680-11248698                        | promotor                | standard PCR   |
| DGAT1_07451_Up | CAAACCGCATGGACTTATCC | plus   | 7461-7480                 | 11248452-11248471                        |                         |                |
| DGAT1_10825_Dn | GCATCTCGGGCCCTACTTAT | minus  | 9109-9128                 | 11252066-11252085                        | promotor                | long range PCR |
| DGAT1_10763_Up | CTCCATCCCAGCTCAGTGTT | plus   | 8807-8826                 | 11251764-11251783                        |                         |                |
| DGAT1_12284_Dn | AACTGACAGTGCTCCCCAGA | minus  | 10325-10344               | 11253265-11253284                        | promotor                | standard PCR   |

|                |                      |       |             |                   |                  |                |
|----------------|----------------------|-------|-------------|-------------------|------------------|----------------|
| DGAT1_12015_Up | GGCTCAGACAACCAAGGAAC | plus  | 10076-10095 | 11253016-11253035 |                  |                |
| DGAT1_14222_Dn | TAAGCAAAGCTGGGAAGACC | minus | 12262-12281 | 11255203-11255222 | promotor         | long range PCR |
| DGAT1_12713_Up | CTCCTAGAGGCCCACTCCTC | plus  | 10774-10793 | 11253714-11253733 |                  |                |
| DGAT1_15492_Dn | ACGTCTCCGTCCTTGTCTGT | minus | 13532-13551 | 11256510-11256529 | promotor         | long range PCR |
| DGAT1_12713_Up | CTCCTAGAGGCCCACTCCTC | plus  | 10774-10793 | 11253714-11253733 |                  |                |
| DGAT1_14222_Dn | TAAGCAAAGCTGGGAAGACC | minus | 12262-12281 | 11255203-11255222 | promotor         | standard PCR   |
| DGAT1_15133_Up | GAGCTACGCTTCCCAGGACT | plus  | 13193-13212 | 11256134-11256153 |                  |                |
| DGAT1_15728_Dn | CCAACCTCCCCTAAGTTTC  | minus | 13739-13758 | 11256709-11256728 | exon 1 /intron1  | standard PCR   |
| DGAT1_15669_Up | GCGTGACCCCTAACCTTTG  | plus  | 13592-13610 | 11256570-11256588 |                  |                |
| DGAT1_16894_dn | CATCCTCGCCACCAACTG   | minus | 14898-14915 | 11257877-11257894 | intron 1         | standard PCR   |
| DGAT1_15669_Up | GCGTGACCCCTAACCTTTG  | plus  | 13592-13610 | 11256570-11256588 |                  |                |
| DGAT1_16434_Dn | GACTGACCTGTTGCCATTT  | minus | 14436-14455 | 11257415-11257434 | intron 1         | standard PCR   |
| DGAT1_16267_Up | CATCGGCTAAGTCCTGCTG  | plus  | 14298-14316 | 11257268-11257286 |                  |                |
| DGAT1_16894_dn | CATCCTCGCCACCAACTG   | minus | 14898-14915 | 11257877-11257894 | intron 1         | standard PCR   |
| DGAT1_16803_up | AGGCCAGATGGGCAGAAG   | plus  | 14824-14841 | 11257803-11257820 |                  |                |
| DGAT1_17904_dn | AATCCCCACAGAGGTCCAG  | minus | 15767-15785 | 11258886-11258904 | intron 1         | standard PCR   |
| DGAT1_17802_up | CAGAGAAGCTCTGGGTGAGG | plus  | 15683-15702 | 11258802-11258821 |                  |                |
| DGAT1_18835_dn | GCTAAGCCTAGGGGAGATGG | minus | 16697-16716 | 11259816-11259835 | intron 1         | standard PCR   |
| DGAT1_18542_up | TCCTGGGTGCAGCCATCT   | plus  | 16423-16440 | ND                |                  |                |
| DGAT1_22043_dn | GACCCCTCCCTTCAGAG    | minus | 19706-19723 | 11263026-11263043 | exon 2 to exon 5 | long range PCR |
| DGAT1_18542_up | TCCTGGGTGCAGCCATCT   | plus  | 16423-16440 | ND                |                  |                |
| DGAT1_19349_Dn | CAGCATCACACACCAAT    | minus | 17211-17230 | 11260330-11260349 | exon 2           | standard PCR   |
| DGAT1_19239_up | GAGTGTCATCTCCGCTCTC  | plus  | 17120-17139 | 11260239-11260258 |                  |                |
| DGAT1_20414_dn | GCATGGACTATTGGGTCTGG | minus | 18089-18108 | 11261395-11261414 | exon 2           | standard PCR   |
| DGAT1_20271_up | CCCCTCCAGCTGACGTGTCT | plus  | 17965-17984 | 11261271-11261290 |                  |                |
| DGAT1_22043_dn | GACCCCTCCCTTCAGAG    | minus | 19706-19723 | 11263026-11263043 | exon 3 to exon 5 | long range PCR |

|                 |                       |       |             |                   |                       |                |
|-----------------|-----------------------|-------|-------------|-------------------|-----------------------|----------------|
| DGAT1_21866_Up  | GTAAGCAGTGCCTCACACC   | plus  | 19540-19559 | ND                | intron 5 to intron 12 | standard PCR   |
| DGAT1_23269_Dn  | GTAGAACTCGCGGTCTCAA   | minus | 20929-20948 | 11264250-11264269 |                       |                |
| ovDGAT1_6865_up | CCATCCTCTTCTCAAGCTG   | plus  | 19971-19990 | ND                | intron 7 to intron 12 | standard PCR   |
| DGAT1_23269_Dn  | GTAGAACTCGCGGTCTCAA   | minus | 20929-20948 | 11264250-11264269 |                       |                |
| DGAT1_23175_up  | ACCACCTCATCTGGCTCATC  | plus  | 20854-20873 | 11264175-11264194 | intron 13 to exon 17  | standard PCR   |
| DGAT1_24187_dn  | GCTGTAGGGTTCCAGAGCA   | minus | 21848-21867 | 11265168-11265187 |                       |                |
| DGAT1_23459_Up  | GATAGTGGGCCGCTTCTTC   | plus  | 21501-21519 | 11264821-11264839 | 3'-end                | long range PCR |
| DGAT1_25144_Dn  | ATGGACGAACAGACCGATGA  | minus | 23185-23204 | 11266505-11266524 | 3'-end                | long range PCR |
| DGAT1_25011_Up  | CAGTCCCTCCGAGACATTG   | plus  | 23072-23091 | 11266392-11266411 |                       |                |
| DGAT1_26711_Dn  | GCAGTTTGCTCGCACTC     | minus | 24615-24632 | 11268074-11268091 | 3'-end                | long range PCR |
| DGAT1_26596_Up  | CTCCCTCCCCAGTAGGACAG  | plus  | 24518-24537 | 11267977-11267996 |                       |                |
| DGAT1_28298_Dn  | ATCCTCAGTCCAGGCAGAGA  | minus | 25909-25928 | 11269659-11269678 | 3'-end                | long range PCR |
| DGAT1_29731_Up  | CGATGTGGACCACCTTCC    | plus  | 27362-27379 | 11271111-11271128 | 3'-end                | long range PCR |
| DGAT1_31443_Dn  | TGATCACTGAGGTGCCTACG  | minus | 29054-29073 | 11272822-11272803 |                       |                |
| DGAT1_31239_Up  | GAGGTCCAAGGCAGCTCTGT  | plus  | 28870-28889 | 11272619-11272638 | 3'-end                | standard PCR   |
| DGAT1_32689_Dn  | GTGGTTCACAGGATCTCCGTA | minus | 30299-30319 | 11274068-11274048 |                       |                |
| DGAT1_32663_Up  | GCAGCTACGGAGATCCTGTG  | plus  | 30294-30313 | 11274043-11274062 | 3'-end                | long range PCR |
| DGAT1_34366_Dn  | TAGAGCCTCTCCATCTTTGG  | minus | 31977-31996 | ND                |                       |                |
| DGAT1_34123_Up  | TAGGGGATTGGAATGCAAAA  | plus  | 31754-31773 | ND                | 3'-end                | standard PCR   |
| DGAT1_35025_Dn  | GGAATTCATCACCTCCACT   | minus | 32636-32655 | ND                |                       |                |
| DGAT1_34772_Up  | AGCGGTCAATGCAAAGAAAT  | plus  | 32403-32422 | ND                | 3'-end                | standard PCR   |
| DGAT1_35908_Dn  | TCCAAGAAGCAAGGGTCTTT  | minus | 33519-33538 | ND                |                       |                |
| DGAT1_37001_Up  | GAAAGCAAGGCTCCTGTGG   | plus  | 34632-34650 | 11278381-11278399 | 3'-end                | long range PCR |
| DGAT1_38726_Dn  | AGACCAGCTGTGGTGGAACT  | minus | 36337-36356 | 11280086-11280105 |                       |                |
| DGAT1_38516_Up  | GGACTCCTCGGCAGGAAG    | plus  | 36147-36164 | 11279896-11279913 | 3'-end                | standard PCR   |
| DGAT1_39611_Dn  | TCACTAAGCCCTGCATTCA   | minus | 37228-37247 | 11280977-11280996 |                       |                |

---

|                |                                     |       |                       |                   |                               |                      |
|----------------|-------------------------------------|-------|-----------------------|-------------------|-------------------------------|----------------------|
| DGAT1_22102_Up | GGCAGGTAAGAAGCCAAC                  | plus  | 20159-20177           | 71353600-71353615 |                               |                      |
| DGAT1_22324_Dn | AGGAAGCGCTTTCGGATG                  | minus | 20364-20381           | ND                | exon 8                        | standard PCR-RFLP    |
| DGAT1_23126_Up | GACACTTCTACAAGCCCATGC               | plus  | 21184-21204           | 11264504-11264524 |                               |                      |
| DGAT1_23310_Dn | GGGGATGCTCACCAGGTACT                | minus | 21348-21367           | 11264668-11264687 | exon 15                       | standard PCR-RFLP    |
| DGAT1_00801_Dn | TGGGAAAGGACAGTTGGAGA                | minus | 792-811               | 11241791-11241810 |                               | sequencing           |
| DGAT1_03104_Up | TAAAGCAAGGCTCCCAGAGA                | plus  | 3115-3134             | ND                |                               | sequencing           |
| DGAT1_05090_Up | GTCACATTTCTGGGGTTCA                 | plus  | 5100-5119             | 11246090-11246109 |                               | sequencing           |
| DGAT1_05592_Up | GATGCGAGTCTTCCCTCCT                 | plus  | 5593-5612             | ND                |                               | sequencing           |
| DGAT1_08448_Dn | CTCTCTGCACGTGTGACCAT                | minus | 8429-8448             | 11250263-11250282 |                               | sequencing           |
| DGAT1_26923_Up | CAGCTCCCCTCGGTAAGTC                 | plus  | 24865-24883           | ND                |                               | sequencing           |
| DGAT1_27623_Dn | TCCTAGGGGTGAAGAGAAAGA               | minus | 25544-25564           | ND                |                               | sequencing           |
| DGAT1_1        | GCGGGCTGAGGCCATG                    | plus  | 13378-13396           | ND                |                               |                      |
| DGAT1_2        | AGTGGTGAGGCAAAGCAGTC                | minus | 21675-21694           | 11264995-11265014 | complete cDNA                 | standard PCR         |
| DGAT1_3        | CTGAGGGGATCCATGGGCGACCGCGGCGCGGGC   | plus  | ND                    | ND                | complete cDNA and TOPO vector | subcloning           |
| DGAT1_4        | ACCAGCCTCGAGGGGCTCAGGTGCCGGCTGTTG   | minus | ND                    | ND                |                               |                      |
| DGAT1_R251L_up | CGACAACCTGACCTACCTCGATCTCTACTACTCC  | plus  | 20210-20229/20300-    |                   |                               |                      |
| DGAT1_R251L_dn | GGAAGTAGTAGAGATCGAGGTAGGTCAGGTTGTCC | minus | 20315 (Partial Match) | ND                | cDNA                          | Directed mutagenesis |
| DGAT1_W396R_up | AGCCCATGCTCCGGCGGGGCAGC             | plus  |                       |                   |                               |                      |
| DGAT1_W396R_dn | GCTGCCCCCGGAGCATGGGCT               | minus | 21196-21218           | 11264516-11264538 | cDNA                          | Directed mutagenesis |
